# Supplementary material for: Multicomponent Synthesis of Luminescent Iminoboronates
Source: Molecules. 2020 Dec 21;25(24):6039. doi: 10.3390/molecules25246039 (PMC7766465; doi:10.3390/molecules25246039)
Supplement: Supplementary file 1 [file molecules-25-06039-s001.zip]

Archive with 8 entries (8 files):
- 1a checkcif.pdf
- 1a.cif
- 1d checkcif.pdf
- 1d.cif
- 1e checkcif.pdf
- 1e.cif
- cif deposition.pdf
- Molecules SI.docx
