# Supplementary material for: Multicomponent Synthesis of Luminescent Iminoboronates
Source: Molecules. 2020 Dec 21;25(24):6039. doi: 10.3390/molecules25246039 (PMC7766465; doi:10.3390/molecules25246039)
Supplement: Supplementary file 1 [file molecules-25-06039-s001.zip › 1a.cif]

 
data_samuel_sg696_0m
 
_audit_creation_method            SHELXL-97
_chemical_name_systematic
;
 ?
;
_chemical_name_common             ?
_chemical_melting_point           ?
_chemical_formula_moiety          'C20 H14 B N O3'
_chemical_formula_sum
 'C20 H14 B N O3'
_chemical_formula_weight          327.13
 
loop_
 _atom_type_symbol
 _atom_type_description
 _atom_type_scat_dispersion_real
 _atom_type_scat_dispersion_imag
 _atom_type_scat_source
 'C'  'C'   0.0033   0.0016
 'International Tables Vol C Tables 4.2.6.8 and 6.1.1.4'
 'H'  'H'   0.0000   0.0000
 'International Tables Vol C Tables 4.2.6.8 and 6.1.1.4'
 'B'  'B'   0.0013   0.0007
 'International Tables Vol C Tables 4.2.6.8 and 6.1.1.4'
 'N'  'N'   0.0061   0.0033
 'International Tables Vol C Tables 4.2.6.8 and 6.1.1.4'
 'O'  'O'   0.0106   0.0060
 'International Tables Vol C Tables 4.2.6.8 and 6.1.1.4'
 
_symmetry_cell_setting            Monoclinic
_symmetry_space_group_name_H-M    C2/c
_symmetry_space_group_name_Hall   -C2yc
 
loop_
 _symmetry_equiv_pos_as_xyz
 'x, y, z'
 '-x, y, -z+1/2'
 'x+1/2, y+1/2, z'
 '-x+1/2, y+1/2, -z+1/2'
 '-x, -y, -z'
 'x, -y, z-1/2'
 '-x+1/2, -y+1/2, -z'
 'x+1/2, -y+1/2, z-1/2'
 
_cell_length_a                    28.300(2)
_cell_length_b                    7.6129(7)
_cell_length_c                    17.6359(14)
_cell_angle_alpha                 90.00
_cell_angle_beta                  121.819(4)
_cell_angle_gamma                 90.00
_cell_volume                      3228.5(5)
_cell_formula_units_Z             8
_cell_measurement_temperature     150(2)
_cell_measurement_reflns_used     5432
_cell_measurement_theta_min       2.46
_cell_measurement_theta_max       25.78
 
_exptl_crystal_description        flake
_exptl_crystal_colour             yellow
_exptl_crystal_size_max           0.70
_exptl_crystal_size_mid           0.10
_exptl_crystal_size_min           0.04
_exptl_crystal_density_meas       ?
_exptl_crystal_density_diffrn     1.346
_exptl_crystal_density_method     'not measured'
_exptl_crystal_F_000              1360
_exptl_absorpt_coefficient_mu     0.090
_exptl_absorpt_correction_type    multi-scan
_exptl_absorpt_correction_T_min   0.9398
_exptl_absorpt_correction_T_max   0.9964
_exptl_absorpt_process_details    '(SADABS; Bruker, 2008)'
 
_exptl_special_details
;
 ?
;
 
_diffrn_ambient_temperature       150(2)
_diffrn_radiation_wavelength      0.71073
_diffrn_radiation_type            MoK\a
_diffrn_radiation_source          'fine-focus sealed tube'
_diffrn_radiation_monochromator   graphite
_diffrn_measurement_device_type   "ccd"
_diffrn_measurement_method        "omega and phi scans"
_diffrn_detector_area_resol_mean  ?
_diffrn_standards_number          ?
_diffrn_standards_interval_count  0.5
_diffrn_standards_interval_time   60
_diffrn_standards_decay_%         ?
_diffrn_reflns_number             13039
_diffrn_reflns_av_R_equivalents   0.0757
_diffrn_reflns_av_sigmaI/netI     0.0726
_diffrn_reflns_limit_h_min        -34
_diffrn_reflns_limit_h_max        33
_diffrn_reflns_limit_k_min        -9
_diffrn_reflns_limit_k_max        9
_diffrn_reflns_limit_l_min        -21
_diffrn_reflns_limit_l_max        21
_diffrn_reflns_theta_min          2.32
_diffrn_reflns_theta_max          25.38
_reflns_number_total              2890
_reflns_number_gt                 1914
_reflns_threshold_expression      >2\s(I)
 
_computing_data_collection        'Bruker SMART'
_computing_cell_refinement        'Bruker SMART'
_computing_data_reduction         'Bruker SAINT'
_computing_structure_solution     'SHELXS-97 (Sheldrick, 2008)'
_computing_structure_refinement   'SHELXL-97 (Sheldrick, 2008)'
_computing_molecular_graphics     'PLATON (Spek, 2009)'
_computing_publication_material   'SHELXL-97 (Sheldrick, 2008)'
 
_refine_special_details
;
 Refinement of F^2^ against ALL reflections.  The weighted R-factor wR and
 goodness of fit S are based on F^2^, conventional R-factors R are based
 on F, with F set to zero for negative F^2^. The threshold expression of
 F^2^ > 2\s(F^2^) is used only for calculating R-factors(gt) etc. and is
 not relevant to the choice of reflections for refinement.  R-factors based
 on F^2^ are statistically about twice as large as those based on F, and R-
 factors based on ALL data will be even larger.
;
 
_refine_ls_structure_factor_coef  Fsqd
_refine_ls_matrix_type            full
_refine_ls_weighting_scheme       calc
_refine_ls_weighting_details
 'calc w=1/[\s^2^(Fo^2^)+(0.0549P)^2^+2.8233P] where P=(Fo^2^+2Fc^2^)/3'
_atom_sites_solution_primary      direct
_atom_sites_solution_secondary    difmap
_atom_sites_solution_hydrogens    geom
_refine_ls_hydrogen_treatment     constr
_refine_ls_extinction_method      none
_refine_ls_extinction_coef        ?
_refine_ls_number_reflns          2890
_refine_ls_number_parameters      226
_refine_ls_number_restraints      0
_refine_ls_R_factor_all           0.1076
_refine_ls_R_factor_gt            0.0663
_refine_ls_wR_factor_ref          0.1549
_refine_ls_wR_factor_gt           0.1390
_refine_ls_goodness_of_fit_ref    1.128
_refine_ls_restrained_S_all       1.128
_refine_ls_shift/su_max           0.000
_refine_ls_shift/su_mean          0.000
 
loop_
 _atom_site_label
 _atom_site_type_symbol
 _atom_site_fract_x
 _atom_site_fract_y
 _atom_site_fract_z
 _atom_site_U_iso_or_equiv
 _atom_site_adp_type
 _atom_site_occupancy
 _atom_site_symmetry_multiplicity
 _atom_site_calc_flag
 _atom_site_refinement_flags
 _atom_site_disorder_assembly
 _atom_site_disorder_group
O2 O 0.08921(8) 0.4076(2) 0.11687(13) 0.0292(5) Uani 1 1 d . . .
O1 O 0.02500(8) 0.2234(2) 0.12259(13) 0.0308(5) Uani 1 1 d . . .
C08 C 0.15674(11) 0.1163(3) 0.12847(18) 0.0236(7) Uani 1 1 d . . .
N1 N 0.10546(9) 0.0872(3) 0.12469(15) 0.0233(6) Uani 1 1 d . . .
O3 O 0.14077(9) 0.5863(3) 0.09132(16) 0.0426(6) Uani 1 1 d . . .
C06 C 0.03107(12) -0.0863(4) 0.1079(2) 0.0270(7) Uani 1 1 d . . .
C13 C 0.17034(12) 0.2905(3) 0.12342(19) 0.0265(7) Uani 1 1 d . . .
C20 C 0.11779(12) 0.4058(4) 0.3076(2) 0.0308(7) Uani 1 1 d . . .
H20 H 0.0966 0.5008 0.2733 0.037 Uiso 1 1 calc R . .
C14 C 0.13271(13) 0.4401(4) 0.1101(2) 0.0294(7) Uani 1 1 d . . .
C09 C 0.19250(12) -0.0194(4) 0.1402(2) 0.0282(7) Uani 1 1 d . . .
H09 H 0.1833 -0.1350 0.1439 0.034 Uiso 1 1 calc R . .
C01 C 0.00467(12) 0.0616(4) 0.1175(2) 0.0283(7) Uani 1 1 d . . .
C02 C -0.04390(12) 0.0382(4) 0.1179(2) 0.0374(8) Uani 1 1 d . . .
H02 H -0.0625 0.1347 0.1223 0.045 Uiso 1 1 calc R . .
C15 C 0.12036(11) 0.2544(3) 0.26466(19) 0.0240(7) Uani 1 1 d . . .
C07 C 0.08002(12) -0.0631(4) 0.10448(19) 0.0262(7) Uani 1 1 d . . .
H07 H 0.0937 -0.1564 0.0877 0.031 Uiso 1 1 calc R . .
C16 C 0.15286(12) 0.1176(4) 0.3197(2) 0.0287(7) Uani 1 1 d . . .
H16 H 0.1558 0.0153 0.2937 0.034 Uiso 1 1 calc R . .
C12 C 0.22039(12) 0.3242(4) 0.1293(2) 0.0330(8) Uani 1 1 d . . .
H12 H 0.2300 0.4395 0.1257 0.040 Uiso 1 1 calc R . .
C19 C 0.14592(13) 0.4175(4) 0.3996(2) 0.0349(8) Uani 1 1 d . . .
H19 H 0.1435 0.5196 0.4263 0.042 Uiso 1 1 calc R . .
C10 C 0.24237(12) 0.0188(4) 0.1462(2) 0.0330(8) Uani 1 1 d . . .
H10 H 0.2667 -0.0716 0.1544 0.040 Uiso 1 1 calc R . .
C03 C -0.06430(13) -0.1282(4) 0.1118(2) 0.0425(9) Uani 1 1 d . . .
H03 H -0.0962 -0.1429 0.1138 0.051 Uiso 1 1 calc R . .
C11 C 0.25598(13) 0.1900(4) 0.1402(2) 0.0368(8) Uani 1 1 d . . .
H11 H 0.2892 0.2147 0.1435 0.044 Uiso 1 1 calc R . .
C04 C -0.03870(13) -0.2753(4) 0.1026(2) 0.0409(9) Uani 1 1 d . . .
H04 H -0.0532 -0.3868 0.0989 0.049 Uiso 1 1 calc R . .
C05 C 0.00828(12) -0.2542(4) 0.0990(2) 0.0336(8) Uani 1 1 d . . .
H05 H 0.0250 -0.3513 0.0907 0.040 Uiso 1 1 calc R . .
C17 C 0.18099(12) 0.1281(4) 0.4118(2) 0.0333(8) Uani 1 1 d . . .
H17 H 0.2022 0.0338 0.4466 0.040 Uiso 1 1 calc R . .
C18 C 0.17748(12) 0.2784(4) 0.4518(2) 0.0348(8) Uani 1 1 d . . .
H18 H 0.1963 0.2861 0.5136 0.042 Uiso 1 1 calc R . .
B1 B 0.08472(14) 0.2452(4) 0.1582(2) 0.0254(8) Uani 1 1 d . . .
 
loop_
 _atom_site_aniso_label
 _atom_site_aniso_U_11
 _atom_site_aniso_U_22
 _atom_site_aniso_U_33
 _atom_site_aniso_U_23
 _atom_site_aniso_U_13
 _atom_site_aniso_U_12
O2 0.0342(12) 0.0189(11) 0.0418(13) 0.0030(9) 0.0251(11) 0.0048(9)
O1 0.0272(12) 0.0230(12) 0.0440(13) -0.0041(9) 0.0201(11) 0.0021(9)
C08 0.0233(16) 0.0215(16) 0.0300(16) -0.0025(12) 0.0168(14) -0.0010(12)
N1 0.0249(13) 0.0172(13) 0.0298(14) 0.0009(10) 0.0158(11) 0.0020(10)
O3 0.0580(15) 0.0168(12) 0.0693(17) 0.0037(10) 0.0448(14) 0.0017(10)
C06 0.0233(16) 0.0256(17) 0.0345(17) -0.0008(13) 0.0169(14) 0.0004(13)
C13 0.0287(17) 0.0215(16) 0.0320(17) -0.0021(12) 0.0180(15) 0.0008(13)
C20 0.0310(17) 0.0266(17) 0.0397(19) -0.0010(13) 0.0220(16) 0.0019(14)
C14 0.0362(19) 0.0213(17) 0.0344(18) -0.0033(13) 0.0212(16) -0.0004(13)
C09 0.0331(17) 0.0155(15) 0.0413(19) -0.0022(12) 0.0233(16) -0.0017(13)
C01 0.0257(16) 0.0246(17) 0.0342(18) -0.0026(13) 0.0156(14) 0.0006(13)
C02 0.0270(17) 0.038(2) 0.051(2) -0.0069(15) 0.0237(17) 0.0029(15)
C15 0.0216(15) 0.0187(15) 0.0380(18) -0.0017(13) 0.0201(14) -0.0015(12)
C07 0.0275(16) 0.0188(16) 0.0330(17) 0.0002(12) 0.0165(14) 0.0036(13)
C16 0.0297(17) 0.0229(16) 0.0380(19) -0.0030(13) 0.0210(15) -0.0013(13)
C12 0.0379(19) 0.0221(16) 0.047(2) -0.0036(14) 0.0276(17) -0.0060(14)
C19 0.0358(19) 0.0346(19) 0.044(2) -0.0117(15) 0.0280(17) -0.0043(15)
C10 0.0290(17) 0.0278(18) 0.048(2) -0.0031(14) 0.0245(16) 0.0008(14)
C03 0.0294(18) 0.044(2) 0.065(2) -0.0045(17) 0.0323(18) -0.0033(16)
C11 0.0317(18) 0.0308(19) 0.057(2) -0.0054(15) 0.0299(18) -0.0059(15)
C04 0.0348(19) 0.034(2) 0.060(2) -0.0030(16) 0.0296(18) -0.0086(15)
C05 0.0327(18) 0.0249(17) 0.047(2) -0.0031(14) 0.0238(16) 0.0004(14)
C17 0.0290(17) 0.0330(19) 0.0374(19) 0.0049(14) 0.0171(15) 0.0027(14)
C18 0.0298(18) 0.042(2) 0.0365(19) -0.0040(15) 0.0205(16) -0.0027(15)
B1 0.0276(18) 0.0153(17) 0.038(2) 0.0009(14) 0.0200(17) 0.0040(14)
 
_geom_special_details
;
 All s.u.'s (except the s.u. in the dihedral angle between two l.s. planes)
 are estimated using the full covariance matrix.  The cell s.u.'s are taken
 into account individually in the estimation of s.u.'s in distances, angles
 and torsion angles; correlations between s.u.'s in cell parameters are only
 used when they are defined by crystal symmetry.  An approximate (isotropic)
 treatment of cell s.u.'s is used for estimating s.u.'s involving l.s. planes.
;
 
loop_
 _geom_bond_atom_site_label_1
 _geom_bond_atom_site_label_2
 _geom_bond_distance
 _geom_bond_site_symmetry_2
 _geom_bond_publ_flag
O2 C14 1.321(3) . ?
O2 B1 1.474(4) . ?
O1 C01 1.342(3) . ?
O1 B1 1.469(4) . ?
C08 C09 1.383(4) . ?
C08 C13 1.397(4) . ?
C08 N1 1.434(3) . ?
N1 C07 1.298(3) . ?
N1 B1 1.583(4) . ?
O3 C14 1.216(3) . ?
C06 C05 1.403(4) . ?
C06 C01 1.410(4) . ?
C06 C07 1.429(4) . ?
C13 C12 1.389(4) . ?
C13 C14 1.491(4) . ?
C20 C19 1.383(4) . ?
C20 C15 1.402(4) . ?
C20 H20 0.9300 . ?
C09 C10 1.389(4) . ?
C09 H09 0.9300 . ?
C01 C02 1.390(4) . ?
C02 C03 1.372(4) . ?
C02 H02 0.9300 . ?
C15 C16 1.389(4) . ?
C15 B1 1.597(4) . ?
C07 H07 0.9300 . ?
C16 C17 1.384(4) . ?
C16 H16 0.9300 . ?
C12 C11 1.375(4) . ?
C12 H12 0.9300 . ?
C19 C18 1.378(4) . ?
C19 H19 0.9300 . ?
C10 C11 1.379(4) . ?
C10 H10 0.9300 . ?
C03 C04 1.389(4) . ?
C03 H03 0.9300 . ?
C11 H11 0.9300 . ?
C04 C05 1.373(4) . ?
C04 H04 0.9300 . ?
C05 H05 0.9300 . ?
C17 C18 1.374(4) . ?
C17 H17 0.9300 . ?
C18 H18 0.9300 . ?
 
loop_
 _geom_angle_atom_site_label_1
 _geom_angle_atom_site_label_2
 _geom_angle_atom_site_label_3
 _geom_angle
 _geom_angle_site_symmetry_1
 _geom_angle_site_symmetry_3
 _geom_angle_publ_flag
C14 O2 B1 121.9(2) . . ?
C01 O1 B1 119.2(2) . . ?
C09 C08 C13 120.9(3) . . ?
C09 C08 N1 122.3(2) . . ?
C13 C08 N1 116.7(2) . . ?
C07 N1 C08 123.3(2) . . ?
C07 N1 B1 120.7(2) . . ?
C08 N1 B1 115.5(2) . . ?
C05 C06 C01 120.0(3) . . ?
C05 C06 C07 120.4(3) . . ?
C01 C06 C07 119.6(3) . . ?
C12 C13 C08 118.4(3) . . ?
C12 C13 C14 119.1(3) . . ?
C08 C13 C14 122.5(3) . . ?
C19 C20 C15 121.6(3) . . ?
C19 C20 H20 119.2 . . ?
C15 C20 H20 119.2 . . ?
O3 C14 O2 120.9(3) . . ?
O3 C14 C13 121.4(3) . . ?
O2 C14 C13 117.7(2) . . ?
C08 C09 C10 119.3(3) . . ?
C08 C09 H09 120.4 . . ?
C10 C09 H09 120.4 . . ?
O1 C01 C02 120.5(3) . . ?
O1 C01 C06 120.3(3) . . ?
C02 C01 C06 119.1(3) . . ?
C03 C02 C01 119.6(3) . . ?
C03 C02 H02 120.2 . . ?
C01 C02 H02 120.2 . . ?
C16 C15 C20 116.3(3) . . ?
C16 C15 B1 124.3(2) . . ?
C20 C15 B1 119.4(2) . . ?
N1 C07 C06 120.4(3) . . ?
N1 C07 H07 119.8 . . ?
C06 C07 H07 119.8 . . ?
C17 C16 C15 122.4(3) . . ?
C17 C16 H16 118.8 . . ?
C15 C16 H16 118.8 . . ?
C11 C12 C13 121.1(3) . . ?
C11 C12 H12 119.5 . . ?
C13 C12 H12 119.5 . . ?
C18 C19 C20 120.3(3) . . ?
C18 C19 H19 119.9 . . ?
C20 C19 H19 119.9 . . ?
C11 C10 C09 120.4(3) . . ?
C11 C10 H10 119.8 . . ?
C09 C10 H10 119.8 . . ?
C02 C03 C04 122.0(3) . . ?
C02 C03 H03 119.0 . . ?
C04 C03 H03 119.0 . . ?
C12 C11 C10 120.0(3) . . ?
C12 C11 H11 120.0 . . ?
C10 C11 H11 120.0 . . ?
C05 C04 C03 119.2(3) . . ?
C05 C04 H04 120.4 . . ?
C03 C04 H04 120.4 . . ?
C04 C05 C06 120.0(3) . . ?
C04 C05 H05 120.0 . . ?
C06 C05 H05 120.0 . . ?
C18 C17 C16 119.8(3) . . ?
C18 C17 H17 120.1 . . ?
C16 C17 H17 120.1 . . ?
C17 C18 C19 119.6(3) . . ?
C17 C18 H18 120.2 . . ?
C19 C18 H18 120.2 . . ?
O1 B1 O2 105.3(2) . . ?
O1 B1 N1 108.9(2) . . ?
O2 B1 N1 107.9(2) . . ?
O1 B1 C15 112.2(2) . . ?
O2 B1 C15 112.3(2) . . ?
N1 B1 C15 110.1(2) . . ?
 
loop_
 _geom_torsion_atom_site_label_1
 _geom_torsion_atom_site_label_2
 _geom_torsion_atom_site_label_3
 _geom_torsion_atom_site_label_4
 _geom_torsion
 _geom_torsion_site_symmetry_1
 _geom_torsion_site_symmetry_2
 _geom_torsion_site_symmetry_3
 _geom_torsion_site_symmetry_4
 _geom_torsion_publ_flag
C09 C08 N1 C07 -21.9(4) . . . . ?
C13 C08 N1 C07 160.7(3) . . . . ?
C09 C08 N1 B1 151.1(3) . . . . ?
C13 C08 N1 B1 -26.4(4) . . . . ?
C09 C08 C13 C12 0.8(4) . . . . ?
N1 C08 C13 C12 178.3(3) . . . . ?
C09 C08 C13 C14 179.5(3) . . . . ?
N1 C08 C13 C14 -3.1(4) . . . . ?
B1 O2 C14 O3 -166.3(3) . . . . ?
B1 O2 C14 C13 15.6(4) . . . . ?
C12 C13 C14 O3 10.9(4) . . . . ?
C08 C13 C14 O3 -167.8(3) . . . . ?
C12 C13 C14 O2 -171.0(3) . . . . ?
C08 C13 C14 O2 10.4(4) . . . . ?
C13 C08 C09 C10 -0.5(4) . . . . ?
N1 C08 C09 C10 -177.8(3) . . . . ?
B1 O1 C01 C02 155.2(3) . . . . ?
B1 O1 C01 C06 -27.5(4) . . . . ?
C05 C06 C01 O1 -177.4(3) . . . . ?
C07 C06 C01 O1 0.6(4) . . . . ?
C05 C06 C01 C02 -0.1(4) . . . . ?
C07 C06 C01 C02 178.0(3) . . . . ?
O1 C01 C02 C03 179.4(3) . . . . ?
C06 C01 C02 C03 2.0(5) . . . . ?
C19 C20 C15 C16 -0.3(4) . . . . ?
C19 C20 C15 B1 177.2(3) . . . . ?
C08 N1 C07 C06 175.7(3) . . . . ?
B1 N1 C07 C06 3.1(4) . . . . ?
C05 C06 C07 N1 -170.6(3) . . . . ?
C01 C06 C07 N1 11.4(4) . . . . ?
C20 C15 C16 C17 0.5(4) . . . . ?
B1 C15 C16 C17 -176.8(3) . . . . ?
C08 C13 C12 C11 -0.3(4) . . . . ?
C14 C13 C12 C11 -179.0(3) . . . . ?
C15 C20 C19 C18 -0.1(4) . . . . ?
C08 C09 C10 C11 -0.3(5) . . . . ?
C01 C02 C03 C04 -1.8(5) . . . . ?
C13 C12 C11 C10 -0.5(5) . . . . ?
C09 C10 C11 C12 0.8(5) . . . . ?
C02 C03 C04 C05 -0.4(5) . . . . ?
C03 C04 C05 C06 2.3(5) . . . . ?
C01 C06 C05 C04 -2.1(5) . . . . ?
C07 C06 C05 C04 179.9(3) . . . . ?
C15 C16 C17 C18 -0.4(4) . . . . ?
C16 C17 C18 C19 0.0(4) . . . . ?
C20 C19 C18 C17 0.2(4) . . . . ?
C01 O1 B1 O2 153.5(2) . . . . ?
C01 O1 B1 N1 38.1(3) . . . . ?
C01 O1 B1 C15 -84.1(3) . . . . ?
C14 O2 B1 O1 -158.1(2) . . . . ?
C14 O2 B1 N1 -42.0(4) . . . . ?
C14 O2 B1 C15 79.5(3) . . . . ?
C07 N1 B1 O1 -26.3(4) . . . . ?
C08 N1 B1 O1 160.6(2) . . . . ?
C07 N1 B1 O2 -140.0(2) . . . . ?
C08 N1 B1 O2 46.9(3) . . . . ?
C07 N1 B1 C15 97.2(3) . . . . ?
C08 N1 B1 C15 -76.0(3) . . . . ?
C16 C15 B1 O1 104.3(3) . . . . ?
C20 C15 B1 O1 -72.9(3) . . . . ?
C16 C15 B1 O2 -137.4(3) . . . . ?
C20 C15 B1 O2 45.4(3) . . . . ?
C16 C15 B1 N1 -17.2(4) . . . . ?
C20 C15 B1 N1 165.6(2) . . . . ?
 
_diffrn_measured_fraction_theta_max    0.972
_diffrn_reflns_theta_full              25.38
_diffrn_measured_fraction_theta_full   0.972
_refine_diff_density_max    0.277
_refine_diff_density_min   -0.274
_refine_diff_density_rms    0.050
