# Supplementary material for: Multicomponent Synthesis of Luminescent Iminoboronates
Source: Molecules. 2020 Dec 21;25(24):6039. doi: 10.3390/molecules25246039 (PMC7766465; doi:10.3390/molecules25246039)
Supplement: Supplementary file 1 [file molecules-25-06039-s001.zip › 1d.cif]

 
data_shelx
 
_audit_creation_method            SHELXL-2014
_chemical_name_systematic
;
10,12-dihydroxy-7-phenyl-5H,7H-7l4,14l4-benzo[d]benzo[5,6][1,3,2]oxazaborinino[2,3-b][1,3,2]oxazaborinin-5-one
;
_chemical_name_common             ?
_chemical_melting_point           ?
_chemical_formula_moiety          'C20 H14 B N O5, C H4 O'
_chemical_formula_sum
 'C21 H18 B N O6' 
_chemical_formula_weight          391.17

loop_
 _atom_type_symbol
 _atom_type_description
 _atom_type_scat_dispersion_real
 _atom_type_scat_dispersion_imag
 _atom_type_scat_source
 'C'  'C'   0.0033   0.0016
 'International Tables Vol C Tables 4.2.6.8 and 6.1.1.4'
 'H'  'H'   0.0000   0.0000
 'International Tables Vol C Tables 4.2.6.8 and 6.1.1.4'
 'B'  'B'   0.0013   0.0007
 'International Tables Vol C Tables 4.2.6.8 and 6.1.1.4'
 'N'  'N'   0.0061   0.0033
 'International Tables Vol C Tables 4.2.6.8 and 6.1.1.4'
 'O'  'O'   0.0106   0.0060
 'International Tables Vol C Tables 4.2.6.8 and 6.1.1.4'
 
_space_group_crystal_system       monoclinic
_space_group_IT_number            14
_space_group_name_H-M_alt         'P 21/c'
_space_group_name_Hall            '-P 2ybc'
 
_shelx_space_group_comment
;
The symmetry employed for this shelxl refinement is uniquely defined
by the following loop, which should always be used as a source of
symmetry information in preference to the above space-group names.
They are only intended as comments.
;
 
loop_
 _space_group_symop_operation_xyz
 'x, y, z'
 '-x, y+1/2, -z+1/2'
 '-x, -y, -z'
 'x, -y-1/2, z-1/2'
 
_cell_length_a                    11.1926(5)
_cell_length_b                    10.5497(5)
_cell_length_c                    15.8352(8)
_cell_angle_alpha                 90
_cell_angle_beta                  91.214(2)
_cell_angle_gamma                 90
_cell_volume                      1869.38(15)
_cell_formula_units_Z             4
_cell_measurement_temperature     150(2)
_cell_measurement_reflns_used     6758 
_cell_measurement_theta_min       2.57 
_cell_measurement_theta_max       26.34
 
_exptl_crystal_description        flake 
_exptl_crystal_colour             green 
_exptl_crystal_density_meas       ? 
_exptl_crystal_density_method     ?              
_exptl_crystal_density_diffrn     1.390          
_exptl_crystal_F_000              816
_exptl_transmission_factor_min    0.7011                                             
_exptl_transmission_factor_max    0.7454                                             
_exptl_crystal_size_max           0.120
_exptl_crystal_size_mid           0.100
_exptl_crystal_size_min           0.020
_exptl_absorpt_coefficient_mu     0.101
_shelx_estimated_absorpt_T_min    0.988
_shelx_estimated_absorpt_T_max    0.998
_exptl_absorpt_correction_type    multi-scan 
_exptl_absorpt_correction_T_min   ? 
_exptl_absorpt_correction_T_max   ? 
_exptl_absorpt_process_details    '(SADABS; Bruker, 2008)'
 
_exptl_special_details
;
 ?
;
 
_diffrn_ambient_temperature       150(2)
_diffrn_radiation_wavelength      0.71073
_diffrn_radiation_type            MoK\a
_diffrn_source                    'fine-focus sealed tube'                       
_diffrn_measurement_device_type   "ccd" 
_diffrn_measurement_method        "omega and phi scans"
_diffrn_detector_area_resol_mean  ? 
_diffrn_reflns_number             16120
_diffrn_reflns_av_unetI/netI      0.0255
_diffrn_reflns_av_R_equivalents   0.0309
_diffrn_reflns_limit_h_min        -13
_diffrn_reflns_limit_h_max        13
_diffrn_reflns_limit_k_min        -13
_diffrn_reflns_limit_k_max        13
_diffrn_reflns_limit_l_min        -19
_diffrn_reflns_limit_l_max        19
_diffrn_reflns_theta_min          2.320
_diffrn_reflns_theta_max          26.385
_diffrn_reflns_theta_full         25.242
_diffrn_measured_fraction_theta_max   0.996
_diffrn_measured_fraction_theta_full  0.999
_diffrn_reflns_Laue_measured_fraction_max    0.996
_diffrn_reflns_Laue_measured_fraction_full   0.999
_diffrn_reflns_point_group_measured_fraction_max   0.996
_diffrn_reflns_point_group_measured_fraction_full  0.999
_reflns_number_total              3806
_reflns_number_gt                 3170
_reflns_threshold_expression      'I > 2\s(I)'
_reflns_Friedel_coverage          0.000
_reflns_Friedel_fraction_max      .
_reflns_Friedel_fraction_full     .
 
_reflns_special_details
;
 Reflections were merged by SHELXL according to the crystal
 class for the calculation of statistics and refinement.
 
 _reflns_Friedel_fraction is defined as the number of unique
 Friedel pairs measured divided by the number that would be
 possible theoretically, ignoring centric projections and
 systematic absences.
;
 
_computing_data_collection        'Bruker SMART'
_computing_cell_refinement        'Bruker SMART'
_computing_data_reduction         'Bruker SAINT'
_computing_structure_solution     'SHELXL-2014 (Sheldrick, 2014)'
_computing_structure_refinement   'SHELXL-2014 (Sheldrick, 2014)'
_computing_molecular_graphics     'PLATON (Spek, 2009)'
_computing_publication_material   'SHELXL-2014 (Sheldrick, 2014)'
 
_refine_special_details
;
 ?
;
_refine_ls_structure_factor_coef  Fsqd
_refine_ls_matrix_type            full
_refine_ls_weighting_scheme       calc
_refine_ls_weighting_details
'w=1/[\s^2^(Fo^2^)+(0.0472P)^2^+1.3680P] where P=(Fo^2^+2Fc^2^)/3'
_atom_sites_solution_primary      ?
_atom_sites_solution_secondary    ?
_atom_sites_solution_hydrogens    geom
_refine_ls_hydrogen_treatment     mixed
_refine_ls_extinction_method      none
_refine_ls_extinction_coef        .
_refine_ls_number_reflns          3806
_refine_ls_number_parameters      269
_refine_ls_number_restraints      0
_refine_ls_R_factor_all           0.0533
_refine_ls_R_factor_gt            0.0418
_refine_ls_wR_factor_ref          0.1203
_refine_ls_wR_factor_gt           0.1140
_refine_ls_goodness_of_fit_ref    1.098
_refine_ls_restrained_S_all       1.098
_refine_ls_shift/su_max           0.000
_refine_ls_shift/su_mean          0.000
 
loop_
 _atom_site_label
 _atom_site_type_symbol
 _atom_site_fract_x
 _atom_site_fract_y
 _atom_site_fract_z
 _atom_site_U_iso_or_equiv
 _atom_site_adp_type
 _atom_site_occupancy
 _atom_site_site_symmetry_order  
 _atom_site_calc_flag
 _atom_site_refinement_flags_posn
 _atom_site_refinement_flags_adp
 _atom_site_refinement_flags_occupancy
 _atom_site_disorder_assembly
 _atom_site_disorder_group
C17 C 0.72231(18) 0.73387(19) -0.10913(12) 0.0291(4) Uani 1 1 d . . . . .
H17 H 0.6774 0.6950 -0.1536 0.035 Uiso 1 1 calc R U . . .
C19 C 0.90219(19) 0.8307(2) -0.05743(14) 0.0390(5) Uani 1 1 d . . . . .
H19 H 0.9817 0.8585 -0.0664 0.047 Uiso 1 1 calc R U . . .
C20 C 0.85070(17) 0.84850(19) 0.02112(12) 0.0277(4) Uani 1 1 d . . . . .
H20 H 0.8960 0.8883 0.0651 0.033 Uiso 1 1 calc R U . . .
C21 C 1.1058(2) 1.0192(2) 0.40571(14) 0.0433(6) Uani 1 1 d . . . . .
H21A H 1.1714 0.9586 0.4139 0.065 Uiso 1 1 calc R U . . .
H21B H 1.0294 0.9736 0.4046 0.065 Uiso 1 1 calc R U . . .
H21C H 1.1068 1.0804 0.4523 0.065 Uiso 1 1 calc R U . . .
N01 N 0.55806(12) 0.90044(13) 0.12733(8) 0.0164(3) Uani 1 1 d . . . . .
O01 O 0.76231(10) 0.88414(11) 0.18873(8) 0.0199(3) Uani 1 1 d . . . . .
O05 O 0.65425(11) 0.69756(11) 0.16718(7) 0.0203(3) Uani 1 1 d . . . . .
O02 O 0.95704(12) 1.25858(13) 0.28386(9) 0.0283(3) Uani 1 1 d . . . . .
H001 H 1.0128(19) 1.2009(17) 0.3011(14) 0.042 Uiso 1 1 calc R U . . .
C13 C 0.44919(16) 0.70345(16) 0.11894(11) 0.0209(4) Uani 1 1 d . . . . .
O04 O 0.54489(13) 0.52649(12) 0.18282(9) 0.0330(3) Uani 1 1 d . . . . .
C06 C 0.66536(15) 1.08381(15) 0.17067(10) 0.0179(3) Uani 1 1 d . . . . .
C05 C 0.66899(16) 1.21686(16) 0.18421(11) 0.0213(4) Uani 1 1 d . . . . .
C12 C 0.34642(17) 0.63485(18) 0.09720(12) 0.0272(4) Uani 1 1 d . . . . .
H12 H 0.3448 0.5458 0.1059 0.033 Uiso 1 1 calc R U . . .
O06 O 1.11973(13) 1.08442(13) 0.32792(9) 0.0310(3) Uani 1 1 d . . . . .
H003 H 1.197(2) 1.116(2) 0.3253(7) 0.046 Uiso 1 1 calc R U . . .
C04 C 0.76732(16) 1.27372(16) 0.22067(11) 0.0228(4) Uani 1 1 d . . . . .
H04 H 0.7695 1.3630 0.2286 0.027 Uiso 1 1 calc R U . . .
C02 C 0.86518(15) 1.06662(17) 0.23388(11) 0.0212(4) Uani 1 1 d . . . . .
H02 H 0.9323 1.0171 0.2510 0.025 Uiso 1 1 calc R U . . .
C03 C 0.86457(15) 1.19822(17) 0.24606(11) 0.0214(4) Uani 1 1 d . . . . .
C07 C 0.56012(15) 1.02266(15) 0.14351(10) 0.0177(3) Uani 1 1 d . . . . .
H07 H 0.4887 1.0706 0.1366 0.021 Uiso 1 1 calc R U . . .
O03 O 0.56866(12) 1.28004(13) 0.15988(10) 0.0325(3) Uani 1 1 d . . . . .
H002 H 0.5772(9) 1.360(3) 0.1711(15) 0.049 Uiso 1 1 calc R U . . .
C09 C 0.35065(16) 0.89548(17) 0.07095(12) 0.0248(4) Uani 1 1 d . . . . .
H09 H 0.3515 0.9844 0.0617 0.030 Uiso 1 1 calc R U . . .
C14 C 0.55267(16) 0.63585(16) 0.15809(11) 0.0212(4) Uani 1 1 d . . . . .
C01 C 0.76628(15) 1.01074(16) 0.19651(10) 0.0175(3) Uani 1 1 d . . . . .
C08 C 0.45101(15) 0.83507(16) 0.10545(10) 0.0182(3) Uani 1 1 d . . . . .
C15 C 0.73452(15) 0.80923(15) 0.03661(10) 0.0187(3) Uani 1 1 d . . . . .
C021 C 0.24722(18) 0.6952(2) 0.06318(13) 0.0318(4) Uani 1 1 d . . . . .
H11 H 0.1775 0.6479 0.0487 0.038 Uiso 1 1 calc R U . . .
C16 C 0.67154(16) 0.75142(17) -0.03085(11) 0.0227(4) Uani 1 1 d . . . . .
H16 H 0.5919 0.7236 -0.0226 0.027 Uiso 1 1 calc R U . . .
C10 C 0.24959(17) 0.8252(2) 0.05021(12) 0.0308(4) Uani 1 1 d . . . . .
H10 H 0.1811 0.8665 0.0268 0.037 Uiso 1 1 calc R U . . .
B01 B 0.67889(17) 0.82492(17) 0.12901(12) 0.0171(4) Uani 1 1 d . . . . .
C18 C 0.83813(19) 0.7728(2) -0.12235(13) 0.0369(5) Uani 1 1 d . . . . .
H18 H 0.8736 0.7600 -0.1756 0.044 Uiso 1 1 calc R U . . .
 
loop_
 _atom_site_aniso_label
 _atom_site_aniso_U_11
 _atom_site_aniso_U_22
 _atom_site_aniso_U_33
 _atom_site_aniso_U_23
 _atom_site_aniso_U_13
 _atom_site_aniso_U_12
C17 0.0321(10) 0.0351(10) 0.0200(9) -0.0020(8) -0.0010(7) 0.0037(8)
C19 0.0254(10) 0.0588(14) 0.0331(11) 0.0038(10) 0.0081(8) -0.0064(10)
C20 0.0247(9) 0.0325(10) 0.0258(10) 0.0018(8) 0.0000(7) -0.0031(8)
C21 0.0597(15) 0.0341(12) 0.0361(12) 0.0043(9) 0.0048(10) -0.0051(11)
N01 0.0188(7) 0.0137(6) 0.0166(7) 0.0006(5) -0.0011(5) -0.0002(5)
O01 0.0222(6) 0.0155(6) 0.0217(6) -0.0015(5) -0.0055(5) 0.0036(5)
O05 0.0242(6) 0.0140(6) 0.0227(6) 0.0033(5) 0.0017(5) 0.0026(5)
O02 0.0212(6) 0.0273(7) 0.0362(8) -0.0061(6) -0.0036(5) -0.0068(6)
C13 0.0253(9) 0.0181(8) 0.0195(8) -0.0034(7) 0.0047(7) -0.0031(7)
O04 0.0393(8) 0.0130(6) 0.0472(9) 0.0044(6) 0.0110(6) 0.0010(6)
C06 0.0191(8) 0.0156(8) 0.0190(8) 0.0002(6) -0.0010(6) -0.0010(6)
C05 0.0229(9) 0.0166(8) 0.0244(9) 0.0011(7) -0.0010(7) 0.0013(7)
C12 0.0318(10) 0.0207(9) 0.0296(10) -0.0058(7) 0.0067(8) -0.0082(8)
O06 0.0269(7) 0.0310(7) 0.0349(8) 0.0046(6) -0.0040(6) -0.0085(6)
C04 0.0269(9) 0.0146(8) 0.0268(9) -0.0006(7) 0.0011(7) -0.0033(7)
C02 0.0177(8) 0.0237(9) 0.0220(9) -0.0022(7) -0.0016(6) 0.0020(7)
C03 0.0192(8) 0.0256(9) 0.0196(8) -0.0024(7) 0.0022(6) -0.0064(7)
C07 0.0194(8) 0.0153(8) 0.0182(8) 0.0011(6) -0.0008(6) 0.0017(6)
O03 0.0302(7) 0.0127(6) 0.0539(9) -0.0030(6) -0.0148(6) 0.0034(5)
C09 0.0250(9) 0.0221(9) 0.0269(9) 0.0021(7) -0.0042(7) -0.0020(7)
C14 0.0275(9) 0.0141(8) 0.0223(9) -0.0024(6) 0.0078(7) -0.0003(7)
C01 0.0209(8) 0.0158(8) 0.0157(8) -0.0002(6) 0.0016(6) -0.0002(7)
C08 0.0198(8) 0.0186(8) 0.0163(8) -0.0012(6) 0.0014(6) -0.0041(7)
C15 0.0211(8) 0.0153(8) 0.0197(8) 0.0033(6) -0.0005(6) 0.0042(7)
C021 0.0282(10) 0.0352(11) 0.0319(10) -0.0077(8) -0.0009(8) -0.0133(9)
C16 0.0232(9) 0.0240(9) 0.0209(9) -0.0001(7) -0.0004(7) 0.0011(7)
C10 0.0233(9) 0.0381(11) 0.0306(10) 0.0008(8) -0.0068(8) -0.0042(8)
B01 0.0189(9) 0.0128(8) 0.0195(9) 0.0014(7) -0.0013(7) 0.0007(7)
C18 0.0347(11) 0.0539(13) 0.0224(10) 0.0016(9) 0.0099(8) 0.0033(10)
 
_geom_special_details
;
 All esds (except the esd in the dihedral angle between two l.s. planes)
 are estimated using the full covariance matrix.  The cell esds are taken
 into account individually in the estimation of esds in distances, angles
 and torsion angles; correlations between esds in cell parameters are only
 used when they are defined by crystal symmetry.  An approximate (isotropic)
 treatment of cell esds is used for estimating esds involving l.s. planes.
;
 
loop_
 _geom_bond_atom_site_label_1
 _geom_bond_atom_site_label_2
 _geom_bond_distance
 _geom_bond_site_symmetry_2
 _geom_bond_publ_flag
C17 C18 1.380(3) . ?
C17 C16 1.387(3) . ?
C17 H17 0.9500 . ?
C19 C18 1.383(3) . ?
C19 C20 1.395(3) . ?
C19 H19 0.9500 . ?
C20 C15 1.392(2) . ?
C20 H20 0.9500 . ?
C21 O06 1.423(3) . ?
C21 H21A 0.9800 . ?
C21 H21B 0.9800 . ?
C21 H21C 0.9800 . ?
N01 C07 1.315(2) . ?
N01 C08 1.419(2) . ?
N01 B01 1.569(2) . ?
O01 C01 1.342(2) . ?
O01 B01 1.456(2) . ?
O05 C14 1.315(2) . ?
O05 B01 1.501(2) . ?
O02 C03 1.345(2) . ?
O02 H001 0.91(3) . ?
C13 C12 1.396(3) . ?
C13 C08 1.405(2) . ?
C13 C14 1.485(3) . ?
O04 C14 1.222(2) . ?
C06 C07 1.403(2) . ?
C06 C05 1.420(2) . ?
C06 C01 1.421(2) . ?
C05 O03 1.355(2) . ?
C05 C04 1.370(2) . ?
C12 C021 1.380(3) . ?
C12 H12 0.9500 . ?
O06 H003 0.93(3) . ?
C04 C03 1.401(3) . ?
C04 H04 0.9500 . ?
C02 C01 1.377(2) . ?
C02 C03 1.402(2) . ?
C02 H02 0.9500 . ?
C07 H07 0.9500 . ?
O03 H002 0.87(3) . ?
C09 C10 1.386(3) . ?
C09 C08 1.393(2) . ?
C09 H09 0.9500 . ?
C15 C16 1.407(2) . ?
C15 B01 1.611(2) . ?
C021 C10 1.387(3) . ?
C021 H11 0.9500 . ?
C16 H16 0.9500 . ?
C10 H10 0.9500 . ?
C18 H18 0.9500 . ?
 
loop_
 _geom_angle_atom_site_label_1
 _geom_angle_atom_site_label_2
 _geom_angle_atom_site_label_3
 _geom_angle
 _geom_angle_site_symmetry_1
 _geom_angle_site_symmetry_3
 _geom_angle_publ_flag
C18 C17 C16 119.99(18) . . ?
C18 C17 H17 120.0 . . ?
C16 C17 H17 120.0 . . ?
C18 C19 C20 120.32(19) . . ?
C18 C19 H19 119.8 . . ?
C20 C19 H19 119.8 . . ?
C15 C20 C19 121.50(18) . . ?
C15 C20 H20 119.2 . . ?
C19 C20 H20 119.2 . . ?
O06 C21 H21A 109.5 . . ?
O06 C21 H21B 109.5 . . ?
H21A C21 H21B 109.5 . . ?
O06 C21 H21C 109.5 . . ?
H21A C21 H21C 109.5 . . ?
H21B C21 H21C 109.5 . . ?
C07 N01 C08 122.38(14) . . ?
C07 N01 B01 118.88(14) . . ?
C08 N01 B01 118.70(13) . . ?
C01 O01 B01 120.42(13) . . ?
C14 O05 B01 124.38(13) . . ?
C03 O02 H001 109.5 . . ?
C12 C13 C08 119.30(17) . . ?
C12 C13 C14 119.04(16) . . ?
C08 C13 C14 121.63(15) . . ?
C07 C06 C05 121.47(15) . . ?
C07 C06 C01 119.75(15) . . ?
C05 C06 C01 118.21(15) . . ?
O03 C05 C04 123.92(16) . . ?
O03 C05 C06 114.98(15) . . ?
C04 C05 C06 121.09(16) . . ?
C021 C12 C13 120.60(17) . . ?
C021 C12 H12 119.7 . . ?
C13 C12 H12 119.7 . . ?
C21 O06 H003 109.5 . . ?
C05 C04 C03 118.97(16) . . ?
C05 C04 H04 120.5 . . ?
C03 C04 H04 120.5 . . ?
C01 C02 C03 118.50(16) . . ?
C01 C02 H02 120.8 . . ?
C03 C02 H02 120.8 . . ?
O02 C03 C04 116.39(16) . . ?
O02 C03 C02 121.62(16) . . ?
C04 C03 C02 121.98(16) . . ?
N01 C07 C06 121.47(15) . . ?
N01 C07 H07 119.3 . . ?
C06 C07 H07 119.3 . . ?
C05 O03 H002 109.5 . . ?
C10 C09 C08 119.69(17) . . ?
C10 C09 H09 120.2 . . ?
C08 C09 H09 120.2 . . ?
O04 C14 O05 119.96(17) . . ?
O04 C14 C13 121.81(17) . . ?
O05 C14 C13 118.22(14) . . ?
O01 C01 C02 119.37(15) . . ?
O01 C01 C06 119.28(15) . . ?
C02 C01 C06 121.24(15) . . ?
C09 C08 C13 119.84(16) . . ?
C09 C08 N01 122.89(15) . . ?
C13 C08 N01 117.26(15) . . ?
C20 C15 C16 116.77(16) . . ?
C20 C15 B01 120.67(16) . . ?
C16 C15 B01 122.51(15) . . ?
C12 C021 C10 119.77(18) . . ?
C12 C021 H11 120.1 . . ?
C10 C021 H11 120.1 . . ?
C17 C16 C15 121.90(17) . . ?
C17 C16 H16 119.0 . . ?
C15 C16 H16 119.0 . . ?
C09 C10 C021 120.79(18) . . ?
C09 C10 H10 119.6 . . ?
C021 C10 H10 119.6 . . ?
O01 B01 O05 104.09(13) . . ?
O01 B01 N01 109.50(13) . . ?
O05 B01 N01 107.19(13) . . ?
O01 B01 C15 112.29(14) . . ?
O05 B01 C15 110.58(13) . . ?
N01 B01 C15 112.72(13) . . ?
C17 C18 C19 119.51(18) . . ?
C17 C18 H18 120.2 . . ?
C19 C18 H18 120.2 . . ?
 
loop_
 _geom_torsion_atom_site_label_1
 _geom_torsion_atom_site_label_2
 _geom_torsion_atom_site_label_3
 _geom_torsion_atom_site_label_4
 _geom_torsion
 _geom_torsion_site_symmetry_1
 _geom_torsion_site_symmetry_2
 _geom_torsion_site_symmetry_3
 _geom_torsion_site_symmetry_4
 _geom_torsion_publ_flag
C18 C19 C20 C15 -0.1(3) . . . . ?
C07 C06 C05 O03 -7.2(2) . . . . ?
C01 C06 C05 O03 -178.50(15) . . . . ?
C07 C06 C05 C04 171.76(16) . . . . ?
C01 C06 C05 C04 0.4(3) . . . . ?
C08 C13 C12 C021 -0.3(3) . . . . ?
C14 C13 C12 C021 177.93(16) . . . . ?
O03 C05 C04 C03 177.75(16) . . . . ?
C06 C05 C04 C03 -1.1(3) . . . . ?
C05 C04 C03 O02 -177.97(16) . . . . ?
C05 C04 C03 C02 1.2(3) . . . . ?
C01 C02 C03 O02 178.49(15) . . . . ?
C01 C02 C03 C04 -0.6(3) . . . . ?
C08 N01 C07 C06 175.54(15) . . . . ?
B01 N01 C07 C06 -6.7(2) . . . . ?
C05 C06 C07 N01 176.90(16) . . . . ?
C01 C06 C07 N01 -11.9(2) . . . . ?
B01 O05 C14 O04 171.35(16) . . . . ?
B01 O05 C14 C13 -9.8(2) . . . . ?
C12 C13 C14 O04 -10.6(3) . . . . ?
C08 C13 C14 O04 167.57(16) . . . . ?
C12 C13 C14 O05 170.52(15) . . . . ?
C08 C13 C14 O05 -11.3(2) . . . . ?
B01 O01 C01 C02 -161.70(15) . . . . ?
B01 O01 C01 C06 22.1(2) . . . . ?
C03 C02 C01 O01 -176.17(15) . . . . ?
C03 C02 C01 C06 0.0(2) . . . . ?
C07 C06 C01 O01 4.8(2) . . . . ?
C05 C06 C01 O01 176.28(15) . . . . ?
C07 C06 C01 C02 -171.33(16) . . . . ?
C05 C06 C01 C02 0.1(2) . . . . ?
C10 C09 C08 C13 0.0(3) . . . . ?
C10 C09 C08 N01 179.25(16) . . . . ?
C12 C13 C08 C09 0.2(2) . . . . ?
C14 C13 C08 C09 -177.99(15) . . . . ?
C12 C13 C08 N01 -179.06(15) . . . . ?
C14 C13 C08 N01 2.7(2) . . . . ?
C07 N01 C08 C09 23.1(2) . . . . ?
B01 N01 C08 C09 -154.65(16) . . . . ?
C07 N01 C08 C13 -157.69(15) . . . . ?
B01 N01 C08 C13 24.6(2) . . . . ?
C19 C20 C15 C16 -0.3(3) . . . . ?
C19 C20 C15 B01 177.19(18) . . . . ?
C13 C12 C021 C10 0.2(3) . . . . ?
C18 C17 C16 C15 0.4(3) . . . . ?
C20 C15 C16 C17 0.1(3) . . . . ?
B01 C15 C16 C17 -177.32(16) . . . . ?
C08 C09 C10 C021 -0.2(3) . . . . ?
C12 C021 C10 C09 0.1(3) . . . . ?
C01 O01 B01 O05 -151.72(13) . . . . ?
C01 O01 B01 N01 -37.38(19) . . . . ?
C01 O01 B01 C15 88.63(17) . . . . ?
C14 O05 B01 O01 149.12(14) . . . . ?
C14 O05 B01 N01 33.2(2) . . . . ?
C14 O05 B01 C15 -90.08(18) . . . . ?
C07 N01 B01 O01 29.7(2) . . . . ?
C08 N01 B01 O01 -152.52(13) . . . . ?
C07 N01 B01 O05 142.00(14) . . . . ?
C08 N01 B01 O05 -40.19(18) . . . . ?
C07 N01 B01 C15 -96.10(17) . . . . ?
C08 N01 B01 C15 81.71(18) . . . . ?
C20 C15 B01 O01 0.9(2) . . . . ?
C16 C15 B01 O01 178.27(14) . . . . ?
C20 C15 B01 O05 -114.86(18) . . . . ?
C16 C15 B01 O05 62.5(2) . . . . ?
C20 C15 B01 N01 125.17(17) . . . . ?
C16 C15 B01 N01 -57.5(2) . . . . ?
C16 C17 C18 C19 -0.8(3) . . . . ?
C20 C19 C18 C17 0.7(4) . . . . ?
 
loop_
 _geom_hbond_atom_site_label_D 
 _geom_hbond_atom_site_label_H 
 _geom_hbond_atom_site_label_A 
 _geom_hbond_distance_DH 
 _geom_hbond_distance_HA 
 _geom_hbond_distance_DA 
 _geom_hbond_angle_DHA 
 _geom_hbond_site_symmetry_A 
O02 H001 O06  0.91 1.76 2.669(2) 176.3 .
O06 H003 O05  0.93 1.88 2.7968(18) 171.3 2_755
C02 H02 O06  0.95 2.51 3.192(2) 129.2 .
O03 H002 O04  0.87 1.80 2.6394(18) 161.3 1_565
 
_refine_diff_density_max    0.364
_refine_diff_density_min   -0.206
_refine_diff_density_rms    0.049

_shelxl_version_number 2014-3

_shelx_res_file
;
TITL SG714 in P2(1)/c
CELL  0.71073  11.1926  10.5497  15.8352   90.000   91.214   90.000
ZERR     4.00   0.0005   0.0005   0.0008    0.000    0.002    0.000
LATT   1
SYMM  - X, 1/2 + Y, 1/2 - Z
SFAC  C    H    B    N    O
UNIT  84   72   4    4    24
MERG   2
HTAB O02 O06
EQIV $1 -x+2, y+1/2, -z+1/2
HTAB O06 O05_$1
HTAB C02 O06
EQIV $2 x, y+1, z
HTAB O03 O04_$2
FMAP   2
PLAN   20
SIZE     0.020   0.100   0.120
ACTA
BOND
BOND   $H
CONF
L.S.  99
TEMP  -123.00
WGHT    0.047200    1.368000
FVAR       0.16795
C17   1    0.722314    0.733874   -0.109127    11.00000    0.03208    0.03511 =
         0.01995   -0.00204   -0.00103    0.00369
AFIX  43
H17   2    0.677380    0.695043   -0.153637    11.00000   -1.20000
AFIX   0
C19   1    0.902189    0.830717   -0.057430    11.00000    0.02545    0.05877 =
         0.03310    0.00384    0.00811   -0.00641
AFIX  43
H19   2    0.981656    0.858503   -0.066387    11.00000   -1.20000
AFIX   0
C20   1    0.850700    0.848498    0.021121    11.00000    0.02466    0.03252 =
         0.02579    0.00180    0.00001   -0.00311
AFIX  43
H20   2    0.895977    0.888330    0.065057    11.00000   -1.20000
AFIX   0
C21   1    1.105753    1.019185    0.405711    11.00000    0.05966    0.03413 =
         0.03615    0.00429    0.00480   -0.00511
AFIX 137
H21A  2    1.171388    0.958631    0.413852    11.00000   -1.50000
H21B  2    1.029434    0.973620    0.404584    11.00000   -1.50000
H21C  2    1.106804    1.080369    0.452289    11.00000   -1.50000
AFIX   0
MOLE    1
N01   4    0.558057    0.900445    0.127325    11.00000    0.01881    0.01366 =
         0.01665    0.00062   -0.00108   -0.00016
O01   5    0.762307    0.884139    0.188729    11.00000    0.02223    0.01550 =
         0.02172   -0.00153   -0.00552    0.00361
O05   5    0.654250    0.697559    0.167177    11.00000    0.02415    0.01402 =
         0.02274    0.00330    0.00167    0.00262
O02   5    0.957040    1.258577    0.283865    11.00000    0.02121    0.02728 =
         0.03623   -0.00607   -0.00365   -0.00678
AFIX 148
H001  2    1.012794    1.200893    0.301081    11.00000   -1.50000
AFIX   0
C13   1    0.449186    0.703446    0.118938    11.00000    0.02533    0.01814 =
         0.01953   -0.00337    0.00472   -0.00308
O04   5    0.544890    0.526492    0.182824    11.00000    0.03933    0.01299 =
         0.04722    0.00439    0.01103    0.00103
C06   1    0.665361    1.083812    0.170669    11.00000    0.01907    0.01561 =
         0.01904    0.00017   -0.00101   -0.00100
C05   1    0.668992    1.216864    0.184214    11.00000    0.02295    0.01657 =
         0.02436    0.00114   -0.00103    0.00128
C12   1    0.346421    0.634851    0.097197    11.00000    0.03176    0.02066 =
         0.02956   -0.00579    0.00670   -0.00821
AFIX  43
H12   2    0.344775    0.545778    0.105906    11.00000   -1.20000
AFIX   0
O06   5    1.119734    1.084416    0.327916    11.00000    0.02688    0.03096 =
         0.03490    0.00465   -0.00398   -0.00854
AFIX 148
H003  2    1.196753    1.116107    0.325267    11.00000   -1.50000
AFIX   0
C04   1    0.767324    1.273720    0.220665    11.00000    0.02687    0.01460 =
         0.02681   -0.00061    0.00106   -0.00326
AFIX  43
H04   2    0.769520    1.362956    0.228592    11.00000   -1.20000
AFIX   0
C02   1    0.865181    1.066619    0.233875    11.00000    0.01774    0.02367 =
         0.02201   -0.00222   -0.00158    0.00197
AFIX  43
H02   2    0.932322    1.017112    0.251011    11.00000   -1.20000
AFIX   0
C03   1    0.864572    1.198217    0.246064    11.00000    0.01920    0.02557 =
         0.01965   -0.00242    0.00224   -0.00639
C07   1    0.560120    1.022656    0.143505    11.00000    0.01939    0.01530 =
         0.01823    0.00114   -0.00076    0.00169
AFIX  43
H07   2    0.488737    1.070621    0.136647    11.00000   -1.20000
AFIX   0
O03   5    0.568662    1.280042    0.159882    11.00000    0.03017    0.01268 =
         0.05387   -0.00302   -0.01477    0.00341
AFIX 148
H002  2    0.577217    1.360047    0.171084    11.00000   -1.50000
AFIX   0
C09   1    0.350648    0.895480    0.070951    11.00000    0.02502    0.02215 =
         0.02689    0.00211   -0.00422   -0.00198
AFIX  43
H09   2    0.351458    0.984442    0.061685    11.00000   -1.20000
AFIX   0
C14   1    0.552667    0.635853    0.158089    11.00000    0.02749    0.01409 =
         0.02228   -0.00242    0.00776   -0.00025
C01   1    0.766277    1.010736    0.196509    11.00000    0.02092    0.01579 =
         0.01570   -0.00025    0.00159   -0.00019
C08   1    0.451006    0.835070    0.105446    11.00000    0.01980    0.01856 =
         0.01626   -0.00124    0.00137   -0.00413
C15   1    0.734516    0.809226    0.036613    11.00000    0.02109    0.01529 =
         0.01970    0.00325   -0.00051    0.00421
C021  1    0.247222    0.695225    0.063178    11.00000    0.02824    0.03516 =
         0.03186   -0.00771   -0.00089   -0.01331
AFIX  43
H11   2    0.177529    0.647928    0.048688    11.00000   -1.20000
AFIX   0
C16   1    0.671539    0.751416   -0.030854    11.00000    0.02324    0.02402 =
         0.02095   -0.00006   -0.00042    0.00111
AFIX  43
H16   2    0.591922    0.723582   -0.022566    11.00000   -1.20000
AFIX   0
C10   1    0.249595    0.825189    0.050206    11.00000    0.02332    0.03811 =
         0.03059    0.00080   -0.00682   -0.00424
AFIX  43
H10   2    0.181140    0.866545    0.026822    11.00000   -1.20000
AFIX   0
B01   3    0.678894    0.824918    0.129013    11.00000    0.01886    0.01283 =
         0.01951    0.00141   -0.00133    0.00073
C18   1    0.838134    0.772839   -0.122347    11.00000    0.03468    0.05394 =
         0.02245    0.00164    0.00993    0.00335
AFIX  43
H18   2    0.873592    0.759993   -0.175649    11.00000   -1.20000
AFIX   0
HKLF    4

REM  SG714 in P2(1)/c
REM R1 =  0.0418 for    3170 Fo > 4sig(Fo)  and  0.0533 for all    3806 data
REM    269 parameters refined using      0 restraints

END

WGHT      0.0472      1.3680

REM Highest difference peak  0.364,  deepest hole -0.206,  1-sigma level  0.049
Q1    1   0.7018  0.8225  0.0802  11.00000  0.05    0.36
Q2    1   0.6184  0.8642  0.1288  11.00000  0.05    0.32
Q3    1   0.4967  0.6792  0.1384  11.00000  0.05    0.30
Q4    1   0.7186  1.0536  0.1735  11.00000  0.05    0.27
Q5    1   0.8026  1.2265  0.2434  11.00000  0.05    0.26
Q6    1   0.6645  1.1445  0.1890  11.00000  0.05    0.23
Q7    1   0.7154  0.7640  0.0107  11.00000  0.05    0.23
Q8    1   0.6972  0.7988  0.0052  11.00000  0.05    0.23
Q9    1   0.8364  1.0500  0.1920  11.00000  0.05    0.22
Q10   1   0.8635  1.1367  0.2385  11.00000  0.05    0.21
Q11   1   1.1045  0.9233  0.4007  11.00000  0.05    0.21
Q12   1   0.4541  0.7603  0.1094  11.00000  0.05    0.21
Q13   1   0.3922  0.6773  0.1173  11.00000  0.05    0.20
Q14   1   0.8093  1.0426  0.2368  11.00000  0.05    0.20
Q15   1   0.6219  1.0576  0.1576  11.00000  0.05    0.19
Q16   1   0.3899  0.8629  0.1145  11.00000  0.05    0.19
Q17   1   0.6179  0.4978  0.1916  11.00000  0.05    0.19
Q18   1   0.4187  0.6636  0.0920  11.00000  0.05    0.19
Q19   1   0.7929  0.7957  0.0308  11.00000  0.05    0.19
Q20   1   0.5050  0.8653  0.1142  11.00000  0.05    0.19
;
_shelx_res_checksum   77441

_shelx_hkl_file
;
   2   0   0  125.02    3.33
   2   0   0  140.18    3.31
  -2   0   0  140.14    3.31
   3   0   0   16.64    0.44
   3   0   0   16.81    0.44
  -3   0   0   16.74    0.44
   4   0   0   19.72    0.52
   4   0   0   20.14    0.53
  -4   0   0   20.32    0.53
   5   0   0   59.62    1.44
   5   0   0   56.94    1.44
  -5   0   0   57.08    1.44
   6   0   0   13.89    0.41
   6   0   0   14.69    0.41
  -6   0   0   14.67    0.42
   7   0   0   31.26    0.82
   7   0   0   32.12    0.82
  -7   0   0   31.67    0.82
  -8   0   0    0.29    0.13
   8   0   0    0.50    0.12
   8   0   0    0.37    0.13
  -9   0   0  199.81    4.85
   9   0   0  198.66    4.85
   9   0   0  198.83    4.85
  10   0   0  203.15    4.96
 -10   0   0  202.39    4.96
  10   0   0  204.59    4.96
  11   0   0    0.73    0.16
 -11   0   0    0.99    0.17
  11   0   0    0.88    0.14
  12   0   0    2.36    0.23
  12   0   0    2.52    0.27
 -12   0   0    2.61    0.29
  13   0   0    1.33    0.15
  13   0   0    1.54    0.18
 -13   0   0    1.60    0.19
   1   1   0    7.65    0.23
  -2  -1   0   27.71    0.71
   2   1   0   27.59    0.71
   2   1   0   28.51    0.70
  -3  -1   0   15.91    0.44
   3  -1   0   13.89    0.39
   3  -1   0   15.23    0.39
  -3   1   0   15.32    0.39
   3   1   0   15.91    0.43
   3   1   0   15.75    0.43
   4  -1   0   27.89    0.70
  -4  -1   0   28.09    0.73
   4   1   0   28.38    0.73
  -4   1   0   28.35    0.70
   4   1   0   28.64    0.73
   5  -1   0   69.32    1.70
  -5  -1   0   69.35    1.72
  -5   1   0   69.70    1.70
   5   1   0   70.18    1.73
   5   1   0   70.15    1.72
  -6  -1   0   32.45    0.85
   6  -1   0   32.68    0.83
  -6   1   0   33.08    0.82
   6   1   0   32.01    0.85
   6   1   0   33.67    0.85
   7  -1   0    3.58    0.19
  -7  -1   0    3.01    0.25
  -7   1   0    3.29    0.19
   7   1   0    3.64    0.23
   7   1   0    2.96    0.24
  -8  -1   0    0.34    0.15
   8  -1   0    0.32    0.11
   8  -1   0    0.18    0.13
  -8   1   0    0.24    0.11
   8   1   0    0.37    0.13
   8   1   0    0.24    0.14
   9  -1   0    8.88    0.32
  -9  -1   0    9.66    0.38
   9  -1   0    9.49    0.33
  -9   1   0    9.23    0.32
   9   1   0    9.15    0.37
   9   1   0    9.12    0.36
 -10  -1   0    9.57    0.47
  10  -1   0    9.98    0.34
 -10   1   0   10.61    0.35
  10   1   0   11.16    0.40
  10   1   0   10.53    0.39
  11  -1   0    2.61    0.24
  11  -1   0    2.24    0.23
 -11  -1   0    2.27    0.21
  11   1   0    3.14    0.27
  11   1   0    2.67    0.21
  12  -1   0    0.54    0.15
 -12  -1   0    0.35    0.19
  12   1   0    0.86    0.19
  12   1   0    0.36    0.16
  13  -1   0    2.49    0.27
 -13  -1   0    2.33    0.22
  13   1   0    2.11    0.20
  13   1   0    2.34    0.21
   0  -2   0  617.90   15.65
   0   2   0  666.81   15.65
   0   2   0  649.89   15.66
   1   2   0    3.51    0.18
  -1   2   0    3.27    0.14
  -1   2   0    3.38    0.13
   1   2   0    3.08    0.19
  -2  -2   0  118.10    3.01
   2  -2   0  140.88    3.00
   2   2   0  118.09    3.00
   2   2   0  116.41    3.01
  -3  -2   0  110.75    2.76
   3   2   0  112.12    2.75
   3   2   0  115.40    2.76
  -4  -2   0   20.27    0.56
   4   2   0   20.08    0.55
   4   2   0   19.97    0.56
   5  -2   0    4.32    0.14
   5  -2   0    3.96    0.14
   6  -2   0    3.45    0.14
  -6  -2   0    3.17    0.25
   6  -2   0    3.25    0.14
   6   2   0    3.50    0.24
   6   2   0    3.06    0.24
   7  -2   0    2.01    0.14
   7  -2   0    2.03    0.15
  -7  -2   0    2.19    0.18
   7   2   0    2.03    0.17
   7   2   0    2.04    0.16
  -8  -2   0    4.33    0.32
   8  -2   0    4.82    0.20
   8  -2   0    4.90    0.19
   8   2   0    4.53    0.29
   8   2   0    4.53    0.30
   9  -2   0    2.57    0.18
  -9  -2   0    2.45    0.21
   9  -2   0    2.64    0.17
   9   2   0    2.32    0.20
   9   2   0    2.90    0.29
  10  -2   0   12.21    0.36
  10  -2   0   12.90    0.38
 -10  -2   0   13.16    0.47
  10   2   0   12.54    0.46
  10   2   0   12.42    0.46
  11  -2   0    1.63    0.16
 -11  -2   0    1.72    0.21
  11  -2   0    1.69    0.21
  11   2   0    1.93    0.19
  11   2   0    1.45    0.19
  12  -2   0    6.01    0.27
  12  -2   0    6.48    0.25
 -12  -2   0    6.54    0.40
  12   2   0    6.01    0.38
  12   2   0    6.34    0.36
  13  -2   0    1.19    0.14
  13  -2   0    1.84    0.19
 -13  -2   0    1.81    0.24
  13   2   0    1.48    0.22
  13   2   0    1.64    0.21
   0  -3   0   -0.08    0.11
   0   3   0    0.00    0.10
   0   3   0   -0.03    0.11
   1  -3   0    2.83    0.17
   1   3   0    2.97    0.23
  -1   3   0    2.88    0.17
  -1   3   0    2.78    0.17
   1   3   0    2.60    0.21
  -2  -3   0   78.29    1.86
  -2   3   0   77.35    1.83
  -2   3   0   69.71    1.83
   2   3   0   76.23    1.86
   2   3   0   74.85    1.86
  -3  -3   0   76.11    1.85
   3   3   0   75.08    1.85
   3   3   0   72.93    1.85
  -4  -3   0  125.51    3.04
   4   3   0  121.61    3.03
   4   3   0  124.53    3.04
  -5  -3   0  290.44    7.08
   5   3   0  288.29    7.07
   5   3   0  295.03    7.07
  -6  -3   0    9.06    0.36
   6   3   0    8.77    0.35
   6   3   0    9.06    0.35
  -7  -3   0    5.32    0.32
   7   3   0    5.52    0.31
   7   3   0    4.72    0.31
  -8  -3   0    0.07    0.18
   8   3   0    0.38    0.17
   8   3   0    0.25    0.16
  -9  -3   0    1.23    0.20
   9   3   0    1.46    0.19
   9   3   0    1.41    0.19
 -10  -3   0   12.46    0.49
  10   3   0   12.57    0.48
  10   3   0   12.83    0.48
 -11  -3   0    1.56    0.22
  11   3   0    1.29    0.21
  11   3   0    1.28    0.21
 -12  -3   0    0.71    0.22
  12   3   0    0.09    0.17
  12   3   0    0.62    0.19
 -13  -3   0    1.91    0.25
  13   3   0    2.34    0.24
   0  -4   0   41.48    1.04
   0   4   0   40.51    1.03
   0   4   0   40.85    1.03
   1  -4   0    1.70    0.18
  -1  -4   0    1.45    0.14
  -1   4   0    1.57    0.16
   1   4   0    2.06    0.21
  -1   4   0    1.81    0.17
   1   4   0    1.27    0.13
  -2  -4   0    6.25    0.30
  -2   4   0    6.77    0.22
   2   4   0    6.51    0.28
  -2   4   0    6.53    0.22
   2   4   0    6.08    0.28
  -3  -4   0    4.57    0.28
   3  -4   0    5.10    0.17
  -3   4   0    4.84    0.16
   3   4   0    4.52    0.27
  -3   4   0    5.01    0.16
   3   4   0    4.95    0.27
  -4  -4   0   20.12    0.59
   4   4   0   19.64    0.58
   4   4   0   20.24    0.58
  -5  -4   0    1.15    0.17
   5   4   0    0.74    0.15
   5   4   0    0.92    0.15
  -6  -4   0    1.86    0.18
   6   4   0    2.81    0.28
   6   4   0    2.50    0.27
  -7  -4   0    2.32    0.21
   7   4   0    2.25    0.37
   7   4   0    1.84    0.20
   8   4   0   10.07    0.42
   8   4   0   10.13    0.43
  -9  -4   0    1.98    0.22
   9   4   0    1.87    0.20
   9   4   0    1.84    0.21
 -10  -4   0    0.20    0.20
  10   4   0    0.12    0.20
  10   4   0    0.00    0.17
 -11  -4   0    2.75    0.26
  11   4   0    3.29    0.32
  11   4   0    2.65    0.25
 -12  -4   0    0.20    0.22
  12   4   0   -0.14    0.22
  12   4   0    0.33    0.21
 -13  -4   0    0.16    0.23
  13   4   0    0.19    0.23
   0  -5   0   -0.06    0.12
   0   5   0   -0.05    0.11
   0   5   0    0.06    0.12
  -1  -5   0    8.79    0.35
   1  -5   0    9.08    0.32
  -1   5   0    9.33    0.31
  -1   5   0    9.46    0.31
   1   5   0    9.26    0.33
   1   5   0    9.27    0.34
  -2  -5   0    7.28    0.33
   2  -5   0    6.79    0.25
   2   5   0    7.31    0.31
   2   5   0    7.42    0.32
  -2   5   0    7.25    0.25
  -2   5   0    6.77    0.24
  -3  -5   0    4.15    0.29
   3   5   0    4.29    0.28
  -3   5   0    4.34    0.17
   3   5   0    4.04    0.27
   4  -5   0    0.01    0.07
  -4  -5   0    0.13    0.16
   4   5   0    0.16    0.16
   4   5   0    0.23    0.15
  -5  -5   0    9.15    0.41
   5   5   0    9.89    0.39
   5   5   0   10.13    0.39
  -6  -5   0    7.19    0.38
   6   5   0    6.68    0.38
   6   5   0    7.12    0.36
  -7  -5   0    0.05    0.19
   7   5   0   -0.07    0.18
   7   5   0    0.03    0.17
  -8  -5   0    1.50    0.23
   8   5   0    1.16    0.20
   8   5   0    1.52    0.21
  -9  -5   0   -0.02    0.21
   9   5   0   -0.05    0.17
   9   5   0    0.10    0.18
 -10  -5   0   10.44    0.49
  10   5   0    9.61    0.45
  10   5   0   10.41    0.48
 -11  -5   0    1.58    0.26
  11   5   0    1.11    0.22
  11   5   0    2.07    0.27
 -12  -5   0    1.48    0.27
  12   5   0    2.74    0.35
   0  -6   0    0.40    0.14
   0   6   0    0.66    0.13
   0   6   0    0.52    0.13
  -1  -6   0   11.87    0.42
   1  -6   0   11.65    0.39
  -1   6   0   12.37    0.38
   1   6   0   12.40    0.40
  -1   6   0   12.02    0.38
   1   6   0   12.49    0.41
   2  -6   0    0.05    0.11
  -2  -6   0   -0.02    0.15
   2   6   0    0.01    0.14
  -2   6   0    0.07    0.10
   2   6   0   -0.05    0.14
  -2   6   0    0.03    0.10
  -3  -6   0   10.17    0.40
  -3   6   0   10.21    0.31
   3   6   0   10.12    0.40
   3   6   0    9.63    0.39
  -3   6   0   10.11    0.31
  -4  -6   0   10.79    0.44
   4  -6   0   10.52    0.31
  -4   6   0   10.13    0.29
   4   6   0   10.40    0.41
  -4   6   0   10.12    0.29
   4   6   0   10.47    0.42
  -5  -6   0    0.15    0.18
   5  -6   0    0.17    0.07
   5   6   0    0.04    0.18
   5   6   0    0.28    0.18
  -6  -6   0   10.24    0.45
   6   6   0    9.81    0.44
   6   6   0    9.70    0.44
  -7  -6   0    0.03    0.21
   7   6   0    0.12    0.21
   7   6   0    0.17    0.18
  -8  -6   0    0.72    0.22
   8   6   0    0.46    0.20
   8   6   0    0.70    0.22
  -9  -6   0    0.06    0.23
   9   6   0    0.04    0.18
   9   6   0    0.06    0.26
 -10  -6   0    0.04    0.24
  10   6   0    0.31    0.25
  10   6   0   -0.18    0.19
 -11  -6   0    5.89    0.47
  11   6   0    7.30    0.49
  11   6   0    6.18    0.44
 -12  -6   0    0.12    0.26
  12   6   0    0.79    0.27
   0  -7   0   -0.16    0.15
   0   7   0   -0.05    0.14
   0   7   0    0.06    0.14
  -1  -7   0    2.98    0.30
   1  -7   0    3.23    0.26
  -1   7   0    2.96    0.24
   1   7   0    2.51    0.27
  -1   7   0    2.91    0.25
   1   7   0    3.05    0.27
  -2  -7   0    3.51    0.32
   2  -7   0    3.62    0.24
  -2   7   0    3.06    0.23
   2   7   0    3.56    0.30
   2   7   0    3.14    0.29
  -2   7   0    3.67    0.23
   3  -7   0    8.21    0.31
  -3  -7   0    8.67    0.41
  -3   7   0    8.60    0.30
   3   7   0    8.24    0.39
   3   7   0    8.50    0.39
  -3   7   0    8.57    0.29
  -4  -7   0   45.68    1.25
   4   7   0   46.82    1.24
  -4   7   0   47.58    1.17
   4   7   0   48.24    1.25
  -4   7   0   46.62    1.17
  -5  -7   0   22.30    0.69
   5  -7   0   21.96    0.55
   5   7   0   17.94    0.91
   5   7   0   21.34    0.67
  -6  -7   0   14.09    0.58
   6   7   0   13.47    0.52
   6   7   0   12.17    0.56
  -7  -7   0    7.92    0.47
   7   7   0    7.82    0.42
   7   7   0    7.95    0.44
  -8  -7   0    0.55    0.25
   8   7   0    0.60    0.20
   8   7   0    1.13    0.24
  -9  -7   0    0.05    0.24
   9   7   0    0.31    0.24
   9   7   0   -0.08    0.19
 -10  -7   0    0.91    0.26
  10   7   0    1.50    0.28
  10   7   0    1.03    0.23
 -11  -7   0    0.96    0.27
  11   7   0    1.14    0.29
   0  -8   0    2.88    0.30
   0   8   0    2.74    0.27
   0   8   0    3.09    0.29
  -1  -8   0    0.52    0.18
   1  -8   0    0.27    0.16
   1   8   0    0.51    0.17
  -1   8   0    0.27    0.15
   1   8   0    0.21    0.16
  -1   8   0    0.40    0.15
  -2  -8   0    2.29    0.23
   2  -8   0    1.91    0.18
  -2   8   0    2.38    0.24
   2   8   0    2.10    0.20
  -2   8   0    1.84    0.16
   2   8   0    1.74    0.19
  -3  -8   0    0.01    0.19
   3  -8   0   -0.15    0.13
  -3   8   0   -0.02    0.12
   3   8   0    0.07    0.19
  -3   8   0    0.00    0.12
  -4  -8   0   10.53    0.47
  -4   8   0    8.84    0.31
   4   8   0    9.34    0.44
   4   8   0    9.59    0.44
  -5  -8   0   12.64    0.82
   5  -8   0   13.84    0.40
   5   8   0   14.19    0.54
   5   8   0   14.99    0.54
  -6  -8   0    4.92    0.44
   6   8   0    4.52    0.39
   6   8   0    4.18    0.39
  -7  -8   0    4.50    0.44
   7   8   0    3.93    0.39
   7   8   0    4.57    0.41
  -8  -8   0    5.96    0.47
   8   8   0    5.97    0.46
   8   8   0    5.29    0.41
  -9  -8   0   -0.31    0.26
   9   8   0    0.08    0.26
   9   8   0    0.44    0.21
 -10  -8   0   -0.05    0.26
  10   8   0    0.12    0.28
  11   8   0    0.44    0.30
   0  -9   0   -0.10    0.18
   0   9   0   -0.09    0.16
   0   9   0   -0.16    0.17
  -1  -9   0    0.54    0.20
   1  -9   0    0.56    0.18
  -1   9   0    0.76    0.21
  -1   9   0    0.95    0.17
   1   9   0    0.50    0.18
   1   9   0    0.28    0.19
  -2  -9   0    0.30    0.20
   2  -9   0    0.16    0.16
  -2   9   0    0.26    0.15
   2   9   0    0.09    0.18
  -2   9   0    0.36    0.15
   2   9   0    0.33    0.17
   3  -9   0    0.40    0.15
  -3  -9   0    0.23    0.21
   3   9   0    0.09    0.20
  -3   9   0    0.09    0.13
  -3   9   0    0.05    0.13
   3   9   0    0.04    0.18
   4  -9   0    6.39    0.29
  -4  -9   0    6.60    0.45
  -4   9   0    6.84    0.27
   4   9   0    6.38    0.42
  -4   9   0    6.95    0.28
   4   9   0    6.80    0.40
  -5  -9   0    0.16    0.26
   5  -9   0    0.27    0.11
  -5   9   0    0.09    0.09
   5   9   0    0.09    0.22
  -5   9   0    0.17    0.10
   5   9   0    0.20    0.20
  -6  -9   0   13.44    0.59
   6   9   0   12.80    0.56
   6   9   0   12.99    0.55
  -7  -9   0    0.42    0.28
   7   9   0    0.19    0.23
   7   9   0    0.07    0.23
  -8  -9   0   -0.12    0.26
   8   9   0    0.44    0.23
   8   9   0    0.42    0.27
  -9  -9   0    0.82    0.29
   9   9   0    0.51    0.33
   9   9   0    0.47    0.27
 -10  -9   0   -0.48    0.33
  10   9   0   -0.05    0.28
   0 -10   0   16.97    0.60
   0  10   0   17.56    0.57
   0  10   0   17.55    0.57
   1 -10   0    6.35    0.37
  -1 -10   0    5.93    0.41
  -1  10   0    6.27    0.34
   1  10   0    6.77    0.40
  -1  10   0    6.47    0.35
   1  10   0    6.43    0.36
   2 -10   0    5.56    0.34
  -2 -10   0    5.32    0.42
   2  10   0    5.30    0.39
  -2  10   0    5.48    0.32
   2  10   0    5.14    0.36
  -2  10   0    5.41    0.32
   3 -10   0    0.14    0.15
  -3 -10   0    0.32    0.24
  -3  10   0    0.08    0.13
  -3  10   0    0.01    0.15
   3  10   0    0.08    0.20
   3  10   0    0.03    0.21
  -4 -10   0   -0.01    0.25
   4 -10   0    0.08    0.13
   4  10   0   -0.43    0.24
  -4  10   0    0.07    0.14
   4  10   0   -0.16    0.21
  -4  10   0    0.14    0.14
  -5 -10   0    0.32    0.27
   5 -10   0    0.27    0.14
  -5  10   0    0.06    0.10
   5  10   0    0.44    0.22
   5  10   0    0.00    0.23
  -5  10   0    0.14    0.11
  -6 -10   0    3.80    0.35
   6  10   0    2.86    0.27
   6  10   0    3.28    0.30
  -7 -10   0    0.84    0.29
   7  10   0    0.62    0.25
   7  10   0    0.92    0.26
  -8 -10   0    3.16    0.36
   8  10   0    2.21    0.29
   8  10   0    2.47    0.32
  -9 -10   0    8.59    0.60
   9  10   0    7.89    0.55
   0 -11   0    0.27    0.22
   0  11   0   -0.07    0.19
   0  11   0    0.19    0.19
   1 -11   0    0.39    0.20
  -1 -11   0    0.25    0.23
  -1  11   0    0.21    0.18
   1  11   0    0.38    0.20
  -1  11   0    0.50    0.18
   1  11   0    0.60    0.22
  -2 -11   0    0.44    0.24
   2 -11   0    0.06    0.17
   2  11   0    0.84    0.43
  -2  11   0    0.58    0.17
  -2  11   0    0.41    0.17
   2  11   0    0.41    0.20
  -3 -11   0    0.78    0.28
   3 -11   0   -0.01    0.16
   3  11   0    0.02    0.21
   3  11   0    0.43    0.22
  -3  11   0    0.25    0.16
  -3  11   0    0.12    0.13
   4 -11   0   -0.11    0.13
  -4 -11   0    0.36    0.28
   4  11   0    0.10    0.24
  -4  11   0    0.32    0.16
   4  11   0   -0.10    0.20
  -4  11   0    0.00    0.14
  -5 -11   0    5.20    0.53
  -5  11   0    5.26    0.24
   5  11   0    4.55    0.46
   5  11   0    4.78    0.44
  -5  11   0    5.28    0.24
  -6 -11   0    0.44    0.30
   6  11   0    0.44    0.25
   6  11   0    0.30    0.25
  -7 -11   0    0.00    0.30
   7  11   0   -0.34    0.21
   7  11   0   -0.20    0.26
   0 -12   0    0.57    0.24
   0  12   0    0.24    0.21
   0  12   0    0.17    0.20
  -1 -12   0    5.61    0.47
   1 -12   0    5.71    0.41
  -1  12   0    6.02    0.38
  -1  12   0    6.16    0.40
   1  12   0    5.89    0.41
   1  12   0    5.04    0.40
  -2 -12   0   -0.20    0.26
   2 -12   0   -0.06    0.19
  -2  12   0   -0.21    0.19
   2  12   0    0.07    0.23
  -2  12   0    0.40    0.18
   2  12   0    0.47    0.21
  -3 -12   0    0.68    0.29
   3 -12   0    0.25    0.17
  -3  12   0    0.61    0.17
   3  12   0    0.78    0.24
   3  12   0    0.27    0.23
  -3  12   0    0.51    0.21
  -4 -12   0    0.28    0.30
   4 -12   0    0.19    0.17
  -4  12   0    0.28    0.15
   4  12   0    0.13    0.23
   4  12   0    0.22    0.22
  -4  12   0    0.08    0.22
  -5 -12   0    2.29    0.36
   5  12   0    2.55    0.28
  -5  12   0    2.93    0.23
   5  12   0    1.69    0.31
   0 -13   0   -0.08    0.27
   0  13   0   -0.09    0.27
   0  13   0    0.19    0.20
  -1 -13   0    2.95    0.34
   1 -13   0    3.18    0.31
  -1  13   0    2.99    0.25
   1  13   0    3.02    0.30
   1  13   0    3.70    0.35
  -2 -13   0    0.38    0.30
   2  13   0    0.43    0.31
  -2  13   0   -0.12    0.18
  13   0  -1   -0.20    0.12
  13   0  -1    0.24    0.16
 -12   0   1   -0.12    0.16
  12   0  -1    0.03    0.12
  12   0  -1   -0.18    0.15
 -11   0   1   -0.32    0.15
  11   0  -1   -0.10    0.15
  11   0  -1   -0.07    0.13
 -10   0   1   -0.21    0.15
  10   0  -1    0.11    0.13
  10   0  -1    0.11    0.15
   9   0  -1   -0.03    0.13
   9   0  -1   -0.08    0.13
  -9   0   1   -0.01    0.15
   8   0  -1   -0.16    0.12
  -8   0   1    0.08    0.13
   8   0  -1   -0.13    0.12
  -7   0   1   -0.02    0.12
   7   0  -1    0.00    0.12
   7   0  -1   -0.15    0.11
   6   0  -1    0.02    0.10
  -6   0   1   -0.04    0.11
   6   0  -1    0.04    0.10
   5   0  -1    0.10    0.10
   5   0  -1   -0.12    0.09
  -5   0   1   -0.14    0.10
  -4   0   1   -0.04    0.10
   4   0  -1    0.00    0.09
   4   0  -1    0.00    0.10
   3   0  -1   -0.06    0.09
   3   0  -1   -0.07    0.09
  -3   0   1   -0.02    0.08
  -3   0   1   -0.08    0.09
  -2   0   1   -0.06    0.07
   2   0  -1    0.09    0.07
   2   0  -1   -0.04    0.06
  -2   0   1    0.00    0.07
   1   0  -1    0.06    0.05
   1   0   1   -0.18    0.06
  -2   0  -1    0.01    0.07
   2   0   1   -0.12    0.07
   3   0   1    0.10    0.09
  -3   0  -1    0.10    0.09
  -4   0  -1   -0.01    0.09
   4   0   1   -0.15    0.09
   5   0   1   -0.03    0.10
  -5   0  -1    0.00    0.10
   6   0   1    0.01    0.10
   6   0   1    0.01    0.10
  -6   0  -1    0.06    0.11
   7   0   1   -0.17    0.11
   7   0   1   -0.14    0.11
  -7   0  -1    0.06    0.12
   8   0   1    0.02    0.13
  -8   0  -1    0.06    0.13
   8   0   1   -0.06    0.12
   9   0   1   -0.12    0.14
   9   0   1   -0.09    0.13
  -9   0  -1   -0.31    0.14
  10   0   1   -0.29    0.13
  10   0   1   -0.15    0.15
 -10   0  -1   -0.20    0.15
 -11   0  -1   -0.30    0.15
  11   0   1   -0.24    0.13
  11   0   1   -0.38    0.14
 -12   0  -1   -0.08    0.16
  12   0   1    0.01    0.15
  12   0   1   -0.05    0.12
  13   0   1   -0.28    0.12
  13   0   1    0.17    0.16
 -13   0  -1    0.31    0.17
  13  -1  -1    0.71    0.16
 -13  -1   1    0.34    0.19
  13   1  -1    0.34    0.16
  13   1  -1    0.59    0.16
 -12  -1   1    9.51    0.42
  12  -1  -1    9.81    0.36
  12  -1  -1    9.19    0.40
  12   1  -1   10.18    0.43
  12   1  -1    9.93    0.39
  11  -1  -1    4.97    0.28
  11  -1  -1    4.81    0.26
 -11  -1   1    5.22    0.34
  11   1  -1    5.54    0.31
  11   1  -1    5.52    0.32
  10  -1  -1   23.25    0.62
 -10  -1   1   21.33    0.72
  10   1  -1   23.26    0.66
  10   1  -1   24.45    0.67
   9  -1  -1    0.19    0.12
  -9  -1   1   -0.01    0.16
   9  -1  -1    0.13    0.12
   9   1  -1    0.02    0.14
   9   1  -1    0.17    0.15
  -8  -1   1    1.47    0.17
   8  -1  -1    1.44    0.12
   8  -1  -1    1.66    0.13
   8   1  -1    1.25    0.16
   8   1  -1    1.68    0.16
  -8   1   1    1.87    0.19
  -7  -1   1    1.36    0.15
   7  -1  -1    1.58    0.17
   7  -1  -1    1.36    0.13
  -7   1   1    1.41    0.12
   7   1  -1    1.66    0.15
   7   1  -1    1.41    0.15
   6  -1  -1    8.35    0.26
  -6  -1   1    8.24    0.31
  -6   1   1    8.13    0.26
   6   1  -1    8.05    0.30
   6   1  -1    8.03    0.30
   5  -1  -1    2.22    0.15
  -5  -1   1    2.44    0.21
   5   1  -1    2.44    0.20
   5   1  -1    2.41    0.20
  -5   1   1    2.37    0.15
  -4  -1   1    2.12    0.20
   4  -1  -1    2.08    0.14
   4   1  -1    1.94    0.19
   4   1  -1    1.93    0.20
   3  -1  -1   88.19    2.08
  -3  -1   1   88.10    2.09
  -3  -1   1   84.99    2.09
   3   1  -1   84.09    2.09
  -3   1   1   82.21    2.07
   3   1  -1   84.61    2.09
  -2  -1   1    4.88    0.20
   2   1  -1    5.03    0.21
  -2   1   1    5.60    0.15
   2   1  -1    4.74    0.20
  -1  -1   1  129.15    3.08
  -1  -1   1  127.02    3.06
  -1   1   1  128.83    3.04
   1   1  -1  118.13    3.05
   1   1  -1  121.21    3.05
   0   1  -1   40.40    0.97
   0   1  -1   39.38    0.96
   0   1   1   38.24    0.97
  -1  -1  -1   12.64    0.35
   1  -1   1   12.35    0.33
   1   1   1   12.61    0.35
  -1   1  -1   12.75    0.33
   2  -1   1   48.01    1.15
  -2  -1  -1   46.17    1.17
   2   1   1   47.08    1.17
  -2   1  -1   46.90    1.15
  -3  -1  -1   63.25    1.57
   3  -1   1   65.13    1.55
  -3   1  -1   63.28    1.55
   3   1   1   63.46    1.57
  -4  -1  -1   11.53    0.35
   4  -1   1   11.58    0.32
  -4   1  -1   11.71    0.32
   4   1   1   11.18    0.36
   5  -1   1    2.28    0.15
  -5  -1  -1    2.43    0.21
  -5   1  -1    2.16    0.15
   5   1   1    2.04    0.20
   6  -1   1    4.94    0.20
  -6  -1  -1    4.83    0.26
   6   1   1    5.01    0.25
  -6   1  -1    4.99    0.20
   6   1   1    4.79    0.24
   7  -1   1    0.33    0.10
  -7  -1  -1    0.24    0.14
  -7   1  -1    0.27    0.10
   7   1   1    0.26    0.13
   7   1   1    0.25    0.12
   8  -1   1    0.21    0.12
  -8  -1  -1    0.07    0.15
   8  -1   1    0.04    0.11
  -8   1  -1    0.10    0.11
   8   1   1   -0.07    0.13
   8   1   1    0.15    0.14
   9  -1   1    2.61    0.21
  -9  -1  -1    3.52    0.29
   9  -1   1    2.86    0.23
   9   1   1    2.78    0.26
  -9   1  -1    2.31    0.22
   9   1   1    2.64    0.27
 -10  -1  -1    0.31    0.21
  10  -1   1    0.47    0.12
  10   1   1    0.17    0.15
  10   1   1    0.55    0.16
 -10   1  -1    0.48    0.14
  11  -1   1    8.75    0.35
  11  -1   1    9.11    0.34
 -11  -1  -1    8.18    0.39
 -11   1  -1    8.54    0.33
  11   1   1    8.23    0.38
  11   1   1    8.71    0.37
  12  -1   1    0.22    0.14
 -12  -1  -1   -0.18    0.18
 -12   1  -1    0.48    0.15
  12   1   1    0.31    0.18
  12   1   1    0.51    0.16
  13  -1   1    0.37    0.14
 -13  -1  -1    0.26    0.19
  13   1   1    0.66    0.18
  13   1   1    0.37    0.15
  13  -2  -1    4.77    0.27
  13  -2  -1    5.59    0.25
 -13  -2   1    5.80    0.40
  13   2  -1    5.71    0.36
  13   2  -1    5.35    0.39
 -12  -2   1    0.12    0.20
  12  -2  -1    0.17    0.11
  12  -2  -1    0.11    0.13
  12   2  -1   -0.13    0.18
  12   2  -1    0.05    0.17
 -11  -2   1    0.96    0.20
  11  -2  -1    1.32    0.11
  11  -2  -1    1.42    0.13
  11   2  -1    0.97    0.18
  11   2  -1    0.98    0.18
  10  -2  -1    0.10    0.09
 -10  -2   1    0.35    0.18
  10  -2  -1    0.21    0.10
  10   2  -1    0.23    0.17
  10   2  -1    0.19    0.17
   9  -2  -1    7.67    0.26
   9  -2  -1    7.83    0.27
  -9  -2   1    7.51    0.38
   9   2  -1    7.57    0.35
   9   2  -1    7.83    0.37
   8  -2  -1    0.76    0.10
   8  -2  -1    0.69    0.10
  -8  -2   1    0.78    0.17
   8   2  -1    0.70    0.16
   8   2  -1    0.54    0.16
   7  -2  -1    4.94    0.18
  -7  -2   1    4.54    0.30
   7  -2  -1    4.57    0.19
   7   2  -1    4.90    0.28
   7   2  -1    4.79    0.29
   6  -2  -1   58.51    1.44
   6  -2  -1   58.11    1.44
  -6  -2   1   57.44    1.48
   6   2  -1   59.65    1.48
   6   2  -1   60.48    1.48
   5  -2  -1   62.05    1.51
   5  -2  -1   60.30    1.51
  -5  -2   1   62.61    1.55
   5   2  -1   61.33    1.55
   5   2  -1   63.14    1.54
   4  -2  -1   96.03    2.34
  -4  -2   1   98.11    2.38
   4  -2  -1   95.08    2.34
   4   2  -1   97.32    2.37
   4   2  -1   96.63    2.37
  -3  -2   1    0.79    0.14
  -3  -2   1    0.64    0.12
   3   2  -1    0.74    0.12
  -2  -2   1    1.15    0.13
  -1  -2   1    1.92    0.19
   1   2  -1    2.00    0.18
   0  -2  -1   69.77    1.72
   0  -2   1   69.18    1.72
   0  -2   1   71.50    1.72
   0   2   1   68.63    1.72
   0   2  -1   71.69    1.72
   0   2  -1   71.57    1.72
  -1  -2  -1   53.72    1.33
   1  -2   1   55.06    1.31
  -1   2  -1   53.78    1.31
  -1   2  -1   52.56    1.31
   1   2   1   53.55    1.33
   2  -2   1   65.94    1.60
  -2  -2  -1   67.38    1.63
  -2   2  -1   61.10    1.60
   2   2   1   68.05    1.63
  -2   2  -1   67.16    1.60
  -3  -2  -1    8.15    0.31
   3   2   1    8.55    0.31
  -4  -2  -1  174.00    4.25
   4   2   1  175.35    4.25
  -5  -2  -1   15.14    0.46
   5  -2   1   15.64    0.39
   5  -2   1   14.99    0.39
   5   2   1   15.10    0.46
   6  -2   1   32.05    0.79
  -6  -2  -1   32.10    0.85
   6  -2   1   32.04    0.79
   6   2   1   32.10    0.84
   6   2   1   30.92    0.84
  -7  -2  -1    0.41    0.15
   7  -2   1    0.19    0.08
   7  -2   1    0.17    0.08
   7   2   1    0.18    0.14
   7   2   1    0.11    0.14
  -7   2  -1    0.15    0.07
   8  -2   1   12.74    0.36
  -8  -2  -1   12.38    0.45
   8  -2   1   12.85    0.35
   8   2   1   11.81    0.46
  -8   2  -1   12.52    0.34
   8   2   1   12.63    0.43
  -9  -2  -1    2.02    0.22
   9  -2   1    2.40    0.18
   9  -2   1    2.07    0.17
   9   2   1    2.29    0.20
   9   2   1    2.29    0.20
 -10  -2  -1   -0.15    0.18
  10  -2   1    0.23    0.09
  10  -2   1    0.13    0.10
  10   2   1    0.08    0.17
  10   2   1    0.23    0.17
  11  -2   1    0.59    0.15
  11  -2   1    0.64    0.10
 -11  -2  -1    0.39    0.19
  11   2   1    0.65    0.18
  11   2   1    0.32    0.17
  12  -2   1    3.48    0.21
 -12  -2  -1    3.50    0.36
  12  -2   1    3.03    0.23
  12   2   1    3.11    0.25
  12   2   1    3.61    0.32
  13  -2   1    1.16    0.12
 -13  -2  -1    0.86    0.22
  13  -2   1    0.81    0.14
  13   2   1    1.08    0.20
  13   2   1    0.79    0.20
 -13  -3   1   -0.16    0.22
  13   3  -1   -0.12    0.21
 -12  -3   1    3.02    0.26
  12   3  -1    3.59    0.34
  12   3  -1    2.94    0.31
 -11  -3   1    1.61    0.22
  11   3  -1    1.14    0.21
  11   3  -1    1.14    0.21
 -10  -3   1    0.89    0.20
  10   3  -1    0.44    0.19
  10   3  -1    0.42    0.19
  -9  -3   1    1.41    0.21
   9   3  -1    1.48    0.19
   9   3  -1    1.03    0.19
  -8  -3   1    1.14    0.19
   8   3  -1    1.07    0.18
   8   3  -1    1.02    0.18
  -7  -3   1    1.00    0.18
   7   3  -1    0.77    0.16
   7   3  -1    0.93    0.17
  -6  -3   1    8.17    0.36
   6   3  -1    8.84    0.35
   6   3  -1    8.68    0.34
  -5  -3   1    3.25    0.27
   5   3  -1    3.25    0.25
   5   3  -1    3.39    0.25
  -4  -3   1   15.03    0.47
   4   3  -1   15.57    0.46
   4   3  -1   15.46    0.46
  -3  -3   1    3.07    0.24
   3  -3  -1    3.14    0.13
   3   3  -1    2.99    0.23
  -3   3   1    3.13    0.11
   3   3  -1    2.72    0.23
  -2  -3   1   12.08    0.38
  -2  -3   1   11.95    0.37
  -2   3   1   11.86    0.32
   2   3  -1   12.19    0.38
   2   3  -1   11.84    0.37
   1  -3  -1   59.21    1.49
  -1  -3   1   62.13    1.51
  -1  -3   1   60.64    1.51
  -1   3   1   61.42    1.49
   1   3  -1   60.51    1.51
   1   3  -1   61.27    1.51
   0  -3   1   67.17    1.65
   0  -3  -1   67.16    1.65
   0  -3   1   66.71    1.64
   0   3   1   65.68    1.64
   0   3  -1   67.88    1.64
   0   3  -1   66.00    1.64
   1  -3   1   59.59    1.49
  -1  -3  -1   61.41    1.51
   1  -3   1   61.39    1.50
   1   3   1   61.96    1.51
  -1   3  -1   61.39    1.49
  -1   3  -1   60.03    1.50
   2  -3   1    3.60    0.15
  -2   3  -1    3.71    0.15
   3  -3   1   32.46    0.83
  -3  -3  -1   35.00    0.88
   3   3   1   33.90    0.88
  -4  -3  -1    4.76    0.28
   4   3   1    4.53    0.27
  -5  -3  -1   52.87    1.35
   5   3   1   52.61    1.35
   5   3   1   54.03    1.35
  -6  -3  -1   12.81    0.44
   6   3   1   12.78    0.43
   6   3   1   12.79    0.43
  -7  -3  -1    4.79    0.32
   7   3   1    4.68    0.30
   7   3   1    4.86    0.30
  -8  -3  -1    4.04    0.33
   8   3   1    3.95    0.31
   8   3   1    4.11    0.31
  -9  -3  -1    0.34    0.19
   9   3   1    0.03    0.17
   9   3   1   -0.04    0.17
 -10  -3  -1    0.14    0.19
  10   3   1   -0.13    0.19
  10   3   1   -0.09    0.18
 -11  -3  -1    2.06    0.24
  11   3   1    2.37    0.23
  11   3   1    2.14    0.23
 -12  -3  -1    0.33    0.21
  12   3   1    0.16    0.17
  12   3   1   -0.14    0.19
 -13  -3  -1    2.95    0.28
  13   3   1    3.42    0.38
 -13  -4   1    0.53    0.24
  13   4  -1    0.88    0.25
 -12  -4   1    0.60    0.23
  12   4  -1    0.57    0.22
  12   4  -1    0.33    0.23
 -11  -4   1    3.88    0.39
  11   4  -1    3.64    0.34
  11   4  -1    4.16    0.38
 -10  -4   1    1.43    0.23
  10   4  -1    1.33    0.20
  10   4  -1    1.65    0.21
  -9  -4   1    0.92    0.21
   9   4  -1    0.65    0.20
   9   4  -1    0.83    0.19
   8   4  -1    0.18    0.18
   8   4  -1    0.31    0.18
  -7  -4   1    1.65    0.21
   7   4  -1    1.41    0.18
  -6  -4   1   43.88    1.17
   6   4  -1   45.55    1.17
   6   4  -1   44.66    1.16
  -5  -4   1    6.47    0.34
   5   4  -1    6.74    0.32
   5   4  -1    6.72    0.32
  -4  -4   1    2.89    0.27
   4  -4  -1    3.10    0.12
   4   4  -1    2.75    0.26
   4   4  -1    3.20    0.25
  -3  -4   1    1.33    0.15
   3  -4  -1    1.34    0.15
  -3   4   1    1.72    0.12
   3   4  -1    1.28    0.14
  -3   4   1    1.62    0.12
   3   4  -1    1.51    0.16
   2  -4  -1   27.22    0.74
  -2  -4   1   29.96    0.78
   2   4  -1   29.93    0.77
   2   4  -1   29.69    0.78
  -2   4   1   30.08    0.74
  -1  -4   1   53.83    1.35
   1  -4  -1   55.06    1.34
   1   4  -1   53.32    1.35
  -1   4   1   53.97    1.33
   1   4  -1   53.31    1.35
   0  -4  -1   38.00    0.96
   0  -4   1   37.83    0.96
   0   4  -1   37.45    0.95
   0   4  -1   37.12    0.95
   0   4   1   37.66    0.95
   1  -4   1   52.73    1.31
  -1  -4  -1   53.03    1.33
  -1   4  -1   53.17    1.31
  -1   4  -1   51.55    1.31
   1   4   1   53.76    1.33
  -2  -4  -1    6.57    0.29
  -2   4  -1    6.35    0.23
   2   4   1    6.55    0.30
  -2   4  -1    6.56    0.23
   3  -4   1   40.15    0.98
  -3  -4  -1   40.31    1.04
   3   4   1   39.74    1.03
  -3   4  -1   40.10    0.98
  -3   4  -1   39.09    0.98
  -4  -4  -1    2.84    0.27
   4   4   1    2.97    0.25
   4   4   1    3.45    0.27
  -5  -4  -1    0.84    0.15
   5   4   1    0.62    0.14
   5   4   1    0.78    0.16
  -6  -4  -1    0.28    0.17
   6   4   1    0.30    0.15
   6   4   1    0.10    0.15
  -7  -4  -1   18.00    0.57
   7   4   1   14.95    0.65
   7   4   1   17.79    0.55
  -8  -4  -1    0.38    0.27
   8   4   1    0.18    0.18
   8   4   1    0.19    0.17
  -9  -4  -1    0.27    0.20
   9   4   1    0.41    0.20
   9   4   1    0.35    0.17
 -10  -4  -1    0.31    0.21
  10   4   1    0.07    0.19
  10   4   1    0.40    0.18
 -11  -4  -1    0.49    0.22
  11   4   1    0.66    0.21
  11   4   1    0.22    0.18
 -12  -4  -1    1.96    0.25
  12   4   1    1.92    0.26
  12   4   1    1.96    0.25
 -13  -4  -1    0.75    0.24
  13   4   1    0.32    0.24
 -12  -5   1    0.23    0.24
  12   5  -1    0.51    0.30
 -11  -5   1    5.20    0.43
  11   5  -1    4.77    0.38
  11   5  -1    5.59    0.43
 -10  -5   1    1.57    0.25
  10   5  -1    1.92    0.23
  10   5  -1    1.97    0.25
  -9  -5   1    1.78    0.24
   9   5  -1    1.96    0.21
   9   5  -1    1.86    0.24
  -8  -5   1    0.92    0.22
   8   5  -1    0.61    0.20
   8   5  -1    0.77    0.19
  -7  -5   1    5.12    0.37
   7   5  -1    4.08    0.34
   7   5  -1    4.28    0.34
  -6  -5   1    7.14    0.40
   6   5  -1    7.44    0.36
   6   5  -1    6.99    0.37
  -5  -5   1    0.04    0.17
   5   5  -1    0.38    0.17
   5   5  -1    0.20    0.15
  -4  -5   1    3.47    0.29
   4  -5  -1    3.73    0.16
   4   5  -1    4.02    0.28
   4   5  -1    3.49    0.29
  -4   5   1    3.87    0.14
  -4   5   1    3.74    0.14
  -3  -5   1    1.31    0.17
  -3   5   1    1.57    0.14
   3   5  -1    1.10    0.14
  -3   5   1    1.46    0.14
   3   5  -1    1.43    0.17
   2  -5  -1   43.75    1.10
  -2  -5   1   43.49    1.13
   2   5  -1   44.55    1.12
   2   5  -1   43.95    1.13
  -2   5   1   43.65    1.10
  -2   5   1   44.08    1.09
  -1  -5   1   55.69    1.43
   1  -5  -1   56.65    1.42
   1   5  -1   56.21    1.42
   1   5  -1   57.37    1.43
  -1   5   1   58.08    1.41
  -1   5   1   57.07    1.41
   0  -5  -1   17.82    0.51
   0  -5   1   17.49    0.51
   0   5  -1   17.43    0.51
   0   5  -1   18.06    0.50
   0   5   1   17.78    0.50
   0   5   1   17.85    0.50
   1  -5   1   10.14    0.34
  -1  -5  -1    9.78    0.36
  -1   5  -1   10.04    0.32
   1   5   1   10.46    0.36
  -1   5  -1   10.16    0.32
  -2  -5  -1    3.87    0.27
   2  -5   1    3.65    0.20
   2   5   1    3.56    0.27
  -2   5  -1    3.61    0.19
  -2   5  -1    3.83    0.19
   2   5   1    3.76    0.25
  -3  -5  -1    8.48    0.36
   3   5   1    8.88    0.35
   3   5   1    8.08    0.33
  -3   5  -1    7.73    0.32
  -3   5  -1    8.64    0.25
  -4  -5  -1    5.79    0.33
   4  -5   1    5.51    0.19
   4   5   1    5.87    0.31
   4   5   1    6.23    0.32
  -5  -5  -1   21.47    0.65
   5   5   1   21.95    0.64
   5   5   1   21.90    0.64
  -6  -5  -1    4.99    0.36
   6   5   1    4.89    0.33
   6   5   1    5.26    0.34
  -7  -5  -1   -0.04    0.20
   7   5   1   -0.02    0.18
   7   5   1    0.02    0.19
  -8  -5  -1    5.13    0.39
   8   5   1    5.48    0.37
   8   5   1    5.11    0.36
  -9  -5  -1    5.69    0.42
   9   5   1    5.84    0.36
   9   5   1    6.13    0.40
 -10  -5  -1    2.13    0.26
  10   5   1    1.93    0.24
  10   5   1    1.85    0.23
 -11  -5  -1    2.16    0.27
  11   5   1    2.26    0.24
  11   5   1    2.31    0.27
 -12  -5  -1    0.20    0.24
  12   5   1    0.60    0.32
 -12  -6   1    0.01    0.26
  12   6  -1    0.08    0.25
 -11  -6   1    0.15    0.25
  11   6  -1    0.14    0.25
  11   6  -1   -0.33    0.22
 -10  -6   1    4.02    0.43
  10   6  -1    3.86    0.35
  10   6  -1    4.43    0.43
  -9  -6   1   11.22    0.51
   9   6  -1    8.47    0.73
   9   6  -1   11.60    0.47
  -8  -6   1    0.35    0.23
   8   6  -1    0.34    0.20
   8   6  -1    0.33    0.21
  -7  -6   1    0.46    0.22
   7   6  -1    0.51    0.20
   7   6  -1    0.24    0.20
  -6  -6   1    5.27    0.39
   6   6  -1    5.58    0.37
   6   6  -1    5.35    0.36
  -5  -6   1   11.54    0.48
   5  -6  -1   11.84    0.32
   5   6  -1   11.77    0.46
   5   6  -1   11.60    0.45
  -4  -6   1    0.21    0.18
   4  -6  -1    0.11    0.09
   4   6  -1    0.13    0.16
   4   6  -1    0.25    0.17
  -4   6   1    0.19    0.08
  -4   6   1    0.15    0.08
   3  -6  -1    1.77    0.18
  -3  -6   1    2.03    0.19
   3   6  -1    2.10    0.19
  -3   6   1    1.78    0.17
   3   6  -1    2.06    0.19
  -3   6   1    1.97    0.17
   2  -6  -1    4.01    0.23
  -2  -6   1    3.94    0.30
   2   6  -1    4.15    0.28
  -2   6   1    4.39    0.21
  -2   6   1    4.17    0.22
   2   6  -1    3.70    0.27
   1  -6  -1    0.17    0.12
  -1  -6   1    0.13    0.14
   1   6  -1    0.37    0.14
  -1   6   1    0.08    0.12
   1   6  -1    0.25    0.13
  -1   6   1    0.12    0.11
   0  -6   1   84.52    2.11
   0  -6  -1   83.83    2.11
   0   6  -1   85.80    2.10
   0   6   1   84.38    2.10
   0   6  -1   86.06    2.10
   0   6   1   85.18    2.10
  -1  -6  -1    7.31    0.33
   1  -6   1    7.12    0.30
  -1   6  -1    7.02    0.29
   1   6   1    6.97    0.32
  -1   6  -1    7.33    0.28
   1   6   1    7.13    0.31
  -2  -6  -1    2.94    0.28
   2  -6   1    2.84    0.21
  -2   6  -1    2.92    0.19
   2   6   1    2.82    0.27
  -2   6  -1    2.76    0.20
   2   6   1    3.00    0.27
   3  -6   1   10.87    0.38
  -3  -6  -1   12.42    0.45
  -3   6  -1   11.65    0.34
   3   6   1   12.12    0.43
   3   6   1   12.33    0.43
  -3   6  -1   12.04    0.35
   4  -6   1   13.99    0.38
  -4  -6  -1   13.65    0.50
  -4   6  -1   13.44    0.37
   4   6   1   14.17    0.48
   4   6   1   13.94    0.48
  -4   6  -1   13.45    0.37
  -5  -6  -1    0.99    0.20
   5   6   1    0.73    0.17
   5   6   1    1.19    0.19
  -6  -6  -1    2.43    0.23
   6   6   1    2.62    0.23
   6   6   1    2.57    0.23
  -7  -6  -1    0.17    0.22
   7   6   1    0.03    0.19
   7   6   1    0.24    0.21
  -8  -6  -1    6.89    0.42
   8   6   1    7.08    0.42
   8   6   1    7.11    0.40
  -9  -6  -1    5.84    0.44
   9   6   1    5.84    0.51
   9   6   1    5.79    0.38
 -10  -6  -1   10.89    0.53
  10   6   1   10.36    0.48
  10   6   1   11.92    0.53
 -11  -6  -1   -0.09    0.24
  11   6   1    0.21    0.25
  11   6   1    0.08    0.25
 -12  -6  -1   -0.18    0.26
  12   6   1    0.36    0.26
 -11  -7   1   -0.19    0.26
  11   7  -1    0.07    0.28
 -10  -7   1    1.23    0.26
  10   7  -1    1.40    0.28
  10   7  -1    1.06    0.22
  -9  -7   1    0.79    0.25
   9   7  -1    0.53    0.20
   9   7  -1    0.67    0.25
  -8  -7   1    0.97    0.24
   8   7  -1    0.50    0.21
   8   7  -1    0.92    0.24
  -7  -7   1   15.42    0.59
   7   7  -1   15.55    0.57
   7   7  -1   14.40    0.56
  -6  -7   1   46.27    1.31
   6   7  -1   43.25    1.28
   6   7  -1   47.93    1.24
  -5  -7   1    0.84    0.23
   5  -7  -1    0.45    0.10
   5   7  -1    0.56    0.18
   5   7  -1    0.78    0.38
  -4  -7   1    0.52    0.21
   4   7  -1    0.74    0.19
  -4   7   1    0.50    0.10
   4   7  -1    0.39    0.19
  -4   7   1    0.48    0.10
  -3  -7   1    0.47    0.20
   3  -7  -1    0.33    0.12
   3   7  -1    0.45    0.19
   3   7  -1    0.38    0.17
  -3   7   1    0.40    0.11
  -3   7   1    0.10    0.11
   2  -7  -1    1.24    0.15
  -2  -7   1    1.02    0.19
  -2   7   1    1.12    0.13
   2   7  -1    1.14    0.18
  -2   7   1    1.14    0.14
   2   7  -1    0.98    0.17
  -1  -7   1    2.22    0.20
   1  -7  -1    2.27    0.18
   1   7  -1    2.27    0.19
   1   7  -1    2.56    0.27
  -1   7   1    2.53    0.24
  -1   7   1    2.54    0.24
   0  -7  -1    9.37    0.38
   0  -7   1    9.89    0.38
   0   7   1    9.54    0.37
   0   7  -1    9.06    0.36
   0   7   1    9.47    0.36
   0   7  -1    8.87    0.36
  -1  -7  -1    1.91    0.19
   1  -7   1    1.76    0.17
   1   7   1    1.98    0.18
  -1   7  -1    1.56    0.15
  -1   7  -1    1.87    0.16
   1   7   1    1.93    0.18
  -2  -7  -1    0.63    0.17
   2  -7   1    0.73    0.14
  -2   7  -1    0.41    0.13
  -2   7  -1    0.77    0.13
   2   7   1    0.37    0.16
   2   7   1    0.90    0.17
   3  -7   1   16.81    0.48
  -3  -7  -1   16.73    0.57
   3   7   1   16.65    0.55
  -3   7  -1   16.86    0.47
  -3   7  -1   16.63    0.48
   3   7   1   16.65    0.54
  -4  -7  -1    0.57    0.21
  -4   7  -1    0.50    0.10
   4   7   1    0.52    0.19
   4   7   1    0.29    0.20
  -4   7  -1    0.67    0.10
  -5  -7  -1    9.93    0.46
   5   7   1    9.83    0.45
   5   7   1    7.20    0.53
  -6  -7  -1    2.92    0.27
   6   7   1    3.74    0.36
   6   7   1    3.58    0.31
  -7  -7  -1    0.92    0.22
   7   7   1    1.57    0.23
   7   7   1    0.87    0.23
  -8  -7  -1    0.11    0.23
   8   7   1    0.18    0.23
   8   7   1    0.13    0.19
  -9  -7  -1    1.17    0.27
   9   7   1    0.72    0.22
   9   7   1    0.91    0.24
 -10  -7  -1   -0.19    0.25
  10   7   1   -0.03    0.21
  10   7   1   -0.29    0.24
 -11  -7  -1    1.79    0.30
  11   7   1    2.16    0.31
  11   8  -1    0.75    0.30
 -10  -8   1    0.45    0.27
  10   8  -1    0.52    0.27
  -9  -8   1   -0.29    0.25
   9   8  -1    0.25    0.22
   9   8  -1   -0.04    0.24
  -8  -8   1    2.85    0.31
   8   8  -1    2.31    0.25
   8   8  -1    2.77    0.30
  -7  -8   1    0.18    0.25
   7   8  -1    0.40    0.22
   7   8  -1    0.52    0.22
  -6  -8   1   62.95    1.66
   6  -8  -1   61.50    1.53
   6   8  -1   62.44    1.64
   6   8  -1   63.63    1.64
   5  -8  -1  104.91    2.54
  -5   8   1  103.14    2.53
   5   8  -1  105.96    2.61
  -5   8   1  101.94    2.53
   5   8  -1  103.23    2.62
  -4  -8   1    3.72    0.39
   4   8  -1    4.35    0.36
   4   8  -1    4.50    0.37
  -4   8   1    3.45    0.22
   3  -8  -1    0.35    0.14
  -3  -8   1    0.54    0.22
  -3   8   1    0.37    0.12
   3   8  -1    0.22    0.33
  -3   8   1    0.21    0.13
   3   8  -1    0.11    0.19
  -2  -8   1    2.46    0.23
   2  -8  -1    2.39    0.27
  -2   8   1    2.25    0.24
  -2   8   1    2.24    0.17
   2   8  -1    2.36    0.22
   2   8  -1    2.13    0.20
   1  -8  -1   13.18    0.46
  -1  -8   1   13.06    0.49
   1   8  -1   13.30    0.46
  -1   8   1   12.19    0.44
  -1   8   1   14.09    0.45
   1   8  -1   13.86    0.47
   0  -8  -1    9.28    0.41
   0  -8   1    9.51    0.41
   0   8   1    9.97    0.38
   0   8  -1    9.22    0.39
   0   8   1    9.80    0.39
   0   8  -1    9.46    0.38
   1  -8   1    8.55    0.37
  -1  -8  -1    8.38    0.41
   1   8   1    9.06    0.39
  -1   8  -1    8.53    0.35
  -1   8  -1    8.24    0.35
   1   8   1    8.36    0.38
  -2  -8  -1   17.39    0.59
   2  -8   1   16.67    0.53
  -2   8  -1   16.89    0.51
   2   8   1   18.01    0.57
   2   8   1   17.43    0.56
  -2   8  -1   17.05    0.51
  -3  -8  -1   17.56    0.60
   3  -8   1   17.41    0.50
  -3   8  -1   16.85    0.49
   3   8   1   14.83    0.79
  -3   8  -1   16.75    0.49
   3   8   1   16.82    0.57
  -4  -8  -1  124.72    3.06
   4   8   1  123.00    3.06
   4   8   1  125.04    3.05
  -4   8  -1  114.33    3.02
  -4   8  -1  123.65    2.98
   5  -8   1   20.75    0.55
   5   8   1   20.30    0.67
   5   8   1   20.10    0.67
  -5   8  -1   21.41    0.53
  -6  -8  -1   13.70    0.56
   6   8   1   14.26    0.56
   6   8   1   13.51    0.55
  -7  -8  -1    0.32    0.24
   7   8   1    0.46    0.24
   7   8   1    0.65    0.22
  -8  -8  -1    1.73    0.28
   8   8   1    1.43    0.23
   8   8   1    1.59    0.28
  -9  -8  -1    0.06    0.27
   9   8   1    0.11    0.22
   9   8   1    0.61    0.25
 -10  -8  -1    1.56    0.28
  10   8   1    1.35    0.29
  11   8   1    4.62    0.38
 -10  -9   1   -0.49    0.39
  10   9  -1    0.23    0.28
  -9  -9   1    1.37    0.30
   9   9  -1    1.31    0.29
   9   9  -1    0.87    0.32
  -8  -9   1    2.54    0.31
   8   9  -1    1.69    0.24
   8   9  -1    1.95    0.27
  -7  -9   1    1.16    0.28
   7   9  -1    0.94    0.24
   7   9  -1    1.09    0.23
   6  -9  -1    3.13    0.17
  -6  -9   1    3.58    0.31
   6   9  -1    3.56    0.30
   6   9  -1    2.94    0.28
   5  -9  -1    0.99    0.12
  -5  -9   1    0.77    0.26
   5   9  -1    0.58    0.25
   5   9  -1    0.60    0.23
  -5   9   1    0.83    0.10
  -5   9   1    0.89    0.11
   4  -9  -1    0.47    0.13
  -4  -9   1    0.64    0.23
   4   9  -1    0.47    0.21
  -4   9   1    0.94    0.13
   4   9  -1    0.48    0.19
  -4   9   1    0.42    0.13
  -3  -9   1    9.50    0.47
   3  -9  -1    8.55    0.35
   3   9  -1    8.94    0.45
  -3   9   1    8.24    0.33
   3   9  -1    8.72    0.41
  -3   9   1    8.48    0.32
   2  -9  -1    0.13    0.16
  -2  -9   1    0.03    0.22
   2   9  -1    0.21    0.17
  -2   9   1    0.34    0.15
   2   9  -1    0.34    0.18
  -2   9   1    0.22    0.15
   1  -9  -1   -0.11    0.16
  -1  -9   1    0.16    0.19
  -1   9   1   -0.12    0.15
   1   9  -1   -0.09    0.17
   1   9  -1   -0.17    0.17
  -1   9   1   -0.05    0.18
   0  -9   1    5.20    0.36
   0  -9  -1    4.94    0.36
   0   9  -1    4.99    0.33
   0   9   1    4.75    0.33
   0   9  -1    5.04    0.33
   0   9   1    4.78    0.33
   1  -9   1    0.59    0.18
  -1  -9  -1    0.86    0.21
   1   9   1    0.52    0.18
  -1   9  -1    0.91    0.17
   1   9   1    0.79    0.20
  -1   9  -1    0.70    0.20
   2  -9   1    2.36    0.20
  -2  -9  -1    2.41    0.24
   2   9   1    2.43    0.23
  -2   9  -1    2.13    0.18
   2   9   1    2.44    0.22
  -2   9  -1    2.15    0.18
   3  -9   1    1.19    0.16
  -3  -9  -1    1.26    0.23
  -3   9  -1    1.11    0.15
   3   9   1    1.39    0.24
  -3   9  -1    1.27    0.15
   3   9   1    1.27    0.21
   4  -9   1    1.25    0.14
  -4  -9  -1    1.40    0.26
  -4   9  -1    1.20    0.15
   4   9   1    1.42    0.22
  -4   9  -1    1.43    0.14
   4   9   1    1.63    0.24
   5  -9   1   10.39    0.33
  -5  -9  -1    9.88    0.51
   5   9   1   10.98    0.48
  -5   9  -1   10.09    0.31
  -5   9  -1   10.34    0.31
   5   9   1   11.16    0.52
  -6  -9  -1    1.54    0.26
   6   9   1    2.04    0.27
   6   9   1    1.90    0.24
  -7  -9  -1    4.93    0.48
   7   9   1    4.27    0.43
   7   9   1    4.29    0.43
  -8  -9  -1    2.18    0.31
   8   9   1    2.09    0.25
   8   9   1    2.10    0.27
  -9  -9  -1   -0.02    0.27
   9   9   1   -0.54    0.47
   9   9   1    0.11    0.26
  10   9   1    0.49    0.30
  -9 -10   1   -0.06    0.31
   9  10  -1    0.19    0.26
  -8 -10   1    7.94    0.57
   8  10  -1    8.12    0.54
   8  10  -1    7.15    0.48
  -7 -10   1    0.15    0.29
   7  10  -1    0.85    0.24
   7  10  -1   -0.03    0.22
  -6 -10   1   -0.36    0.27
   6 -10  -1   -0.03    0.11
   6  10  -1    0.15    0.24
   6  10  -1    0.35    0.23
  -5 -10   1    0.24    0.27
  -5  10   1    0.39    0.11
   5  10  -1    0.02    0.20
   5  10  -1    0.13    0.23
  -5  10   1    0.26    0.11
  -4 -10   1    2.99    0.30
   4 -10  -1    2.35    0.23
  -4  10   1    2.53    0.23
   4  10  -1    2.76    0.27
  -4  10   1    2.53    0.24
   4  10  -1    2.24    0.22
  -3 -10   1    0.01    0.24
   3 -10  -1    0.18    0.15
  -3  10   1    0.02    0.13
   3  10  -1    0.43    0.21
  -3  10   1    0.12    0.15
   3  10  -1    0.06    0.20
   2 -10  -1    3.81    0.31
  -2 -10   1    3.64    0.29
  -2  10   1    4.38    0.30
   2  10  -1    3.94    0.37
  -2  10   1    3.67    0.28
   2  10  -1    3.14    0.35
   1 -10  -1    8.98    0.41
  -1 -10   1    8.56    0.45
  -1  10   1    8.26    0.38
   1  10  -1    8.78    0.43
  -1  10   1    8.96    0.38
   1  10  -1    8.74    0.41
   0 -10   1    0.51    0.21
   0 -10  -1    0.36    0.20
   0  10  -1    0.54    0.18
   0  10   1    0.37    0.17
   0  10   1    0.36    0.18
   0  10  -1    0.48    0.19
  -1 -10  -1   11.45    0.49
   1 -10   1   11.50    0.46
  -1  10  -1   11.49    0.44
   1  10   1   11.29    0.47
   1  10   1   10.68    0.45
  -1  10  -1   11.66    0.43
   2 -10   1    4.54    0.33
  -2 -10  -1    4.41    0.41
  -2  10  -1    4.86    0.31
   2  10   1    4.65    0.36
  -2  10  -1    4.73    0.30
   2  10   1    4.31    0.39
   3 -10   1   -0.11    0.15
  -3 -10  -1    0.18    0.23
   3  10   1    0.06    0.22
  -3  10  -1    0.16    0.14
  -3  10  -1    0.23    0.15
   3  10   1    0.24    0.19
  -4 -10  -1    1.11    0.26
   4 -10   1    0.84    0.14
  -4  10  -1    1.04    0.15
   4  10   1    0.96    0.21
   4  10   1    0.56    0.25
  -4  10  -1    0.89    0.15
   5 -10   1    1.48    0.15
  -5 -10  -1    1.51    0.29
   5  10   1    1.21    0.23
   5  10   1    1.40    0.26
  -5  10  -1    1.31    0.12
  -5  10  -1    1.66    0.13
  -6 -10  -1    7.41    0.55
   6  10   1    8.29    0.49
   6  10   1    8.50    0.51
  -7 -10  -1    0.53    0.30
   7  10   1    0.05    0.25
   7  10   1    0.22    0.26
  -8 -10  -1    9.08    0.58
   8  10   1    8.93    0.56
   8  10   1    8.86    0.52
  -9 -10  -1    3.51    0.38
  -7 -11   1   -0.06    0.30
   7  11  -1    0.87    0.28
   7  11  -1    1.07    0.23
  -6 -11   1    0.62    0.32
   6 -11  -1    0.96    0.13
   6  11  -1    1.05    0.28
   6  11  -1    0.36    0.26
  -5 -11   1   14.82    0.66
  -5  11   1   14.55    0.43
  -5  11   1   14.18    0.42
   5  11  -1   14.70    0.60
   5  11  -1   13.82    0.59
   4 -11  -1   14.89    0.47
  -4 -11   1   15.58    0.66
   4  11  -1   13.84    0.57
  -4  11   1   14.26    0.47
  -4  11   1   14.22    0.46
   4  11  -1   14.51    0.59
  -3 -11   1    0.72    0.28
   3 -11  -1    0.63    0.16
   3  11  -1    0.81    0.22
   3  11  -1    0.71    0.22
  -3  11   1    0.30    0.14
  -3  11   1    0.89    0.17
  -2 -11   1   -0.03    0.25
   2 -11  -1    0.18    0.17
   2  11  -1    0.19    0.42
  -2  11   1    0.28    0.16
   2  11  -1    0.16    0.21
  -2  11   1   -0.09    0.16
  -1 -11   1   16.49    0.64
   1 -11  -1   17.25    0.59
   1  11  -1   16.34    0.60
   1  11  -1   16.96    0.60
  -1  11   1   17.84    0.57
  -1  11   1   17.84    0.56
   0 -11  -1   11.78    0.52
   0 -11   1   12.86    0.52
   0  11   1   11.77    0.47
   0  11  -1   11.95    0.50
   0  11  -1   12.04    0.48
   0  11   1   12.76    0.50
   1 -11   1    2.80    0.24
  -1 -11  -1    2.30    0.27
   1  11   1    2.76    0.26
  -1  11  -1    2.54    0.22
   1  11   1    2.08    0.23
  -1  11  -1    2.93    0.23
   2 -11   1    1.06    0.19
  -2 -11  -1    0.76    0.26
   2  11   1    1.54    0.24
  -2  11  -1    1.13    0.19
   2  11   1    0.84    0.30
  -2  11  -1    1.18    0.18
  -3 -11  -1    2.37    0.31
   3 -11   1    3.06    0.28
   3  11   1    2.91    0.26
  -3  11  -1    3.12    0.26
  -3  11  -1    2.97    0.28
   3  11   1    3.23    0.28
  -4 -11  -1    2.33    0.32
   4 -11   1    2.01    0.17
   4  11   1    1.70    0.26
  -4  11  -1    2.10    0.18
   4  11   1    2.25    0.28
  -4  11  -1    2.05    0.18
  -5 -11  -1   10.15    0.59
  -5  11  -1   10.24    0.33
  -5  11  -1   10.19    0.33
   5  11   1   10.76    0.53
   5  11   1   10.08    0.54
  -6 -11  -1    2.00    0.32
   6  11   1    1.77    0.28
   6  11   1    2.27    0.29
  -7 -11  -1    1.95    0.33
   7  11   1    1.51    0.24
   7  11   1    1.33    0.28
  -5 -12   1    2.74    0.36
   5  12  -1    2.86    0.36
   5  12  -1    2.91    0.28
  -5  12   1    3.03    0.23
  -4 -12   1    0.61    0.31
   4 -12  -1    0.31    0.18
  -4  12   1    0.58    0.16
  -4  12   1    0.59    0.24
   4  12  -1    0.82    0.25
   4  12  -1    0.23    0.24
   3 -12  -1    0.52    0.18
  -3 -12   1    1.03    0.29
   3  12  -1    0.99    0.25
   3  12  -1    0.79    0.25
  -3  12   1    0.74    0.17
  -3  12   1    0.51    0.22
   2 -12  -1    1.61    0.22
  -2 -12   1    1.94    0.30
   2  12  -1    1.13    0.26
  -2  12   1    1.14    0.22
  -2  12   1    1.50    0.20
   2  12  -1    2.00    0.24
  -1 -12   1   -0.01    0.25
   1 -12  -1   -0.09    0.20
   1  12  -1   -0.20    0.20
   1  12  -1   -0.12    0.21
  -1  12   1    0.11    0.20
  -1  12   1    0.29    0.19
   0 -12   1    3.77    0.31
   0 -12  -1    4.34    0.41
   0  12   1    3.89    0.37
   0  12  -1    4.14    0.38
   0  12  -1    3.75    0.37
   0  12   1    4.43    0.38
   1 -12   1    0.62    0.22
  -1 -12  -1    0.40    0.26
   1  12   1    0.63    0.21
  -1  12  -1    0.85    0.20
   1  12   1    0.45    0.22
  -1  12  -1    1.07    0.22
  -2 -12  -1    1.29    0.28
   2 -12   1    0.71    0.20
   2  12   1    0.78    0.21
  -2  12  -1    0.39    0.21
  -2  12  -1    0.88    0.19
   2  12   1    0.81    0.24
  -3 -12  -1    6.89    0.53
   3 -12   1    6.40    0.36
   3  12   1    6.96    0.43
   3  12   1    6.23    0.46
  -3  12  -1    7.20    0.40
  -3  12  -1    6.45    0.35
  -4 -12  -1    1.90    0.34
   4 -12   1    1.49    0.21
   4  12   1    2.14    0.28
  -4  12  -1    1.84    0.27
   4  12   1    2.36    0.28
  -4  12  -1    2.25    0.18
  -5 -12  -1    7.77    0.60
  -5  12  -1    7.97    0.30
   5  12   1    8.34    0.57
   5  12   1    6.80    0.48
  -2 -13   1    5.41    0.41
   2  13  -1    5.88    0.56
  -2  13   1    4.93    0.36
   1 -13  -1    0.22    0.25
  -1 -13   1    0.14    0.30
  -1  13   1    0.24    0.19
   1  13  -1    0.35    0.30
   1  13  -1    0.81    0.26
   0 -13  -1   -0.43    0.26
   0 -13   1   -0.04    0.27
   0  13   1    0.51    0.21
   0  13   1    0.36    0.28
   0  13  -1    0.41    0.30
   0  13  -1    0.21    0.21
   1 -13   1    0.72    0.26
  -1 -13  -1    0.24    0.30
  -1  13  -1    0.95    0.21
   1  13   1    0.82    0.31
   1  13   1    0.44    0.25
  -2 -13  -1    1.43    0.33
   2  13   1    1.62    0.31
  -2  13  -1    1.26    0.20
  13   0  -2   -0.02    0.13
  13   0  -2    0.08    0.14
  12   0  -2    8.58    0.34
  12   0  -2    9.63    0.38
  11   0  -2   44.38    1.15
  11   0  -2   43.36    1.13
 -10   0   2   14.17    0.47
  10   0  -2   14.55    0.45
  10   0  -2   14.82    0.47
   9   0  -2   11.65    0.38
   9   0  -2   11.30    0.40
  -9   0   2   11.28    0.40
   8   0  -2   30.04    0.79
  -8   0   2   29.88    0.79
   8   0  -2   29.70    0.79
  -7   0   2    0.01    0.12
   7   0  -2    0.12    0.11
   7   0  -2   -0.01    0.12
   6   0  -2   46.29    1.15
   6   0  -2   44.67    1.15
  -6   0   2   46.55    1.15
   5   0  -2   43.99    1.09
   5   0  -2   42.80    1.09
  -5   0   2   43.68    1.10
  -5   0   2   43.92    1.09
  -4   0   2   38.86    0.98
  -4   0   2   39.66    0.98
   4   0  -2   38.67    0.98
   4   0  -2   39.31    0.98
   3   0  -2   21.85    0.57
  -3   0   2   22.54    0.57
  -3   0   2   22.07    0.58
   3   0  -2   21.57    0.57
  -1   0   2  140.45    3.35
   1   0  -2  130.20    3.34
   0   0   2  200.35    4.76
   0   0  -2  188.27    4.76
   1   0   2  104.95    2.35
  -1   0  -2   85.25    2.31
   2   0   2  169.76    4.06
  -2   0  -2  161.60    4.06
   3   0   2  225.71    5.60
  -3   0  -2  232.91    5.61
  -4   0  -2   64.06    1.59
   4   0   2   64.37    1.59
   5   0   2    0.33    0.10
  -5   0  -2    0.36    0.11
  -6   0  -2   31.85    0.81
   6   0   2   31.18    0.81
   7   0   2    0.59    0.12
  -7   0  -2    0.47    0.13
  -8   0  -2   16.25    0.48
   8   0   2   16.40    0.48
   8   0   2   16.00    0.47
  -9   0  -2   34.53    0.89
   9   0   2   33.23    0.89
   9   0   2   33.16    0.88
  10   0   2   93.92    2.34
  10   0   2   94.38    2.34
 -10   0  -2   94.86    2.34
  11   0   2    8.85    0.35
  11   0   2    8.98    0.37
 -11   0  -2    9.29    0.37
 -12   0  -2    9.12    0.38
  12   0   2    9.40    0.38
  12   0   2    9.05    0.35
  13   0   2    1.22    0.15
 -13   0  -2    1.35    0.19
  13   0   2    1.44    0.17
  13  -1  -2   -0.19    0.15
  13   1  -2   -0.05    0.16
  13   1  -2    0.68    0.15
  12  -1  -2    9.88    0.34
 -12  -1   2    9.44    0.42
  12  -1  -2    9.61    0.37
  12   1  -2    9.54    0.42
  12   1  -2   10.09    0.39
  11  -1  -2    4.12    0.24
  11  -1  -2    3.78    0.26
 -11  -1   2    4.21    0.33
  11   1  -2    3.99    0.31
  11   1  -2    4.15    0.29
  10  -1  -2    8.47    0.31
  10  -1  -2    8.82    0.33
 -10  -1   2    8.19    0.37
  10   1  -2    8.13    0.36
  10   1  -2    8.12    0.35
   9  -1  -2   13.56    0.41
  -9  -1   2   13.12    0.46
   9  -1  -2   12.83    0.40
   9   1  -2   12.82    0.45
   9   1  -2   12.73    0.43
   8  -1  -2   20.36    0.55
  -8  -1   2   19.82    0.59
   8  -1  -2   20.35    0.55
   8   1  -2   19.94    0.58
   8   1  -2   20.08    0.58
  -7  -1   2    0.13    0.13
   7  -1  -2    0.18    0.10
   7  -1  -2    0.21    0.11
   7   1  -2    0.03    0.13
   7   1  -2    0.23    0.12
   6  -1  -2   10.74    0.32
  -6  -1   2   10.64    0.36
   6  -1  -2   10.73    0.32
   6   1  -2   10.61    0.36
   6   1  -2   10.50    0.35
   5  -1  -2    1.45    0.16
  -5  -1   2    1.50    0.13
   5  -1  -2    1.32    0.14
  -5  -1   2    1.25    0.13
   5   1  -2    1.22    0.13
   5   1  -2    1.36    0.13
  -5   1   2    1.48    0.14
  -4  -1   2   58.70    1.48
   4  -1  -2   59.15    1.46
  -4  -1   2   60.76    1.48
   4   1  -2   59.93    1.47
   4   1  -2   60.95    1.48
  -4   1   2   57.86    1.46
  -3  -1   2   51.43    1.27
  -3  -1   2   51.36    1.26
   3  -1  -2   50.91    1.25
   3   1  -2   49.91    1.27
   3   1  -2   51.09    1.27
  -3   1   2   51.06    1.25
   2  -1  -2   91.65    2.36
  -2  -1   2   95.99    2.37
  -2  -1   2   97.00    2.37
   2   1  -2   94.00    2.37
   2   1  -2   95.10    2.37
  -2   1   2  110.08    2.38
  -1  -1   2    0.42    0.08
  -1  -1   2    0.69    0.09
   1  -1  -2    0.72    0.08
  -1   1   2    0.79    0.08
   1   1  -2    0.81    0.10
   1   1  -2    0.78    0.09
   0  -1  -2  208.48    5.38
   0  -1   2  231.46    5.39
   0   1   2  221.66    5.39
   0   1  -2  220.29    5.38
   1  -1   2  302.80    7.41
   1   1   2  302.24    7.44
  -1   1  -2  308.59    7.42
  -2  -1  -2   17.52    0.47
   2  -1   2   17.49    0.44
   2   1   2   17.12    0.47
  -2   1  -2   16.69    0.44
  -3  -1  -2   23.33    0.62
   3  -1   2   23.52    0.59
   3   1   2   23.71    0.62
  -3   1  -2   23.15    0.59
  -4  -1  -2    1.33    0.13
   4  -1   2    1.37    0.14
  -4   1  -2    1.50    0.14
   4   1   2    1.26    0.12
   5  -1   2    1.78    0.15
  -5  -1  -2    1.19    0.13
  -5   1  -2    1.55    0.15
   5   1   2    1.42    0.13
  -6  -1  -2    0.63    0.13
   6  -1   2    0.80    0.10
  -6   1  -2    0.70    0.10
   6   1   2    0.68    0.13
   7  -1   2   24.63    0.66
  -7  -1  -2   25.52    0.69
   7   1   2   25.48    0.69
  -7   1  -2   24.91    0.66
   8  -1   2    6.00    0.26
   8  -1   2    5.79    0.24
  -8  -1  -2    5.93    0.31
   8   1   2    6.15    0.29
  -8   1  -2    5.97    0.26
   8   1   2    5.96    0.31
   9  -1   2   17.52    0.51
  -9  -1  -2   17.93    0.55
   9  -1   2   18.87    0.52
   9   1   2   17.62    0.54
  -9   1  -2   18.21    0.51
   9   1   2   17.52    0.55
  10  -1   2   54.21    1.36
  10  -1   2   54.09    1.37
 -10  -1  -2   53.59    1.39
 -10   1  -2   54.56    1.36
  10   1   2   53.81    1.39
  10   1   2   53.58    1.38
  11  -1   2    1.70    0.15
  11  -1   2    1.67    0.15
 -11  -1  -2    1.67    0.20
 -11   1  -2    1.92    0.16
  11   1   2    2.22    0.20
  11   1   2    1.62    0.18
  12  -1   2    0.02    0.14
  12  -1   2    0.10    0.19
 -12  -1  -2   -0.09    0.18
  12   1   2    0.07    0.16
  12   1   2   -0.19    0.17
 -12   1  -2    0.22    0.14
 -13  -1  -2    0.42    0.19
  13  -1   2    0.54    0.15
 -13   1  -2    0.64    0.15
  13   1   2    0.44    0.17
  13   1   2    0.46    0.16
  13  -2  -2    0.01    0.12
  13  -2  -2   -0.10    0.13
 -13  -2   2    0.09    0.21
  13   2  -2    0.16    0.18
  13   2  -2   -0.51    0.21
  12  -2  -2    2.81    0.24
 -12  -2   2    3.27    0.36
  12  -2  -2    3.64    0.21
  12   2  -2    3.07    0.32
  12   2  -2    3.13    0.25
  11  -2  -2    3.11    0.20
 -11  -2   2    2.91    0.24
  11  -2  -2    2.88    0.22
  11   2  -2    2.78    0.22
  11   2  -2    2.51    0.21
  10  -2  -2    0.35    0.11
  10  -2  -2    0.60    0.11
 -10  -2   2    0.71    0.19
  10   2  -2    0.36    0.18
  10   2  -2    0.31    0.17
   9  -2  -2    9.47    0.31
  -9  -2   2    9.15    0.47
   9  -2  -2    9.88    0.32
   9   2  -2   10.21    0.39
   9   2  -2   10.15    0.41
  -8  -2   2    2.85    0.30
   8  -2  -2    3.02    0.19
   8  -2  -2    2.76    0.17
   8   2  -2    2.38    0.31
   8   2  -2    2.97    0.28
   7  -2  -2    5.66    0.21
   7  -2  -2    5.71    0.22
  -7  -2   2    5.74    0.31
   7   2  -2    5.66    0.30
   7   2  -2    5.70    0.29
  -6  -2   2   85.76    2.12
   6  -2  -2   83.72    2.08
   6  -2  -2   84.71    2.08
   6   2  -2   86.88    2.12
   6   2  -2   85.77    2.11
   5  -2  -2   29.99    0.74
   5  -2  -2   26.34    0.74
  -5  -2   2   30.17    0.78
  -5  -2   2   29.86    0.78
  -5   2   2   29.51    0.73
   5   2  -2   29.79    0.78
   5   2  -2   30.39    0.78
  -4  -2   2    5.42    0.27
   4  -2  -2    5.78    0.19
  -4  -2   2    5.45    0.26
   4   2  -2    5.64    0.26
   4   2  -2    5.54    0.26
  -4   2   2    5.33    0.18
  -3  -2   2    0.34    0.12
  -3  -2   2    0.25    0.13
   3   2  -2    0.40    0.13
   3   2  -2    0.27    0.12
  -2  -2   2    8.25    0.31
  -2  -2   2    8.47    0.30
   2   2  -2    8.55    0.30
  -2   2   2    8.52    0.25
  -1  -2   2   33.66    0.84
   1  -2  -2   33.04    0.83
  -1   2   2   33.39    0.83
   1   2  -2   33.45    0.84
   1   2  -2   32.30    0.84
   0  -2   2   24.16    0.63
   0  -2  -2   24.69    0.63
   0  -2   2   24.20    0.62
   0   2  -2   24.80    0.63
   0   2   2   23.94    0.63
   0   2  -2   24.65    0.63
   1  -2   2  288.81    6.89
  -1   2  -2  286.01    6.90
  -1   2  -2  286.51    6.89
   1   2   2  268.34    6.91
  -2  -2  -2  251.71    6.32
   2  -2   2  263.46    6.28
  -2   2  -2  266.81    6.27
   2   2   2  245.65    6.32
  -2   2  -2  261.96    6.28
   3  -2   2   87.70    2.16
  -3  -2  -2   90.04    2.19
   3   2   2   89.06    2.19
  -3   2  -2   89.57    2.16
  -4  -2  -2   69.72    1.74
   4  -2   2   70.18    1.70
   4   2   2   70.14    1.74
  -4   2  -2   70.31    1.70
   5  -2   2  126.05    3.05
  -5  -2  -2  125.26    3.08
  -5   2  -2  126.59    3.05
   5   2   2  124.92    3.08
   6  -2   2   12.51    0.34
  -6  -2  -2   12.37    0.41
   6   2   2   11.98    0.40
  -6   2  -2   12.22    0.33
  -7  -2  -2    6.57    0.32
   7  -2   2    5.80    0.21
   7  -2   2    5.93    0.22
  -7   2  -2    6.16    0.21
   7   2   2    6.89    0.31
   8  -2   2    3.02    0.17
  -8  -2  -2    2.89    0.30
   8  -2   2    3.34    0.18
  -8   2  -2    3.47    0.18
   8   2   2    3.39    0.27
   9  -2   2    1.59    0.17
  -9  -2  -2    1.49    0.31
   9  -2   2    1.49    0.12
  -9   2  -2    1.65    0.16
   9   2   2    1.49    0.19
   9   2   2    1.33    0.18
 -10  -2  -2    0.74    0.19
  10  -2   2    0.36    0.10
  10  -2   2    0.41    0.11
 -10   2  -2    0.75    0.10
  10   2   2    0.51    0.16
  10   2   2    0.56    0.18
  11  -2   2    1.48    0.13
 -11  -2  -2    1.29    0.21
  11  -2   2    1.36    0.12
  11   2   2    1.11    0.19
  11   2   2    1.05    0.18
  12  -2   2    0.24    0.11
  12  -2   2    0.21    0.13
 -12  -2  -2    0.17    0.21
  12   2   2    0.24    0.18
  12   2   2   -0.22    0.20
 -13  -2  -2    5.05    0.39
  13  -2   2    4.83    0.25
  13  -2   2    4.68    0.26
  13   2   2    4.34    0.36
  13   2   2    4.76    0.41
 -13  -3   2   -0.06    0.23
  13   3  -2    0.09    0.21
 -12  -3   2    0.01    0.21
  12   3  -2    0.02    0.18
  12   3  -2    0.23    0.19
 -11  -3   2    2.84    0.25
  11   3  -2    2.55    0.24
  11   3  -2    2.22    0.23
  10  -3  -2    6.79    0.22
  10  -3  -2    7.21    0.23
 -10  -3   2    6.90    0.40
  10   3  -2    7.24    0.39
  10   3  -2    7.47    0.38
   9  -3  -2    2.50    0.14
  -9  -3   2    2.60    0.23
   9  -3  -2    2.63    0.15
   9   3  -2    2.70    0.22
   9   3  -2    2.67    0.22
  -8  -3   2    0.31    0.18
   8  -3  -2    0.38    0.08
   8  -3  -2    0.44    0.08
   8   3  -2    0.70    0.17
   8   3  -2    0.07    0.16
   7  -3  -2    3.29    0.15
  -7  -3   2    3.11    0.30
   7  -3  -2    3.11    0.14
   7   3  -2    2.86    0.28
   7   3  -2    3.23    0.29
  -6  -3   2   16.37    0.53
   6  -3  -2   16.16    0.43
   6  -3  -2   18.16    0.43
   6   3  -2   17.07    0.52
   6   3  -2   16.92    0.52
   5  -3  -2   33.13    0.80
  -5  -3   2   32.45    0.87
   5  -3  -2   32.70    0.80
   5   3  -2   32.13    0.86
   5   3  -2   32.27    0.86
  -4  -3   2   25.62    0.69
  -4  -3   2   25.57    0.70
   4  -3  -2   25.44    0.63
   4   3  -2   24.94    0.69
   4   3  -2   25.78    0.70
  -4   3   2   25.54    0.63
  -3  -3   2   42.18    1.08
  -3  -3   2   42.54    1.09
   3   3  -2   43.60    1.08
   3   3  -2   41.96    1.09
  -2  -3   2    1.17    0.14
   2   3  -2    1.06    0.13
  -2   3   2    1.24    0.14
   1  -3  -2  150.85    3.78
  -1  -3   2  157.37    3.79
  -1  -3   2  157.83    3.79
   1   3  -2  154.82    3.79
  -1   3   2  157.39    3.78
   1   3  -2  156.91    3.79
   0  -3   2  314.30    7.68
   0  -3  -2  302.46    7.69
   0  -3   2  312.55    7.69
   0   3  -2  311.11    7.70
   0   3   2  305.64    7.68
   0   3  -2  337.39    7.69
  -1  -3  -2   29.06    0.75
   1  -3   2   29.15    0.73
   1  -3   2   27.83    0.73
   1   3   2   28.30    0.75
  -1   3  -2   28.52    0.73
  -1   3  -2   29.70    0.73
  -2  -3  -2   23.38    0.65
   2  -3   2   23.83    0.60
   2   3   2   24.10    0.65
  -2   3  -2   23.75    0.61
  -2   3  -2   24.20    0.60
   3  -3   2   19.39    0.50
  -3  -3  -2   19.80    0.56
   3   3   2   19.52    0.55
  -3   3  -2   19.57    0.50
  -3   3  -2   19.71    0.49
  -4  -3  -2    4.10    0.27
   4  -3   2    4.21    0.14
   4   3   2    3.71    0.26
  -5  -3  -2   19.44    0.58
   5   3   2   20.52    0.58
  -6  -3  -2    2.80    0.28
   6   3   2    2.76    0.26
  -7  -3  -2   26.63    0.76
   7   3   2   27.41    0.75
   7   3   2   26.49    0.75
  -8  -3  -2    1.53    0.20
   8   3   2    1.69    0.19
   8   3   2    1.62    0.19
  -9  -3  -2   14.36    0.51
   9   3   2   13.32    0.50
   9   3   2   14.57    0.50
 -10  -3  -2    1.23    0.21
  10   3   2    1.04    0.20
  10   3   2    1.08    0.20
 -11  -3  -2    0.45    0.21
  11   3   2    0.48    0.19
  11   3   2    0.12    0.19
 -12  -3  -2    0.02    0.21
  12   3   2    0.13    0.18
  12   3   2   -0.22    0.19
 -13  -3  -2   -0.23    0.21
  13   3   2   -0.08    0.22
 -13  -4   2   -0.07    0.24
  13   4  -2    0.82    0.25
 -12  -4   2    0.25    0.23
  12   4  -2    0.41    0.22
  12   4  -2    0.00    0.22
 -11  -4   2    1.49    0.24
  11   4  -2    1.36    0.23
  11   4  -2    0.98    0.21
 -10  -4   2    5.12    0.39
  10   4  -2    4.92    0.37
  10   4  -2    4.60    0.34
  -9  -4   2    0.15    0.20
   9   4  -2    0.17    0.18
   9   4  -2    0.24    0.17
  -8  -4   2   15.33    0.63
   8   4  -2   18.03    0.57
   8   4  -2   17.08    0.56
  -7  -4   2    0.86    0.19
   7   4  -2    0.74    0.18
   7   4  -2    0.65    0.17
  -6  -4   2    3.08    0.32
   6   4  -2    3.67    0.30
   6   4  -2    3.14    0.29
  -5  -4   2    1.02    0.17
   5   4  -2    1.09    0.17
   5   4  -2    0.94    0.16
  -4  -4   2    0.76    0.15
   4   4  -2    0.85    0.14
  -3  -4   2    7.98    0.34
  -3  -4   2    8.01    0.32
  -3   4   2    7.91    0.24
   3   4  -2    7.91    0.32
   3   4  -2    8.27    0.33
   2  -4  -2    2.02    0.17
  -2  -4   2    1.94    0.22
  -2  -4   2    1.92    0.17
   2   4  -2    1.44    0.14
   2   4  -2    1.69    0.14
  -2   4   2    1.78    0.16
   1  -4  -2    0.26    0.11
  -1  -4   2    0.34    0.12
  -1  -4   2    0.38    0.14
   1   4  -2    0.16    0.13
  -1   4   2    0.31    0.11
   1   4  -2    0.16    0.12
   0  -4   2   73.79    1.83
   0  -4  -2   74.39    1.83
   0  -4   2   74.03    1.82
   0   4  -2   73.69    1.82
   0   4   2   74.39    1.83
   0   4  -2   73.99    1.83
   1  -4   2    9.42    0.30
   1  -4   2    9.11    0.31
   1   4   2    9.76    0.34
  -1   4  -2    9.67    0.30
  -1   4  -2    9.68    0.31
   2  -4   2   79.75    1.95
  -2  -4  -2   79.78    1.98
   2  -4   2   78.78    1.95
  -2   4  -2   79.02    1.95
  -2   4  -2   80.05    1.95
   2   4   2   80.86    1.98
   3  -4   2   17.11    0.44
   3   4   2   16.45    0.50
  -3   4  -2   16.65    0.43
   4  -4   2    2.77    0.12
  -4  -4  -2    2.40    0.26
   4   4   2    3.12    0.26
   5   4   2   12.72    0.43
  -6  -4  -2    0.88    0.19
   6   4   2    0.68    0.17
  -7  -4  -2    0.54    0.19
   7   4   2    0.17    0.17
   7   4   2   -0.06    0.17
  -8  -4  -2    6.15    0.39
   8   4   2    6.12    0.36
   8   4   2    6.13    0.37
  -9  -4  -2    0.33    0.20
   9   4   2    0.23    0.18
   9   4   2   -0.15    0.19
 -10  -4  -2    8.98    0.45
  10   4   2    9.27    0.42
  10   4   2    8.79    0.44
 -11  -4  -2    0.16    0.22
  11   4   2    0.28    0.21
  11   4   2    0.02    0.18
 -12  -4  -2    2.96    0.28
  12   4   2    3.51    0.27
  12   4   2    2.85    0.29
 -13  -4  -2    0.09    0.22
  13   4   2    0.05    0.24
 -12  -5   2    4.51    0.45
  12   5  -2    4.85    0.44
 -11  -5   2    3.17    0.29
  11   5  -2    2.44    0.25
  11   5  -2    3.46    0.29
 -10  -5   2   36.50    1.04
  10   5  -2   36.32    1.03
  10   5  -2   36.75    1.04
  -9  -5   2    0.62    0.22
   9   5  -2    0.69    0.20
   9   5  -2    0.57    0.19
  -8  -5   2    1.31    0.23
   8   5  -2    1.30    0.22
   8   5  -2    1.34    0.21
  -7  -5   2   -0.08    0.19
   7   5  -2   -0.27    0.18
   7   5  -2    0.06    0.18
  -6  -5   2    3.54    0.34
   6   5  -2    3.21    0.31
   6   5  -2    2.96    0.31
   5  -5  -2    4.04    0.16
  -5  -5   2    3.86    0.33
   5   5  -2    4.02    0.31
   5   5  -2    3.81    0.31
   4  -5  -2    1.32    0.14
  -4  -5   2    1.08    0.18
   4   5  -2    1.02    0.16
   4   5  -2    1.03    0.16
  -4   5   2    1.21    0.13
  -4   5   2    1.50    0.12
  -3  -5   2    9.45    0.37
   3  -5  -2    7.43    0.34
  -3   5   2    9.75    0.28
   3   5  -2    8.94    0.35
  -2  -5   2    8.39    0.33
   2  -5  -2    8.51    0.29
  -2  -5   2    8.69    0.36
  -2   5   2    8.56    0.28
   2   5  -2    9.48    0.34
   2   5  -2    8.38    0.33
   1  -5  -2  220.16    5.46
  -1  -5   2  221.89    5.47
  -1  -5   2  227.75    5.46
  -1   5   2  228.46    5.45
   1   5  -2  227.36    5.47
   1   5  -2  222.36    5.46
   0  -5  -2  143.22    3.52
   0  -5   2  138.49    3.52
   0  -5   2  147.19    3.53
   0   5  -2  146.41    3.52
   0   5  -2  145.12    3.52
   0   5   2  145.06    3.52
   1  -5   2    1.82    0.19
   1  -5   2    1.93    0.21
  -1  -5  -2    1.77    0.16
  -1   5  -2    1.50    0.13
  -1   5  -2    1.77    0.19
   1   5   2    1.92    0.16
   2  -5   2   74.65    1.84
   2  -5   2   73.95    1.84
  -2  -5  -2   76.92    1.87
  -2   5  -2   74.77    1.84
   2   5   2   74.00    1.87
  -2   5  -2   74.89    1.84
   3  -5   2    0.29    0.09
  -3  -5  -2    0.43    0.15
  -3   5  -2    0.33    0.09
   3   5   2    0.53    0.16
  -3   5  -2    0.23    0.08
  -4  -5  -2   18.46    0.57
  -4   5  -2   18.42    0.47
   4   5   2   18.49    0.56
  -4   5  -2   17.79    0.47
  -5  -5  -2   13.05    0.47
   5   5   2   11.99    0.46
  -6  -5  -2   13.11    0.49
   6   5   2   12.36    0.48
   6   5   2   13.25    0.47
  -7  -5  -2   10.94    0.54
   7   5   2   11.54    0.46
   7   5   2   11.39    0.46
  -8  -5  -2    7.66    0.42
   8   5   2    7.11    0.40
   8   5   2    7.98    0.41
  -9  -5  -2   10.13    0.47
   9   5   2    9.94    0.47
   9   5   2    9.58    0.43
 -10  -5  -2    0.57    0.22
  10   5   2    0.63    0.22
  10   5   2    0.33    0.20
 -11  -5  -2    1.97    0.28
  11   5   2    1.88    0.23
  11   5   2    2.34    0.26
 -12  -5  -2    1.76    0.28
  12   5   2    2.15    0.28
 -12  -6   2    0.80    0.28
  12   6  -2   -0.03    0.26
 -11  -6   2    1.52    0.26
  11   6  -2    1.15    0.26
  11   6  -2    1.06    0.25
 -10  -6   2    0.11    0.23
  10   6  -2    0.26    0.19
  10   6  -2    0.46    0.24
  -9  -6   2    0.48    0.23
   9   6  -2    0.47    0.20
  -8  -6   2    0.03    0.21
   8   6  -2    0.42    0.21
   8   6  -2   -0.03    0.20
  -7  -6   2    0.33    0.22
   7   6  -2    0.29    0.21
   7   6  -2    0.10    0.20
  -6  -6   2   12.84    0.52
   6   6  -2   13.06    0.50
   6   6  -2   13.25    0.51
   5  -6  -2   -0.04    0.08
  -5  -6   2   -0.09    0.19
   5   6  -2   -0.17    0.17
   5   6  -2    0.18    0.19
  -4  -6   2    6.04    0.36
   4   6  -2    5.39    0.34
  -4   6   2    6.22    0.22
  -4   6   2    6.37    0.22
   4   6  -2    5.91    0.35
   3  -6  -2    0.16    0.10
  -3  -6   2    0.21    0.16
   3   6  -2    0.26    0.16
  -3   6   2    0.31    0.10
  -3   6   2    0.10    0.10
   3   6  -2    0.30    0.17
   2  -6  -2    0.22    0.11
  -2  -6   2    0.42    0.16
   2   6  -2    0.20    0.14
   2   6  -2    0.21    0.15
  -2   6   2    0.31    0.11
   1  -6  -2   31.92    0.84
  -1  -6   2   32.83    0.86
   1   6  -2   32.07    0.85
   1   6  -2   32.05    0.86
  -1   6   2   31.91    0.84
   0  -6   2   51.08    1.32
   0  -6  -2   52.00    1.32
   0   6   2   51.02    1.32
   0   6  -2   53.11    1.31
   0   6  -2   52.62    1.32
  -1  -6  -2   35.07    0.93
   1  -6   2   34.97    0.91
   1   6   2   36.25    0.93
  -1   6  -2   34.24    0.90
  -1   6  -2   35.22    0.91
   2  -6   2    2.80    0.22
  -2  -6  -2    3.34    0.28
  -2   6  -2    3.02    0.20
  -2   6  -2    2.99    0.20
   2   6   2    2.98    0.27
   3  -6   2   15.73    0.45
   3   6   2   16.29    0.52
  -3   6  -2   16.07    0.44
  -3   6  -2   15.90    0.45
  -4  -6  -2    9.38    0.41
   4   6   2    8.66    0.39
  -4   6  -2    8.48    0.26
  -4   6  -2    8.63    0.27
   4   6   2    8.45    0.39
  -5  -6  -2    4.53    0.36
   5   6   2    5.00    0.34
   5   6   2    5.14    0.36
  -6  -6  -2    0.07    0.21
   6   6   2    0.13    0.19
   6   6   2    0.20    0.19
  -7  -6  -2   11.43    0.50
   7   6   2   11.84    0.49
   7   6   2   12.09    0.49
  -8  -6  -2   15.30    0.58
   8   6   2   15.35    0.57
   8   6   2   16.22    0.59
  -9  -6  -2    0.63    0.23
   9   6   2    0.54    0.21
 -10  -6  -2    6.65    0.47
  10   6   2    7.14    0.42
  10   6   2    6.82    0.48
 -11  -6  -2    0.92    0.25
  11   6   2    0.13    0.31
  11   6   2    0.62    0.26
 -12  -6  -2    0.65    0.30
  12   6   2    0.63    0.27
 -11  -7   2    0.47    0.26
  11   7  -2    0.77    0.28
 -10  -7   2    0.42    0.25
  10   7  -2    0.55    0.22
  10   7  -2    0.15    0.26
  -9  -7   2    0.04    0.23
   9   7  -2   -0.15    0.19
   9   7  -2    0.28    0.25
  -8  -7   2   -0.35    0.23
   8   7  -2    0.06    0.20
   8   7  -2    0.20    0.22
  -7  -7   2    9.18    0.49
   7   7  -2    8.74    0.45
   7   7  -2    9.59    0.46
  -6  -7   2    1.06    0.25
   6   7  -2    1.01    0.21
  -5  -7   2   21.60    0.70
   5  -7  -2   21.87    0.58
  -5   7   2   21.85    0.56
  -5   7   2   22.57    0.56
   5   7  -2   21.41    0.68
   5   7  -2   20.96    0.73
  -4  -7   2    0.31    0.21
  -4   7   2    0.23    0.10
   4   7  -2    0.23    0.18
   4   7  -2    0.25    0.19
  -3  -7   2    1.57    0.21
   3  -7  -2    1.63    0.14
  -3   7   2    1.57    0.14
  -3   7   2    1.51    0.13
   3   7  -2    1.46    0.17
   3   7  -2    1.72    0.20
  -2  -7   2    1.91    0.20
   2  -7  -2    2.03    0.16
  -2   7   2    2.23    0.22
   2   7  -2    2.08    0.20
  -2   7   2    2.01    0.16
   2   7  -2    1.81    0.18
   1  -7  -2    6.31    0.31
  -1  -7   2    6.32    0.34
   1   7  -2    6.24    0.32
  -1   7   2    5.83    0.29
  -1   7   2    6.64    0.30
   1   7  -2    6.41    0.33
   0  -7  -2    9.03    0.37
   0  -7   2    8.54    0.37
   0   7   2    8.14    0.34
   0   7  -2    8.90    0.35
   0   7  -2    8.81    0.35
   0   7   2    8.97    0.36
   1  -7   2   12.05    0.41
  -1  -7  -2   11.55    0.44
   1   7   2   12.19    0.42
  -1   7  -2   11.81    0.40
  -1   7  -2   11.70    0.39
   1   7   2   12.11    0.43
  -2  -7  -2   42.88    1.13
   2  -7   2   41.54    1.09
  -2   7  -2   42.62    1.08
   2   7   2   42.16    1.11
   2   7   2   43.16    1.12
  -2   7  -2   41.57    1.08
   3  -7   2    4.49    0.24
  -3  -7  -2    4.76    0.37
   3   7   2    4.39    0.34
   3   7   2    4.90    0.33
  -3   7  -2    4.64    0.23
  -3   7  -2    4.63    0.24
  -4  -7  -2    6.43    0.39
   4   7   2    5.96    0.37
  -4   7  -2    5.68    0.23
   4   7   2    5.66    0.38
  -4   7  -2    5.63    0.23
  -5  -7  -2    0.41    0.21
   5   7   2    0.73    0.21
   5   7   2    0.83    0.22
  -6  -7  -2   14.98    0.57
   6   7   2   13.17    0.53
  -7  -7  -2   23.09    0.74
   7   7   2   22.18    0.73
   7   7   2   23.64    0.74
  -8  -7  -2    0.19    0.23
   8   7   2    0.79    0.21
   8   7   2    0.92    0.24
  -9  -7  -2    0.14    0.24
   9   7   2   -0.08    0.21
   9   7   2    0.25    0.25
 -10  -7  -2    0.17    0.24
  10   7   2    0.20    0.26
  10   7   2   -0.21    0.21
 -11  -7  -2    0.67    0.27
  11   7   2    0.06    0.28
  11   8  -2    0.41    0.29
 -10  -8   2    0.96    0.28
  10   8  -2    0.63    0.27
  -9  -8   2    0.86    0.28
   9   8  -2    0.30    0.23
   9   8  -2    0.72    0.26
  -8  -8   2    0.87    0.26
   8   8  -2    1.03    0.23
   8   8  -2    0.33    0.25
  -7  -8   2    8.00    0.51
   7   8  -2    8.47    0.45
   7   8  -2    8.77    0.47
   6  -8  -2   61.98    1.54
  -6  -8   2   62.81    1.66
   6   8  -2   64.22    1.65
   6   8  -2   61.30    1.64
   5  -8  -2   94.93    2.32
   5   8  -2   96.82    2.39
   5   8  -2   95.99    2.40
  -5   8   2   93.18    2.31
  -5   8   2   92.63    2.31
  -4  -8   2    1.92    0.25
   4  -8  -2    2.28    0.23
   4   8  -2    1.72    0.25
  -4   8   2    1.92    0.20
   4   8  -2    2.31    0.23
  -4   8   2    2.30    0.21
  -3  -8   2    0.16    0.20
   3  -8  -2    0.34    0.14
   3   8  -2    0.51    0.22
   3   8  -2    0.27    0.19
  -3   8   2    0.29    0.13
  -3   8   2    0.35    0.12
  -2  -8   2    0.66    0.20
   2  -8  -2    0.56    0.15
   2   8  -2    0.46    0.19
  -2   8   2    0.75    0.15
   2   8  -2    1.13    0.19
  -2   8   2    0.57    0.14
   1  -8  -2    0.69    0.17
  -1  -8   2    0.80    0.19
  -1   8   2    0.63    0.16
   1   8  -2    0.81    0.18
  -1   8   2    0.79    0.16
   1   8  -2    0.72    0.18
   0  -8   2    2.77    0.21
   0  -8  -2    2.35    0.20
   0   8  -2    2.55    0.28
   0   8   2    2.20    0.19
   0   8   2    2.61    0.20
   0   8  -2    2.53    0.20
   1  -8   2    2.97    0.30
  -1  -8  -2    3.39    0.33
  -1   8  -2    2.73    0.28
  -1   8  -2    3.18    0.27
   1   8   2    3.42    0.31
   1   8   2    3.09    0.31
  -2  -8  -2    6.70    0.40
   2  -8   2    6.10    0.31
   2   8   2    5.63    0.38
  -2   8  -2    6.52    0.30
   2   8   2    6.74    0.38
  -2   8  -2    6.11    0.30
  -3  -8  -2    3.84    0.38
   3  -8   2    3.22    0.25
   3   8   2    3.47    0.35
   3   8   2    3.50    0.37
  -3   8  -2    3.07    0.24
  -3   8  -2    3.18    0.24
  -4  -8  -2  204.88    4.90
   4   8   2  187.16    5.01
   4   8   2  199.03    4.88
  -4   8  -2  203.15    4.82
  -5  -8  -2   26.86    0.94
  -5   8  -2   27.72    0.71
   5   8   2   27.92    0.84
   5   8   2   28.80    0.84
  -5   8  -2   28.32    0.71
  -6  -8  -2   17.50    0.65
   6   8   2   17.44    0.62
   6   8   2   16.91    0.63
  -7  -8  -2    1.10    0.25
   7   8   2    1.24    0.26
   7   8   2    1.14    0.23
  -8  -8  -2    1.67    0.26
   8   8   2    1.95    0.25
   8   8   2    1.79    0.27
  -9  -8  -2    1.47    0.29
   9   8   2    1.11    0.25
   9   8   2    1.69    0.29
 -10  -8  -2    0.25    0.26
  10   8   2    0.68    0.28
  11   8   2    0.89    0.29
 -10  -9   2    0.96    0.46
  -9  -9   2   -0.28    0.26
   9   9  -2    0.29    0.27
   9   9  -2    0.16    0.33
  -8  -9   2    0.93    0.28
   8   9  -2    0.62    0.23
   8   9  -2    0.91    0.27
  -7  -9   2    1.30    0.28
   7   9  -2    1.66    0.24
   7   9  -2    0.87    0.24
  -6  -9   2   14.18    0.62
   6  -9  -2   14.43    0.41
   6   9  -2   14.95    0.58
   6   9  -2   14.07    0.61
   5  -9  -2    0.61    0.15
  -5  -9   2    0.90    0.26
  -5   9   2    0.97    0.11
   5   9  -2    0.81    0.21
   5   9  -2    0.96    0.25
  -4  -9   2    1.22    0.26
   4  -9  -2    1.19    0.14
   4   9  -2    1.21    0.23
  -4   9   2    1.33    0.14
  -4   9   2    1.26    0.14
   4   9  -2    1.30    0.22
  -3  -9   2    0.35    0.23
   3  -9  -2    0.08    0.14
   3   9  -2    0.09    0.19
   3   9  -2    0.28    0.21
  -3   9   2    0.27    0.13
  -3   9   2    0.16    0.14
   2  -9  -2    9.03    0.39
  -2  -9   2    9.04    0.46
   2   9  -2    9.40    0.42
  -2   9   2    8.61    0.36
   2   9  -2    9.55    0.44
  -1  -9   2    2.13    0.23
   1  -9  -2    2.63    0.21
   1   9  -2    2.52    0.23
   1   9  -2    2.26    0.22
  -1   9   2    2.69    0.28
  -1   9   2    2.73    0.28
   0  -9   2    4.47    0.35
   0  -9  -2    4.24    0.35
   0   9   2    3.82    0.32
   0   9  -2    3.80    0.32
   0   9  -2    4.14    0.32
   0   9   2    3.95    0.32
   1  -9   2    0.42    0.18
  -1  -9  -2    0.29    0.20
  -1   9  -2    0.23    0.16
   1   9   2    0.50    0.18
   1   9   2    0.24    0.19
  -1   9  -2    0.46    0.17
   2  -9   2    1.89    0.19
  -2  -9  -2    1.82    0.23
   2   9   2    2.04    0.23
  -2   9  -2    2.17    0.18
   2   9   2    1.89    0.22
   3  -9   2   -0.07    0.14
  -3  -9  -2    0.30    0.22
  -3   9  -2    0.06    0.13
   3   9   2    0.25    0.19
  -3   9  -2    0.25    0.14
   3   9   2    0.38    0.21
  -4  -9  -2    6.28    0.60
   4  -9   2    7.43    0.30
  -4   9  -2    7.65    0.29
   4   9   2    5.78    0.44
  -4   9  -2    7.30    0.29
   4   9   2    6.54    0.42
  -5  -9  -2    0.23    0.25
  -5   9  -2    0.11    0.10
   5   9   2    0.24    0.23
   5   9   2    0.05    0.22
  -5   9  -2    0.04    0.09
  -6  -9  -2    0.99    0.27
   6   9   2    1.31    0.27
   6   9   2    1.30    0.23
  -7  -9  -2    1.98    0.28
   7   9   2    1.65    0.26
   7   9   2    1.68    0.27
  -8  -9  -2    0.60    0.27
   8   9   2   -0.09    0.25
   8   9   2    0.12    0.22
  -9  -9  -2    0.34    0.28
   9   9   2    0.83    0.27
  10   9   2   -0.09    0.27
  -9 -10   2    5.64    0.57
   9  10  -2    5.23    0.51
  -8 -10   2    0.97    0.31
   8  10  -2    0.71    0.28
   8  10  -2    1.19    0.28
  -7 -10   2   -0.51    0.28
   7  10  -2    0.19    0.25
   7  10  -2    0.21    0.23
   6 -10  -2    2.52    0.20
  -6 -10   2    2.47    0.31
   6  10  -2    1.91    0.26
   6  10  -2    2.24    0.29
  -5 -10   2    0.63    0.27
   5  10  -2    0.79    0.24
  -5  10   2    0.68    0.12
  -5  10   2    0.87    0.12
   5  10  -2    0.61    0.23
  -4 -10   2    0.81    0.26
   4 -10  -2    0.68    0.15
  -4  10   2    0.58    0.14
  -4  10   2    0.72    0.15
   4  10  -2    0.80    0.22
   4  10  -2    0.47    0.23
   3 -10  -2    0.10    0.15
  -3 -10   2    0.21    0.24
  -3  10   2    0.26    0.15
  -3  10   2   -0.12    0.14
   3  10  -2    0.07    0.20
   3  10  -2    0.38    0.22
  -2 -10   2    7.93    0.46
   2 -10  -2    8.19    0.37
   2  10  -2    7.75    0.43
  -2  10   2    7.60    0.36
   2  10  -2    8.11    0.42
  -2  10   2    8.10    0.35
   1 -10  -2    9.08    0.41
  -1 -10   2    8.28    0.46
  -1  10   2    8.40    0.38
   1  10  -2    8.50    0.42
   1  10  -2    8.96    0.41
  -1  10   2    8.73    0.39
   0 -10   2    3.54    0.27
   0 -10  -2    3.86    0.37
   0  10   2    3.62    0.33
   0  10  -2    3.93    0.33
   0  10   2    3.63    0.33
   0  10  -2    3.87    0.32
  -1 -10  -2   15.20    0.56
   1 -10   2   14.13    0.52
   1  10   2   14.98    0.54
  -1  10  -2   15.01    0.50
  -1  10  -2   14.47    0.50
   1  10   2   14.18    0.52
  -2 -10  -2    0.02    0.22
   2 -10   2   -0.01    0.17
   2  10   2    0.31    0.19
   2  10   2    0.06    0.20
  -2  10  -2    0.00    0.15
  -2  10  -2    0.08    0.16
   3 -10   2    0.48    0.16
  -3 -10  -2    0.89    0.25
  -3  10  -2    0.51    0.15
  -3  10  -2    0.66    0.15
   3  10   2    0.78    0.21
   3  10   2    0.80    0.24
   4 -10   2   11.98    0.40
  -4 -10  -2   11.08    0.58
   4  10   2   12.69    0.52
  -4  10  -2   12.24    0.41
   4  10   2   12.59    0.56
  -4  10  -2   12.28    0.40
  -5 -10  -2    0.39    0.26
   5  10   2    0.25    0.23
  -5  10  -2    0.36    0.12
  -5  10  -2    0.07    0.10
   5  10   2    0.35    0.25
  -6 -10  -2    3.34    0.32
   6  10   2    2.95    0.28
   6  10   2    3.66    0.31
  -7 -10  -2    0.53    0.29
   7  10   2    0.44    0.25
   7  10   2    1.01    0.27
  -8 -10  -2    1.41    0.31
   8  10   2    0.98    0.27
   8  10   2    1.22    0.32
  -7 -11   2    8.99    0.61
   7  11  -2    8.80    0.54
   7  11  -2    7.65    0.52
  -6 -11   2    0.69    0.32
   6 -11  -2    0.38    0.13
   6  11  -2    0.28    0.25
   6  11  -2    0.38    0.26
  -5 -11   2   -0.05    0.29
   5  11  -2   -0.21    0.23
  -5  11   2   -0.17    0.11
   5  11  -2    0.46    0.24
  -5  11   2   -0.09    0.12
  -4 -11   2    0.94    0.30
   4 -11  -2    0.91    0.16
   4  11  -2    1.14    0.24
  -4  11   2    0.93    0.16
   4  11  -2    0.72    0.23
  -4  11   2    0.89    0.17
   3 -11  -2    0.27    0.16
  -3 -11   2    0.15    0.28
   3  11  -2    0.44    0.22
  -3  11   2    0.01    0.14
  -3  11   2    0.21    0.16
   3  11  -2   -0.16    0.20
   2 -11  -2    0.08    0.17
  -2 -11   2    0.17    0.26
  -2  11   2    0.19    0.16
  -2  11   2    0.11    0.16
   2  11  -2    0.12    0.21
   2  11  -2    0.00    0.32
   1 -11  -2    6.80    0.39
  -1 -11   2    5.96    0.46
   1  11  -2    6.76    0.41
  -1  11   2    5.90    0.37
   1  11  -2    6.15    0.41
  -1  11   2    6.06    0.36
   0 -11   2    6.93    0.43
   0 -11  -2    6.02    0.43
   0  11  -2    6.63    0.39
   0  11   2    6.15    0.39
   0  11  -2    6.90    0.41
   0  11   2    7.07    0.40
  -1 -11  -2    0.10    0.23
   1 -11   2    0.02    0.19
  -1  11  -2    0.26    0.18
   1  11   2    0.09    0.20
   1  11   2    0.30    0.21
  -1  11  -2    0.16    0.18
  -2 -11  -2    1.99    0.28
   2 -11   2    2.09    0.21
  -2  11  -2    2.51    0.21
   2  11   2    2.20    0.24
  -2  11  -2    2.23    0.21
   2  11   2    2.42    0.27
  -3 -11  -2    1.12    0.27
   3 -11   2    1.45    0.18
   3  11   2    1.57    0.25
   3  11   2    1.79    0.25
  -3  11  -2    1.63    0.18
  -3  11  -2    1.40    0.17
   4 -11   2    0.24    0.13
  -4 -11  -2    0.64    0.28
  -4  11  -2    0.53    0.16
  -4  11  -2    0.37    0.15
   4  11   2    0.62    0.25
   4  11   2    0.46    0.23
  -5 -11  -2    2.05    0.31
   5  11   2    2.00    0.28
  -5  11  -2    2.91    0.21
   5  11   2    2.42    0.29
  -5  11  -2    2.47    0.19
  -6 -11  -2    1.58    0.31
   6  11   2    1.20    0.27
   6  11   2    0.84    0.25
  -7 -11  -2   -0.29    0.32
   7  11   2    0.41    0.25
   7  11   2   -0.10    0.26
  -5 -12   2    3.33    0.38
   5  12  -2    3.05    0.27
  -5  12   2    2.61    0.24
  -4 -12   2    0.87    0.33
   4 -12  -2    1.52    0.23
  -4  12   2    1.55    0.18
  -4  12   2    1.49    0.34
   4  12  -2    1.14    0.25
   4  12  -2    1.48    0.26
   3 -12  -2   -0.02    0.18
  -3 -12   2    0.08    0.27
  -3  12   2    0.08    0.16
  -3  12   2    0.18    0.22
   3  12  -2    0.19    0.22
   3  12  -2    0.40    0.23
   2 -12  -2    1.69    0.22
  -2 -12   2    1.64    0.30
   2  12  -2    1.47    0.24
  -2  12   2    1.69    0.20
   2  12  -2    1.03    0.25
  -2  12   2    1.21    0.22
   1 -12  -2    1.36    0.23
  -1 -12   2    1.63    0.27
  -1  12   2    1.18    0.20
   1  12  -2    1.02    0.23
   1  12  -2    1.67    0.24
  -1  12   2    1.58    0.23
   0 -12   2    2.53    0.28
   0 -12  -2    2.70    0.28
   0  12  -2    2.86    0.25
   0  12  -2    2.88    0.26
   0  12   2    2.58    0.25
   0  12   2    2.63    0.25
   1 -12   2    2.94    0.26
  -1 -12  -2    2.76    0.29
  -1  12  -2    2.85    0.24
   1  12   2    2.82    0.39
   1  12   2    2.60    0.25
  -1  12  -2    2.97    0.27
   2 -12   2    0.02    0.18
  -2 -12  -2    0.16    0.26
   2  12   2    0.05    0.24
  -2  12  -2    0.22    0.18
   2  12   2   -0.08    0.21
  -2  12  -2   -0.11    0.21
   3 -12   2    0.63    0.18
  -3 -12  -2    0.59    0.29
   3  12   2    0.78    0.23
  -3  12  -2    0.58    0.22
  -3  12  -2    0.34    0.17
   3  12   2    0.79    0.24
  -4 -12  -2    0.39    0.31
   4  12   2    0.44    0.26
  -4  12  -2    0.65    0.15
   4  12   2    0.62    0.26
  -5 -12  -2    5.63    0.60
   5  12   2    7.22    0.73
   5  12   2    5.42    0.46
  -5  12  -2    6.11    0.27
  -1 -13   2   -0.04    0.30
   1 -13  -2    0.25    0.25
   1  13  -2   -0.02    0.30
   1  13  -2    0.84    0.31
  -1  13   2    0.41    0.19
   0 -13   2    2.44    0.30
   0 -13  -2    2.81    0.32
   0  13   2    2.43    0.25
   0  13  -2    1.97    0.24
   0  13  -2    2.57    0.37
   0  13   2    3.01    0.35
   1 -13   2    0.11    0.27
  -1 -13  -2   -0.19    0.28
  -1  13  -2    0.30    0.20
   1  13   2    0.31    0.29
   1  13   2   -0.08    0.31
  13   0  -3   -0.16    0.13
  13   0  -3   -0.06    0.15
  12   0  -3    0.39    0.15
  12   0  -3   -0.05    0.14
  11   0  -3   -0.21    0.14
  11   0  -3   -0.20    0.16
  10   0  -3    0.01    0.15
  10   0  -3   -0.01    0.13
   9   0  -3    0.00    0.13
   8   0  -3   -0.05    0.13
   8   0  -3    0.04    0.14
  -7   0   3   -0.07    0.11
   7   0  -3   -0.06    0.12
   7   0  -3   -0.01    0.12
  -6   0   3    0.00    0.10
   6   0  -3   -0.15    0.10
   6   0  -3   -0.07    0.11
   5   0  -3   -0.07    0.10
  -5   0   3   -0.01    0.10
   5   0  -3    0.07    0.11
   4   0  -3   -0.01    0.10
  -4   0   3    0.04    0.10
   4   0  -3   -0.11    0.11
   3   0  -3   -0.07    0.10
   3   0  -3   -0.10    0.10
  -3   0   3   -0.02    0.10
  -2   0   3    0.00    0.10
   2   0  -3   -0.04    0.10
   1   0  -3   -0.11    0.09
  -1   0   3    0.03    0.09
   0   0  -3   -0.11    0.08
   0   0   3   -0.10    0.09
  -1   0  -3   -0.03    0.09
   1   0   3    0.04    0.09
  -2   0  -3   -0.04    0.10
   2   0   3    0.01    0.10
   3   0   3    0.00    0.10
  -3   0  -3   -0.08    0.10
   4   0   3   -0.02    0.10
  -4   0  -3   -0.06    0.10
   5   0   3   -0.08    0.10
  -5   0  -3    0.06    0.10
   6   0   3    0.03    0.11
  -6   0  -3   -0.09    0.12
   7   0   3   -0.05    0.12
  -7   0  -3   -0.15    0.12
  -8   0  -3    0.14    0.14
   8   0   3    0.08    0.13
   9   0   3    0.08    0.14
  -9   0  -3    0.03    0.15
  10   0   3   -0.17    0.13
  10   0   3   -0.40    0.15
 -10   0  -3   -0.02    0.16
  11   0   3   -0.16    0.14
 -11   0  -3   -0.11    0.17
  11   0   3   -0.06    0.14
 -12   0  -3   -0.04    0.17
  12   0   3   -0.02    0.13
  12   0   3   -0.12    0.14
  13   0   3   -0.15    0.13
  13   0   3   -0.23    0.16
 -13   0  -3    0.04    0.17
  13  -1  -3    0.49    0.16
  13  -1  -3    0.68    0.13
  13   1  -3    0.40    0.16
  13   1  -3    0.26    0.16
  12  -1  -3    7.26    0.29
  12  -1  -3    6.53    0.32
  12   1  -3    7.09    0.34
  12   1  -3    6.14    0.37
  11  -1  -3    9.31    0.35
  11  -1  -3    8.96    0.33
 -11  -1   3    9.64    0.41
  11   1  -3    8.59    0.37
  11   1  -3    8.67    0.40
  10  -1  -3    2.26    0.22
 -10  -1   3    2.52    0.21
  10  -1  -3    2.27    0.18
  10   1  -3    2.96    0.28
  10   1  -3    2.22    0.19
   9  -1  -3    0.58    0.14
  -9  -1   3    0.43    0.17
   9  -1  -3    0.67    0.13
   9   1  -3    0.48    0.15
   9   1  -3    0.45    0.17
   8  -1  -3    0.08    0.11
  -8  -1   3   -0.05    0.15
   8  -1  -3   -0.07    0.12
   8   1  -3    0.03    0.14
   8   1  -3   -0.06    0.15
  -7  -1   3    1.99    0.16
   7  -1  -3    1.81    0.20
   7  -1  -3    1.72    0.19
  -7   1   3    1.92    0.18
   7   1  -3    1.90    0.16
   7   1  -3    1.83    0.16
  -6  -1   3    2.72    0.23
  -6  -1   3    2.44    0.21
   6  -1  -3    2.36    0.19
   6  -1  -3    2.56    0.18
   6   1  -3    2.84    0.23
   6   1  -3    2.35    0.22
  -6   1   3    2.39    0.17
   5  -1  -3   40.84    1.04
  -5  -1   3   41.79    1.05
   5  -1  -3   41.40    1.04
  -5  -1   3   41.21    1.06
   5   1  -3   41.05    1.06
   5   1  -3   41.92    1.05
  -5   1   3   42.34    1.04
   4  -1  -3   10.20    0.31
   4  -1  -3   10.05    0.30
  -4  -1   3   10.00    0.34
  -4  -1   3   10.27    0.33
  -4   1   3   10.16    0.30
   4   1  -3    9.94    0.33
   4   1  -3    9.43    0.34
  -3  -1   3    5.42    0.25
  -3  -1   3    5.07    0.24
   3  -1  -3    5.18    0.20
  -3   1   3    5.26    0.20
   3   1  -3    4.83    0.24
   3   1  -3    4.92    0.25
   2  -1  -3  293.40    7.02
  -2  -1   3  296.31    7.05
   2   1  -3  273.87    7.03
   2   1  -3  294.77    7.05
  -2   1   3  278.62    7.01
   1  -1  -3   56.80    1.36
  -1  -1   3   55.87    1.36
  -1   1   3   53.89    1.36
   1   1  -3   55.87    1.37
   1   1  -3   54.08    1.36
   0  -1  -3    8.92    0.28
   0  -1   3    8.95    0.28
   0   1   3    8.52    0.28
   0   1  -3    8.34    0.27
   1  -1   3   11.32    0.32
  -1  -1  -3   10.55    0.34
   1   1   3   10.58    0.33
  -1   1  -3   11.34    0.32
  -2  -1  -3   10.60    0.35
   2  -1   3   10.66    0.32
  -2   1  -3   10.37    0.32
   2   1   3   10.90    0.34
   3  -1   3   22.68    0.59
  -3  -1  -3   22.95    0.61
   3   1   3   23.35    0.61
  -3   1  -3   22.84    0.59
  -4  -1  -3   64.85    1.60
   4  -1   3   63.60    1.58
   4   1   3   66.20    1.60
  -4   1  -3   63.73    1.59
  -5  -1  -3    0.21    0.12
   5  -1   3    0.13    0.09
   5   1   3    0.17    0.11
  -5   1  -3    0.26    0.10
   6  -1   3    0.78    0.11
  -6  -1  -3    0.74    0.14
   6   1   3    0.84    0.13
  -6   1  -3    0.77    0.11
  -7  -1  -3   28.71    0.77
   7  -1   3   28.01    0.74
   7   1   3   29.37    0.77
  -7   1  -3   28.56    0.74
  -8  -1  -3    6.80    0.33
   8  -1   3    6.28    0.27
   8   1   3    6.76    0.32
  -8   1  -3    6.68    0.28
   9  -1   3    8.24    0.31
  -9  -1  -3    8.43    0.37
   9  -1   3    7.83    0.30
   9   1   3    7.88    0.36
  -9   1  -3    8.22    0.32
   9   1   3    8.06    0.35
  10  -1   3   -0.07    0.12
 -10  -1  -3   -0.07    0.17
  10  -1   3   -0.05    0.12
  10   1   3   -0.31    0.15
  10   1   3    0.02    0.15
 -10   1  -3   -0.18    0.13
  11  -1   3    2.70    0.21
  11  -1   3    2.60    0.24
 -11  -1  -3    2.67    0.22
  11   1   3    2.88    0.22
  11   1   3    2.46    0.19
 -11   1  -3    2.64    0.27
 -12  -1  -3    0.93    0.20
  12  -1   3    0.81    0.16
  12  -1   3    0.70    0.14
  12   1   3    0.98    0.16
 -12   1  -3    0.88    0.16
  12   1   3    0.25    0.18
  13  -1   3    1.98    0.18
 -13  -1  -3    1.97    0.22
  13   1   3    1.78    0.18
  13   1   3    2.77    0.29
 -13   1  -3    1.87    0.17
  13  -2  -3    0.87    0.15
 -13  -2   3    0.96    0.22
  13  -2  -3    0.35    0.16
  13   2  -3    0.34    0.20
  13   2  -3    0.59    0.24
 -12  -2   3    0.02    0.20
  12  -2  -3   -0.03    0.13
  12  -2  -3   -0.07    0.12
  12   2  -3   -0.24    0.18
  12   2  -3    0.16    0.17
  11  -2  -3    0.01    0.12
 -11  -2   3    0.15    0.19
  11  -2  -3    0.10    0.11
  11   2  -3    0.23    0.17
  11   2  -3    0.10    0.17
 -10  -2   3    3.58    0.33
  10  -2  -3    3.49    0.24
  10   2  -3    3.85    0.31
  10   2  -3    2.99    0.33
   9  -2  -3    3.39    0.22
   9   2  -3    3.64    0.31
   9   2  -3    3.20    0.29
  -8  -2   3    1.71    0.19
   8  -2  -3    2.00    0.20
   8   2  -3    1.89    0.18
   8   2  -3    1.88    0.20
  -7  -2   3   37.61    1.01
   7  -2  -3   38.23    0.97
   7   2  -3   38.13    1.00
   7   2  -3   39.38    1.01
   6  -2  -3    8.26    0.27
  -6  -2   3    8.44    0.34
  -6  -2   3    8.02    0.32
   6   2  -3    8.66    0.32
  -6   2   3    7.28    0.32
   6   2  -3    8.34    0.33
  -5  -2   3   63.47    1.57
   5  -2  -3   63.43    1.54
  -5  -2   3   62.01    1.57
   5   2  -3   63.38    1.57
  -5   2   3   60.60    1.54
   5   2  -3   64.27    1.58
  -4  -2   3    2.79    0.22
   4   2  -3    2.29    0.23
  -4   2   3    2.88    0.15
  -3  -2   3   27.51    0.73
  -3  -2   3   28.69    0.73
   3  -2  -3   27.32    0.70
  -3   2   3   27.37    0.70
   3   2  -3   28.50    0.73
   3   2  -3   26.51    0.73
  -2  -2   3   13.15    0.41
   2  -2  -3   13.08    0.37
  -2  -2   3   13.51    0.40
   2   2  -3   13.12    0.40
  -2   2   3   13.24    0.37
   2   2  -3   13.16    0.41
  -1  -2   3    3.13    0.22
  -1  -2   3    3.11    0.21
   1  -2  -3    3.05    0.19
   1   2  -3    2.99    0.22
  -1   2   3    2.98    0.20
   0  -2  -3   30.45    0.78
   0  -2   3   30.45    0.77
   0   2  -3   29.58    0.77
   0   2  -3   31.28    0.78
   0   2   3   29.93    0.78
   1  -2   3   71.16    1.70
  -1  -2  -3   70.55    1.72
  -1   2  -3   67.62    1.71
   1   2   3   70.61    1.72
  -1   2  -3   67.99    1.70
  -2  -2  -3    9.35    0.33
   2  -2   3    9.64    0.28
   2   2   3    9.28    0.33
  -2   2  -3    8.94    0.28
  -3  -2  -3   74.45    1.78
   3  -2   3   69.71    1.75
   3   2   3   72.17    1.77
  -3   2  -3   70.03    1.75
  -4  -2  -3   51.37    1.30
   4  -2   3   52.36    1.27
  -4   2  -3   50.73    1.26
   4   2   3   51.68    1.30
   5  -2   3   30.93    0.76
  -5  -2  -3   29.79    0.80
   5   2   3   30.60    0.80
  -5   2  -3   29.61    0.76
   6  -2   3   46.02    1.12
  -6  -2  -3   44.62    1.16
  -6   2  -3   45.24    1.12
   6   2   3   45.21    1.16
   7  -2   3    7.04    0.25
  -7  -2  -3    7.00    0.33
  -7   2  -3    7.31    0.24
   7   2   3    6.93    0.33
  -8  -2  -3    0.11    0.17
   8  -2   3    0.42    0.11
   8   2   3    0.29    0.16
  -8   2  -3    0.40    0.10
  -9  -2  -3    1.13    0.23
   9  -2   3    1.32    0.13
   9  -2   3    1.53    0.13
  -9   2  -3    1.54    0.13
   9   2   3    1.55    0.19
   9   2   3    1.43    0.18
  10  -2   3    3.92    0.22
 -10  -2  -3    3.81    0.34
  10  -2   3    3.88    0.21
  10   2   3    4.18    0.33
  10   2   3    3.75    0.32
 -10   2  -3    3.99    0.20
  11  -2   3    0.82    0.12
  11  -2   3    0.97    0.13
 -11  -2  -3    0.91    0.21
 -11   2  -3    0.94    0.12
  11   2   3    0.88    0.18
  11   2   3    0.98    0.18
  12  -2   3    5.80    0.28
  12  -2   3    5.87    0.25
 -12  -2  -3    5.79    0.39
  12   2   3    6.22    0.36
  12   2   3    5.34    0.38
  13  -2   3    0.03    0.13
 -13  -2  -3   -0.09    0.22
  13   2   3    0.08    0.19
  13   2   3    0.34    0.22
 -13  -3   3    2.52    0.27
  13   3  -3    2.50    0.25
  12  -3  -3    1.36    0.12
  12  -3  -3    1.50    0.11
 -12  -3   3    1.17    0.24
  12   3  -3    1.35    0.20
  12   3  -3    1.73    0.22
 -11  -3   3    2.67    0.25
  11  -3  -3    2.66    0.21
  11  -3  -3    2.44    0.16
  11   3  -3    2.32    0.23
  11   3  -3    2.46    0.24
  10  -3  -3    5.58    0.21
 -10  -3   3    5.76    0.39
  10  -3  -3    5.94    0.22
  10   3  -3    5.46    0.36
  10   3  -3    5.75    0.37
   9  -3  -3    0.64    0.10
   9  -3  -3    0.60    0.09
  -9  -3   3    0.61    0.20
   9   3  -3    0.71    0.18
   9   3  -3    0.23    0.17
   8  -3  -3    0.47    0.10
  -8  -3   3    0.32    0.18
   8  -3  -3    0.46    0.09
   8   3  -3    0.31    0.16
   8   3  -3    0.44    0.17
  -7  -3   3    3.97    0.32
   7  -3  -3    3.79    0.17
   7  -3  -3    4.01    0.18
   7   3  -3    3.53    0.30
   7   3  -3    3.99    0.30
  -6  -3   3   17.59    0.55
   6  -3  -3   18.10    0.47
   6  -3  -3   17.74    0.47
  -6  -3   3   17.84    0.54
   6   3  -3   17.58    0.53
  -6   3   3   18.41    0.46
   6   3  -3   18.03    0.54
   5  -3  -3    2.47    0.14
  -5  -3   3    2.44    0.27
   5   3  -3    2.86    0.26
   5   3  -3    2.49    0.24
  -5   3   3    2.70    0.13
  -4  -3   3   26.19    0.68
  -4  -3   3   25.31    0.69
   4   3  -3   25.93    0.68
  -4   3   3   22.01    0.64
   4   3  -3   25.25    0.68
  -3  -3   3   19.74    0.53
  -3  -3   3   18.72    0.54
   3  -3  -3   16.74    0.50
   3   3  -3   18.91    0.53
  -3   3   3   18.64    0.48
  -2  -3   3    3.54    0.25
  -2  -3   3    3.32    0.23
   2  -3  -3    3.52    0.19
  -2   3   3    3.41    0.18
   2   3  -3    3.64    0.25
   2   3  -3    3.65    0.24
  -1  -3   3   38.17    0.99
  -1  -3   3   39.24    0.99
   1  -3  -3   37.60    0.98
  -1   3   3   38.60    0.98
   1   3  -3   40.52    0.99
   1   3  -3   38.80    0.99
   0  -3   3   89.75    2.16
   0  -3  -3   91.87    2.17
   0  -3   3   85.30    2.17
   0   3   3   88.54    2.17
   0   3  -3   87.83    2.17
   0   3  -3   86.77    2.16
   1  -3   3    9.26    0.30
  -1  -3  -3    9.02    0.33
  -1   3  -3    9.86    0.30
  -1   3  -3    9.19    0.30
   1   3   3    9.39    0.33
   2  -3   3    3.80    0.18
  -2  -3  -3    3.74    0.25
  -2   3  -3    3.63    0.17
   2   3   3    3.64    0.25
  -2   3  -3    3.69    0.18
   3  -3   3   23.34    0.59
  -3  -3  -3   22.42    0.64
   3   3   3   23.45    0.64
  -3   3  -3   23.51    0.59
  -3   3  -3   23.09    0.59
   4  -3   3    6.40    0.20
  -4  -3  -3    6.12    0.30
  -4   3  -3    5.97    0.20
  -4   3  -3    6.13    0.20
   4   3   3    6.28    0.30
   5  -3   3    2.69    0.13
  -5  -3  -3    2.20    0.19
   5   3   3    2.48    0.25
  -5   3  -3    2.65    0.13
   6  -3   3    0.58    0.07
  -6  -3  -3    0.74    0.16
   6   3   3    0.82    0.15
  -7  -3  -3    0.67    0.17
   7  -3   3    0.64    0.08
   7   3   3    0.74    0.17
   8  -3   3    1.47    0.13
  -8  -3  -3    1.44    0.20
   8  -3   3    1.66    0.14
   8   3   3    1.57    0.19
   9  -3   3    1.10    0.09
   9  -3   3    1.05    0.09
  -9  -3  -3    0.93    0.20
   9   3   3    1.06    0.19
   9   3   3    0.91    0.18
 -10  -3  -3    2.78    0.25
  10  -3   3    3.02    0.15
  10  -3   3    3.34    0.16
  10   3   3    3.02    0.23
  10   3   3    3.12    0.34
 -11  -3  -3    1.07    0.23
  11   3   3    1.62    0.21
  11   3   3    1.09    0.21
 -12  -3  -3    0.26    0.22
  12   3   3   -0.18    0.19
  12   3   3    0.32    0.19
 -13  -3  -3    0.34    0.22
  13   3   3    0.55    0.23
 -13  -4   3   -0.10    0.24
  13   4  -3   -0.16    0.24
 -12  -4   3    0.57    0.23
  12   4  -3    0.41    0.24
  12   4  -3    0.67    0.23
 -11  -4   3    1.35    0.24
  11   4  -3    0.42    0.19
  11   4  -3    0.76    0.23
 -10  -4   3    2.09    0.23
  10   4  -3    1.87    0.22
  10   4  -3    1.99    0.23
  -9  -4   3   -0.04    0.19
   9   4  -3    0.07    0.18
   9   4  -3    0.03    0.18
  -8  -4   3    0.07    0.19
   8   4  -3   -0.07    0.17
   8   4  -3   -0.17    0.18
   7  -4  -3    3.84    0.15
   7  -4  -3    3.78    0.16
  -7  -4   3    3.99    0.34
   7   4  -3    4.01    0.33
   7   4  -3    3.63    0.32
   6  -4  -3   13.58    0.36
   6  -4  -3   14.17    0.36
  -6  -4   3   13.47    0.48
   6   4  -3   12.36    0.46
   6   4  -3   13.52    0.47
   5  -4  -3   12.61    0.34
  -5  -4   3   12.37    0.44
  -5  -4   3   12.01    0.42
  -5   4   3   12.13    0.32
   5   4  -3   11.70    0.43
   5   4  -3   12.04    0.43
  -4  -4   3   42.60    1.06
  -4  -4   3   40.95    1.07
   4   4  -3   40.49    1.06
   4   4  -3   39.59    1.07
   3  -4  -3    4.19    0.19
  -3  -4   3    4.34    0.28
  -3  -4   3    4.32    0.27
   3   4  -3    3.88    0.27
  -3   4   3    4.13    0.18
   3   4  -3    4.12    0.26
   2  -4  -3   14.25    0.41
  -2  -4   3   13.87    0.44
  -2  -4   3   14.53    0.45
   2   4  -3   14.43    0.45
   2   4  -3   13.82    0.44
  -2   4   3   14.16    0.40
  -1  -4   3    1.00    0.12
  -1  -4   3    1.11    0.14
   1  -4  -3    1.15    0.13
   1   4  -3    0.98    0.13
  -1   4   3    1.26    0.12
   1   4  -3    1.10    0.14
   0  -4   3    5.76    0.27
   0  -4  -3    5.84    0.27
   0  -4   3    6.02    0.25
   0   4  -3    6.17    0.26
   0   4  -3    5.56    0.25
   0   4   3    4.94    0.26
  -1  -4  -3    1.98    0.16
   1  -4   3    1.96    0.18
   1  -4   3    2.03    0.20
   1   4   3    1.63    0.15
  -1   4  -3    2.10    0.18
  -1   4  -3    1.97    0.20
  -2  -4  -3    0.52    0.15
   2  -4   3    0.54    0.10
  -2   4  -3    0.58    0.10
  -2   4  -3    0.54    0.10
   2   4   3    0.53    0.14
   3  -4   3   34.93    0.88
  -3  -4  -3   36.36    0.93
  -3   4  -3   35.35    0.88
   3   4   3   34.77    0.93
  -3   4  -3   34.80    0.88
  -4  -4  -3   16.15    0.51
   4  -4   3   16.55    0.43
   4   4   3   16.35    0.50
  -4   4  -3   16.05    0.42
  -4   4  -3   16.48    0.43
  -5  -4  -3    0.32    0.14
   5  -4   3    0.23    0.07
   5   4   3    0.29    0.15
  -6  -4  -3    7.81    0.36
   6   4   3    7.59    0.37
  -7  -4  -3    2.58    0.23
   7   4   3    2.38    0.21
  -8  -4  -3    0.26    0.18
   8   4   3    0.23    0.18
   8   4   3   -0.06    0.18
  -9  -4  -3    4.52    0.38
   9   4   3    4.56    0.36
   9   4   3    5.33    0.35
 -10  -4  -3    9.45    0.46
  10   4   3    9.60    0.43
  10   4   3   10.15    0.46
 -11  -4  -3    0.55    0.23
  11   4   3    0.43    0.22
  11   4   3    0.19    0.18
 -12  -4  -3    0.83    0.23
  12   4   3    0.98    0.24
  12   4   3    0.04    0.27
 -13  -4  -3    0.08    0.24
  13   4   3    0.35    0.26
 -12  -5   3    0.60    0.26
  12   5  -3    0.70    0.25
 -11  -5   3    5.53    0.44
  11   5  -3    5.27    0.38
  11   5  -3    5.06    0.39
 -10  -5   3    2.99    0.28
  10   5  -3    2.84    0.25
  10   5  -3    3.14    0.27
  -9  -5   3    0.12    0.21
   9   5  -3    0.11    0.20
   9   5  -3   -0.32    0.18
  -8  -5   3    0.08    0.21
   8   5  -3    0.32    0.19
   8   5  -3    0.51    0.21
  -7  -5   3    0.06    0.35
   7   5  -3    0.12    0.18
   7   5  -3    0.16    0.19
  -6  -5   3   11.97    0.48
   6  -5  -3   12.19    0.32
   6   5  -3   11.77    0.46
   6   5  -3   10.82    0.67
   5  -5  -3    4.86    0.19
  -5  -5   3    4.92    0.35
  -5   5   3    4.82    0.17
   5   5  -3    4.93    0.32
   5   5  -3    4.54    0.32
  -4  -5   3    3.57    0.32
  -4  -5   3    3.82    0.29
   4   5  -3    3.85    0.30
   4   5  -3    4.23    0.30
  -3  -5   3   42.97    1.10
   3  -5  -3   41.81    1.06
  -3  -5   3   42.65    1.11
   3   5  -3   41.80    1.10
  -3   5   3   42.57    1.06
   3   5  -3   42.88    1.11
   2  -5  -3   20.46    0.56
  -2  -5   3   20.80    0.59
  -2  -5   3   20.65    0.60
   2   5  -3   20.99    0.60
  -2   5   3   20.00    0.55
   2   5  -3   21.14    0.59
   1  -5  -3   82.07    1.99
  -1  -5   3   81.79    2.01
  -1  -5   3   80.02    2.00
  -1   5   3   79.95    1.99
   1   5  -3   80.25    2.00
   1   5  -3   79.93    2.00
   0  -5  -3   57.94    1.45
   0  -5   3   56.32    1.45
   0  -5   3   58.42    1.44
   0   5  -3   59.07    1.45
   0   5   3   57.53    1.45
   0   5  -3   56.71    1.44
   1  -5   3   33.89    0.86
   1  -5   3   32.67    0.86
  -1  -5  -3   32.37    0.88
  -1   5  -3   34.06    0.86
   1   5   3   33.60    0.88
  -1   5  -3   33.30    0.86
   2  -5   3   18.20    0.50
   2  -5   3   18.03    0.50
  -2  -5  -3   18.43    0.54
  -2   5  -3   18.07    0.49
   2   5   3   17.71    0.54
  -2   5  -3   18.26    0.50
   3  -5   3    9.29    0.28
  -3  -5  -3    8.65    0.37
  -3   5  -3    8.91    0.28
   3   5   3    8.62    0.36
  -3   5  -3    9.01    0.29
  -4  -5  -3   19.73    0.60
   4  -5   3   20.20    0.52
   4   5   3   19.92    0.60
  -4   5  -3   19.97    0.51
  -4   5  -3   19.70    0.52
  -5  -5  -3   14.86    0.51
   5  -5   3   14.95    0.40
   5   5   3   15.25    0.51
  -6  -5  -3    0.53    0.20
   7   5   3    0.38    0.19
  -8  -5  -3    0.16    0.21
   8   5   3   -0.04    0.20
   8   5   3    0.01    0.18
  -9  -5  -3    5.67    0.41
   9   5   3    5.04    0.37
   9   5   3    5.62    0.40
 -10  -5  -3    7.24    0.45
  10   5   3    6.93    0.46
  10   5   3    6.86    0.40
 -11  -5  -3    1.19    0.26
  11   5   3    1.22    0.26
  11   5   3    0.84    0.20
 -12  -5  -3    1.13    0.27
  12   5   3    1.26    0.27
 -12  -6   3   -0.05    0.30
  12   6  -3    0.03    0.25
 -11  -6   3    3.66    0.31
  11   6  -3    4.11    0.45
  11   6  -3    3.49    0.38
 -10  -6   3    0.34    0.24
  10   6  -3    0.76    0.22
  10   6  -3    0.82    0.25
  -9  -6   3    2.57    0.27
   9   6  -3    2.77    0.27
   9   6  -3    3.22    0.26
  -8  -6   3    1.71    0.24
   8   6  -3    1.43    0.24
   8   6  -3    1.16    0.22
  -7  -6   3    1.05    0.23
   7   6  -3    1.25    0.22
   7   6  -3    0.74    0.22
   6  -6  -3    6.69    0.22
  -6  -6   3    7.07    0.42
   6   6  -3    6.87    0.40
   6   6  -3    6.95    0.39
   5  -6  -3    1.89    0.16
  -5  -6   3    1.57    0.22
  -5   6   3    2.09    0.14
  -5   6   3    1.89    0.14
   5   6  -3    1.85    0.22
   5   6  -3    1.39    0.20
  -4  -6   3   12.56    0.47
  -4   6   3   11.48    0.35
   4   6  -3   11.85    0.46
   4   6  -3   11.96    0.45
   3  -6  -3    2.92    0.20
  -3  -6   3    2.39    0.19
  -3  -6   3    2.61    0.21
   3   6  -3    2.44    0.20
  -3   6   3    2.79    0.20
   3   6  -3    2.85    0.29
  -2  -6   3   42.13    1.07
  -2  -6   3   40.71    1.08
   2  -6  -3   41.20    1.05
   2   6  -3   41.50    1.07
  -2   6   3   40.94    1.04
   2   6  -3   40.00    1.08
   1  -6  -3   38.95    1.01
  -1  -6   3   38.10    1.02
  -1  -6   3   39.65    1.03
   1   6  -3   39.05    1.03
  -1   6   3   39.41    1.01
   1   6  -3   40.46    1.02
   0  -6  -3    0.63    0.14
   0  -6   3    0.52    0.14
   0  -6   3    0.56    0.13
   0   6   3    0.49    0.13
   0   6  -3    0.53    0.13
   0   6  -3    0.60    0.13
  -1  -6  -3   27.40    0.76
   1  -6   3   27.86    0.73
   1  -6   3   27.78    0.74
  -1   6  -3   27.61    0.74
  -1   6  -3   27.41    0.73
   1   6   3   27.88    0.76
   2  -6   3   -0.05    0.11
  -2  -6  -3    0.24    0.16
   2  -6   3    0.18    0.12
   2   6   3    0.08    0.15
  -2   6  -3    0.08    0.11
  -2   6  -3    0.21    0.11
  -3  -6  -3   19.64    0.60
   3  -6   3   19.95    0.53
   3  -6   3   19.15    0.54
  -3   6  -3   19.49    0.53
  -3   6  -3   19.96    0.53
   3   6   3   19.62    0.60
  -4  -6  -3   17.47    0.57
   4  -6   3   17.53    0.47
  -4   6  -3   17.42    0.46
  -4   6  -3   17.00    0.47
   4   6   3   17.34    0.57
  -5  -6  -3    2.66    0.24
   5   6   3    3.04    0.33
  -6  -6  -3    0.01    0.19
   6   6   3    0.04    0.19
  -7  -6  -3    2.10    0.26
   7   6   3    2.03    0.24
   7   6   3    1.81    0.22
  -8  -6  -3   19.05    0.66
   8   6   3   18.85    0.64
   8   6   3   19.18    0.65
  -9  -6  -3    8.61    0.47
   9   6   3    8.15    0.52
   9   6   3    8.32    0.44
 -10  -6  -3    0.18    0.23
  10   6   3    0.08    0.20
  10   6   3    0.10    0.25
 -11  -6  -3    0.11    0.26
  11   6   3    0.27    0.25
  12   6   3    0.31    0.26
 -11  -7   3   -0.58    0.26
  11   7  -3   -0.03    0.27
 -10  -7   3    0.86    0.26
  10   7  -3    0.87    0.26
  10   7  -3    0.53    0.22
  -9  -7   3    2.00    0.27
   9   7  -3    1.65    0.26
   9   7  -3    1.77    0.24
  -8  -7   3    7.08    0.47
   8   7  -3    7.26    0.42
   8   7  -3    7.61    0.46
  -7  -7   3    4.30    0.42
   7   7  -3    5.01    0.41
   7   7  -3    5.30    0.39
   6  -7  -3   21.96    0.57
  -6  -7   3   21.75    0.72
   6   7  -3   21.38    0.70
   6   7  -3   22.08    0.77
  -5  -7   3   37.49    1.05
   5  -7  -3   37.76    0.94
   5   7  -3   36.97    1.03
  -5   7   3   36.60    0.93
  -5   7   3   37.35    0.93
   5   7  -3   36.88    1.03
  -4  -7   3    6.05    0.40
   4  -7  -3    6.01    0.25
  -4   7   3    5.73    0.24
   4   7  -3    5.72    0.37
   4   7  -3    5.94    0.38
  -4   7   3    5.60    0.25
   3  -7  -3    4.80    0.26
  -3  -7   3    4.85    0.37
  -3   7   3    4.62    0.24
   3   7  -3    4.82    0.33
   3   7  -3    5.26    0.35
   2  -7  -3    0.45    0.14
  -2  -7   3    0.35    0.18
   2   7  -3    0.30    0.16
   2   7  -3    0.26    0.16
  -2   7   3    0.59    0.13
   1  -7  -3    5.20    0.29
  -1  -7   3    5.25    0.34
   1   7  -3    5.08    0.32
   1   7  -3    4.80    0.30
  -1   7   3    4.82    0.28
   0  -7   3    2.59    0.28
   0  -7  -3    2.68    0.28
   0   7  -3    1.91    0.17
   0   7  -3    2.63    0.27
   0   7   3    1.92    0.17
  -1  -7  -3    0.12    0.16
   1  -7   3    0.14    0.15
  -1   7  -3    0.14    0.14
   1   7   3   -0.08    0.16
  -1   7  -3    0.10    0.14
   2  -7   3    3.98    0.27
  -2  -7  -3    4.65    0.33
  -2   7  -3    4.27    0.25
  -2   7  -3    4.33    0.25
   2   7   3    4.19    0.32
   3  -7   3    4.74    0.25
  -3  -7  -3    5.02    0.36
  -3   7  -3    4.75    0.25
  -3   7  -3    4.92    0.24
   3   7   3    5.03    0.36
  -4  -7  -3    2.27    0.24
   4   7   3    3.46    0.35
  -4   7  -3    2.37    0.19
  -5  -7  -3   69.52    1.81
  -5   7  -3   71.25    1.71
  -5   7  -3   70.94    1.72
   5   7   3   70.06    1.81
   5   7   3   69.04    1.80
  -6  -7  -3   13.70    0.54
   6   7   3   13.34    0.53
   6   7   3   12.75    0.60
  -7  -7  -3    1.90    0.26
   7   7   3    1.63    0.23
   7   7   3    1.64    0.23
  -8  -7  -3    0.12    0.23
   8   7   3   -0.07    0.21
   8   7   3    0.40    0.24
  -9  -7  -3    1.34    0.28
   9   7   3    1.48    0.28
   9   7   3    1.06    0.24
 -10  -7  -3   -0.36    0.24
  10   7   3    0.13    0.23
  10   7   3   -0.54    0.25
 -11  -7  -3    0.46    0.28
  11   7   3    0.51    0.29
 -10  -8   3    2.10    0.30
  10   8  -3    1.96    0.30
  -9  -8   3    0.16    0.26
   9   8  -3    0.12    0.23
   9   8  -3   -0.17    0.25
  -8  -8   3   -0.13    0.26
   8   8  -3   -0.05    0.23
   8   8  -3   -0.07    0.21
  -7  -8   3   -0.46    0.24
   7   8  -3   -0.29    0.22
   7   8  -3    0.21    0.21
   6  -8  -3   15.23    0.42
  -6  -8   3   14.92    0.61
   6   8  -3   14.45    0.57
   6   8  -3   14.82    0.58
  -5  -8   3   77.31    2.15
  -5   8   3   80.05    2.00
   5   8  -3   85.89    2.09
   5   8  -3   83.06    2.08
  -5   8   3   80.56    2.00
  -4  -8   3   31.19    0.91
   4  -8  -3   30.99    0.82
  -4   8   3   30.41    0.81
   4   8  -3   31.38    0.89
  -4   8   3   30.88    0.80
  -3  -8   3    4.72    0.40
   3  -8  -3    4.53    0.28
  -3   8   3    4.49    0.25
   3   8  -3    4.08    0.37
  -3   8   3    4.26    0.26
   3   8  -3    4.38    0.35
   2  -8  -3    2.49    0.27
  -2  -8   3    2.31    0.24
   2   8  -3    2.50    0.22
  -2   8   3    2.87    0.25
  -2   8   3    2.45    0.25
   1  -8  -3    0.69    0.16
  -1  -8   3    0.72    0.19
  -1   8   3    0.55    0.15
  -1   8   3    0.63    0.16
   1   8  -3    0.71    0.17
   1   8  -3    0.53    0.19
   0  -8   3    0.48    0.18
   0  -8  -3    0.45    0.17
   0   8   3    0.28    0.16
   0   8  -3    0.19    0.17
   0   8  -3    0.45    0.16
   1  -8   3    0.11    0.16
  -1  -8  -3    0.07    0.19
  -1   8  -3    0.03    0.16
   1   8   3    0.08    0.17
  -1   8  -3    0.29    0.15
   2  -8   3    0.12    0.15
  -2  -8  -3    0.24    0.19
   2   8   3   -0.08    0.18
  -2   8  -3    0.07    0.14
  -2   8  -3    0.18    0.14
  -3  -8  -3   36.33    1.00
   3  -8   3   35.08    0.93
   3   8   3   35.71    0.98
  -3   8  -3   35.30    0.92
  -3   8  -3   34.66    0.93
   3   8   3   36.51    1.00
  -4  -8  -3  176.23    4.31
   4   8   3  176.29    4.30
  -4   8  -3  172.10    4.24
   4   8   3  171.84    4.35
  -4   8  -3  174.02    4.23
  -5  -8  -3   25.49    0.81
  -5   8  -3   26.52    0.67
   5   8   3   26.41    0.80
   5   8   3   25.44    0.79
  -5   8  -3   26.30    0.67
  -6  -8  -3    2.34    0.27
   6   8   3    2.35    0.26
   6   8   3    2.80    0.26
  -7  -8  -3    1.78    0.28
   7   8   3    1.70    0.26
   7   8   3    1.89    0.25
  -8  -8  -3    0.30    0.24
   8   8   3    0.06    0.25
   8   8   3   -0.07    0.21
  -9  -8  -3    0.18    0.27
   9   8   3    0.17    0.24
   9   8   3    1.38    0.28
 -10  -8  -3    1.23    0.29
  10   8   3    0.68    0.29
  10   9  -3    0.94    0.30
  -9  -9   3    0.41    0.29
   9   9  -3    0.02    0.27
  -8  -9   3    1.80    0.31
   8   9  -3    1.78    0.26
   8   9  -3    2.46    0.29
  -7  -9   3    2.26    0.30
   7   9  -3    2.16    0.27
   7   9  -3    1.89    0.25
   6  -9  -3    3.79    0.21
  -6  -9   3    3.70    0.32
   6   9  -3    4.03    0.32
   6   9  -3    3.74    0.29
  -5  -9   3   16.97    0.66
   5   9  -3   17.69    0.64
  -5   9   3   17.68    0.48
   5   9  -3   17.21    0.62
  -5   9   3   16.59    0.47
  -4  -9   3    0.13    0.45
   4  -9  -3    0.09    0.13
  -4   9   3    0.40    0.13
   4   9  -3    0.14    0.22
   4   9  -3    0.21    0.20
  -4   9   3    0.34    0.12
  -3  -9   3    0.71    0.23
   3  -9  -3    0.66    0.15
   3   9  -3    0.69    0.21
   3   9  -3    0.78    0.19
  -3   9   3    0.93    0.14
  -2  -9   3    4.18    0.39
   2  -9  -3    3.82    0.31
   2   9  -3    3.92    0.34
  -2   9   3    3.77    0.29
  -2   9   3    3.88    0.28
   2   9  -3    3.78    0.36
  -1  -9   3    4.72    0.38
   1  -9  -3    4.94    0.34
  -1   9   3    5.09    0.31
   1   9  -3    4.95    0.36
   1   9  -3    4.57    0.35
  -1   9   3    4.83    0.32
   0  -9   3    0.68    0.20
   0  -9  -3    0.75    0.19
   0   9   3    1.05    0.18
   0   9  -3    0.87    0.18
   0   9   3    0.53    0.17
   0   9  -3    0.92    0.18
  -1  -9  -3    5.21    0.38
   1  -9   3    4.80    0.33
  -1   9  -3    4.47    0.32
   1   9   3    4.56    0.36
  -1   9  -3    5.27    0.32
   1   9   3    4.49    0.34
   2  -9   3    9.10    0.38
  -2  -9  -3    8.94    0.45
  -2   9  -3    7.78    0.41
  -2   9  -3    8.92    0.36
   2   9   3    8.34    0.43
   2   9   3    9.29    0.42
   3  -9   3    5.48    0.30
  -3  -9  -3    6.04    0.43
   3   9   3    5.96    0.38
  -3   9  -3    5.11    0.27
  -3   9  -3    5.10    0.29
   3   9   3    5.18    0.47
  -4  -9  -3    7.39    0.64
  -4   9  -3    8.68    0.32
   4   9   3    9.24    0.46
   4   9   3    8.86    0.48
  -4   9  -3    8.83    0.33
  -5  -9  -3   10.54    0.55
   5   9   3   10.93    0.52
  -5   9  -3   10.45    0.32
  -5   9  -3   10.54    0.33
   5   9   3   10.85    0.50
  -6  -9  -3    1.47    0.28
   6   9   3    0.94    0.26
   6   9   3    1.04    0.25
  -7  -9  -3    0.68    0.27
   7   9   3    0.73    0.24
   7   9   3    0.85    0.26
  -8  -9  -3    3.38    0.33
   8   9   3    2.79    0.28
   8   9   3    2.67    0.30
  -9  -9  -3    0.43    0.28
   9   9   3    1.01    0.30
  -8 -10   3    0.60    0.30
   8  10  -3    1.01    0.30
   8  10  -3    1.43    0.32
  -7 -10   3    6.19    0.54
   7  10  -3    4.77    0.45
   7  10  -3    5.09    0.47
  -6 -10   3    0.08    0.28
   6 -10  -3    0.49    0.13
   6  10  -3   -0.05    0.24
   6  10  -3    0.18    0.25
  -5 -10   3    3.37    0.32
   5  10  -3    3.36    0.32
   5  10  -3    3.22    0.29
  -5  10   3    2.96    0.20
  -5  10   3    2.65    0.24
   4 -10  -3    0.02    0.13
  -4 -10   3    0.19    0.26
  -4  10   3   -0.11    0.13
  -4  10   3    0.24    0.14
   4  10  -3    0.26    0.22
   4  10  -3    0.23    0.23
   3 -10  -3    2.12    0.19
  -3 -10   3    2.22    0.29
  -3  10   3    2.21    0.19
   3  10  -3    1.87    0.23
   3  10  -3    2.07    0.27
  -3  10   3    2.32    0.25
   2 -10  -3    0.89    0.19
  -2 -10   3    1.13    0.25
   2  10  -3    1.03    0.22
  -2  10   3    1.21    0.18
  -2  10   3    1.42    0.18
   2  10  -3    1.10    0.21
   1 -10  -3    3.21    0.33
  -1 -10   3    3.53    0.39
  -1  10   3    3.29    0.31
  -1  10   3    2.94    0.30
   1  10  -3    3.66    0.35
   1  10  -3    3.27    0.34
   0 -10  -3   14.91    0.56
   0 -10   3   16.12    0.56
   0  10   3   15.52    0.54
   0  10  -3   15.26    0.53
   0  10   3   15.57    0.53
   0  10  -3   14.82    0.53
  -1 -10  -3    0.95    0.22
   1 -10   3    0.83    0.19
  -1  10  -3    0.62    0.17
   1  10   3    0.77    0.20
   1  10   3    0.77    0.20
  -1  10  -3    0.75    0.17
  -2 -10  -3    6.15    0.44
   2 -10   3    5.92    0.34
   2  10   3    5.87    0.41
  -2  10  -3    6.05    0.33
   2  10   3    5.99    0.40
  -2  10  -3    6.53    0.34
   3 -10   3    0.36    0.15
  -3 -10  -3    0.63    0.42
  -3  10  -3    0.47    0.16
   3  10   3    0.56    0.22
  -3  10  -3    0.26    0.15
   3  10   3    0.60    0.23
  -4 -10  -3   -0.13    0.25
  -4  10  -3    0.06    0.13
   4  10   3    0.28    0.22
  -4  10  -3   -0.01    0.14
   4  10   3   -0.47    0.24
  -5 -10  -3    2.00    0.30
  -5  10  -3    1.80    0.18
   5  10   3    2.25    0.28
  -5  10  -3    2.27    0.20
   5  10   3    2.30    0.28
  -6 -10  -3    1.74    0.31
   6  10   3    1.19    0.25
   6  10   3    1.63    0.26
  -7 -10  -3    8.85    0.57
   7  10   3    8.88    0.52
   7  10   3    8.11    0.51
  -8 -10  -3   -0.46    0.29
   8  10   3    0.38    0.28
  -7 -11   3    2.36    0.36
   7  11  -3    2.99    0.35
   7  11  -3    3.19    0.33
   6 -11  -3    3.97    0.26
  -6 -11   3    4.25    0.37
   6  11  -3    3.42    0.31
   6  11  -3    4.71    0.47
  -5 -11   3    1.11    0.32
   5 -11  -3    1.27    0.19
   5  11  -3    1.63    0.26
   5  11  -3    1.16    0.25
  -5  11   3    1.26    0.14
  -5  11   3    1.41    0.15
   4 -11  -3   -0.08    0.13
  -4 -11   3    0.00    0.28
   4  11  -3    0.12    0.23
   4  11  -3    0.18    0.23
  -4  11   3   -0.06    0.14
  -4  11   3    0.13    0.16
   3 -11  -3    0.49    0.16
  -3 -11   3    0.27    0.26
  -3  11   3    0.41    0.16
   3  11  -3    0.48    0.22
  -3  11   3    0.34    0.17
   3  11  -3    0.47    0.23
   2 -11  -3    0.58    0.19
  -2 -11   3    0.32    0.26
   2  11  -3    0.35    0.23
  -2  11   3    0.43    0.18
  -2  11   3    0.50    0.17
   2  11  -3    0.34    0.21
  -1 -11   3   18.54    0.67
   1 -11  -3   18.43    0.63
  -1  11   3   19.21    0.60
   1  11  -3   18.45    0.64
   1  11  -3   18.68    0.63
  -1  11   3   18.79    0.61
   0 -11   3    4.05    0.40
   0 -11  -3    4.53    0.40
   0  11   3    4.00    0.36
   0  11  -3    3.98    0.36
   0  11  -3    3.62    0.36
   0  11   3    3.97    0.37
  -1 -11  -3    3.30    0.30
   1 -11   3    3.17    0.35
  -1  11  -3    3.18    0.33
   1  11   3    3.94    0.37
  -1  11  -3    4.02    0.33
   1  11   3    4.01    0.36
  -2 -11  -3    1.77    0.30
   2 -11   3    2.34    0.21
  -2  11  -3    2.17    0.20
   2  11   3    1.84    0.26
  -2  11  -3    2.41    0.20
   2  11   3    2.07    0.23
  -3 -11  -3    0.94    0.29
   3 -11   3    1.04    0.18
  -3  11  -3    1.34    0.18
  -3  11  -3    1.17    0.17
   3  11   3    1.24    0.23
   3  11   3    1.14    0.24
  -4 -11  -3    3.20    0.34
  -4  11  -3    3.56    0.30
   4  11   3    3.67    0.40
  -4  11  -3    3.58    0.27
   4  11   3    3.46    0.29
  -5 -11  -3    1.26    0.30
   5  11   3    1.32    0.27
  -5  11  -3    1.50    0.13
   5  11   3    1.65    0.28
  -5  11  -3    1.60    0.14
  -6 -11  -3    0.00    0.30
   6  11   3    0.30    0.24
   6  11   3    0.38    0.27
  -7 -11  -3    0.27    0.31
   7  11   3    0.06    0.26
   7  11   3    1.06    0.36
  -5 -12   3    3.26    0.38
  -5  12   3    2.93    0.24
   5  12  -3    3.35    0.30
  -4 -12   3   -0.06    0.31
   4  12  -3   -0.70    0.22
   4  12  -3    0.35    0.24
  -4  12   3    0.35    0.16
   3 -12  -3    1.94    0.22
  -3 -12   3    1.82    0.31
  -3  12   3    1.99    0.26
  -3  12   3    1.60    0.19
   3  12  -3    2.26    0.26
   3  12  -3    1.97    0.25
   2 -12  -3    2.28    0.22
  -2 -12   3    2.45    0.31
   2  12  -3    1.79    0.25
   2  12  -3    2.05    0.24
  -2  12   3    1.71    0.21
  -2  12   3    2.01    0.25
   1 -12  -3    0.24    0.20
  -1 -12   3    0.34    0.24
   1  12  -3    0.24    0.22
   1  12  -3    0.02    0.21
  -1  12   3   -0.06    0.18
  -1  12   3   -0.24    0.20
   0 -12  -3    2.59    0.27
   0 -12   3    2.82    0.28
   0  12   3    2.15    0.24
   0  12  -3    2.70    0.26
   0  12  -3    2.14    0.24
   0  12   3    2.39    0.24
   1 -12   3    1.75    0.24
  -1 -12  -3    1.83    0.27
   1  12   3    1.86    0.24
  -1  12  -3    2.03    0.22
  -1  12  -3    1.61    0.25
   1  12   3    1.99    0.30
  -2 -12  -3    0.57    0.26
   2 -12   3    0.08    0.19
  -2  12  -3   -0.05    0.21
   2  12   3    0.01    0.23
  -2  12  -3    0.20    0.18
   2  12   3    0.18    0.22
   3 -12   3    0.44    0.18
  -3 -12  -3    1.29    0.30
  -3  12  -3    1.05    0.23
   3  12   3    1.16    0.25
  -3  12  -3    0.92    0.18
   3  12   3    0.83    0.25
  -4 -12  -3    2.03    0.33
   4  12   3    2.72    0.28
   4  12   3    2.25    0.30
  -4  12  -3    2.51    0.27
  -5 -12  -3    0.55    0.34
  -5  12  -3    0.52    0.13
   5  12   3    0.88    0.25
  -1  13   3    0.97    0.22
   0 -13  -3    0.55    0.29
   0 -13   3    0.39    0.27
   0  13  -3    0.35    0.22
   0  13   3    0.53    0.22
  -1  13  -3    0.94    0.22
  13   0  -4    3.19    0.30
  13   0  -4    3.57    0.28
  12   0  -4    1.35    0.18
  12   0  -4    1.86    0.18
  11   0  -4  132.89    3.27
  11   0  -4  131.80    3.26
  10   0  -4   65.62    1.63
  10   0  -4   62.90    1.62
   9   0  -4    2.77    0.26
   9   0  -4    2.90    0.25
  -8   0   4   13.57    0.42
   8   0  -4   13.70    0.44
   8   0  -4   13.14    0.43
   7   0  -4    9.96    0.35
  -7   0   4    9.96    0.34
   7   0  -4   10.17    0.36
  -6   0   4   15.37    0.44
   6   0  -4   15.33    0.45
   6   0  -4   14.90    0.45
   5   0  -4   14.65    0.44
  -5   0   4   15.42    0.43
   5   0  -4   15.03    0.44
   4   0  -4    4.74    0.23
   4   0  -4    4.37    0.23
  -4   0   4    4.72    0.22
   3   0  -4    0.32    0.11
   3   0  -4    0.27    0.11
  -3   0   4    0.33    0.11
  -2   0   4 1000.00   23.73
   2   0  -4  954.35   23.73
   0   0  -4  287.44    7.01
   0   0   4  286.23    7.01
   1   0   4   87.41    2.14
  -1   0  -4   87.10    2.14
  -2   0  -4   42.62    1.11
   2   0   4   45.79    1.11
  -3   0  -4    2.48    0.20
   3   0   4    2.55    0.20
  -4   0  -4   47.43    1.19
   4   0   4   47.73    1.19
  -5   0  -4    2.54    0.21
   5   0   4    2.75    0.20
   6   0   4   20.17    0.56
  -6   0  -4   20.14    0.56
  -7   0  -4    6.75    0.30
   7   0   4    6.57    0.29
   8   0   4  329.91    8.02
  -8   0  -4  330.64    8.02
   9   0   4  107.47    2.69
  -9   0  -4  110.21    2.69
 -10   0  -4   19.70    0.67
  10   0   4   21.97    0.61
  10   0   4   22.38    0.62
  11   0   4    0.17    0.16
 -11   0  -4   -0.06    0.16
  11   0   4   -0.02    0.14
  12   0   4    2.25    0.18
  12   0   4    2.01    0.18
 -12   0  -4    2.24    0.20
  13   0   4    0.32    0.17
 -13   0  -4    0.12    0.18
  13   0   4   -0.06    0.16
  13  -1  -4    0.78    0.16
  13  -1  -4    0.26    0.14
  13   1  -4    0.79    0.18
  13   1  -4   -0.09    0.18
  12  -1  -4   13.57    0.44
  12  -1  -4   13.40    0.42
  12   1  -4   13.08    0.49
  12   1  -4   12.29    0.46
  11  -1  -4    1.59    0.16
  11  -1  -4    1.36    0.15
  11   1  -4    1.62    0.20
  11   1  -4    1.56    0.18
  10  -1  -4   10.99    0.37
  10  -1  -4   10.63    0.39
  10   1  -4   10.81    0.42
  10   1  -4   10.65    0.41
   9  -1  -4    1.48    0.19
   9  -1  -4    1.30    0.15
   9   1  -4    1.56    0.19
   9   1  -4    1.46    0.17
   8  -1  -4    1.41    0.15
  -8  -1   4    1.28    0.16
   8  -1  -4    1.25    0.14
  -8  -1   4    1.32    0.17
   8   1  -4    1.31    0.20
   8   1  -4    1.25    0.16
  -8   1   4    1.43    0.13
   7  -1  -4    6.15    0.27
  -7  -1   4    6.49    0.29
   7  -1  -4    5.55    0.26
  -7  -1   4    6.33    0.31
   7   1  -4    5.97    0.30
   7   1  -4    5.72    0.30
  -7   1   4    5.84    0.25
  -6  -1   4    6.38    0.28
   6  -1  -4    5.97    0.25
  -6  -1   4    6.31    0.30
   6  -1  -4    6.25    0.26
   6   1  -4    6.21    0.28
   6   1  -4    6.29    0.29
  -6   1   4    6.17    0.24
  -5  -1   4    9.25    0.34
   5  -1  -4    9.38    0.31
  -5  -1   4    9.44    0.33
   5  -1  -4    9.34    0.31
  -5   1   4    9.25    0.30
   5   1  -4    9.69    0.33
   5   1  -4    9.88    0.34
   3  -1  -4    1.21    0.12
  -3  -1   4    1.34    0.13
   3   1  -4    1.16    0.13
   3   1  -4    1.09    0.13
  -3   1   4    1.33    0.11
  -2  -1   4  398.74    9.61
   2  -1  -4  397.31    9.59
  -2   1   4  390.54    9.58
   2   1  -4  391.73    9.59
   2   1  -4  383.64    9.62
  -1  -1   4  267.35    6.36
   1  -1  -4  252.69    6.33
   1   1  -4  278.68    6.38
  -1   1   4  238.73    6.33
   0  -1  -4   25.10    0.66
   0  -1   4   25.32    0.65
   0   1   4   24.21    0.65
   0   1  -4   25.14    0.65
   1  -1   4    2.20    0.19
  -1  -1  -4    2.30    0.22
  -1   1  -4    2.17    0.19
   1   1   4    2.24    0.22
  -2  -1  -4    2.02    0.21
   2  -1   4    1.74    0.17
   2   1   4    1.86    0.21
  -2   1  -4    1.80    0.19
   3  -1   4   28.10    0.72
  -3  -1  -4   28.95    0.74
   3   1   4   28.23    0.74
  -3   1  -4   28.00    0.72
  -4  -1  -4   28.16    0.74
   4  -1   4   28.72    0.72
   4   1   4   28.25    0.74
  -4   1  -4   27.59    0.72
   5  -1   4    0.19    0.10
  -5  -1  -4    0.06    0.13
   5   1   4    0.07    0.12
  -5   1  -4    0.10    0.10
  -6  -1  -4    0.12    0.13
   6  -1   4    0.23    0.11
   6   1   4    0.30    0.12
  -6   1  -4    0.38    0.11
  -7  -1  -4    3.29    0.27
   7  -1   4    2.90    0.21
  -7   1  -4    3.21    0.22
   7   1   4    3.07    0.26
   8  -1   4    9.53    0.33
  -8  -1  -4    9.10    0.37
  -8   1  -4    8.97    0.33
   8   1   4    9.76    0.58
  -9  -1  -4    6.26    0.34
   9  -1   4    5.82    0.29
  -9   1  -4    6.08    0.29
   9   1   4    6.29    0.33
  10  -1   4    2.65    0.22
 -10  -1  -4    2.95    0.22
  10  -1   4    2.82    0.24
  10   1   4    2.79    0.30
  10   1   4    2.84    0.28
 -10   1  -4    2.54    0.25
  11  -1   4    1.86    0.16
  11  -1   4    1.66    0.15
 -11  -1  -4    1.56    0.20
 -11   1  -4    1.76    0.17
  11   1   4    1.60    0.19
  11   1   4    1.67    0.18
  12  -1   4    0.28    0.15
  12  -1   4    0.61    0.13
 -12  -1  -4    0.44    0.20
  12   1   4    0.63    0.17
 -12   1  -4    0.19    0.15
  12   1   4    0.77    0.17
  13  -1   4    0.31    0.15
 -13  -1  -4    0.33    0.20
  13   1   4    0.09    0.19
 -13   1  -4    0.20    0.15
  13   1   4    0.36    0.17
  13  -2  -4    1.03    0.15
  13   2  -4    1.31    0.28
  13   2  -4    1.27    0.22
  12  -2  -4    0.17    0.13
  12  -2  -4   -0.03    0.18
  12   2  -4    0.12    0.19
  12   2  -4    0.06    0.18
  11  -2  -4   13.05    0.41
 -11  -2   4   12.92    0.50
  11   2  -4   12.53    0.48
  11   2  -4   13.18    0.49
  10  -2  -4    0.35    0.12
 -10  -2   4    0.37    0.19
  10   2  -4    0.49    0.17
  10   2  -4    0.44    0.18
   9  -2  -4    1.54    0.15
  -9  -2   4    1.78    0.20
   9   2  -4    1.44    0.19
   9   2  -4    1.43    0.19
   8  -2  -4    0.34    0.12
  -8  -2   4    0.41    0.17
   8  -2  -4    0.47    0.12
   8   2  -4    0.48    0.15
  -8   2   4    0.35    0.11
   8   2  -4    0.61    0.16
  -7  -2   4    8.68    0.35
   7  -2  -4    8.61    0.29
  -7  -2   4    8.63    0.38
   7  -2  -4    8.95    0.30
  -7   2   4    8.87    0.29
   7   2  -4    8.61    0.36
   7   2  -4    8.35    0.36
  -6  -2   4    5.54    0.28
   6  -2  -4    5.32    0.22
   6  -2  -4    5.59    0.22
  -6  -2   4    4.76    0.30
   6   2  -4    4.98    0.29
  -6   2   4    5.15    0.21
   6   2  -4    5.39    0.29
   5  -2  -4   14.25    0.41
  -5  -2   4   14.29    0.44
  -5  -2   4   13.95    0.45
   5  -2  -4   14.36    0.40
   5   2  -4   14.83    0.45
   5   2  -4   14.14    0.44
  -5   2   4   14.46    0.40
  -4  -2   4   12.88    0.40
  -4  -2   4   12.44    0.41
   4  -2  -4   12.00    0.36
  -4   2   4   12.43    0.35
   4   2  -4   13.01    0.40
   4   2  -4   12.55    0.41
   3  -2  -4    1.47    0.11
  -3  -2   4    1.42    0.15
  -3  -2   4    1.59    0.14
   3   2  -4    1.11    0.13
  -3   2   4    1.54    0.16
   3   2  -4    1.12    0.14
  -2  -2   4   12.22    0.37
  -2  -2   4   11.45    0.38
   2  -2  -4   11.52    0.35
  -2   2   4   11.56    0.35
   2   2  -4   11.66    0.38
  -1  -2   4  115.94    2.74
   1  -2  -4  114.61    2.73
  -1   2   4  109.47    2.73
   1   2  -4  112.41    2.74
   1   2  -4  107.53    2.74
   0  -2   4    6.11    0.25
   0  -2  -4    5.77    0.26
   0   2  -4    6.02    0.26
   0   2  -4    6.03    0.25
   0   2   4    6.46    0.26
  -1  -2  -4    0.43    0.13
   1  -2   4    0.65    0.11
  -1   2  -4    0.64    0.11
   1   2   4    0.51    0.13
  -2  -2  -4   42.97    1.10
   2  -2   4   44.44    1.08
  -2   2  -4   43.48    1.08
   2   2   4   42.18    1.09
  -3  -2  -4    8.77    0.34
   3  -2   4    9.74    0.28
   3   2   4    9.39    0.33
  -3   2  -4    8.70    0.28
  -4  -2  -4    3.28    0.25
   4  -2   4    2.89    0.17
   4   2   4    3.35    0.24
  -4   2  -4    2.82    0.17
  -5  -2  -4    6.59    0.30
   5  -2   4    6.39    0.23
  -5   2  -4    6.36    0.23
   5   2   4    6.54    0.30
   6  -2   4    1.44    0.11
  -6  -2  -4    1.44    0.17
  -6   2  -4    1.30    0.11
   6   2   4    1.19    0.16
   7  -2   4    0.30    0.10
  -7  -2  -4    0.40    0.16
  -7   2  -4    0.24    0.11
   7   2   4    0.54    0.15
  -8  -2  -4   14.87    0.52
   8  -2   4   15.23    0.44
  -8   2  -4   15.41    0.44
   8   2   4   16.03    0.51
   9  -2   4    7.22    0.28
  -9  -2  -4    7.92    0.39
   9   2   4    7.86    0.38
  -9   2  -4    7.53    0.28
 -10  -2  -4    1.78    0.21
  10  -2   4    1.32    0.17
 -10   2  -4    1.72    0.14
  10   2   4    1.54    0.20
  10   2   4    1.67    0.20
  11  -2   4    0.17    0.12
 -11  -2  -4    0.04    0.19
  11  -2   4    0.26    0.12
  11   2   4   -0.11    0.17
  11   2   4   -0.02    0.18
 -11   2  -4    0.09    0.12
  12  -2   4    1.50    0.15
  12  -2   4    1.19    0.14
 -12  -2  -4    1.31    0.24
  12   2   4    1.18    0.19
  12   2   4    1.11    0.19
  13  -2   4    6.26    0.30
 -13  -2  -4    6.67    0.43
  13   2   4    7.81    0.59
  13   2   4    6.57    0.41
  13  -3  -4    0.40    0.13
 -13  -3   4    1.17    0.24
  13   3  -4    0.64    0.24
  12  -3  -4    0.45    0.11
  12  -3  -4    0.32    0.12
 -12  -3   4    0.70    0.23
  12   3  -4    0.30    0.18
  12   3  -4    0.18    0.21
 -11  -3   4    0.36    0.21
  11  -3  -4    0.16    0.11
  11  -3  -4    0.11    0.10
  11   3  -4   -0.15    0.19
  11   3  -4    0.20    0.19
  10  -3  -4    3.00    0.20
  10  -3  -4    2.83    0.18
 -10  -3   4    3.63    0.37
  10   3  -4    3.42    0.33
  10   3  -4    3.27    0.34
  -9  -3   4    0.18    0.19
   9  -3  -4    0.14    0.09
   9  -3  -4    0.08    0.10
   9   3  -4   -0.15    0.17
   9   3  -4    0.12    0.18
  -8  -3   4   -0.32    0.24
   8  -3  -4    0.04    0.11
   8  -3  -4    0.02    0.10
   8   3  -4   -0.25    0.17
   8   3  -4    0.14    0.17
   7  -3  -4    9.15    0.30
  -7  -3   4    9.13    0.40
  -7  -3   4    8.55    0.37
  -7   3   4    9.24    0.28
   7   3  -4    8.94    0.38
  -6  -3   4  162.78    3.94
  -6  -3   4  160.87    3.95
   6  -3  -4  164.72    3.91
  -6   3   4  144.61    3.91
   6   3  -4  167.66    3.94
   6   3  -4  163.53    3.94
  -5  -3   4   21.83    0.64
  -5  -3   4   21.95    0.62
  -5   3   4   22.48    0.57
   5   3  -4   21.68    0.62
   5   3  -4   21.87    0.63
  -4  -3   4    0.08    0.13
  -4  -3   4    0.18    0.14
   4  -3  -4    0.10    0.09
  -4   3   4   -0.03    0.09
   4   3  -4   -0.11    0.12
   4   3  -4    0.08    0.14
  -3  -3   4   20.64    0.56
   3  -3  -4   19.43    0.53
  -3   3   4   19.69    0.52
   3   3  -4   19.56    0.56
   2  -3  -4   18.21    0.49
  -2  -3   4   17.40    0.50
  -2   3   4   18.05    0.48
   2   3  -4   17.36    0.52
   2   3  -4   17.78    0.51
   1  -3  -4   20.78    0.58
  -1  -3   4   21.05    0.59
  -1  -3   4   21.27    0.58
   1   3  -4   22.17    0.59
   1   3  -4   22.27    0.59
  -1   3   4   21.28    0.57
   0  -3   4    2.98    0.21
   0  -3  -4    2.78    0.23
   0   3  -4    2.99    0.22
   0   3  -4    3.15    0.21
   0   3   4    3.01    0.22
  -1  -3  -4    2.18    0.23
   1  -3   4    2.12    0.19
  -1   3  -4    2.28    0.20
   1   3   4    2.21    0.22
  -1   3  -4    2.35    0.19
  -2  -3  -4    1.12    0.15
   2  -3   4    1.53    0.17
   2   3   4    1.51    0.15
  -2   3  -4    1.46    0.17
  -2   3  -4    1.46    0.17
  -3  -3  -4  263.84    6.89
   3  -3   4  303.49    6.92
  -3   3  -4  290.82    6.90
  -3   3  -4  295.29    6.91
   3   3   4  265.11    6.89
   4  -3   4  139.22    3.41
  -4  -3  -4  140.62    3.45
   4   3   4  142.94    3.45
  -4   3  -4  139.33    3.41
   5  -3   4    3.88    0.17
  -5  -3  -4    4.00    0.28
  -5   3  -4    4.20    0.17
   5   3   4    4.19    0.28
  -6  -3  -4    4.64    0.32
   6  -3   4    4.26    0.18
  -6   3  -4    4.71    0.18
   6   3   4    4.19    0.29
  -7  -3  -4   18.58    0.59
   7  -3   4   18.91    0.50
  -7   3  -4   18.90    0.49
   8  -3   4   13.12    0.38
   8   3   4   13.61    0.48
  -8   3  -4   13.73    0.37
   9  -3   4   15.31    0.41
  -9  -3  -4   14.50    0.53
   9   3   4   14.39    0.52
  10  -3   4    1.08    0.10
  10  -3   4    1.14    0.11
 -10  -3  -4    0.82    0.21
  10   3   4    1.17    0.20
  10   3   4    1.06    0.20
  11  -3   4    0.26    0.09
 -11  -3  -4    0.15    0.21
  11   3   4    0.19    0.20
  11   3   4    0.03    0.20
 -12  -3  -4    2.08    0.24
  12  -3   4    1.78    0.12
  12   3   4    1.94    0.23
  12   3   4    1.79    0.23
 -13  -3  -4    7.37    0.46
  13   3   4    7.21    0.45
 -13  -4   4    0.35    0.27
  13   4  -4   -0.21    0.26
 -12  -4   4    3.94    0.31
  12   4  -4    4.58    0.41
  12   4  -4    3.89    0.41
 -11  -4   4    4.42    0.41
  11   4  -4    4.09    0.37
  11   4  -4    4.77    0.40
 -10  -4   4    1.45    0.23
  10   4  -4    0.82    0.22
  10   4  -4    0.98    0.20
   9  -4  -4    1.56    0.14
   9  -4  -4    1.52    0.10
  -9  -4   4    1.27    0.21
   9   4  -4    1.40    0.21
   9   4  -4    1.22    0.21
   8  -4  -4    0.76    0.10
  -8  -4   4    0.57    0.21
   8  -4  -4    0.58    0.09
   8   4  -4    0.50    0.19
   8   4  -4    0.53    0.20
  -7  -4   4    3.17    0.34
   7  -4  -4    2.75    0.17
   7  -4  -4    3.20    0.18
   7   4  -4    3.36    0.32
   7   4  -4    3.18    0.32
  -6  -4   4    3.78    0.32
   6  -4  -4    3.25    0.17
  -6  -4   4    3.31    0.29
   6   4  -4    3.42    0.31
  -6   4   4    3.54    0.16
   6   4  -4    3.47    0.30
  -5  -4   4    0.62    0.15
  -5  -4   4    0.51    0.16
  -5   4   4    0.57    0.14
   5   4  -4    0.61    0.15
   5   4  -4    0.72    0.17
  -4  -4   4    8.14    0.33
   4  -4  -4    7.65    0.26
  -4  -4   4    8.00    0.35
   4   4  -4    7.77    0.34
   4   4  -4    8.21    0.35
  -4   4   4    8.09    0.26
   3  -4  -4    9.30    0.30
  -3  -4   4    9.43    0.35
  -3  -4   4    9.14    0.36
  -3   4   4    9.20    0.30
   3   4  -4    9.25    0.36
   3   4  -4   10.02    0.36
   2  -4  -4   12.28    0.39
  -2  -4   4   12.34    0.43
  -2  -4   4   12.91    0.41
  -2   4   4   13.12    0.38
   2   4  -4   13.37    0.42
   2   4  -4   12.83    0.41
  -1  -4   4   12.67    0.41
  -1  -4   4   12.51    0.39
   1  -4  -4   12.38    0.39
   1   4  -4   12.54    0.40
   1   4  -4   12.74    0.41
  -1   4   4   12.33    0.38
   0  -4   4    8.17    0.31
   0  -4  -4    7.43    0.31
   0  -4   4    7.71    0.29
   0   4  -4    8.06    0.29
   0   4   4    7.16    0.30
   0   4  -4    8.25    0.31
  -1  -4  -4    0.30    0.14
   1  -4   4    0.04    0.11
  -1   4  -4    0.04    0.11
   1   4   4    0.12    0.14
  -1   4  -4    0.11    0.12
  -2  -4  -4   49.71    1.25
   2  -4   4   49.69    1.21
  -2   4  -4   47.92    1.21
  -2   4  -4   48.09    1.22
   2   4   4   48.08    1.24
  -3  -4  -4   49.06    1.25
   3  -4   4   48.59    1.21
   3   4   4   49.57    1.25
  -3   4  -4   48.47    1.21
  -3   4  -4   47.98    1.21
  -4  -4  -4   27.85    0.78
   4  -4   4   28.60    0.72
   4   4   4   27.65    0.77
  -4   4  -4   28.56    0.71
  -4   4  -4   28.10    0.72
  -5  -4  -4    0.20    0.15
   5  -4   4    0.37    0.08
   5   4   4    0.34    0.16
  -5   4  -4    0.41    0.08
  -5   4  -4    0.42    0.08
  -6  -4  -4   10.36    0.43
   6  -4   4    9.84    0.29
   6   4   4   10.06    0.41
   7  -4   4   24.78    0.63
  -7  -4  -4   25.21    0.74
   7   4   4   25.36    0.74
  -8  -4  -4    1.32    0.22
   8   4   4    1.29    0.20
  -9  -4  -4   15.89    0.57
   9   4   4   15.92    0.55
 -10  -4  -4    2.42    0.25
  10   4   4    2.34    0.23
  10   4   4    2.25    0.24
 -11  -4  -4    0.30    0.22
  11   4   4    0.16    0.20
  11   4   4    0.32    0.22
 -12  -4  -4    1.13    0.24
  12   4   4    0.97    0.24
 -12  -5   4    1.94    0.30
  12   5  -4    2.70    0.30
 -11  -5   4    0.94    0.25
  11   5  -4    0.33    0.30
  11   5  -4    0.17    0.20
 -10  -5   4    7.87    0.47
  10   5  -4    8.41    0.42
  10   5  -4    7.18    0.45
  -9  -5   4    0.81    0.23
   9   5  -4    0.12    0.20
   9   5  -4    0.71    0.20
  -8  -5   4    4.15    0.38
   8   5  -4    3.96    0.37
   8   5  -4    4.25    0.36
   7  -5  -4    0.24    0.08
   7  -5  -4    0.16    0.09
  -7  -5   4    0.01    0.23
   7   5  -4    0.29    0.19
   7   5  -4    0.13    0.19
  -6  -5   4    3.75    0.36
  -6  -5   4    3.71    0.32
   6  -5  -4    4.43    0.18
  -6   5   4    3.96    0.16
   6   5  -4    3.50    0.36
   6   5  -4    4.01    0.34
  -5  -5   4    1.38    0.19
  -5  -5   4    1.35    0.18
  -5   5   4    1.37    0.15
   5   5  -4    1.59    0.19
   5   5  -4    1.38    0.20
  -4  -5   4    0.61    0.18
  -4  -5   4    0.76    0.15
   4  -5  -4    0.95    0.11
  -4   5   4    0.83    0.10
   4   5  -4    0.76    0.17
   4   5  -4    0.88    0.17
  -3  -5   4    1.93    0.18
   3  -5  -4    2.21    0.20
  -3  -5   4    1.69    0.16
   3   5  -4    2.07    0.18
  -3   5   4    2.31    0.18
   3   5  -4    2.23    0.19
   2  -5  -4   67.16    1.66
  -2  -5   4   67.29    1.68
  -2  -5   4   66.53    1.69
   2   5  -4   69.03    1.69
   2   5  -4   65.49    1.68
  -2   5   4   66.31    1.66
  -1  -5   4   16.77    0.50
  -1  -5   4   16.81    0.52
   1  -5  -4   17.28    0.50
  -1   5   4   17.29    0.49
   1   5  -4   16.84    0.51
   1   5  -4   17.02    0.50
   0  -5   4    1.64    0.16
   0  -5  -4    1.69    0.16
   0  -5   4    1.89    0.21
   0   5   4    1.94    0.16
   0   5  -4    2.19    0.22
   0   5  -4    1.92    0.15
   1  -5   4    8.42    0.32
   1  -5   4    9.23    0.31
  -1  -5  -4    8.56    0.35
   1   5   4    8.88    0.35
  -1   5  -4    8.96    0.31
  -1   5  -4    8.67    0.32
  -2  -5  -4   35.52    0.95
   2  -5   4   37.02    0.91
   2   5   4   35.18    0.94
  -2   5  -4   35.07    0.91
  -2   5  -4   35.50    0.91
   3  -5   4    1.23    0.11
  -3  -5  -4    0.93    0.16
  -3   5  -4    1.10    0.11
   3   5   4    0.92    0.16
  -3   5  -4    1.18    0.12
  -4  -5  -4    0.74    0.18
  -4   5  -4    0.62    0.10
  -4   5  -4    0.35    0.09
   4   5   4    0.63    0.16
   5  -5   4    0.43    0.09
  -5  -5  -4    0.18    0.19
  -5   5  -4    0.23    0.08
  -5   5  -4    0.33    0.09
   5   5   4    0.44    0.17
   6  -5   4    4.76    0.18
   6   5   4    4.84    0.35
  -7  -5  -4    4.07    0.38
   7   5   4    4.32    0.36
  -8  -5  -4    4.50    0.39
   8   5   4    4.85    0.37
  -9  -5  -4   30.24    0.92
   9   5   4   32.08    0.91
   9   5   4   31.62    0.90
 -10  -5  -4    0.01    0.23
  10   5   4    0.28    0.20
  10   5   4   -0.25    0.22
 -11  -5  -4    0.35    0.24
  11   5   4   -0.22    0.42
  11   5   4   -0.47    0.19
 -12  -5  -4    0.32    0.25
  12   5   4    0.44    0.25
  12   6  -4    1.33    0.29
 -11  -6   4    1.12    0.27
  11   6  -4    1.13    0.27
 -10  -6   4    1.10    0.26
  10   6  -4    1.12    0.26
  10   6  -4    1.02    0.23
  -9  -6   4    2.56    0.27
   9   6  -4    2.73    0.27
   9   6  -4    3.66    0.37
  -8  -6   4    3.63    0.39
   8   6  -4    2.77    0.42
   8   6  -4    3.91    0.36
  -7  -6   4    4.77    0.40
   7  -6  -4    5.13    0.19
   7   6  -4    6.22    0.40
   7   6  -4    5.12    0.38
  -6  -6   4    0.05    0.20
   6  -6  -4    0.12    0.09
  -6   6   4    0.11    0.07
   6   6  -4    0.22    0.19
   6   6  -4    0.14    0.20
  -5  -6   4   43.77    1.18
  -5  -6   4   44.69    1.17
   5   6  -4   44.26    1.17
  -5   6   4   43.66    1.09
   5   6  -4   43.01    1.18
  -4  -6   4    4.47    0.33
  -4  -6   4    4.17    0.35
   4  -6  -4    4.17    0.23
   4   6  -4    4.47    0.34
   4   6  -4    4.25    0.33
  -4   6   4    4.51    0.22
  -3  -6   4    4.08    0.30
  -3  -6   4    4.49    0.33
   3  -6  -4    4.25    0.24
   3   6  -4    4.15    0.31
  -3   6   4    4.35    0.23
   3   6  -4    4.29    0.30
  -2  -6   4    6.29    0.35
   2  -6  -4    6.95    0.30
  -2  -6   4    6.67    0.33
  -2   6   4    6.59    0.28
   2   6  -4    6.69    0.33
   2   6  -4    7.05    0.33
   1  -6  -4    0.84    0.15
  -1  -6   4    1.21    0.15
  -1  -6   4    0.88    0.17
   1   6  -4    0.92    0.15
   1   6  -4    0.84    0.15
  -1   6   4    0.89    0.14
   0  -6   4    1.37    0.14
   0  -6   4    1.73    0.17
   0  -6  -4    1.52    0.16
   0   6   4    1.45    0.16
   0   6  -4    1.20    0.15
   0   6  -4    1.46    0.16
  -1  -6  -4   11.20    0.42
   1  -6   4   11.84    0.38
   1  -6   4   11.30    0.40
   1   6   4   11.21    0.41
  -1   6  -4   12.05    0.39
  -1   6  -4   11.83    0.38
   2  -6   4    5.82    0.26
   2  -6   4    5.72    0.27
  -2  -6  -4    5.66    0.33
  -2   6  -4    5.72    0.26
   2   6   4    6.03    0.32
  -2   6  -4    5.36    0.26
  -3  -6  -4   13.04    0.48
   3  -6   4   13.06    0.39
   3   6   4   12.96    0.47
  -3   6  -4   12.70    0.39
  -3   6  -4   13.01    0.39
   4  -6   4    2.40    0.19
  -4  -6  -4    2.39    0.22
  -4   6  -4    2.60    0.20
  -4   6  -4    2.67    0.18
   4   6   4    2.62    0.22
  -5  -6  -4   33.33    0.94
   5  -6   4   33.95    0.85
  -5   6  -4   33.47    0.84
  -5   6  -4   33.10    0.84
   6  -6   4    9.84    0.28
   6   6   4    9.90    0.46
  -7  -6  -4    1.09    0.21
   7   6   4    1.32    0.23
  -8  -6  -4    4.56    0.40
   8   6   4    2.94    0.40
   8   6   4    3.78    0.38
  -9  -6  -4    6.70    0.47
   9   6   4    6.40    0.40
   9   6   4    6.14    0.45
 -10  -6  -4    2.74    0.29
  10   6   4    3.65    0.39
  10   6   4    3.10    0.30
 -11  -6  -4    0.92    0.27
  11   6   4    1.20    0.27
  12   6   4    0.52    0.28
 -11  -7   4    3.64    0.35
  11   7  -4    4.04    0.34
 -10  -7   4    5.43    0.48
  10   7  -4    5.77    0.44
  10   7  -4    5.57    0.48
  -9  -7   4    0.13    0.24
   9   7  -4   -0.31    0.25
   9   7  -4    0.29    0.21
  -8  -7   4   14.57    0.59
   8   7  -4   14.84    0.59
   8   7  -4   14.50    0.57
  -7  -7   4    6.88    0.45
   7  -7  -4    6.98    0.23
   7   7  -4    7.20    0.43
   7   7  -4    7.38    0.42
   6  -7  -4   35.77    0.91
  -6  -7   4   36.54    1.04
   6   7  -4   35.93    1.01
   6   7  -4   36.54    1.03
  -6   7   4   35.84    0.90
  -6   7   4   36.34    0.90
  -5  -7   4   43.68    1.22
  -5   7   4   44.95    1.13
   5   7  -4   46.51    1.23
   4  -7  -4    0.08    0.12
  -4  -7   4   -0.21    0.21
   4   7  -4    0.07    0.18
  -4   7   4    0.21    0.11
   4   7  -4   -0.05    0.17
   3  -7  -4    0.45    0.13
  -3  -7   4    0.11    0.18
  -3  -7   4    0.05    0.19
   3   7  -4   -0.03    0.17
  -3   7   4   -0.02    0.12
   3   7  -4    0.26    0.18
  -2  -7   4    9.08    0.58
   2  -7  -4   10.52    0.38
  -2  -7   4   10.66    0.44
   2   7  -4    9.83    0.42
   2   7  -4   10.95    0.41
  -2   7   4   10.66    0.37
  -1  -7   4   14.54    0.50
   1  -7  -4   14.70    0.48
  -1  -7   4   14.18    0.48
   1   7  -4   14.78    0.49
   1   7  -4   14.36    0.48
  -1   7   4   14.30    0.46
   0  -7  -4   14.67    0.49
   0  -7   4   14.59    0.49
   0  -7   4   14.22    0.47
   0   7  -4   15.09    0.48
   0   7   4   14.69    0.48
   0   7  -4   14.73    0.48
   1  -7   4   12.84    0.44
   1  -7   4   12.70    0.42
  -1  -7  -4   12.58    0.47
   1   7   4   12.97    0.46
  -1   7  -4   12.49    0.43
  -1   7  -4   12.95    0.43
  -2  -7  -4   19.14    0.62
   2  -7   4   19.08    0.56
   2  -7   4   19.08    0.56
   2   7   4   20.30    0.61
  -2   7  -4   19.82    0.56
  -2   7  -4   19.12    0.56
   3  -7   4   11.46    0.37
  -3  -7  -4   11.71    0.47
  -3   7  -4   11.61    0.38
  -3   7  -4   11.24    0.37
   3   7   4   11.78    0.47
   4  -7   4   89.56    2.24
  -4  -7  -4   90.96    2.30
  -4   7  -4   91.05    2.23
   4   7   4   92.45    2.30
  -4   7  -4   91.18    2.24
  -5  -7  -4   41.80    1.13
  -5   7  -4   40.88    1.02
   5   7   4   40.08    1.12
  -5   7  -4   40.79    1.02
  -6  -7  -4    8.20    0.46
   6   7   4    8.21    0.45
  -7  -7  -4    1.97    0.26
   7   7   4    1.84    0.24
   7   7   4    1.70    0.25
  -8  -7  -4    0.36    0.23
   8   7   4   -0.02    0.21
   8   7   4    0.26    0.22
  -9  -7  -4    1.31    0.27
   9   7   4    1.36    0.27
   9   7   4    1.19    0.23
 -10  -7  -4    0.58    0.25
  10   7   4   -0.03    0.29
  10   7   4   -0.11    0.28
 -11  -7  -4    1.87    0.30
  11   7   4    2.07    0.30
 -10  -8   4    0.11    0.29
  10   8  -4    0.19    0.26
  -9  -8   4    0.57    0.28
   9   8  -4    0.34    0.22
   9   8  -4    0.33    0.25
  -8  -8   4    9.53    0.54
   8   8  -4    9.75    0.50
   8   8  -4   10.75    0.53
  -7  -8   4    9.73    0.52
   7  -8  -4    9.51    0.29
   7   8  -4    9.70    0.49
   7   8  -4    9.40    0.48
  -6  -8   4    3.26    0.29
   6  -8  -4    3.32    0.20
   6   8  -4    3.17    0.27
  -6   8   4    3.27    0.16
  -6   8   4    3.51    0.17
   6   8  -4    3.11    0.27
  -5  -8   4    8.72    0.48
   5   8  -4   10.03    0.46
   5   8  -4    8.59    0.44
  -5   8   4    8.36    0.29
  -5   8   4    8.24    0.30
   4  -8  -4    1.66    0.15
  -4  -8   4    1.61    0.25
  -4   8   4    1.64    0.14
   4   8  -4    1.82    0.25
  -4   8   4    1.46    0.14
   4   8  -4    1.54    0.22
  -3  -8   4   -0.01    0.21
   3  -8  -4   -0.13    0.14
   3   8  -4    0.20    0.19
   3   8  -4    0.28    0.20
  -3   8   4    0.11    0.13
   2  -8  -4    5.73    0.31
  -2  -8   4    5.77    0.39
   2   8  -4    5.09    0.37
   2   8  -4    6.01    0.35
  -2   8   4    4.76    0.29
   1  -8  -4    0.22    0.16
  -1  -8   4    0.40    0.19
   1   8  -4    0.13    0.17
  -1   8   4    0.15    0.16
   0  -8   4    0.25    0.18
   0  -8  -4    0.22    0.18
   0   8   4    0.45    0.17
   0   8  -4    0.20    0.17
   0   8  -4   -0.02    0.16
  -1  -8  -4    3.93    0.34
   1  -8   4    4.33    0.32
  -1   8  -4    3.85    0.30
   1   8   4    3.71    0.34
  -1   8  -4    4.20    0.30
   2  -8   4    8.58    0.36
  -2  -8  -4    8.65    0.43
  -2   8  -4    8.26    0.34
  -2   8  -4    8.45    0.35
   2   8   4    9.00    0.41
  -3  -8  -4   36.23    1.02
   3   8   4   35.92    1.01
  -3   8  -4   36.93    0.95
  -3   8  -4   36.22    0.94
  -4  -8  -4   12.83    0.55
  -4   8  -4   12.86    0.40
  -4   8  -4   12.87    0.41
   4   8   4   13.47    0.52
  -5   8  -4    5.65    0.24
  -5   8  -4    5.48    0.23
   5   8   4    6.15    0.40
  -6  -8  -4    2.92    0.29
   6   8   4    2.15    0.26
   6   8   4    1.92    0.25
  -7  -8  -4    5.64    0.47
   7   8   4    5.88    0.45
   7   8   4    6.24    0.43
  -8  -8  -4    1.15    0.27
   8   8   4    1.27    0.28
   8   8   4    0.48    0.22
  -9  -8  -4    1.59    0.29
   9   8   4    1.30    0.25
   9   8   4    1.79    0.29
 -10  -8  -4    0.51    0.27
  10   8   4    0.15    0.29
  -9  -9   4    0.30    0.29
   9   9  -4    0.70    0.27
  -8  -9   4    0.73    0.27
   8   9  -4    0.88    0.27
   8   9  -4    0.53    0.24
   7  -9  -4    0.59    0.10
  -7  -9   4    0.23    0.26
   7   9  -4    0.78    0.25
   7   9  -4    1.06    0.24
  -6  -9   4    0.25    0.25
   6  -9  -4    0.05    0.11
  -6   9   4    0.16    0.09
  -6   9   4    0.04    0.09
   6   9  -4    0.13    0.24
   6   9  -4    0.13    0.22
  -5  -9   4   13.82    0.61
   5  -9  -4   12.98    0.49
  -5   9   4   14.07    0.42
   5   9  -4   14.92    0.59
  -5   9   4   13.35    0.41
   5   9  -4   14.59    0.56
  -4  -9   4   12.54    0.67
   4  -9  -4   14.68    0.45
   4   9  -4   14.02    0.54
  -4   9   4   14.28    0.44
   4   9  -4   14.57    0.59
   3  -9  -4    0.24    0.16
  -3  -9   4    0.38    0.23
   3   9  -4    0.42    0.28
  -3   9   4    0.21    0.14
  -3   9   4    0.23    0.13
   3   9  -4    0.26    0.19
  -2  -9   4    0.26    0.21
   2  -9  -4    0.10    0.16
   2   9  -4    0.26    0.18
  -2   9   4    0.37    0.15
   2   9  -4    0.42    0.20
  -2   9   4    0.42    0.15
   1  -9  -4   11.69    0.45
  -1  -9   4   12.27    0.48
  -1   9   4   11.20    0.44
   1   9  -4   11.37    0.46
  -1   9   4   12.10    0.44
   1   9  -4   11.47    0.47
   0  -9  -4    5.91    0.37
   0  -9   4    6.18    0.38
   0   9  -4    6.84    0.36
   0   9  -4    6.41    0.37
   0   9   4    6.57    0.36
  -1  -9  -4    0.85    0.21
   1  -9   4    0.74    0.18
  -1   9  -4    0.56    0.18
   1   9   4    1.11    0.20
  -1   9  -4    0.68    0.17
  -2  -9  -4   -0.26    0.20
   2  -9   4    0.08    0.16
   2   9   4    0.26    0.18
  -2   9  -4    0.13    0.16
   2   9   4    0.30    0.20
  -2   9  -4    0.13    0.16
   3  -9   4    5.96    0.30
  -3  -9  -4    6.19    0.43
  -3   9  -4    5.82    0.29
   3   9   4    5.80    0.50
   3   9   4    6.06    0.39
  -3   9  -4    4.86    0.35
  -4  -9  -4   13.89    0.58
  -4   9  -4   14.29    0.44
   4   9   4   14.31    0.55
   4   9   4   14.10    0.58
  -4   9  -4   13.99    0.44
  -5  -9  -4   18.32    0.69
  -5   9  -4   18.49    0.51
   5   9   4   19.09    0.67
  -5   9  -4   18.31    0.51
   5   9   4   19.22    0.66
  -6  -9  -4    3.80    0.33
   6   9   4    3.93    0.41
   6   9   4    3.93    0.31
  -7  -9  -4    1.94    0.30
   7   9   4    1.53    0.24
   7   9   4    1.69    0.28
  -8  -9  -4    2.95    0.32
   8   9   4    2.71    0.31
   8   9   4    2.03    0.27
  -9  -9  -4    0.00    0.29
   9   9   4    0.39    0.29
  -8 -10   4    0.02    0.29
   8  10  -4   -0.04    0.26
  -7 -10   4   -0.23    0.28
   7 -10  -4    0.06    0.10
   7  10  -4   -0.20    0.24
   7  10  -4   -0.09    0.24
  -6 -10   4    2.40    0.31
   6 -10  -4    2.44    0.23
  -6  10   4    2.39    0.18
   6  10  -4    2.04    0.28
   6  10  -4    2.29    0.27
  -6  10   4    2.39    0.17
   5 -10  -4    0.87    0.15
  -5 -10   4    1.32    0.28
  -5  10   4    0.99    0.14
   5  10  -4    0.99    0.25
  -5  10   4    1.26    0.14
   5  10  -4    1.00    0.24
  -4 -10   4    5.49    0.48
   4 -10  -4    4.59    0.28
  -4  10   4    4.27    0.26
  -4  10   4    4.89    0.28
   4  10  -4    4.50    0.40
   4  10  -4    4.33    0.44
  -3 -10   4    0.40    0.43
   3 -10  -4    0.32    0.16
  -3  10   4    0.44    0.16
   3  10  -4    0.05    0.19
   3  10  -4    0.09    0.22
  -3  10   4    0.00    0.14
  -2 -10   4    3.84    0.41
   2 -10  -4    3.84    0.32
  -2  10   4    3.50    0.30
   2  10  -4    3.41    0.28
   2  10  -4    3.23    0.36
  -2  10   4    3.86    0.30
  -1 -10   4   13.78    0.55
   1 -10  -4   12.87    0.51
  -1  10   4   13.00    0.48
  -1  10   4   13.24    0.48
   1  10  -4   13.77    0.52
   1  10  -4   13.55    0.51
   0 -10  -4    7.28    0.42
   0 -10   4    7.55    0.42
   0  10   4    6.87    0.38
   0  10  -4    7.27    0.39
   0  10   4    6.92    0.39
   0  10  -4    7.20    0.38
  -1 -10  -4    2.90    0.26
   1 -10   4    3.14    0.34
   1  10   4    3.46    0.35
  -1  10  -4    3.57    0.32
  -1  10  -4    3.55    0.32
   1  10   4    3.47    0.26
   2 -10   4    1.63    0.19
  -2 -10  -4    1.95    0.26
  -2  10  -4    1.61    0.20
  -2  10  -4    1.94    0.19
   2  10   4    2.12    0.24
   2  10   4    1.47    0.26
   3 -10   4    0.18    0.15
  -3 -10  -4    0.38    0.25
   3  10   4   -0.08    0.20
  -3  10  -4    0.10    0.15
   3  10   4    0.42    0.23
  -3  10  -4    0.30    0.14
  -4 -10  -4   -0.20    0.24
   4  10   4    0.34    0.22
  -4  10  -4    0.11    0.15
   4  10   4    0.14    0.24
  -4  10  -4   -0.02    0.14
  -5 -10  -4   -0.09    0.27
   5  10   4   -0.39    0.24
  -5  10  -4    0.17    0.12
  -5  10  -4    0.11    0.16
   5  10   4   -0.36    0.24
  -6 -10  -4    8.86    0.58
   6  10   4    8.26    0.52
   6  10   4    9.11    0.50
  -7 -10  -4   -0.37    0.29
   7  10   4   -0.41    0.24
   7  10   4   -0.18    0.28
  -8 -10  -4    9.09    0.61
   8  10   4   10.81    0.58
  -7 -11   4   -0.03    0.31
   7  11  -4   -0.06    0.31
   7  11  -4   -1.04    0.34
  -6 -11   4    0.83    0.30
  -6  11   4    0.46    0.11
   6  11  -4   -0.19    0.25
   6  11  -4    0.47    0.25
  -6  11   4    0.67    0.10
  -5 -11   4    1.63    0.33
   5 -11  -4    1.49    0.16
   5  11  -4    2.02    0.27
  -5  11   4    1.96    0.21
   5  11  -4    1.33    0.26
  -5  11   4    1.81    0.16
   4 -11  -4    1.07    0.17
  -4 -11   4    1.34    0.30
   4  11  -4    1.02    0.24
   4  11  -4    0.80    0.23
  -4  11   4    0.85    0.17
  -4  11   4    0.92    0.17
  -3 -11   4    1.79    0.30
   3 -11  -4    1.52    0.19
  -3  11   4    1.76    0.19
   3  11  -4    1.35    0.24
   3  11  -4    1.55    0.27
  -3  11   4    1.61    0.19
   2 -11  -4    0.55    0.19
  -2 -11   4    0.74    0.28
   2  11  -4    0.22    0.21
  -2  11   4    0.69    0.18
  -2  11   4    0.76    0.17
   2  11  -4    0.57    0.24
  -1 -11   4    1.12    0.25
   1 -11  -4    1.27    0.22
   1  11  -4    1.32    0.23
  -1  11   4    1.12    0.20
   1  11  -4    1.75    0.24
  -1  11   4    1.53    0.21
   0 -11  -4    1.01    0.23
   0 -11   4    0.61    0.23
   0  11  -4    0.69    0.20
   0  11   4    0.51    0.21
   0  11  -4    0.80    0.21
   0  11   4    0.81    0.21
  -1 -11  -4    1.80    0.27
   1 -11   4    1.87    0.23
  -1  11  -4    2.22    0.22
   1  11   4    2.06    0.24
   1  11   4    2.58    0.24
  -1  11  -4    1.96    0.22
  -2 -11  -4    0.48    0.42
   2 -11   4    0.25    0.18
   2  11   4    0.47    0.23
  -2  11  -4    0.07    0.16
   2  11   4   -0.13    0.22
  -2  11  -4    0.17    0.18
  -3 -11  -4    1.36    0.28
   3 -11   4    1.95    0.19
  -3  11  -4    1.94    0.19
   3  11   4    1.77    0.25
  -3  11  -4    1.88    0.19
   3  11   4    1.50    0.25
  -4 -11  -4    0.37    0.29
   4  11   4   -0.03    0.24
  -4  11  -4    0.33    0.15
  -4  11  -4    0.08    0.17
   4  11   4    0.09    0.23
  -5 -11  -4    4.48    0.37
   5  11   4    3.64    0.32
  -5  11  -4    3.70    0.22
  -5  11  -4    4.12    0.24
   5  11   4    5.10    0.47
  -6 -11  -4    0.43    0.31
   6  11   4    0.22    0.28
   6  11   4    0.57    0.25
  -7 -11  -4   -0.09    0.30
   7  11   4    0.12    0.29
  -5 -12   4    0.21    0.30
  -5  12   4    0.11    0.14
   5  12  -4    0.31    0.22
  -4 -12   4    1.20    0.31
   4  12  -4    0.53    0.28
  -4  12   4    0.66    0.17
   4  12  -4    0.41    0.24
   3 -12  -4    0.55    0.18
  -3 -12   4   -0.01    0.28
  -3  12   4   -0.12    0.18
   3  12  -4    0.08    0.22
  -3  12   4    0.07    0.24
   3  12  -4    0.68    0.23
  -2 -12   4    5.07    0.51
   2 -12  -4    4.67    0.38
  -2  12   4    5.03    0.35
   2  12  -4    4.77    0.43
  -2  12   4    4.33    0.40
   2  12  -4    5.05    0.42
  -1 -12   4    0.96    0.27
   1 -12  -4    1.01    0.24
  -1  12   4    1.13    0.21
   1  12  -4    0.66    0.23
  -1  12   4    0.85    0.23
   0 -12   4    0.05    0.23
   0 -12  -4    0.42    0.25
   0  12   4    0.57    0.21
   0  12  -4    0.04    0.22
   0  12  -4    0.37    0.21
   0  12   4    0.58    0.21
   1 -12   4    0.01    0.21
  -1 -12  -4    0.33    0.42
   1  12   4    0.17    0.22
   1  12   4    0.07    0.21
  -1  12  -4   -0.05    0.21
  -1  12  -4   -0.10    0.19
   2 -12   4    0.09    0.20
  -2 -12  -4    0.65    0.28
   2  12   4    0.10    0.23
   2  12   4    0.19    0.22
  -2  12  -4    0.26    0.19
  -2  12  -4   -0.09    0.23
  -3 -12  -4    1.35    0.31
  -3  12  -4    1.37    0.20
  -3  12  -4    1.46    0.28
   3  12   4    1.35    0.25
   3  12   4    1.38    0.26
  -4 -12  -4    1.12    0.32
   4  12   4    0.45    0.25
  -4  12  -4    1.13    0.17
   4  12   4    0.82    0.29
  13   0  -5    0.03    0.17
  13   0  -5   -0.38    0.14
  12   0  -5   -0.25    0.14
  12   0  -5    0.26    0.15
  11   0  -5    0.15    0.15
  11   0  -5   -0.17    0.17
  10   0  -5   -0.27    0.16
  10   0  -5    0.07    0.14
   9   0  -5   -0.27    0.14
  -9   0   5    0.15    0.13
   9   0  -5    0.06    0.15
  -8   0   5   -0.07    0.13
   8   0  -5   -0.01    0.16
   8   0  -5   -0.01    0.14
  -7   0   5   -0.06    0.12
   7   0  -5   -0.04    0.14
   7   0  -5   -0.11    0.13
   6   0  -5    0.16    0.13
   6   0  -5   -0.01    0.12
  -6   0   5   -0.14    0.11
  -5   0   5   -0.06    0.11
   5   0  -5   -0.11    0.11
   5   0  -5    0.08    0.12
   4   0  -5    0.03    0.12
  -4   0   5   -0.09    0.11
   4   0  -5    0.05    0.12
   3   0  -5   -0.10    0.11
  -3   0   5   -0.13    0.11
   2   0  -5   -0.14    0.12
  -2   0   5   -0.03    0.11
  -1   0   5    0.03    0.11
   1   0  -5   -0.08    0.11
   0   0   5   -0.12    0.12
   0   0  -5    0.03    0.12
   1   0   5    0.00    0.12
  -1   0  -5   -0.01    0.12
   2   0   5   -0.05    0.11
  -2   0  -5   -0.07    0.11
  -3   0  -5   -0.01    0.12
   3   0   5   -0.10    0.11
   4   0   5    0.10    0.11
  -4   0  -5    0.03    0.12
   5   0   5    0.11    0.12
  -5   0  -5   -0.03    0.12
  -6   0  -5   -0.16    0.13
   6   0   5    0.03    0.12
  -7   0  -5   -0.06    0.14
   7   0   5   -0.09    0.13
  -8   0  -5   -0.13    0.15
   8   0   5    0.10    0.15
  -9   0  -5   -0.01    0.16
   9   0   5   -0.09    0.15
 -10   0  -5    0.13    0.16
  10   0   5   -0.09    0.15
 -11   0  -5    0.04    0.17
  11   0   5    0.01    0.16
  11   0   5   -0.05    0.14
 -12   0  -5    0.23    0.18
  12   0   5   -0.16    0.15
  12   0   5   -0.07    0.14
 -13   0  -5   -0.20    0.18
  13   0   5    0.26    0.15
  13  -1  -5    2.39    0.20
  13   1  -5    2.27    0.22
  13   1  -5    1.67    0.23
  12  -1  -5    9.18    0.35
  12  -1  -5    8.94    0.38
  12   1  -5   10.50    0.41
  12   1  -5    9.44    0.43
  11  -1  -5   20.31    0.58
  11  -1  -5   19.13    0.56
  11   1  -5   19.06    0.59
  11   1  -5   18.35    0.61
  10  -1  -5    0.44    0.14
  10  -1  -5    0.33    0.15
  10   1  -5    0.44    0.17
  10   1  -5    0.09    0.16
   9  -1  -5    7.49    0.34
   9  -1  -5    7.80    0.32
  -9  -1   5    8.08    0.35
   9   1  -5    8.04    0.36
  -9   1   5    7.62    0.30
   9   1  -5    7.94    0.37
   8  -1  -5    1.73    0.16
  -8  -1   5    1.76    0.17
   8  -1  -5    2.03    0.17
   8   1  -5    2.03    0.19
   8   1  -5    1.88    0.18
  -8   1   5    1.87    0.15
  -7  -1   5    3.23    0.26
   7  -1  -5    3.67    0.24
   7  -1  -5    3.64    0.25
   7   1  -5    4.11    0.28
   7   1  -5    3.46    0.27
  -7   1   5    3.55    0.22
   6  -1  -5    9.52    0.32
   6  -1  -5    9.14    0.33
  -6  -1   5    9.38    0.34
   6   1  -5    9.71    0.36
  -6   1   5    9.42    0.32
   6   1  -5   10.11    0.35
   5  -1  -5    6.09    0.26
   5  -1  -5    6.19    0.25
  -5  -1   5    6.40    0.27
   5   1  -5    6.33    0.28
   5   1  -5    5.98    0.29
  -5   1   5    5.99    0.25
  -4  -1   5   12.12    0.38
   4  -1  -5   11.98    0.36
  -4   1   5   11.82    0.36
   4   1  -5   11.66    0.38
   4   1  -5   11.45    0.38
   3  -1  -5   -0.04    0.11
  -3  -1   5   -0.12    0.11
   3   1  -5   -0.10    0.12
   3   1  -5   -0.02    0.12
  -3   1   5    0.17    0.10
   2  -1  -5  382.05    9.25
  -2  -1   5  372.73    9.26
  -2   1   5  393.68    9.27
   2   1  -5  364.53    9.23
  -1  -1   5   68.90    1.75
   1  -1  -5   71.33    1.75
   1   1  -5   69.40    1.76
  -1   1   5   74.76    1.76
   0   1  -5    7.74    0.29
   0   1   5    6.89    0.30
   1  -1   5   48.88    1.23
   1   1   5   48.87    1.24
  -1   1  -5   50.42    1.24
   2  -1   5   10.06    0.33
  -2  -1  -5   10.76    0.35
  -2   1  -5   10.77    0.34
   2   1   5   10.83    0.35
  -3  -1  -5   22.21    0.62
   3  -1   5   23.11    0.60
  -3   1  -5   23.09    0.60
   3   1   5   22.04    0.61
   4  -1   5    1.22    0.12
  -4  -1  -5    1.38    0.15
  -4   1  -5    1.34    0.13
   4   1   5    1.20    0.13
  -5  -1  -5    4.04    0.26
   5  -1   5    4.35    0.22
   5   1   5    4.12    0.25
  -5   1  -5    4.26    0.23
  -6  -1  -5   15.82    0.49
   6  -1   5   16.17    0.46
   6   1   5   15.60    0.48
  -6   1  -5   15.63    0.46
   7  -1   5   18.78    0.51
  -7  -1  -5   17.26    0.54
  -7   1  -5   17.41    0.51
   7   1   5   17.52    0.53
  -8  -1  -5   36.40    0.97
   8  -1   5   35.22    0.93
   8   1   5   36.76    0.96
  -8   1  -5   35.60    0.94
   9  -1   5    1.84    0.16
  -9  -1  -5    1.51    0.20
   9   1   5    1.44    0.18
  -9   1  -5    1.67    0.16
  10  -1   5    0.89    0.15
 -10   1  -5    1.05    0.16
  10   1   5    0.98    0.17
 -11  -1  -5    0.45    0.19
  11  -1   5    0.64    0.13
  11  -1   5    0.64    0.14
  11   1   5    0.35    0.17
 -11   1  -5    0.80    0.16
  11   1   5    0.77    0.19
 -12  -1  -5    0.68    0.20
  12  -1   5    0.97    0.14
  12  -1   5    0.72    0.16
  12   1   5    0.35    0.18
 -12   1  -5    0.74    0.17
  12   1   5    0.17    0.17
  13  -1   5   -0.03    0.15
 -13  -1  -5    0.20    0.20
  13   1   5    0.36    0.21
  13   1   5    0.44    0.25
 -13   1  -5    0.40    0.16
  13  -2  -5    1.32    0.15
  13   2  -5    1.28    0.22
  12  -2  -5    0.71    0.15
  12   2  -5    0.30    0.20
  12   2  -5    0.09    0.21
  11  -2  -5    2.61    0.25
  11  -2  -5    2.88    0.26
  11   2  -5    3.23    0.33
  11   2  -5    3.29    0.33
  10  -2  -5   17.14    0.50
  10  -2  -5   17.42    0.51
  10   2  -5   17.39    0.57
  10   2  -5   16.82    0.58
  -9  -2   5    0.61    0.19
   9  -2  -5    0.52    0.23
   9  -2  -5    0.79    0.13
   9   2  -5    0.63    0.18
   9   2  -5    0.59    0.18
  -8  -2   5    5.79    0.36
  -8  -2   5    6.14    0.33
   8  -2  -5    6.24    0.28
   8  -2  -5    6.11    0.26
  -8   2   5    6.20    0.25
   8   2  -5    5.48    0.34
   8   2  -5    5.75    0.34
  -7  -2   5   27.52    0.78
  -7  -2   5   27.16    0.76
   7  -2  -5   27.71    0.73
   7  -2  -5   27.78    0.73
   7   2  -5   27.73    0.78
   7   2  -5   27.85    0.77
  -7   2   5   28.51    0.72
   6  -2  -5   24.77    0.65
  -6  -2   5   24.95    0.68
   6  -2  -5   24.06    0.65
  -6  -2   5   23.96    0.70
  -6   2   5   24.00    0.64
   6   2  -5   24.94    0.69
   6   2  -5   24.53    0.69
  -5  -2   5   16.90    0.50
   5  -2  -5   16.20    0.46
  -5  -2   5   17.22    0.52
   5   2  -5   16.52    0.50
   5   2  -5   16.93    0.51
  -5   2   5   16.89    0.46
  -4  -2   5   11.11    0.38
   4  -2  -5   11.30    0.34
  -4   2   5   11.15    0.34
   4   2  -5   10.97    0.38
   4   2  -5   10.72    0.38
   3  -2  -5   18.14    0.50
  -3  -2   5   18.37    0.52
  -3   2   5   18.02    0.49
   3   2  -5   17.96    0.53
   3   2  -5   18.38    0.52
   2  -2  -5    0.50    0.12
  -2   2   5    0.57    0.11
  -1  -2   5   45.10    1.14
   1  -2  -5   44.30    1.14
  -1   2   5   46.75    1.14
   1   2  -5   44.78    1.14
   1   2  -5   45.27    1.15
   0  -2   5   31.65    0.82
   0  -2  -5   30.87    0.82
   0   2  -5   32.09    0.82
   0   2   5   32.44    0.82
   1  -2   5    2.30    0.20
  -1  -2  -5    1.86    0.15
   1   2   5    2.05    0.22
  -1   2  -5    2.31    0.20
  -2  -2  -5   36.39    0.95
   2  -2   5   37.36    0.93
  -2   2  -5   35.90    0.93
   2   2   5   36.96    0.95
   3  -2   5   90.81    2.23
  -3  -2  -5   93.53    2.26
   3   2   5   91.79    2.25
  -3   2  -5   88.95    2.23
   4  -2   5    6.18    0.24
  -4  -2  -5    5.92    0.30
  -4   2  -5    6.17    0.24
   4   2   5    6.30    0.28
  -5  -2  -5   28.72    0.78
   5  -2   5   28.64    0.74
   5   2   5   28.62    0.77
  -5   2  -5   28.56    0.74
  -6  -2  -5    0.51    0.15
   6  -2   5    0.59    0.11
  -6   2  -5    0.69    0.11
   6   2   5    0.60    0.15
   7  -2   5    1.80    0.19
  -7  -2  -5    1.95    0.20
   7   2   5    1.81    0.21
  -7   2  -5    1.98    0.20
   8  -2   5    0.89    0.13
  -8  -2  -5    0.73    0.18
  -8   2  -5    0.93    0.13
   8   2   5    0.82    0.18
   9  -2   5    0.18    0.13
  -9  -2  -5    0.18    0.18
  -9   2  -5    0.17    0.12
   9   2   5    0.27    0.17
  10  -2   5    0.91    0.13
 -10  -2  -5    0.96    0.21
  10   2   5    1.00    0.19
 -10   2  -5    1.07    0.14
  11  -2   5    2.31    0.23
 -11  -2  -5    2.16    0.23
  11   2   5    2.27    0.20
 -11   2  -5    2.06    0.22
  11   2   5    2.15    0.21
 -12  -2  -5    3.03    0.26
  12  -2   5    3.27    0.25
  12  -2   5    3.29    0.25
  12   2   5    2.68    0.23
  12   2   5    3.18    0.33
 -12   2  -5    2.45    0.20
  13  -2   5    1.20    0.16
 -13  -2  -5    1.30    0.24
  13   2   5    1.62    0.24
  13  -3  -5    1.98    0.16
  13   3  -5    1.84    0.27
  12  -3  -5    1.64    0.13
  12  -3  -5    1.85    0.14
  12   3  -5    1.59    0.23
  12   3  -5    1.51    0.23
 -11  -3   5    4.68    0.40
  11  -3  -5    4.22    0.25
  11  -3  -5    4.34    0.22
  11   3  -5    4.36    0.38
  11   3  -5    4.93    0.36
 -10  -3   5    2.77    0.25
  10  -3  -5    2.59    0.19
  10  -3  -5    2.45    0.22
  10   3  -5    2.57    0.23
  10   3  -5    2.53    0.23
   9  -3  -5   10.78    0.35
  -9  -3   5   10.28    0.46
   9   3  -5   10.04    0.43
   9   3  -5   11.36    0.44
  -8  -3   5    5.57    0.37
  -8  -3   5    5.06    0.34
   8  -3  -5    5.34    0.26
   8   3  -5    6.20    0.35
   8   3  -5    5.21    0.34
  -8   3   5    5.55    0.22
  -7  -3   5    0.87    0.18
   7  -3  -5    0.85    0.13
  -7  -3   5    0.71    0.16
   7   3  -5    0.99    0.18
   7   3  -5    0.63    0.17
  -7   3   5    0.87    0.12
  -6  -3   5    6.34    0.35
   6  -3  -5    6.60    0.25
   6  -3  -5    6.33    0.25
  -6  -3   5    7.01    0.33
   6   3  -5    6.37    0.33
  -6   3   5    6.17    0.24
   6   3  -5    6.39    0.33
   5  -3  -5    0.82    0.11
  -5  -3   5    0.85    0.16
  -5  -3   5    0.55    0.16
   5   3  -5    0.91    0.16
   5   3  -5    0.55    0.15
  -5   3   5    0.76    0.10
   4  -3  -5   35.67    0.92
  -4  -3   5   37.27    0.95
  -4  -3   5   35.18    0.95
   4   3  -5   36.62    0.96
  -4   3   5   35.85    0.91
   4   3  -5   36.12    0.95
  -3  -3   5    5.80    0.30
  -3  -3   5    5.62    0.29
   3  -3  -5    5.68    0.24
   3   3  -5    5.57    0.29
  -3   3   5    5.52    0.23
   3   3  -5    5.60    0.29
  -2  -3   5    0.27    0.15
   2  -3  -5    0.14    0.11
  -2  -3   5    0.29    0.14
  -2   3   5    0.32    0.11
   2   3  -5    0.37    0.14
   2   3  -5    0.08    0.13
  -1  -3   5   24.64    0.67
   1  -3  -5   25.92    0.67
   1   3  -5   24.43    0.68
  -1   3   5   25.35    0.67
   1   3  -5   25.41    0.68
   0  -3   5    0.38    0.12
   0  -3  -5    0.47    0.13
   0   3  -5    0.54    0.13
   0   3  -5    0.40    0.13
   0   3   5    0.32    0.13
   1  -3   5    0.91    0.12
  -1  -3  -5    0.56    0.13
   1   3   5    0.89    0.14
  -1   3  -5    0.90    0.12
  -1   3  -5    0.91    0.12
   2  -3   5    7.41    0.26
  -2  -3  -5    7.24    0.31
   2   3   5    7.07    0.30
  -2   3  -5    6.74    0.26
  -2   3  -5    7.04    0.26
   3  -3   5    5.96    0.24
  -3  -3  -5    6.46    0.31
   3   3   5    6.27    0.31
  -3   3  -5    6.54    0.24
  -4  -3  -5    6.41    0.32
   4  -3   5    6.62    0.24
  -4   3  -5    6.45    0.24
   4   3   5    6.27    0.32
  -5  -3  -5    3.23    0.28
   5  -3   5    3.00    0.17
   5   3   5    2.42    0.27
  -5   3  -5    2.89    0.18
  -6  -3  -5    1.09    0.18
   6  -3   5    1.05    0.11
   6   3   5    1.17    0.17
  -6   3  -5    1.01    0.11
  -7  -3  -5    1.15    0.19
   7  -3   5    1.42    0.12
   7   3   5    1.14    0.18
  -7   3  -5    1.43    0.12
  -8  -3  -5    7.24    0.39
   8  -3   5    7.20    0.26
   8   3   5    7.45    0.38
  -8   3  -5    7.69    0.26
  -9  -3  -5    0.24    0.19
   9  -3   5    0.42    0.10
  -9   3  -5    0.33    0.10
   9   3   5    0.48    0.18
 -10  -3  -5    2.04    0.24
  10   3   5    2.02    0.21
  11  -3   5    2.79    0.20
  11  -3   5    2.66    0.18
 -11  -3  -5    2.58    0.26
  11   3   5    2.49    0.23
  11   3   5    2.22    0.24
  12  -3   5    2.74    0.19
  12  -3   5    2.24    0.19
 -12  -3  -5    2.64    0.26
  12   3   5    2.40    0.26
  12   3   5    2.65    0.25
 -13  -3  -5    6.18    0.46
  13   3   5    7.14    0.46
 -12  -4   5   -0.37    0.23
  12   4  -5   -0.24    0.23
  11  -4  -5    2.93    0.17
  11  -4  -5    3.22    0.22
 -11  -4   5    3.31    0.28
  11   4  -5    2.32    0.24
  11   4  -5    2.92    0.27
 -10  -4   5    5.94    0.42
  10  -4  -5    5.79    0.23
  10  -4  -5    5.37    0.22
  10   4  -5    6.12    0.41
  10   4  -5    5.65    0.37
  -9  -4   5    1.42    0.23
   9  -4  -5    1.43    0.12
   9  -4  -5    1.57    0.15
   9   4  -5    1.20    0.21
   9   4  -5    1.01    0.20
   8  -4  -5    5.32    0.23
   8  -4  -5    4.96    0.22
  -8  -4   5    5.43    0.38
   8   4  -5    4.39    0.35
  -8   4   5    4.92    0.19
   8   4  -5    4.32    0.36
  -7  -4   5    2.59    0.23
   7  -4  -5    3.33    0.20
  -7  -4   5    3.30    0.23
   7   4  -5    3.02    0.32
   7   4  -5    2.60    0.22
  -7   4   5    3.00    0.17
  -6  -4   5   11.33    0.46
  -6  -4   5   11.92    0.44
   6   4  -5   11.57    0.44
   6   4  -5   11.32    0.49
  -5  -4   5   26.38    0.73
  -5  -4   5   25.65    0.74
   5  -4  -5   25.36    0.67
   5   4  -5   25.58    0.73
   5   4  -5   25.60    0.72
  -5   4   5   24.98    0.66
   4  -4  -5    2.13    0.19
  -4  -4   5    2.25    0.20
  -4  -4   5    1.80    0.16
   4   4  -5    2.24    0.20
  -4   4   5    2.33    0.18
   4   4  -5    2.43    0.27
  -3  -4   5    3.68    0.28
  -3  -4   5    3.49    0.29
   3  -4  -5    3.42    0.22
   3   4  -5    3.69    0.28
  -3   4   5    3.50    0.21
   3   4  -5    3.70    0.28
  -2  -4   5    1.00    0.15
  -2  -4   5    1.17    0.14
   2  -4  -5    1.19    0.13
   2   4  -5    1.21    0.15
  -2   4   5    1.01    0.12
   2   4  -5    1.12    0.15
  -1  -4   5    0.77    0.14
   1  -4  -5    0.60    0.14
  -1  -4   5    0.76    0.15
   1   4  -5    0.49    0.13
  -1   4   5    0.71    0.13
   1   4  -5    0.47    0.14
   0  -4  -5    1.10    0.15
   0  -4   5    1.06    0.13
   0   4   5    0.80    0.13
   0   4  -5    1.14    0.14
   0   4  -5    1.33    0.15
  -1  -4  -5    0.29    0.14
   1  -4   5    0.14    0.11
  -1   4  -5    0.24    0.11
  -1   4  -5    0.19    0.12
   1   4   5   -0.01    0.12
  -2  -4  -5   33.26    0.87
   2  -4   5   32.78    0.83
   2   4   5   32.79    0.86
  -2   4  -5   31.71    0.83
  -2   4  -5   32.06    0.84
   3  -4   5    0.11    0.10
  -3  -4  -5   -0.05    0.15
  -3   4  -5    0.14    0.10
  -3   4  -5    0.23    0.10
   3   4   5    0.05    0.15
   4  -4   5   64.71    1.57
  -4  -4  -5   63.90    1.62
  -4   4  -5   62.89    1.57
  -4   4  -5   63.30    1.57
   4   4   5   63.36    1.61
  -5  -4  -5    1.60    0.18
   5  -4   5    1.56    0.16
   5   4   5    1.76    0.20
  -5   4  -5    1.51    0.16
  -5   4  -5    1.60    0.14
   6  -4   5   15.50    0.42
  -6  -4  -5   16.02    0.53
  -6   4  -5   15.63    0.42
  -6   4  -5   14.84    0.42
   7  -4   5    0.16    0.09
  -7   4  -5    0.12    0.09
  -7   4  -5    0.26    0.08
   7   4   5    0.30    0.18
  -8  -4  -5    0.03    0.19
   8  -4   5    0.13    0.08
   8   4   5   -0.18    0.18
   9  -4   5   10.04    0.29
  -9  -4  -5   10.63    0.47
   9   4   5   10.11    0.44
 -10  -4  -5    4.63    0.40
  10   4   5    4.92    0.36
 -11  -4  -5   -0.17    0.22
  11   4   5   -0.08    0.19
  11   4   5   -0.16    0.21
 -12  -4  -5   -0.09    0.23
  12   4   5   -0.09    0.23
 -12  -5   5    4.23    0.47
  12   5  -5    3.98    0.33
 -11  -5   5    9.45    0.51
  11   5  -5    8.13    0.47
  11   5  -5    8.81    0.50
 -10  -5   5    0.96    0.25
  10   5  -5    0.35    0.20
  10   5  -5    1.05    0.40
  -9  -5   5    5.08    0.41
   9  -5  -5    5.14    0.19
   9   5  -5    5.56    0.41
   9   5  -5    5.51    0.38
  -8  -5   5   -0.13    0.21
   8  -5  -5    0.04    0.09
   8  -5  -5    0.10    0.10
   8   5  -5   -0.15    0.18
   8   5  -5    0.09    0.19
  -7  -5   5    0.66    0.19
  -7  -5   5    0.54    0.22
   7  -5  -5    0.69    0.11
   7   5  -5    0.83    0.21
   7   5  -5    0.58    0.20
  -7   5   5    0.74    0.09
  -6  -5   5   10.75    0.47
  -6  -5   5   10.88    0.44
  -6   5   5   10.43    0.32
   6   5  -5   10.83    0.45
   6   5  -5   11.17    0.45
  -5  -5   5    1.33    0.21
  -5  -5   5    1.01    0.18
   5  -5  -5    1.01    0.12
  -5   5   5    1.05    0.12
   5   5  -5    0.83    0.18
   5   5  -5    0.88    0.19
  -4  -5   5    0.62    0.16
   4  -5  -5    0.73    0.12
  -4  -5   5    0.55    0.19
   4   5  -5    0.49    0.18
  -4   5   5    0.63    0.11
   4   5  -5    0.56    0.17
  -3  -5   5    0.14    0.15
  -3  -5   5   -0.09    0.16
   3  -5  -5    0.10    0.12
   3   5  -5   -0.23    0.14
   3   5  -5   -0.09    0.15
  -3   5   5   -0.11    0.11
  -2  -5   5   36.42    0.96
   2  -5  -5   37.66    0.95
  -2  -5   5   37.11    0.97
  -2   5   5   36.66    0.94
   2   5  -5   36.22    0.97
   2   5  -5   35.78    0.97
  -1  -5   5    4.05    0.26
   1  -5  -5    3.68    0.25
  -1  -5   5    3.57    0.28
   1   5  -5    3.47    0.27
   1   5  -5    3.55    0.26
  -1   5   5    3.10    0.24
   0  -5  -5    1.04    0.15
   0  -5   5    1.09    0.14
   0  -5   5    1.10    0.16
   0   5  -5    1.15    0.14
   0   5  -5    1.26    0.15
   0   5   5    1.16    0.15
  -1  -5  -5   40.80    1.02
   1  -5   5   37.94    1.00
  -1   5  -5   39.11    1.01
  -1   5  -5   38.34    1.00
   1   5   5   38.90    1.02
  -2  -5  -5   18.16    0.55
   2  -5   5   17.43    0.49
  -2   5  -5   16.60    0.49
   2   5   5   17.33    0.53
  -2   5  -5   17.21    0.50
  -3  -5  -5    1.22    0.17
   3  -5   5    0.92    0.12
  -3   5  -5    1.20    0.12
  -3   5  -5    1.02    0.12
   3   5   5    1.37    0.18
   4  -5   5    2.83    0.19
  -4  -5  -5    1.95    0.19
   4   5   5    2.71    0.21
  -4   5  -5    2.59    0.20
  -4   5  -5    2.76    0.19
   5  -5   5    7.22    0.25
  -5  -5  -5    7.25    0.39
   5   5   5    7.18    0.38
  -5   5  -5    6.76    0.25
  -5   5  -5    6.55    0.25
  -6  -5  -5    0.85    0.21
   6  -5   5    0.75    0.10
  -6   5  -5    0.83    0.10
  -6   5  -5    0.88    0.09
   6   5   5    0.42    0.20
   7  -5   5    4.35    0.18
  -7  -5  -5    4.77    0.38
   7   5   5    4.37    0.37
  -8  -5  -5    0.38    0.22
   8   5   5    0.07    0.19
  -9  -5  -5    1.40    0.25
   9   5   5    2.20    0.23
 -10  -5  -5   -0.20    0.22
  10   5   5   -0.14    0.23
  10   5   5    0.07    0.20
 -11  -5  -5    4.18    0.43
  11   5   5    3.81    0.31
  11   5   5    4.41    0.43
 -12  -5  -5   -0.07    0.25
  12   5   5   -0.27    0.26
  12   6  -5    4.97    0.49
 -11  -6   5    8.35    0.51
  11   6  -5    7.96    0.51
 -10  -6   5    5.09    0.45
  10   6  -5    4.42    0.46
  10   6  -5    4.15    0.41
  -9  -6   5    2.84    0.28
   9   6  -5    3.64    0.30
   9   6  -5    2.97    0.26
   8  -6  -5    0.12    0.09
   8  -6  -5    0.27    0.07
  -8  -6   5   -0.03    0.22
   8   6  -5   -0.09    0.20
   8   6  -5    0.42    0.21
   7  -6  -5   13.28    0.38
  -7  -6   5   13.57    0.56
   7   6  -5   13.55    0.55
   7   6  -5   14.56    0.54
  -6  -6   5    0.11    0.19
   6  -6  -5    0.00    0.13
  -6  -6   5    0.07    0.25
   6   6  -5    0.24    0.19
   6   6  -5    0.31    0.19
  -6   6   5   -0.06    0.09
   5  -6  -5    0.61    0.12
  -5  -6   5    0.56    0.21
  -5  -6   5    0.44    0.21
  -5   6   5    0.50    0.11
   5   6  -5    0.77    0.27
   5   6  -5    0.55    0.19
  -4  -6   5   16.85    0.55
  -4  -6   5   16.31    0.57
   4  -6  -5   15.85    0.48
  -4   6   5   16.33    0.47
   4   6  -5   16.67    0.56
   4   6  -5   16.62    0.54
   3  -6  -5    4.59    0.26
  -3  -6   5    4.91    0.32
  -3  -6   5    4.57    0.35
   3   6  -5    4.73    0.33
   3   6  -5    4.32    0.33
  -3   6   5    4.64    0.25
  -2  -6   5    0.37    0.17
   2  -6  -5    0.29    0.14
  -2  -6   5    0.42    0.16
  -2   6   5    0.38    0.13
   2   6  -5    0.34    0.16
   2   6  -5   -0.02    0.15
   1  -6  -5   43.53    1.15
  -1  -6   5   45.95    1.17
  -1  -6   5   44.72    1.16
   1   6  -5   43.95    1.16
  -1   6   5   44.29    1.15
   1   6  -5   45.48    1.16
   0  -6   5    2.66    0.27
   0  -6   5    2.47    0.24
   0  -6  -5    2.53    0.28
   0   6  -5    2.58    0.26
   0   6   5    2.70    0.26
   0   6  -5    2.75    0.26
   1  -6   5    1.56    0.16
   1  -6   5    1.52    0.15
  -1  -6  -5    1.45    0.17
  -1   6  -5    1.65    0.16
  -1   6  -5    1.13    0.15
   1   6   5    1.53    0.17
  -2  -6  -5    1.67    0.20
   2  -6   5    1.85    0.15
  -2   6  -5    2.04    0.22
   2   6   5    2.12    0.20
  -2   6  -5    2.10    0.23
  -3  -6  -5    4.49    0.35
   3  -6   5    4.47    0.24
   3   6   5    4.43    0.35
  -3   6  -5    4.34    0.24
  -3   6  -5    4.27    0.24
  -4  -6  -5    5.08    0.37
   4  -6   5    4.85    0.24
  -4   6  -5    5.20    0.25
  -4   6  -5    4.66    0.23
   4   6   5    5.11    0.36
   5  -6   5    0.31    0.11
  -5  -6  -5    0.26    0.20
  -5   6  -5    0.07    0.10
  -5   6  -5    0.08    0.10
   5   6   5   -0.06    0.19
  -6  -6  -5    0.27    0.19
   6  -6   5    0.32    0.09
   6   6   5    0.22    0.20
  -6   6  -5    0.21    0.08
  -7  -6  -5    0.01    0.20
   7  -6   5   -0.16    0.08
   7   6   5   -0.16    0.19
  -8  -6  -5    3.48    0.29
   8   6   5    3.86    0.37
  -9  -6  -5    5.47    0.44
   9   6   5    4.63    0.38
   9   6   5    5.38    0.45
 -10  -6  -5    0.01    0.25
  10   6   5    0.01    0.21
  10   6   5   -0.23    0.25
 -11  -6  -5   -0.30    0.25
  11   6   5    0.01    0.26
 -11  -7   5    1.14    0.34
  11   7  -5    1.41    0.29
 -10  -7   5    0.46    0.26
  10   7  -5    0.53    0.27
  10   7  -5    0.69    0.33
  -9  -7   5    1.83    0.28
   9   7  -5    1.88    0.28
   9   7  -5    1.88    0.26
  -8  -7   5   20.07    0.70
   8   7  -5   20.16    0.69
   8   7  -5   18.75    0.67
  -7  -7   5   24.63    0.80
   7  -7  -5   25.18    0.65
   7   7  -5   25.11    0.78
   7   7  -5   25.53    0.80
  -6  -7   5    2.38    0.27
   6  -7  -5    2.17    0.19
   6   7  -5    2.03    0.24
  -6   7   5    2.06    0.17
   6   7  -5    2.42    0.25
   5  -7  -5   -0.02    0.12
  -5  -7   5    0.10    0.19
  -5  -7   5    0.39    0.23
   5   7  -5    0.05    0.19
   5   7  -5    0.10    0.19
  -5   7   5    0.00    0.12
  -4  -7   5    3.51    0.33
  -4  -7   5    3.26    0.27
   4  -7  -5    3.80    0.25
  -4   7   5    3.52    0.23
   4   7  -5    4.12    0.35
   4   7  -5    3.48    0.40
  -3  -7   5    0.83    0.19
  -3  -7   5    0.75    0.21
   3  -7  -5    0.86    0.15
  -3   7   5    0.61    0.14
   3   7  -5    0.43    0.18
   3   7  -5    0.73    0.19
  -2  -7   5    0.21    0.18
  -2  -7   5    0.12    0.16
   2  -7  -5    0.05    0.14
  -2   7   5    0.08    0.14
   2   7  -5   -0.02    0.16
   2   7  -5    0.06    0.18
  -1  -7   5   30.55    0.86
   1  -7  -5   30.50    0.83
  -1   7   5   29.75    0.83
   1   7  -5   31.32    0.84
   1   7  -5   30.03    0.85
   0  -7  -5    1.89    0.19
   0  -7   5    1.89    0.20
   0  -7   5    1.85    0.20
   0   7  -5    2.04    0.19
   0   7   5    2.16    0.18
   0   7  -5    1.97    0.19
   1  -7   5    0.16    0.16
  -1  -7  -5   -0.17    0.17
   1  -7   5    0.12    0.14
  -1   7  -5    0.21    0.15
  -1   7  -5   -0.11    0.15
   1   7   5    0.17    0.17
  -2  -7  -5   28.94    0.83
   2  -7   5   29.28    0.78
   2   7   5   29.04    0.83
  -2   7  -5   28.84    0.79
  -2   7  -5   29.07    0.78
   3  -7   5    6.15    0.28
  -3  -7  -5    5.81    0.40
  -3   7  -5    5.81    0.28
  -3   7  -5    6.34    0.28
   3   7   5    5.78    0.39
  -5  -7  -5    6.64    0.70
   5  -7   5    9.09    0.31
  -5   7  -5    9.18    0.30
  -5   7  -5    8.97    0.30
   5   7   5    9.10    0.45
  -6  -7  -5    0.58    0.24
   6  -7   5    0.72    0.10
   6   7   5    0.74    0.22
  -7  -7  -5    4.16    0.43
   7   7   5    3.28    0.27
  -8  -7  -5    2.45    0.28
   8   7   5    2.28    0.28
   8   7   5    2.22    0.24
  -9  -7  -5    0.03    0.25
   9   7   5    0.49    0.23
   9   7   5    0.37    0.24
 -10  -7  -5    2.26    0.30
  10   7   5    1.70    0.30
  11   7   5    1.66    0.32
 -10  -8   5    0.70    0.29
  10   8  -5    1.04    0.29
  -9  -8   5   -0.15    0.27
   9   8  -5    0.08    0.25
   9   8  -5   -0.25    0.19
  -8  -8   5    0.96    0.28
   8   8  -5    0.57    0.26
   8   8  -5    0.65    0.24
  -7  -8   5   32.71    1.01
   7  -8  -5   32.98    0.85
   7   8  -5   33.09    0.98
   7   8  -5   34.32    0.98
  -6  -8   5   30.69    0.92
   6  -8  -5   29.13    0.78
  -6   8   5   29.76    0.76
   6   8  -5   30.30    0.90
   6   8  -5   29.56    0.89
  -6   8   5   29.94    0.76
   5  -8  -5   -0.03    0.12
  -5  -8   5    0.03    0.24
   5   8  -5   -0.36    0.22
   5   8  -5    0.09    0.19
  -5   8   5    0.27    0.12
   4  -8  -5    5.61    0.28
  -4  -8   5    5.75    0.43
   4   8  -5    5.41    0.40
   4   8  -5    6.08    0.39
  -4   8   5    5.88    0.26
  -3  -8   5   -0.04    0.22
  -3  -8   5    0.13    0.19
   3  -8  -5    0.06    0.14
  -3   8   5   -0.26    0.13
   3   8  -5    0.00    0.18
   3   8  -5    0.13    0.19
  -2  -8   5   19.43    0.65
  -2  -8   5   20.40    0.62
   2  -8  -5   18.85    0.59
   2   8  -5   19.49    0.63
   2   8  -5   20.14    0.62
  -2   8   5   19.44    0.58
  -1  -8   5    9.84    0.40
   1  -8  -5   10.17    0.41
  -1  -8   5    9.41    0.44
  -1   8   5    9.69    0.39
   1   8  -5    9.28    0.43
   1   8  -5    9.96    0.42
   0  -8   5    0.21    0.18
   0  -8   5    0.46    0.16
   0  -8  -5    0.13    0.17
   0   8   5    0.33    0.17
   0   8  -5    0.69    0.33
   0   8  -5    0.28    0.17
   1  -8   5   11.60    0.45
   1  -8   5   12.49    0.44
  -1  -8  -5   11.82    0.48
   1   8   5   12.03    0.47
  -1   8  -5   11.98    0.44
  -1   8  -5   12.37    0.44
   2  -8   5    1.70    0.17
  -2  -8  -5    1.86    0.23
  -2   8  -5    1.89    0.18
   2   8   5    1.73    0.21
  -2   8  -5    1.90    0.18
   3  -8   5   75.38    1.87
  -3  -8  -5   74.91    1.93
  -3   8  -5   74.30    1.87
  -3   8  -5   74.83    1.87
   3   8   5   75.73    1.92
   4  -8   5    7.17    0.30
  -4  -8  -5    6.66    0.47
   4   8   5    6.78    0.42
  -4   8  -5    7.36    0.29
  -4   8  -5    7.27    0.29
  -5  -8  -5   24.44    0.78
   5   8   5   24.92    0.78
  -5   8  -5   24.61    0.65
  -5   8  -5   24.87    0.65
  -6  -8  -5    2.23    0.27
   6   8   5    2.30    0.24
  -7  -8  -5    4.33    0.46
   7   8   5    4.02    0.44
   7   8   5    4.31    0.41
  -8  -8  -5    2.00    0.28
   8   8   5    1.94    0.27
  -9  -8  -5    0.03    0.27
   9   8   5   -0.37    0.27
   9   8   5    0.13    0.27
 -10  -8  -5    3.52    0.35
  10   8   5    4.20    0.36
  -9  -9   5    8.28    0.58
   9   9  -5    8.86    0.55
  -8  -9   5    0.37    0.28
   8   9  -5    0.10    0.22
   8   9  -5    0.34    0.25
  -7  -9   5   -0.04    0.27
   7  -9  -5    0.39    0.12
   7   9  -5    0.56    0.25
   7   9  -5    0.75    0.24
   6  -9  -5    0.36    0.14
  -6  -9   5    0.44    0.26
  -6   9   5    0.39    0.11
   6   9  -5    0.27    0.25
  -6   9   5    0.33    0.10
   6   9  -5    0.50    0.23
  -5  -9   5    0.97    0.27
   5  -9  -5    0.96    0.13
   5   9  -5    0.92    0.22
   5   9  -5    1.24    0.26
  -5   9   5    0.98    0.15
   4  -9  -5    3.38    0.26
  -4  -9   5    3.51    0.31
   4   9  -5    3.88    0.38
   4   9  -5    4.47    0.44
  -4   9   5    4.04    0.25
  -4   9   5    3.49    0.26
  -3  -9   5    0.97    0.24
   3  -9  -5    0.68    0.16
  -3   9   5    0.77    0.15
   3   9  -5    0.94    0.28
   3   9  -5    0.90    0.21
  -2  -9   5    1.89    0.24
   2  -9  -5    1.82    0.20
   2   9  -5    1.81    0.21
   2   9  -5    2.32    0.24
  -2   9   5    2.07    0.18
  -1  -9   5    0.44    0.20
   1  -9  -5    0.02    0.18
  -1   9   5    0.13    0.16
   1   9  -5   -0.02    0.19
   1   9  -5    0.35    0.19
   0  -9   5    5.39    0.37
   0  -9  -5    5.25    0.36
   0   9   5    4.93    0.34
   0   9  -5    4.86    0.35
   0   9  -5    4.76    0.34
  -1  -9  -5    1.28    0.21
   1  -9   5    1.35    0.20
  -1   9  -5    1.20    0.19
   1   9   5    1.71    0.20
  -1   9  -5    1.16    0.19
   2  -9   5    1.50    0.19
  -2  -9  -5    1.40    0.22
  -2   9  -5    1.30    0.17
  -2   9  -5    1.21    0.18
   2   9   5    1.76    0.23
  -3  -9  -5    3.82    0.41
  -3   9  -5    3.78    0.28
  -3   9  -5    3.79    0.27
   3   9   5    4.17    0.40
  -4  -9  -5    3.18    0.29
  -4   9  -5    3.60    0.25
  -4   9  -5    3.80    0.31
   4   9   5    3.99    0.43
  -5  -9  -5    0.58    0.26
   5   9   5    0.77    0.25
  -5   9  -5    0.85    0.13
  -5   9  -5    1.07    0.13
  -6  -9  -5    1.70    0.28
   6   9   5    1.43    0.27
   6   9   5    1.43    0.27
  -7  -9  -5    2.19    0.28
   7   9   5    2.03    0.27
   7   9   5    2.11    0.27
  -8  -9  -5    0.12    0.29
   8   9   5    0.02    0.21
   8   9   5   -0.12    0.26
  -9  -9  -5    0.10    0.28
   9   9   5    0.59    0.30
  -8 -10   5    2.11    0.34
   8  10  -5    1.91    0.31
  -7 -10   5    7.30    0.57
   7 -10  -5    5.75    0.26
   7  10  -5    6.75    0.48
   7  10  -5    5.21    0.46
   6 -10  -5    0.02    0.21
  -6 -10   5    0.44    0.28
  -6  10   5    0.32    0.11
  -6  10   5    0.27    0.12
   6  10  -5    0.05    0.23
   6  10  -5    0.12    0.25
  -5 -10   5    0.90    0.29
   5 -10  -5    0.47    0.13
   5  10  -5    0.72    0.27
   5  10  -5    0.52    0.24
  -5  10   5    0.86    0.15
  -5  10   5    0.77    0.17
   4 -10  -5    0.97    0.16
  -4 -10   5    1.14    0.28
   4  10  -5    0.93    0.23
   4  10  -5    1.20    0.26
  -4  10   5    1.29    0.14
  -4  10   5    1.11    0.16
   3 -10  -5    7.94    0.37
  -3 -10   5    8.08    0.52
  -3  10   5    7.81    0.35
   3  10  -5    8.15    0.48
   3  10  -5    7.54    0.45
  -3  10   5    7.69    0.35
   2 -10  -5   11.14    0.45
  -2 -10   5   10.98    0.53
   2  10  -5   11.06    0.48
  -2  10   5   10.60    0.42
   2  10  -5   10.10    0.56
  -2  10   5   10.73    0.42
   1 -10  -5    1.03    0.21
  -1 -10   5    0.86    0.23
  -1  10   5    0.85    0.20
   1  10  -5    1.22    0.23
  -1  10   5    0.65    0.19
   1  10  -5    0.72    0.21
   0 -10   5    2.40    0.25
   0 -10  -5    2.17    0.25
   0  10   5    2.70    0.23
   0  10  -5    2.32    0.23
   0  10   5    2.58    0.23
   0  10  -5    3.05    0.24
   1 -10   5    4.00    0.36
  -1 -10  -5    4.63    0.42
  -1  10  -5    4.51    0.34
   1  10   5    4.12    0.37
  -1  10  -5    3.98    0.33
   1  10   5    4.96    0.37
  -2 -10  -5    0.05    0.23
   2 -10   5    0.08    0.17
  -2  10  -5   -0.10    0.16
   2  10   5   -0.17    0.22
  -2  10  -5    0.01    0.16
   2  10   5    0.03    0.20
  -3 -10  -5    0.38    0.25
   3  10   5    0.63    0.25
   3  10   5    0.52    0.21
  -3  10  -5    0.58    0.17
  -4 -10  -5    2.67    0.30
  -4  10  -5    2.35    0.25
   4  10   5    2.56    0.27
   4  10   5    2.85    0.28
  -4  10  -5    2.56    0.25
  -5 -10  -5    0.13    0.26
   5  10   5    0.21    0.22
  -5  10  -5    0.22    0.13
  -5  10  -5    0.11    0.13
   5  10   5   -0.02    0.25
  -6 -10  -5    1.39    0.32
   6  10   5    1.06    0.28
   6  10   5    1.58    0.25
  -7 -10  -5   10.14    0.62
   7  10   5   10.88    0.53
   7  10   5   10.90    0.58
  -8 -10  -5    4.65    0.39
   8  10   5    4.46    0.37
  -6 -11   5    8.43    0.61
  -6  11   5    8.41    0.30
   6  11  -5    8.50    0.53
   6  11  -5    8.13    0.52
  -5 -11   5    3.94    0.37
   5 -11  -5    4.03    0.26
  -5  11   5    3.26    0.26
   5  11  -5    3.80    0.32
   5  11  -5    3.81    0.30
  -5  11   5    3.53    0.34
   4 -11  -5   -0.16    0.15
  -4 -11   5    0.02    0.29
   4  11  -5   -0.35    0.22
  -4  11   5    0.17    0.15
   4  11  -5    0.02    0.22
  -4  11   5   -0.04    0.16
  -3 -11   5   -0.30    0.27
   3 -11  -5   -0.11    0.16
   3  11  -5    0.07    0.24
  -3  11   5   -0.12    0.18
   3  11  -5   -0.29    0.21
  -3  11   5    0.02    0.17
  -2 -11   5    5.25    0.58
   2 -11  -5    6.89    0.38
  -2  11   5    6.88    0.36
   2  11  -5    6.41    0.43
  -2  11   5    6.46    0.37
   2  11  -5    6.17    0.45
   1 -11  -5    0.89    0.21
  -1 -11   5    0.45    0.25
   1  11  -5    0.65    0.22
  -1  11   5    0.62    0.20
  -1  11   5    0.88    0.21
   1  11  -5    0.70    0.22
   0 -11  -5    1.81    0.26
   0 -11   5    1.70    0.26
   0  11  -5    2.35    0.24
   0  11   5    2.19    0.24
   0  11   5    1.64    0.23
   0  11  -5    2.09    0.23
  -1 -11  -5    0.33    0.23
   1 -11   5   -0.43    0.19
   1  11   5   -0.06    0.20
   1  11   5    0.04    0.24
  -1  11  -5    0.36    0.19
  -1  11  -5    0.30    0.19
  -2 -11  -5    2.84    0.31
   2 -11   5    2.95    0.24
  -2  11  -5    3.13    0.32
   2  11   5    2.65    0.27
  -2  11  -5    3.05    0.32
   2  11   5    2.82    0.27
  -3 -11  -5   17.59    0.70
  -3  11  -5   17.45    0.56
  -3  11  -5   17.40    0.57
   3  11   5   18.73    0.65
   3  11   5   17.26    0.65
  -4 -11  -5   14.98    0.67
   4  11   5   14.57    0.59
   4  11   5   15.77    0.62
  -4  11  -5   15.53    0.48
  -4  11  -5   14.62    0.51
  -5 -11  -5    1.43    0.33
  -5  11  -5    1.00    0.15
   5  11   5    1.47    0.28
   5  11   5    1.28    0.27
  -5  11  -5    1.21    0.14
  -6 -11  -5    0.79    0.32
   6  11   5    0.57    0.27
   6  11   5    0.50    0.28
  -4 -12   5    2.16    0.34
  -4  12   5    2.38    0.20
   4  12  -5    2.37    0.31
   3 -12  -5    1.16    0.21
  -3 -12   5    1.23    0.30
  -3  12   5    1.33    0.20
   3  12  -5    1.14    0.24
   3  12  -5    0.88    0.26
  -2 -12   5    2.42    0.31
   2 -12  -5    2.39    0.25
   2  12  -5    1.93    0.26
  -2  12   5    1.97    0.21
  -2  12   5    1.85    0.27
   2  12  -5    2.01    0.27
   1 -12  -5    3.58    0.40
  -1 -12   5    4.57    0.46
  -1  12   5    4.11    0.35
  -1  12   5    3.92    0.29
   1  12  -5    3.95    0.41
   1  12  -5    4.24    0.45
   0 -12   5    0.67    0.25
   0 -12  -5    0.64    0.26
   0  12   5    0.97    0.22
   0  12   5    0.46    0.24
   0  12  -5    0.92    0.22
   0  12  -5    0.78    0.25
   1 -12   5    1.90    0.25
  -1 -12  -5    1.90    0.30
   1  12   5    2.01    0.25
  -1  12  -5    2.03    0.24
   1  12   5    1.99    0.26
  -1  12  -5    2.57    0.27
  -2 -12  -5    0.43    0.28
  -2  12  -5    0.13    0.24
  -2  12  -5    0.33    0.19
   2  12   5   -0.09    0.24
   2  12   5   -0.06    0.22
  -3 -12  -5    0.74    0.30
  -3  12  -5    0.36    0.18
   3  12   5    0.33    0.23
   3  12   5   -0.09    0.25
  -4 -12  -5    5.91    0.56
  -4  12  -5    6.45    0.33
   4  12   5    6.82    0.47
  13   0  -6    1.12    0.18
  12   0  -6   12.54    0.44
  12   0  -6   11.21    0.44
  11   0  -6   -0.20    0.16
  11   0  -6    0.24    0.15
  10   0  -6    0.13    0.16
  10   0  -6    0.20    0.16
  -9   0   6    0.15    0.15
   9   0  -6    0.08    0.16
   9   0  -6    0.10    0.15
   8   0  -6   21.87    0.64
  -8   0   6   22.66    0.63
   8   0  -6   22.06    0.65
   7   0  -6   10.21    0.38
  -7   0   6   10.35    0.37
   7   0  -6    9.96    0.37
  -6   0   6   18.08    0.53
   6   0  -6   18.69    0.54
   6   0  -6   17.90    0.53
  -5   0   6    6.66    0.28
   5   0  -6    6.35    0.29
   5   0  -6    6.34    0.29
   4   0  -6   37.78    0.98
  -4   0   6   38.45    0.98
   4   0  -6   38.65    0.99
  -3   0   6   77.45    1.94
   3   0  -6   79.24    1.94
  -2   0   6    4.50    0.25
   2   0  -6    5.09    0.26
  -1   0   6  499.57   11.90
   1   0  -6  473.49   11.88
   0   0   6   61.57    1.52
   0   0  -6   60.63    1.52
  -1   0  -6   36.85    0.94
   1   0   6   36.13    0.94
   2   0   6   34.10    0.87
  -2   0  -6   33.39    0.88
  -3   0  -6   70.95    1.74
   3   0   6   69.46    1.74
  -4   0  -6   45.99    1.16
   4   0   6   45.35    1.16
  -5   0  -6   -0.04    0.12
   5   0   6    0.07    0.12
  -6   0  -6    2.40    0.25
   6   0   6    2.13    0.23
   7   0   6    1.98    0.18
  -7   0  -6    1.76    0.18
   8   0   6   19.04    0.58
  -8   0  -6   19.60    0.58
   9   0   6   74.29    1.87
  10   0   6    8.72    0.38
 -10   0  -6    8.86    0.38
  11   0   6    0.44    0.17
 -11   0  -6    0.62    0.18
  12   0   6    0.12    0.16
 -12   0  -6    0.12    0.18
  12   0   6    0.27    0.16
 -13   0  -6    2.13    0.23
  13   0   6    2.13    0.19
  13  -1  -6    6.61    0.35
  13   1  -6    7.54    0.54
  13   1  -6    8.97    0.45
  12  -1  -6    0.46    0.14
  12  -1  -6   -0.25    0.15
  12   1  -6    0.31    0.19
  12   1  -6   -0.18    0.17
  11  -1  -6    3.40    0.28
  11  -1  -6    3.33    0.26
  11   1  -6    2.95    0.32
  11   1  -6    3.46    0.31
  10  -1  -6   -0.17    0.15
  10  -1  -6    0.23    0.14
  10   1  -6    0.24    0.17
  10   1  -6   -0.04    0.17
   9  -1  -6    1.94    0.17
  -9  -1   6    2.07    0.18
   9  -1  -6    2.11    0.18
   9   1  -6    1.74    0.19
   9   1  -6    2.05    0.20
  -9   1   6    2.00    0.22
   8  -1  -6    3.73    0.26
  -8  -1   6    3.51    0.28
   8   1  -6    3.79    0.31
   8   1  -6    3.59    0.30
  -8   1   6    3.38    0.24
   7  -1  -6    2.82    0.26
   7  -1  -6    2.29    0.24
  -7  -1   6    2.86    0.26
   7   1  -6    2.33    0.19
  -7   1   6    2.82    0.23
   7   1  -6    2.50    0.28
   6  -1  -6    9.64    0.35
   6  -1  -6    9.36    0.34
  -6  -1   6    9.59    0.36
   6   1  -6    9.80    0.37
   6   1  -6    9.39    0.37
  -6   1   6    9.33    0.33
   5  -1  -6    0.20    0.12
   5  -1  -6    0.28    0.12
  -5  -1   6    0.30    0.13
   5   1  -6    0.26    0.13
   5   1  -6    0.35    0.14
  -5   1   6    0.34    0.12
   4  -1  -6   26.25    0.69
  -4  -1   6   25.88    0.70
   4   1  -6   26.29    0.71
  -4   1   6   25.39    0.68
   4   1  -6   25.63    0.70
  -3  -1   6    0.31    0.12
   3  -1  -6    0.44    0.12
   3   1  -6    0.46    0.14
  -3   1   6    0.30    0.11
   3   1  -6    0.57    0.13
  -2  -1   6   24.37    0.64
   2  -1  -6   23.51    0.64
  -2   1   6   22.82    0.63
   2   1  -6   24.14    0.65
   1  -1  -6  482.54   12.21
  -1  -1   6  513.06   12.23
  -1   1   6  528.01   12.25
   1   1  -6  479.58   12.22
   0  -1  -6    5.08    0.27
   0   1  -6    5.88    0.26
   0   1   6    5.76    0.27
   1  -1   6    2.40    0.21
  -1  -1  -6    2.03    0.17
  -1   1  -6    2.07    0.22
   1   1   6    1.97    0.15
   2  -1   6   58.81    1.48
  -2  -1  -6   60.01    1.48
   2   1   6   59.72    1.48
  -2   1  -6   58.69    1.48
   3  -1   6    1.80    0.20
  -3  -1  -6    1.32    0.14
  -3   1  -6    1.69    0.14
   3   1   6    1.46    0.14
  -4  -1  -6   40.62    1.06
   4  -1   6   41.44    1.05
   4   1   6   41.95    1.06
  -4   1  -6   41.26    1.05
   5  -1   6   22.46    0.61
  -5  -1  -6   22.50    0.63
   5   1   6   22.47    0.62
  -5   1  -6   22.16    0.61
  -6  -1  -6    9.63    0.37
   6  -1   6    9.45    0.34
  -6   1  -6    9.32    0.34
   6   1   6    9.40    0.36
  -7  -1  -6    3.23    0.29
   7  -1   6    3.35    0.24
  -7   1  -6    2.92    0.25
   7   1   6    2.69    0.22
   8  -1   6   37.98    1.21
  -8  -1  -6   45.34    1.16
  -8   1  -6   45.49    1.13
   8   1   6   46.48    1.16
  -9  -1  -6  175.27    4.28
   9  -1   6  173.95    4.26
   9   1   6  174.52    4.27
  -9   1  -6  172.68    4.26
  10  -1   6    9.96    0.37
 -10  -1  -6    9.63    0.43
 -10   1  -6    9.70    0.38
  10   1   6   10.51    0.40
 -11  -1  -6    1.98    0.22
  11  -1   6    2.03    0.18
  11   1   6    1.71    0.20
 -11   1  -6    1.69    0.19
  12  -1   6    1.45    0.17
 -12  -1  -6    1.65    0.22
  12  -1   6    1.74    0.16
 -12   1  -6    1.55    0.19
  12   1   6    1.65    0.18
  12   1   6    1.53    0.19
 -13  -1  -6    0.24    0.21
  13  -1   6    0.05    0.15
 -13   1  -6    0.40    0.17
  13  -2  -6   -0.18    0.15
  13   2  -6    0.07    0.22
  12  -2  -6    0.10    0.14
  12  -2  -6    0.09    0.13
  12   2  -6    0.28    0.21
  12   2  -6    0.41    0.19
  11  -2  -6    0.30    0.15
  11  -2  -6    0.53    0.13
  11   2  -6    0.27    0.20
  11   2  -6    0.22    0.18
  10  -2  -6   11.91    0.39
  10  -2  -6   11.83    0.41
  10   2  -6   12.15    0.47
  10   2  -6   12.30    0.47
  -9  -2   6    0.19    0.16
   9  -2  -6    0.42    0.13
   9  -2  -6    0.11    0.14
  -9   2   6    0.12    0.11
   9   2  -6    0.59    0.18
   9   2  -6    0.40    0.18
   8  -2  -6    6.04    0.28
   8  -2  -6    6.33    0.30
  -8  -2   6    6.13    0.34
   8   2  -6    5.68    0.35
   8   2  -6    5.88    0.35
  -8   2   6    6.11    0.27
   7  -2  -6    3.32    0.23
   7  -2  -6    2.81    0.24
  -7  -2   6    3.22    0.29
   7   2  -6    3.40    0.30
   7   2  -6    3.61    0.31
  -7   2   6    3.34    0.22
  -6  -2   6   60.25    1.52
   6  -2  -6   60.71    1.50
   6  -2  -6   58.96    1.50
   6   2  -6   61.47    1.52
   6   2  -6   59.86    1.53
  -6   2   6   58.41    1.49
   5  -2  -6    0.38    0.12
  -5  -2   6    0.49    0.14
  -5   2   6    0.38    0.11
   5   2  -6    0.50    0.15
   5   2  -6    0.29    0.15
   4  -2  -6    3.67    0.22
  -4  -2   6    3.51    0.25
   4   2  -6    3.28    0.26
  -4   2   6    3.55    0.21
   4   2  -6    3.83    0.26
  -3  -2   6   44.21    1.13
   3  -2  -6   43.84    1.12
   3   2  -6   42.63    1.14
  -3   2   6   45.68    1.12
   3   2  -6   44.86    1.13
   2  -2  -6    3.23    0.23
  -2  -2   6    3.15    0.24
   2   2  -6    3.04    0.24
   2   2  -6    3.15    0.24
  -2   2   6    3.29    0.22
   1  -2  -6    2.55    0.23
  -1  -2   6    2.77    0.23
  -1   2   6    2.13    0.22
   1   2  -6    2.86    0.23
   1   2  -6    2.77    0.24
   0  -2  -6    3.38    0.24
   0  -2   6    3.08    0.23
   0   2  -6    3.10    0.23
   0   2   6    2.92    0.23
   1  -2   6    0.66    0.12
  -1  -2  -6    0.71    0.14
  -1   2  -6    0.50    0.12
   1   2   6    0.64    0.14
   2  -2   6    2.96    0.21
  -2  -2  -6    3.10    0.25
   2   2   6    3.03    0.25
  -2   2  -6    2.71    0.22
   3  -2   6   28.35    0.73
  -3  -2  -6   27.74    0.76
  -3   2  -6   27.22    0.73
   3   2   6   28.51    0.75
   4  -2   6  136.53    3.30
  -4  -2  -6  135.47    3.32
  -4   2  -6  134.82    3.30
   4   2   6  133.37    3.31
   5  -2   6    0.70    0.12
  -5  -2  -6    0.78    0.16
   5   2   6    0.55    0.14
  -5   2  -6    0.76    0.13
  -6  -2  -6    0.09    0.16
   6  -2   6    0.08    0.12
  -6   2  -6    0.12    0.12
   6   2   6    0.11    0.14
  -7  -2  -6    1.07    0.19
   7  -2   6    1.16    0.14
  -7   2  -6    1.18    0.14
   7   2   6    1.33    0.18
  -8  -2  -6    0.22    0.18
   8  -2   6    0.38    0.13
  -8   2  -6    0.47    0.13
   8   2   6    0.29    0.16
  -9  -2  -6    0.41    0.18
   9  -2   6    0.24    0.12
   9   2   6    0.52    0.18
  -9   2  -6    0.36    0.14
  10  -2   6    2.52    0.23
 -10  -2  -6    2.51    0.24
 -10   2  -6    2.28    0.24
  10   2   6    2.18    0.22
 -11  -2  -6    0.11    0.20
  11  -2   6    0.66    0.14
 -11   2  -6    0.44    0.14
  11   2   6    0.59    0.18
 -12  -2  -6   17.43    0.60
  12  -2   6   16.68    0.51
 -12   2  -6   16.85    0.50
  12   2   6   16.56    0.60
  12   2   6   16.21    0.57
  13  -2   6   13.34    0.43
 -13  -2  -6   11.88    0.53
 -13   2  -6   11.78    0.38
  13  -3  -6    0.14    0.15
  13   3  -6   -0.33    0.23
  12  -3  -6    3.62    0.26
  12  -3  -6    3.72    0.24
  12   3  -6    3.59    0.38
  12   3  -6    4.17    0.43
  11  -3  -6    0.02    0.14
  11  -3  -6   -0.03    0.22
  11   3  -6    0.20    0.21
  11   3  -6    0.36    0.20
  10  -3  -6    1.55    0.15
  10   3  -6    0.91    0.19
  10   3  -6    1.63    0.22
   9  -3  -6   18.93    0.56
  -9  -3   6   21.81    0.62
   9  -3  -6   19.65    0.55
   9   3  -6   20.11    0.63
  -9   3   6   17.20    0.62
   9   3  -6   19.96    0.63
  -8  -3   6    0.50    0.20
  -8  -3   6    0.09    0.17
   8  -3  -6    0.19    0.12
   8  -3  -6    0.42    0.14
  -8   3   6    0.21    0.12
   8   3  -6    0.41    0.19
   8   3  -6    0.10    0.18
  -7  -3   6   17.80    0.57
   7  -3  -6   17.67    0.51
  -7  -3   6   18.75    0.60
   7  -3  -6   18.53    0.52
   7   3  -6   18.01    0.58
  -7   3   6   18.47    0.51
   7   3  -6   18.11    0.58
   6  -3  -6    6.75    0.27
  -6  -3   6    6.29    0.37
  -6  -3   6    6.71    0.34
  -6   3   6    6.42    0.26
   6   3  -6    6.49    0.35
   6   3  -6    6.65    0.35
  -5  -3   6   -0.01    0.16
  -5  -3   6   -0.01    0.14
   5  -3  -6   -0.19    0.11
   5   3  -6    0.07    0.15
   5   3  -6    0.30    0.16
  -5   3   6    0.03    0.10
  -4  -3   6   25.51    0.71
   4  -3  -6   25.12    0.68
   4   3  -6   25.03    0.72
  -4   3   6   26.00    0.68
   4   3  -6   26.62    0.72
   3  -3  -6    9.57    0.33
  -3  -3   6    9.82    0.36
   3   3  -6    9.72    0.37
  -3   3   6   10.33    0.33
   3   3  -6    9.51    0.37
  -2  -3   6    5.53    0.28
   2  -3  -6    5.02    0.26
  -2   3   6    4.82    0.25
   2   3  -6    5.54    0.28
   2   3  -6    5.45    0.28
   1  -3  -6   -0.03    0.13
  -1  -3   6    0.04    0.12
   1   3  -6    0.10    0.13
   1   3  -6    0.00    0.14
  -1   3   6    0.10    0.12
   0  -3  -6    3.07    0.25
   0  -3   6    3.12    0.22
   0   3  -6    3.28    0.23
   0   3   6    3.08    0.24
   0   3  -6    2.73    0.23
   1  -3   6   52.05    1.30
  -1  -3  -6   51.33    1.31
   1   3   6   52.78    1.31
  -1   3  -6   51.04    1.30
  -1   3  -6   50.86    1.30
  -2  -3  -6   12.44    0.42
   2  -3   6   12.05    0.38
   2   3   6   12.42    0.41
  -2   3  -6   12.70    0.38
   3  -3   6   12.63    0.38
  -3  -3  -6   12.64    0.44
  -3   3  -6   12.46    0.38
   3   3   6   12.21    0.42
   4  -3   6   10.01    0.31
  -4  -3  -6    9.52    0.38
  -4   3  -6    8.71    0.31
   4   3   6    9.65    0.37
   5  -3   6    2.93    0.19
  -5  -3  -6    3.24    0.31
  -5   3  -6    2.88    0.21
   5   3   6    2.74    0.28
   6  -3   6   26.69    0.67
  -6  -3  -6   26.24    0.74
   6   3   6   22.59    0.76
  -6   3  -6   26.07    0.67
  -7  -3  -6    3.58    0.34
   7  -3   6    3.50    0.22
  -7   3  -6    3.41    0.22
   7   3   6    3.48    0.32
   8  -3   6    0.14    0.11
  -8  -3  -6    0.28    0.20
   8   3   6   -0.02    0.17
  -8   3  -6    0.21    0.12
  -9  -3  -6    7.59    0.41
  -9   3  -6    8.22    0.29
   9   3   6    7.96    0.39
 -10  -3  -6    0.09    0.20
  10  -3   6   -0.06    0.11
 -10   3  -6    0.21    0.11
  10   3   6    0.23    0.17
  11  -3   6    1.67    0.14
 -11  -3  -6    1.70    0.24
  11  -3   6    1.41    0.14
  11   3   6    1.27    0.20
  12  -3   6    0.18    0.12
  12  -3   6    0.08    0.12
 -12  -3  -6    0.23    0.22
  12   3   6    0.34    0.22
  12  -4  -6    0.25    0.14
  12  -4  -6    0.14    0.11
  12   4  -6    0.01    0.38
  11  -4  -6    2.01    0.21
  11  -4  -6    2.10    0.19
 -11  -4   6    1.68    0.26
  11   4  -6    1.69    0.23
  11   4  -6    1.92    0.25
  10  -4  -6   -0.01    0.12
  10  -4  -6    0.05    0.10
 -10  -4   6    0.35    0.23
  10   4  -6   -0.09    0.22
  10   4  -6    0.35    0.20
  -9  -4   6    4.86    0.40
   9  -4  -6    4.72    0.22
   9   4  -6    4.34    0.38
   9   4  -6    4.46    0.35
  -9   4   6    4.42    0.19
  -8  -4   6    1.33    0.19
  -8  -4   6    1.37    0.23
   8  -4  -6    1.50    0.14
  -8   4   6    1.50    0.12
   8   4  -6    1.27    0.21
   8   4  -6    1.38    0.21
  -7  -4   6    0.75    0.22
   7  -4  -6    0.61    0.14
  -7  -4   6    0.55    0.17
   7  -4  -6    0.53    0.13
   7   4  -6    0.29    0.20
   7   4  -6    0.30    0.20
  -7   4   6    0.55    0.12
  -6  -4   6   20.24    0.64
  -6  -4   6   20.53    0.62
   6  -4  -6   19.61    0.55
  -6   4   6   20.09    0.54
   6   4  -6   20.35    0.62
   6   4  -6   19.63    0.62
   5  -4  -6    0.15    0.12
  -5  -4   6    0.01    0.17
  -5  -4   6   -0.06    0.15
  -5   4   6    0.33    0.11
   5   4  -6    0.02    0.16
   5   4  -6    0.14    0.17
   4  -4  -6    4.99    0.24
  -4  -4   6    5.09    0.34
  -4  -4   6    4.88    0.31
  -4   4   6    4.55    0.23
   4   4  -6    5.00    0.32
   4   4  -6    4.62    0.32
   3  -4  -6   40.31    1.04
  -3  -4   6   40.50    1.07
  -3  -4   6   39.93    1.06
  -3   4   6   41.08    1.03
   3   4  -6   40.00    1.06
   3   4  -6   41.69    1.07
   2  -4  -6   16.61    0.50
  -2  -4   6   17.68    0.52
   2   4  -6   18.05    0.54
  -2   4   6   16.75    0.50
   2   4  -6   17.21    0.52
   1  -4  -6   91.79    2.27
  -1  -4   6   90.23    2.27
  -1   4   6   91.38    2.27
   1   4  -6   92.29    2.28
   1   4  -6   93.16    2.27
   0  -4  -6    0.07    0.14
   0  -4   6    0.18    0.12
   0   4   6    0.00    0.13
   0   4  -6    0.29    0.13
   0   4  -6    0.05    0.12
   1  -4   6   39.01    1.00
  -1  -4  -6   38.15    1.02
   1   4   6   38.97    1.02
  -1   4  -6   39.82    1.00
  -1   4  -6   39.86    1.01
   2  -4   6    1.32    0.13
  -2  -4  -6    1.32    0.17
  -2   4  -6    1.16    0.13
  -2   4  -6    1.46    0.14
   2   4   6    1.04    0.16
   3  -4   6    1.55    0.13
  -3  -4  -6    1.22    0.18
  -3   4  -6    2.06    0.19
   3   4   6    1.00    0.16
  -3   4  -6    1.30    0.13
   4  -4   6   28.93    0.74
  -4  -4  -6   27.43    0.79
   4   4   6   28.24    0.79
  -4   4  -6   28.30    0.74
  -4   4  -6   28.22    0.74
  -5  -4  -6    3.79    0.33
   5  -4   6    3.60    0.20
  -5   4  -6    4.08    0.21
   5   4   6    3.19    0.32
  -5   4  -6    3.56    0.22
  -6  -4  -6    0.09    0.18
   6  -4   6    0.28    0.11
  -6   4  -6    0.10    0.12
   6   4   6    0.14    0.18
  -6   4  -6    0.25    0.11
  -7  -4  -6    2.48    0.23
   7  -4   6    2.29    0.19
  -7   4  -6    2.69    0.18
   7   4   6    2.67    0.24
  -7   4  -6    2.25    0.19
   8  -4   6   10.19    0.31
  -8  -4  -6    9.95    0.46
   8   4   6    9.61    0.44
  -8   4  -6    9.55    0.30
  -8   4  -6   10.27    0.30
  -9  -4  -6    1.13    0.21
   9  -4   6    1.68    0.16
   9   4   6    1.37    0.21
 -10  -4  -6    6.04    0.43
  10   4   6    5.64    0.38
 -11  -4  -6    1.67    0.26
  11   4   6    1.48    0.23
  11   4   6    1.99    0.26
 -12  -4  -6    1.78    0.26
  12   4   6    1.99    0.27
 -12  -5   6    9.95    0.56
  12   5  -6    9.22    0.55
 -11  -5   6   20.89    0.74
  11   5  -6   20.57    0.74
  11   5  -6   22.50    0.82
  10  -5  -6    0.11    0.09
 -10  -5   6   -0.30    0.23
  10   5  -6    0.03    0.21
  10   5  -6    0.24    0.24
  -9  -5   6    0.50    0.23
   9  -5  -6    0.63    0.14
   9  -5  -6    0.68    0.10
   9   5  -6    0.60    0.19
   9   5  -6    0.67    0.25
  -8  -5   6    6.35    0.43
   8  -5  -6    6.75    0.26
   8  -5  -6    6.56    0.25
  -8   5   6    6.88    0.23
   8   5  -6    6.57    0.42
   8   5  -6    6.49    0.39
  -7  -5   6    0.31    0.17
  -7  -5   6    0.00    0.21
  -7   5   6    0.14    0.10
   7   5  -6    0.36    0.21
   7   5  -6   -0.01    0.20
  -6  -5   6    0.49    0.18
   6  -5  -6    0.62    0.12
  -6  -5   6    0.31    0.21
   6   5  -6    0.54    0.20
  -6   5   6    0.61    0.11
   6   5  -6    0.91    0.21
   5  -5  -6    2.94    0.23
  -5  -5   6    2.91    0.31
  -5  -5   6    2.77    0.25
   5   5  -6    2.99    0.25
   5   5  -6    2.82    0.23
  -5   5   6    3.10    0.21
  -4  -5   6    1.12    0.18
   4  -5  -6    1.23    0.14
  -4  -5   6    0.92    0.18
  -4   5   6    1.17    0.13
   4   5  -6    1.27    0.20
   4   5  -6    1.22    0.19
  -3  -5   6    0.60    0.17
   3  -5  -6    0.45    0.14
  -3  -5   6    0.90    0.17
   3   5  -6    0.62    0.16
  -3   5   6    0.65    0.13
   3   5  -6    0.56    0.16
  -2  -5   6  147.65    3.65
  -2  -5   6  150.84    3.66
   2  -5  -6  153.28    3.64
  -2   5   6  146.81    3.63
   2   5  -6  144.56    3.65
   2   5  -6  148.25    3.65
  -1  -5   6   23.65    0.67
   1  -5  -6   24.36    0.67
  -1   5   6   23.62    0.66
   1   5  -6   24.25    0.68
   1   5  -6   24.86    0.69
   0  -5   6    4.93    0.26
   0  -5  -6    4.75    0.30
   0   5  -6    4.75    0.29
   0   5   6    4.68    0.28
   0   5  -6    4.57    0.27
  -1  -5  -6    7.05    0.34
   1  -5   6    7.10    0.29
  -1   5  -6    6.99    0.31
   1   5   6    7.39    0.34
  -1   5  -6    7.61    0.30
   2  -5   6    5.55    0.26
  -2  -5  -6    5.09    0.33
  -2   5  -6    5.71    0.27
   2   5   6    5.08    0.31
  -2   5  -6    5.92    0.27
   3  -5   6   -0.01    0.12
  -3  -5  -6   -0.06    0.17
   3   5   6   -0.16    0.16
  -3   5  -6   -0.03    0.12
  -3   5  -6   -0.03    0.12
  -4  -5  -6    2.45    0.23
   4  -5   6    2.23    0.20
  -4   5  -6    2.32    0.21
  -4   5  -6    2.23    0.21
   4   5   6    1.91    0.20
  -5  -5  -6    0.49    0.19
   5  -5   6    0.72    0.12
  -5   5  -6    0.63    0.12
  -5   5  -6    0.66    0.13
   6  -5   6    0.87    0.12
  -6   5  -6    0.75    0.11
   6   5   6    0.63    0.19
  -6   5  -6    0.63    0.11
   7  -5   6    4.85    0.21
  -7  -5  -6    5.04    0.38
  -7   5  -6    4.71    0.20
   7   5   6    4.89    0.38
  -7   5  -6    4.69    0.20
  -8  -5  -6   16.23    0.60
   8  -5   6   16.51    0.44
   8   5   6   16.36    0.58
  -9  -5  -6    0.40    0.23
   9   5   6    0.38    0.20
 -10  -5  -6   -0.01    0.22
  10   5   6   -0.15    0.20
 -11  -5  -6    0.18    0.24
  11   5   6    0.95    0.26
  12   5   6    0.66    0.28
 -11  -6   6    0.77    0.27
  11   6  -6    0.26    0.26
 -10  -6   6    1.23    0.27
  10   6  -6    1.67    0.27
  10   6  -6    1.18    0.22
  -9  -6   6   11.83    0.55
   9  -6  -6   11.55    0.33
   9  -6  -6   11.35    0.34
   9   6  -6   11.78    0.54
   9   6  -6   10.57    0.50
   8  -6  -6    0.31    0.10
   8  -6  -6    0.30    0.11
  -8  -6   6    0.42    0.24
   8   6  -6   -0.22    0.19
   8   6  -6    0.25    0.22
  -7  -6   6    8.71    0.46
  -7  -6   6    8.49    0.45
   7  -6  -6    9.12    0.29
   7   6  -6    7.42    0.48
   7   6  -6    8.06    0.44
  -7   6   6    8.29    0.27
  -6  -6   6    0.09    0.17
  -6  -6   6    0.43    0.20
   6   6  -6   -0.08    0.19
   6   6  -6    0.05    0.19
  -5  -6   6    0.23    0.19
  -5  -6   6   -0.07    0.20
   5  -6  -6   -0.06    0.12
   5   6  -6    0.05    0.19
   5   6  -6   -0.01    0.19
  -5   6   6   -0.10    0.12
   4  -6  -6   10.62    0.38
  -4  -6   6   11.08    0.47
  -4   6   6   10.55    0.36
   4   6  -6   10.51    0.45
   4   6  -6   11.90    0.46
  -3  -6   6    8.96    0.40
  -3  -6   6    9.18    0.43
   3  -6  -6    9.13    0.36
  -3   6   6    9.39    0.34
   3   6  -6    9.13    0.41
   3   6  -6    9.31    0.40
  -2  -6   6    8.89    0.40
   2  -6  -6    8.71    0.35
  -2  -6   6    8.52    0.37
   2   6  -6    8.38    0.39
  -2   6   6    8.76    0.34
   2   6  -6    8.56    0.38
   1  -6  -6    0.43    0.16
  -1  -6   6    0.30    0.17
  -1  -6   6    0.11    0.15
   1   6  -6    0.14    0.15
   1   6  -6    0.34    0.16
  -1   6   6    0.17    0.14
   0  -6  -6    4.72    0.32
   0  -6   6    4.79    0.29
   0   6  -6    4.72    0.30
   0   6  -6    5.07    0.30
   0   6   6    4.82    0.30
   1  -6   6    8.06    0.32
  -1  -6  -6    7.49    0.38
  -1   6  -6    7.42    0.33
   1   6   6    7.69    0.35
  -1   6  -6    7.26    0.33
  -2  -6  -6    5.62    0.36
   2  -6   6    5.64    0.28
  -2   6  -6    5.52    0.29
  -2   6  -6    5.78    0.29
   2   6   6    5.48    0.34
  -3  -6  -6    8.77    0.41
   3  -6   6    8.20    0.32
  -3   6  -6    8.63    0.32
  -3   6  -6    8.64    0.33
   3   6   6    8.38    0.41
   4  -6   6    0.60    0.13
  -4  -6  -6    0.39    0.20
  -4   6  -6    0.71    0.13
  -4   6  -6    0.51    0.13
   4   6   6    0.52    0.20
  -5  -6  -6   20.91    0.68
   5  -6   6   20.57    0.57
  -5   6  -6   20.61    0.57
  -5   6  -6   21.40    0.57
   5   6   6   21.04    0.68
   6  -6   6    3.70    0.20
  -6  -6  -6    3.75    0.39
   6   6   6    3.39    0.36
  -6   6  -6    3.78    0.19
  -6   6  -6    3.29    0.20
  -7  -6  -6   10.19    0.49
   7  -6   6   10.23    0.31
   7   6   6    9.70    0.47
  -8  -6  -6    0.02    0.23
   8   6   6    0.01    0.20
  -9  -6  -6    1.45    0.25
   9   6   6    1.95    0.24
 -10  -6  -6    0.72    0.24
  10   6   6    0.26    0.21
  10   6   6    1.13    0.27
 -11  -6  -6    0.06    0.26
  11   6   6    0.26    0.26
  11   7  -6    0.51    0.28
 -10  -7   6    3.61    0.33
  10   7  -6    4.34    0.35
  -9  -7   6    3.79    0.33
   9   7  -6    2.89    0.29
   9   7  -6    2.87    0.30
  -8  -7   6    0.80    0.26
   8  -7  -6    0.79    0.10
   8   7  -6    0.65    0.24
   8   7  -6    0.62    0.24
  -7  -7   6   11.65    0.53
   7  -7  -6   10.70    0.35
   7   7  -6   11.67    0.50
   7   7  -6   11.14    0.51
  -7   7   6   10.74    0.32
  -6  -7   6   10.12    0.46
  -6  -7   6    9.06    0.49
   6   7  -6   10.42    0.47
  -6   7   6    8.74    0.31
   6   7  -6    9.35    0.46
  -5  -7   6    0.10    0.19
   5  -7  -6    0.25    0.13
  -5  -7   6    0.18    0.24
   5   7  -6    0.19    0.20
  -5   7   6    0.25    0.12
   5   7  -6    0.27    0.20
  -4  -7   6   -0.12    0.20
   4  -7  -6    0.08    0.14
  -4  -7   6    0.06    0.19
   4   7  -6   -0.22    0.28
   4   7  -6   -0.08    0.20
  -4   7   6    0.06    0.13
   3  -7  -6    0.68    0.15
  -3  -7   6    0.72    0.18
  -3  -7   6    0.68    0.20
   3   7  -6    0.49    0.19
  -3   7   6    0.70    0.14
  -2  -7   6    6.47    0.40
   2  -7  -6    6.16    0.33
  -2  -7   6    6.51    0.35
   2   7  -6    6.68    0.38
   2   7  -6    6.22    0.36
  -2   7   6    5.84    0.31
   1  -7  -6   14.42    0.49
  -1  -7   6   14.11    0.51
  -1  -7   6   14.17    0.49
   1   7  -6   14.47    0.50
   1   7  -6   13.99    0.50
  -1   7   6   14.62    0.48
   0  -7  -6    0.20    0.18
   0  -7   6    0.27    0.18
   0  -7   6    0.03    0.15
   0   7  -6    0.42    0.17
   0   7   6    0.12    0.16
   0   7  -6    0.20    0.17
  -1  -7  -6   16.83    0.57
   1  -7   6   16.96    0.54
  -1   7  -6   16.83    0.54
   1   7   6   17.72    0.56
  -1   7  -6   16.59    0.53
  -2  -7  -6    2.82    0.24
   2   7   6    2.76    0.23
  -2   7  -6    3.06    0.27
  -2   7  -6    2.81    0.28
  -3  -7  -6    0.44    0.22
   3   7   6    0.22    0.19
  -3   7  -6    0.57    0.15
  -3   7  -6    0.31    0.14
  -4  -7  -6    3.21    0.28
   4  -7   6    2.60    0.28
  -4   7  -6    3.10    0.24
   4   7   6    2.53    0.24
  -4   7  -6    2.99    0.24
  -5  -7  -6    0.70    0.22
   5  -7   6    0.81    0.13
  -5   7  -6    0.88    0.12
   5   7   6    0.73    0.21
  -5   7  -6    0.77    0.14
   6  -7   6    0.73    0.12
  -6  -7  -6    0.76    0.24
  -6   7  -6    0.85    0.11
   6   7   6    0.92    0.23
  -6   7  -6    0.72    0.11
  -7  -7  -6   -0.34    0.22
   7  -7   6   -0.09    0.09
   7   7   6   -0.29    0.20
  -8  -7  -6    1.02    0.24
   8   7   6    1.23    0.22
  -9  -7  -6   -0.04    0.24
   9   7   6    0.19    0.23
 -10  -7  -6    0.31    0.27
  10   7   6    0.30    0.26
 -10  -8   6    1.12    0.35
  10   8  -6    1.00    0.29
  -9  -8   6    0.81    0.29
   9   8  -6    2.07    0.33
   9   8  -6    0.82    0.28
   8  -8  -6    1.56    0.12
  -8  -8   6    1.93    0.30
   8   8  -6    1.93    0.27
   8   8  -6    1.65    0.29
   7  -8  -6   29.85    0.77
  -7  -8   6   29.26    0.92
   7   8  -6   30.27    0.91
  -7   8   6   29.15    0.75
  -7   8   6   29.63    0.75
   7   8  -6   29.59    0.90
  -6  -8   6   22.56    0.78
   6   8  -6   23.13    0.75
  -6   8   6   23.85    0.62
   6   8  -6   22.68    0.75
  -5  -8   6    0.42    0.21
  -5  -8   6    0.59    0.24
   5  -8  -6    0.38    0.13
   5   8  -6    0.75    0.23
   5   8  -6    0.61    0.21
  -5   8   6    0.43    0.13
   4  -8  -6    6.40    0.30
  -4  -8   6    6.81    0.39
  -4  -8   6    5.96    0.55
   4   8  -6    6.25    0.43
  -4   8   6    6.10    0.28
   4   8  -6    6.62    0.41
   3  -8  -6   -0.22    0.15
  -3  -8   6   -0.22    0.17
  -3  -8   6   -0.18    0.22
   3   8  -6    0.09    0.19
  -3   8   6    0.11    0.14
   3   8  -6    0.18    0.20
  -2  -8   6    0.21    0.17
   2  -8  -6   -0.01    0.16
  -2  -8   6    0.07    0.21
  -2   8   6    0.12    0.15
   2   8  -6   -0.16    0.18
   2   8  -6   -0.01    0.18
   1  -8  -6    1.79    0.20
  -1  -8   6    1.82    0.23
  -1  -8   6    1.49    0.20
   1   8  -6    1.26    0.20
   1   8  -6    1.61    0.21
  -1   8   6    1.52    0.18
   0  -8   6    0.99    0.20
   0  -8   6    1.05    0.17
   0  -8  -6    1.07    0.19
   0   8   6    0.80    0.19
   0   8  -6    1.25    0.19
   0   8  -6    1.03    0.19
  -1  -8  -6    2.36    0.23
   1  -8   6    2.52    0.20
  -1   8  -6    2.62    0.29
  -1   8  -6    2.44    0.20
   1   8   6    2.75    0.22
  -2  -8  -6    1.94    0.23
   2  -8   6    1.30    0.17
   2   8   6    1.62    0.22
  -2   8  -6    1.51    0.17
   3  -8   6   95.45    2.37
  -3  -8  -6   97.54    2.43
  -3   8  -6   95.36    2.37
  -3   8  -6   93.71    2.39
   4  -8   6    5.85    0.29
  -4  -8  -6    5.72    0.44
  -4   8  -6    6.00    0.28
  -4   8  -6    5.59    0.28
   4   8   6    5.08    0.41
   5  -8   6    0.60    0.13
  -5  -8  -6    1.07    0.25
  -5   8  -6    0.60    0.13
   5   8   6    0.76    0.23
  -6  -8  -6    0.70    0.27
   6  -8   6    1.02    0.13
  -6   8  -6    1.42    0.11
   6   8   6    1.33    0.25
  -6   8  -6    1.28    0.12
  -7  -8  -6   -0.04    0.27
   7   8   6    0.24    0.22
  -8  -8  -6    0.27    0.26
   8   8   6    1.21    0.26
  -9  -8  -6    0.31    0.29
   9   8   6    0.22    0.27
  10   8   6    0.67    0.31
  -9  -9   6    0.06    0.29
   9   9  -6    0.59    0.27
   8  -9  -6   11.39    0.34
  -8  -9   6   10.79    0.59
   8   9  -6   11.64    0.58
   8   9  -6   10.24    0.53
   7  -9  -6   29.66    0.78
  -7  -9   6   29.45    0.95
   7   9  -6   29.74    0.90
   7   9  -6   28.89    0.91
  -6  -9   6    2.11    0.31
  -6   9   6    2.01    0.17
  -6   9   6    2.43    0.20
   6   9  -6    2.12    0.29
   6   9  -6    2.25    0.27
   5  -9  -6    3.57    0.25
  -5  -9   6    4.37    0.47
  -5   9   6    3.39    0.25
   5   9  -6    3.51    0.31
   5   9  -6    3.46    0.29
  -4  -9   6    1.34    0.27
   4  -9  -6    1.08    0.16
  -4   9   6    1.19    0.15
   4   9  -6    1.39    0.22
   4   9  -6    1.26    0.26
  -3  -9   6    2.40    0.28
  -3  -9   6    2.47    0.23
   3  -9  -6    2.95    0.29
  -3   9   6    3.25    0.27
   3   9  -6    2.27    0.25
   3   9  -6    2.41    0.24
   2  -9  -6    0.93    0.19
  -2  -9   6    1.27    0.19
  -2  -9   6    1.15    0.23
   2   9  -6    0.97    0.21
   2   9  -6    1.03    0.21
  -2   9   6    0.89    0.17
  -1  -9   6    5.13    0.39
  -1  -9   6    4.72    0.33
   1  -9  -6    4.58    0.36
   1   9  -6    4.66    0.36
  -1   9   6    5.26    0.33
   1   9  -6    4.33    0.36
   0  -9  -6    1.84    0.22
   0  -9   6    1.71    0.22
   0  -9   6    1.65    0.20
   0   9  -6    1.86    0.21
   0   9   6    1.66    0.20
   0   9  -6    1.95    0.21
   1  -9   6    0.38    0.17
  -1  -9  -6    0.60    0.22
  -1   9  -6    0.70    0.17
  -1   9  -6    0.32    0.18
   1   9   6    0.63    0.19
  -2  -9  -6   46.50    1.29
   2  -9   6   45.62    1.23
   2   9   6   48.68    1.29
  -2   9  -6   49.10    1.24
  -2   9  -6   47.67    1.24
   3  -9   6    2.79    0.28
  -3   9  -6    2.66    0.27
   3   9   6    2.54    0.27
  -3   9  -6    2.93    0.27
  -4  -9  -6   -0.06    0.24
   4  -9   6    0.04    0.14
   4   9   6    0.09    0.23
  -4   9  -6    0.02    0.14
  -4   9  -6    0.20    0.14
  -5  -9  -6    0.37    0.25
  -5   9  -6    0.55    0.14
   5   9   6    0.42    0.24
  -6  -9  -6    0.47    0.27
  -6   9  -6    0.15    0.10
   6   9   6    0.03    0.23
  -6   9  -6    0.04    0.11
  -7  -9  -6    1.91    0.28
   7   9   6    1.25    0.24
   7   9   6    1.52    0.28
  -8  -9  -6    4.59    0.50
   8   9   6    4.41    0.49
   8   9   6    5.77    0.56
  -9  -9  -6    2.35    0.38
   9   9   6    2.01    0.32
  -8 -10   6   -0.23    0.30
   8  10  -6   -0.18    0.27
   7 -10  -6    1.10    0.24
  -7 -10   6    2.37    0.33
   7  10  -6    1.36    0.26
   7  10  -6    1.97    0.30
  -6 -10   6    0.41    0.29
  -6  10   6    0.89    0.13
  -6  10   6    0.97    0.12
   6  10  -6    1.06    0.26
   6  10  -6    0.81    0.25
   5 -10  -6    1.74    0.16
  -5 -10   6    1.77    0.31
   5  10  -6    1.63    0.27
  -5  10   6    1.63    0.18
   5  10  -6    1.56    0.27
  -5  10   6    1.76    0.17
   4 -10  -6    3.03    0.27
  -4 -10   6    3.18    0.31
   4  10  -6    2.99    0.29
  -4  10   6    3.06    0.28
   4  10  -6    2.61    0.27
  -4  10   6    3.03    0.25
   3 -10  -6   11.08    0.41
  -3 -10   6   10.29    0.55
   3  10  -6    9.28    0.51
  -3  10   6   10.41    0.40
   3  10  -6    9.72    0.49
   2 -10  -6    0.79    0.19
  -2 -10   6    0.58    0.25
  -2  10   6    1.23    0.18
   2  10  -6    0.49    0.22
   2  10  -6    0.89    0.30
  -1 -10   6    2.80    0.28
   1 -10  -6    2.65    0.24
   1  10  -6    2.61    0.24
   1  10  -6    2.56    0.26
  -1  10   6    2.95    0.24
   0 -10  -6    2.82    0.25
   0 -10   6    2.88    0.26
   0  10   6    3.01    0.24
   0  10  -6    2.89    0.24
   0  10  -6    2.93    0.24
   1 -10   6   -0.15    0.19
  -1 -10  -6    0.06    0.22
  -1  10  -6   -0.02    0.18
  -1  10  -6    0.29    0.18
   1  10   6    0.18    0.20
  -2 -10  -6    0.50    0.30
  -2  10  -6    0.52    0.17
  -2  10  -6    0.53    0.18
   2  10   6    0.65    0.23
  -3 -10  -6    0.19    0.26
  -3  10  -6    0.28    0.16
  -3  10  -6    0.13    0.16
   3  10   6    0.53    0.23
  -4 -10  -6    3.46    0.33
  -4  10  -6    2.72    0.27
   4  10   6    3.97    0.31
  -4  10  -6    3.57    0.27
  -5 -10  -6    0.71    0.29
   5  10   6    0.71    0.26
  -5  10  -6    0.83    0.15
   5  10   6    1.11    0.27
  -5  10  -6    0.58    0.16
  -6 -10  -6    1.52    0.30
   6  10   6    1.90    0.28
  -6  10  -6    1.59    0.18
   6  10   6    1.68    0.30
  -7 -10  -6    0.92    0.31
   7  10   6    0.87    0.28
   7  10   6    1.61    0.26
  -6 -11   6    1.46    0.34
   6  11  -6    1.13    0.26
   6  11  -6    1.65    0.33
  -6  11   6    1.96    0.21
  -5 -11   6    1.07    0.32
   5 -11  -6    0.19    0.16
   5  11  -6    1.43    0.25
  -5  11   6    0.63    0.15
  -5  11   6    0.55    0.22
   5  11  -6    0.98    0.27
  -4 -11   6    0.78    0.30
   4 -11  -6    0.35    0.17
  -4  11   6    0.87    0.17
  -4  11   6    0.55    0.19
   4  11  -6    0.32    0.23
   4  11  -6    0.45    0.25
  -3 -11   6    1.15    0.29
   3 -11  -6    1.19    0.20
  -3  11   6    0.96    0.18
  -3  11   6    1.01    0.21
   3  11  -6    1.08    0.27
   3  11  -6    1.04    0.26
   2 -11  -6    6.07    0.40
  -2 -11   6    5.87    0.51
  -2  11   6    6.16    0.37
   2  11  -6    5.82    0.43
  -2  11   6    6.45    0.37
   2  11  -6    5.28    0.44
  -1 -11   6    0.13    0.24
   1 -11  -6    0.51    0.22
  -1  11   6    0.49    0.18
   1  11  -6    0.84    0.22
  -1  11   6    0.65    0.19
   1  11  -6    0.41    0.23
   0 -11  -6    1.53    0.26
   0 -11   6    1.27    0.24
   0  11  -6    1.51    0.23
   0  11   6    1.38    0.22
   0  11  -6    1.14    0.22
   0  11   6    1.50    0.23
  -1 -11  -6    5.95    0.48
   1  11   6    4.77    0.42
   1  11   6    5.42    0.41
  -1  11  -6    5.13    0.37
  -1  11  -6    5.67    0.37
  -2 -11  -6   -0.13    0.26
  -2  11  -6    0.45    0.19
   2  11   6    0.24    0.23
  -2  11  -6    0.19    0.19
   2  11   6    0.26    0.23
  -3 -11  -6    3.70    0.35
  -3  11  -6    3.99    0.32
  -3  11  -6    3.22    0.36
   3  11   6    2.95    0.29
   3  11   6    3.84    0.41
  -4 -11  -6    0.75    0.28
   4  11   6    1.01    0.25
  -4  11  -6    0.65    0.20
   4  11   6    1.18    0.25
  -4  11  -6    0.47    0.16
  -5 -11  -6   -0.11    0.27
  -5  11  -6    0.22    0.18
   5  11   6   -0.43    0.21
   5  11   6   -0.04    0.25
  -5  11  -6    0.17    0.14
  -6 -11  -6    2.08    0.33
   6  11   6    2.12    0.27
   6  11   6    1.83    0.33
  -4 -12   6    0.00    0.31
   4  12  -6   -0.03    0.21
  -4  12   6   -0.10    0.17
  -3 -12   6   -0.01    0.29
  -3  12   6    0.07    0.18
   3  12  -6   -0.07    0.22
   2 -12  -6    5.94    0.43
  -2 -12   6    5.83    0.53
  -2  12   6    6.40    0.46
   2  12  -6    4.81    0.46
   2  12  -6    6.13    0.46
  -2  12   6    6.28    0.39
  -1 -12   6   12.48    0.63
   1 -12  -6   12.49    0.56
  -1  12   6   12.41    0.51
   1  12  -6   12.60    0.55
  -1  12   6   11.72    0.56
   1  12  -6   11.63    0.58
   0 -12   6    0.50    0.25
   0 -12  -6    0.14    0.24
   0  12   6    1.36    0.29
   0  12  -6    0.90    0.29
   0  12   6    0.48    0.23
   0  12  -6    0.62    0.22
  -1 -12  -6   -0.21    0.26
   1  12   6   -0.43    0.22
  -1  12  -6   -0.09    0.20
  -1  12  -6   -0.15    0.26
   1  12   6    0.22    0.25
  -2 -12  -6   -0.06    0.26
   2  12   6    0.18    0.25
  -2  12  -6    0.50    0.38
   2  12   6   -0.32    0.22
  -2  12  -6   -0.19    0.19
  -3 -12  -6    0.14    0.28
  -3  12  -6    0.52    0.19
   3  12   6    0.25    0.24
  13   0  -7   -0.55    0.20
  12   0  -7    0.11    0.16
  12   0  -7    0.02    0.16
  11   0  -7   -0.05    0.16
  11   0  -7   -0.12    0.17
 -10   0   7    0.06    0.15
  10   0  -7    0.31    0.16
  10   0  -7   -0.17    0.17
   9   0  -7   -0.06    0.16
   9   0  -7   -0.18    0.16
  -9   0   7    0.01    0.13
  -8   0   7   -0.03    0.14
   8   0  -7   -0.12    0.15
   8   0  -7   -0.15    0.16
   7   0  -7   -0.27    0.15
  -7   0   7   -0.08    0.14
  -6   0   7   -0.13    0.13
   6   0  -7    0.26    0.15
   6   0  -7   -0.15    0.15
   5   0  -7   -0.14    0.13
  -5   0   7    0.05    0.13
   5   0  -7   -0.01    0.14
  -4   0   7   -0.03    0.12
   4   0  -7   -0.05    0.13
  -3   0   7   -0.03    0.12
   3   0  -7   -0.17    0.13
   2   0  -7   -0.13    0.12
  -2   0   7   -0.02    0.12
   1   0  -7   -0.05    0.14
  -1   0   7   -0.03    0.13
   0   0   7   -0.01    0.13
   0   0  -7   -0.14    0.14
  -1   0  -7    0.02    0.13
   1   0   7   -0.09    0.12
  -2   0  -7    0.03    0.13
   2   0   7   -0.15    0.12
   3   0   7   -0.10    0.13
  -3   0  -7   -0.10    0.13
   4   0   7    0.11    0.12
  -4   0  -7    0.06    0.14
   5   0   7    0.01    0.12
  -5   0  -7    0.06    0.14
  -6   0  -7    0.00    0.15
   6   0   7    0.02    0.14
  -7   0  -7   -0.19    0.15
   7   0   7   -0.08    0.28
  -8   0  -7    0.12    0.17
   8   0   7   -0.17    0.15
   9   0   7    0.09    0.15
  -9   0  -7    0.08    0.17
  10   0   7    0.06    0.16
 -10   0  -7    0.02    0.17
 -11   0  -7    0.11    0.18
  11   0   7   -0.03    0.17
 -12   0  -7   -0.25    0.18
  12   0   7    0.19    0.16
  13  -1  -7    3.06    0.29
  12  -1  -7    3.06    0.29
  12  -1  -7    4.08    0.28
  12   1  -7    3.34    0.27
  12   1  -7    3.16    0.33
  11  -1  -7    3.06    0.28
  11  -1  -7    2.91    0.26
  11   1  -7    2.11    0.22
  11   1  -7    2.62    0.22
  10  -1  -7    0.24    0.16
 -10  -1   7    0.32    0.15
  10  -1  -7    0.09    0.14
  10   1  -7   -0.18    0.17
 -10   1   7   -0.10    0.13
  10   1  -7   -0.11    0.17
  -9  -1   7    0.14    0.16
   9  -1  -7    0.17    0.15
   9  -1  -7    0.44    0.17
   9   1  -7    0.21    0.18
   9   1  -7   -0.03    0.18
  -9   1   7    0.40    0.14
  -8  -1   7   12.57    0.44
   8  -1  -7   12.40    0.44
   8  -1  -7   12.28    0.43
   8   1  -7   12.51    0.45
   8   1  -7   12.52    0.46
  -8   1   7   11.91    0.41
   7  -1  -7   15.24    0.50
  -7  -1   7   16.09    0.51
   7  -1  -7   16.33    0.49
   7   1  -7   15.56    0.52
  -7   1   7   15.66    0.48
   7   1  -7   15.72    0.52
   6  -1  -7   17.08    0.52
  -6  -1   7   17.02    0.53
   6  -1  -7   17.34    0.53
   6   1  -7   18.03    0.55
   6   1  -7   18.25    0.54
  -6   1   7   17.66    0.51
   5  -1  -7    0.52    0.14
  -5  -1   7    0.75    0.14
   5   1  -7    0.33    0.14
  -5   1   7    0.51    0.12
   5   1  -7    0.38    0.15
  -4  -1   7    3.24    0.25
   4  -1  -7    3.73    0.24
   4   1  -7    3.38    0.26
  -4   1   7    3.55    0.23
   4   1  -7    2.96    0.26
   3  -1  -7   60.32    1.47
  -3  -1   7   58.67    1.47
   3   1  -7   58.76    1.48
  -3   1   7   57.92    1.47
   3   1  -7   57.04    1.48
   2  -1  -7    2.92    0.25
  -2  -1   7    2.67    0.24
   2   1  -7    2.50    0.24
  -2   1   7    2.82    0.22
  -1  -1   7    6.13    0.29
   1  -1  -7    6.57    0.29
  -1   1   7    6.44    0.28
   1   1  -7    6.76    0.29
   0  -1   7    1.19    0.14
   0  -1  -7    1.06    0.14
   0   1  -7    0.81    0.12
   0   1   7    1.02    0.14
   1  -1   7    7.61    0.31
  -1  -1  -7    8.19    0.33
   1   1   7    7.83    0.32
  -1   1  -7    8.34    0.31
   2  -1   7   19.78    0.56
  -2  -1  -7   19.42    0.57
  -2   1  -7   20.33    0.56
   2   1   7   20.13    0.57
   3  -1   7   93.38    2.31
  -3  -1  -7   91.78    2.32
  -3   1  -7   94.85    2.31
   3   1   7   94.83    2.32
   4  -1   7    7.82    0.30
  -4  -1  -7    7.31    0.32
   4   1   7    7.11    0.32
  -4   1  -7    7.26    0.30
   5  -1   7    2.50    0.23
  -5  -1  -7    2.48    0.27
  -5   1  -7    2.52    0.23
   5   1   7    2.63    0.25
   6  -1   7   23.62    0.67
  -6  -1  -7   24.53    0.70
  -6   1  -7   24.79    0.68
   6   1   7   25.03    0.69
  -7  -1  -7    0.38    0.17
   7  -1   7    0.05    0.14
   7   1   7    0.29    0.16
  -7   1  -7    0.13    0.15
  -8  -1  -7    8.68    0.40
   8  -1   7    9.41    0.36
   8   1   7    9.30    0.39
  -8   1  -7    8.76    0.37
   9  -1   7    0.39    0.15
  -9  -1  -7    0.28    0.18
   9   1   7    0.38    0.17
  -9   1  -7    0.17    0.19
  10  -1   7   -0.09    0.15
 -10  -1  -7   -0.02    0.18
 -10   1  -7    0.11    0.16
  10   1   7   -0.09    0.15
 -11  -1  -7    0.44    0.20
  11  -1   7    0.22    0.14
 -11   1  -7    0.11    0.17
  11   1   7   -0.12    0.18
  12  -1   7    2.34    0.18
 -12  -1  -7    2.02    0.24
  12   1   7    1.71    0.21
 -12   1  -7    2.02    0.20
  13  -2  -7    0.75    0.16
  13   2  -7   -0.33    0.42
  12  -2  -7    0.00    0.15
  12  -2  -7    0.38    0.13
  12   2  -7    0.23    0.21
  12   2  -7    0.70    0.25
  11  -2  -7    4.82    0.29
  11  -2  -7    4.70    0.26
  11   2  -7    5.29    0.38
  11   2  -7    5.13    0.35
 -10  -2   7    1.07    0.18
  10  -2  -7    0.74    0.14
  10  -2  -7    0.70    0.16
  10   2  -7    0.54    0.20
 -10   2   7    0.69    0.13
  10   2  -7    0.65    0.20
   9  -2  -7   11.95    0.40
  -9  -2   7   11.83    0.45
   9  -2  -7   11.53    0.41
  -9   2   7   11.32    0.38
   9   2  -7   11.13    0.46
   9   2  -7   11.71    0.46
   8  -2  -7   37.47    0.99
  -8  -2   7   38.88    1.03
   8  -2  -7   38.15    1.00
   8   2  -7   37.98    1.03
  -8   2   7   37.63    0.98
   8   2  -7   37.63    1.03
   7  -2  -7    8.90    0.35
   7  -2  -7    8.52    0.34
  -7  -2   7    9.27    0.38
   7   2  -7    8.79    0.39
   7   2  -7    8.32    0.39
  -7   2   7    8.52    0.33
   6  -2  -7    6.79    0.30
  -6  -2   7    7.15    0.35
   6  -2  -7    7.46    0.32
  -6   2   7    7.31    0.30
   6   2  -7    7.20    0.36
   6   2  -7    7.60    0.36
   5  -2  -7    0.63    0.13
  -5  -2   7    0.56    0.14
   5   2  -7    0.57    0.17
  -5   2   7    0.67    0.13
   5   2  -7    0.56    0.16
   4  -2  -7    0.44    0.13
  -4  -2   7    0.52    0.15
  -4   2   7    0.52    0.12
   4   2  -7    0.31    0.14
   4   2  -7    0.52    0.15
   3  -2  -7    0.04    0.12
  -3  -2   7    0.06    0.13
  -3   2   7   -0.02    0.11
   3   2  -7   -0.01    0.13
   3   2  -7   -0.14    0.14
   2  -2  -7   53.47    1.34
  -2  -2   7   53.59    1.35
   2   2  -7   52.67    1.35
  -2   2   7   53.87    1.34
   2   2  -7   52.19    1.35
   1  -2  -7   15.21    0.47
  -1  -2   7   15.55    0.46
  -1   2   7   15.31    0.46
   1   2  -7   15.30    0.46
   0  -2   7    2.90    0.23
   0  -2  -7    3.10    0.25
   0   2  -7    3.11    0.24
   0   2   7    2.80    0.24
   1  -2   7   23.19    0.64
  -1  -2  -7   23.01    0.65
   1   2   7   23.84    0.65
  -1   2  -7   23.81    0.64
   2  -2   7   21.61    0.63
  -2  -2  -7   24.03    0.66
  -2   2  -7   23.25    0.63
   2   2   7   24.37    0.65
   3  -2   7   26.67    0.71
  -3  -2  -7   26.44    0.74
   3   2   7   27.30    0.74
  -3   2  -7   26.70    0.71
  -4  -2  -7   15.68    0.51
   4  -2   7   16.57    0.47
  -4   2  -7   16.64    0.48
   4   2   7   16.13    0.50
  -5  -2  -7   19.26    0.58
   5  -2   7   18.93    0.54
   5   2   7   19.21    0.57
  -5   2  -7   18.62    0.54
  -6  -2  -7    0.18    0.17
   6  -2   7    0.25    0.13
   6   2   7    0.50    0.30
  -6   2  -7    0.19    0.13
   7  -2   7    2.48    0.24
  -7  -2  -7    3.02    0.31
  -7   2  -7    2.74    0.24
   7   2   7    3.17    0.29
  -8  -2  -7    5.47    0.36
   8  -2   7    5.56    0.28
   8   2   7    5.50    0.35
  -8   2  -7    5.18    0.29
  -9  -2  -7   13.57    0.52
   9  -2   7   14.11    0.44
  -9   2  -7   13.69    0.44
   9   2   7   14.08    0.51
  10  -2   7    2.25    0.23
 -10  -2  -7    2.29    0.24
 -10   2  -7    2.34    0.26
  10   2   7    2.04    0.22
 -11  -2  -7    1.04    0.22
  11  -2   7    0.51    0.15
  11   2   7    0.77    0.18
 -11   2  -7    1.05    0.16
 -12  -2  -7    1.24    0.23
  12  -2   7    1.28    0.16
  12   2   7    0.98    0.26
 -12   2  -7    1.20    0.16
  12  -3  -7    3.77    0.27
  12   3  -7    4.39    0.41
  11  -3  -7    8.17    0.33
  11   3  -7    7.20    0.44
  11   3  -7    8.43    0.45
 -10  -3   7    5.15    0.37
  10  -3  -7    5.26    0.29
  10  -3  -7    4.68    0.25
  10   3  -7    5.35    0.40
  10   3  -7    4.92    0.35
   9  -3  -7    8.18    0.34
  -9  -3   7    8.55    0.40
   9  -3  -7    8.33    0.31
   9   3  -7    8.20    0.41
  -9   3   7    8.21    0.31
   9   3  -7    8.66    0.42
   8  -3  -7    0.17    0.15
   8  -3  -7    0.35    0.13
  -8  -3   7    0.01    0.18
  -8   3   7    0.15    0.12
   8   3  -7    0.12    0.18
   8   3  -7    0.16    0.19
   7  -3  -7    4.77    0.26
  -7  -3   7    4.46    0.33
   7  -3  -7    4.82    0.28
   7   3  -7    4.80    0.35
  -7   3   7    4.58    0.24
   7   3  -7    4.67    0.35
  -6  -3   7    9.72    0.39
   6  -3  -7    9.71    0.34
  -6   3   7    9.04    0.33
   6   3  -7    9.25    0.42
   6   3  -7    9.25    0.41
   5  -3  -7    2.07    0.23
  -5  -3   7    2.43    0.19
   5   3  -7    1.67    0.19
   5   3  -7    2.12    0.20
  -5   3   7    2.15    0.21
  -4  -3   7   24.14    0.67
   4  -3  -7   23.05    0.64
  -4   3   7   23.51    0.63
   4   3  -7   23.01    0.67
   4   3  -7   23.50    0.68
   3  -3  -7    8.50    0.32
  -3  -3   7    8.22    0.35
   3   3  -7    8.13    0.35
   3   3  -7    8.68    0.36
  -3   3   7    8.52    0.31
   2  -3  -7   56.06    1.44
  -2  -3   7   58.33    1.45
   2   3  -7   56.33    1.45
  -2   3   7   57.80    1.44
   2   3  -7   57.65    1.46
   1  -3  -7   29.12    0.76
  -1  -3   7   27.79    0.76
  -1   3   7   28.10    0.76
   1   3  -7   28.01    0.77
   1   3  -7   28.14    0.76
   0  -3   7   20.64    0.58
   0  -3  -7   21.57    0.60
   0   3   7   20.07    0.59
   0   3  -7   20.41    0.58
   0   3  -7   20.99    0.59
   1  -3   7    1.36    0.14
  -1  -3  -7    1.15    0.15
   1   3   7    1.27    0.16
  -1   3  -7    1.21    0.14
  -2  -3  -7   25.50    0.70
   2  -3   7   24.56    0.67
  -2   3  -7   25.30    0.68
   2   3   7   24.91    0.70
  -3  -3  -7    7.24    0.35
   3  -3   7    7.28    0.29
   3   3   7    7.76    0.34
  -3   3  -7    8.58    0.30
  -4  -3  -7    1.55    0.19
   4  -3   7    1.46    0.13
   4   3   7    1.41    0.17
  -4   3  -7    1.48    0.14
  -5  -3  -7    9.28    0.41
   5  -3   7    9.48    0.33
   5   3   7    9.68    0.40
  -5   3  -7    9.40    0.33
  -6  -3  -7    3.81    0.35
   6  -3   7    3.71    0.23
  -6   3  -7    4.17    0.24
   6   3   7    3.59    0.31
   7  -3   7   -0.04    0.12
  -7  -3  -7    0.01    0.18
   7   3   7    0.10    0.17
  -7   3  -7    0.09    0.13
   8  -3   7   12.01    0.46
  -8  -3  -7   13.80    0.52
   8   3   7   13.89    0.49
  -8   3  -7   13.95    0.42
  -9  -3  -7    0.30    0.21
   9  -3   7    0.54    0.12
  -9   3  -7    0.48    0.13
   9   3   7    0.26    0.17
 -10  -3  -7    1.52    0.24
  10  -3   7    1.47    0.14
  10   3   7    1.55    0.20
 -10   3  -7    1.70    0.15
  11  -3   7    5.31    0.27
 -11  -3  -7    5.40    0.42
  11   3   7    5.91    0.41
 -12  -3  -7   -0.05    0.22
  12  -3   7    0.09    0.13
  12   3   7   -0.10    0.22
  12  -4  -7    1.27    0.16
  12   4  -7    1.68    0.27
  11  -4  -7    0.04    0.12
  11  -4  -7    0.28    0.14
  11   4  -7    0.12    0.20
  11   4  -7   -0.02    0.31
  10  -4  -7    1.17    0.23
  10  -4  -7    1.60    0.16
 -10   4   7    1.38    0.12
  10   4  -7    2.11    0.26
  10   4  -7    1.31    0.21
   9  -4  -7    3.77    0.24
  -9  -4   7    3.13    0.35
  -9   4   7    2.84    0.20
   9   4  -7    3.18    0.27
   9   4  -7    2.79    0.25
  -8  -4   7    8.77    0.42
   8  -4  -7    8.85    0.33
   8  -4  -7    8.71    0.32
  -8   4   7    8.50    0.31
   8   4  -7    8.59    0.44
   8   4  -7    8.56    0.43
  -7  -4   7   42.32    1.15
  -7  -4   7   42.17    1.13
   7  -4  -7   40.90    1.08
   7   4  -7   42.41    1.14
  -7   4   7   42.23    1.07
   7   4  -7   42.36    1.14
   6  -4  -7    8.39    0.32
  -6  -4   7    8.54    0.40
   6   4  -7    8.80    0.42
  -6   4   7    8.35    0.30
   6   4  -7    8.31    0.42
   5  -4  -7    0.34    0.14
  -5  -4   7    0.40    0.18
   5   4  -7    0.39    0.18
  -5   4   7    0.25    0.12
   5   4  -7    0.23    0.19
  -4  -4   7    0.54    0.17
   4  -4  -7    0.42    0.14
   4   4  -7    0.29    0.17
  -4   4   7    0.45    0.13
   4   4  -7    0.61    0.18
   3  -4  -7   18.49    0.55
  -3  -4   7   18.95    0.57
   3   4  -7   19.32    0.59
  -3   4   7   19.18    0.54
   3   4  -7   18.78    0.58
   2  -4  -7    0.39    0.14
  -2  -4   7    0.26    0.13
   2   4  -7    0.40    0.16
  -2   4   7    0.35    0.13
   2   4  -7    0.35    0.16
   1  -4  -7    3.62    0.27
  -1  -4   7    3.59    0.26
   1   4  -7    3.39    0.27
  -1   4   7    3.44    0.25
   1   4  -7    3.03    0.27
   0  -4   7   15.17    0.46
   0  -4  -7   14.94    0.48
   0   4  -7   14.84    0.47
   0   4  -7   14.74    0.46
   0   4   7   15.30    0.47
  -1  -4  -7    1.10    0.16
   1  -4   7    1.02    0.14
  -1   4  -7    1.15    0.15
   1   4   7    1.06    0.15
  -1   4  -7    1.17    0.15
  -2  -4  -7    2.63    0.29
   2  -4   7    2.36    0.21
   2   4   7    2.50    0.27
  -2   4  -7    2.46    0.23
  -2   4  -7    2.48    0.23
  -3  -4  -7   39.96    1.06
   3  -4   7   40.05    1.02
   3   4   7   39.92    1.06
  -3   4  -7   39.59    1.03
  -3   4  -7   40.03    1.02
  -4  -4  -7    2.11    0.22
   4  -4   7    2.19    0.22
  -4   4  -7    2.09    0.16
  -4   4  -7    2.00    0.15
   4   4   7    2.72    0.29
  -5  -4  -7    0.25    0.19
   5  -4   7    0.03    0.11
  -5   4  -7    0.04    0.13
  -6  -4  -7    0.88    0.23
   6  -4   7    1.11    0.13
  -6   4  -7    1.28    0.14
   6   4   7    1.05    0.18
   7  -4   7    4.04    0.23
  -7  -4  -7    3.35    0.36
  -7   4  -7    3.93    0.23
   7   4   7    4.23    0.34
   8  -4   7    1.03    0.20
  -8  -4  -7    1.11    0.22
  -8   4  -7    1.41    0.13
   8   4   7    1.34    0.20
  -9  -4  -7    1.08    0.23
   9  -4   7    0.85    0.12
  -9   4  -7    0.88    0.12
   9   4   7    0.72    0.19
 -10  -4  -7    4.41    0.42
  10  -4   7    4.58    0.23
  10   4   7    4.06    0.37
  11  -4   7    0.24    0.10
 -11  -4  -7    0.10    0.23
  11   4   7    0.17    0.24
 -12  -4  -7   -0.05    0.25
  12   4   7    0.23    0.31
  12   5  -7    0.12    0.27
  11  -5  -7    1.70    0.18
  11  -5  -7    1.85    0.14
  11   5  -7    1.49    0.28
  10  -5  -7    0.12    0.13
 -10  -5   7    0.28    0.24
  10  -5  -7    0.04    0.12
  10   5  -7   -0.37    0.20
  10   5  -7    0.40    0.25
   9  -5  -7   -0.07    0.13
  -9  -5   7    0.09    0.23
  -9  -5   7    0.28    0.20
   9  -5  -7    0.15    0.11
   9   5  -7    0.04    0.24
  -9   5   7    0.05    0.09
   9   5  -7   -0.04    0.19
  -8  -5   7    0.47    0.19
  -8  -5   7    0.13    0.21
   8  -5  -7    0.42    0.13
   8   5  -7    0.18    0.23
   8   5  -7    0.29    0.19
  -8   5   7    0.40    0.11
   7  -5  -7    3.33    0.23
  -7  -5   7    3.42    0.30
  -7  -5   7    3.68    0.39
   7   5  -7    3.39    0.27
  -7   5   7    3.60    0.22
   7   5  -7    3.73    0.37
  -6  -5   7    0.53    0.22
  -6  -5   7    0.70    0.23
   6  -5  -7    0.66    0.13
  -6   5   7    0.71    0.12
   6   5  -7    0.57    0.20
   6   5  -7    0.56    0.20
   5  -5  -7    0.12    0.13
  -5  -5   7    0.02    0.19
  -5  -5   7    0.06    0.18
  -5   5   7    0.00    0.12
   5   5  -7    0.13    0.19
   5   5  -7    0.11    0.18
  -4  -5   7    0.26    0.18
   4  -5  -7    0.14    0.14
  -4  -5   7    0.59    0.18
   4   5  -7   -0.12    0.17
  -4   5   7    0.31    0.13
   4   5  -7    0.26    0.18
  -3  -5   7    1.12    0.19
   3  -5  -7    1.05    0.16
   3   5  -7    1.39    0.20
   3   5  -7    0.97    0.18
  -3   5   7    1.15    0.15
  -2  -5   7   46.10    1.21
   2  -5  -7   47.61    1.20
   2   5  -7   46.43    1.22
   2   5  -7   46.44    1.22
  -2   5   7   46.42    1.19
  -1  -5   7    9.58    0.36
   1  -5  -7    9.24    0.37
  -1   5   7    9.50    0.36
   1   5  -7    9.24    0.39
   1   5  -7    8.91    0.37
   0  -5   7   -0.01    0.14
   0  -5  -7    0.18    0.15
   0   5  -7    0.01    0.15
   0   5   7    0.09    0.14
   0   5  -7    0.05    0.14
   1  -5   7    2.69    0.25
  -1  -5  -7    2.88    0.22
  -1   5  -7    3.34    0.26
   1   5   7    2.90    0.28
  -1   5  -7    3.18    0.27
  -2  -5  -7    1.55    0.19
   2  -5   7    1.75    0.16
  -2   5  -7    1.97    0.16
   2   5   7    2.06    0.20
  -2   5  -7    1.83    0.16
   3  -5   7    0.78    0.14
  -3  -5  -7    0.64    0.19
  -3   5  -7    0.63    0.14
   3   5   7    0.52    0.16
  -3   5  -7    0.61    0.14
  -4  -5  -7    0.06    0.19
   4  -5   7    0.13    0.13
   4   5   7    0.05    0.19
  -4   5  -7   -0.03    0.13
  -4   5  -7    0.12    0.13
  -5  -5  -7    0.33    0.21
   5  -5   7    0.49    0.13
  -5   5  -7    0.45    0.13
  -5   5  -7    0.25    0.13
   5   5   7    0.36    0.19
   6  -5   7    0.20    0.12
  -6  -5  -7    0.29    0.20
  -6   5  -7    0.14    0.12
   6   5   7    0.09    0.19
  -6   5  -7    0.06    0.12
   7  -5   7    3.24    0.20
  -7  -5  -7    3.52    0.38
   7   5   7    3.43    0.36
  -7   5  -7    3.12    0.20
  -7   5  -7    3.17    0.20
  -8  -5  -7    9.52    0.48
   8  -5   7    8.06    0.40
  -8   5  -7    9.16    0.29
  -8   5  -7   10.00    0.29
   8   5   7    9.10    0.45
   9  -5   7    0.14    0.11
  -9  -5  -7    0.07    0.23
   9   5   7    0.21    0.19
  10  -5   7    0.34    0.10
 -10  -5  -7    0.47    0.25
  10   5   7    0.08    0.21
 -11  -5  -7    0.34    0.24
 -11  -6   7    1.78    0.29
  11   6  -7    1.52    0.28
  10  -6  -7    0.61    0.12
 -10  -6   7    0.78    0.26
  10  -6  -7    1.02    0.12
  10   6  -7    0.67    0.25
  10   6  -7    1.18    0.27
   9  -6  -7    2.05    0.19
   9  -6  -7    2.52    0.22
  -9  -6   7    1.89    0.27
   9   6  -7    1.92    0.28
   9   6  -7    2.17    0.26
   8  -6  -7    0.00    0.12
   8  -6  -7    0.19    0.11
  -8  -6   7   -0.25    0.24
  -8  -6   7    0.12    0.23
  -8   6   7   -0.11    0.09
   8   6  -7   -0.10    0.23
   8   6  -7    0.24    0.20
  -7  -6   7   32.21    0.92
  -7  -6   7   32.34    0.94
   7   6  -7   32.43    0.93
   7   6  -7   31.55    0.93
  -7   6   7   30.35    0.82
   6  -6  -7   14.95    0.45
  -6  -6   7   14.59    0.57
  -6  -6   7   15.01    0.54
   6   6  -7   14.73    0.56
   6   6  -7   14.34    0.57
  -6   6   7   14.81    0.44
   5  -6  -7    1.06    0.15
  -5  -6   7    0.63    0.20
  -5  -6   7    0.84    0.25
   5   6  -7    0.55    0.23
  -5   6   7    0.83    0.13
   5   6  -7    0.49    0.21
  -4  -6   7    4.45    0.34
   4  -6  -7    4.45    0.28
  -4  -6   7    3.69    0.38
   4   6  -7    4.13    0.42
   4   6  -7    4.01    0.35
  -4   6   7    4.23    0.25
  -3  -6   7    9.62    0.41
   3  -6  -7    9.29    0.36
  -3  -6   7    8.78    0.45
  -3   6   7    8.75    0.35
   3   6  -7    9.13    0.42
   3   6  -7    9.48    0.43
   2  -6  -7   30.84    0.85
  -2  -6   7   31.08    0.87
   2   6  -7   31.39    0.86
  -2   6   7   31.31    0.84
   2   6  -7   30.31    0.87
   1  -6  -7    3.80    0.31
  -1  -6   7    3.52    0.34
   1   6  -7    3.06    0.31
  -1   6   7    3.61    0.28
   1   6  -7    3.49    0.32
   0  -6   7    2.83    0.26
   0  -6  -7    2.87    0.31
   0   6  -7    2.90    0.30
   0   6   7    2.80    0.21
   0   6  -7    2.55    0.29
  -1  -6  -7    0.28    0.18
   1  -6   7    0.42    0.14
   1   6   7    0.39    0.16
  -1   6  -7    0.34    0.15
  -1   6  -7    0.47    0.16
  -2  -6  -7    7.63    0.41
   2  -6   7    7.81    0.32
   2   6   7    8.18    0.38
  -2   6  -7    7.36    0.34
  -2   6  -7    7.57    0.34
   3  -6   7   43.53    1.13
  -3  -6  -7   44.99    1.19
  -3   6  -7   43.84    1.14
   3   6   7   43.69    1.18
  -3   6  -7   44.20    1.13
  -4  -6  -7    0.17    0.22
   4  -6   7    0.50    0.13
  -4   6  -7    0.36    0.14
  -4   6  -7    0.41    0.14
   4   6   7    0.44    0.21
   5  -6   7    0.70    0.14
  -5  -6  -7    0.60    0.21
  -5   6  -7    0.82    0.13
  -5   6  -7    1.00    0.14
   5   6   7    0.34    0.20
  -6  -6  -7    1.42    0.25
   6  -6   7    1.32    0.15
  -6   6  -7    1.33    0.16
  -6   6  -7    1.25    0.13
   6   6   7    1.32    0.21
  -7  -6  -7   15.61    0.59
   7   6   7   14.39    0.57
  -7   6  -7   15.20    0.42
  -7   6  -7   14.94    0.42
  -8  -6  -7    2.05    0.25
   8   6   7    2.19    0.25
  -9  -6  -7    0.60    0.24
   9   6   7    0.15    0.20
 -10  -6  -7   -0.40    0.24
 -11  -6  -7    0.71    0.46
  11   6   7    0.37    0.28
 -10  -7   7    2.56    0.32
  10   7  -7    2.05    0.31
  -9  -7   7    3.31    0.33
   9  -7  -7    2.60    0.19
   9  -7  -7    2.85    0.20
   9   7  -7    2.47    0.29
   9   7  -7    2.53    0.28
  -8  -7   7    5.08    0.48
   8  -7  -7    5.35    0.24
   8   7  -7    4.83    0.45
   8   7  -7    5.12    0.41
  -7  -7   7   14.10    0.58
  -7  -7   7   14.59    0.60
   7   7  -7   13.75    0.58
   7   7  -7   13.78    0.57
  -7   7   7   13.44    0.40
  -6  -7   7   21.84    0.70
   6  -7  -7   21.21    0.60
  -6  -7   7   21.50    0.74
   6   7  -7   20.81    0.71
  -6   7   7   22.07    0.59
   6   7  -7   22.19    0.71
  -5  -7   7    2.52    0.24
  -5  -7   7    2.34    0.28
   5  -7  -7    2.23    0.24
   5   7  -7    2.37    0.26
   5   7  -7    2.01    0.23
  -5   7   7    2.53    0.21
  -4  -7   7    0.62    0.22
  -4  -7   7    1.22    0.21
   4  -7  -7    1.00    0.16
  -4   7   7    1.08    0.15
   4   7  -7    0.89    0.22
   4   7  -7    0.96    0.21
   3  -7  -7    2.59    0.28
  -3  -7   7    2.67    0.23
  -3  -7   7    2.27    0.25
   3   7  -7    2.50    0.24
  -3   7   7    2.77    0.26
   3   7  -7    2.59    0.25
  -2  -7   7    1.17    0.19
  -2  -7   7    1.21    0.22
   2  -7  -7    0.99    0.18
  -2   7   7    1.18    0.17
   2   7  -7    1.30    0.21
   2   7  -7    0.88    0.19
   1  -7  -7    4.89    0.34
  -1  -7   7    4.43    0.33
   1   7  -7    4.26    0.35
  -1   7   7    4.33    0.31
   0  -7   7    1.41    0.18
   0  -7  -7    1.33    0.21
   0   7   7    1.16    0.18
   0   7  -7    1.26    0.19
   0   7  -7    1.28    0.19
  -1  -7  -7    2.46    0.23
   1  -7   7    2.38    0.20
   1   7   7    2.68    0.22
  -1   7  -7    2.19    0.20
  -1   7  -7    2.34    0.20
   2  -7   7   32.73    0.89
  -2  -7  -7   33.68    0.94
  -2   7  -7   32.01    0.89
  -2   7  -7   32.87    0.89
   2   7   7   33.72    0.93
  -3  -7  -7   11.28    0.49
   3  -7   7   10.68    0.39
  -3   7  -7   10.79    0.40
  -3   7  -7   11.12    0.39
   3   7   7    9.92    0.52
  -4  -7  -7   48.26    1.40
   4  -7   7   48.13    1.23
   4   7   7   47.68    1.29
  -4   7  -7   48.66    1.23
  -4   7  -7   47.97    1.23
  -5  -7  -7    0.14    0.21
   5  -7   7    0.29    0.13
  -5   7  -7    0.04    0.13
   5   7   7    0.13    0.20
  -5   7  -7    0.23    0.13
  -6  -7  -7    1.49    0.24
   6  -7   7    1.17    0.14
  -6   7  -7    1.33    0.13
   6   7   7    1.26    0.24
  -6   7  -7    1.56    0.13
   7  -7   7   -0.01    0.11
  -7  -7  -7    0.02    0.23
   7   7   7   -0.21    0.21
  -7   7  -7    0.01    0.09
  -8  -7  -7    0.15    0.23
   8  -7   7   -0.19    0.17
   8   7   7   -0.53    0.20
  -9  -7  -7    0.66    0.25
   9   7   7    0.18    0.23
 -10  -7  -7    1.16    0.30
  10   7   7    0.57    0.28
  10   8  -7    0.71    0.31
  -9  -8   7    1.41    0.30
   9   8  -7    1.05    0.28
  -8  -8   7    0.36    0.28
   8  -8  -7    0.79    0.12
   8   8  -7    0.45    0.23
   8   8  -7    0.51    0.27
  -7  -8   7   18.30    0.70
   7   8  -7   18.51    0.65
   7   8  -7   17.73    0.66
  -7   8   7   17.30    0.49
   6  -8  -7   13.56    0.42
  -6  -8   7   13.26    0.60
  -6  -8   7   13.48    0.54
  -6   8   7   13.14    0.44
   6   8  -7   13.72    0.57
   6   8  -7   13.44    0.57
  -5  -8   7   10.18    0.47
  -5  -8   7   10.14    0.54
   5  -8  -7   10.05    0.37
  -5   8   7   10.37    0.35
   5   8  -7    9.70    0.51
   5   8  -7   10.47    0.49
   4  -8  -7    0.64    0.15
  -4  -8   7    0.66    0.21
  -4  -8   7    0.44    0.24
   4   8  -7    0.22    0.21
   4   8  -7    0.63    0.21
  -4   8   7    0.50    0.15
   3  -8  -7    0.46    0.17
  -3  -8   7    0.46    0.22
  -3  -8   7    0.48    0.19
   3   8  -7    0.32    0.26
   3   8  -7    0.30    0.20
  -3   8   7    0.57    0.15
  -2  -8   7    0.40    0.18
  -2  -8   7    0.96    0.23
   2  -8  -7    0.86    0.18
   2   8  -7    0.76    0.20
  -2   8   7    0.80    0.17
   2   8  -7    0.96    0.22
  -1  -8   7    8.42    0.43
  -1  -8   7    8.43    0.39
   1  -8  -7    8.52    0.40
   1   8  -7    8.12    0.41
  -1   8   7    8.49    0.38
   1   8  -7    8.60    0.42
   0  -8  -7    0.33    0.19
   0  -8   7    0.06    0.16
   0   8  -7    0.36    0.18
   0   8   7    0.31    0.18
   0   8  -7    0.19    0.17
  -1  -8  -7    3.46    0.36
   1  -8   7    2.84    0.30
  -1   8  -7    3.49    0.32
   1   8   7    3.11    0.35
  -1   8  -7    3.34    0.31
   2  -8   7   35.03    0.94
  -2  -8  -7   35.62    0.99
  -2   8  -7   34.34    0.94
   2   8   7   34.00    0.98
  -2   8  -7   34.26    0.93
   3  -8   7   77.22    1.92
  -3  -8  -7   76.36    1.98
  -3   8  -7   76.09    1.92
   3   8   7   77.57    1.97
  -3   8  -7   75.80    1.92
   4  -8   7   20.35    0.58
  -4  -8  -7   20.30    0.70
  -4   8  -7   19.74    0.57
   4   8   7   18.91    0.68
  -4   8  -7   19.44    0.58
  -5  -8  -7    1.04    0.24
   5  -8   7    0.85    0.14
  -5   8  -7    1.00    0.16
  -5   8  -7    0.84    0.25
   5   8   7    0.91    0.25
   6  -8   7    0.58    0.13
  -6  -8  -7    0.31    0.23
   6   8   7    0.36    0.23
  -6   8  -7    0.55    0.12
  -6   8  -7    0.67    0.12
   7  -8   7    0.27    0.12
  -7  -8  -7    0.36    0.27
   7   8   7    0.28    0.21
  -8  -8  -7    4.57    0.48
   8   8   7    4.04    0.32
  -9  -8  -7    0.38    0.28
  -9  -9   7    0.36    0.45
   9   9  -7    0.91    0.29
  -8  -9   7    3.09    0.34
   8  -9  -7    2.98    0.29
   8   9  -7    3.36    0.34
   8   9  -7    4.04    0.47
  -7  -9   7    5.64    0.54
   7  -9  -7    6.11    0.30
  -7   9   7    6.67    0.25
   7   9  -7    6.60    0.49
   7   9  -7    6.23    0.45
  -7   9   7    6.61    0.24
   6  -9  -7   10.30    0.36
  -6  -9   7    9.65    0.58
   6   9  -7   10.84    0.53
   6   9  -7    9.47    0.53
   5  -9  -7    2.33    0.24
  -5  -9   7    2.49    0.32
   5   9  -7    2.29    0.27
   5   9  -7    1.96    0.27
  -5   9   7    2.48    0.22
   4  -9  -7    3.85    0.28
  -4  -9   7    4.08    0.37
  -4  -9   7    3.99    0.33
   4   9  -7    3.86    0.31
  -4   9   7    3.77    0.27
   4   9  -7    3.16    0.27
   3  -9  -7    1.38    0.18
  -3  -9   7    1.19    0.20
   3   9  -7    1.35    0.24
   3   9  -7    1.12    0.22
  -3   9   7    1.13    0.17
   2  -9  -7    4.48    0.34
  -2  -9   7    4.27    0.42
  -2  -9   7    3.59    0.33
   2   9  -7    4.54    0.38
   2   9  -7    4.80    0.38
  -2   9   7    3.97    0.31
  -1  -9   7    0.13    0.17
  -1  -9   7    0.37    0.23
   1  -9  -7    0.68    0.20
   1   9  -7    0.43    0.20
  -1   9   7    0.65    0.17
   1   9  -7    0.63    0.20
   0  -9  -7    2.02    0.23
   0  -9   7    1.74    0.19
   0   9   7    1.53    0.21
   0   9  -7    1.85    0.21
   0   9  -7    1.97    0.21
   1  -9   7    9.60    0.41
  -1  -9  -7    9.58    0.47
   1   9   7    9.38    0.45
  -1   9  -7    9.24    0.41
  -1   9  -7    9.97    0.42
  -2  -9  -7    6.67    0.45
   2  -9   7    6.64    0.34
  -2   9  -7    6.37    0.35
   2   9   7    6.69    0.42
  -2   9  -7    6.83    0.36
   3  -9   7   30.99    0.84
  -3  -9  -7   30.85    0.93
  -3   9  -7   30.18    0.84
  -3   9  -7   30.52    0.84
   3   9   7   29.94    0.92
  -4  -9  -7    6.84    0.49
   4  -9   7    6.96    0.33
  -4   9  -7    6.83    0.32
   4   9   7    6.60    0.47
  -4   9  -7    7.09    0.33
  -5  -9  -7    1.54    0.26
   5  -9   7    1.99    0.17
   5   9   7    2.22    0.30
  -5   9  -7    1.79    0.17
  -5   9  -7    1.90    0.17
  -6  -9  -7    1.98    0.30
  -6   9  -7    1.93    0.15
   6   9   7    2.59    0.27
  -6   9  -7    1.77    0.14
  -7  -9  -7    1.57    0.29
   7   9   7    1.75    0.25
  -8  -9  -7    0.31    0.27
   8   9   7    0.34    0.27
  -7 -10   7    0.61    0.32
   7  10  -7    0.71    0.27
  -7  10   7    0.60    0.13
  -7  10   7    0.93    0.11
  -6 -10   7    2.30    0.32
   6 -10  -7    1.73    0.16
   6  10  -7    2.38    0.29
  -6  10   7    2.21    0.21
   6  10  -7    2.41    0.27
  -6  10   7    2.26    0.22
   5 -10  -7    0.87    0.16
  -5 -10   7    1.46    0.30
   5  10  -7    0.45    0.25
   5  10  -7    0.95    0.26
  -5  10   7    1.03    0.17
  -4 -10   7    2.28    0.32
   4 -10  -7    2.05    0.19
   4  10  -7    1.99    0.27
  -4  10   7    2.02    0.19
   4  10  -7    2.72    0.30
  -3 -10   7    2.54    0.31
   3 -10  -7    2.86    0.31
  -3  10   7    3.05    0.28
   3  10  -7    2.79    0.29
   3  10  -7    2.48    0.27
  -2 -10   7    1.26    0.33
   2 -10  -7    1.56    0.21
  -2  10   7    1.76    0.20
   2  10  -7    1.73    0.25
   2  10  -7    1.37    0.23
  -1 -10   7    0.06    0.17
   1 -10  -7   -0.17    0.20
  -1 -10   7    0.33    0.24
   1  10  -7    0.08    0.20
   1  10  -7   -0.04    0.20
  -1  10   7    0.01    0.19
   0 -10   7    0.67    0.18
   0 -10  -7    1.02    0.23
   0  10  -7    1.09    0.22
   0  10  -7    0.72    0.21
   0  10   7    0.67    0.20
  -1 -10  -7    0.78    0.25
   1 -10   7    0.72    0.20
   1  10   7    0.40    0.35
  -1  10  -7    0.87    0.20
  -1  10  -7    0.92    0.20
   2 -10   7   -0.14    0.17
  -2 -10  -7    0.03    0.23
   2  10   7   -0.07    0.21
  -2  10  -7    0.06    0.18
  -2  10  -7   -0.27    0.17
   3 -10   7    0.97    0.19
  -3 -10  -7    0.86    0.25
  -3  10  -7    0.82    0.18
   3  10   7    1.03    0.24
  -3  10  -7    1.23    0.18
  -4 -10  -7   12.47    0.61
  -4  10  -7   12.31    0.44
  -4  10  -7   12.52    0.43
   4  10   7   12.19    0.56
  -5 -10  -7    1.04    0.31
   5  10   7    0.54    0.24
  -5  10  -7    1.00    0.20
  -5  10  -7    0.84    0.15
  -6 -10  -7   -0.23    0.29
  -6  10  -7    0.08    0.11
  -6  10  -7    0.20    0.12
   6  10   7    0.18    0.23
  -7 -10  -7    0.16    0.30
   7  10   7    0.06    0.28
  -6 -11   7   -0.14    0.31
  -6  11   7    0.03    0.13
   6  11  -7    0.64    0.27
  -5 -11   7    5.26    0.40
   5  11  -7    3.63    0.33
   5  11  -7    3.67    0.32
  -5  11   7    4.39    0.29
   4 -11  -7    0.22    0.18
  -4 -11   7    0.25    0.31
   4  11  -7    0.63    0.25
   4  11  -7    0.43    0.26
  -4  11   7    0.44    0.17
  -4  11   7    0.30    0.23
   3 -11  -7    0.60    0.19
  -3 -11   7    0.59    0.30
  -3  11   7    0.48    0.20
   3  11  -7    0.97    0.25
  -3  11   7    0.66    0.19
   3  11  -7    0.52    0.25
  -2 -11   7   15.64    0.66
   2 -11  -7   15.32    0.57
   2  11  -7   15.30    0.60
   2  11  -7   16.59    0.61
  -2  11   7   15.59    0.56
   1 -11  -7    2.36    0.26
  -1 -11   7    3.46    0.31
  -1  11   7    2.75    0.24
   1  11  -7    3.10    0.34
   1  11  -7    2.64    0.26
   0 -11  -7    0.14    0.22
   0  11  -7   -0.01    0.20
   0  11  -7   -0.06    0.19
   0  11   7   -0.16    0.21
  -1 -11  -7    1.37    0.27
  -1  11  -7    1.02    0.24
   1  11   7    1.59    0.24
  -1  11  -7    1.26    0.21
  -2 -11  -7   -0.16    0.26
  -2  11  -7   -0.15    0.18
   2  11   7   -0.04    0.23
  -2  11  -7   -0.51    0.20
  -3 -11  -7   -0.15    0.29
  -3  11  -7   -0.32    0.17
   3  11   7    0.05    0.24
  -3  11  -7   -0.43    0.22
  -4 -11  -7    0.46    0.28
   4  11   7   -0.38    0.23
  -4  11  -7    0.15    0.16
  -4  11  -7    0.38    0.23
   4  11   7    0.40    0.25
  -5 -11  -7    1.82    0.31
   5  11   7    1.46    0.25
  -5  11  -7    2.02    0.17
   5  11   7    1.44    0.31
  -3 -12   7    0.07    0.29
  -3  12   7   -0.20    0.18
   3  12  -7    0.31    0.24
  -2 -12   7    7.10    0.57
   2 -12  -7    6.07    0.46
   2  12  -7    7.33    0.51
  -2  12   7    6.71    0.40
   1 -12  -7    2.24    0.29
  -1 -12   7    2.70    0.32
  -1  12   7    3.12    0.29
   1  12  -7    2.55    0.28
  -1  12   7    2.00    0.24
   1  12  -7    2.12    0.31
   0 -12  -7   -0.01    0.43
   0  12  -7    0.53    0.22
   0  12   7   -0.08    0.27
   0  12  -7    0.18    0.29
   0  12   7    0.66    0.23
  -1 -12  -7    0.48    0.27
   1  12   7    0.97    0.25
  -1  12  -7    0.67    0.30
  -1  12  -7    0.70    0.21
   1  12   7    0.56    0.27
  -2 -12  -7    0.36    0.27
   2  12   7    0.75    0.24
  -2  12  -7    0.04    0.20
  12   0  -8   53.95    1.38
  12   0  -8   50.36    1.37
 -11   0   8    9.92    0.40
  11   0  -8   10.23    0.42
  11   0  -8    9.66    0.42
 -10   0   8    0.34    0.17
  10   0  -8    0.10    0.16
  10   0  -8    0.43    0.18
   9   0  -8   28.12    0.79
   9   0  -8   28.17    0.80
  -9   0   8   27.08    0.77
   8   0  -8   26.77    0.77
  -8   0   8   25.98    0.74
   8   0  -8   26.87    0.76
  -7   0   8    2.59    0.27
   7   0  -8    2.88    0.30
   7   0  -8    2.82    0.21
   6   0  -8   42.62    1.12
  -6   0   8   43.05    1.10
   6   0  -8   41.53    1.11
  -5   0   8    2.69    0.26
   5   0  -8    2.87    0.27
   5   0  -8    2.68    0.27
   4   0  -8    5.86    0.30
  -4   0   8    5.23    0.28
   3   0  -8  231.36    5.54
  -3   0   8  223.70    5.54
  -2   0   8  279.78    6.81
   2   0  -8  280.82    6.81
   1   0  -8   64.79    1.60
  -1   0   8   62.65    1.60
   0   0   8   47.58    1.22
   0   0  -8   47.91    1.22
   1   0   8   24.24    0.66
  -1   0  -8   24.05    0.67
   2   0   8    4.30    0.26
  -2   0  -8    4.32    0.27
  -3   0  -8    7.02    0.31
   3   0   8    7.46    0.31
  -4   0  -8   20.50    0.60
   4   0   8   21.00    0.60
   5   0   8    9.85    0.37
  -5   0  -8    9.86    0.38
   6   0   8    0.15    0.17
  -6   0  -8   -0.06    0.15
   7   0   8  188.91    4.57
  -7   0  -8  184.29    4.57
   8   0   8   17.41    0.57
  -8   0  -8   19.03    0.58
   9   0   8    2.05    0.19
  -9   0  -8    2.86    0.31
  10   0   8    0.62    0.18
 -10   0  -8    0.72    0.19
 -11   0  -8    3.76    0.33
  11   0   8    3.15    0.30
 -12   0  -8    0.93    0.20
  12   0   8    0.59    0.19
  12  -1  -8    0.71    0.17
  12  -1  -8    0.89    0.17
  12   1  -8    0.49    0.24
  12   1  -8    0.98    0.21
  11  -1  -8    2.57    0.27
  11  -1  -8    2.67    0.21
 -11  -1   8    2.99    0.29
  11   1  -8    2.77    0.24
  11   1  -8    2.58    0.24
 -11   1   8    2.64    0.27
 -10  -1   8    0.16    0.17
  10  -1  -8    0.20    0.15
  10  -1  -8    0.58    0.18
  10   1  -8    0.70    0.19
 -10   1   8    0.22    0.14
  10   1  -8    0.50    0.19
   9  -1  -8    5.30    0.31
  -9  -1   8    5.15    0.33
   9  -1  -8    5.24    0.33
   9   1  -8    5.24    0.35
   9   1  -8    5.84    0.36
  -9   1   8    5.61    0.29
   8  -1  -8   47.83    1.23
  -8  -1   8   46.99    1.23
   8  -1  -8   47.52    1.23
  -8   1   8   46.99    1.22
   8   1  -8   46.67    1.24
   8   1  -8   47.59    1.25
   7  -1  -8   17.01    0.54
   7  -1  -8   16.97    0.53
  -7  -1   8   17.03    0.54
  -7   1   8   16.84    0.52
   7   1  -8   17.05    0.55
   7   1  -8   17.05    0.56
   6  -1  -8    0.31    0.15
  -6  -1   8    0.07    0.15
   6  -1  -8    0.11    0.16
  -6   1   8    0.21    0.14
   6   1  -8    0.39    0.31
   6   1  -8    0.38    0.17
   5  -1  -8    5.04    0.29
  -5  -1   8    5.50    0.30
  -5   1   8    5.29    0.28
   5   1  -8    4.84    0.31
   5   1  -8    5.47    0.32
   4  -1  -8   14.19    0.44
  -4  -1   8   14.29    0.46
   4   1  -8   13.75    0.46
   4   1  -8   14.43    0.47
  -4   1   8   13.92    0.44
   3  -1  -8   93.35    2.31
  -3  -1   8   94.38    2.31
  -3   1   8   92.11    2.30
   3   1  -8   92.70    2.31
   2  -1  -8  166.81    4.05
  -2  -1   8  162.52    4.05
   2   1  -8  163.43    4.06
  -2   1   8  170.59    4.05
  -1  -1   8   29.48    0.79
   1  -1  -8   29.30    0.79
   1   1  -8   28.55    0.78
  -1   1   8   29.56    0.78
   0  -1  -8    0.07    0.13
   0  -1   8    0.38    0.14
   0   1   8    0.05    0.13
   0   1  -8    0.29    0.13
   1  -1   8    0.15    0.13
  -1  -1  -8    0.23    0.15
  -1   1  -8    0.26    0.14
   1   1   8    0.41    0.14
   2  -1   8   17.82    0.52
  -2  -1  -8   17.99    0.53
  -2   1  -8   17.66    0.52
   2   1   8   17.60    0.53
   3  -1   8   -0.15    0.12
  -3  -1  -8    0.06    0.15
  -3   1  -8   -0.05    0.14
   3   1   8   -0.19    0.14
   4  -1   8    0.51    0.13
  -4  -1  -8    0.59    0.16
   4   1   8    0.53    0.14
  -4   1  -8    0.53    0.14
   5  -1   8   -0.04    0.13
  -5  -1  -8    0.07    0.15
   5   1   8    0.01    0.14
  -5   1  -8    0.18    0.15
   6  -1   8    6.72    0.31
  -6  -1  -8    6.66    0.35
   6   1   8    5.72    0.34
  -6   1  -8    6.13    0.32
   7  -1   8    1.52    0.18
   7   1   8    2.16    0.19
  -7   1  -8    1.79    0.18
  -8  -1  -8   11.85    0.46
   8  -1   8   11.42    0.41
   8   1   8   11.95    0.44
  -9  -1  -8    1.07    0.20
   9  -1   8    0.67    0.16
   9   1   8    0.77    0.18
  -9   1  -8    0.75    0.17
 -10  -1  -8   -0.04    0.18
  10  -1   8    0.10    0.15
  10   1   8   -0.12    0.16
 -10   1  -8    0.28    0.18
  11  -1   8    7.75    0.36
 -11  -1  -8    8.73    0.43
 -11   1  -8    8.83    0.39
  11   1   8    8.75    0.40
 -12  -1  -8   -0.01    0.21
  12  -1   8   -0.20    0.16
  12   1   8   -0.18    0.23
 -12   1  -8    0.12    0.19
  12  -2  -8    7.40    0.35
  12  -2  -8    7.04    0.34
  12   2  -8    8.50    0.45
 -11  -2   8    0.41    0.18
  11  -2  -8   -0.08    0.16
  11  -2  -8   -0.06    0.14
  11   2  -8    0.30    0.19
 -11   2   8   -0.18    0.14
  11   2  -8   -0.08    0.20
  10  -2  -8    0.10    0.14
  10  -2  -8   -0.11    0.17
 -10  -2   8    0.03    0.18
  10   2  -8   -0.47    0.19
  10   2  -8   -0.33    0.18
 -10   2   8    0.11    0.14
   9  -2  -8    1.49    0.16
   9  -2  -8    1.81    0.19
  -9  -2   8    1.56    0.20
   9   2  -8    1.65    0.20
  -9   2   8    1.61    0.16
   9   2  -8    1.91    0.22
  -8  -2   8    7.41    0.38
   8  -2  -8    7.23    0.33
   8  -2  -8    7.71    0.34
  -8   2   8    6.71    0.31
   8   2  -8    7.17    0.40
   8   2  -8    7.44    0.39
  -7  -2   8    2.43    0.21
   7  -2  -8    2.22    0.18
   7  -2  -8    3.03    0.28
   7   2  -8    1.81    0.21
   7   2  -8    2.11    0.22
  -7   2   8    2.47    0.24
   6  -2  -8    2.50    0.25
  -6  -2   8    2.60    0.21
   6   2  -8    1.99    0.21
   6   2  -8    2.19    0.21
  -6   2   8    2.50    0.24
  -5  -2   8    5.04    0.31
   5  -2  -8    4.32    0.28
   5   2  -8    4.56    0.32
   5   2  -8    4.69    0.32
  -5   2   8    4.95    0.27
  -4  -2   8    0.69    0.16
   4  -2  -8    0.89    0.15
  -4   2   8    0.84    0.13
   4   2  -8    1.31    0.18
   4   2  -8    0.72    0.17
  -3  -2   8   59.92    1.53
   3  -2  -8   59.55    1.53
   3   2  -8   60.96    1.54
  -3   2   8   61.61    1.53
   3   2  -8   61.09    1.54
  -2  -2   8    2.37    0.25
   2  -2  -8    2.58    0.25
   2   2  -8    2.30    0.26
   2   2  -8    2.13    0.18
  -2   2   8    2.25    0.24
   1  -2  -8   13.00    0.44
  -1  -2   8   13.15    0.43
   1   2  -8   13.43    0.43
  -1   2   8   13.26    0.43
   0  -2  -8   14.03    0.45
   0  -2   8   13.52    0.43
   0   2   8   13.36    0.44
   0   2  -8   12.71    0.43
  -1  -2  -8    4.79    0.29
   1  -2   8    5.32    0.27
  -1   2  -8    4.81    0.27
   1   2   8    4.97    0.28
  -2  -2  -8    0.15    0.15
   2  -2   8    0.29    0.12
   2   2   8    0.26    0.13
  -2   2  -8    0.30    0.14
  -3  -2  -8    1.24    0.16
   3  -2   8    1.47    0.15
  -3   2  -8    1.34    0.15
   3   2   8    1.24    0.16
  -4  -2  -8    1.68    0.19
   4  -2   8    1.30    0.15
  -4   2  -8    1.62    0.16
   4   2   8    1.31    0.17
   5  -2   8    5.31    0.28
  -5  -2  -8    5.67    0.34
   5   2   8    5.88    0.33
  -5   2  -8    5.84    0.29
   6  -2   8    1.61    0.17
  -6  -2  -8    1.57    0.20
   6   2   8    1.49    0.20
  -6   2  -8    1.67    0.17
  -7  -2  -8    5.21    0.36
   7  -2   8    5.08    0.28
  -7   2  -8    4.85    0.30
   7   2   8    5.34    0.34
  -8  -2  -8    6.34    0.38
   8  -2   8    6.38    0.31
  -8   2  -8    6.26    0.31
   8   2   8    6.64    0.35
  -9  -2  -8    0.71    0.21
   9  -2   8    0.90    0.16
  -9   2  -8    0.83    0.17
   9   2   8    0.85    0.18
 -10  -2  -8    1.48    0.23
  10  -2   8    1.18    0.16
 -10   2  -8    1.12    0.17
  10   2   8    1.20    0.21
 -11  -2  -8   -0.29    0.20
  11  -2   8    0.10    0.14
 -11   2  -8    0.20    0.16
  11   2   8   -0.05    0.17
 -12  -2  -8   -0.08    0.21
  12  -2   8    0.06    0.15
 -12   2  -8   -0.15    0.15
  12  -3  -8    0.17    0.16
  12   3  -8    0.32    0.24
  11  -3  -8    5.57    0.27
  11  -3  -8    4.92    0.30
  11   3  -8    5.49    0.44
  11   3  -8    5.14    0.41
  10  -3  -8    0.27    0.13
 -10  -3   8    0.05    0.18
  10  -3  -8   -0.02    0.15
  10   3  -8    0.16    0.23
  10   3  -8    0.02    0.17
 -10   3   8    0.37    0.14
   9  -3  -8    0.30    0.15
  -9  -3   8    0.14    0.19
   9  -3  -8    0.18    0.13
   9   3  -8    0.15    0.21
  -9   3   8    0.14    0.13
   9   3  -8    0.12    0.18
  -8  -3   8   11.12    0.46
   8  -3  -8   11.86    0.42
   8  -3  -8   11.41    0.39
  -8   3   8   11.50    0.38
   8   3  -8   11.57    0.48
   8   3  -8   11.33    0.48
  -7  -3   8   25.80    0.74
   7  -3  -8   24.64    0.70
   7  -3  -8   24.82    0.70
   7   3  -8   25.66    0.75
  -7   3   8   24.32    0.68
   7   3  -8   25.90    0.76
   6  -3  -8    0.46    0.14
  -6  -3   8    0.44    0.18
   6   3  -8    0.22    0.18
   6   3  -8    0.36    0.19
  -6   3   8    0.56    0.14
   5  -3  -8    0.80    0.15
  -5  -3   8    1.11    0.18
   5   3  -8    0.74    0.18
   5   3  -8    0.97    0.20
  -5   3   8    0.71    0.14
  -4  -3   8    2.75    0.29
   4  -3  -8    2.96    0.26
  -4   3   8    2.89    0.23
   4   3  -8    2.77    0.31
   4   3  -8    2.75    0.22
   3  -3  -8    0.40    0.14
  -3  -3   8    0.38    0.16
   3   3  -8    0.36    0.16
  -3   3   8    0.14    0.13
   3   3  -8    0.38    0.16
  -2  -3   8    3.04    0.27
   2  -3  -8    3.16    0.27
   2   3  -8    3.20    0.28
   2   3  -8    3.11    0.28
  -2   3   8    3.32    0.25
  -1  -3   8    2.21    0.24
   1  -3  -8    1.84    0.16
  -1   3   8    2.48    0.25
   1   3  -8    1.51    0.16
   1   3  -8    1.94    0.17
   0  -3   8    6.27    0.30
   0  -3  -8    6.62    0.32
   0   3   8    6.85    0.30
   0   3  -8    6.65    0.31
   0   3  -8    6.60    0.31
  -1  -3  -8   50.15    1.29
   1  -3   8   50.93    1.28
   1   3   8   51.06    1.29
  -1   3  -8   48.40    1.27
   2  -3   8  126.74    3.13
  -2  -3  -8  127.78    3.14
   2   3   8  126.86    3.14
  -2   3  -8  128.08    3.13
   3  -3   8   37.97    0.99
  -3  -3  -8   37.60    1.02
  -3   3  -8   38.96    0.99
   3   3   8   38.29    1.01
   4  -3   8    2.66    0.24
  -4  -3  -8    3.00    0.32
  -4   3  -8    2.79    0.25
   4   3   8    2.32    0.20
   5  -3   8    3.51    0.24
  -5  -3  -8    3.32    0.34
  -5   3  -8    2.75    0.25
   6  -3   8    2.21    0.22
  -6  -3  -8    1.98    0.28
  -6   3  -8    2.30    0.25
   6   3   8    1.76    0.20
   7  -3   8    0.47    0.13
  -7  -3  -8    0.45    0.20
  -7   3  -8    0.55    0.15
   7   3   8    0.33    0.18
  -8  -3  -8    0.84    0.21
   8  -3   8    0.82    0.14
  -8   3  -8    0.87    0.15
   8   3   8    0.78    0.18
   9  -3   8    1.56    0.15
  -9  -3  -8    1.37    0.23
   9   3   8    1.43    0.20
 -10  -3  -8    0.39    0.22
  10  -3   8    0.24    0.13
  10   3   8    0.24    0.18
 -10   3  -8    0.32    0.15
 -11  -3  -8    1.65    0.24
  11  -3   8    2.19    0.24
  11   3   8    1.15    0.26
 -11   3  -8    1.65    0.16
 -12  -3  -8   10.76    0.52
  12  -3   8   10.93    0.37
 -12   3  -8   10.74    0.36
  12  -4  -8   -0.28    0.15
  12   4  -8    0.32    0.27
  11  -4  -8    0.31    0.16
  11   4  -8    0.50    0.24
  10  -4  -8    4.93    0.28
 -10  -4   8    5.11    0.40
  10  -4  -8    4.56    0.30
 -10   4   8    4.68    0.23
  10   4  -8    3.76    0.36
   9  -4  -8    0.03    0.14
   9  -4  -8   -0.04    0.11
   9   4  -8   -0.06    0.21
   9   4  -8    0.13    0.17
  -9   4   8   -0.03    0.13
   8  -4  -8    3.85    0.24
   8  -4  -8    3.46    0.28
  -8  -4   8    3.26    0.36
   8   4  -8    3.59    0.35
   8   4  -8    4.07    0.38
  -8   4   8    3.67    0.24
  -7  -4   8    0.17    0.18
   7  -4  -8    0.27    0.14
  -7   4   8    0.31    0.13
   7   4  -8    0.37    0.21
   7   4  -8    0.01    0.19
  -6  -4   8    3.10    0.34
   6  -4  -8    3.35    0.26
   6   4  -8    3.25    0.35
  -6   4   8    3.59    0.24
   6   4  -8    3.26    0.36
  -5  -4   8   23.00    0.68
   5  -4  -8   22.38    0.63
   5   4  -8   22.07    0.68
  -5   4   8   22.00    0.62
   5   4  -8   22.21    0.69
   4  -4  -8    0.62    0.15
  -4  -4   8    0.71    0.18
   4   4  -8    0.46    0.18
  -4   4   8    0.67    0.14
   4   4  -8    0.76    0.18
  -3  -4   8    0.42    0.17
   3  -4  -8    0.42    0.15
  -3   4   8    0.49    0.14
   3   4  -8    0.05    0.17
   3   4  -8    0.16    0.18
  -2  -4   8   12.40    0.44
   2  -4  -8   12.63    0.43
   2   4  -8   12.92    0.46
  -2   4   8   12.25    0.42
   2   4  -8   12.95    0.45
  -1  -4   8   55.15    1.36
   1  -4  -8   52.90    1.36
   1   4  -8   53.50    1.37
  -1   4   8   53.34    1.36
   1   4  -8   50.84    1.36
   0  -4  -8    2.29    0.19
   0  -4   8    2.00    0.17
   0   4  -8    2.42    0.26
   0   4   8    2.43    0.19
   0   4  -8    2.38    0.26
   1  -4   8    0.16    0.13
  -1  -4  -8    0.14    0.16
  -1   4  -8    0.00    0.14
  -1   4  -8    0.13    0.15
   1   4   8    0.11    0.15
   2  -4   8    9.91    0.35
  -2  -4  -8    9.44    0.40
   2   4   8    9.52    0.39
  -2   4  -8    9.52    0.36
  -2   4  -8    9.14    0.36
   3  -4   8    0.51    0.13
  -3  -4  -8    0.13    0.18
  -3   4  -8    0.42    0.14
  -3   4  -8    0.41    0.14
   3   4   8    0.52    0.17
  -4  -4  -8    0.64    0.19
   4  -4   8    0.83    0.14
  -4   4  -8    0.90    0.15
   4   4   8    0.79    0.17
  -5  -4  -8   16.67    0.57
   5  -4   8   16.18    0.49
   5   4   8   17.47    0.56
  -5   4  -8   15.99    0.50
  -6  -4  -8    0.10    0.21
   6  -4   8   -0.03    0.14
   6   4   8   -0.23    0.17
  -6   4  -8    0.06    0.13
  -7  -4  -8   -0.06    0.19
   7  -4   8    0.10    0.13
  -7   4  -8    0.21    0.13
   7   4   8    0.05    0.19
   8  -4   8   33.68    0.88
  -8  -4  -8   32.30    0.97
  -8   4  -8   34.24    0.88
   8   4   8   34.96    0.96
   9  -4   8    3.32    0.23
  -9  -4  -8    3.93    0.39
   9   4   8    3.44    0.35
  -9   4  -8    3.30    0.23
  10  -4   8    1.07    0.14
 -10  -4  -8    1.36    0.26
 -10   4  -8    1.25    0.13
  10   4   8    0.92    0.20
  11  -4   8    1.80    0.14
 -11  -4  -8    1.69    0.27
  11  -5  -8    0.18    0.14
  11   5  -8   -0.01    0.25
  10  -5  -8    0.33    0.13
  10  -5  -8    0.18    0.14
 -10   5   8    0.31    0.10
  10   5  -8    0.17    0.25
  10   5  -8   -0.04    0.21
   9  -5  -8    1.00    0.16
  -9  -5   8    0.34    0.23
   9   5  -8    0.81    0.24
  -9   5   8    0.60    0.11
   9   5  -8    0.37    0.19
   8  -5  -8    4.63    0.27
   8  -5  -8    4.55    0.25
  -8  -5   8    4.63    0.41
   8   5  -8    4.13    0.40
  -8   5   8    4.51    0.26
   8   5  -8    4.74    0.38
   7  -5  -8    1.53    0.15
  -7  -5   8    1.32    0.22
  -7   5   8    1.42    0.14
   7   5  -8    1.54    0.38
   7   5  -8    1.64    0.24
  -6  -5   8    1.34    0.21
   6  -5  -8    1.35    0.15
  -6   5   8    1.47    0.14
   6   5  -8    1.19    0.23
   6   5  -8    1.08    0.22
   5  -5  -8    0.03    0.14
  -5  -5   8   -0.23    0.24
   5   5  -8    0.18    0.20
   5   5  -8    0.25    0.19
  -5   5   8   -0.05    0.13
  -4  -5   8    3.31    0.28
   4  -5  -8    2.50    0.26
  -4   5   8    2.42    0.26
   4   5  -8    2.88    0.24
   4   5  -8    2.33    0.23
   3  -5  -8   10.45    0.40
  -3  -5   8   10.17    0.42
   3   5  -8   11.01    0.46
   3   5  -8   10.43    0.44
  -3   5   8   10.32    0.38
  -2  -5   8    7.93    0.36
   2  -5  -8    7.62    0.36
   2   5  -8    7.79    0.39
  -2   5   8    8.35    0.35
   2   5  -8    7.60    0.37
   1  -5  -8    2.04    0.19
  -1  -5   8    1.92    0.17
   1   5  -8    2.03    0.20
  -1   5   8    2.05    0.18
   1   5  -8    1.78    0.19
   0  -5  -8   11.01    0.43
   0  -5   8   11.33    0.40
   0   5  -8   11.46    0.42
   0   5  -8   10.85    0.41
   0   5   8   11.42    0.42
  -1  -5  -8    0.27    0.17
   1  -5   8    0.24    0.15
   1   5   8    0.12    0.15
  -1   5  -8    0.26    0.15
  -1   5  -8    0.24    0.15
   2  -5   8    5.66    0.29
  -2  -5  -8    6.08    0.37
   2   5   8    5.17    0.35
  -2   5  -8    5.60    0.30
  -2   5  -8    5.79    0.31
   3  -5   8    0.02    0.14
  -3  -5  -8   -0.07    0.20
  -3   5  -8    0.08    0.15
   3   5   8   -0.14    0.16
  -3   5  -8    0.18    0.15
   4  -5   8    1.84    0.16
  -4  -5  -8    1.44    0.22
  -4   5  -8    1.58    0.16
  -4   5  -8    1.55    0.16
   4   5   8    1.43    0.24
  -5  -5  -8    1.06    0.34
  -5   5  -8    2.19    0.23
  -5   5  -8    1.91    0.17
   5   5   8    2.30    0.24
  -6  -5  -8    3.93    0.38
   6  -5   8    3.96    0.24
   6   5   8    4.33    0.36
  -6   5  -8    3.90    0.24
  -6   5  -8    3.73    0.25
   7  -5   8    0.12    0.12
  -7  -5  -8    0.18    0.20
   7   5   8    0.52    0.20
  -7   5  -8    0.14    0.13
  -7   5  -8    0.37    0.17
   8  -5   8    9.69    0.33
  -8  -5  -8    9.66    0.49
   8   5   8    9.43    0.46
  -8   5  -8   10.24    0.33
  -8   5  -8    9.74    0.32
  -9  -5  -8    0.83    0.24
   9  -5   8    0.44    0.12
   9   5   8    0.35    0.20
  -9   5  -8    0.41    0.11
  -9   5  -8    0.44    0.10
  10  -5   8    4.22    0.21
 -10  -5  -8    3.18    0.28
  10   5   8    2.44    0.28
 -11  -5  -8    0.81    0.26
  11  -6  -8   -0.29    0.14
  11   6  -8    0.03    0.27
  10  -6  -8   -0.15    0.14
  10  -6  -8   -0.03    0.12
  10   6  -8    0.10    0.26
  -9  -6   8    1.11    0.24
   9  -6  -8    0.76    0.14
   9  -6  -8    0.58    0.15
   9   6  -8    0.71    0.27
   9   6  -8    0.89    0.23
  -9   6   8    0.66    0.10
  -8  -6   8    0.04    0.23
  -8  -6   8    0.15    0.21
   8   6  -8   -0.19    0.24
   8   6  -8    0.05    0.19
  -8   6   8    0.06    0.11
   7  -6  -8    4.91    0.26
  -7  -6   8    5.08    0.43
  -7  -6   8    5.42    0.42
   7   6  -8    5.07    0.44
  -7   6   8    5.00    0.26
   7   6  -8    4.91    0.40
  -6  -6   8   25.64    0.78
  -6  -6   8   24.97    0.80
   6  -6  -8   25.18    0.71
   6   6  -8   26.27    0.79
  -6   6   8   26.05    0.69
   6   6  -8   26.16    0.79
   5  -6  -8    0.04    0.15
  -5  -6   8   -0.08    0.19
   5   6  -8    0.06    0.20
  -5   6   8    0.22    0.13
   5   6  -8    0.02    0.20
   4  -6  -8    0.30    0.16
  -4  -6   8   -0.23    0.18
   4   6  -8    0.04    0.27
   4   6  -8    0.40    0.20
  -4   6   8    0.27    0.14
  -3  -6   8    6.58    0.39
   3  -6  -8    7.16    0.35
   3   6  -8    6.31    0.43
   3   6  -8    7.33    0.41
  -3   6   8    6.52    0.33
  -2  -6   8   13.76    0.48
   2  -6  -8   13.61    0.48
  -2   6   8   13.16    0.46
   2   6  -8   13.78    0.51
   2   6  -8   14.09    0.50
   1  -6  -8    0.55    0.18
  -1  -6   8    0.16    0.15
  -1   6   8    0.43    0.16
   1   6  -8    0.18    0.17
   1   6  -8   -0.01    0.18
   0  -6   8    0.23    0.16
   0  -6  -8   -0.05    0.18
   0   6  -8    0.05    0.17
   0   6  -8    0.21    0.17
   0   6   8    0.21    0.16
  -1  -6  -8    0.06    0.18
   1  -6   8   -0.04    0.14
  -1   6  -8    0.06    0.17
  -1   6  -8   -0.05    0.15
   1   6   8   -0.02    0.17
   2  -6   8    4.14    0.28
  -2  -6  -8    4.27    0.37
  -2   6  -8    3.56    0.30
   2   6   8    3.69    0.35
  -2   6  -8    3.75    0.29
   3  -6   8    2.16    0.18
  -3  -6  -8    2.42    0.25
  -3   6  -8    2.29    0.19
   3   6   8    1.80    0.21
  -3   6  -8    2.49    0.26
   4  -6   8   34.46    0.92
  -4  -6  -8   34.29    1.02
  -4   6  -8   35.25    0.93
   4   6   8   36.08    0.99
  -4   6  -8   35.78    0.93
   5  -6   8    3.75    0.26
  -5  -6  -8    3.95    0.39
  -5   6  -8    3.88    0.24
   5   6   8    3.98    0.36
  -5   6  -8    4.12    0.27
   6  -6   8    2.29    0.22
  -6  -6  -8    2.07    0.24
  -6   6  -8    2.31    0.23
  -6   6  -8    2.13    0.23
   6   6   8    2.38    0.25
  -7  -6  -8    0.89    0.23
   7  -6   8    0.84    0.13
  -7   6  -8    0.81    0.13
  -7   6  -8    0.62    0.13
   7   6   8    0.56    0.21
  -8  -6  -8    4.52    0.45
   8  -6   8    4.30    0.23
   8   6   8    3.88    0.39
  -8   6  -8    3.88    0.20
  -8   6  -8    3.99    0.20
  -9  -6  -8    4.14    0.44
   9  -6   8    3.72    0.21
   9   6   8    3.70    0.40
 -10  -6  -8    0.14    0.23
 -10  -7   8    0.24    0.27
  10  -7  -8    0.60    0.13
  10   7  -8    0.90    0.30
  -9  -7   8    0.70    0.28
   9  -7  -8    0.63    0.14
   9  -7  -8    0.77    0.12
   9   7  -8    0.38    0.27
   9   7  -8    0.95    0.27
  -8  -7   8    1.28    0.28
  -8  -7   8    1.78    0.25
   8   7  -8    1.37    0.25
  -8   7   8    1.60    0.17
   8   7  -8    1.29    0.28
  -7  -7   8   27.53    0.87
  -7  -7   8   27.43    0.85
   7  -7  -8   26.81    0.73
   7   7  -8   28.48    0.86
   7   7  -8   26.27    0.84
  -6  -7   8   33.80    1.01
  -6  -7   8   34.72    0.98
   6  -7  -8   33.45    0.90
  -6   7   8   34.08    0.89
   6   7  -8   33.05    0.99
   6   7  -8   35.37    0.99
   5  -7  -8    0.04    0.14
  -5  -7   8   -0.11    0.23
  -5  -7   8   -0.10    0.20
   5   7  -8    0.08    0.21
  -5   7   8    0.13    0.13
   5   7  -8   -0.34    0.20
  -4  -7   8    3.47    0.35
   4  -7  -8    3.01    0.29
  -4   7   8    3.36    0.26
   4   7  -8    3.28    0.36
   4   7  -8    3.20    0.28
  -3  -7   8    4.42    0.36
   3  -7  -8    4.59    0.32
  -3   7   8    4.22    0.29
   3   7  -8    4.66    0.37
   2  -7  -8    0.19    0.17
  -2  -7   8    0.40    0.17
  -2   7   8    0.13    0.15
   2   7  -8    0.32    0.19
   2   7  -8    0.25    0.18
   1  -7  -8   -0.01    0.18
  -1  -7   8    0.19    0.17
   1   7  -8   -0.04    0.19
  -1   7   8    0.35    0.17
   1   7  -8    0.12    0.19
   0  -7  -8    6.54    0.39
   0  -7   8    6.88    0.36
   0   7  -8    6.49    0.36
   0   7  -8    6.20    0.37
   0   7   8    6.35    0.37
  -1  -7  -8    0.30    0.20
   1  -7   8    0.08    0.15
  -1   7  -8    0.19    0.17
   1   7   8    0.09    0.18
  -1   7  -8   -0.03    0.17
  -2  -7  -8   23.06    0.72
   2  -7   8   23.16    0.66
  -2   7  -8   21.30    0.67
   2   7   8   22.82    0.70
  -2   7  -8   22.65    0.66
   3  -7   8  114.41    2.76
  -3  -7  -8  113.06    2.80
   3   7   8  113.25    2.79
  -3   7  -8  112.93    2.76
  -3   7  -8  103.03    2.78
  -4  -7  -8    5.26    0.42
   4  -7   8    4.67    0.29
   4   7   8    4.66    0.39
  -4   7  -8    5.15    0.28
   5  -7   8    0.29    0.14
  -5  -7  -8   -0.01    0.21
   5   7   8    0.07    0.19
  -5   7  -8   -0.07    0.13
   6  -7   8    0.34    0.13
  -6  -7  -8    0.24    0.23
   6   7   8    0.22    0.21
  -6   7  -8   -0.09    0.13
  -6   7  -8    0.17    0.16
   7  -7   8    2.17    0.22
  -7  -7  -8    2.03    0.26
   7   7   8    2.77    0.26
  -7   7  -8    2.52    0.21
  -7   7  -8    2.48    0.20
   8  -7   8    0.14    0.12
  -8  -7  -8    0.31    0.23
   8   7   8    0.19    0.21
   9  -7   8    0.52    0.11
  -9  -7  -8    0.88    0.28
   9  -8  -8    3.46    0.25
  -9  -8   8    2.98    0.33
   9   8  -8    3.17    0.33
  -8  -8   8    2.84    0.33
   8  -8  -8    3.38    0.24
  -8   8   8    3.07    0.18
   8   8  -8    3.69    0.33
   8   8  -8    2.80    0.27
  -7  -8   8    1.79    0.25
   7  -8  -8    1.25    0.15
  -7  -8   8    0.71    0.28
   7   8  -8    1.12    0.27
  -7   8   8    1.16    0.14
   7   8  -8    2.11    0.27
   6  -8  -8    0.09    0.13
  -6  -8   8    0.37    0.22
  -6  -8   8    0.00    0.25
   6   8  -8    0.01    0.21
  -6   8   8    0.34    0.14
   6   8  -8    0.17    0.24
  -5  -8   8    2.82    0.30
   5  -8  -8    2.68    0.26
  -5  -8   8    2.85    0.26
  -5   8   8    2.52    0.25
   5   8  -8    2.65    0.26
   5   8  -8    2.50    0.26
  -4  -8   8    1.03    0.21
   4  -8  -8    1.04    0.17
  -4  -8   8    0.94    0.26
   4   8  -8    0.87    0.23
  -4   8   8    1.16    0.16
   4   8  -8    0.93    0.25
  -3  -8   8    0.26    0.19
   3  -8  -8    0.53    0.17
  -3  -8   8    0.71    0.25
  -3   8   8    0.76    0.16
   3   8  -8    0.74    0.24
   3   8  -8    0.66    0.21
   2  -8  -8    2.57    0.22
  -2  -8   8    2.50    0.22
  -2   8   8    2.16    0.20
   2   8  -8    2.20    0.22
   2   8  -8    2.61    0.25
   1  -8  -8    2.68    0.24
  -1  -8   8    3.29    0.32
   1   8  -8    3.05    0.34
   1   8  -8    2.98    0.24
  -1   8   8    2.83    0.31
   0  -8  -8    1.70    0.22
   0  -8   8    1.55    0.19
   0   8   8    1.45    0.20
   0   8  -8    1.35    0.20
   0   8  -8    1.78    0.21
   1  -8   8    2.09    0.20
  -1  -8  -8    1.55    0.23
   1   8   8    1.61    0.21
  -1   8  -8    2.25    0.21
  -1   8  -8    1.90    0.20
   2  -8   8    0.67    0.17
  -2  -8  -8    0.83    0.21
  -2   8  -8    0.75    0.17
  -2   8  -8    0.90    0.17
   3  -8   8   13.16    0.46
  -3  -8  -8   11.83    0.56
  -3   8  -8   14.05    0.46
   3   8   8   14.50    0.56
  -3   8  -8   13.11    0.46
   4  -8   8    2.55    0.27
  -4  -8  -8    2.15    0.27
  -4   8  -8    2.02    0.18
  -4   8  -8    2.19    0.19
   4   8   8    2.02    0.27
  -5  -8  -8    0.95    0.25
   5  -8   8    0.72    0.15
   5   8   8    0.45    0.23
  -5   8  -8    0.98    0.15
  -5   8  -8    0.97    0.15
  -6  -8  -8    0.31    0.26
   6  -8   8    0.11    0.13
  -6   8  -8    0.17    0.13
   6   8   8    0.31    0.23
  -6   8  -8    0.00    0.13
   7  -8   8    0.82    0.13
  -7  -8  -8    0.48    0.26
  -7   8  -8    0.87    0.12
   7   8   8    0.78    0.22
  -7   8  -8    0.79    0.12
  -8  -8  -8    3.20    0.33
   8  -8   8    2.25    0.20
   8   8   8    2.23    0.29
  -9  -8  -8    0.84    0.28
  -8  -9   8    0.60    0.30
   8   9  -8    0.42    0.26
  -7  -9   8    1.20    0.30
   7   9  -8    1.18    0.27
   7   9  -8    1.26    0.25
  -7   9   8    0.91    0.12
  -6  -9   8    0.35    0.21
   6  -9  -8    0.33    0.14
  -6  -9   8    0.42    0.28
   6   9  -8    0.65    0.24
  -6   9   8    0.43    0.17
   6   9  -8    0.25    0.23
  -5  -9   8    0.64    0.21
  -5  -9   8    0.70    0.27
   5  -9  -8    0.40    0.15
   5   9  -8    0.63    0.25
   5   9  -8    0.76    0.23
  -5   9   8    0.54    0.14
  -4  -9   8    4.59    0.36
   4  -9  -8    4.44    0.30
  -4  -9   8    4.56    0.49
  -4   9   8    4.20    0.29
   4   9  -8    3.74    0.30
   4   9  -8    4.61    0.41
   3  -9  -8    2.98    0.31
  -3  -9   8    3.11    0.35
  -3  -9   8    3.27    0.32
   3   9  -8    3.23    0.29
  -3   9   8    3.27    0.30
   3   9  -8    2.74    0.26
   2  -9  -8   14.91    0.54
  -2  -9   8   14.71    0.54
  -2   9   8   15.04    0.52
   2   9  -8   14.79    0.58
   2   9  -8   15.70    0.56
   1  -9  -8    1.16    0.22
  -1  -9   8    0.99    0.19
  -1   9   8    1.21    0.19
   1   9  -8    1.20    0.22
   1   9  -8    1.02    0.22
   0  -9  -8   10.16    0.48
   0  -9   8   10.47    0.43
   0   9   8    9.72    0.45
   0   9  -8   10.28    0.45
   0   9  -8   10.71    0.45
  -1  -9  -8    1.43    0.24
   1  -9   8    1.42    0.19
  -1   9  -8    1.47    0.20
   1   9   8    1.29    0.22
  -1   9  -8    1.54    0.21
   2  -9   8    9.04    0.38
  -2   9  -8    8.90    0.40
  -2   9  -8    8.63    0.40
   2   9   8    8.79    0.47
   3  -9   8    6.38    0.35
  -3  -9  -8    6.27    0.49
  -3   9  -8    6.65    0.35
  -3   9  -8    6.36    0.35
   3   9   8    6.75    0.45
   4  -9   8    1.30    0.17
  -4  -9  -8    1.13    0.27
   4   9   8    1.48    0.25
  -4   9  -8    1.54    0.18
  -4   9  -8    1.02    0.16
  -5  -9  -8   12.59    0.60
   5  -9   8   11.92    0.43
  -5   9  -8   12.58    0.43
  -5   9  -8   13.08    0.43
   5   9   8   12.98    0.57
   6  -9   8   -0.07    0.13
  -6  -9  -8    0.31    0.26
  -6   9  -8   -0.01    0.13
   6   9   8   -0.17    0.22
  -6   9  -8   -0.05    0.12
   7  -9   8    2.77    0.23
  -7  -9  -8    3.04    0.35
   7   9   8    2.71    0.26
  -8  -9  -8    6.54    0.53
  -7 -10   8    7.36    0.59
  -7  10   8    6.40    0.28
   7  10  -8    6.85    0.53
  -6 -10   8    0.05    0.30
   6 -10  -8    0.15    0.19
   6  10  -8    0.21    0.24
   6  10  -8    0.22    0.26
  -6  10   8    0.40    0.24
  -5 -10   8    3.11    0.34
   5 -10  -8    2.93    0.28
  -5  10   8    3.67    0.32
   5  10  -8    2.54    0.30
   5  10  -8    2.43    0.27
   4 -10  -8    2.33    0.20
  -4 -10   8    2.54    0.32
  -4 -10   8    2.79    0.26
   4  10  -8    2.89    0.29
  -4  10   8    2.64    0.22
   4  10  -8    1.89    0.26
  -3 -10   8    1.89    0.23
   3 -10  -8    1.61    0.21
  -3 -10   8    2.21    0.31
   3  10  -8    1.87    0.25
   3  10  -8    2.19    0.26
  -3  10   8    2.15    0.21
   2 -10  -8   31.86    0.91
  -2 -10   8   30.74    0.92
  -2  10   8   31.54    0.90
   2  10  -8   31.88    0.95
   2  10  -8   32.67    0.94
  -1 -10   8    2.51    0.24
   1 -10  -8    3.14    0.27
   1  10  -8    2.95    0.30
  -1  10   8    3.29    0.34
   1  10  -8    2.70    0.25
   0 -10   8    4.02    0.33
   0 -10  -8    3.82    0.30
   0  10  -8    3.78    0.38
   0  10   8    3.93    0.37
   0  10  -8    4.45    0.38
  -1 -10  -8    0.97    0.32
   1 -10   8    0.55    0.19
  -1  10  -8    0.74    0.20
  -1  10  -8    0.56    0.20
   1  10   8    0.34    0.23
   2 -10   8    3.33    0.31
  -2 -10  -8    3.37    0.31
  -2  10  -8    3.48    0.33
  -2  10  -8    2.90    0.31
   2  10   8    4.12    0.39
  -3 -10  -8    4.95    0.50
   3 -10   8    6.42    0.35
   3  10   8    6.01    0.44
  -3  10  -8    5.40    0.37
  -3  10  -8    5.91    0.35
  -4 -10  -8    1.15    0.29
   4 -10   8    0.69    0.14
  -4  10  -8    1.10    0.20
   4  10   8    0.54    0.25
  -4  10  -8    0.76    0.18
   5 -10   8    2.32    0.19
  -5 -10  -8    1.80    0.30
   5  10   8    2.01    0.26
  -5  10  -8    2.35    0.19
  -5  10  -8    2.14    0.23
  -6 -10  -8    0.95    0.30
  -6  10  -8    0.80    0.15
   6  10   8    0.40    0.22
  -7 -10  -8    4.29    0.40
  -5 -11   8    1.74    0.35
  -5  11   8    1.47    0.19
   5  11  -8    1.71    0.29
   4 -11  -8    5.24    0.35
  -4 -11   8    5.04    0.55
   4  11  -8    4.30    0.47
   4  11  -8    3.77    0.33
   3 -11  -8    3.91    0.37
  -3 -11   8    4.44    0.37
   3  11  -8    4.24    0.32
   3  11  -8    3.87    0.43
  -3  11   8    3.92    0.41
   2 -11  -8    0.17    0.21
   2  11  -8   -0.17    0.22
   2  11  -8    0.31    0.26
  -2  11   8   -0.21    0.21
   1 -11  -8    2.24    0.26
   1  11  -8    2.70    0.27
   1  11  -8    2.37    0.26
  -1  11   8    3.50    0.36
   0 -11  -8   -0.04    0.24
   0  11  -8    0.24    0.21
   0  11  -8    0.30    0.22
  -1 -11  -8    0.23    0.24
   1  11   8   -0.68    0.22
  -1  11  -8    0.33    0.23
  -1  11  -8    0.19    0.20
  -2 -11  -8    2.22    0.30
  -2  11  -8    1.99    0.22
  -2  11  -8    1.84    0.25
   2  11   8    1.42    0.24
  -3 -11  -8    5.11    0.52
  -3  11  -8    4.94    0.45
   3  11   8    4.89    0.44
  -3  11  -8    5.05    0.34
  -4 -11  -8    0.18    0.32
  -4  11  -8    0.40    0.17
   4  11   8    0.41    0.23
  -5 -11  -8    0.48    0.31
   5  11   8    0.42    0.25
  -5  11  -8    0.81    0.17
   1 -12  -8   -0.05    0.27
  -1  12   8    0.75    0.43
  -1  12   8    0.28    0.22
   1  12  -8    0.69    0.33
   0 -12  -8    0.01    0.28
   0  12   8    0.43    0.30
   0  12  -8   -0.11    0.26
  -1 -12  -8    4.32    0.37
   1  12   8    5.35    0.52
  -1  12  -8    3.85    0.39
  12   0  -9   -0.01    0.24
  12   0  -9   -0.05    0.19
 -11   0   9   -0.01    0.17
  11   0  -9   -0.25    0.17
  11   0  -9   -0.17    0.17
  10   0  -9   -0.04    0.17
  10   0  -9   -0.32    0.17
 -10   0   9   -0.01    0.16
  -9   0   9    0.25    0.16
   9   0  -9    0.12    0.18
   9   0  -9    0.12    0.18
   8   0  -9    0.16    0.18
   8   0  -9   -0.16    0.17
  -8   0   9    0.02    0.16
   7   0  -9   -0.24    0.17
  -7   0   9   -0.20    0.16
   7   0  -9   -0.19    0.16
  -6   0   9    0.05    0.15
   6   0  -9   -0.03    0.16
   6   0  -9    0.20    0.17
  -5   0   9   -0.03    0.15
   5   0  -9   -0.05    0.16
   5   0  -9    0.05    0.16
  -4   0   9   -0.22    0.14
   4   0  -9   -0.35    0.16
  -3   0   9    0.13    0.15
   3   0  -9   -0.16    0.15
  -2   0   9    0.29    0.15
   2   0  -9    0.15    0.13
   1   0  -9   -0.10    0.15
  -1   0   9   -0.12    0.14
   0   0   9    0.02    0.13
   0   0  -9    0.02    0.15
   1   0   9    0.11    0.14
  -1   0  -9    0.02    0.15
   2   0   9    0.08    0.14
  -2   0  -9   -0.20    0.15
  -3   0  -9    0.05    0.15
   3   0   9    0.01    0.15
   4   0   9    0.04    0.15
  -4   0  -9   -0.01    0.16
   5   0   9    0.03    0.16
  -5   0  -9    0.01    0.16
   6   0   9    0.11    0.15
  -6   0  -9   -0.05    0.16
  -7   0  -9    0.21    0.17
   7   0   9    0.29    0.17
  -8   0  -9    0.05    0.17
   8   0   9    0.03    0.17
  -9   0  -9   -0.07    0.18
   9   0   9    0.20    0.15
  10   0   9   -0.10    0.17
 -10   0  -9   -0.33    0.18
 -11   0  -9   -0.08    0.19
  11   0   9   -0.30    0.15
 -12   0  -9   -0.02    0.20
  12   0   9    0.55    0.25
  12  -1  -9   15.85    0.56
  12  -1  -9   13.32    0.53
  12   1  -9   15.22    0.57
  11  -1  -9    0.29    0.17
  11  -1  -9    0.41    0.18
 -11  -1   9    0.16    0.17
  11   1  -9    0.59    0.21
 -11   1   9    0.09    0.17
  11   1  -9    0.55    0.20
  10  -1  -9    1.52    0.19
  10  -1  -9    1.43    0.21
 -10  -1   9    1.30    0.20
 -10   1   9    1.45    0.18
  10   1  -9    1.34    0.21
  10   1  -9    1.25    0.21
  -9  -1   9    0.36    0.16
   9  -1  -9    0.37    0.17
  -9   1   9    0.31    0.15
   9   1  -9    0.38    0.20
   9   1  -9    0.27    0.18
   8  -1  -9    2.25    0.21
  -8  -1   9    2.37    0.21
   8  -1  -9    2.83    0.29
  -8   1   9    2.54    0.27
   8   1  -9    2.34    0.22
   8   1  -9    2.35    0.22
  -7  -1   9    2.45    0.21
   7  -1  -9    2.28    0.21
   7  -1  -9    2.08    0.20
  -7   1   9    2.13    0.19
   7   1  -9    2.00    0.20
   7   1  -9    2.92    0.32
  -6  -1   9   29.05    0.82
   6  -1  -9   30.23    0.82
   6  -1  -9   28.96    0.81
   6   1  -9   28.74    0.83
  -6   1   9   28.78    0.80
   6   1  -9   29.69    0.83
  -5  -1   9    0.71    0.16
   5  -1  -9    0.43    0.16
  -5   1   9    0.68    0.15
   5   1  -9    0.65    0.21
   5   1  -9    0.39    0.17
  -4  -1   9    1.99    0.17
   4  -1  -9    2.45    0.19
   4   1  -9    2.28    0.20
  -4   1   9    2.43    0.19
   4   1  -9    2.13    0.19
   3  -1  -9  189.82    4.59
  -3  -1   9  184.24    4.59
   3   1  -9  193.56    4.60
  -3   1   9  183.84    4.59
  -2  -1   9   12.15    0.42
   2  -1  -9   11.80    0.43
  -2   1   9   12.57    0.42
   2   1  -9   12.87    0.44
   1  -1  -9    4.22    0.29
  -1  -1   9    4.59    0.28
   1   1  -9    4.75    0.28
  -1   1   9    4.18    0.28
   0  -1  -9    4.88    0.31
   0  -1   9    5.21    0.28
   0   1   9    5.15    0.29
   0   1  -9    5.34    0.29
  -1  -1  -9   -0.18    0.15
   1  -1   9    0.18    0.13
   1   1   9    0.07    0.13
  -1   1  -9   -0.01    0.14
  -2  -1  -9   17.66    0.55
   2  -1   9   17.71    0.53
   2   1   9   17.50    0.54
  -2   1  -9   17.79    0.54
   3  -1   9    6.85    0.32
  -3  -1  -9    6.96    0.35
  -3   1  -9    7.26    0.33
   3   1   9    7.37    0.34
  -4  -1  -9    8.80    0.38
   4  -1   9    9.16    0.36
  -4   1  -9    9.33    0.37
   4   1   9    9.37    0.37
  -5  -1  -9    1.19    0.18
   5  -1   9    1.08    0.16
  -5   1  -9    1.35    0.18
   6  -1   9   30.90    0.84
  -6  -1  -9   29.33    0.86
   6   1   9   31.85    0.85
  -6   1  -9   30.15    0.84
   7  -1   9   37.71    0.96
  -7  -1  -9   37.58    0.98
  -7   1  -9   29.75    1.09
   7   1   9   37.05    0.98
  -8  -1  -9    0.07    0.19
   8  -1   9    0.05    0.15
   8   1   9    0.15    0.18
  -8   1  -9    0.09    0.17
  -9  -1  -9    0.30    0.20
   9  -1   9    0.39    0.16
  -9   1  -9    0.27    0.18
   9   1   9    0.32    0.18
  10  -1   9    0.20    0.17
 -10  -1  -9    0.51    0.20
  10   1   9    0.66    0.18
 -10   1  -9    0.43    0.18
 -11  -1  -9    0.36    0.20
  11  -1   9   -0.28    0.14
 -11   1  -9   -0.15    0.17
  11   1   9   -0.16    0.21
 -12  -1  -9    0.71    0.23
  12  -1   9    0.09    0.15
 -12   1  -9    0.01    0.19
  12  -2  -9    4.74    0.29
  12   2  -9    4.64    0.44
  11  -2  -9    3.95    0.29
  11  -2  -9    3.80    0.30
 -11  -2   9    4.02    0.36
  11   2  -9    3.32    0.28
  11   2  -9    3.74    0.38
 -11   2   9    4.18    0.30
 -10  -2   9    3.07    0.25
  10  -2  -9    2.80    0.27
  10  -2  -9    3.11    0.31
 -10   2   9    3.37    0.26
  10   2  -9    3.55    0.37
  10   2  -9    3.38    0.26
   9  -2  -9    2.29    0.20
  -9  -2   9    2.06    0.20
   9  -2  -9    2.18    0.19
  -9   2   9    2.35    0.26
   9   2  -9    2.17    0.23
   9   2  -9    1.78    0.22
   8  -2  -9   17.25    0.54
  -8  -2   9   16.49    0.56
   8  -2  -9   16.83    0.53
   8   2  -9   17.16    0.58
  -8   2   9   16.82    0.52
   8   2  -9   17.73    0.58
   7  -2  -9   18.45    0.56
  -7  -2   9   17.07    0.58
   7  -2  -9   17.64    0.54
   7   2  -9   16.81    0.58
   7   2  -9   17.29    0.59
  -7   2   9   17.63    0.53
   6  -2  -9    0.76    0.17
  -6  -2   9    1.11    0.19
  -6   2   9    0.82    0.15
   6   2  -9    0.91    0.20
   6   2  -9    0.80    0.19
   5  -2  -9   22.79    0.67
  -5  -2   9   24.41    0.69
  -5   2   9   23.83    0.67
   5   2  -9   22.51    0.76
   5   2  -9   23.91    0.70
  -4  -2   9    0.11    0.16
   4  -2  -9    0.10    0.15
   4   2  -9   -0.04    0.17
  -4   2   9   -0.16    0.14
   4   2  -9   -0.25    0.15
   3  -2  -9   17.44    0.53
  -3  -2   9   16.91    0.54
   3   2  -9   17.09    0.54
  -3   2   9   16.67    0.52
   3   2  -9   17.41    0.55
  -2  -2   9   35.07    0.92
   2  -2  -9   34.98    0.93
   2   2  -9   34.32    0.93
  -2   2   9   34.36    0.92
  -1  -2   9   15.09    0.48
   1  -2  -9   14.79    0.48
   1   2  -9   14.90    0.48
  -1   2   9   14.65    0.48
   0  -2  -9    3.39    0.29
   0  -2   9    3.30    0.26
   0   2  -9    3.26    0.26
   0   2   9    3.07    0.27
  -1  -2  -9   32.44    0.87
   1  -2   9   32.46    0.86
  -1   2  -9   32.06    0.86
   1   2   9   31.79    0.87
   2  -2   9   25.79    0.70
  -2  -2  -9   24.90    0.72
  -2   2  -9   26.38    0.71
   2   2   9   24.28    0.71
   3  -2   9   -0.15    0.13
  -3  -2  -9    0.07    0.16
   3   2   9   -0.17    0.15
  -3   2  -9    0.07    0.15
   4  -2   9    3.66    0.27
  -4  -2  -9    4.60    0.33
   4   2   9    4.49    0.31
  -4   2  -9    3.92    0.30
   5  -2   9    6.79    0.36
  -5  -2  -9    7.26    0.38
  -5   2  -9    7.57    0.34
   5   2   9    7.78    0.37
  -6  -2  -9    1.18    0.23
   6  -2   9    1.51    0.17
   6   2   9    1.48    0.20
  -6   2  -9    1.26    0.17
  -7  -2  -9    3.97    0.34
   7  -2   9    3.15    0.27
   7   2   9    3.58    0.32
  -7   2  -9    3.26    0.25
  -8  -2  -9    2.16    0.23
   8  -2   9    2.63    0.27
  -8   2  -9    2.28    0.19
   8   2   9    2.17    0.20
   9  -2   9    2.58    0.19
  -9  -2  -9    2.46    0.24
   9   2   9    2.16    0.21
  -9   2  -9    2.10    0.20
  10  -2   9    2.02    0.18
 -10  -2  -9    1.82    0.24
  10   2   9    2.03    0.22
 -10   2  -9    2.28    0.20
 -11  -2  -9    5.00    0.41
  11  -2   9    5.18    0.29
  11   2   9    4.72    0.40
 -11   2  -9    5.14    0.32
  12  -2   9   -0.31    0.15
 -12  -2  -9   -0.18    0.22
 -12   2  -9    0.35    0.17
  12  -3  -9    0.56    0.16
  12   3  -9    0.96    0.45
  11  -3  -9    0.61    0.14
  11  -3  -9    0.88    0.18
 -11  -3   9    1.02    0.31
 -11   3   9    0.58    0.17
  11   3  -9    0.59    0.25
 -10  -3   9    1.64    0.22
  10  -3  -9    1.84    0.16
  10  -3  -9    2.11    0.19
  10   3  -9    1.34    0.23
 -10   3   9    1.47    0.16
  10   3  -9    1.71    0.26
   9  -3  -9    0.10    0.17
   9  -3  -9    0.06    0.14
  -9  -3   9   -0.18    0.20
   9   3  -9    0.05    0.19
  -9   3   9   -0.18    0.14
   9   3  -9    0.18    0.22
   8  -3  -9   15.91    0.50
   8  -3  -9   16.75    0.52
  -8  -3   9   15.13    0.55
  -8   3   9   15.97    0.49
   8   3  -9   16.37    0.58
   8   3  -9   14.95    0.56
  -7  -3   9    4.30    0.36
   7  -3  -9    3.78    0.29
   7  -3  -9    3.86    0.29
  -7   3   9    4.09    0.27
   7   3  -9    3.83    0.36
   7   3  -9    3.89    0.36
  -6  -3   9    3.09    0.33
   6  -3  -9    3.24    0.28
  -6   3   9    2.87    0.26
   6   3  -9    3.22    0.35
   6   3  -9    3.75    0.36
  -5  -3   9    9.72    0.41
   5  -3  -9    9.28    0.38
   5   3  -9   10.03    0.44
  -5   3   9    9.64    0.37
   5   3  -9    9.30    0.42
  -4  -3   9   12.39    0.46
   4  -3  -9   12.55    0.44
   4   3  -9   13.43    0.48
   4   3  -9   11.81    0.47
  -4   3   9   12.37    0.42
  -3  -3   9    2.96    0.30
   3  -3  -9    3.32    0.29
   3   3  -9    3.08    0.30
  -3   3   9    3.26    0.27
   3   3  -9    3.11    0.31
  -2  -3   9    0.33    0.16
   2  -3  -9    0.40    0.17
  -2   3   9    0.10    0.14
   2   3  -9    0.53    0.18
   2   3  -9    0.20    0.16
   1  -3  -9    5.34    0.32
  -1  -3   9    5.34    0.31
   1   3  -9    5.77    0.32
  -1   3   9    5.90    0.31
   1   3  -9    5.70    0.33
   0  -3   9    2.01    0.17
   0  -3  -9    2.12    0.19
   0   3   9    2.79    0.27
   0   3  -9    2.50    0.27
  -1  -3  -9    3.28    0.30
   1  -3   9    3.25    0.25
   1   3   9    3.17    0.29
  -1   3  -9    2.87    0.27
   2  -3   9   20.25    0.60
  -2  -3  -9   21.01    0.63
   2   3   9   21.14    0.62
  -2   3  -9   21.07    0.61
  -3  -3  -9    4.62    0.35
   3  -3   9    5.01    0.29
   3   3   9    5.83    0.33
  -3   3  -9    5.10    0.30
  -4  -3  -9    3.32    0.33
   4  -3   9    3.16    0.26
  -4   3  -9    3.11    0.28
   4   3   9    3.01    0.27
   5  -3   9    1.11    0.28
  -5  -3  -9    1.31    0.20
   5   3   9    1.18    0.19
  -5   3  -9    1.21    0.17
   6  -3   9    2.27    0.17
  -6  -3  -9    2.08    0.23
   6   3   9    2.41    0.22
  -6   3  -9    2.27    0.18
   7  -3   9    1.52    0.17
  -7  -3  -9    1.55    0.22
   7   3   9    1.77    0.21
  -7   3  -9    1.33    0.17
  -8  -3  -9    1.07    0.21
   8  -3   9    0.85    0.15
   8   3   9    1.03    0.19
  -8   3  -9    1.11    0.17
   9  -3   9    2.37    0.23
  -9  -3  -9    2.13    0.25
  -9   3  -9    2.44    0.26
   9   3   9    1.87    0.21
  10  -3   9    0.86    0.14
 -10  -3  -9    0.89    0.24
 -10   3  -9    1.15    0.17
  10   3   9    1.40    0.23
 -11  -3  -9    0.37    0.24
  11  -3   9    0.09    0.14
 -11   3  -9    0.22    0.16
 -11  -4   9    3.54    0.38
  11  -4  -9    2.84    0.28
  11   4  -9    2.92    0.31
 -11   4   9    3.03    0.20
  10  -4  -9    0.35    0.12
 -10  -4   9    0.32    0.21
  10  -4  -9    0.21    0.15
  10   4  -9    0.16    0.24
 -10   4   9   -0.04    0.16
  10   4  -9    0.51    0.22
  -9  -4   9    0.03    0.21
   9  -4  -9    0.14    0.16
   9  -4  -9    0.02    0.13
  -9   4   9    0.09    0.14
   9   4  -9   -0.19    0.40
   9   4  -9    0.30    0.19
   8  -4  -9   -0.02    0.14
  -8  -4   9    0.06    0.20
   8  -4  -9    0.37    0.16
  -8   4   9    0.21    0.13
   8   4  -9    0.32    0.20
   8   4  -9    0.15    0.22
   7  -4  -9    0.03    0.15
   7   4  -9   -0.13    0.20
  -7   4   9    0.01    0.12
   7   4  -9   -0.09    0.20
  -6  -4   9    6.92    0.45
   6  -4  -9    7.08    0.34
  -6   4   9    7.09    0.31
   6   4  -9    7.11    0.42
   6   4  -9    7.22    0.42
  -5  -4   9   14.47    0.51
   5  -4  -9   14.42    0.47
   5   4  -9   13.39    0.52
  -5   4   9   13.82    0.45
   5   4  -9   13.63    0.53
  -4  -4   9    1.49    0.20
   4  -4  -9    1.59    0.18
   4   4  -9    1.28    0.35
  -4   4   9    1.66    0.17
   4   4  -9    1.56    0.22
   3  -4  -9    0.62    0.17
  -3  -4   9    0.51    0.18
   3   4  -9    0.61    0.19
  -3   4   9    0.26    0.15
   3   4  -9    0.61    0.19
   2  -4  -9   20.49    0.61
  -2  -4   9   19.90    0.61
   2   4  -9   20.28    0.63
   2   4  -9   19.77    0.62
  -2   4   9   20.65    0.60
   1  -4  -9    0.21    0.16
  -1  -4   9    0.05    0.15
  -1   4   9    0.05    0.16
   1   4  -9    0.18    0.17
   1   4  -9    0.00    0.17
   0  -4   9    3.83    0.28
   0  -4  -9    3.95    0.32
   0   4  -9    4.04    0.30
   0   4  -9    4.14    0.30
   0   4   9    3.87    0.30
   1  -4   9    0.19    0.14
  -1  -4  -9    0.01    0.17
   1   4   9    0.14    0.15
  -1   4  -9    0.14    0.16
  -1   4  -9   -0.04    0.15
   2  -4   9   11.67    0.41
  -2  -4  -9   12.73    0.47
   2   4   9   11.46    0.44
  -2   4  -9   11.87    0.42
  -2   4  -9   11.59    0.42
  -3  -4  -9   43.61    1.14
   3  -4   9   40.18    1.10
   3   4   9   41.89    1.13
  -3   4  -9   43.61    1.10
  -4  -4  -9   -0.02    0.19
   4   4   9    0.04    0.19
  -4   4  -9    0.00    0.15
  -5  -4  -9    8.12    0.50
   5  -4   9    8.44    0.34
   5   4   9    8.90    0.42
  -5   4  -9    8.81    0.36
   6  -4   9    3.21    0.25
  -6  -4  -9    3.40    0.38
   6   4   9    3.14    0.35
  -6   4  -9    2.96    0.26
   7  -4   9    1.86    0.16
  -7  -4  -9    1.61    0.23
   7   4   9    1.62    0.22
  -7   4  -9    1.81    0.20
  -8  -4  -9    1.06    0.24
   8  -4   9    1.09    0.14
  -8   4  -9    1.02    0.16
   8   4   9    1.04    0.20
   9  -4   9    1.60    0.16
  -9  -4  -9    1.51    0.25
   9   4   9    1.23    0.22
  -9   4  -9    2.22    0.24
 -10  -4  -9    1.28    0.27
  10  -4   9    1.10    0.15
  10   4   9    1.02    0.22
 -10   4  -9    1.08    0.15
  11  -4   9    0.16    0.13
 -11  -4  -9   -0.06    0.23
 -11   4  -9    0.06    0.11
 -11   4  -9   -0.06    0.12
  11  -5  -9    2.44    0.25
  11   5  -9    1.65    0.30
  10  -5  -9    2.38    0.19
 -10  -5   9    2.12    0.26
 -10   5   9    2.42    0.19
  10   5  -9    2.80    0.30
  -9  -5   9    0.72    0.23
   9  -5  -9    0.34    0.13
   9  -5  -9   -0.04    0.15
   9   5  -9    0.48    0.21
   9   5  -9    0.09    0.25
  -8  -5   9    0.56    0.24
   8  -5  -9    0.57    0.14
  -8   5   9    0.75    0.13
   8   5  -9    0.47    0.24
   8   5  -9    0.49    0.21
  -7  -5   9    8.64    0.47
   7  -5  -9    8.40    0.34
  -7   5   9    8.36    0.32
   7   5  -9    7.97    0.46
   7   5  -9    9.07    0.45
   6  -5  -9   37.48    0.97
  -6  -5   9   38.59    1.03
  -6   5   9   37.62    0.96
   6   5  -9   37.65    1.04
   6   5  -9   31.92    1.09
   5  -5  -9    0.05    0.15
  -5  -5   9   -0.08    0.20
   5   5  -9   -0.19    0.19
   5   5  -9    0.78    0.24
  -5   5   9   -0.03    0.14
  -4  -5   9    0.93    0.21
   4  -5  -9    1.05    0.17
   4   5  -9    0.86    0.21
  -4   5   9    1.19    0.16
   4   5  -9    0.73    0.22
   3  -5  -9   10.91    0.42
  -3  -5   9   11.10    0.45
   3   5  -9   10.96    0.46
   3   5  -9   11.16    0.48
  -3   5   9   11.19    0.41
  -2  -5   9    3.67    0.33
   2  -5  -9    4.22    0.33
   2   5  -9    4.35    0.34
  -2   5   9    4.06    0.31
   2   5  -9    4.58    0.35
  -1  -5   9   14.19    0.58
   1  -5  -9   16.04    0.54
   1   5  -9   16.90    0.55
   1   5  -9   15.92    0.53
  -1   5   9   16.67    0.52
   0  -5   9    0.62    0.20
   0  -5  -9    0.72    0.19
   0   5  -9    0.72    0.17
   0   5  -9    0.76    0.18
   0   5   9    0.77    0.18
  -1  -5  -9    2.00    0.22
   1  -5   9    1.61    0.20
  -1   5  -9    2.64    0.28
  -1   5  -9    2.05    0.19
   1   5   9    1.72    0.19
   2  -5   9   -0.06    0.15
  -2  -5  -9    0.09    0.19
  -2   5  -9    0.07    0.16
   2   5   9    0.02    0.17
  -2   5  -9    0.19    0.16
   3  -5   9   20.46    0.58
  -3  -5  -9   20.00    0.64
   3   5   9   17.82    0.68
  -3   5  -9   19.29    0.59
  -3   5  -9   19.69    0.58
   4  -5   9    2.08    0.17
  -4  -5  -9    1.65    0.24
   4   5   9    1.85    0.22
  -4   5  -9    2.14    0.19
  -4   5  -9    2.36    0.26
   5  -5   9    9.84    0.36
  -5  -5  -9    9.19    0.48
  -5   5  -9    9.59    0.37
   5   5   9    9.46    0.45
  -5   5  -9    9.54    0.36
  -6  -5  -9    3.76    0.38
   6  -5   9    2.97    0.25
   6   5   9    3.21    0.26
  -6   5  -9    3.14    0.26
  -6   5  -9    2.76    0.23
  -7  -5  -9    9.16    0.48
   7  -5   9    9.60    0.34
  -7   5  -9    8.96    0.35
   7   5   9    9.45    0.44
   8  -5   9    1.10    0.14
  -8  -5  -9    1.13    0.24
  -8   5  -9    1.04    0.18
   8   5   9    1.06    0.21
  -8   5  -9    0.94    0.18
  -9  -5  -9    0.70    0.25
   9  -5   9    0.36    0.13
   9   5   9    0.59    0.22
  -9   5  -9    0.43    0.15
  -9   5  -9    0.17    0.11
  10  -5   9    3.56    0.24
 -10  -5  -9    4.18    0.34
  11  -5   9    0.08    0.13
  10  -6  -9    0.25    0.15
  10   6  -9    0.08    0.25
 -10   6   9    0.43    0.10
  -9  -6   9    1.76    0.23
   9  -6  -9    1.77    0.17
  -9   6   9    1.43    0.13
   9   6  -9    1.62    0.25
   9   6  -9    1.85    0.29
   8  -6  -9    1.15    0.14
  -8  -6   9    1.02    0.25
   8   6  -9    0.80    0.22
   8   6  -9    1.00    0.25
  -8   6   9    0.86    0.15
  -7  -6   9    0.65    0.24
   7  -6  -9    0.49    0.14
  -7   6   9    0.32    0.13
   7   6  -9    0.74    0.24
   7   6  -9    0.64    0.25
   6  -6  -9    1.27    0.17
  -6  -6   9    1.67    0.24
   6   6  -9    1.49    0.24
   6   6  -9    1.37    0.24
  -6   6   9    1.24    0.15
   5  -6  -9    2.36    0.19
  -5  -6   9    2.21    0.23
  -5   6   9    2.16    0.17
   5   6  -9    1.70    0.24
   5   6  -9    2.48    0.26
   4  -6  -9   10.14    0.40
  -4  -6   9   10.18    0.46
   4   6  -9    9.87    0.46
   4   6  -9   10.03    0.47
  -4   6   9    9.78    0.38
   3  -6  -9    0.86    0.18
  -3  -6   9    0.73    0.18
  -3   6   9    0.79    0.16
   3   6  -9    0.53    0.20
   2  -6  -9   11.51    0.45
  -2  -6   9   11.06    0.45
   2   6  -9   10.65    0.46
   2   6  -9   11.75    0.48
  -2   6   9   10.90    0.43
  -1  -6   9    2.25    0.20
   1  -6  -9    2.00    0.21
   1   6  -9    2.15    0.22
  -1   6   9    1.88    0.20
   1   6  -9    1.37    0.25
   0  -6   9    4.49    0.31
   0  -6  -9    4.15    0.36
   0   6  -9    4.59    0.35
   0   6   9    5.25    0.35
  -1  -6  -9    1.75    0.23
   1  -6   9    1.68    0.18
   1   6   9    1.76    0.20
  -1   6  -9    2.07    0.21
  -2  -6  -9    2.90    0.26
   2  -6   9    2.57    0.20
  -2   6  -9    2.41    0.21
  -2   6  -9    1.77    0.32
   2   6   9    2.43    0.24
  -3  -6  -9   14.23    0.56
   3  -6   9   14.84    0.49
  -3   6  -9   14.89    0.49
   3   6   9   14.89    0.54
   4  -6   9    8.48    0.34
  -4  -6  -9    7.98    0.46
  -4   6  -9    8.43    0.35
   4   6   9    8.63    0.43
  -4   6  -9    6.59    0.51
   5  -6   9    1.00    0.15
  -5  -6  -9    1.22    0.24
  -5   6  -9    0.76    0.19
   5   6   9    1.10    0.22
  -5   6  -9    1.07    0.14
   6  -6   9    9.83    0.35
  -6  -6  -9   10.87    0.49
  -6   6  -9    8.72    0.37
   6   6   9    9.81    0.47
  -6   6  -9    9.33    0.36
  -7  -6  -9   11.11    0.52
   7  -6   9   10.38    0.36
  -7   6  -9   10.26    0.37
   7   6   9   10.51    0.49
  -7   6  -9   10.17    0.39
  -8  -6  -9    7.50    0.49
   8  -6   9    6.79    0.29
   8   6   9    7.46    0.44
  -8   6  -9    6.24    0.27
  -9  -6  -9    0.34    0.25
   9  -6   9    0.61    0.12
   9   6   9    0.91    0.29
  10  -6   9   -0.03    0.13
 -10  -6  -9   -0.64    0.26
  10  -7  -9    0.32    0.16
  10   7  -9   -0.12    0.27
   9  -7  -9    3.67    0.28
  -9  -7   9    4.94    0.43
   9  -7  -9    3.71    0.28
  -9   7   9    4.39    0.20
   9   7  -9    4.90    0.50
  -8  -7   9    6.60    0.47
   8  -7  -9    6.98    0.30
  -8   7   9    6.61    0.27
   8   7  -9    6.18    0.47
   8   7  -9    6.78    0.50
  -7  -7   9    3.47    0.30
   7  -7  -9    2.61    0.23
   7   7  -9    3.64    0.40
  -7   7   9    2.26    0.24
   7   7  -9    2.70    0.29
  -6  -7   9   -0.44    0.21
   6  -7  -9    0.05    0.15
   6   7  -9   -0.32    0.23
  -6   7   9    0.32    0.14
   6   7  -9    0.01    0.23
   5  -7  -9    1.84    0.17
  -5  -7   9    1.79    0.23
   5   7  -9    1.62    0.25
   5   7  -9    1.52    0.23
  -5   7   9    1.71    0.17
  -4  -7   9   10.48    0.47
   4  -7  -9   11.20    0.43
   4   7  -9   10.82    0.48
   4   7  -9   10.52    0.50
  -4   7   9   11.10    0.40
   3  -7  -9    1.14    0.19
  -3  -7   9    1.02    0.20
   3   7  -9    1.17    0.21
   3   7  -9    0.91    0.23
  -3   7   9    0.83    0.17
   2  -7  -9    0.60    0.19
  -2  -7   9    0.49    0.19
   2   7  -9    0.41    0.20
   2   7  -9    0.57    0.22
  -2   7   9    0.26    0.17
   1  -7  -9    3.07    0.34
  -1  -7   9    3.24    0.31
   1   7  -9    3.41    0.34
  -1   7   9    3.12    0.32
   1   7  -9    3.34    0.36
   0  -7   9    1.41    0.19
   0  -7  -9    1.73    0.22
   0   7  -9    1.59    0.21
   0   7  -9    1.21    0.19
   0   7   9    1.25    0.20
  -1  -7  -9   18.55    0.63
   1  -7   9   19.34    0.58
  -1   7  -9   17.81    0.59
   1   7   9   18.83    0.62
  -1   7  -9   18.47    0.60
  -2  -7  -9    1.30    0.25
   2  -7   9    1.45    0.19
  -2   7  -9    1.50    0.19
  -2   7  -9    1.93    0.20
   3  -7   9    3.55    0.28
  -3  -7  -9    3.47    0.46
  -3   7  -9    3.38    0.30
  -3   7  -9    3.99    0.30
   3   7   9    3.50    0.37
   4  -7   9   13.76    0.46
  -4  -7  -9   13.06    0.56
  -4   7  -9   13.77    0.46
   4   7   9   14.29    0.55
  -4   7  -9   13.52    0.46
  -5  -7  -9    1.10    0.26
   5  -7   9    0.97    0.15
   5   7   9    0.92    0.19
  -5   7  -9    0.73    0.16
  -5   7  -9    0.81    0.15
  -6  -7  -9   -0.05    0.23
   6  -7   9   -0.01    0.13
   6   7   9    0.51    0.20
  -6   7  -9    0.10    0.15
  -6   7  -9    0.16    0.14
  -7  -7  -9    3.21    0.32
   7  -7   9    3.14    0.24
   7   7   9    2.81    0.26
  -7   7  -9    2.88    0.24
  -7   7  -9    3.20    0.23
  -8  -7  -9    1.72    0.30
   8  -7   9    1.62    0.15
  -8   7  -9    1.55    0.13
   8   7   9    1.24    0.26
  -9  -7  -9    2.00    0.29
   9  -7   9    3.11    0.22
   9  -8  -9    0.51    0.16
   9   8  -9    0.50    0.29
  -8  -8   9   21.52    0.76
  -8   8   9   23.05    0.62
   8   8  -9   23.36    0.80
   8   8  -9   24.62    0.94
   7  -8  -9    1.47    0.16
  -7  -8   9    1.51    0.22
  -7   8   9    1.56    0.18
   7   8  -9    1.63    0.27
   7   8  -9    0.99    0.22
   6  -8  -9    1.53    0.16
  -6  -8   9    1.44    0.21
   6   8  -9    1.34    0.27
   6   8  -9    1.69    0.26
  -6   8   9    1.71    0.16
   5  -8  -9    2.72    0.28
  -5  -8   9    3.66    0.39
   5   8  -9    2.91    0.30
   5   8  -9    2.98    0.29
  -5   8   9    3.32    0.27
   4  -8  -9    1.42    0.18
  -4  -8   9    1.12    0.21
   4   8  -9    1.27    0.22
   4   8  -9    1.38    0.26
  -4   8   9    1.15    0.18
  -3  -8   9    4.05    0.35
   3  -8  -9    4.56    0.34
   3   8  -9    5.18    0.44
   3   8  -9    4.38    0.39
  -3   8   9    4.68    0.31
  -2  -8   9    5.42    0.36
   2  -8  -9    5.37    0.37
  -2   8   9    5.43    0.33
   2   8  -9    5.49    0.39
   2   8  -9    4.87    0.51
   1  -8  -9    0.67    0.20
  -1  -8   9    0.49    0.18
  -1   8   9    0.52    0.19
   1   8  -9    0.62    0.20
   1   8  -9    0.20    0.19
   0  -8  -9    2.09    0.25
   0  -8   9    2.00    0.21
   0   8  -9    2.22    0.22
   0   8   9    2.76    0.23
   0   8  -9    2.16    0.21
   1  -8   9   13.53    0.49
  -1  -8  -9   13.48    0.56
   1   8   9   13.87    0.52
  -1   8  -9   13.74    0.50
  -1   8  -9   13.72    0.50
   2  -8   9    5.92    0.34
  -2  -8  -9    5.74    0.54
  -2   8  -9    5.48    0.35
  -2   8  -9    5.58    0.35
   2   8   9    5.74    0.42
   3  -8   9    0.30    0.15
  -3  -8  -9    0.23    0.23
   3   8   9    0.01    0.23
  -3   8  -9    0.44    0.18
  -3   8  -9    0.19    0.17
   4  -8   9    0.08    0.15
  -4  -8  -9    0.30    0.26
  -4   8  -9    0.37    0.16
   4   8   9    0.20    0.22
  -4   8  -9    0.32    0.16
  -5  -8  -9    9.30    0.53
   5  -8   9    8.93    0.36
   5   8   9    9.16    0.49
  -5   8  -9    8.85    0.37
  -5   8  -9    9.15    0.35
   6  -8   9    0.34    0.14
  -6  -8  -9    0.84    0.26
  -6   8  -9    1.09    0.16
  -6   8  -9    0.78    0.17
   6   8   9    0.02    0.23
   7  -8   9    0.43    0.15
  -7  -8  -9    0.84    0.29
   7   8   9    0.68    0.23
  -7   8  -9    0.55    0.12
  -7   8  -9    0.44    0.13
  -8  -8  -9    0.86    0.27
   8  -8   9    0.58    0.13
   8   9  -9    0.55    0.27
   7  -9  -9    0.03    0.18
   7   9  -9    0.32    0.25
   7   9  -9    0.55    0.26
  -7   9   9   -0.12    0.15
  -6  -9   9    1.36    0.22
   6  -9  -9    1.03    0.16
   6   9  -9    1.37    0.26
  -6   9   9    1.64    0.19
   6   9  -9    0.65    0.23
  -5  -9   9   -0.06    0.21
   5  -9  -9    0.27    0.16
   5   9  -9   -0.48    0.23
   5   9  -9   -0.12    0.26
  -5   9   9    0.61    0.16
  -4  -9   9   -0.35    0.20
   4  -9  -9    0.11    0.17
   4   9  -9    0.07    0.22
   4   9  -9   -0.20    0.21
  -4   9   9    0.09    0.15
  -3  -9   9    5.99    0.40
   3  -9  -9    5.47    0.37
   3   9  -9    6.91    0.47
   3   9  -9    6.40    0.43
  -3   9   9    6.02    0.35
   2  -9  -9    5.69    0.39
  -2  -9   9    5.16    0.37
   2   9  -9    5.74    0.42
  -2   9   9    5.01    0.36
   2   9  -9    5.79    0.42
  -1  -9   9   10.75    0.45
   1  -9  -9   10.78    0.49
  -1   9   9   10.89    0.47
   1   9  -9   10.64    0.48
   1   9  -9   11.23    0.50
   0  -9  -9    1.55    0.24
   0  -9   9    1.44    0.20
   0   9   9    1.63    0.21
   0   9  -9    1.57    0.23
   0   9  -9    1.50    0.22
  -1  -9  -9    4.26    0.42
   1  -9   9    4.01    0.34
   1   9   9    3.69    0.39
  -1   9  -9    4.54    0.37
  -1   9  -9    4.25    0.36
  -2  -9  -9    1.90    0.28
   2  -9   9    1.47    0.19
   2   9   9    1.41    0.24
  -2   9  -9    1.61    0.21
  -2   9  -9    1.87    0.21
   3  -9   9    1.34    0.20
  -3  -9  -9    1.94    0.28
  -3   9  -9    0.99    0.18
  -3   9  -9    1.12    0.19
   3   9   9    1.54    0.26
  -4  -9  -9   -0.05    0.27
   4  -9   9    0.35    0.16
   4   9   9   -0.14    0.23
  -4   9  -9    0.16    0.17
  -4   9  -9   -0.11    0.16
  -5  -9  -9    1.17    0.29
   5  -9   9    1.36    0.17
  -5   9  -9    1.06    0.18
  -5   9  -9    1.10    0.18
   5   9   9    0.87    0.22
   6  -9   9    2.65    0.25
  -6  -9  -9    2.94    0.35
   6   9   9    1.90    0.28
  -6   9  -9    2.17    0.18
  -7  -9  -9    1.11    0.31
   7  -9   9    0.86    0.13
  -7   9  -9    0.62    0.14
  -7   9  -9    0.95    0.13
   6  10  -9    0.10    0.23
   6  10  -9    0.05    0.26
   5 -10  -9    0.52    0.16
   5  10  -9   -0.38    0.24
  -5  10   9    0.62    0.22
   5  10  -9    0.36    0.26
   4 -10  -9   12.33    0.47
  -4 -10   9   12.71    0.69
  -4  10   9   12.17    0.48
   4  10  -9   11.18    0.53
   4  10  -9   12.38    0.56
   3 -10  -9    0.65    0.19
  -3 -10   9    0.63    0.21
   3  10  -9   -0.12    0.22
  -3  10   9    0.09    0.19
   3  10  -9    0.36    0.23
   2 -10  -9    1.38    0.22
  -2 -10   9    0.76    0.20
   2  10  -9    1.00    0.24
  -2  10   9    1.24    0.20
   2  10  -9    1.13    0.23
  -1 -10   9   -0.16    0.19
   1 -10  -9    0.20    0.22
   1  10  -9   -0.08    0.21
   1  10  -9   -0.25    0.20
  -1  10   9    0.22    0.19
   0 -10  -9    0.24    0.23
   0 -10   9    0.46    0.19
   0  10  -9    0.25    0.21
   0  10  -9    0.06    0.22
   1 -10   9    0.26    0.19
  -1 -10  -9   -0.12    0.26
   1  10   9   -0.24    0.21
  -1  10  -9   -0.01    0.19
  -1  10  -9    0.36    0.19
  -2 -10  -9    2.08    0.30
   2 -10   9    2.48    0.28
   2  10   9    2.73    0.26
  -2  10  -9    2.54    0.23
  -2  10  -9    2.68    0.23
   3 -10   9    0.57    0.18
  -3 -10  -9    1.04    0.29
   3  10   9    0.66    0.24
  -3  10  -9    0.89    0.21
  -3  10  -9    0.61    0.19
  -4 -10  -9    0.39    0.27
   4 -10   9    1.18    0.15
   4  10   9    0.77    0.26
  -4  10  -9    0.89    0.18
  -4  10  -9    0.43    0.22
  -5 -10  -9    0.53    0.27
   5 -10   9    0.60    0.17
  -5  10  -9    0.79    0.18
  -5  10  -9    1.31    0.29
   5  10   9    0.61    0.23
   6 -10   9    2.91    0.25
  -6 -10  -9    2.09    0.32
  -6  10  -9    2.42    0.18
   6  10   9    2.04    0.41
   3 -11  -9   -0.12    0.21
  -3  11   9    0.89    0.27
   3  11  -9    0.02    0.26
   3  11  -9    0.31    0.25
   2 -11  -9    0.02    0.22
   2  11  -9   -0.27    0.22
   2  11  -9    0.00    0.23
  -2  11   9   -0.19    0.22
   1 -11  -9    2.91    0.29
   1  11  -9    2.38    0.27
   1  11  -9    2.88    0.28
  -1  11   9    3.17    0.28
   0 -11  -9    0.27    0.26
   0  11   9   -0.15    0.21
   0  11  -9    0.37    0.21
   0  11  -9    0.19    0.42
  -1 -11  -9    2.82    0.31
  -1  11  -9    2.43    0.29
  -1  11  -9    2.89    0.25
   1  11   9    2.76    0.27
  -2 -11  -9   10.96    0.58
   2  11   9   10.19    0.51
  -2  11  -9   10.66    0.47
  -2  11  -9   11.18    0.54
  -3 -11  -9    3.66    0.36
   3  11   9    2.69    0.27
  -3  11  -9    3.73    0.34
  -4 -11  -9    0.65    0.33
   4  11   9    0.75    0.23
  -4  11  -9    0.41    0.18
  12   0 -10    0.13    0.31
 -11   0  10    0.42    0.20
  11   0 -10    0.28    0.22
  11   0 -10    0.10    0.19
  10   0 -10    0.39    0.19
  10   0 -10    0.11    0.18
 -10   0  10    0.55    0.17
   9   0 -10    0.15    0.19
  -9   0  10    0.38    0.18
   9   0 -10    0.19    0.20
   8   0 -10    6.87    0.38
  -8   0  10    6.88    0.36
   8   0 -10    6.35    0.39
   7   0 -10    3.70    0.33
   7   0 -10    3.93    0.33
  -7   0  10    3.40    0.30
   6   0 -10    0.00    0.18
   6   0 -10    0.28    0.18
  -6   0  10   -0.06    0.16
  -5   0  10    3.43    0.30
   5   0 -10    3.44    0.32
   5   0 -10    3.65    0.33
  -4   0  10   24.62    0.71
   4   0 -10   24.73    0.71
  -3   0  10   26.01    0.73
   3   0 -10   26.01    0.74
  -2   0  10   18.13    0.55
   2   0 -10   17.15    0.55
   1   0 -10   23.76    0.69
  -1   0  10   24.88    0.69
   0   0  10    3.36    0.28
   0   0 -10    3.03    0.29
  -1   0 -10    4.93    0.32
   1   0  10    4.23    0.30
  -2   0 -10    4.05    0.31
   2   0  10    3.48    0.29
  -3   0 -10    8.55    0.38
   3   0  10    8.60    0.37
  -4   0 -10    5.49    0.34
   5   0  10    0.23    0.17
  -5   0 -10    0.22    0.18
   6   0  10    0.41    0.17
  -6   0 -10    0.27    0.18
   7   0  10   48.68    1.30
  -7   0 -10   50.77    1.31
   8   0  10    4.07    0.32
  -8   0 -10    3.39    0.34
  -9   0 -10    0.48    0.19
   9   0  10    0.50    0.17
 -10   0 -10    0.31    0.20
  10   0  10    0.15    0.18
 -11   0 -10   -0.15    0.20
  11   0  10    0.13    0.20
  12   1 -10    7.73    0.46
  11  -1 -10    0.41    0.19
  11  -1 -10    0.33    0.18
 -11  -1  10    0.39    0.20
  11   1 -10    0.07    0.22
 -11   1  10   -0.15    0.20
  11   1 -10    0.44    0.22
  10  -1 -10    0.44    0.19
  10  -1 -10    0.21    0.19
 -10  -1  10   -0.12    0.18
 -10   1  10    0.28    0.15
  10   1 -10    0.18    0.21
   9  -1 -10    0.36    0.18
   9  -1 -10    0.32    0.18
  -9  -1  10    0.24    0.17
   9   1 -10    0.10    0.18
   9   1 -10    0.19    0.21
  -9   1  10    0.40    0.16
   8  -1 -10    0.27    0.18
   8  -1 -10    0.28    0.18
  -8  -1  10    0.16    0.18
   8   1 -10   -0.04    0.18
   8   1 -10    0.48    0.20
  -8   1  10    0.34    0.15
   7  -1 -10    2.48    0.23
  -7  -1  10    2.86    0.31
   7  -1 -10    2.79    0.31
   7   1 -10    2.62    0.23
  -7   1  10    2.44    0.20
   7   1 -10    3.03    0.24
  -6  -1  10    1.99    0.21
   6  -1 -10    1.88    0.20
   6  -1 -10    1.70    0.20
   6   1 -10    1.90    0.20
   6   1 -10    1.72    0.21
  -6   1  10    1.65    0.19
   5  -1 -10   -0.19    0.17
  -5  -1  10    0.08    0.17
   5   1 -10    0.16    0.17
   5   1 -10    0.16    0.18
  -5   1  10   -0.13    0.15
   4  -1 -10    3.47    0.31
  -4  -1  10    3.49    0.30
  -4   1  10    3.19    0.29
   4   1 -10    3.77    0.33
   4   1 -10    2.75    0.25
   3  -1 -10   12.02    0.44
  -3  -1  10   11.61    0.43
   3   1 -10   11.91    0.45
  -3   1  10   12.31    0.43
   2  -1 -10   98.99    2.42
  -2  -1  10   95.22    2.42
  -2   1  10   96.87    2.42
   2   1 -10   98.24    2.43
   1  -1 -10    0.18    0.17
  -1  -1  10    0.22    0.15
   1   1 -10   -0.05    0.16
  -1   1  10   -0.07    0.15
   0  -1  10    1.45    0.18
   0  -1 -10    1.30    0.18
   0   1  10    1.24    0.18
   0   1 -10    1.43    0.18
   1  -1  10    4.06    0.28
  -1  -1 -10    3.84    0.32
  -1   1 -10    3.70    0.30
   1   1  10    4.30    0.31
  -2  -1 -10   11.50    0.43
   2  -1  10   10.81    0.40
  -2   1 -10   11.46    0.42
   2   1  10   10.46    0.42
  -3  -1 -10   22.10    0.65
   3  -1  10   21.63    0.63
   3   1  10   21.14    0.64
  -3   1 -10   21.18    0.64
  -4  -1 -10   15.51    0.53
  -4   1 -10   15.74    0.51
   4   1  10   15.49    0.61
   5  -1  10    1.46    0.18
  -5  -1 -10    1.57    0.21
  -5   1 -10    1.31    0.19
   5   1  10    1.86    0.20
  -6  -1 -10    0.33    0.18
   6  -1  10   -0.12    0.16
   6   1  10   -0.16    0.16
  -6   1 -10   -0.02    0.19
  -7  -1 -10   43.52    1.16
   7  -1  10   42.86    1.14
   7   1  10   42.87    1.15
  -7   1 -10   43.63    1.14
   8  -1  10   53.34    1.41
  -8  -1 -10   55.07    1.43
  -8   1 -10   54.38    1.41
   8   1  10   55.29    1.42
   9  -1  10    1.92    0.20
  -9  -1 -10    1.86    0.23
  -9   1 -10    1.94    0.21
   9   1  10    1.83    0.22
  10  -1  10    0.45    0.16
 -10  -1 -10    0.00    0.20
 -10   1 -10    0.04    0.18
  10   1  10    0.11    0.17
  11  -1  10    0.60    0.17
 -11  -1 -10    0.97    0.22
 -11   1 -10    0.63    0.20
  11   1  10    0.70    0.26
  12  -2 -10    0.35    0.22
  12   2 -10    0.21    0.26
  11  -2 -10    1.22    0.17
  11  -2 -10    1.04    0.18
 -11  -2  10    0.92    0.22
 -11   2  10    0.84    0.22
  11   2 -10    1.21    0.25
  10  -2 -10    0.22    0.16
  10  -2 -10    0.03    0.18
 -10  -2  10   -0.15    0.20
  10   2 -10    0.29    0.23
 -10   2  10   -0.09    0.15
  10   2 -10   -0.22    0.19
   9  -2 -10    3.72    0.30
   9  -2 -10    3.39    0.32
  -9  -2  10    2.76    0.24
  -9   2  10    3.19    0.29
   9   2 -10    3.02    0.27
   9   2 -10    3.10    0.34
  -8  -2  10    1.64    0.22
   8  -2 -10    1.92    0.20
   8  -2 -10    2.33    0.20
   8   2 -10    2.10    0.24
   8   2 -10    1.97    0.22
  -8   2  10    1.90    0.19
   7  -2 -10   34.74    0.96
   7  -2 -10   36.26    0.97
  -7  -2  10   36.10    0.98
  -7   2  10   35.15    0.95
   7   2 -10   35.11    0.99
   7   2 -10   35.02    0.99
   6  -2 -10    6.03    0.35
  -6  -2  10    6.68    0.37
  -6   2  10    6.77    0.33
   6   2 -10    6.12    0.39
   6   2 -10    6.11    0.38
   5  -2 -10    1.38    0.18
  -5  -2  10    1.40    0.19
   5   2 -10    1.22    0.20
  -5   2  10    1.05    0.17
   5   2 -10    1.07    0.19
   4  -2 -10    1.21    0.18
  -4  -2  10    1.21    0.18
   4   2 -10    1.20    0.21
  -4   2  10    1.22    0.17
   3  -2 -10   29.30    0.79
  -3  -2  10   27.36    0.79
   3   2 -10   28.55    0.80
   3   2 -10   27.27    0.79
  -3   2  10   27.34    0.77
   2  -2 -10    1.31    0.19
  -2  -2  10    1.27    0.18
  -2   2  10    0.95    0.16
   2   2 -10    1.25    0.20
   1  -2 -10    0.33    0.16
  -1  -2  10    0.00    0.15
  -1   2  10    0.16    0.16
   1   2 -10    0.23    0.16
   0  -2 -10    8.27    0.39
   0  -2  10    8.38    0.36
   0   2  10    8.57    0.37
   0   2 -10    7.84    0.36
   1  -2  10    2.45    0.27
  -1  -2 -10    2.14    0.20
  -1   2 -10    1.93    0.19
   1   2  10    2.38    0.21
  -2  -2 -10   49.48    1.29
   2  -2  10   48.69    1.27
  -2   2 -10   49.53    1.28
   2   2  10   50.25    1.29
  -3  -2 -10    9.98    0.43
   3  -2  10   10.57    0.38
   3   2  10   10.82    0.42
  -3   2 -10   10.26    0.41
  -4  -2 -10    0.27    0.18
   4  -2  10    0.16    0.15
   4   2  10    0.38    0.16
  -4   2 -10    0.59    0.17
   5  -2  10    1.59    0.18
  -5   2 -10    1.64    0.19
   5   2  10    1.96    0.21
  -6  -2 -10    3.75    0.35
   6  -2  10    2.94    0.29
   6   2  10    3.29    0.32
  -6   2 -10    3.22    0.26
   7  -2  10   14.44    0.48
  -7  -2 -10   14.40    0.53
  -7   2 -10   14.10    0.49
   7   2  10   14.53    0.51
   8  -2  10   12.76    0.44
  -8  -2 -10   12.70    0.51
  -8   2 -10   12.40    0.45
   8   2  10   12.27    0.47
   9  -2  10    0.75    0.17
  -9  -2 -10    0.83    0.22
   9   2  10    0.94    0.20
  -9   2 -10    1.00    0.19
  10  -2  10    0.19    0.14
 -10  -2 -10    0.30    0.22
 -10   2 -10    0.06    0.17
  10   2  10    0.20    0.21
  11  -2  10    4.92    0.31
 -11  -2 -10    5.34    0.43
 -11   2 -10    6.22    0.35
  11  -3 -10   -0.20    0.18
  11  -3 -10    0.32    0.16
 -11  -3  10    0.32    0.23
 -11   3  10    0.62    0.22
  11   3 -10    0.06    0.26
 -10  -3  10    0.93    0.23
  10  -3 -10    0.86    0.17
  10  -3 -10    0.75    0.16
 -10   3  10    0.89    0.17
  10   3 -10    0.84    0.21
   9  -3 -10    0.02    0.15
   9  -3 -10   -0.33    0.18
  -9   3  10   -0.09    0.14
   9   3 -10    0.14    0.22
   9   3 -10    0.09    0.20
   8  -3 -10    6.26    0.35
  -8  -3  10    5.95    0.45
   8  -3 -10    6.41    0.33
   8   3 -10    6.33    0.42
  -8   3  10    6.09    0.32
   8   3 -10    7.44    0.40
   7  -3 -10    0.26    0.16
  -7  -3  10    0.31    0.19
  -7   3  10    0.27    0.15
   7   3 -10    0.22    0.20
   7   3 -10    0.47    0.22
  -6  -3  10   12.27    0.48
   6  -3 -10   12.06    0.45
   6   3 -10   12.08    0.50
  -6   3  10   12.05    0.42
   6   3 -10   12.91    0.51
   5  -3 -10    1.02    0.18
  -5  -3  10    0.93    0.20
   5   3 -10    0.84    0.21
  -5   3  10    1.14    0.17
   5   3 -10    1.38    0.21
   4  -3 -10    4.74    0.33
  -4  -3  10    4.91    0.35
   4   3 -10    4.98    0.37
  -4   3  10    4.93    0.31
   4   3 -10    5.09    0.36
   3  -3 -10    1.64    0.19
  -3  -3  10    1.53    0.19
  -3   3  10    1.40    0.18
   3   3 -10    1.31    0.19
   3   3 -10    1.68    0.21
   2  -3 -10   15.99    0.53
  -2  -3  10   15.32    0.53
   2   3 -10   16.32    0.53
   2   3 -10   16.23    0.54
  -2   3  10   15.85    0.52
   1  -3 -10    1.90    0.21
  -1  -3  10    1.93    0.20
   1   3 -10    1.63    0.20
   1   3 -10    1.33    0.20
  -1   3  10    1.74    0.19
   0  -3  10    5.30    0.31
   0  -3 -10    5.03    0.34
   0   3 -10    5.46    0.33
   0   3  10    5.38    0.33
   1  -3  10    9.63    0.38
  -1  -3 -10   10.26    0.42
   1   3  10    9.84    0.41
  -1   3 -10    9.35    0.39
  -2  -3 -10   13.18    0.50
   2  -3  10   12.88    0.45
  -2   3 -10   13.96    0.47
   2   3  10   13.98    0.49
  -3  -3 -10    3.17    0.25
   3   3  10    3.32    0.32
  -3   3 -10    2.62    0.21
   4  -3  10    1.51    0.17
  -4  -3 -10    1.34    0.21
   4   3  10    1.53    0.20
  -4   3 -10    1.38    0.19
  -5  -3 -10    1.39    0.22
   5  -3  10    1.72    0.18
  -5   3 -10    2.07    0.19
   5   3  10    1.88    0.21
   6  -3  10   -0.19    0.14
  -6  -3 -10   -0.19    0.20
  -6   3 -10    0.04    0.16
   6   3  10    0.10    0.18
  -7  -3 -10    3.64    0.38
   7  -3  10    3.40    0.28
  -7   3 -10    3.38    0.28
   7   3  10    3.43    0.32
  -8  -3 -10   -0.04    0.21
   8  -3  10    0.03    0.15
   8   3  10    0.06    0.18
  -8   3 -10    0.07    0.17
  -9  -3 -10    1.31    0.23
   9  -3  10    1.59    0.16
   9   3  10    1.66    0.22
  -9   3 -10    1.53    0.18
  10  -3  10    0.57    0.15
 -10  -3 -10    0.58    0.24
  10   3  10   -0.03    0.23
 -10   3 -10    0.08    0.16
  11  -3  10    0.51    0.14
 -11  -3 -10   -0.09    0.23
 -11   3 -10    0.61    0.17
 -11  -4  10    1.45    0.25
  11  -4 -10    0.97    0.17
  11   4 -10    1.47    0.29
  10  -4 -10    0.52    0.17
  10  -4 -10    0.10    0.13
 -10  -4  10    0.40    0.21
  10   4 -10    0.44    0.42
  10   4 -10    0.39    0.25
 -10   4  10    0.30    0.17
  -9  -4  10   -0.26    0.20
   9  -4 -10    0.17    0.14
   9  -4 -10   -0.16    0.16
   9   4 -10    0.52    0.25
   9   4 -10   -0.23    0.19
  -9   4  10    0.14    0.14
   8  -4 -10    1.17    0.17
  -8  -4  10    1.18    0.24
   8  -4 -10    1.14    0.20
  -8   4  10    1.29    0.16
   8   4 -10    1.41    0.25
   8   4 -10    0.99    0.21
   7  -4 -10   18.63    0.57
  -7  -4  10   18.37    0.64
  -7   4  10   18.20    0.55
   7   4 -10   18.51    0.64
  -6  -4  10    4.75    0.38
   6  -4 -10    5.00    0.32
  -6   4  10    4.80    0.29
   6   4 -10    5.33    0.40
   6   4 -10    4.91    0.39
   5  -4 -10    8.59    0.39
  -5  -4  10    8.67    0.42
   5   4 -10    9.36    0.46
  -5   4  10    9.55    0.37
   5   4 -10    8.14    0.44
   4  -4 -10    5.73    0.34
  -4  -4  10    4.78    0.42
   4   4 -10    5.35    0.38
  -4   4  10    5.46    0.32
   4   4 -10    4.99    0.40
   3  -4 -10   12.00    0.45
  -3  -4  10   10.03    0.67
  -3   4  10   11.49    0.43
   3   4 -10   12.03    0.47
   3   4 -10   11.59    0.47
   2  -4 -10    5.87    0.35
   2   4 -10    5.68    0.37
  -2   4  10    5.45    0.34
   2   4 -10    5.40    0.36
   1  -4 -10   30.91    0.87
  -1   4  10   31.35    0.86
   1   4 -10   31.42    0.87
   1   4 -10   30.52    0.87
   0  -4  10    3.00    0.35
   0  -4 -10    3.52    0.35
   0   4  10    3.81    0.32
   0   4 -10    3.97    0.32
   0   4 -10    3.87    0.32
  -1  -4 -10    0.22    0.18
   1  -4  10    0.22    0.17
  -1   4 -10    0.19    0.17
   1   4  10    0.13    0.18
  -1   4 -10   -0.31    0.16
  -2  -4 -10    7.94    0.41
   2  -4  10    7.76    0.35
  -2   4 -10    7.82    0.36
  -2   4 -10    7.23    0.36
   2   4  10    7.60    0.39
   3  -4  10   16.83    0.51
  -3  -4 -10   16.53    0.57
  -3   4 -10   15.98    0.52
   3   4  10   15.49    0.63
   4  -4  10   -0.10    0.15
   4   4  10   -0.16    0.19
  -4   4 -10   -0.20    0.16
  -5  -4 -10   -0.04    0.21
   5  -4  10   -0.02    0.14
   5   4  10    0.45    0.19
   6  -4  10   -0.01    0.14
  -6  -4 -10   -0.07    0.20
  -6   4 -10    0.15    0.15
   6   4  10    0.32    0.19
   7  -4  10   20.20    0.59
  -7  -4 -10   19.86    0.68
  -7   4 -10   20.23    0.60
   7   4  10   19.99    0.65
   8  -4  10   -0.12    0.13
  -8  -4 -10   -0.01    0.21
   8   4  10    0.14    0.19
  -8   4 -10   -0.11    0.15
  -9  -4 -10    0.78    0.24
   9  -4  10    1.08    0.15
   9   4  10    0.47    0.20
  -9   4 -10    1.01    0.17
  10  -4  10    0.85    0.15
 -10  -4 -10    0.27    0.24
 -10   4 -10    0.67    0.16
  11  -4  10    2.19    0.24
 -11   4 -10    2.16    0.17
 -11  -5  10   -0.02    0.23
  11  -5 -10   -0.13    0.17
 -10  -5  10    0.51    0.22
  10  -5 -10    0.38    0.17
  10  -5 -10    0.19    0.13
  10   5 -10    0.00    0.28
 -10   5  10    0.14    0.16
  -9  -5  10    1.25    0.24
   9  -5 -10    1.43    0.15
   9  -5 -10    1.38    0.19
   9   5 -10    1.11    0.24
   9   5 -10    1.50    0.28
  -9   5  10    1.23    0.17
   8  -5 -10    3.17    0.26
  -8  -5  10    3.56    0.40
  -8   5  10    3.49    0.25
   8   5 -10    3.45    0.30
   8   5 -10    3.88    0.39
  -7  -5  10    1.37    0.25
   7  -5 -10    1.27    0.16
  -7   5  10    1.12    0.16
   7   5 -10    1.67    0.26
   7   5 -10    1.48    0.24
  -6  -5  10   25.72    0.79
   6  -5 -10   26.52    0.73
   6   5 -10   25.66    0.80
  -6   5  10   25.79    0.72
   6   5 -10   25.26    0.80
   5  -5 -10    6.19    0.34
  -5  -5  10    7.01    0.39
   5   5 -10    6.64    0.42
  -5   5  10    6.33    0.32
   5   5 -10    6.35    0.42
   4  -5 -10   -0.20    0.16
  -4  -5  10   -0.10    0.19
  -4   5  10   -0.02    0.15
   4   5 -10    0.22    0.21
   4   5 -10   -0.15    0.19
  -3  -5  10   58.86    1.44
   3  -5 -10   58.89    1.42
   3   5 -10   51.82    1.50
   3   5 -10   45.46    1.59
  -3   5  10   57.65    1.41
   2  -5 -10    0.36    0.19
  -2  -5  10    0.53    0.17
  -2   5  10    0.51    0.17
   2   5 -10    0.28    0.28
   2   5 -10    0.33    0.19
  -1  -5  10    0.28    0.18
   1  -5 -10    0.22    0.19
   1   5 -10    0.21    0.20
   1   5 -10    0.56    0.19
  -1   5  10    0.42    0.18
   0  -5  10   13.58    0.48
   0  -5 -10   13.62    0.51
   0   5 -10   14.30    0.51
   0   5 -10   13.17    0.51
   0   5  10   13.73    0.50
  -1  -5 -10    2.12    0.22
   1  -5  10    2.38    0.20
   1   5  10    2.46    0.23
  -1   5 -10    2.65    0.25
  -1   5 -10    2.35    0.21
  -2  -5 -10   16.18    0.59
   2  -5  10   17.32    0.53
  -2   5 -10   16.56    0.55
   2   5  10   17.18    0.58
   3  -5  10    1.04    0.17
  -3  -5 -10    0.82    0.22
   3   5  10    0.91    0.21
  -3   5 -10    1.01    0.17
  -4  -5 -10   13.93    0.55
   4  -5  10   13.95    0.47
  -4   5 -10   13.89    0.48
   4   5  10   13.54    0.52
  -4   5 -10   14.22    0.47
   5  -5  10    1.64    0.16
  -5  -5 -10    1.66    0.24
  -5   5 -10    1.53    0.17
  -5   5 -10    1.39    0.18
   5   5  10    1.40    0.23
   6  -5  10    6.09    0.31
  -6  -5 -10    5.92    0.44
  -6   5 -10    6.29    0.32
   6   5  10    6.58    0.40
  -6   5 -10    5.85    0.30
  -7  -5 -10   10.07    0.50
   7  -5  10    9.85    0.37
  -7   5 -10    9.82    0.36
   7   5  10   10.23    0.46
  -7   5 -10   10.09    0.39
   8  -5  10    0.11    0.13
  -8  -5 -10    0.09    0.24
  -8   5 -10    0.11    0.15
  -8   5 -10   -0.07    0.14
   8   5  10    0.22    0.20
   9  -5  10    0.09    0.13
  -9  -5 -10    0.13    0.25
  -9   5 -10    0.07    0.15
  -9   5 -10    0.09    0.13
   9   5  10    0.22    0.22
 -10  -5 -10   -0.22    0.25
  10  -5  10   -0.11    0.12
 -10   5 -10    0.31    0.13
 -10   5 -10   -0.01    0.11
  10  -6 -10    1.98    0.18
 -10  -6  10    1.94    0.26
  10   6 -10    1.65    0.31
   9  -6 -10    3.83    0.29
   9  -6 -10    3.26    0.25
  -9  -6  10    3.52    0.38
   9   6 -10    4.96    0.50
   8  -6 -10    2.92    0.25
  -8  -6  10    2.69    0.27
   8   6 -10    2.71    0.27
  -8   6  10    3.00    0.26
   8   6 -10    3.54    0.31
  -7  -6  10    1.14    0.26
   7  -6 -10    1.13    0.16
  -7   6  10    0.89    0.15
   7   6 -10    1.18    0.26
   7   6 -10    1.21    0.22
   6  -6 -10    2.55    0.28
  -6  -6  10    2.31    0.24
  -6   6  10    2.92    0.26
   6   6 -10    2.24    0.27
   6   6 -10    3.07    0.28
  -5  -6  10    7.09    0.42
   5  -6 -10    6.99    0.36
   5   6 -10    6.84    0.44
  -5   6  10    6.88    0.33
   5   6 -10    7.26    0.44
   4  -6 -10   34.91    0.95
  -4  -6  10   33.59    0.98
   4   6 -10   35.16    1.00
   4   6 -10   34.53    0.98
  -4   6  10   35.20    0.94
  -3  -6  10    0.04    0.18
   3  -6 -10    0.18    0.18
   3   6 -10    0.27    0.20
   3   6 -10    0.38    0.21
  -3   6  10    0.12    0.16
  -2  -6  10   -0.05    0.17
   2  -6 -10    0.16    0.19
   2   6 -10    0.05    0.20
   2   6 -10   -0.13    0.18
  -2   6  10   -0.02    0.17
   1  -6 -10   22.82    0.70
  -1  -6  10   22.85    0.68
   1   6 -10   21.17    0.68
  -1   6  10   23.14    0.68
   1   6 -10   22.38    0.71
   0  -6  10    0.76    0.18
   0  -6 -10    0.69    0.20
   0   6 -10    0.70    0.20
   0   6 -10    0.86    0.20
   0   6  10    0.68    0.19
  -1  -6 -10    5.87    0.41
   1  -6  10    5.31    0.33
   1   6  10    5.80    0.39
  -1   6 -10    6.24    0.36
  -1   6 -10    6.29    0.37
  -2  -6 -10    7.12    0.43
   2  -6  10    7.28    0.36
  -2   6 -10    6.89    0.36
  -2   6 -10    7.62    0.37
   2   6  10    6.25    0.41
  -3  -6 -10    4.65    0.49
   3  -6  10    5.45    0.32
  -3   6 -10    5.12    0.33
  -3   6 -10    5.05    0.32
   3   6  10    4.87    0.38
   4  -6  10    5.07    0.30
  -4  -6 -10    5.16    0.42
  -4   6 -10    5.31    0.32
  -4   6 -10    4.59    0.30
   4   6  10    4.57    0.40
   5  -6  10    2.94    0.27
  -5  -6 -10    2.88    0.29
  -5   6 -10    3.02    0.27
   5   6  10    2.23    0.24
  -5   6 -10    2.63    0.29
   6  -6  10    1.17    0.16
  -6  -6 -10    1.37    0.26
  -6   6 -10    1.12    0.16
  -6   6 -10    1.11    0.18
   6   6  10    0.71    0.22
   7  -6  10    0.65    0.14
  -7  -6 -10    0.31    0.24
  -7   6 -10    0.35    0.15
   7   6  10    0.10    0.20
  -7   6 -10    0.35    0.15
   8  -6  10    0.37    0.14
  -8  -6 -10    0.19    0.25
  -8   6 -10    0.27    0.15
   8   6  10   -0.09    0.22
  -8   6 -10    0.37    0.14
  -9  -6 -10    1.64    0.30
   9  -6  10    1.41    0.15
  -9   6 -10    1.87    0.18
  -9   6 -10    2.15    0.22
  10  -6  10    2.36    0.24
   9  -7 -10   -0.08    0.17
  -9  -7  10    0.30    0.22
   9   7 -10    0.66    0.27
   8  -7 -10    3.22    0.25
  -8  -7  10    3.85    0.38
   8   7 -10    3.23    0.32
  -8   7  10    3.90    0.31
   8   7 -10    2.34    0.27
   7  -7 -10    0.12    0.15
  -7  -7  10    0.24    0.24
   7   7 -10    0.10    0.21
  -7   7  10    0.08    0.14
   7   7 -10    0.29    0.26
   6  -7 -10    0.01    0.15
  -6  -7  10   -0.60    0.21
   6   7 -10    0.19    0.23
   6   7 -10    0.01    0.24
  -6   7  10    0.46    0.15
   5  -7 -10    1.95    0.20
  -5  -7  10    2.21    0.24
  -5   7  10    2.10    0.19
   5   7 -10    2.20    0.26
   5   7 -10    1.71    0.26
  -4  -7  10    0.34    0.21
   4  -7 -10    0.49    0.18
   4   7 -10    0.48    0.25
   4   7 -10    0.56    0.23
  -4   7  10    0.50    0.16
  -3  -7  10    7.40    0.41
   3  -7 -10    7.33    0.39
   3   7 -10    7.71    0.43
   3   7 -10    7.47    0.46
  -3   7  10    7.51    0.36
   2  -7 -10   10.31    0.44
  -2  -7  10    8.91    0.42
  -2   7  10    9.55    0.41
   2   7 -10    9.38    0.45
   2   7 -10    9.91    0.50
  -1  -7  10    0.47    0.17
   1  -7 -10    0.11    0.19
   1   7 -10    0.37    0.20
  -1   7  10    0.23    0.18
   1   7 -10    0.19    0.21
   0  -7  10    1.66    0.19
   0  -7 -10    1.91    0.24
   0   7  10    2.08    0.22
   0   7 -10    2.14    0.22
   0   7 -10    2.10    0.21
  -1  -7 -10    1.63    0.24
   1  -7  10    1.08    0.17
  -1   7 -10    1.83    0.21
  -1   7 -10    1.39    0.20
   1   7  10    1.82    0.25
   2  -7  10   27.71    0.77
  -2  -7 -10   24.36    0.90
   2   7  10   27.78    0.82
  -2   7 -10   27.48    0.78
  -2   7 -10   27.57    0.78
   3  -7  10    3.19    0.29
  -3  -7 -10    2.96    0.29
   3   7  10    3.75    0.41
  -3   7 -10    3.93    0.31
  -3   7 -10    3.71    0.31
  -4  -7 -10    0.22    0.24
   4  -7  10    0.22    0.15
  -4   7 -10   -0.07    0.16
  -4   7 -10    0.24    0.17
   4   7  10    0.23    0.21
   5  -7  10    1.19    0.17
  -5  -7 -10    1.17    0.26
  -5   7 -10    1.22    0.17
   5   7  10    1.14    0.24
  -5   7 -10    0.90    0.18
  -6  -7 -10    0.97    0.27
   6  -7  10    1.22    0.16
  -6   7 -10    1.52    0.17
   6   7  10    1.11    0.23
  -6   7 -10    1.24    0.15
   7  -7  10    1.26    0.15
  -7  -7 -10    1.03    0.29
   7   7  10    0.95    0.22
  -7   7 -10    1.08    0.20
  -7   7 -10    1.22    0.16
  -8  -7 -10   -0.11    0.26
   8  -7  10    0.91    0.15
  -8   7 -10    0.43    0.12
  -8   7 -10    0.49    0.14
   9  -7  10   -0.14    0.14
  -9  -7 -10    0.47    0.35
  -8  -8  10   21.52    0.73
   8   8 -10   22.64    0.80
  -7  -8  10    1.80    0.25
   7  -8 -10    2.71    0.25
   7   8 -10    2.89    0.32
   7   8 -10    1.45    0.24
  -7   8  10    2.57    0.20
   6  -8 -10    3.26    0.28
  -6  -8  10    3.01    0.27
  -6   8  10    3.15    0.29
   6   8 -10    3.24    0.30
   6   8 -10    2.91    0.29
  -5  -8  10    0.54    0.21
   5  -8 -10    0.83    0.17
   5   8 -10    0.81    0.25
   5   8 -10    0.31    0.26
  -5   8  10    0.36    0.16
  -4  -8  10    3.14    0.35
   4  -8 -10    2.86    0.31
   4   8 -10    2.78    0.29
   4   8 -10    2.33    0.29
  -4   8  10    2.68    0.30
  -3  -8  10    1.12    0.20
   3  -8 -10    0.45    0.19
   3   8 -10    0.63    0.25
  -3   8  10    0.72    0.18
   3   8 -10    0.75    0.22
  -2  -8  10    6.06    0.38
   2  -8 -10    5.91    0.40
   2   8 -10    6.25    0.44
  -2   8  10    6.26    0.36
   2   8 -10    5.69    0.41
   1  -8 -10   19.09    0.64
  -1  -8  10   18.31    0.61
  -1   8  10   18.62    0.61
   1   8 -10   18.47    0.65
   1   8 -10   18.34    0.63
   0  -8  10   23.84    0.71
   0  -8 -10   24.40    0.75
   0   8 -10   23.75    0.74
   0   8 -10   23.24    0.72
   0   8  10   23.26    0.74
  -1  -8 -10   -0.18    0.23
   1  -8  10   -0.03    0.17
  -1   8 -10    0.09    0.18
   1   8  10    0.11    0.20
  -1   8 -10    0.03    0.19
   2  -8  10   33.29    0.93
  -2  -8 -10   34.15    1.01
   2   8  10   34.52    0.98
  -2   8 -10   32.38    0.94
  -2   8 -10   34.28    0.94
   3  -8  10    6.32    0.33
  -3  -8 -10    6.77    0.49
  -3   8 -10    6.43    0.36
  -3   8 -10    6.35    0.35
   3   8  10    6.52    0.46
  -4  -8 -10   -0.04    0.26
   4  -8  10    0.06    0.15
   4   8  10    0.10    0.22
  -4   8 -10    0.32    0.17
  -4   8 -10    0.11    0.16
  -5  -8 -10    6.45    0.50
   5  -8  10    6.78    0.33
  -5   8 -10    6.99    0.33
   5   8  10    7.16    0.45
  -5   8 -10    7.12    0.35
   6  -8  10    0.48    0.15
  -6  -8 -10    0.57    0.26
  -6   8 -10    0.53    0.16
  -6   8 -10    0.79    0.17
   6   8  10    0.56    0.21
   7  -8  10   -0.03    0.14
  -7  -8 -10    0.03    0.28
  -7   8 -10    0.15    0.13
  -7   8 -10   -0.22    0.14
   7   8  10    0.99    0.25
   8  -8  10    4.19    0.26
  -8  -8 -10    4.30    0.38
  -8   8 -10    3.87    0.23
   7   9 -10    1.14    0.29
   6  -9 -10    0.10    0.15
  -6  -9  10    0.24    0.28
  -6   9  10    0.63    0.21
   6   9 -10    0.38    0.25
   6   9 -10    0.45    0.23
  -5  -9  10    1.78    0.25
   5  -9 -10    2.45    0.21
   5   9 -10    2.52    0.30
   5   9 -10    2.57    0.26
  -5   9  10    2.42    0.22
   4  -9 -10    4.88    0.35
  -4  -9  10    4.67    0.41
   4   9 -10    5.90    0.46
  -4   9  10    4.80    0.34
   4   9 -10    4.39    0.46
   3  -9 -10    0.38    0.19
  -3  -9  10   -0.42    0.20
  -3   9  10   -0.04    0.18
   3   9 -10    0.11    0.25
   3   9 -10    0.10    0.23
   2  -9 -10    0.93    0.22
  -2  -9  10    0.86    0.20
  -2   9  10    0.76    0.20
   2   9 -10    0.90    0.23
   2   9 -10    0.58    0.23
  -1  -9  10   13.41    0.51
   1  -9 -10   13.61    0.56
   1   9 -10   13.05    0.56
  -1   9  10   13.34    0.52
   1   9 -10   13.23    0.54
   0  -9  10    3.69    0.33
   0  -9 -10    4.66    0.44
   0   9 -10    5.30    0.40
   0   9 -10    3.85    0.38
   1  -9  10   21.44    0.67
  -1  -9 -10   21.11    0.74
   1   9  10   21.39    0.69
  -1   9 -10   21.17    0.69
  -1   9 -10   21.37    0.69
  -2  -9 -10    0.03    0.25
   2  -9  10   -0.04    0.17
  -2   9 -10    0.00    0.19
  -2   9 -10    0.10    0.19
   2   9  10    0.36    0.22
  -3  -9 -10    0.47    0.26
   3  -9  10    0.52    0.18
   3   9  10    0.07    0.23
  -3   9 -10    0.26    0.19
  -3   9 -10    0.43    0.18
   4  -9  10    2.27    0.20
  -4  -9 -10    2.52    0.32
  -4   9 -10    2.06    0.23
  -4   9 -10    2.29    0.21
   4   9  10    2.03    0.27
  -5  -9 -10   -0.61    0.26
   5  -9  10    0.25    0.15
  -5   9 -10   -0.31    0.20
   5   9  10    0.37    0.22
  -5   9 -10    0.22    0.17
  -6  -9 -10    2.20    0.32
   6  -9  10    2.69    0.26
  -6   9 -10    3.03    0.29
  -6   9 -10    2.74    0.28
   6   9  10    2.39    0.24
   7  -9  10    0.50    0.15
  -7  -9 -10    0.30    0.30
  -7   9 -10    0.55    0.14
   5  10 -10    2.16    0.26
   5  10 -10    2.70    0.32
   4 -10 -10    0.35    0.19
   4  10 -10    0.48    0.24
   4  10 -10    0.31    0.22
  -4  10  10    0.07    0.22
   3 -10 -10    0.31    0.20
  -3  10  10   -0.17    0.21
   3  10 -10    0.55    0.24
   3  10 -10    0.14    0.24
  -2 -10  10    0.07    0.28
   2 -10 -10    0.84    0.22
   2  10 -10    0.42    0.24
  -2  10  10    0.55    0.21
   2  10 -10    0.25    0.24
  -1 -10  10    0.42    0.22
   1 -10 -10    0.19    0.23
   1  10 -10    0.51    0.22
   1  10 -10    0.87    0.23
  -1  10  10   -0.11    0.19
   0 -10 -10    1.89    0.32
   0 -10  10    1.45    0.23
   0  10  10    1.94    0.24
   0  10 -10    2.45    0.28
   0  10 -10    1.71    0.24
  -1 -10 -10    0.06    0.25
   1 -10  10    0.15    0.19
   1  10  10    0.27    0.22
  -1  10 -10   -0.39    0.21
  -1  10 -10    0.11    0.20
  -2 -10 -10    0.86    0.28
   2 -10  10    1.35    0.22
  -2  10 -10    1.28    0.21
  -2  10 -10    1.63    0.24
   2  10  10    0.79    0.23
   3 -10  10    1.05    0.21
  -3 -10 -10    1.12    0.31
  -3  10 -10    0.68    0.24
   3  10  10    1.01    0.24
  -3  10 -10    0.85    0.20
   4 -10  10    0.51    0.18
  -4 -10 -10    0.77    0.30
  -4  10 -10    0.69    0.19
  -4  10 -10    0.23    0.27
   4  10  10    0.10    0.21
  -5 -10 -10    6.24    0.57
   5 -10  10    6.11    0.33
  -5  10 -10    6.81    0.36
   5  10  10    6.61    0.46
   3 -11 -10    1.76    0.32
   3  11 -10    1.01    0.25
   2 -11 -10   -0.02    0.25
   2  11 -10    0.02    0.23
  -2  11  10   -0.04    0.26
   1 -11 -10   -0.06    0.46
   1  11 -10    1.00    0.29
   1  11 -10    0.70    0.25
  -1  11  10    0.25    0.33
   0 -11 -10    1.13    0.29
   0  11 -10    1.86    0.30
   0  11  10    2.23    0.28
   0  11 -10    1.43    0.25
  -1 -11 -10    0.62    0.29
   1  11  10    0.11    0.22
  -1  11 -10    0.49    0.21
  -1  11 -10    0.34    0.25
  -2 -11 -10    0.30    0.29
  -2  11 -10   -0.02    0.19
   2  11  10    0.93    0.23
 -11   0  11    0.34    0.23
  11   0 -11   -0.25    0.20
 -10   0  11   -0.13    0.16
  10   0 -11    0.21    0.20
  10   0 -11    0.03    0.18
   9   0 -11    0.10    0.20
  -9   0  11   -0.08    0.18
   9   0 -11    0.28    0.21
   8   0 -11   -0.11    0.19
  -8   0  11   -0.10    0.16
   8   0 -11    0.13    0.19
  -7   0  11   -0.17    0.17
   7   0 -11   -0.31    0.19
   7   0 -11   -0.11    0.19
   6   0 -11    0.15    0.18
  -6   0  11    0.26    0.17
   6   0 -11   -0.06    0.19
   5   0 -11   -0.10    0.18
   5   0 -11   -0.06    0.19
  -5   0  11   -0.08    0.17
   4   0 -11    0.18    0.19
  -4   0  11    0.06    0.16
   3   0 -11   -0.10    0.17
  -3   0  11    0.02    0.16
   2   0 -11   -0.02    0.18
  -2   0  11   -0.26    0.17
  -1   0  11    0.12    0.17
   1   0 -11    0.00    0.18
   0   0 -11    0.15    0.17
   0   0  11   -0.02    0.16
   1   0  11    0.12    0.17
  -1   0 -11   -0.27    0.17
   2   0  11   -0.02    0.16
  -2   0 -11    0.02    0.18
  -3   0 -11   -0.10    0.18
   3   0  11   -0.12    0.17
  -4   0 -11    0.13    0.18
   4   0  11    0.06    0.16
  -5   0 -11   -0.06    0.18
   5   0  11   -0.11    0.16
   6   0  11   -0.14    0.16
  -6   0 -11    0.14    0.18
   7   0  11    0.02    0.18
  -7   0 -11   -0.25    0.19
  -8   0 -11   -0.05    0.19
   8   0  11   -0.17    0.18
   9   0  11    0.12    0.16
  -9   0 -11    0.15    0.20
  10   0  11    0.27    0.19
 -10   0 -11    0.03    0.20
 -11   0 -11    0.44    0.22
  11  -1 -11    0.34    0.21
 -11  -1  11    0.32    0.24
  11  -1 -11    0.46    0.25
 -11   1  11    0.55    0.23
  11   1 -11    0.44    0.23
 -10  -1  11    0.67    0.19
  10  -1 -11   -0.15    0.18
  10  -1 -11   -0.01    0.19
  10   1 -11   -0.32    0.21
 -10   1  11    0.16    0.18
  10   1 -11    0.04    0.22
   9  -1 -11    6.33    0.38
  -9  -1  11    6.57    0.40
   9  -1 -11    6.73    0.37
  -9   1  11    5.87    0.35
   9   1 -11    6.28    0.40
   9   1 -11    6.98    0.43
  -8  -1  11    3.81    0.35
   8  -1 -11    3.78    0.35
   8  -1 -11    3.73    0.35
   8   1 -11    3.99    0.35
   8   1 -11    4.70    0.38
  -8   1  11    3.83    0.32
   7  -1 -11    5.23    0.36
  -7  -1  11    6.42    0.36
   7  -1 -11    5.55    0.37
   7   1 -11    6.34    0.37
  -7   1  11    5.61    0.34
   7   1 -11    5.93    0.39
   6  -1 -11    0.00    0.17
   6  -1 -11   -0.03    0.18
  -6  -1  11    0.03    0.19
  -6   1  11   -0.01    0.16
   6   1 -11    0.16    0.19
   6   1 -11    0.21    0.19
   5  -1 -11    3.36    0.33
  -5  -1  11    3.11    0.33
   5   1 -11    3.29    0.26
  -5   1  11    3.10    0.31
   5   1 -11    3.58    0.35
   4  -1 -11   15.63    0.54
  -4  -1  11   15.31    0.52
  -4   1  11   15.08    0.52
   4   1 -11   15.28    0.54
   4   1 -11   15.70    0.54
   3  -1 -11    6.45    0.38
  -3  -1  11    7.54    0.36
   3   1 -11    6.85    0.38
  -3   1  11    7.16    0.36
   2  -1 -11    7.82    0.39
  -2  -1  11    7.84    0.37
  -2   1  11    7.86    0.36
   2   1 -11    7.58    0.39
   1  -1 -11    8.48    0.39
  -1  -1  11    7.83    0.37
   1   1 -11    7.74    0.39
  -1   1  11    8.54    0.38
   0  -1  11   34.33    0.92
   0  -1 -11   33.37    0.93
   0   1  11   33.81    0.92
   0   1 -11   33.51    0.93
   1  -1  11   17.16    0.55
  -1  -1 -11   16.97    0.57
   1   1  11   18.21    0.56
  -1   1 -11   17.23    0.56
  -2  -1 -11   27.47    0.78
   2  -1  11   26.39    0.83
   2   1  11   26.84    0.78
  -2   1 -11   27.79    0.78
   3  -1  11    5.84    0.33
  -3  -1 -11    5.89    0.37
   3   1  11    5.93    0.35
  -3   1 -11    6.00    0.36
  -4  -1 -11    7.62    0.47
   4  -1  11    7.64    0.37
  -4   1 -11    7.78    0.38
   4   1  11    8.07    0.39
  -5  -1 -11    9.15    0.43
   5  -1  11    9.58    0.39
  -5   1 -11    8.88    0.42
   5   1  11    9.22    0.41
   6  -1  11    0.64    0.18
  -6  -1 -11    0.61    0.19
  -6   1 -11    0.55    0.19
   6   1  11    0.72    0.19
  -7  -1 -11   15.21    0.55
   7  -1  11   15.62    0.53
   7   1  11   15.51    0.53
  -7   1 -11   15.60    0.53
  -8  -1 -11    1.09    0.22
   8  -1  11    0.71    0.17
   8   1  11    0.94    0.19
  -8   1 -11    1.14    0.20
  -9  -1 -11   -0.13    0.21
   9  -1  11    0.00    0.17
  -9   1 -11    0.07    0.19
   9   1  11   -0.09    0.18
  10  -1  11    0.95    0.18
 -10  -1 -11    1.59    0.23
  10   1  11    0.96    0.19
 -10   1 -11    1.12    0.21
 -11  -1 -11    4.14    0.40
  11  -1  11    3.93    0.40
 -11   1 -11    4.81    0.37
  11  -2 -11   -0.23    0.22
  11  -2 -11    0.08    0.18
  11   2 -11   -0.26    0.28
  10  -2 -11    3.24    0.34
 -10  -2  11    3.96    0.42
  10  -2 -11    4.46    0.33
  10   2 -11    4.12    0.31
 -10   2  11    4.18    0.35
  10   2 -11    4.09    0.42
   9  -2 -11   11.00    0.45
   9  -2 -11   10.90    0.44
  -9  -2  11   11.94    0.48
   9   2 -11    9.41    0.48
   9   2 -11   11.58    0.52
  -9   2  11   10.61    0.42
   8  -2 -11    4.65    0.33
   8  -2 -11    3.85    0.33
  -8  -2  11    3.46    0.38
   8   2 -11    4.32    0.38
  -8   2  11    4.31    0.31
   8   2 -11    3.61    0.40
   7  -2 -11    0.33    0.18
  -7  -2  11    0.34    0.19
   7  -2 -11    0.28    0.19
   7   2 -11    0.14    0.21
  -7   2  11    0.26    0.15
   7   2 -11    0.00    0.19
  -6  -2  11    2.57    0.24
   6  -2 -11    2.65    0.21
   6   2 -11    2.43    0.23
   6   2 -11    2.72    0.25
  -6   2  11    2.58    0.21
   5  -2 -11    3.69    0.33
  -5  -2  11    3.09    0.35
  -5   2  11    4.33    0.31
   5   2 -11    3.31    0.37
   5   2 -11    3.47    0.37
   4  -2 -11    1.06    0.20
  -4  -2  11    0.93    0.20
  -4   2  11    1.02    0.18
   4   2 -11    0.91    0.22
   4   2 -11    0.98    0.22
   3  -2 -11   31.72    0.88
  -3  -2  11   32.42    0.89
   3   2 -11   27.23    1.10
   3   2 -11   33.48    0.90
  -3   2  11   32.49    0.87
   2  -2 -11    1.78    0.20
  -2  -2  11    1.65    0.19
  -2   2  11    1.81    0.19
   2   2 -11    1.95    0.22
   1  -2 -11    1.19    0.20
  -1  -2  11    1.33    0.19
  -1   2  11    1.20    0.18
   1   2 -11    1.43    0.21
   0  -2 -11   56.44    1.48
   0  -2  11   56.76    1.47
   0   2  11   57.30    1.47
   0   2 -11   57.07    1.47
   1  -2  11    4.05    0.37
  -1  -2 -11    4.28    0.35
  -1   2 -11    4.45    0.33
   1   2  11    4.27    0.33
   2  -2  11    6.89    0.35
  -2  -2 -11    7.47    0.40
  -2   2 -11    6.76    0.37
   2   2  11    7.15    0.37
  -3  -2 -11    0.08    0.20
   3  -2  11    0.18    0.16
   3   2  11   -0.06    0.18
  -3   2 -11    0.04    0.17
   4  -2  11    0.20    0.16
  -4   2 -11    0.43    0.32
   4   2  11    0.15    0.17
   5  -2  11    5.01    0.32
  -5  -2 -11    4.70    0.37
  -5   2 -11    4.73    0.35
   5   2  11    5.37    0.36
  -6  -2 -11   12.34    0.48
   6  -2  11   11.30    0.44
   6   2  11   11.06    0.46
  -6   2 -11   11.49    0.45
   7  -2  11   19.14    0.60
  -7  -2 -11   19.70    0.65
  -7   2 -11   19.46    0.61
   7   2  11   19.73    0.62
  -8  -2 -11    0.78    0.22
   8  -2  11    1.05    0.18
   8   2  11    1.13    0.20
  -8   2 -11    0.99    0.19
   9  -2  11    0.42    0.18
  -9  -2 -11    0.37    0.23
   9   2  11    0.29    0.20
  -9   2 -11    0.34    0.19
  10  -2  11    2.82    0.26
 -10  -2 -11    1.80    0.25
  10   2  11    2.24    0.31
 -10   2 -11    2.32    0.22
 -11  -2 -11    0.25    0.23
  11  -2  11    0.40    0.18
 -11   2 -11    0.13    0.20
  11  -3 -11    2.64    0.23
 -11  -3  11    2.96    0.30
  11   3 -11    2.37    0.30
  10  -3 -11    0.12    0.16
 -10  -3  11    0.07    0.22
 -10   3  11    0.33    0.20
  10   3 -11    0.58    0.25
   9  -3 -11    3.69    0.31
   9  -3 -11    3.57    0.34
  -9  -3  11    3.50    0.27
   9   3 -11    3.58    0.28
  -9   3  11    3.98    0.30
   9   3 -11    4.56    0.45
   8  -3 -11   -0.01    0.19
  -8  -3  11    0.51    0.21
   8  -3 -11   -0.16    0.16
  -8   3  11    0.15    0.16
   8   3 -11    0.07    0.39
   8   3 -11    0.06    0.20
   7  -3 -11   -0.27    0.16
  -7  -3  11    0.12    0.21
   7   3 -11   -0.11    0.19
  -7   3  11   -0.15    0.15
   7   3 -11    0.26    0.23
   6  -3 -11    0.74    0.18
  -6  -3  11    0.50    0.19
  -6   3  11    0.40    0.16
   6   3 -11    0.70    0.21
   6   3 -11    0.89    0.22
   5  -3 -11    1.20    0.19
  -5  -3  11    1.07    0.28
   5   3 -11    0.82    0.21
  -5   3  11    1.07    0.17
   4  -3 -11   -0.27    0.18
   4   3 -11   -0.04    0.19
  -4   3  11    0.09    0.15
   4   3 -11    0.04    0.20
   3  -3 -11   51.37    1.32
  -3   3  11   49.25    1.31
   3   3 -11   50.48    1.33
   3   3 -11   49.83    1.35
   2  -3 -11   47.18    1.24
   2   3 -11   46.87    1.25
  -2   3  11   46.25    1.23
   2   3 -11   47.00    1.24
   1  -3 -11   19.57    0.61
  -1  -3  11   16.20    0.82
   1   3 -11   20.16    0.62
  -1   3  11   19.86    0.60
   1   3 -11   19.18    0.61
   0  -3  11   -0.07    0.17
   0  -3 -11    0.50    0.19
   0   3  11    0.14    0.16
   0   3 -11    0.20    0.18
  -1  -3 -11    1.40    0.20
   1  -3  11    1.17    0.17
   1   3  11    1.28    0.20
  -1   3 -11    1.10    0.19
  -2  -3 -11   -0.08    0.20
   2  -3  11   -0.06    0.16
  -2   3 -11    0.02    0.18
   2   3  11   -0.03    0.23
   3  -3  11    0.09    0.15
  -3  -3 -11    0.07    0.19
   3   3  11    0.11    0.19
  -3   3 -11   -0.09    0.21
   4  -3  11    0.57    0.16
  -4  -3 -11    0.58    0.20
   4   3  11    0.66    0.21
  -4   3 -11    0.35    0.19
  -5  -3 -11    0.33    0.20
   5  -3  11    0.06    0.16
   5   3  11    0.20    0.19
  -5   3 -11    0.23    0.17
   6  -3  11    5.89    0.32
  -6  -3 -11    6.24    0.40
  -6   3 -11    5.31    0.34
   6   3  11    5.69    0.37
   7  -3  11    5.50    0.31
  -7  -3 -11    5.22    0.40
   7   3  11    4.92    0.37
  -7   3 -11    5.45    0.33
  -8  -3 -11    2.69    0.28
   8  -3  11    2.94    0.28
   8   3  11    3.53    0.33
  -8   3 -11    2.74    0.30
  -9  -3 -11    0.95    0.23
   9  -3  11    0.66    0.15
  -9   3 -11    0.87    0.19
   9   3  11    0.51    0.20
  10  -3  11    0.21    0.16
 -10  -3 -11   -0.23    0.23
 -10   3 -11    0.05    0.18
  11  -3  11    1.44    0.17
 -11   3 -11    1.53    0.20
  11  -4 -11    1.34    0.20
  10  -4 -11    0.84    0.18
 -10  -4  11    0.81    0.23
  10  -4 -11    0.93    0.17
 -10   4  11    0.98    0.22
  10   4 -11    0.47    0.27
  -9  -4  11    0.39    0.20
   9  -4 -11    0.19    0.17
   9  -4 -11    0.27    0.16
   9   4 -11    0.32    0.25
   9   4 -11    0.09    0.21
  -9   4  11    0.03    0.16
   8  -4 -11    3.84    0.31
  -8  -4  11    3.88    0.42
   8  -4 -11    4.01    0.32
  -8   4  11    3.55    0.28
   8   4 -11    3.48    0.38
   8   4 -11    3.87    0.31
   7  -4 -11    2.69    0.29
  -7  -4  11    2.48    0.27
  -7   4  11    2.08    0.19
   7   4 -11    2.34    0.27
   7   4 -11    2.07    0.23
   6  -4 -11    0.24    0.18
  -6  -4  11    0.10    0.20
  -6   4  11    0.20    0.15
   6   4 -11   -0.21    0.22
   6   4 -11    0.03    0.21
  -5  -4  11    0.62    0.18
   5  -4 -11    0.75    0.19
   5   4 -11    0.61    0.21
  -5   4  11    0.87    0.17
   5   4 -11    0.61    0.24
   4  -4 -11    0.60    0.18
  -4  -4  11    0.24    0.20
  -4   4  11   -0.04    0.17
   4   4 -11    0.37    0.20
   3  -4 -11    8.09    0.40
  -3  -4  11    8.00    0.42
   3   4 -11    7.54    0.51
   3   4 -11    7.99    0.44
  -3   4  11    7.85    0.38
  -2  -4  11    3.07    0.32
   2  -4 -11    3.52    0.34
  -2   4  11    3.20    0.32
   2   4 -11    2.61    0.24
   2   4 -11    2.44    0.24
   1  -4 -11    2.13    0.23
  -1  -4  11    2.52    0.22
   1   4 -11    1.90    0.21
  -1   4  11    1.86    0.20
   1   4 -11    2.26    0.22
   0  -4  11    7.11    0.36
   0  -4 -11    6.94    0.40
   0   4 -11    6.02    0.43
   0   4 -11    6.72    0.38
   0   4  11    7.02    0.39
  -1  -4 -11   10.38    0.47
   1  -4  11   10.56    0.41
   1   4  11   10.74    0.45
  -1   4 -11   10.51    0.44
  -1   4 -11    8.88    0.63
   2  -4  11   16.42    0.52
  -2  -4 -11   16.35    0.57
   2   4  11   14.81    0.63
  -2   4 -11   14.44    0.58
  -3  -4 -11   -0.25    0.33
   3  -4  11   -0.11    0.15
  -3   4 -11    0.10    0.18
   3   4  11   -0.02    0.20
  -4  -4 -11    0.83    0.22
   4  -4  11    0.77    0.17
  -4   4 -11    0.80    0.19
   4   4  11    0.75    0.20
  -5  -4 -11    2.61    0.25
   5  -4  11    2.56    0.20
  -5   4 -11    2.91    0.31
   5   4  11    2.62    0.23
  -6  -4 -11   -0.05    0.22
   6  -4  11   -0.05    0.14
   6   4  11    0.38    0.20
  -6   4 -11    0.12    0.16
  -7  -4 -11    0.72    0.24
   7  -4  11    0.61    0.16
   7   4  11    1.01    0.21
  -7   4 -11    0.62    0.18
  -8  -4 -11    2.56    0.28
   8  -4  11    2.30    0.25
  -8   4 -11    2.76    0.30
   8   4  11    2.57    0.24
  -9  -4 -11    0.83    0.24
   9  -4  11    0.29    0.15
   9   4  11    0.44    0.24
  -9   4 -11    0.45    0.17
 -10  -4 -11    0.58    0.26
  10  -4  11    0.76    0.15
 -10   4 -11    0.28    0.17
  10  -5 -11    0.29    0.17
 -10  -5  11    0.55    0.23
  10   5 -11    0.74    0.29
  -9  -5  11    4.19    0.40
   9  -5 -11    4.04    0.29
   9  -5 -11    3.68    0.31
  -9   5  11    3.80    0.32
   9   5 -11    4.66    0.49
   9   5 -11    4.18    0.50
  -8  -5  11    0.03    0.21
   8  -5 -11    0.41    0.16
   8   5 -11    0.71    0.27
  -8   5  11    0.12    0.15
   8   5 -11    0.15    0.23
  -7  -5  11    0.04    0.21
   7  -5 -11    0.16    0.16
   7   5 -11   -0.12    0.24
   7   5 -11    0.12    0.19
  -7   5  11   -0.13    0.14
   6  -5 -11    0.25    0.16
  -6  -5  11    0.22    0.23
   6   5 -11    0.29    0.23
  -6   5  11   -0.07    0.15
   6   5 -11    0.05    0.22
   5  -5 -11    0.42    0.18
  -5  -5  11    0.67    0.20
   5   5 -11    0.61    0.23
  -5   5  11    0.49    0.15
   5   5 -11    0.52    0.22
   4  -5 -11    8.04    0.38
  -4  -5  11    6.91    0.41
   4   5 -11    6.96    0.43
  -4   5  11    6.86    0.35
   4   5 -11    6.67    0.42
   3  -5 -11    0.11    0.18
  -3  -5  11   -0.08    0.18
   3   5 -11   -0.06    0.19
  -3   5  11   -0.07    0.16
   3   5 -11   -0.08    0.20
   2  -5 -11   17.42    0.59
  -2  -5  11   17.50    0.58
   2   5 -11   16.68    0.59
  -2   5  11   16.86    0.56
  -1  -5  11   -0.34    0.17
   1  -5 -11    0.41    0.20
   1   5 -11   -0.10    0.20
   1   5 -11   -0.13    0.19
  -1   5  11    0.00    0.19
   0  -5  11    5.88    0.35
   0  -5 -11    6.07    0.41
   0   5 -11    5.87    0.39
   0   5  11    6.26    0.39
   0   5 -11    5.99    0.37
   1  -5  11    0.03    0.17
  -1  -5 -11    0.06    0.21
  -1   5 -11    0.09    0.18
   1   5  11    0.22    0.20
  -1   5 -11   -0.34    0.18
  -2  -5 -11    1.56    0.22
   2  -5  11    1.99    0.19
  -2   5 -11    2.15    0.22
  -2   5 -11    1.75    0.20
   2   5  11    1.67    0.20
  -3  -5 -11    7.85    0.45
   3  -5  11    7.64    0.36
   3   5  11    8.10    0.42
  -3   5 -11    7.66    0.38
  -3   5 -11    8.14    0.39
   4  -5  11    0.49    0.17
  -4  -5 -11    0.46    0.21
   4   5  11    0.54    0.21
  -4   5 -11    0.42    0.16
  -4   5 -11    0.71    0.18
   5  -5  11    0.90    0.16
  -5  -5 -11    0.64    0.23
   5   5  11    0.58    0.20
  -5   5 -11    0.83    0.17
  -5   5 -11    0.68    0.18
   6  -5  11    0.20    0.15
  -6  -5 -11    0.29    0.24
   6   5  11    0.36    0.20
  -6   5 -11    0.39    0.16
  -6   5 -11    0.35    0.17
   7  -5  11    1.30    0.16
  -7  -5 -11    1.33    0.26
  -7   5 -11    1.83    0.19
  -7   5 -11    1.25    0.17
   7   5  11    1.07    0.22
   8  -5  11    0.11    0.14
  -8  -5 -11    0.06    0.22
   8   5  11    0.14    0.20
  -8   5 -11   -0.05    0.16
  -8   5 -11    0.27    0.16
  -9  -5 -11    0.94    0.26
   9  -5  11    0.53    0.15
  -9   5 -11    0.55    0.16
  -9   5 -11    0.31    0.21
  10  -5  11    0.14    0.14
 -10   5 -11    0.35    0.15
   9  -6 -11    4.64    0.38
   9  -6 -11    4.30    0.31
  -9  -6  11    4.69    0.42
  -9   6  11    4.72    0.41
   9   6 -11    5.79    0.52
   8  -6 -11   25.14    0.72
  -8  -6  11   24.80    0.80
   8   6 -11   24.61    0.82
   8   6 -11   26.44    0.85
  -8   6  11   24.78    0.71
  -7  -6  11    3.07    0.29
   7  -6 -11    3.47    0.29
   7   6 -11    3.79    0.42
  -7   6  11    2.99    0.27
   7   6 -11    3.15    0.30
   6  -6 -11    0.80    0.18
  -6  -6  11    0.57    0.22
   6   6 -11    0.68    0.25
   6   6 -11    0.68    0.22
  -6   6  11    0.65    0.17
   5  -6 -11    3.45    0.33
  -5  -6  11    3.39    0.38
   5   6 -11    3.29    0.28
  -5   6  11    3.64    0.30
   5   6 -11    3.61    0.29
   4  -6 -11    5.52    0.38
  -4  -6  11    6.49    0.41
  -4   6  11    6.20    0.34
   4   6 -11    6.07    0.42
   4   6 -11    5.90    0.46
  -3  -6  11   32.44    0.93
   3  -6 -11   31.94    0.92
   3   6 -11   33.69    0.97
  -3   6  11   33.01    0.91
   3   6 -11   32.74    0.94
  -2  -6  11    1.61    0.21
   2  -6 -11    1.67    0.22
  -2   6  11    1.14    0.20
   2   6 -11    1.09    0.23
   2   6 -11    1.24    0.22
  -1  -6  11    7.58    0.38
   1  -6 -11    7.61    0.42
  -1   6  11    7.35    0.39
   1   6 -11    6.98    0.40
   1   6 -11    7.36    0.43
   0  -6 -11    0.25    0.20
   0  -6  11   -0.07    0.17
   0   6  11   -0.25    0.20
   0   6 -11    0.36    0.19
   0   6 -11   -0.29    0.19
   1  -6  11   33.99    0.93
  -1  -6 -11   34.11    0.97
  -1   6 -11   32.95    0.95
   1   6  11   33.92    1.07
  -1   6 -11   34.18    0.94
  -2  -6 -11   19.29    1.00
   2  -6  11   23.61    0.68
   2   6  11   23.32    0.72
  -2   6 -11   23.50    0.69
  -2   6 -11   22.80    0.68
  -3  -6 -11    0.70    0.24
   3  -6  11    0.82    0.17
  -3   6 -11    0.45    0.17
   3   6  11    0.48    0.22
  -3   6 -11    0.34    0.18
   4  -6  11   -0.26    0.14
  -4  -6 -11   -0.29    0.23
   4   6  11    0.15    0.19
  -4   6 -11    0.10    0.16
  -4   6 -11    0.06    0.18
  -5  -6 -11    2.07    0.27
   5  -6  11    2.30    0.20
   5   6  11    2.24    0.23
  -5   6 -11    2.24    0.21
  -5   6 -11    2.44    0.20
  -6  -6 -11    4.65    0.46
   6  -6  11    4.95    0.30
  -6   6 -11    4.68    0.33
  -6   6 -11    5.68    0.31
   6   6  11    4.81    0.40
   7  -6  11    5.60    0.29
  -7  -6 -11    5.61    0.46
   7   6  11    4.32    0.41
  -7   6 -11    4.69    0.31
  -7   6 -11    5.21    0.31
  -8  -6 -11   -0.07    0.25
   8  -6  11    0.21    0.13
   8   6  11    0.32    0.34
  -8   6 -11    0.33    0.18
  -8   6 -11   -0.11    0.15
  -9  -6 -11    0.41    0.28
   9  -6  11    0.10    0.15
  -9   6 -11   -0.04    0.14
  -9  -7  11   11.02    0.53
   9  -7 -11   10.27    0.42
   9   7 -11   11.65    0.63
   8  -7 -11    1.81    0.18
  -8  -7  11    1.38    0.26
  -8   7  11    1.90    0.22
   8   7 -11    1.57    0.31
  -7  -7  11    5.45    0.44
   7  -7 -11    5.60    0.33
   7   7 -11    6.05    0.50
   7   7 -11    4.50    0.44
  -7   7  11    5.46    0.33
  -6  -7  11    2.61    0.26
   6  -7 -11    2.96    0.30
   6   7 -11    1.83    0.25
   6   7 -11    2.87    0.30
  -6   7  11    2.81    0.28
   5  -7 -11    2.51    0.22
  -5  -7  11    2.82    0.24
  -5   7  11    2.91    0.30
   5   7 -11    2.47    0.27
   5   7 -11    2.40    0.28
  -4  -7  11    0.24    0.21
   4  -7 -11    0.47    0.19
   4   7 -11    0.18    0.24
  -4   7  11    0.09    0.17
   4   7 -11   -0.15    0.22
  -3  -7  11    0.14    0.21
   3  -7 -11    0.24    0.20
  -3   7  11    0.14    0.18
   3   7 -11    0.27    0.22
   3   7 -11    0.19    0.25
  -2  -7  11    8.43    0.43
   2  -7 -11    8.61    0.43
  -2   7  11    8.65    0.41
   2   7 -11    8.63    0.50
   2   7 -11    8.88    0.45
   1  -7 -11    0.39    0.21
  -1  -7  11    0.28    0.18
   1   7 -11    0.53    0.20
   1   7 -11    0.31    0.38
  -1   7  11    0.18    0.19
   0  -7 -11   -0.13    0.21
   0  -7  11   -0.15    0.16
   0   7 -11    0.17    0.21
   0   7  11    0.30    0.20
   0   7 -11   -0.01    0.19
  -1  -7 -11   12.97    0.56
   1  -7  11   12.42    0.46
  -1   7 -11   13.35    0.50
  -1   7 -11   12.79    0.51
   1   7  11   12.24    0.53
   2  -7  11    9.64    0.40
  -2  -7 -11   10.58    0.52
  -2   7 -11    9.28    0.43
  -2   7 -11    9.19    0.43
   2   7  11    9.55    0.50
  -3  -7 -11   16.95    0.63
   3  -7  11   16.52    0.53
  -3   7 -11   15.65    0.54
  -3   7 -11   15.76    0.55
   3   7  11   15.96    0.61
   4  -7  11    0.12    0.16
  -4  -7 -11    0.03    0.25
  -4   7 -11    0.24    0.17
  -4   7 -11    0.03    0.17
   4   7  11   -0.20    0.21
   5  -7  11    1.91    0.19
  -5  -7 -11    1.31    0.28
  -5   7 -11    1.56    0.19
  -5   7 -11    1.94    0.20
   5   7  11    1.78    0.25
  -6  -7 -11    0.31    0.24
   6  -7  11    0.42    0.15
  -6   7 -11    0.21    0.17
  -6   7 -11    0.06    0.16
   6   7  11   -0.06    0.20
   7  -7  11    1.37    0.16
  -7  -7 -11    0.79    0.26
  -7   7 -11    1.15    0.17
  -7   7 -11    1.05    0.19
   7   7  11    0.88    0.22
   8  -7  11    1.92    0.18
  -8  -7 -11    1.60    0.31
  -8   7 -11    2.11    0.18
   8   8 -11    6.64    0.55
   7  -8 -11    4.07    0.32
  -7  -8  11    4.64    0.44
   7   8 -11    4.59    0.43
   7   8 -11    4.75    0.50
  -7   8  11    5.00    0.41
   6  -8 -11    0.14    0.16
  -6  -8  11    0.53    0.21
   6   8 -11    0.56    0.27
  -6   8  11    0.35    0.20
   6   8 -11    0.60    0.25
  -5  -8  11    0.63    0.22
   5  -8 -11    0.38    0.20
   5   8 -11    0.36    0.24
  -5   8  11    0.13    0.17
   5   8 -11    0.41    0.24
   4  -8 -11    0.29    0.18
  -4  -8  11    0.87    0.23
   4   8 -11    0.77    0.26
   4   8 -11    0.54    0.25
  -4   8  11    0.63    0.18
  -3  -8  11    3.51    0.37
   3  -8 -11    3.33    0.37
  -3   8  11    3.41    0.25
   3   8 -11    3.83    0.41
   3   8 -11    3.03    0.29
   2  -8 -11    0.20    0.21
  -2  -8  11    0.21    0.18
   2   8 -11    0.57    0.22
  -2   8  11    0.27    0.21
   2   8 -11    0.11    0.24
  -1  -8  11    0.05    0.17
   1  -8 -11    0.15    0.22
   1   8 -11   -0.02    0.21
   1   8 -11   -0.09    0.20
  -1   8  11   -0.22    0.18
   0  -8 -11    0.28    0.23
   0  -8  11    0.03    0.17
   0   8  11    0.32    0.23
[truncated: 108,115 more chars]
