# Supplementary material for: Multicomponent Synthesis of Luminescent Iminoboronates
Source: Molecules. 2020 Dec 21;25(24):6039. doi: 10.3390/molecules25246039 (PMC7766465; doi:10.3390/molecules25246039)
Supplement: Supplementary file 1 [file molecules-25-06039-s001.zip › 1e.cif]

 
data_shelx
 
_audit_creation_method            SHELXL-2014
_chemical_name_systematic
;
 10,12-dimethoxy-7-phenyl-5H,7H-7\l4,14\l4-benzo[d]benzo[5,6][1,3,2]oxazaborinino[2,3-b][1,3,2]oxazaborinin-5-one
;
_chemical_name_common             ?
_chemical_melting_point           ?
_chemical_formula_moiety         'C22 H18 B N O5'
_chemical_formula_sum
 'C22 H18 B N O5' 
_chemical_formula_weight          387.18

loop_
 _atom_type_symbol
 _atom_type_description
 _atom_type_scat_dispersion_real
 _atom_type_scat_dispersion_imag
 _atom_type_scat_source
 'C'  'C'   0.0033   0.0016
 'International Tables Vol C Tables 4.2.6.8 and 6.1.1.4'
 'H'  'H'   0.0000   0.0000
 'International Tables Vol C Tables 4.2.6.8 and 6.1.1.4'
 'B'  'B'   0.0013   0.0007
 'International Tables Vol C Tables 4.2.6.8 and 6.1.1.4'
 'N'  'N'   0.0061   0.0033
 'International Tables Vol C Tables 4.2.6.8 and 6.1.1.4'
 'O'  'O'   0.0106   0.0060
 'International Tables Vol C Tables 4.2.6.8 and 6.1.1.4'
 
_space_group_crystal_system       monoclinic
_space_group_IT_number            14
_space_group_name_H-M_alt         'P 21/c'
_space_group_name_Hall            '-P 2ybc'
 
_shelx_space_group_comment
;
The symmetry employed for this shelxl refinement is uniquely defined
by the following loop, which should always be used as a source of
symmetry information in preference to the above space-group names.
They are only intended as comments.
;
 
loop_
 _space_group_symop_operation_xyz
 'x, y, z'
 '-x, y+1/2, -z+1/2'
 '-x, -y, -z'
 'x, -y-1/2, z-1/2'
 
_cell_length_a                    8.8820(6)
_cell_length_b                    11.6380(7)
_cell_length_c                    18.0177(10)
_cell_angle_alpha                 90
_cell_angle_beta                  100.305(2)
_cell_angle_gamma                 90
_cell_volume                      1832.42(19)
_cell_formula_units_Z             4
_cell_measurement_temperature     150(2)
_cell_measurement_reflns_used     3645 
_cell_measurement_theta_min       2.298 
_cell_measurement_theta_max       29.160 
 
_exptl_crystal_description        needle 
_exptl_crystal_colour             yellow
_exptl_crystal_density_meas       ? 
_exptl_crystal_density_method     ?              
_exptl_crystal_density_diffrn     1.403          
_exptl_crystal_F_000              808
_exptl_transmission_factor_min    0.6874                                             
_exptl_transmission_factor_max    0.7458                                             
_exptl_crystal_size_max           0.400
_exptl_crystal_size_mid           0.060
_exptl_crystal_size_min           0.050
_exptl_absorpt_coefficient_mu     0.099
_shelx_estimated_absorpt_T_min    0.962
_shelx_estimated_absorpt_T_max    0.995
_exptl_absorpt_correction_type    multi-scan 
_exptl_absorpt_correction_T_min   ? 
_exptl_absorpt_correction_T_max   ? 
_exptl_absorpt_process_details    '(SADABS; Bruker, 2008)' 
 
_exptl_special_details
;
 ?
;
 
_diffrn_ambient_temperature       150(2)
_diffrn_radiation_wavelength      0.71073
_diffrn_radiation_type            MoK\a
_diffrn_source                    'fine-focus sealed tube'                       
_diffrn_measurement_device_type   "ccd" 
_diffrn_measurement_method        "omega and phi scans" 
_diffrn_detector_area_resol_mean  ? 
_diffrn_reflns_number             26133
_diffrn_reflns_av_unetI/netI      0.0625
_diffrn_reflns_av_R_equivalents   0.0722
_diffrn_reflns_limit_h_min        -12
_diffrn_reflns_limit_h_max        12
_diffrn_reflns_limit_k_min        -15
_diffrn_reflns_limit_k_max        15
_diffrn_reflns_limit_l_min        -24
_diffrn_reflns_limit_l_max        23
_diffrn_reflns_theta_min          2.298
_diffrn_reflns_theta_max          29.160
_diffrn_reflns_theta_full         25.242
_diffrn_measured_fraction_theta_max   0.998
_diffrn_measured_fraction_theta_full  1.000
_diffrn_reflns_Laue_measured_fraction_max    0.998
_diffrn_reflns_Laue_measured_fraction_full   1.000
_diffrn_reflns_point_group_measured_fraction_max   0.998
_diffrn_reflns_point_group_measured_fraction_full  1.000
_reflns_number_total              4934
_reflns_number_gt                 3368
_reflns_threshold_expression      'I > 2\s(I)'
_reflns_Friedel_coverage          0.000
_reflns_Friedel_fraction_max      .
_reflns_Friedel_fraction_full     .
 
_reflns_special_details
;
 Reflections were merged by SHELXL according to the crystal
 class for the calculation of statistics and refinement.
 
 _reflns_Friedel_fraction is defined as the number of unique
 Friedel pairs measured divided by the number that would be
 possible theoretically, ignoring centric projections and
 systematic absences.
;
 
_computing_data_collection        'Bruker SMART'
_computing_cell_refinement        'Bruker SMART'
_computing_data_reduction         'Bruker SAINT'
_computing_structure_solution     'SHELXS-97 (Sheldrick, 2008)'
_computing_structure_refinement   'SHELXL-97 (Sheldrick, 2008)'
_computing_molecular_graphics     'PLATON (Spek, 2009)'
_computing_publication_material   'SHELXL-97 (Sheldrick, 2008)'
 
_refine_special_details
;
 ?
;
_refine_ls_structure_factor_coef  Fsqd
_refine_ls_matrix_type            full
_refine_ls_weighting_scheme       calc
_refine_ls_weighting_details
'w=1/[\s^2^(Fo^2^)+(0.0477P)^2^+0.7234P] where P=(Fo^2^+2Fc^2^)/3'
_atom_sites_solution_primary      direct
_atom_sites_solution_secondary    difmap
_atom_sites_solution_hydrogens    geom
_refine_ls_hydrogen_treatment     constr
_refine_ls_extinction_method      none
_refine_ls_extinction_coef        .
_refine_ls_number_reflns          4934
_refine_ls_number_parameters      264
_refine_ls_number_restraints      0
_refine_ls_R_factor_all           0.1052
_refine_ls_R_factor_gt            0.0600
_refine_ls_wR_factor_ref          0.1243
_refine_ls_wR_factor_gt           0.1091
_refine_ls_goodness_of_fit_ref    1.063
_refine_ls_restrained_S_all       1.063
_refine_ls_shift/su_max           0.000
_refine_ls_shift/su_mean          0.000
 
loop_
 _atom_site_label
 _atom_site_type_symbol
 _atom_site_fract_x
 _atom_site_fract_y
 _atom_site_fract_z
 _atom_site_U_iso_or_equiv
 _atom_site_adp_type
 _atom_site_occupancy
 _atom_site_site_symmetry_order  
 _atom_site_calc_flag
 _atom_site_refinement_flags_posn
 _atom_site_refinement_flags_adp
 _atom_site_refinement_flags_occupancy
 _atom_site_disorder_assembly
 _atom_site_disorder_group
O1 O 0.12682(13) 0.05429(10) 0.12698(6) 0.0178(3) Uani 1 1 d . . . . .
N1 N 0.27011(15) 0.08893(11) 0.02346(7) 0.0133(3) Uani 1 1 d . . . . .
O2 O 0.20558(14) 0.24257(10) 0.10877(6) 0.0189(3) Uani 1 1 d . . . . .
O5 O -0.06209(15) -0.32188(11) 0.15799(7) 0.0281(3) Uani 1 1 d . . . . .
O4 O 0.19339(14) -0.23940(10) -0.04522(7) 0.0211(3) Uani 1 1 d . . . . .
O3 O 0.21145(14) 0.42343(10) 0.07219(7) 0.0241(3) Uani 1 1 d . . . . .
C08 C 0.23061(18) -0.01350(14) -0.00292(9) 0.0142(3) Uani 1 1 d . . . . .
H08 H 0.2490 -0.0347 -0.0514 0.017 Uiso 1 1 calc R U . . .
C09 C 0.16103(18) -0.09327(14) 0.03955(9) 0.0145(3) Uani 1 1 d . . . . .
C10 C 0.10659(18) -0.05498(14) 0.10454(9) 0.0157(3) Uani 1 1 d . . . . .
C13 C 0.06307(19) -0.28454(15) 0.05819(10) 0.0199(4) Uani 1 1 d . . . . .
H13 H 0.0497 -0.3631 0.0441 0.024 Uiso 1 1 calc R U . . .
C02 C 0.33079(18) 0.28665(14) 0.00406(9) 0.0156(3) Uani 1 1 d . . . . .
C06 C 0.42242(19) 0.14253(15) -0.07384(9) 0.0170(4) Uani 1 1 d . . . . .
H06 H 0.4285 0.0647 -0.0888 0.020 Uiso 1 1 calc R U . . .
C14 C 0.13620(19) -0.21018(15) 0.01694(9) 0.0165(3) Uani 1 1 d . . . . .
C07 C 0.34104(18) 0.17173(14) -0.01718(9) 0.0146(3) Uani 1 1 d . . . . .
C03 C 0.4021(2) 0.37094(15) -0.03213(10) 0.0208(4) Uani 1 1 d . . . . .
H03 H 0.3933 0.4493 -0.0187 0.025 Uiso 1 1 calc R U . . .
C11 C 0.02659(19) -0.12818(15) 0.14463(9) 0.0189(4) Uani 1 1 d . . . . .
H11 H -0.0145 -0.1011 0.1866 0.023 Uiso 1 1 calc R U . . .
C04 C 0.4853(2) 0.34250(16) -0.08714(10) 0.0233(4) Uani 1 1 d . . . . .
H04 H 0.5359 0.4006 -0.1104 0.028 Uiso 1 1 calc R U . . .
C12 C 0.00843(19) -0.24209(16) 0.12154(10) 0.0201(4) Uani 1 1 d . . . . .
C05 C 0.4945(2) 0.22830(15) -0.10820(10) 0.0212(4) Uani 1 1 d . . . . .
H05 H 0.5507 0.2086 -0.1465 0.025 Uiso 1 1 calc R U . . .
C01 C 0.24411(19) 0.32321(14) 0.06391(9) 0.0171(4) Uani 1 1 d . . . . .
C021 C 0.4284(2) 0.00560(16) 0.21547(9) 0.0203(4) Uani 1 1 d . . . . .
H021 H 0.3403 -0.0384 0.2198 0.024 Uiso 1 1 calc R U . . .
B1 B 0.2543(2) 0.12117(16) 0.10742(10) 0.0151(4) Uani 1 1 d . . . . .
C023 C 0.5478(2) 0.15800(17) 0.16015(11) 0.0262(4) Uani 1 1 d . . . . .
H023 H 0.5435 0.2197 0.1253 0.031 Uiso 1 1 calc R U . . .
C024 C 0.41453(19) 0.09586(14) 0.16334(9) 0.0164(3) Uani 1 1 d . . . . .
C15 C 0.1680(2) -0.35489(15) -0.07275(11) 0.0259(4) Uani 1 1 d . . . . .
H15A H 0.2066 -0.4092 -0.0322 0.039 Uiso 1 1 calc R U . . .
H15B H 0.2220 -0.3669 -0.1150 0.039 Uiso 1 1 calc R U . . .
H15C H 0.0582 -0.3674 -0.0898 0.039 Uiso 1 1 calc R U . . .
C026 C 0.5674(2) -0.02159(17) 0.26122(10) 0.0258(4) Uani 1 1 d . . . . .
H026 H 0.5732 -0.0841 0.2955 0.031 Uiso 1 1 calc R U . . .
C16 C -0.1246(2) -0.28654(19) 0.22264(11) 0.0320(5) Uani 1 1 d . . . . .
H16A H -0.0416 -0.2607 0.2625 0.048 Uiso 1 1 calc R U . . .
H16B H -0.1778 -0.3515 0.2411 0.048 Uiso 1 1 calc R U . . .
H16C H -0.1969 -0.2234 0.2084 0.048 Uiso 1 1 calc R U . . .
C028 C 0.6967(2) 0.04204(18) 0.25681(11) 0.0296(5) Uani 1 1 d . . . . .
H028 H 0.7916 0.0239 0.2881 0.036 Uiso 1 1 calc R U . . .
C029 C 0.6867(2) 0.13223(19) 0.20643(12) 0.0337(5) Uani 1 1 d . . . . .
H029 H 0.7749 0.1769 0.2033 0.040 Uiso 1 1 calc R U . . .
 
loop_
 _atom_site_aniso_label
 _atom_site_aniso_U_11
 _atom_site_aniso_U_22
 _atom_site_aniso_U_33
 _atom_site_aniso_U_23
 _atom_site_aniso_U_13
 _atom_site_aniso_U_12
O1 0.0172(6) 0.0205(6) 0.0172(6) -0.0030(5) 0.0071(5) -0.0017(5)
N1 0.0117(7) 0.0148(7) 0.0135(7) 0.0002(5) 0.0026(5) -0.0002(5)
O2 0.0216(6) 0.0192(6) 0.0172(6) -0.0014(5) 0.0064(5) 0.0036(5)
O5 0.0300(8) 0.0315(8) 0.0245(7) 0.0097(6) 0.0094(6) -0.0089(6)
O4 0.0268(7) 0.0159(6) 0.0233(6) -0.0025(5) 0.0118(5) -0.0020(5)
O3 0.0289(7) 0.0161(6) 0.0273(7) -0.0054(5) 0.0054(5) 0.0025(5)
C08 0.0129(8) 0.0168(8) 0.0131(8) -0.0003(6) 0.0027(6) 0.0017(6)
C09 0.0114(8) 0.0168(8) 0.0154(8) 0.0024(6) 0.0025(6) 0.0011(6)
C10 0.0108(8) 0.0201(9) 0.0154(8) 0.0016(7) 0.0002(6) 0.0002(6)
C13 0.0190(9) 0.0187(9) 0.0212(9) 0.0037(7) 0.0014(7) -0.0034(7)
C02 0.0126(8) 0.0169(8) 0.0161(8) -0.0004(7) -0.0009(6) 0.0002(6)
C06 0.0162(8) 0.0166(8) 0.0186(8) -0.0005(7) 0.0042(7) 0.0000(7)
C14 0.0139(8) 0.0183(8) 0.0172(8) 0.0019(7) 0.0022(7) 0.0012(7)
C07 0.0127(8) 0.0172(8) 0.0129(8) 0.0020(6) -0.0004(6) -0.0011(6)
C03 0.0195(9) 0.0145(8) 0.0273(9) 0.0001(7) 0.0013(7) -0.0006(7)
C11 0.0150(8) 0.0288(10) 0.0136(8) 0.0015(7) 0.0044(7) -0.0009(7)
C04 0.0208(9) 0.0219(9) 0.0278(10) 0.0076(8) 0.0056(8) -0.0047(7)
C12 0.0157(9) 0.0270(10) 0.0171(8) 0.0093(7) 0.0016(7) -0.0041(7)
C05 0.0192(9) 0.0251(10) 0.0206(9) 0.0032(7) 0.0068(7) -0.0015(7)
C01 0.0146(8) 0.0175(9) 0.0178(8) -0.0030(7) -0.0007(7) -0.0008(7)
C021 0.0216(9) 0.0254(10) 0.0146(8) -0.0019(7) 0.0049(7) -0.0005(7)
B1 0.0164(9) 0.0170(9) 0.0132(9) -0.0019(7) 0.0059(7) 0.0000(7)
C023 0.0229(10) 0.0286(10) 0.0253(10) 0.0056(8) -0.0004(8) -0.0035(8)
C024 0.0185(8) 0.0195(9) 0.0115(8) -0.0039(7) 0.0037(6) 0.0015(7)
C15 0.0285(10) 0.0179(9) 0.0331(11) -0.0060(8) 0.0103(8) -0.0003(8)
C026 0.0314(11) 0.0305(11) 0.0146(9) 0.0017(8) 0.0014(8) 0.0066(8)
C16 0.0263(10) 0.0469(13) 0.0246(10) 0.0124(9) 0.0098(8) -0.0072(9)
C028 0.0220(10) 0.0431(12) 0.0214(10) 0.0010(9) -0.0026(8) 0.0048(9)
C029 0.0200(10) 0.0454(13) 0.0329(11) 0.0052(10) -0.0026(8) -0.0082(9)
 
_geom_special_details
;
 All esds (except the esd in the dihedral angle between two l.s. planes)
 are estimated using the full covariance matrix.  The cell esds are taken
 into account individually in the estimation of esds in distances, angles
 and torsion angles; correlations between esds in cell parameters are only
 used when they are defined by crystal symmetry.  An approximate (isotropic)
 treatment of cell esds is used for estimating esds involving l.s. planes.
;
 
loop_
 _geom_bond_atom_site_label_1
 _geom_bond_atom_site_label_2
 _geom_bond_distance
 _geom_bond_site_symmetry_2
 _geom_bond_publ_flag
O1 C10 1.337(2) . ?
O1 B1 1.468(2) . ?
N1 C08 1.308(2) . ?
N1 C07 1.424(2) . ?
N1 B1 1.589(2) . ?
O2 C01 1.323(2) . ?
O2 B1 1.479(2) . ?
O5 C12 1.354(2) . ?
O5 C16 1.437(2) . ?
O4 C14 1.353(2) . ?
O4 C15 1.436(2) . ?
O3 C01 1.218(2) . ?
C08 C09 1.414(2) . ?
C09 C10 1.416(2) . ?
C09 C14 1.426(2) . ?
C10 C11 1.391(2) . ?
C13 C14 1.377(2) . ?
C13 C12 1.407(3) . ?
C02 C03 1.391(2) . ?
C02 C07 1.399(2) . ?
C02 C01 1.494(2) . ?
C06 C05 1.390(2) . ?
C06 C07 1.394(2) . ?
C03 C04 1.378(3) . ?
C11 C12 1.390(3) . ?
C04 C05 1.389(3) . ?
C021 C026 1.393(3) . ?
C021 C024 1.400(2) . ?
B1 C024 1.617(2) . ?
C023 C029 1.393(3) . ?
C023 C024 1.397(2) . ?
C026 C028 1.381(3) . ?
C028 C029 1.380(3) . ?
 
loop_
 _geom_angle_atom_site_label_1
 _geom_angle_atom_site_label_2
 _geom_angle_atom_site_label_3
 _geom_angle
 _geom_angle_site_symmetry_1
 _geom_angle_site_symmetry_3
 _geom_angle_publ_flag
C10 O1 B1 119.97(13) . . ?
C08 N1 C07 123.00(14) . . ?
C08 N1 B1 119.84(13) . . ?
C07 N1 B1 116.90(13) . . ?
C01 O2 B1 124.00(13) . . ?
C12 O5 C16 118.43(15) . . ?
C14 O4 C15 117.52(14) . . ?
N1 C08 C09 121.11(15) . . ?
C08 C09 C10 119.20(15) . . ?
C08 C09 C14 122.15(15) . . ?
C10 C09 C14 118.56(15) . . ?
O1 C10 C11 118.62(15) . . ?
O1 C10 C09 120.13(15) . . ?
C11 C10 C09 121.21(16) . . ?
C14 C13 C12 118.78(17) . . ?
C03 C02 C07 119.24(16) . . ?
C03 C02 C01 118.28(15) . . ?
C07 C02 C01 122.47(15) . . ?
C05 C06 C07 119.45(16) . . ?
O4 C14 C13 124.88(16) . . ?
O4 C14 C09 114.48(14) . . ?
C13 C14 C09 120.62(16) . . ?
C06 C07 C02 120.07(15) . . ?
C06 C07 N1 123.14(15) . . ?
C02 C07 N1 116.75(14) . . ?
C04 C03 C02 121.01(16) . . ?
C12 C11 C10 118.12(16) . . ?
C03 C04 C05 119.45(17) . . ?
O5 C12 C11 123.23(16) . . ?
O5 C12 C13 114.15(16) . . ?
C11 C12 C13 122.62(16) . . ?
C04 C05 C06 120.75(17) . . ?
O3 C01 O2 120.76(16) . . ?
O3 C01 C02 121.73(16) . . ?
O2 C01 C02 117.50(14) . . ?
C026 C021 C024 121.99(17) . . ?
O1 B1 O2 105.20(13) . . ?
O1 B1 N1 107.86(13) . . ?
O2 B1 N1 108.49(13) . . ?
O1 B1 C024 112.62(14) . . ?
O2 B1 C024 113.03(14) . . ?
N1 B1 C024 109.41(13) . . ?
C029 C023 C024 122.03(18) . . ?
C023 C024 C021 116.27(16) . . ?
C023 C024 B1 122.54(15) . . ?
C021 C024 B1 121.11(15) . . ?
C028 C026 C021 120.17(18) . . ?
C029 C028 C026 119.29(18) . . ?
C028 C029 C023 120.23(19) . . ?
 
_refine_diff_density_max    0.368
_refine_diff_density_min   -0.275
_refine_diff_density_rms    0.060

_shelxl_version_number 2014-3

_shelx_res_file
;
TITL SG815 in P2(1)/c
CELL  0.71073   8.8820  11.6380  18.0177   90.000  100.305   90.000
ZERR     4.00   0.0006   0.0007   0.0010    0.000    0.002    0.000
LATT   1
SYMM  - X, 1/2 + Y, 1/2 - Z
SFAC  C    H    B    N    O
UNIT  88   72   4    4    20
MERG   2
FMAP   2
PLAN   20
SIZE     0.050   0.060   0.400
ACTA
BOND
L.S.  99
TEMP  -123.00
WGHT    0.047700    0.723400
FVAR       0.10438
MOLE    1
O1    5    0.126822    0.054289    0.126977    11.00000    0.01723    0.02049 =
         0.01725   -0.00296    0.00711   -0.00165
N1    4    0.270114    0.088926    0.023459    11.00000    0.01166    0.01485 =
         0.01350    0.00024    0.00256   -0.00022
O2    5    0.205576    0.242565    0.108765    11.00000    0.02155    0.01917 =
         0.01720   -0.00144    0.00638    0.00362
O5    5   -0.062086   -0.321875    0.157985    11.00000    0.03001    0.03152 =
         0.02452    0.00967    0.00940   -0.00886
O4    5    0.193392   -0.239403   -0.045217    11.00000    0.02676    0.01595 =
         0.02331   -0.00245    0.01185   -0.00205
O3    5    0.211451    0.423432    0.072187    11.00000    0.02891    0.01614 =
         0.02731   -0.00541    0.00538    0.00249
C08   1    0.230615   -0.013497   -0.002917    11.00000    0.01291    0.01683 =
         0.01306   -0.00031    0.00274    0.00168
AFIX  43
H08   2    0.248994   -0.034656   -0.051434    11.00000   -1.20000
AFIX   0
C09   1    0.161025   -0.093265    0.039552    11.00000    0.01137    0.01678 =
         0.01536    0.00244    0.00255    0.00108
C10   1    0.106592   -0.054982    0.104538    11.00000    0.01083    0.02014 =
         0.01535    0.00162    0.00023    0.00025
C13   1    0.063066   -0.284542    0.058188    11.00000    0.01900    0.01870 =
         0.02122    0.00369    0.00141   -0.00336
AFIX  43
H13   2    0.049730   -0.363064    0.044138    11.00000   -1.20000
AFIX   0
C02   1    0.330792    0.286652    0.004063    11.00000    0.01264    0.01691 =
         0.01610   -0.00041   -0.00091    0.00017
C06   1    0.422420    0.142530   -0.073840    11.00000    0.01624    0.01664 =
         0.01862   -0.00052    0.00423    0.00005
AFIX  43
H06   2    0.428544    0.064657   -0.088829    11.00000   -1.20000
AFIX   0
C14   1    0.136203   -0.210176    0.016943    11.00000    0.01391    0.01825 =
         0.01718    0.00188    0.00224    0.00118
C07   1    0.341039    0.171727   -0.017184    11.00000    0.01268    0.01722 =
         0.01293    0.00198   -0.00045   -0.00105
C03   1    0.402074    0.370936   -0.032130    11.00000    0.01950    0.01450 =
         0.02727    0.00015    0.00131   -0.00059
AFIX  43
H03   2    0.393255    0.449278   -0.018728    11.00000   -1.20000
AFIX   0
C11   1    0.026592   -0.128179    0.144626    11.00000    0.01502    0.02884 =
         0.01365    0.00148    0.00441   -0.00095
AFIX  43
H11   2   -0.014455   -0.101079    0.186583    11.00000   -1.20000
AFIX   0
C04   1    0.485294    0.342500   -0.087135    11.00000    0.02078    0.02189 =
         0.02784    0.00760    0.00559   -0.00465
AFIX  43
H04   2    0.535925    0.400552   -0.110437    11.00000   -1.20000
AFIX   0
C12   1    0.008430   -0.242086    0.121543    11.00000    0.01572    0.02700 =
         0.01714    0.00925    0.00162   -0.00408
C05   1    0.494510    0.228304   -0.108204    11.00000    0.01919    0.02514 =
         0.02058    0.00316    0.00679   -0.00153
AFIX  43
H05   2    0.550727    0.208583   -0.146540    11.00000   -1.20000
AFIX   0
C01   1    0.244111    0.323208    0.063910    11.00000    0.01458    0.01747 =
         0.01782   -0.00300   -0.00066   -0.00084
C021  1    0.428380    0.005601    0.215472    11.00000    0.02163    0.02544 =
         0.01458   -0.00194    0.00491   -0.00050
AFIX  43
H021  2    0.340297   -0.038440    0.219777    11.00000   -1.20000
AFIX   0
B1    3    0.254287    0.121172    0.107419    11.00000    0.01640    0.01703 =
         0.01320   -0.00193    0.00595   -0.00005
C023  1    0.547800    0.158003    0.160152    11.00000    0.02291    0.02856 =
         0.02526    0.00558   -0.00044   -0.00351
AFIX  43
H023  2    0.543530    0.219744    0.125347    11.00000   -1.20000
AFIX   0
C024  1    0.414532    0.095863    0.163338    11.00000    0.01855    0.01947 =
         0.01155   -0.00389    0.00367    0.00153
C15   1    0.168032   -0.354894   -0.072747    11.00000    0.02845    0.01794 =
         0.03313   -0.00597    0.01032   -0.00031
AFIX 137
H15A  2    0.206650   -0.409165   -0.032210    11.00000   -1.50000
H15B  2    0.221969   -0.366868   -0.115046    11.00000   -1.50000
H15C  2    0.058174   -0.367442   -0.089767    11.00000   -1.50000
AFIX   0
C026  1    0.567388   -0.021592    0.261221    11.00000    0.03141    0.03054 =
         0.01459    0.00175    0.00144    0.00665
AFIX  43
H026  2    0.573239   -0.084071    0.295549    11.00000   -1.20000
AFIX   0
C16   1   -0.124563   -0.286539    0.222640    11.00000    0.02629    0.04689 =
         0.02465    0.01245    0.00980   -0.00725
AFIX 137
H16A  2   -0.041589   -0.260693    0.262517    11.00000   -1.50000
H16B  2   -0.177767   -0.351462    0.241056    11.00000   -1.50000
H16C  2   -0.196938   -0.223366    0.208435    11.00000   -1.50000
AFIX   0
C028  1    0.696743    0.042037    0.256809    11.00000    0.02196    0.04315 =
         0.02141    0.00096   -0.00259    0.00483
AFIX  43
H028  2    0.791600    0.023917    0.288119    11.00000   -1.20000
AFIX   0
C029  1    0.686735    0.132225    0.206432    11.00000    0.02001    0.04536 =
         0.03293    0.00523   -0.00260   -0.00822
AFIX  43
H029  2    0.774917    0.176882    0.203308    11.00000   -1.20000
AFIX   0
HKLF    4

REM  SG815 in P2(1)/c
REM R1 =  0.0600 for    3368 Fo > 4sig(Fo)  and  0.1052 for all    4934 data
REM    264 parameters refined using      0 restraints

END

WGHT      0.0477      0.7234

REM Highest difference peak  0.368,  deepest hole -0.275,  1-sigma level  0.060
Q1    1   0.3424  0.0973  0.1247  11.00000  0.05    0.37
Q2    1   0.2897  0.3017  0.0300  11.00000  0.05    0.30
Q3    1   0.0699 -0.2454  0.0253  11.00000  0.05    0.28
Q4    1   0.2646  0.1073  0.0679  11.00000  0.05    0.28
Q5    1   0.4096  0.1397 -0.0287  11.00000  0.05    0.27
Q6    1   0.4565  0.2939 -0.1131  11.00000  0.05    0.26
Q7    1   0.0236 -0.0853  0.1090  11.00000  0.05    0.26
Q8    1   0.5181 -0.0224  0.2157  11.00000  0.05    0.26
Q9    1   0.3439  0.1627 -0.0600  11.00000  0.05    0.25
Q10   1  -0.1202 -0.3986  0.2287  11.00000  0.05    0.25
Q11   1   0.6032  0.1575  0.2004  11.00000  0.05    0.25
Q12   1   0.3057  0.1344  0.0041  11.00000  0.05    0.25
Q13   1   0.1903 -0.0421  0.0260  11.00000  0.05    0.24
Q14   1   0.2988  0.2380 -0.0190  11.00000  0.05    0.24
Q15   1   0.1273 -0.2389  0.0503  11.00000  0.05    0.24
Q16   1   0.1599 -0.1543  0.0319  11.00000  0.05    0.23
Q17   1   0.0234 -0.2540  0.0833  11.00000  0.05    0.23
Q18   1   0.4693  0.0575 -0.0549  11.00000  0.05    0.23
Q19   1   0.4224  0.1979 -0.1021  11.00000  0.05    0.22
Q20   1   0.1437 -0.0797  0.0747  11.00000  0.05    0.22
;
_shelx_res_checksum   39095

_shelx_hkl_file
;
   1   0   0    0.43    0.06
  -1   0   0    0.62    0.08
  -1   0   0    0.58    0.08
   2   0   0    8.89    0.31
   2   0   0    8.79    0.32
   2   0   0    8.72    0.34
  -2   0   0    8.71    0.32
  -2   0   0    8.93    0.32
   3   0   0   62.16    1.80
   3   0   0   62.34    1.77
  -3   0   0   63.14    1.78
   3   0   0   62.06    1.77
  -3   0   0   67.84    1.79
  -4   0   0    5.06    0.30
   4   0   0    5.54    0.33
  -4   0   0    4.80    0.29
   4   0   0    5.20    0.28
   4   0   0    5.02    0.28
   5   0   0    6.61    0.41
   5   0   0    6.36    0.36
   5   0   0    6.42    0.36
  -5   0   0    6.42    0.38
  -5   0   0    6.68    0.38
  -6   0   0    0.86    0.22
   6   0   0    0.96    0.20
  -6   0   0    0.88    0.23
   6   0   0    0.49    0.22
   6   0   0    0.75    0.19
  -7   0   0    1.57    0.30
   7   0   0    1.86    0.26
  -7   0   0    2.09    0.31
   7   0   0    2.12    0.35
   7   0   0    1.38    0.26
   8   0   0    0.53    0.25
   8   0   0    0.54    0.33
  -8   0   0    0.43    0.30
   8   0   0    1.05    0.37
  -8   0   0    0.42    0.27
   9   0   0    3.75    0.48
  -9   0   0    3.89    0.49
  -9   0   0    3.11    0.42
   9   0   0    3.13    0.41
 -10   0   0    0.25    0.38
  10   0   0    0.81    0.41
 -11   0   0    6.32    0.85
  11   0   0    3.95    0.63
  11   0   0    4.69    0.68
   1  -1   0   42.07    1.10
   1  -1   0   44.28    1.11
  -1  -1   0   42.25    1.11
  -1  -1   0   37.61    1.14
   1   1   0   36.39    1.13
  -1   1   0   41.28    1.10
   1   1   0   40.00    1.12
  -1   1   0   41.67    1.11
  -2  -1   0   53.00    1.46
   2  -1   0   53.21    1.44
   2  -1   0   50.96    1.44
  -2  -1   0   52.19    1.46
  -2  -1   0   51.79    1.45
   2   1   0   52.54    1.46
   2   1   0   53.71    1.46
  -2   1   0   52.65    1.45
   2   1   0   51.56    1.45
  -2   1   0   52.10    1.44
   3  -1   0    0.37    0.09
  -3  -1   0    0.18    0.11
  -3  -1   0    0.27    0.11
   3  -1   0    0.28    0.12
  -3  -1   0    0.22    0.11
   3  -1   0    0.36    0.10
   3   1   0    0.24    0.10
   3   1   0    0.19    0.14
  -3   1   0    0.39    0.10
  -3   1   0    0.26    0.11
   3   1   0    0.19    0.11
   4  -1   0    0.04    0.09
  -4  -1   0    0.00    0.11
  -4  -1   0    0.00    0.11
   4  -1   0   -0.07    0.10
   4  -1   0    0.01    0.13
  -4  -1   0    0.06    0.11
   4   1   0    0.04    0.13
   4   1   0   -0.21    0.09
  -4   1   0   -0.05    0.11
   4   1   0   -0.01    0.10
  -4   1   0    0.03    0.10
   5  -1   0    4.58    0.37
  -5  -1   0    4.75    0.33
   5  -1   0    4.41    0.30
  -5  -1   0    4.30    0.34
   5  -1   0    4.92    0.31
   5   1   0    4.60    0.36
   5   1   0    4.81    0.32
  -5   1   0    4.89    0.33
   5   1   0    4.99    0.33
  -5   1   0    4.44    0.32
   6  -1   0    0.55    0.17
   6  -1   0    0.51    0.22
  -6  -1   0    0.66    0.19
  -6  -1   0    0.71    0.22
   6  -1   0    0.54    0.18
  -6   1   0    0.48    0.21
  -6   1   0    0.44    0.19
   6   1   0    0.51    0.22
   6   1   0    0.72    0.19
   6   1   0    0.64    0.19
  -7  -1   0   10.99    0.60
   7  -1   0   10.17    0.52
   7  -1   0    8.64    0.80
   7  -1   0   10.63    0.65
  -7  -1   0   10.00    0.60
   7   1   0   10.94    0.63
  -7   1   0    9.95    0.59
  -7   1   0   10.94    0.67
   7   1   0   10.07    0.56
   7   1   0   10.93    0.56
   8  -1   0    3.43    0.39
   8  -1   0    3.06    0.43
   8  -1   0    4.43    0.62
  -8  -1   0    3.68    0.49
  -8  -1   0    2.76    0.39
  -8   1   0    3.44    0.47
   8   1   0    3.12    0.42
  -8   1   0    3.07    0.42
   8   1   0    2.88    0.36
   9  -1   0   -0.09    0.28
   9  -1   0   -0.38    0.23
  -9  -1   0    0.11    0.31
   9  -1   0    0.03    0.60
  -9  -1   0   -0.53    0.35
  -9   1   0    0.11    0.31
   9   1   0   -0.63    0.26
  -9   1   0   -0.67    0.34
   9   1   0   -0.38    0.30
  10  -1   0    1.08    0.34
  10  -1   0    1.46    0.41
 -10  -1   0    2.14    0.45
  10   1   0    1.83    0.44
  10   1   0    1.16    0.37
 -10   1   0    0.97    0.41
  11  -1   0    0.79    0.38
 -11  -1   0    1.09    0.52
  11  -1   0    1.17    0.56
 -11   1   0    0.87    0.50
  11   1   0   -0.03    0.42
  11   1   0   -0.65    0.60
   0  -2   0   56.86    1.60
   0   2   0   62.77    1.61
  -1  -2   0   35.14    0.96
   1  -2   0   36.09    0.96
  -1  -2   0   34.88    0.99
  -1   2   0   33.78    0.96
   1   2   0   34.65    0.97
   1   2   0   34.88    0.99
  -2  -2   0   12.67    0.43
  -2  -2   0   12.69    0.45
   2  -2   0   12.79    0.41
  -2  -2   0   12.57    0.42
   2   2   0   12.38    0.44
   2   2   0   12.33    0.43
  -2   2   0   12.67    0.42
  -3  -2   0    0.89    0.14
   3  -2   0    0.72    0.10
   3  -2   0    0.87    0.12
  -3  -2   0    0.62    0.12
  -3   2   0    0.75    0.12
   3   2   0    0.77    0.13
   3   2   0    0.63    0.12
  -3   2   0    0.49    0.12
  -4  -2   0    6.44    0.36
   4  -2   0    6.44    0.37
   4  -2   0    6.01    0.30
  -4  -2   0    6.09    0.34
  -4  -2   0    5.90    0.32
   4  -2   0    6.33    0.29
  -4   2   0    5.69    0.31
   4   2   0    5.99    0.33
  -4   2   0    5.41    0.32
   4   2   0    5.77    0.33
  -5  -2   0    0.31    0.17
  -5  -2   0    0.30    0.17
   5  -2   0    0.03    0.11
  -5  -2   0    0.23    0.15
   5  -2   0    0.16    0.13
   5  -2   0    0.08    0.21
  -5   2   0    0.03    0.15
   5   2   0    0.10    0.14
  -5   2   0    0.20    0.15
   5   2   0    0.05    0.14
   6  -2   0   21.30    0.88
  -6  -2   0   22.01    0.82
  -6  -2   0   21.11    0.84
   6  -2   0   22.04    0.78
   6  -2   0   22.04    0.75
   6   2   0   20.00    0.80
  -6   2   0   20.98    0.81
   6   2   0   20.86    0.80
  -6   2   0   22.55    0.82
  -7  -2   0   12.82    0.69
   7  -2   0   13.19    0.60
  -7  -2   0   13.34    0.67
   7  -2   0   12.31    0.72
   7  -2   0   12.26    0.56
   7   2   0   13.54    0.64
  -7   2   0   13.41    0.74
   7   2   0   13.25    0.64
  -7   2   0   12.65    0.65
   8  -2   0    0.16    0.20
  -8  -2   0   -0.03    0.30
   8  -2   0    0.75    0.35
   8  -2   0   -0.03    0.22
  -8  -2   0    0.07    0.26
  -8   2   0    0.00    0.25
   8   2   0    0.45    0.26
   8   2   0   -0.10    0.27
  -8   2   0   -0.01    0.28
  -9  -2   0    0.22    0.33
  -9  -2   0    0.00    0.49
   9  -2   0    0.78    0.25
   9  -2   0    0.18    0.44
   9   2   0    0.16    0.33
  -9   2   0    0.64    0.41
  -9   2   0    0.32    0.31
   9   2   0    0.22    0.31
 -10  -2   0   -0.13    0.39
  10  -2   0   -0.22    0.27
  10  -2   0    0.93    0.38
  10   2   0   -0.25    0.42
  10   2   0    0.46    0.36
 -10   2   0    0.20    0.37
 -11  -2   0    0.38    0.50
  11  -2   0    0.09    0.43
 -11   2   0    0.18    0.48
  11   2   0    0.47    0.44
   0  -3   0    0.01    0.06
   0  -3   0   -0.09    0.06
   0   3   0    0.07    0.08
   0   3   0    0.01    0.06
  -1  -3   0    3.39    0.20
   1  -3   0    3.32    0.18
  -1  -3   0    3.62    0.18
   1  -3   0    3.69    0.17
   1   3   0    3.98    0.18
   1   3   0    3.59    0.20
  -1   3   0    3.41    0.18
  -1   3   0    3.49    0.17
  -2  -3   0    4.19    0.24
   2  -3   0    3.55    0.20
  -2  -3   0    4.19    0.21
   2  -3   0    3.99    0.19
  -2   3   0    4.04    0.22
   2   3   0    3.89    0.23
  -2   3   0    3.97    0.20
   2   3   0    3.84    0.22
  -3  -3   0    5.04    0.26
  -3  -3   0    4.61    0.27
   3  -3   0    4.79    0.25
   3  -3   0    4.76    0.22
  -3   3   0    4.72    0.25
   3   3   0    5.09    0.28
   3   3   0    4.89    0.27
  -3   3   0    4.97    0.26
   4  -3   0   19.58    0.67
  -4  -3   0   19.77    0.71
   4  -3   0   20.55    0.64
  -4  -3   0   20.68    0.73
  -4  -3   0   20.51    0.69
   4   3   0   20.51    0.72
  -4   3   0   20.75    0.70
  -4   3   0   19.64    0.68
   4   3   0   20.20    0.71
   5  -3   0    9.26    0.62
  -5  -3   0    9.71    0.50
   5  -3   0   10.13    0.41
   5  -3   0    9.71    0.44
  -5  -3   0   10.44    0.51
  -5  -3   0    9.03    0.54
   5   3   0   10.42    0.49
  -5   3   0    9.79    0.46
  -5   3   0   10.06    0.47
   5   3   0   10.38    0.49
   6  -3   0    0.22    0.14
   6  -3   0    0.07    0.40
  -6  -3   0   -0.05    0.20
  -6  -3   0    0.07    0.21
   6  -3   0    0.31    0.17
  -6  -3   0   -0.18    0.18
  -6   3   0    0.19    0.20
  -6   3   0    0.17    0.18
   6   3   0    0.02    0.18
   6   3   0    0.20    0.19
   7  -3   0    6.95    0.39
   7  -3   0    6.55    0.45
  -7  -3   0    7.00    0.52
  -7  -3   0    6.33    0.54
   7  -3   0    6.70    0.58
  -7   3   0    7.58    0.52
   7   3   0    6.93    0.51
  -7   3   0    7.29    0.53
   7   3   0    6.83    0.51
   8  -3   0    3.79    0.36
  -8  -3   0    4.02    0.69
   8  -3   0    4.54    0.44
   8  -3   0    2.47    0.47
  -8  -3   0    3.52    0.52
   8   3   0    3.25    0.39
  -8   3   0    3.71    0.45
  -8   3   0    3.25    0.48
   8   3   0    4.20    0.51
   9  -3   0   -0.16    0.22
   9  -3   0   -0.08    0.28
  -9  -3   0   -0.25    0.33
   9   3   0   -0.24    0.35
  -9   3   0    0.33    0.34
   9   3   0    0.34    0.32
  -9   3   0   -0.32    0.40
  10  -3   0    0.23    0.37
  10  -3   0   -0.37    0.26
 -10  -3   0    0.09    0.40
  10   3   0    0.11    0.38
 -10   3   0   -0.21    0.37
  10   3   0    0.25    0.52
 -11  -3   0    0.64    0.52
  11  -3   0    0.13    0.35
  11   3   0    0.18    0.47
 -11   3   0    1.34    0.49
   0  -4   0    0.08    0.08
   0  -4   0   -0.01    0.06
   0   4   0    0.04    0.07
   0   4   0   -0.01    0.07
   1  -4   0   12.85    0.43
  -1  -4   0   12.53    0.43
   1  -4   0   12.91    0.43
  -1  -4   0   12.74    0.46
   1   4   0   13.10    0.46
   1   4   0   13.42    0.43
  -1   4   0   13.39    0.42
  -1   4   0   13.80    0.44
   2  -4   0    1.00    0.12
  -2  -4   0    1.21    0.18
   2  -4   0    0.97    0.12
  -2  -4   0    1.09    0.14
   2   4   0    1.04    0.15
  -2   4   0    0.90    0.12
  -2   4   0    1.00    0.12
   2   4   0    1.14    0.16
   3  -4   0   12.96    0.43
  -3  -4   0   12.07    0.51
  -3  -4   0   12.31    0.46
   3  -4   0   12.52    0.45
  -3   4   0   12.70    0.47
   3   4   0   12.74    0.50
  -3   4   0   12.66    0.46
  -4  -4   0    0.12    0.14
  -4  -4   0    0.02    0.11
   4  -4   0    0.32    0.10
   4  -4   0    0.05    0.11
  -4  -4   0    0.08    0.13
   4   4   0    0.15    0.13
   4   4   0    0.15    0.12
  -4   4   0    0.06    0.12
  -4   4   0    0.00    0.13
   5  -4   0   -0.05    0.13
  -5  -4   0    0.05    0.16
  -5  -4   0    0.03    0.17
  -5  -4   0    0.16    0.16
   5  -4   0    0.13    0.10
  -5   4   0    0.24    0.15
   5   4   0    0.30    0.17
  -5   4   0    0.20    0.17
   5   4   0    0.16    0.17
   6  -4   0    1.74    0.34
  -6  -4   0    1.76    0.28
  -6  -4   0    2.11    0.32
  -6  -4   0    1.99    0.29
   6  -4   0    1.89    0.24
   6  -4   0    1.78    0.23
  -6   4   0    1.79    0.27
  -6   4   0    1.45    0.26
   6   4   0    2.07    0.34
   6   4   0    1.74    0.28
  -7  -4   0    3.88    0.48
  -7  -4   0    4.32    0.45
   7  -4   0    3.68    0.47
   7  -4   0    4.53    0.32
   7  -4   0    4.22    0.40
  -7   4   0    3.26    0.43
   7   4   0    3.45    0.46
  -7   4   0    3.83    0.47
   7   4   0    4.80    0.47
   8  -4   0    0.26    0.17
  -8  -4   0    0.31    0.30
  -8  -4   0   -0.36    0.28
   8  -4   0    0.69    0.38
   8  -4   0    0.98    0.43
   8   4   0    0.03    0.27
  -8   4   0    0.08    0.28
   8   4   0    0.25    0.31
  -8   4   0    0.01    0.32
   9  -4   0    5.06    0.55
   9  -4   0    5.60    0.42
  -9  -4   0    5.28    0.67
  -9   4   0    4.49    0.57
   9   4   0    3.81    0.57
  -9   4   0    5.02    0.60
   9   4   0    5.34    0.69
 -10  -4   0    1.31    0.49
  10  -4   0    1.59    0.31
  10   4   0    1.75    0.44
 -10   4   0    0.83    0.42
 -11  -4   0    0.56    0.54
  11  -4   0   -0.34    0.32
  11   4   0    1.00    0.52
 -11   4   0    0.28    0.47
   0  -5   0    0.01    0.07
   0  -5   0   -0.08    0.08
   0   5   0    0.00    0.07
   0   5   0    0.13    0.09
   1  -5   0   -0.01    0.08
  -1  -5   0    0.02    0.08
  -1  -5   0   -0.01    0.08
   1  -5   0   -0.02    0.07
   1   5   0    0.09    0.10
  -1   5   0    0.04    0.08
   1   5   0    0.04    0.08
  -1   5   0    0.00    0.08
   2  -5   0    2.65    0.21
  -2  -5   0    3.31    0.20
   2  -5   0    2.88    0.19
  -2  -5   0    3.08    0.25
  -2   5   0    2.80    0.20
  -2   5   0    2.87    0.20
   2   5   0    2.78    0.24
   2   5   0    3.01    0.22
  -3  -5   0    0.42    0.13
  -3  -5   0    0.57    0.16
   3  -5   0    0.55    0.10
   3  -5   0    0.50    0.13
  -3   5   0    0.53    0.12
   3   5   0    0.52    0.15
   3   5   0    0.56    0.16
  -3   5   0    0.42    0.13
   4  -5   0    5.81    0.33
   4  -5   0    6.60    0.29
  -4  -5   0    6.02    0.35
  -4  -5   0    6.44    0.36
  -4  -5   0    5.56    0.39
   4   5   0    6.17    0.38
   4   5   0    5.75    0.44
  -4   5   0    6.36    0.36
  -4   5   0    6.28    0.35
  -5  -5   0    1.46    0.24
   5  -5   0    1.50    0.21
  -5  -5   0    2.04    0.28
   5  -5   0    1.47    0.21
  -5  -5   0    1.02    0.23
  -5   5   0    1.29    0.23
   5   5   0    1.99    0.27
  -5   5   0    1.81    0.35
   5   5   0    1.00    0.20
  -6  -5   0    0.60    0.26
   6  -5   0    0.83    0.32
   6  -5   0    1.12    0.21
  -6  -5   0    0.83    0.22
  -6  -5   0    0.91    0.27
   6  -5   0    1.03    0.17
   6   5   0    1.01    0.25
  -6   5   0    0.84    0.23
   6   5   0    0.99    0.28
  -6   5   0    1.29    0.25
  -7  -5   0    2.17    0.36
  -7  -5   0    2.21    0.34
   7  -5   0    1.83    0.40
   7  -5   0    1.93    0.23
   7  -5   0    2.35    0.28
  -7  -5   0    2.31    0.36
  -7   5   0    2.19    0.34
  -7   5   0    2.55    0.34
   7   5   0    2.20    0.35
   7   5   0    2.01    0.34
   8  -5   0    0.17    0.18
   8  -5   0   -0.28    0.30
  -8  -5   0    0.31    0.31
  -8  -5   0   -0.37    0.28
   8  -5   0   -0.55    0.38
   8   5   0    0.25    0.29
  -8   5   0   -0.27    0.33
   8   5   0   -0.33    0.31
  -8   5   0    0.42    0.27
   9  -5   0   -0.11    0.21
   9  -5   0    0.44    0.31
  -9  -5   0    0.34    0.37
   9   5   0   -0.21    0.34
  -9   5   0    0.14    0.56
  -9   5   0    0.05    0.34
  10  -5   0    0.61    0.26
 -10  -5   0    1.27    0.49
 -10   5   0    1.22    0.42
  10   5   0    0.70    0.43
 -11  -5   0   -0.31    0.56
 -11   5   0    1.25    0.50
  11   5   0    0.75    0.53
   0  -6   0    8.29    0.36
   0  -6   0    7.78    0.32
   0   6   0    7.99    0.35
   0   6   0    8.07    0.33
  -1  -6   0   28.74    0.91
   1  -6   0   29.02    0.85
   1  -6   0   28.17    0.87
  -1   6   0   27.74    0.88
   1   6   0   27.92    0.86
  -1   6   0   28.34    0.86
   1   6   0   27.85    0.90
  -2  -6   0   19.54    0.71
   2  -6   0   20.12    0.65
  -2  -6   0   20.04    0.64
   2  -6   0   19.78    0.65
   2   6   0   18.42    0.66
   2   6   0   18.84    0.69
  -2   6   0   20.24    0.64
  -2   6   0   19.88    0.66
  -3  -6   0    8.26    0.41
   3  -6   0    7.48    0.37
  -3  -6   0    8.16    0.44
   3  -6   0    8.32    0.35
   3   6   0    7.48    0.49
  -3   6   0    8.23    0.38
  -3   6   0    7.94    0.36
   3   6   0    8.46    0.40
  -4  -6   0    0.44    0.17
   4  -6   0    0.30    0.12
   4  -6   0    0.23    0.14
  -4  -6   0    0.43    0.18
  -4  -6   0    0.53    0.16
   4   6   0    0.57    0.17
  -4   6   0    0.17    0.16
   4   6   0    0.36    0.18
  -4   6   0    0.25    0.15
  -5  -6   0    2.25    0.30
   5  -6   0    3.32    0.25
   5  -6   0    2.91    0.31
  -5  -6   0    3.47    0.34
  -5  -6   0    3.72    0.35
  -5   6   0    3.47    0.34
  -5   6   0    3.08    0.34
   5   6   0    2.98    0.36
   5   6   0    3.37    0.39
  -6  -6   0    3.35    0.37
   6  -6   0    2.83    0.27
  -6  -6   0    3.88    0.42
  -6  -6   0    3.13    0.44
   6  -6   0    2.91    0.41
   6  -6   0    3.29    0.33
  -6   6   0    2.89    0.40
  -6   6   0    2.72    0.52
   6   6   0    3.18    0.40
   6   6   0    3.04    0.43
  -7  -6   0    0.16    0.24
  -7  -6   0   -0.39    0.25
   7  -6   0    0.00    0.22
   7  -6   0    0.13    0.16
  -7  -6   0    0.44    0.27
   7  -6   0   -0.53    0.34
  -7   6   0    0.08    0.23
  -7   6   0    0.48    0.30
   7   6   0    0.76    0.47
   7   6   0    0.18    0.30
   8  -6   0    0.81    0.28
  -8  -6   0    0.21    0.35
   8  -6   0    0.77    0.21
   8   6   0    0.75    0.34
   8   6   0    0.20    0.39
  -8   6   0    0.40    0.39
   9  -6   0    0.72    0.23
  -9  -6   0    0.05    0.40
   9   6   0    1.44    0.40
  -9   6   0    0.88    0.34
  10  -6   0    5.80    0.47
 -10  -6   0    7.72    0.88
  10   6   0    6.34    0.78
 -10   6   0    6.51    0.74
 -11   6   0    0.75    0.51
  11   6   0    0.87    0.58
   0  -7   0   -0.09    0.10
   0  -7   0    0.07    0.11
   0   7   0    0.06    0.10
   0   7   0    0.03    0.12
   1  -7   0   -0.01    0.11
  -1  -7   0    0.28    0.11
   1  -7   0    0.14    0.12
  -1  -7   0    0.05    0.13
   1   7   0    0.13    0.11
   1   7   0    0.04    0.13
  -1   7   0    0.07    0.11
  -2  -7   0    4.87    0.30
  -2  -7   0    4.38    0.35
   2  -7   0    4.68    0.30
   2  -7   0    5.22    0.29
   2   7   0    4.67    0.31
  -2   7   0    4.74    0.30
   2   7   0    5.32    0.35
  -2   7   0    5.40    0.30
  -3  -7   0    6.79    0.44
  -3  -7   0    8.17    0.38
   3  -7   0    7.67    0.36
   3  -7   0    7.41    0.38
  -3   7   0    7.63    0.39
   3   7   0    7.58    0.41
   3   7   0    7.58    0.44
  -3   7   0    7.28    0.37
   4  -7   0    1.62    0.22
  -4  -7   0    1.36    0.32
   4  -7   0    2.16    0.22
  -4  -7   0    1.39    0.25
  -4   7   0    1.81    0.24
   4   7   0    1.55    0.24
   4   7   0    1.78    0.27
  -4   7   0    1.59    0.22
   5  -7   0    1.22    0.18
  -5  -7   0    1.27    0.30
   5  -7   0    1.32    0.22
  -5  -7   0    1.35    0.25
  -5  -7   0    1.31    0.22
  -5   7   0    1.13    0.24
  -5   7   0    1.43    0.24
   5   7   0    1.04    0.24
   5   7   0    1.24    0.27
   6  -7   0    0.53    0.20
  -6  -7   0    0.29    0.24
  -6  -7   0    0.46    0.22
  -6  -7   0    0.57    0.29
   6  -7   0    0.38    0.15
  -6   7   0    0.55    0.27
  -6   7   0    0.14    0.20
   6   7   0    0.48    0.23
   6   7   0    0.53    0.26
  -7  -7   0    5.15    0.60
   7  -7   0    4.28    0.32
  -7  -7   0    5.02    0.54
   7  -7   0    4.97    0.43
   7  -7   0    4.93    0.70
  -7  -7   0    3.90    0.49
  -7   7   0    4.61    0.47
   7   7   0    3.91    0.52
  -7   7   0    4.77    0.58
   7   7   0    4.79    0.57
   8  -7   0    0.59    0.28
   8  -7   0    0.00    0.17
  -8  -7   0    0.35    0.36
  -8   7   0   -0.11    0.42
   8   7   0    0.01    0.32
  -8   7   0    0.46    0.29
   9  -7   0    1.75    0.33
  -9  -7   0    1.52    0.49
  -9   7   0    1.85    0.39
   9   7   0    0.51    0.41
 -10  -7   0    0.22    0.54
 -10   7   0    0.41    0.41
  10   7   0    0.03    0.48
   0  -8   0    4.48    0.32
   0  -8   0    3.68    0.28
   0   8   0    4.73    0.29
   0   8   0    4.35    0.33
  -1  -8   0    4.96    0.36
  -1  -8   0    3.77    0.41
   1  -8   0    4.47    0.31
   1  -8   0    4.39    0.31
   1   8   0    4.64    0.30
  -1   8   0    4.69    0.32
  -1   8   0    4.66    0.30
   1   8   0    4.13    0.34
   2  -8   0    0.17    0.16
  -2  -8   0    0.41    0.20
   2  -8   0    0.31    0.15
  -2  -8   0    0.48    0.15
   2   8   0    0.60    0.17
   2   8   0    0.49    0.17
  -2   8   0    0.43    0.15
  -2   8   0    0.24    0.16
   3  -8   0    0.01    0.13
   3  -8   0   -0.15    0.15
  -3  -8   0   -0.08    0.19
  -3  -8   0    0.02    0.16
   3   8   0    0.16    0.17
   3   8   0   -0.04    0.20
  -3   8   0   -0.19    0.15
  -3   8   0   -0.07    0.14
  -4  -8   0    7.02    0.42
   4  -8   0    7.08    0.38
  -4  -8   0    7.58    0.53
   4  -8   0    7.44    0.43
   4   8   0    8.73    0.51
  -4   8   0    7.55    0.43
   4   8   0    7.60    0.51
  -4   8   0    7.52    0.45
   5  -8   0   22.64    0.76
  -5  -8   0   22.64    0.95
  -5  -8   0   22.11    0.85
  -5  -8   0   22.78    0.83
   5  -8   0   21.94    0.80
   5   8   0   21.04    0.91
  -5   8   0   22.83    0.82
  -5   8   0   22.85    0.88
   5   8   0   23.17    0.94
  -6  -8   0   -0.28    0.23
   6  -8   0    0.18    0.16
   6  -8   0    0.09    0.21
  -6  -8   0   -0.10    0.24
  -6  -8   0    0.60    0.31
   6   8   0   -0.01    0.26
  -6   8   0   -0.04    0.27
   6   8   0   -0.63    0.30
  -6   8   0    0.51    0.23
   7  -8   0    1.71    0.50
   7  -8   0    1.45    0.28
  -7  -8   0    1.39    0.32
  -7  -8   0    1.17    0.36
   7  -8   0    1.20    0.21
  -7   8   0    1.37    0.40
   7   8   0    1.50    0.36
  -7   8   0    1.68    0.49
   8  -8   0    1.05    0.23
  -8  -8   0    1.17    0.42
   8  -8   0    1.45    0.31
  -8   8   0    1.14    0.32
   8   8   0    1.32    0.42
  -9  -8   0    0.29    0.46
   9  -8   0    0.41    0.23
  -9   8   0    0.41    0.34
   9   8   0   -0.29    0.42
 -10  -8   0    1.48    0.65
  10   8   0    0.96    0.56
   0  -9   0   -0.07    0.16
   0  -9   0    0.13    0.16
   0   9   0   -0.22    0.23
   0   9   0    0.15    0.14
   1  -9   0    9.28    0.44
   1  -9   0    9.10    0.47
  -1  -9   0    9.32    0.51
  -1  -9   0    9.89    0.44
  -1   9   0    9.93    0.49
   1   9   0    9.82    0.51
   1   9   0    8.69    0.44
  -1   9   0    8.96    0.43
   2  -9   0    0.57    0.19
  -2  -9   0    0.62    0.23
  -2  -9   0    0.74    0.21
   2  -9   0    0.56    0.17
  -2   9   0    0.78    0.19
   2   9   0    0.78    0.24
  -2   9   0    0.82    0.22
   2   9   0    0.66    0.19
  -3  -9   0    6.98    0.51
  -3  -9   0    7.09    0.42
   3  -9   0    7.26    0.42
   3  -9   0    6.96    0.39
  -3   9   0    7.16    0.48
   3   9   0    6.87    0.46
   3   9   0    6.68    0.49
  -3   9   0    6.68    0.41
  -4  -9   0    5.02    0.38
  -4  -9   0    4.38    0.48
   4  -9   0    4.62    0.40
   4  -9   0    4.94    0.34
   4   9   0    4.78    0.51
   4   9   0    5.25    0.46
  -4   9   0    4.76    0.37
  -4   9   0    4.97    0.43
  -5  -9   0    0.25    0.22
  -5  -9   0    0.76    0.34
   5  -9   0    0.30    0.22
   5  -9   0    0.57    0.18
  -5  -9   0    0.38    0.22
  -5   9   0    0.25    0.26
   5   9   0    0.68    0.26
  -5   9   0    0.38    0.20
   5   9   0    0.75    0.32
  -6  -9   0    1.29    0.37
  -6  -9   0    1.12    0.29
   6  -9   0    1.24    0.20
  -6  -9   0    0.83    0.26
   6  -9   0    1.19    0.34
   6   9   0    0.30    0.57
   6   9   0    1.41    0.35
  -6   9   0    1.05    0.35
  -6   9   0    0.59    0.24
  -7  -9   0    0.76    0.36
   7  -9   0    1.21    0.27
   7  -9   0    0.84    0.21
  -7  -9   0    0.93    0.39
   7   9   0    1.53    0.38
  -7   9   0    1.20    0.42
  -7   9   0    0.85    0.28
  -8  -9   0    0.07    0.49
  -8  -9   0   -0.23    0.42
   8  -9   0    0.36    0.33
   8  -9   0    0.46    0.21
   8   9   0   -0.20    0.39
  -8   9   0    0.70    0.32
  -9  -9   0   -0.66    0.49
   9   9   0    0.01    0.48
  -9   9   0    0.68    0.36
   0 -10   0    3.61    0.39
   0 -10   0    3.83    0.33
   0  10   0    3.59    0.32
   0  10   0    2.72    0.37
   1 -10   0    0.26    0.19
   1 -10   0    0.27    0.18
  -1 -10   0    0.28    0.22
   1  10   0    0.12    0.21
   1  10   0    0.19    0.17
  -1  10   0    0.47    0.22
  -1  10   0    0.29    0.15
  -2 -10   0    0.56    0.20
  -2 -10   0    0.58    0.24
   2 -10   0    0.23    0.18
  -2  10   0    0.63    0.18
   2  10   0    0.69    0.21
   2  10   0    0.26    0.25
  -2  10   0    0.67    0.21
   3 -10   0    2.07    0.26
  -3 -10   0    2.41    0.34
   3 -10   0    1.99    0.27
  -3  10   0    1.91    0.26
   3  10   0    2.23    0.35
  -3  10   0    1.74    0.29
   3  10   0    1.84    0.34
   4 -10   0   -0.10    0.23
   4 -10   0    0.32    0.19
  -4 -10   0    0.17    0.21
   4  10   0    0.05    0.22
   4  10   0    0.28    0.31
  -4  10   0    0.05    0.18
  -4  10   0    0.25    0.26
   5 -10   0    0.16    0.18
  -5 -10   0    0.05    0.23
  -5 -10   0    0.07    0.28
   5 -10   0   -0.17    0.24
  -5 -10   0    0.04    0.23
  -5  10   0    0.44    0.31
   5  10   0    0.08    0.27
  -5  10   0    0.19    0.21
   6 -10   0    3.64    0.44
  -6 -10   0    2.83    0.46
   6 -10   0    2.97    0.34
  -6 -10   0    2.80    0.38
  -6  10   0    3.63    0.42
   6  10   0    2.95    0.43
  -6  10   0    3.09    0.47
   7 -10   0    0.20    0.28
   7 -10   0    0.11    0.21
  -7 -10   0   -0.15    0.41
  -7 -10   0   -0.22    0.35
  -7  10   0   -0.22    0.24
   7  10   0    0.61    0.35
  -8 -10   0    0.52    0.48
  -8 -10   0    0.32    0.47
   8  10   0    0.47    0.45
  -8  10   0    0.51    0.30
  -9 -10   0    0.68    0.57
   9  10   0    0.56    0.55
  -9  10   0    0.43    0.37
   0 -11   0    0.12    0.22
   0 -11   0    0.11    0.18
   0  11   0   -0.03    0.24
   0  11   0    0.12    0.16
   1 -11   0    0.82    0.22
  -1 -11   0    0.93    0.21
   1 -11   0    1.06    0.26
  -1 -11   0    1.14    0.28
  -1  11   0    0.64    0.27
   1  11   0    1.21    0.30
   1  11   0    0.53    0.26
  -1  11   0    0.81    0.19
   2 -11   0    3.11    0.39
  -2 -11   0    2.34    0.35
  -2 -11   0    2.49    0.29
   2 -11   0    2.72    0.37
  -2  11   0    2.79    0.34
   2  11   0    2.44    0.30
   2  11   0    2.06    0.34
  -2  11   0    2.48    0.32
   3 -11   0    1.43    0.25
   3 -11   0    1.84    0.28
  -3 -11   0    1.03    0.26
   3  11   0    1.57    0.37
   3  11   0    1.20    0.27
  -3  11   0    0.82    0.30
  -4 -11   0    0.67    0.33
  -4 -11   0    0.30    0.25
   4 -11   0    0.20    0.21
  -4  11   0    0.04    0.29
   4  11   0    0.02    0.27
  -4  11   0    0.52    0.31
   5 -11   0   -0.25    0.27
   5 -11   0    0.23    0.22
  -5 -11   0    0.03    0.26
  -5 -11   0    0.01    0.33
   5  11   0    0.18    0.31
  -5  11   0   -0.11    0.21
  -5  11   0   -0.50    0.33
   6 -11   0    1.58    0.31
  -6 -11   0    1.32    0.44
  -6 -11   0    0.73    0.33
   6 -11   0    1.19    0.25
   6  11   0    1.03    0.36
  -6  11   0    1.03    0.28
   7 -11   0    0.16    0.24
  -7 -11   0   -0.48    0.38
  -7 -11   0   -0.32    0.47
   7  11   0   -0.20    0.41
  -7  11   0    0.23    0.29
  -8 -11   0    0.35    0.54
   8  11   0    0.39    0.53
  -8  11   0    0.16    0.33
   0 -12   0    2.05    0.33
   0 -12   0    1.52    0.26
   0  12   0    1.08    0.33
   0  12   0    1.38    0.24
   1 -12   0    1.10    0.26
  -1 -12   0    0.61    0.24
  -1 -12   0    0.58    0.28
   1 -12   0    0.42    0.26
  -1  12   0    0.66    0.30
  -1  12   0    0.42    0.20
   1  12   0    1.03    0.35
   1  12   0    0.58    0.23
   2 -12   0    1.39    0.33
  -2 -12   0    1.66    0.28
   2 -12   0    1.27    0.28
   2  12   0    1.09    0.28
  -2  12   0    1.18    0.33
  -2  12   0    0.98    0.23
   3 -12   0    2.49    0.33
  -3 -12   0    2.20    0.33
   3 -12   0    2.68    0.33
  -3 -12   0    2.44    0.41
   3  12   0    1.88    0.35
  -3  12   0    2.15    0.29
  -3  12   0    2.99    0.41
  -4 -12   0    5.08    0.67
   4 -12   0    6.34    0.49
   4 -12   0    6.36    0.58
   4  12   0    4.07    0.56
  -4  12   0    5.77    0.49
  -5 -12   0    6.42    0.73
   5 -12   0    7.24    0.58
   5 -12   0    4.81    0.48
  -5 -12   0    4.98    0.53
  -5  12   0    5.80    0.51
   5  12   0    5.38    0.58
   6 -12   0    0.19    0.26
  -6 -12   0   -0.35    0.44
  -6 -12   0   -0.21    0.34
  -6  12   0   -0.18    0.27
   6  12   0    0.14    0.41
  -7 -12   0    1.39    0.53
  -7 -12   0    2.14    0.51
   7  12   0    1.45    0.53
  -7  12   0    2.07    0.39
   0 -13   0    0.06    0.31
   0 -13   0    0.01    0.27
   0  13   0   -0.05    0.21
   1 -13   0    0.63    0.32
   1 -13   0    0.81    0.30
  -1 -13   0    0.44    0.34
  -1 -13   0    0.99    0.28
  -1  13   0    0.83    0.24
   1  13   0    0.87    0.28
  -2 -13   0    0.13    0.28
  -2 -13   0   -0.58    0.34
   2 -13   0   -0.06    0.29
   2 -13   0   -0.30    0.28
  -2  13   0   -0.20    0.20
   2  13   0   -0.38    0.24
   3 -13   0    0.26    0.29
  -3 -13   0    0.61    0.39
   3 -13   0    0.15    0.39
  -3  13   0   -0.17    0.21
   3  13   0   -0.49    0.28
   4 -13   0    1.94    0.33
   4 -13   0    2.85    0.43
  -4 -13   0    1.20    0.44
   4  13   0    1.31    0.41
  -4  13   0    1.87    0.32
   5 -13   0    1.36    0.32
  -5 -13   0    1.75    0.39
  -5 -13   0    2.28    0.52
   5  13   0    0.79    0.44
  -5  13   0    1.88    0.35
  -6 -13   0   -0.06    0.42
  -6  13   0   -0.11    0.34
   6  13   0    0.56    0.48
   0 -14   0    2.09    0.43
   0 -14   0    1.04    0.35
   0  14   0    0.75    0.30
  -1 -14   0    1.00    0.39
   1 -14   0    0.09    0.35
   1 -14   0    0.99    0.36
  -1 -14   0    1.04    0.34
  -1  14   0    0.14    0.25
   1  14   0    0.07    0.27
   2 -14   0    0.81    0.37
  -2 -14   0    0.63    0.41
   2 -14   0    0.58    0.36
  -2  14   0    0.43    0.26
   2  14   0    0.53    0.33
  -3 -14   0    2.07    0.48
   3 -14   0    1.41    0.37
   3  14   0    1.23    0.40
  -3  14   0    0.96    0.29
  -4 -14   0    1.50    0.51
   4 -14   0    1.72    0.38
  -4  14   0    1.83    0.33
   4  14   0    0.70    0.44
  -5 -14   0   -0.02    0.55
   5  14   0    0.27    0.49
   0 -15   0   -0.17    0.42
   0  15   0   -0.10    0.30
   1 -15   0    1.02    0.43
  -1 -15   0    1.20    0.48
  -1  15   0    0.15    0.31
   1  15   0    1.04    0.37
  -2 -15   0    3.89    0.59
   2 -15   0    3.09    0.50
  -2  15   0    2.74    0.41
   2  15   0    3.02    0.50
  -3 -15   0   -0.58    0.49
  -3  15   0   -0.31    0.29
   3  15   0    0.23    0.44
  -4 -15   0    0.77    0.62
  -4  15   0    0.07    0.33
 -12   0   1    0.23    0.60
  12   0  -1    0.80    0.50
  11   0  -1    0.02    0.39
  11   0  -1   -0.23    0.54
 -11   0   1   -0.33    0.46
  10   0  -1    0.19    0.33
 -10   0   1    0.22    0.36
  10   0  -1   -0.09    0.41
   9   0  -1   -0.11    0.31
  -9   0   1   -0.29    0.30
  -9   0   1    0.20    0.38
   9   0  -1    0.30    0.44
   9   0  -1    0.09    0.27
  -8   0   1    0.11    0.26
   8   0  -1    0.06    0.23
  -8   0   1   -0.25    0.27
   8   0  -1   -0.07    0.25
  -7   0   1    0.17    0.21
  -7   0   1   -0.02    0.21
   7   0  -1    0.06    0.25
   7   0  -1    0.09    0.20
   7   0  -1    0.03    0.20
  -6   0   1   -0.21    0.17
   6   0  -1    0.07    0.17
   6   0  -1   -0.11    0.19
   6   0  -1   -0.21    0.14
  -6   0   1    0.09    0.19
   5   0  -1   -0.05    0.13
   5   0  -1    0.06    0.16
   5   0  -1   -0.13    0.12
  -5   0   1    0.17    0.15
  -5   0   1   -0.15    0.14
   4   0  -1   -0.14    0.10
   4   0  -1   -0.15    0.12
  -4   0   1   -0.18    0.10
  -4   0   1   -0.06    0.11
   4   0  -1   -0.06    0.12
   3   0  -1    0.08    0.09
   3   0  -1    0.07    0.09
  -3   0   1   -0.11    0.09
   3   0  -1   -0.03    0.10
  -3   0   1   -0.07    0.10
   2   0  -1   -0.06    0.06
   2   0  -1   -0.08    0.07
  -2   0   1   -0.09    0.08
  -2   0   1   -0.02    0.07
  -1   0   1   -0.01    0.04
  -1   0   1    0.01    0.05
   1   0  -1   -0.03    0.03
   1   0  -1   -0.02    0.05
   1   0   1   -0.15    0.04
  -1   0  -1   -0.22    0.06
  -1   0  -1   -0.19    0.04
  -1   0  -1   -0.24    0.04
   1   0   1   -0.19    0.04
  -2   0  -1    0.05    0.07
  -2   0  -1   -0.04    0.07
   2   0   1   -0.05    0.09
   2   0   1    0.04    0.06
   2   0   1    0.07    0.07
  -2   0  -1   -0.10    0.09
   3   0   1   -0.07    0.07
  -3   0  -1    0.02    0.09
   3   0   1    0.01    0.08
  -3   0  -1   -0.11    0.08
   3   0   1   -0.09    0.10
  -3   0  -1   -0.05    0.11
  -4   0  -1   -0.11    0.10
   4   0   1    0.29    0.14
   4   0   1   -0.04    0.10
  -4   0  -1   -0.03    0.10
   4   0   1    0.12    0.10
  -4   0  -1    0.08    0.13
   5   0   1   -0.03    0.12
  -5   0  -1   -0.06    0.14
   5   0   1   -0.32    0.16
   5   0   1   -0.05    0.12
  -5   0  -1   -0.11    0.14
   6   0   1    0.15    0.23
  -6   0  -1   -0.02    0.17
  -6   0  -1   -0.15    0.16
   6   0   1    0.28    0.16
   6   0   1   -0.21    0.15
   7   0   1   -0.09    0.18
  -7   0  -1   -0.05    0.23
  -7   0  -1   -0.16    0.20
   7   0   1   -0.24    0.26
   7   0   1    0.81    0.39
   8   0   1    0.18    0.23
  -8   0  -1   -0.46    0.28
   8   0   1   -0.01    0.21
  -8   0  -1   -0.40    0.24
  -9   0  -1   -0.55    0.29
   9   0   1   -0.22    0.24
   9   0   1   -0.26    0.28
  -9   0  -1   -0.23    0.36
  10   0   1   -0.80    0.36
 -10   0  -1    0.66    0.39
  10   0   1    0.00    0.31
 -11   0  -1    1.24    0.50
  11   0   1   -0.15    0.38
  12  -1  -1    1.21    0.48
 -12  -1   1    0.37    0.84
  12   1  -1    1.43    0.56
 -12   1   1    1.22    0.66
  11  -1  -1   -0.27    0.53
  11  -1  -1    1.11    0.38
 -11  -1   1    1.35    0.50
 -11   1   1   -0.09    0.43
  11   1  -1   -0.27    0.41
  10  -1  -1    0.39    0.38
  10  -1  -1    0.63    0.40
 -10  -1   1   -0.48    0.37
  10   1  -1   -0.04    0.42
 -10   1   1    0.41    0.38
  10   1  -1    0.30    0.35
  -9  -1   1    4.87    0.59
   9  -1  -1    5.04    0.74
   9  -1  -1    3.86    0.56
   9  -1  -1    4.93    0.50
  -9  -1   1    4.96    0.56
   9   1  -1    4.57    0.52
  -9   1   1    3.96    0.57
   9   1  -1    4.40    0.57
  -9   1   1    4.29    0.64
  -8  -1   1    5.14    0.53
  -8  -1   1    6.15    0.57
   8  -1  -1    6.07    0.63
   8  -1  -1    7.06    0.47
   8  -1  -1    5.97    0.76
  -8   1   1    5.82    0.53
   8   1  -1    5.07    0.58
   8   1  -1    5.94    0.52
  -8   1   1    5.24    0.56
   8   1  -1    6.97    0.52
  -7  -1   1    0.92    0.25
  -7  -1   1    1.02    0.27
   7  -1  -1    1.56    0.24
   7  -1  -1    1.39    0.25
   7  -1  -1    1.37    0.32
  -7   1   1    1.45    0.29
   7   1  -1    1.04    0.25
   7   1  -1    1.93    0.34
  -7   1   1    0.67    0.26
   7   1  -1    1.26    0.26
  -6  -1   1    1.09    0.23
   6  -1  -1    1.01    0.24
   6  -1  -1    0.67    0.19
  -6  -1   1    0.96    0.22
   6  -1  -1    0.75    0.20
   6   1  -1    0.86    0.20
  -6   1   1    1.02    0.21
   6   1  -1    0.90    0.24
  -6   1   1    0.71    0.22
   5  -1  -1    6.52    0.43
  -5  -1   1    7.23    0.39
   5  -1  -1    7.46    0.37
   5  -1  -1    6.68    0.38
  -5  -1   1    6.69    0.40
   5   1  -1    7.07    0.39
   5   1  -1    7.16    0.38
  -5   1   1    6.34    0.38
   5   1  -1    7.27    0.41
  -5   1   1    6.78    0.40
   4  -1  -1    1.40    0.16
   4  -1  -1    1.38    0.21
  -4  -1   1    0.91    0.15
   4  -1  -1    1.48    0.20
  -4  -1   1    0.94    0.16
  -4   1   1    1.41    0.18
   4   1  -1    1.30    0.19
   4   1  -1    1.54    0.22
  -4   1   1    1.42    0.21
   4   1  -1    1.54    0.21
   3  -1  -1   23.05    0.72
  -3  -1   1   23.00    0.73
  -3  -1   1   22.62    0.74
   3  -1  -1   22.76    0.71
   3   1  -1   21.96    0.73
   3   1  -1   23.28    0.73
  -3   1   1   23.50    0.73
   3   1  -1   23.42    0.73
  -3   1   1   22.73    0.72
  -2  -1   1   17.40    0.55
  -2  -1   1   17.67    0.56
   2  -1  -1   17.76    0.54
   2  -1  -1   16.58    0.54
   2   1  -1   17.40    0.55
   2   1  -1   17.58    0.55
   2   1  -1   17.06    0.54
  -2   1   1   17.77    0.54
  -2   1   1   17.43    0.55
  -1  -1   1    3.36    0.14
  -1  -1   1    3.41    0.13
   1  -1  -1    2.90    0.14
   1  -1  -1    3.26    0.14
  -1  -1   1    2.83    0.15
  -1   1   1    2.80    0.15
  -1   1   1    3.28    0.14
   1   1  -1    3.40    0.13
   1   1  -1    3.10    0.16
   1   1  -1    3.20    0.15
   1  -1   1    0.36    0.04
  -1  -1  -1    0.49    0.07
   1  -1   1    0.32    0.06
   1  -1   1    0.35    0.04
   1   1   1    0.41    0.06
  -1   1  -1    0.36    0.05
  -1   1  -1    0.33    0.05
   2  -1   1   60.75    1.71
  -2  -1  -1   63.59    1.69
   2  -1   1   58.56    1.65
  -2  -1  -1   60.40    1.68
  -2  -1  -1   62.30    1.70
   2   1   1   61.85    1.68
   2   1   1   62.73    1.68
  -2   1  -1   57.41    1.67
  -2   1  -1   61.56    1.66
   3  -1   1   27.73    0.88
  -3  -1  -1   27.32    0.84
   3  -1   1   28.42    0.82
   3  -1   1   27.73    0.81
  -3  -1  -1   26.44    0.85
  -3  -1  -1   28.13    0.88
   3   1   1   28.36    0.84
  -3   1  -1   27.87    0.83
  -3   1  -1   28.30    0.84
   3   1   1   27.24    0.84
   4  -1   1    1.17    0.17
   4  -1   1    1.05    0.19
  -4  -1  -1    1.07    0.16
  -4  -1  -1    1.33    0.21
   4  -1   1    1.20    0.17
  -4  -1  -1    1.14    0.16
  -4   1  -1    1.12    0.16
   4   1   1    1.28    0.19
   4   1   1    1.23    0.16
  -4   1  -1    1.17    0.16
  -5  -1  -1    1.05    0.20
   5  -1   1    1.33    0.17
   5  -1   1    1.11    0.22
  -5  -1  -1    1.50    0.20
  -5  -1  -1    1.61    0.22
   5  -1   1    1.18    0.17
   5   1   1    1.31    0.19
  -5   1  -1    0.90    0.18
  -5   1  -1    1.18    0.20
   5   1   1    1.14    0.18
  -6  -1  -1    1.11    0.22
   6  -1   1    1.08    0.20
  -6  -1  -1    0.63    0.21
   6  -1   1    1.23    0.19
   6  -1   1    0.99    0.25
  -6   1  -1    0.74    0.20
  -6   1  -1    1.16    0.26
   6   1   1    0.88    0.20
   6   1   1    0.83    0.20
  -7  -1  -1   20.01    0.87
  -7  -1  -1   22.46    0.86
   7  -1   1   20.43    0.78
   7  -1   1   20.36    0.92
   7  -1   1   21.36    0.77
   7   1   1   20.70    0.81
   7   1   1   19.88    0.81
  -7   1  -1   21.14    0.85
  -7   1  -1   19.96    1.07
   8  -1   1    0.08    0.22
  -8  -1  -1   -0.11    0.24
   8  -1   1    0.33    0.22
   8  -1   1    0.06    0.35
  -8  -1  -1    0.26    0.29
   8   1   1    0.05    0.23
  -8   1  -1   -0.22    0.28
   8   1   1    0.11    0.45
  -8   1  -1    0.42    0.27
  -9  -1  -1   -0.17    0.37
   9  -1   1   -0.07    0.23
  -9  -1  -1   -0.13    0.30
   9   1   1   -0.25    0.30
   9   1   1   -0.24    0.27
  -9   1  -1    0.01    0.38
  -9   1  -1   -0.27    0.30
  10  -1   1    0.67    0.37
 -10  -1  -1    0.86    0.42
 -10   1  -1    1.19    0.40
  10   1   1    1.78    0.41
 -11  -1  -1   -0.10    0.49
  11  -1   1   -0.47    0.35
  11   1   1   -0.27    0.54
  11   1   1    0.91    0.43
 -11   1  -1    1.28    0.51
 -11  -2   1   -0.57    0.47
  11  -2  -1    0.79    0.52
  11  -2  -1    0.43    0.37
 -11   2   1    0.47    0.47
  11   2  -1    0.25    0.47
 -10  -2   1    1.18    0.42
  10  -2  -1    0.74    0.31
  10  -2  -1    0.74    0.41
  10   2  -1    0.45    0.36
  10   2  -1    0.40    0.46
 -10   2   1    0.26    0.38
   9  -2  -1   -0.39    0.29
  -9  -2   1   -0.13    0.44
   9  -2  -1    0.06    0.25
  -9  -2   1   -0.38    0.29
   9   2  -1    0.64    0.36
  -9   2   1    1.23    0.41
   9   2  -1   -0.53    0.48
  -9   2   1   -0.03    0.30
   8  -2  -1    2.28    0.41
   8  -2  -1    2.92    0.35
   8  -2  -1    2.65    0.37
  -8  -2   1    3.31    0.42
  -8  -2   1    2.66    0.40
  -8   2   1    2.89    0.40
  -8   2   1    2.40    0.38
   8   2  -1    2.83    0.36
   8   2  -1    3.20    0.39
   7  -2  -1    1.51    0.27
  -7  -2   1    1.81    0.30
   7  -2  -1    2.13    0.38
   7  -2  -1    2.27    0.27
  -7  -2   1    1.64    0.31
   7   2  -1    1.99    0.30
  -7   2   1    1.92    0.31
  -7   2   1    1.74    0.30
   6  -2  -1    0.17    0.25
  -6  -2   1    0.19    0.20
   6  -2  -1    0.27    0.18
   6  -2  -1    0.12    0.15
  -6  -2   1   -0.16    0.18
  -6   2   1   -0.16    0.17
   6   2  -1    0.08    0.17
   6   2  -1   -0.10    0.18
  -6   2   1    0.17    0.19
  -5  -2   1   10.68    0.50
   5  -2  -1    9.93    0.45
  -5  -2   1    9.51    0.47
   5  -2  -1    9.56    0.52
   5  -2  -1    9.55    0.43
  -5   2   1   10.69    0.48
  -5   2   1    9.58    0.47
   5   2  -1    9.86    0.48
   5   2  -1   10.40    0.48
   5   2  -1   10.27    0.48
  -4  -2   1    5.75    0.32
  -4  -2   1    5.87    0.33
   4  -2  -1    5.36    0.29
   4  -2  -1    5.17    0.31
  -4  -2   1    5.67    0.35
  -4   2   1    5.64    0.31
  -4   2   1    5.94    0.33
   4   2  -1    5.98    0.32
   4   2  -1    5.45    0.33
   4   2  -1    5.23    0.32
  -3  -2   1    2.95    0.21
   3  -2  -1    2.89    0.19
   3  -2  -1    2.72    0.21
  -3  -2   1    2.90    0.20
  -3  -2   1    2.37    0.23
  -3   2   1    2.95    0.22
  -3   2   1    2.77    0.21
   3   2  -1    2.92    0.22
   3   2  -1    2.57    0.22
  -2  -2   1    7.12    0.28
  -2  -2   1    6.46    0.30
  -2  -2   1    7.25    0.28
   2  -2  -1    7.11    0.27
   2  -2  -1    7.22    0.29
   2   2  -1    6.81    0.30
  -2   2   1    7.16    0.28
  -2   2   1    6.64    0.29
   1  -2  -1    4.27    0.18
   1  -2  -1    4.17    0.19
  -1  -2   1    4.62    0.17
  -1  -2   1    4.29    0.20
  -1   2   1    4.10    0.18
   1   2  -1    4.79    0.18
   1   2  -1    4.40    0.20
  -1   2   1    4.33    0.19
   0  -2   1   35.21    0.94
   0  -2  -1   31.99    0.94
   0  -2  -1   34.56    0.96
   0  -2   1   34.17    0.93
   0   2  -1   36.93    0.95
   0   2   1   33.89    0.94
   0   2   1   34.65    0.95
   1  -2   1   20.20    0.56
  -1  -2  -1   20.18    0.58
   1  -2   1   19.80    0.56
   1   2   1   19.13    0.59
  -1   2  -1   20.67    0.56
  -1   2  -1   20.21    0.57
   1   2   1   20.40    0.59
  -2  -2  -1    7.32    0.31
   2  -2   1    7.38    0.26
  -2  -2  -1    7.45    0.29
   2   2   1    7.51    0.30
   2   2   1    7.28    0.30
  -2   2  -1    7.34    0.26
  -2   2  -1    7.62    0.28
  -3  -2  -1    0.17    0.11
   3  -2   1    0.15    0.12
  -3  -2  -1    0.07    0.09
   3  -2   1    0.06    0.08
  -3  -2  -1    0.16    0.11
   3  -2   1    0.17    0.07
  -3   2  -1    0.16    0.10
   3   2   1    0.15    0.09
   3   2   1    0.24    0.10
  -3   2  -1    0.13    0.09
   4  -2   1    0.33    0.15
  -4  -2  -1    0.32    0.15
  -4  -2  -1    0.33    0.13
   4  -2   1    0.40    0.11
   4  -2   1    0.39    0.10
  -4  -2  -1    0.35    0.13
  -4   2  -1    0.39    0.13
   4   2   1    0.20    0.11
  -4   2  -1    0.51    0.13
   4   2   1    0.44    0.14
   5  -2   1   10.86    0.42
  -5  -2  -1   10.74    0.51
   5  -2   1    8.99    0.77
  -5  -2  -1   11.17    0.50
  -5  -2  -1   10.84    0.53
   5  -2   1   10.87    0.44
   5   2   1   10.90    0.49
  -5   2  -1   11.42    0.49
  -5   2  -1   11.11    0.49
   5   2   1   10.32    0.48
  -6  -2  -1    4.99    0.40
  -6  -2  -1    5.10    0.45
   6  -2   1    4.94    0.34
   6  -2   1    4.89    0.46
  -6  -2  -1    4.82    0.41
   6  -2   1    5.47    0.31
   6   2   1    5.08    0.38
  -6   2  -1    4.92    0.40
  -6   2  -1    4.43    0.47
   7  -2   1    0.25    0.16
  -7  -2  -1    0.23    0.24
   7  -2   1   -0.01    0.18
   7  -2   1   -0.12    0.26
  -7  -2  -1    0.19    0.25
  -7   2  -1    0.11    0.39
  -7   2  -1    0.17    0.23
   7   2   1   -0.07    0.19
   7   2   1    0.45    0.23
   8  -2   1    0.41    0.34
   8  -2   1    0.36    0.20
  -8  -2  -1    0.36    0.30
  -8  -2  -1    0.08    0.27
   8  -2   1    0.07    0.36
  -8   2  -1    0.42    0.27
   8   2   1    0.46    0.26
  -8   2  -1   -0.04    0.30
   8   2   1    0.20    0.26
   9  -2   1    0.99    0.25
  -9  -2  -1    0.26    0.34
  -9  -2  -1    0.19    0.50
   9  -2   1    0.12    0.28
  -9   2  -1    0.36    0.42
   9   2   1    0.55    0.34
   9   2   1    0.36    0.31
  -9   2  -1    0.46    0.32
  10  -2   1    0.74    0.27
 -10  -2  -1    0.88    0.43
  10  -2   1   -0.32    0.35
  10   2   1    0.31    0.37
 -10   2  -1    0.80    0.40
  10   2   1   -0.34    0.40
  11  -2   1    3.31    0.42
 -11  -2  -1    3.66    0.63
  11   2   1    4.27    0.55
 -11   2  -1    3.18    0.55
 -11  -3   1    2.19    0.54
  11   3  -1    0.05    0.46
 -11   3   1    0.53    0.51
  10  -3  -1    0.77    0.30
 -10  -3   1    1.11    0.44
  10  -3  -1    0.53    0.40
  10   3  -1    0.83    0.41
 -10   3   1    1.19    0.42
   9  -3  -1    0.88    0.26
  -9  -3   1    0.92    0.38
   9  -3  -1    1.01    0.33
  -9   3   1    0.79    0.43
   9   3  -1    1.12    0.34
   9   3  -1    1.32    0.41
  -9   3   1    1.63    0.36
   8  -3  -1    0.53    0.25
  -8  -3   1    0.56    0.49
  -8  -3   1    0.42    0.31
   8  -3  -1   -0.31    0.33
   8  -3  -1    0.31    0.20
  -8   3   1   -0.01    0.31
   8   3  -1   -0.09    0.24
   8   3  -1   -0.31    0.29
  -8   3   1    0.13    0.27
  -7  -3   1    5.44    0.49
   7  -3  -1    4.94    0.56
   7  -3  -1    5.13    0.71
  -7  -3   1    5.61    0.48
   7  -3  -1    5.54    0.37
  -7   3   1    5.15    0.49
   7   3  -1    5.42    0.47
  -7   3   1    5.19    0.49
   7   3  -1    5.08    0.47
  -6  -3   1   11.57    0.61
   6  -3  -1   11.50    0.49
   6  -3  -1   11.49    0.54
  -6  -3   1   12.23    0.60
   6  -3  -1   12.74    0.76
   6   3  -1   11.82    0.59
  -6   3   1   10.24    0.56
   6   3  -1   11.79    0.58
  -6   3   1   12.11    0.58
  -5  -3   1    3.23    0.33
  -5  -3   1    3.11    0.37
   5  -3  -1    2.98    0.25
   5  -3  -1    3.18    0.29
  -5  -3   1    3.30    0.34
   5   3  -1    3.19    0.31
  -5   3   1    3.38    0.30
  -5   3   1    3.12    0.31
   5   3  -1    2.56    0.37
  -4  -3   1    1.05    0.17
   4  -3  -1    0.74    0.16
  -4  -3   1    0.53    0.15
  -4  -3   1    0.68    0.16
   4  -3  -1    0.82    0.13
  -4   3   1    0.86    0.15
  -4   3   1    0.55    0.15
   4   3  -1    0.62    0.15
   4   3  -1    1.14    0.18
  -3  -3   1    2.95    0.21
   3  -3  -1    2.77    0.18
  -3  -3   1    2.96    0.24
  -3  -3   1    2.89    0.21
   3  -3  -1    2.76    0.22
  -3   3   1    2.81    0.21
  -3   3   1    2.43    0.22
   3   3  -1    2.49    0.22
  -2  -3   1   15.78    0.50
   2  -3  -1   15.20    0.49
   2  -3  -1   15.19    0.51
  -2  -3   1   14.78    0.53
   2   3  -1   15.18    0.53
  -2   3   1   16.77    0.51
  -2   3   1   15.80    0.50
   1  -3  -1    6.22    0.25
   1  -3  -1    6.38    0.26
  -1  -3   1    6.60    0.27
  -1  -3   1    6.47    0.24
  -1   3   1    6.18    0.25
   1   3  -1    6.47    0.24
  -1   3   1    6.17    0.25
   0  -3  -1   16.31    0.47
   0  -3  -1   14.95    0.48
   0  -3   1   14.98    0.45
   0  -3   1   14.84    0.47
   0   3  -1   14.81    0.47
   0   3   1   15.01    0.48
   0   3   1   14.83    0.47
   0   3  -1   16.13    0.46
   1  -3   1   19.15    0.56
  -1  -3  -1   19.77    0.61
  -1  -3  -1   19.60    0.58
   1  -3   1   18.17    0.60
   1   3   1   20.10    0.61
   1   3   1   19.22    0.58
  -1   3  -1   19.76    0.57
  -1   3  -1   19.64    0.57
   2  -3   1    6.75    0.23
   2  -3   1    6.14    0.24
  -2  -3  -1    6.10    0.26
  -2  -3  -1    6.40    0.30
   2   3   1    6.14    0.28
  -2   3  -1    6.29    0.24
   2   3   1    6.31    0.29
  -2   3  -1    5.99    0.26
   3  -3   1    1.14    0.14
  -3  -3  -1    1.58    0.19
   3  -3   1    1.53    0.13
  -3  -3  -1    1.54    0.18
  -3   3  -1    1.40    0.17
   3   3   1    1.71    0.19
   3   3   1    1.54    0.19
  -3   3  -1    1.32    0.15
  -4  -3  -1    4.14    0.32
  -4  -3  -1    4.20    0.28
   4  -3   1    4.37    0.22
   4  -3   1    4.28    0.24
   4  -3   1    4.22    0.34
  -4  -3  -1    3.99    0.31
   4   3   1    4.28    0.29
   4   3   1    4.44    0.30
  -4   3  -1    4.16    0.28
  -4   3  -1    4.33    0.27
  -5  -3  -1    0.14    0.15
   5  -3   1    0.08    0.20
   5  -3   1   -0.02    0.09
  -5  -3  -1   -0.11    0.16
   5  -3   1    0.00    0.11
  -5  -3  -1    0.03    0.15
   5   3   1   -0.09    0.14
   5   3   1    0.06    0.14
  -5   3  -1   -0.06    0.14
  -5   3  -1    0.00    0.14
  -6  -3  -1    0.12    0.19
   6  -3   1    0.25    0.48
  -6  -3  -1    0.09    0.22
  -6  -3  -1    0.34    0.21
   6  -3   1    0.15    0.12
   6  -3   1    0.14    0.15
  -6   3  -1    0.34    0.19
   6   3   1    0.46    0.20
  -6   3  -1    0.05    0.19
   6   3   1    0.16    0.18
  -7  -3  -1    1.86    0.34
   7  -3   1    1.88    0.39
   7  -3   1    2.07    0.27
  -7  -3  -1    2.03    0.29
   7  -3   1    1.95    0.24
  -7   3  -1    0.81    0.34
  -7   3  -1    1.48    0.28
   7   3   1    1.78    0.30
   7   3   1    1.55    0.29
   8  -3   1    2.07    0.30
  -8  -3  -1    1.60    0.43
   8  -3   1    2.12    0.29
   8  -3   1    3.00    0.45
  -8  -3  -1    2.57    0.38
   8   3   1    2.22    0.35
  -8   3  -1    2.36    0.37
  -8   3  -1    2.54    0.40
   8   3   1    2.26    0.35
  -9  -3  -1    0.53    0.35
   9  -3   1    0.25    0.27
   9  -3   1    0.13    0.21
  -9   3  -1   -0.02    0.32
  -9   3  -1    0.50    0.42
   9   3   1    0.99    0.34
 -10  -3  -1    0.24    0.42
  10  -3   1    0.51    0.27
  10  -3   1   -0.48    0.31
 -10   3  -1    0.17    0.39
  10   3   1    0.81    0.39
  10   3   1    0.38    0.46
 -11  -3  -1    1.44    0.56
  11  -3   1    0.17    0.38
 -11   3  -1   -0.06    0.48
  11   3   1    0.62    0.47
  11  -4  -1    0.76    0.36
 -11  -4   1    1.02    0.56
 -11   4   1    1.56    0.50
  11   4  -1    1.15    0.50
  10  -4  -1   -0.30    0.39
  10  -4  -1   -0.20    0.27
 -10  -4   1    0.09    0.40
  10   4  -1    0.25    0.39
 -10   4   1    1.07    0.39
   9  -4  -1    2.84    0.41
  -9  -4   1    2.75    0.45
   9  -4  -1    4.02    0.50
   9   4  -1    3.41    0.47
   9   4  -1    2.61    0.50
  -9   4   1    2.82    0.52
  -9   4   1    4.03    0.57
  -8  -4   1   -0.13    0.28
   8  -4  -1   -0.30    0.18
   8  -4  -1    0.03    0.38
  -8  -4   1    0.11    0.30
  -8   4   1    0.44    0.33
   8   4  -1    0.27    0.31
   8   4  -1    0.28    0.32
  -8   4   1    0.13    0.26
  -7  -4   1    6.77    0.56
   7  -4  -1    7.35    0.40
  -7  -4   1    6.80    0.51
   7  -4  -1    5.75    0.61
  -7   4   1    7.45    0.54
  -7   4   1    6.58    0.52
   7   4  -1    6.98    0.55
   7   4  -1    7.08    0.52
  -6  -4   1   12.49    0.63
   6  -4  -1   12.03    0.50
  -6  -4   1   12.01    0.58
   6  -4  -1   11.77    0.55
   6  -4  -1   11.51    0.69
   6   4  -1   11.21    0.60
  -6   4   1   12.68    0.61
  -6   4   1   12.88    0.60
   6   4  -1   13.04    0.89
  -5  -4   1    1.46    0.25
  -5  -4   1    1.25    0.21
   5  -4  -1    1.13    0.20
   5  -4  -1    1.29    0.17
  -5  -4   1    1.11    0.19
  -5   4   1    1.08    0.21
  -5   4   1    1.17    0.21
   5   4  -1    1.41    0.23
   5   4  -1    1.35    0.23
  -4  -4   1    1.32    0.18
   4  -4  -1    1.77    0.24
  -4  -4   1    1.37    0.21
   4  -4  -1    1.42    0.18
  -4  -4   1    1.48    0.20
  -4   4   1    1.47    0.21
  -4   4   1    1.30    0.18
   4   4  -1    1.69    0.23
   4   4  -1    1.57    0.20
   3  -4  -1    0.67    0.11
  -3  -4   1    0.91    0.13
  -3  -4   1    0.63    0.14
   3  -4  -1    0.78    0.14
  -3  -4   1    0.85    0.13
   3   4  -1    0.48    0.13
   3   4  -1    0.68    0.13
  -3   4   1    0.62    0.13
  -3   4   1    0.65    0.14
  -2  -4   1    3.01    0.23
  -2  -4   1    3.12    0.18
   2  -4  -1    3.20    0.19
   2  -4  -1    2.77    0.20
  -2   4   1    3.05    0.20
   2   4  -1    2.99    0.23
   2   4  -1    3.20    0.21
  -2   4   1    2.99    0.20
   1  -4  -1   11.63    0.41
   1  -4  -1   11.60    0.40
  -1  -4   1   12.13    0.39
  -1  -4   1   12.34    0.44
  -1   4   1   11.45    0.41
  -1   4   1   13.19    0.41
   1   4  -1   11.87    0.43
   1   4  -1   11.87    0.40
   0  -4   1    6.70    0.24
   0  -4  -1    6.11    0.27
   0  -4  -1    6.09    0.27
   0  -4   1    6.56    0.27
   0   4   1    6.23    0.27
   0   4  -1    6.55    0.27
   0   4   1    6.24    0.25
   0   4  -1    6.76    0.25
   1  -4   1    1.46    0.13
  -1  -4  -1    1.49    0.14
   1  -4   1    1.20    0.13
  -1  -4  -1    1.37    0.16
  -1   4  -1    1.21    0.12
  -1   4  -1    1.37    0.13
   1   4   1    1.41    0.14
   1   4   1    1.37    0.16
  -2  -4  -1   13.48    0.50
   2  -4   1   13.11    0.43
   2  -4   1   13.45    0.42
  -2  -4  -1   13.72    0.45
   2   4   1   11.66    0.46
  -2   4  -1   13.52    0.44
   2   4   1   13.10    0.48
  -2   4  -1   13.52    0.44
  -3  -4  -1    3.05    0.22
  -3  -4  -1    3.02    0.27
   3  -4   1    2.94    0.20
   3  -4   1    3.34    0.17
   3   4   1    3.02    0.24
   3   4   1    3.38    0.26
  -3   4  -1    3.15    0.21
  -3   4  -1    3.19    0.23
   4  -4   1    1.00    0.14
  -4  -4  -1    1.06    0.19
  -4  -4  -1    1.06    0.16
  -4  -4  -1    0.98    0.19
   4  -4   1    1.05    0.12
  -4   4  -1    1.13    0.16
   4   4   1    0.82    0.16
  -4   4  -1    1.05    0.17
   4   4   1    1.13    0.18
   5  -4   1    1.28    0.15
  -5  -4  -1    0.86    0.19
  -5  -4  -1    1.42    0.24
  -5  -4  -1    1.43    0.21
   5  -4   1    1.88    0.29
   5  -4   1    1.24    0.17
   5   4   1    1.47    0.23
  -5   4  -1    1.62    0.22
   5   4   1    1.06    0.21
  -5   4  -1    1.40    0.22
   6  -4   1    3.76    0.48
   6  -4   1    4.24    0.27
  -6  -4  -1    4.12    0.42
  -6  -4  -1    3.74    0.38
   6  -4   1    4.09    0.32
  -6  -4  -1    4.60    0.45
   6   4   1    3.73    0.39
   6   4   1    4.00    0.40
  -6   4  -1    4.52    0.39
  -6   4  -1    4.38    0.39
   7  -4   1    0.78    0.20
   7  -4   1    0.72    0.35
   7  -4   1    0.68    0.17
  -7  -4  -1    1.03    0.31
  -7  -4  -1    0.79    0.30
  -7  -4  -1    0.33    0.26
   7   4   1    1.34    0.29
  -7   4  -1    1.16    0.29
  -7   4  -1    1.13    0.28
   7   4   1    0.78    0.25
   8  -4   1    3.75    0.33
  -8  -4  -1    3.86    0.56
   8  -4   1    5.80    0.68
   8  -4   1    4.39    0.41
  -8  -4  -1    4.09    0.55
   8   4   1    4.05    0.45
   8   4   1    3.84    0.45
  -8   4  -1    3.87    0.50
  -8   4  -1    3.73    0.45
   9  -4   1    1.13    0.39
   9  -4   1    1.23    0.23
  -9  -4  -1    0.49    0.36
   9   4   1    0.34    0.33
  -9   4  -1    1.15    0.42
  -9   4  -1    1.25    0.36
   9   4   1    0.73    0.40
 -10  -4  -1   -0.08    0.42
  10  -4   1    0.48    0.40
  10  -4   1    0.61    0.25
 -10   4  -1    1.12    0.41
  10   4   1    0.16    0.39
 -11  -4  -1    0.65    0.57
  11   4   1    0.79    0.52
 -11   4  -1    0.99    0.51
  11  -5  -1    0.49    0.36
 -11  -5   1    0.53    0.58
  11   5  -1    0.99    0.53
 -11   5   1    0.01    0.48
  10  -5  -1    2.21    0.33
 -10  -5   1    2.49    0.54
  10  -5  -1    1.90    0.44
  10   5  -1    1.28    0.45
 -10   5   1    2.57    0.48
   9  -5  -1    0.99    0.26
   9  -5  -1    0.43    0.55
  -9  -5   1    0.63    0.35
   9   5  -1    0.73    0.36
  -9   5   1    0.46    0.34
   8  -5  -1    0.29    0.20
   8  -5  -1   -0.05    0.27
  -8  -5   1    0.05    0.30
   8  -5  -1   -0.61    0.39
  -8  -5   1    0.21    0.31
   8   5  -1   -0.24    0.32
  -8   5   1    0.45    0.35
  -8   5   1   -0.45    0.28
   8   5  -1   -0.10    0.27
  -7  -5   1    1.11    0.31
  -7  -5   1    0.71    0.29
   7  -5  -1    1.15    0.36
   7  -5  -1    1.14    0.20
   7   5  -1    0.67    0.27
  -7   5   1    1.06    0.31
  -7   5   1    1.10    0.27
   7   5  -1    1.51    0.33
  -6  -5   1    1.34    0.30
   6  -5  -1    1.26    0.23
  -6  -5   1    1.08    0.26
  -6  -5   1    1.21    0.24
   6  -5  -1    1.28    0.19
  -6   5   1    1.60    0.28
   6   5  -1    1.32    0.28
   6   5  -1    1.11    0.25
  -6   5   1    1.14    0.25
   5  -5  -1    3.28    0.26
  -5  -5   1    3.47    0.34
   5  -5  -1    3.55    0.33
  -5  -5   1    3.61    0.38
  -5  -5   1    3.82    0.33
   5   5  -1    3.54    0.38
  -5   5   1    3.36    0.35
  -5   5   1    3.38    0.33
   5   5  -1    3.64    0.34
   4  -5  -1    0.14    0.11
   4  -5  -1    0.23    0.14
  -4  -5   1    0.28    0.22
  -4  -5   1    0.15    0.13
  -4  -5   1    0.10    0.16
   4   5  -1    0.45    0.20
  -4   5   1   -0.01    0.14
   4   5  -1    0.24    0.15
  -4   5   1    0.19    0.15
  -3  -5   1    8.31    0.42
   3  -5  -1    7.94    0.34
  -3  -5   1    8.22    0.35
   3  -5  -1    7.79    0.37
   3   5  -1    8.66    0.39
  -3   5   1    8.45    0.37
  -3   5   1    8.11    0.37
   3   5  -1    8.48    0.42
  -2  -5   1    0.94    0.16
   2  -5  -1    1.30    0.16
  -2  -5   1    1.14    0.15
   2  -5  -1    1.02    0.15
   2   5  -1    1.21    0.17
  -2   5   1    1.18    0.14
  -2   5   1    1.03    0.13
   2   5  -1    1.23    0.17
   1  -5  -1    5.02    0.25
  -1  -5   1    4.99    0.23
   1  -5  -1    4.71    0.24
  -1  -5   1    4.95    0.27
  -1   5   1    4.63    0.25
   1   5  -1    5.09    0.27
  -1   5   1    4.87    0.24
   1   5  -1    4.86    0.23
   0  -5  -1    1.72    0.16
   0  -5   1    1.66    0.17
   0  -5  -1    1.72    0.18
   0  -5   1    1.66    0.14
   0   5   1    1.46    0.15
   0   5  -1    1.75    0.14
   0   5   1    1.80    0.17
   0   5  -1    1.59    0.17
   1  -5   1    1.11    0.14
  -1  -5  -1    0.84    0.13
  -1  -5  -1    1.38    0.17
   1  -5   1    0.99    0.14
  -1   5  -1    1.38    0.14
  -1   5  -1    1.34    0.14
   1   5   1    1.09    0.14
  -2  -5  -1    3.64    0.27
   2  -5   1    3.54    0.21
  -2  -5  -1    3.88    0.22
   2  -5   1    3.93    0.20
   2   5   1    3.80    0.24
   2   5   1    3.98    0.27
  -2   5  -1    3.96    0.22
  -2   5  -1    3.99    0.21
   3  -5   1   18.81    0.60
   3  -5   1   18.21    0.58
  -3  -5  -1   18.18    0.69
  -3  -5  -1   18.49    0.62
   3   5   1   17.76    0.65
  -3   5  -1   18.53    0.62
   3   5   1   18.85    0.67
  -3   5  -1   18.58    0.61
  -4  -5  -1    1.08    0.20
  -4  -5  -1    1.20    0.17
  -4  -5  -1    1.31    0.20
   4  -5   1    1.23    0.16
   4  -5   1    1.12    0.16
   4   5   1    1.45    0.23
   4   5   1    1.40    0.21
  -4   5  -1    1.23    0.17
  -4   5  -1    0.93    0.18
   5  -5   1   10.36    0.43
  -5  -5  -1   10.46    0.51
  -5  -5  -1   10.59    0.54
   5  -5   1   10.90    0.40
  -5  -5  -1   10.02    0.55
   5  -5   1   10.98    0.60
   5   5   1   10.71    0.54
   5   5   1   10.44    0.53
  -5   5  -1    9.85    0.50
  -5   5  -1   10.09    0.49
  -6  -5  -1    2.28    0.32
  -6  -5  -1    2.11    0.31
   6  -5   1    2.01    0.22
  -6  -5  -1    1.96    0.26
   6  -5   1    2.39    0.27
   6  -5   1    1.61    0.34
   6   5   1    2.35    0.32
  -6   5  -1    2.14    0.28
   6   5   1    1.93    0.30
  -6   5  -1    2.88    0.36
  -7  -5  -1    2.84    0.42
   7  -5   1    2.13    0.32
  -7  -5  -1    2.09    0.35
   7  -5   1    2.70    0.25
  -7  -5  -1    2.23    0.38
   7  -5   1    2.04    0.42
   7   5   1    2.46    0.37
   7   5   1    2.02    0.34
  -7   5  -1    1.24    0.32
  -7   5  -1    2.74    0.40
  -8  -5  -1    0.85    0.34
   8  -5   1    1.06    0.28
  -8  -5  -1    2.04    0.39
   8  -5   1    1.11    0.44
  -8   5  -1    0.81    0.38
   8   5   1    1.47    0.38
   8   5   1    1.37    0.36
  -8   5  -1    1.74    0.34
   9  -5   1    4.18    0.37
  -9  -5  -1    3.31    0.51
   9  -5   1    3.16    0.45
  -9   5  -1    4.43    0.58
  -9   5  -1    4.08    0.62
   9   5   1    4.48    0.60
   9   5   1    3.80    0.50
 -10  -5  -1    0.93    0.47
  10  -5   1    1.07    0.25
 -10   5  -1    1.64    0.43
  10   5   1    1.36    0.45
 -11  -5  -1    1.84    0.64
  11   5   1    0.99    0.55
 -11   5  -1    0.94    0.52
  11   6  -1    0.60    0.57
 -11   6   1    2.50    0.56
 -10  -6   1    0.87    0.49
  10  -6  -1    0.40    0.29
  10   6  -1    0.49    0.46
 -10   6   1    0.30    0.38
  -9  -6   1    0.19    0.40
   9  -6  -1    0.75    0.34
   9  -6  -1   -0.20    0.23
  -9   6   1   -0.37    0.31
   9   6  -1   -0.60    0.36
   8  -6  -1    1.38    0.31
  -8  -6   1    1.39    0.38
   8  -6  -1    1.44    0.24
  -8   6   1    1.15    0.35
  -8   6   1    1.38    0.41
   8   6  -1    1.12    0.35
   8   6  -1    1.15    0.40
  -7  -6   1    0.07    0.25
   7  -6  -1    0.24    0.38
  -7  -6   1    0.11    0.27
   7  -6  -1    0.56    0.18
  -7   6   1   -0.14    0.28
  -7   6   1    0.17    0.25
   7   6  -1    0.63    0.31
   6  -6  -1    0.11    0.20
  -6  -6   1    0.31    0.24
  -6  -6   1    0.33    0.21
   6  -6  -1    0.07    0.14
  -6  -6   1    0.28    0.22
   6   6  -1    0.51    0.26
   6   6  -1   -0.07    0.21
  -6   6   1   -0.04    0.20
  -6   6   1    0.01    0.23
   5  -6  -1    0.03    0.12
  -5  -6   1    0.00    0.22
  -5  -6   1    0.09    0.17
   5  -6  -1    0.30    0.18
  -5  -6   1    0.11    0.16
  -5   6   1   -0.14    0.17
   5   6  -1   -0.01    0.19
   5   6  -1    0.19    0.21
  -5   6   1    0.06    0.18
  -4  -6   1    5.30    0.39
   4  -6  -1    5.06    0.29
  -4  -6   1    4.27    0.31
  -4  -6   1    4.41    0.31
   4  -6  -1    4.47    0.34
  -4   6   1    4.70    0.43
   4   6  -1    4.94    0.39
  -4   6   1    5.07    0.35
   4   6  -1    5.18    0.37
   3  -6  -1    4.59    0.32
  -3  -6   1    6.57    0.39
   3  -6  -1    6.14    0.30
  -3  -6   1    5.79    0.30
  -3   6   1    5.77    0.32
  -3   6   1    6.30    0.33
   3   6  -1    5.52    0.34
   2  -6  -1    0.41    0.12
   2  -6  -1    0.30    0.13
  -2  -6   1    0.22    0.10
  -2  -6   1    0.16    0.13
  -2   6   1    0.23    0.11
   2   6  -1    0.18    0.14
  -2   6   1    0.25    0.12
   2   6  -1    0.45    0.12
   1  -6  -1   72.46    2.03
   1  -6  -1   73.86    2.06
  -1  -6   1   74.94    2.08
  -1   6   1   75.64    2.07
   1   6  -1   71.74    2.03
  -1   6   1   72.39    2.04
   1   6  -1   72.30    2.08
   0  -6  -1    1.55    0.17
   0  -6   1    1.68    0.16
   0  -6   1    1.35    0.18
   0  -6  -1    1.32    0.20
   0   6  -1    1.46    0.19
   0   6   1    1.56    0.19
   0   6  -1    1.68    0.16
   0   6   1    1.81    0.17
   1  -6   1    0.66    0.12
  -1  -6  -1    0.64    0.13
   1  -6   1    0.67    0.12
  -1   6  -1    0.66    0.12
   1   6   1    0.64    0.12
  -1   6  -1    0.52    0.12
   1   6   1    0.59    0.13
   2  -6   1    0.59    0.11
   2  -6   1    0.69    0.12
  -2  -6  -1    0.49    0.11
  -2  -6  -1    0.39    0.15
   2   6   1    0.83    0.16
   2   6   1    0.58    0.14
  -2   6  -1    0.55    0.12
  -2   6  -1    0.57    0.12
   3  -6   1    3.42    0.22
   3  -6   1    3.52    0.25
  -3  -6  -1    3.97    0.33
  -3  -6  -1    3.66    0.32
   3   6   1    3.68    0.29
  -3   6  -1    3.66    0.25
   3   6   1    3.95    0.32
  -3   6  -1    3.41    0.26
  -4  -6  -1    0.13    0.18
   4  -6   1    0.26    0.10
  -4  -6  -1    0.17    0.14
   4  -6   1    0.33    0.14
  -4   6  -1    0.34    0.14
  -4   6  -1    0.08    0.15
   4   6   1   -0.20    0.17
   4   6   1    0.25    0.16
  -5  -6  -1    0.01    0.17
  -5  -6  -1    0.01    0.19
   5  -6   1    0.06    0.11
  -5  -6  -1   -0.21    0.17
   5  -6   1   -0.14    0.25
   5  -6   1   -0.08    0.13
   5   6   1   -0.26    0.18
  -5   6  -1    0.05    0.17
   5   6   1    0.08    0.19
  -5   6  -1    0.04    0.17
   6  -6   1    1.38    0.36
  -6  -6  -1    1.06    0.30
   6  -6   1    1.25    0.16
  -6  -6  -1    1.21    0.29
  -6  -6  -1    1.14    0.25
   6  -6   1    1.38    0.21
   6   6   1    1.01    0.26
  -6   6  -1    1.19    0.26
   6   6   1    1.41    0.27
  -6   6  -1    1.34    0.26
   7  -6   1    2.00    0.24
   7  -6   1    2.08    0.47
  -7  -6  -1    2.02    0.36
   7  -6   1    1.52    0.19
  -7  -6  -1    1.64    0.30
  -7  -6  -1    1.29    0.33
  -7   6  -1    1.69    0.34
  -7   6  -1    1.44    0.29
   7   6   1    1.49    0.34
   7   6   1    1.57    0.39
   8  -6   1   -0.20    0.21
  -8  -6  -1    0.30    0.33
   8  -6   1    0.18    0.16
  -8   6  -1   -0.42    0.37
   8   6   1   -0.10    0.31
   8   6   1    0.51    0.35
  -8   6  -1   -0.11    0.31
  -9  -6  -1    0.59    0.40
   9  -6   1    0.50    0.25
   9  -6   1    0.46    0.20
   9   6   1    0.23    0.39
  -9   6  -1    1.21    0.36
 -10  -6  -1    0.72    0.56
 -10   6  -1    1.92    0.46
  10   6   1    0.76    0.47
 -11   6  -1    1.06    0.54
  10  -7  -1    3.60    0.50
 -10  -7   1    3.61    0.64
  10   7  -1    2.82    0.60
 -10   7   1    3.46    0.53
   9  -7  -1    5.12    0.62
   9  -7  -1    4.52    0.45
  -9  -7   1    4.46    0.62
  -9   7   1    5.24    0.60
   9   7  -1    5.75    0.71
  -8  -7   1    3.48    0.49
   8  -7  -1    2.68    0.30
   8  -7  -1    2.67    0.38
   8   7  -1    2.43    0.45
  -8   7   1    3.12    0.50
  -8   7   1    2.67    0.39
  -7  -7   1    0.66    0.31
   7  -7  -1    0.79    0.20
   7  -7  -1    0.52    0.40
  -7  -7   1    1.16    0.34
  -7  -7   1    0.36    0.28
   7   7  -1    0.31    0.35
   7   7  -1    0.60    0.28
  -7   7   1    1.09    0.28
  -7   7   1    0.96    0.36
  -6  -7   1    0.22    0.23
  -6  -7   1    0.07    0.20
  -6  -7   1    0.14    0.26
   6  -7  -1    0.47    0.23
   6  -7  -1    0.47    0.16
   6   7  -1   -0.06    0.22
  -6   7   1    0.15    0.21
  -6   7   1   -0.22    0.24
   6   7  -1    0.08    0.28
  -5  -7   1    6.19    0.50
   5  -7  -1    5.98    0.42
  -5  -7   1    5.35    0.39
  -5  -7   1    4.75    0.38
   5  -7  -1    5.69    0.33
   5   7  -1    5.53    0.45
  -5   7   1    4.92    0.41
   5   7  -1    5.82    0.49
  -5   7   1    5.54    0.67
  -4  -7   1    2.19    0.28
   4  -7  -1    2.15    0.24
   4  -7  -1    2.08    0.31
  -4  -7   1    2.09    0.27
  -4  -7   1    1.85    0.28
   4   7  -1    1.80    0.29
   4   7  -1    2.16    0.29
  -4   7   1    2.03    0.29
  -4   7   1    2.03    0.25
  -3  -7   1    5.32    0.32
   3  -7  -1    5.43    0.31
   3  -7  -1    6.11    0.35
  -3  -7   1    5.24    0.39
   3   7  -1    5.52    0.39
  -3   7   1    5.14    0.33
   3   7  -1    5.99    0.37
  -2  -7   1    0.99    0.15
   2  -7  -1    0.92    0.17
   2  -7  -1    0.88    0.16
  -2  -7   1    0.79    0.17
   2   7  -1    0.93    0.19
  -2   7   1    1.05    0.16
  -2   7   1    1.17    0.17
   2   7  -1    1.12    0.17
  -1  -7   1    3.66    0.24
   1  -7  -1    3.31    0.25
   1  -7  -1    3.61    0.26
  -1  -7   1    3.53    0.28
   1   7  -1    3.16    0.28
   1   7  -1    3.44    0.24
  -1   7   1    3.39    0.27
   0  -7   1    3.04    0.26
   0  -7  -1    3.33    0.27
   0  -7  -1    3.10    0.23
   0  -7   1    2.88    0.22
   0   7  -1    3.14    0.22
   0   7   1    3.10    0.25
   0   7   1    3.24    0.23
   0   7  -1    2.90    0.25
  -1  -7  -1    0.08    0.12
  -1  -7  -1    0.18    0.12
   1  -7   1    0.13    0.11
   1  -7   1   -0.14    0.10
  -1   7  -1    0.04    0.11
   1   7   1    0.05    0.10
   2  -7   1    0.13    0.12
  -2  -7  -1    0.15    0.15
  -2  -7  -1    0.24    0.16
   2  -7   1    0.26    0.11
   2   7   1    0.24    0.15
  -2   7  -1    0.14    0.12
   2   7   1    0.53    0.14
  -2   7  -1    0.11    0.12
   3  -7   1   30.09    0.92
  -3  -7  -1   30.04    0.96
   3  -7   1   30.15    0.94
  -3  -7  -1   30.38    1.05
  -3   7  -1   31.02    0.97
   3   7   1   29.38    1.00
   3   7   1   30.98    1.04
  -3   7  -1   30.61    0.95
  -4  -7  -1    2.91    0.30
   4  -7   1    2.52    0.23
   4  -7   1    3.27    0.28
  -4  -7  -1    2.59    0.37
   4   7   1    2.80    0.37
  -4   7  -1    3.61    0.45
   4   7   1    3.01    0.34
  -4   7  -1    3.05    0.30
  -5  -7  -1    0.17    0.22
   5  -7   1    0.24    0.12
   5  -7   1    0.23    0.15
  -5  -7  -1    0.20    0.19
  -5  -7  -1    0.26    0.19
  -5   7  -1    0.27    0.19
   5   7   1    0.18    0.21
  -5   7  -1    0.07    0.20
   5   7   1    0.05    0.23
   6  -7   1   11.88    0.51
  -6  -7  -1   11.47    0.63
  -6  -7  -1   13.37    0.93
  -6  -7  -1   12.17    0.58
   6  -7   1   11.64    0.76
   6  -7   1   11.79    0.46
   6   7   1   12.52    0.66
  -6   7  -1   11.96    0.59
   6   7   1   11.76    0.68
  -6   7  -1   12.30    0.63
  -7  -7  -1    8.11    0.62
   7  -7   1    6.76    0.42
   7  -7   1    6.97    0.77
  -7  -7  -1    7.22    0.64
  -7  -7  -1    6.38    0.53
   7  -7   1    7.20    0.36
   7   7   1    5.38    0.62
  -7   7  -1    7.89    0.53
  -7   7  -1    8.04    0.62
   7   7   1    7.08    0.58
  -8  -7  -1    5.42    0.68
   8  -7   1    5.21    0.33
  -8  -7  -1    5.05    0.66
   8  -7   1    4.66    0.39
  -8   7  -1    5.21    0.58
   8   7   1    4.56    0.62
  -8   7  -1    5.09    0.55
  -9  -7  -1    3.31    0.58
   9  -7   1    2.77    0.30
   9   7   1    4.09    0.56
  -9   7  -1    3.63    0.47
 -10  -7  -1    0.98    0.59
  10   7   1   -0.11    0.51
 -10   7  -1    0.83    0.45
 -10  -8   1    1.35    0.58
  10   8  -1    1.87    0.58
 -10   8   1    1.05    0.43
  -9  -8   1   -0.53    0.44
   9  -8  -1    0.12    0.25
  -9   8   1    0.15    0.34
   9   8  -1    0.83    0.46
   8  -8  -1   -0.38    0.21
   8  -8  -1   -0.01    0.32
  -8  -8   1   -0.68    0.34
   8   8  -1    1.03    0.38
  -8   8   1    0.40    0.29
   7  -8  -1    4.44    0.37
   7  -8  -1    4.54    0.61
   7  -8  -1    4.91    0.64
  -7  -8   1    4.79    0.63
  -7  -8   1    5.06    0.54
  -7   8   1    3.85    0.57
  -7   8   1    4.91    0.54
   7   8  -1    4.55    0.51
   6  -8  -1    3.70    0.32
  -6  -8   1    2.98    0.40
  -6  -8   1    3.59    0.43
  -6  -8   1    3.53    0.50
   6  -8  -1    3.32    0.46
  -6   8   1    3.70    0.50
  -6   8   1    3.19    0.39
   6   8  -1    3.46    0.47
   6   8  -1    4.10    0.53
  -5  -8   1   11.37    0.66
  -5  -8   1   10.82    0.55
   5  -8  -1   11.96    0.57
   5  -8  -1   11.31    0.51
  -5  -8   1   11.94    0.55
   5   8  -1   10.40    0.62
  -5   8   1   12.31    0.56
   5   8  -1   11.66    0.65
  -5   8   1   11.85    0.61
   4  -8  -1    8.13    0.41
  -4  -8   1    8.25    0.42
   4  -8  -1    8.31    0.46
  -4  -8   1    8.15    0.43
  -4  -8   1    8.25    0.54
  -4   8   1    7.80    0.44
   4   8  -1    7.26    0.49
   4   8  -1    8.06    0.52
   3  -8  -1    0.31    0.15
  -3  -8   1    0.42    0.16
   3  -8  -1    0.14    0.17
  -3  -8   1    0.41    0.21
   3   8  -1    0.17    0.20
  -3   8   1    0.31    0.16
   3   8  -1    0.61    0.20
  -3   8   1    0.16    0.16
  -2  -8   1    0.77    0.17
  -2  -8   1    0.67    0.21
   2  -8  -1    0.57    0.16
   2  -8  -1    0.71    0.18
   2   8  -1    0.44    0.17
  -2   8   1    0.48    0.17
   2   8  -1    0.74    0.20
  -2   8   1    0.81    0.17
  -1  -8   1    2.52    0.24
  -1  -8   1    2.90    0.30
   1  -8  -1    2.62    0.28
   1  -8  -1    2.21    0.26
  -1   8   1    2.64    0.26
   1   8  -1    2.85    0.25
   1   8  -1    2.59    0.30
  -1   8   1    3.55    0.29
   0  -8  -1    0.19    0.14
   0  -8   1    0.18    0.12
   0  -8   1    0.11    0.14
   0  -8  -1    0.29    0.14
   0   8  -1    0.22    0.14
   0   8  -1    0.23    0.12
   0   8   1    0.07    0.15
   0   8   1    0.06    0.12
  -1  -8  -1    0.44    0.16
   1  -8   1    0.82    0.17
   1  -8   1    0.62    0.16
  -1  -8  -1    0.37    0.15
   1   8   1    0.83    0.16
  -1   8  -1    0.64    0.15
   1   8   1    0.84    0.19
  -2  -8  -1    3.34    0.35
  -2  -8  -1    3.36    0.31
   2  -8   1    3.35    0.29
   2  -8   1    3.70    0.27
   2   8   1    3.74    0.31
  -2   8  -1    3.65    0.29
  -2   8  -1    3.04    0.41
   2   8   1    3.86    0.41
   3  -8   1    0.45    0.16
   3  -8   1    0.34    0.14
  -3  -8  -1    0.32    0.19
  -3  -8  -1    0.35    0.21
   3   8   1    0.37    0.18
   3   8   1    0.47    0.20
  -3   8  -1    0.35    0.16
  -3   8  -1    0.20    0.15
   4  -8   1    0.25    0.16
  -4  -8  -1    0.18    0.22
   4  -8   1    0.04    0.12
  -4  -8  -1   -0.04    0.16
  -4   8  -1    0.20    0.17
  -4   8  -1    0.01    0.17
   4   8   1   -0.43    0.19
   4   8   1    0.06    0.19
  -5  -8  -1   33.85    1.11
  -5  -8  -1   33.90    1.16
   5  -8   1   33.42    1.04
  -5  -8  -1   30.87    1.23
   5  -8   1   33.64    1.01
  -5   8  -1   33.55    1.16
   5   8   1   32.32    1.19
   5   8   1   34.62    1.22
  -5   8  -1   32.95    1.09
  -6  -8  -1    2.24    0.30
  -6  -8  -1    2.41    0.38
   6  -8   1    2.31    0.31
   6  -8   1    2.39    0.25
   6  -8   1    2.87    0.48
  -6  -8  -1    2.43    0.35
   6   8   1    1.45    0.36
   6   8   1    1.99    0.34
  -6   8  -1    2.32    0.29
  -6   8  -1    2.18    0.35
  -7  -8  -1    0.91    0.35
   7  -8   1    0.68    0.51
   7  -8   1    1.46    0.23
   7  -8   1    1.11    0.18
  -7  -8  -1    0.91    0.36
  -7   8  -1    1.56    0.30
  -7   8  -1    1.62    0.39
   7   8   1    1.02    0.33
  -8  -8  -1   -0.09    0.39
   8  -8   1    0.05    0.16
  -8  -8  -1   -0.07    0.38
   8  -8   1    0.26    0.19
  -8   8  -1    0.28    0.27
   8   8   1    0.77    0.38
  -8   8  -1   -0.27    0.51
  -9  -8  -1    0.60    0.46
   9   8   1    0.04    0.44
  -9   8  -1    1.05    0.37
 -10  -8  -1    1.79    0.70
  10   8   1    1.92    0.59
 -10   8  -1    1.70    0.47
  -9  -9   1    1.19    0.56
   9  -9  -1    1.65    0.34
   9   9  -1    1.06    0.52
  -9   9   1    1.62    0.41
   8  -9  -1    2.49    0.54
   8  -9  -1    2.78    0.31
  -8  -9   1    1.97    0.46
   8   9  -1    3.42    0.55
  -8   9   1    3.03    0.40
  -7  -9   1    0.89    0.33
   7  -9  -1    0.43    0.35
   7  -9  -1   -0.31    0.20
  -7  -9   1   -0.16    0.36
  -7   9   1    0.44    0.41
   7   9  -1   -0.25    0.30
  -7   9   1    0.16    0.24
  -6  -9   1   -0.28    0.30
  -6  -9   1   -0.10    0.25
   6  -9  -1    0.17    0.19
  -6  -9   1   -0.20    0.24
   6   9  -1    0.34    0.54
  -6   9   1    0.25    0.27
  -6   9   1   -0.13    0.32
   6   9  -1   -0.06    0.26
   5  -9  -1    6.47    0.40
  -5  -9   1    6.23    0.45
  -5  -9   1    5.48    0.76
  -5  -9   1    5.92    0.43
  -5   9   1    6.06    0.44
   5   9  -1    7.08    0.54
  -5   9   1    6.72    0.54
   5   9  -1    6.24    0.58
   4  -9  -1    4.52    0.36
   4  -9  -1    5.82    0.53
  -4  -9   1    4.55    0.49
  -4  -9   1    5.54    0.39
   4   9  -1    5.16    0.46
  -4   9   1    5.15    0.39
  -4   9   1    5.29    0.44
   4   9  -1    4.75    0.49
   3  -9  -1   11.10    0.52
  -3  -9   1   11.39    0.62
   3  -9  -1   10.62    0.60
  -3  -9   1   11.73    0.52
   3   9  -1   11.40    0.62
  -3   9   1   11.69    0.53
  -3   9   1   11.92    0.57
   3   9  -1   11.76    0.57
   2  -9  -1   12.60    0.55
  -2  -9   1   11.84    0.61
  -2  -9   1   12.31    0.52
   2   9  -1   12.03    0.55
  -2   9   1   12.50    0.65
  -2   9   1   12.47    0.54
   2   9  -1   13.39    0.61
  -1  -9   1    1.34    0.20
   1  -9  -1    1.38    0.21
   1  -9  -1    1.10    0.21
  -1  -9   1    1.29    0.24
   1   9  -1    1.44    0.40
  -1   9   1    1.30    0.19
   1   9  -1    1.47    0.20
   0  -9   1    4.63    0.37
   0  -9   1    4.86    0.31
   0  -9  -1    4.78    0.33
   0  -9  -1    4.72    0.38
   0   9   1    4.79    0.33
   0   9  -1    4.46    0.31
   0   9   1    4.83    0.44
   0   9  -1    4.55    0.36
   1  -9   1    0.27    0.16
  -1  -9  -1    0.23    0.16
  -1  -9  -1    0.16    0.19
   1  -9   1    0.13    0.15
  -1   9  -1    0.10    0.14
   1   9   1    0.15    0.14
  -1   9  -1    0.35    0.17
   1   9   1    0.15    0.19
   2  -9   1    0.35    0.16
  -2  -9  -1    0.27    0.18
   2  -9   1    0.44    0.17
  -2  -9  -1    0.42    0.21
   2   9   1    0.19    0.17
  -2   9  -1    0.10    0.16
  -2   9  -1    0.33    0.17
   2   9   1    0.21    0.19
  -3  -9  -1    3.26    0.42
  -3  -9  -1    2.89    0.33
   3  -9   1    3.47    0.29
   3  -9   1    2.72    0.31
  -3   9  -1    3.02    0.31
   3   9   1    2.56    0.37
  -3   9  -1    3.55    0.40
   3   9   1    3.78    0.41
   4  -9   1   24.49    0.84
  -4  -9  -1   24.53    0.88
  -4  -9  -1   24.17    1.01
   4  -9   1   24.57    0.81
  -4   9  -1   25.41    0.86
  -4   9  -1   25.54    0.92
   4   9   1   25.41    0.98
   4   9   1   25.11    0.96
  -5  -9  -1    0.26    0.24
   5  -9   1    0.54    0.20
   5  -9   1    0.75    0.17
  -5  -9  -1    0.11    0.22
  -5  -9  -1    0.37    0.29
   5   9   1    0.48    0.30
  -5   9  -1    0.74    0.28
   5   9   1    0.40    0.27
  -5   9  -1    0.39    0.19
  -6  -9  -1   -0.63    0.29
  -6  -9  -1   -0.03    0.26
   6  -9   1    0.16    0.19
   6  -9   1    0.57    0.45
   6  -9   1    0.20    0.16
   6   9   1    0.15    0.27
  -6   9  -1   -0.12    0.20
  -6   9  -1    0.06    0.31
   7  -9   1   -0.05    0.18
  -7  -9  -1   -0.23    0.36
  -7  -9  -1   -0.38    0.31
   7  -9   1    0.22    0.16
  -7   9  -1    0.00    0.24
   7   9   1   -0.11    0.32
  -7   9  -1   -0.13    0.39
  -8  -9  -1    1.19    0.44
  -8  -9  -1   -0.12    0.41
   8   9   1    0.75    0.42
  -8   9  -1    0.32    0.30
  -9  -9  -1    0.50    0.53
  -9   9  -1    1.79    0.41
   9   9   1    1.21    0.55
  -9 -10   1    1.13    0.60
   9  10  -1   -0.62    0.54
  -9  10   1    0.00    0.37
   8 -10  -1   -0.03    0.26
  -8 -10   1    0.58    0.47
   8  10  -1   -0.29    0.41
  -8  10   1   -0.25    0.30
  -7 -10   1   -0.13    0.34
   7 -10  -1    0.35    0.24
  -7 -10   1   -0.47    0.39
   7 -10  -1    0.15    0.57
   7  10  -1   -0.26    0.34
  -7  10   1   -0.04    0.26
  -6 -10   1    0.87    0.30
  -6 -10   1    0.63    0.36
   6 -10  -1    0.82    0.24
   6 -10  -1    0.14    0.30
   6  10  -1    0.27    0.29
  -6  10   1    0.25    0.23
  -6  10   1    1.24    0.41
   5 -10  -1    4.05    0.39
  -5 -10   1    4.28    0.41
   5 -10  -1    4.00    0.47
  -5 -10   1    3.22    0.42
  -5 -10   1    4.66    0.59
   5  10  -1    4.32    0.50
  -5  10   1    4.39    0.55
   4 -10  -1    0.55    0.20
  -4 -10   1    0.33    0.29
  -4 -10   1   -0.18    0.20
   4 -10  -1    0.07    0.22
   4  10  -1    0.60    0.31
   4  10  -1    0.11    0.24
  -4  10   1    0.00    0.25
  -4  10   1    0.18    0.18
   3 -10  -1    0.36    0.20
   3 -10  -1   -0.08    0.19
  -3 -10   1    0.07    0.23
   3  10  -1   -0.06    0.24
  -3  10   1    0.45    0.23
  -3  10   1   -0.04    0.17
   3  10  -1    0.13    0.20
  -2 -10   1   25.49    0.97
  -2 -10   1   25.41    0.85
   2 -10  -1   24.37    0.89
   2 -10  -1   24.62    0.87
  -2  10   1   25.52    0.92
  -2  10   1   23.30    0.85
   2  10  -1   24.35    0.94
   2  10  -1   23.67    0.88
   1 -10  -1    0.42    0.19
  -1 -10   1    0.26    0.17
   1 -10  -1    0.04    0.19
  -1 -10   1    0.39    0.22
  -1  10   1    0.24    0.22
  -1  10   1    0.18    0.16
   1  10  -1    0.06    0.17
   1  10  -1    0.46    0.21
   0 -10  -1    0.18    0.20
   0 -10   1   -0.17    0.15
   0 -10   1    0.00    0.18
   0 -10  -1    0.14    0.20
   0  10  -1    0.03    0.14
   0  10   1    0.16    0.21
   0  10   1   -0.07    0.15
   0  10  -1    0.10    0.19
  -1 -10  -1    0.06    0.17
   1 -10   1   -0.06    0.16
  -1 -10  -1   -0.11    0.21
   1 -10   1   -0.20    0.17
   1  10   1   -0.33    0.19
   1  10   1    0.10    0.16
  -1  10  -1    0.23    0.15
  -1  10  -1    0.10    0.19
   2 -10   1    1.82    0.24
  -2 -10  -1    1.62    0.32
  -2 -10  -1    1.39    0.24
   2 -10   1    1.43    0.24
   2  10   1    1.50    0.24
  -2  10  -1    1.70    0.25
   2  10   1    1.63    0.29
  -2  10  -1    1.41    0.22
   3 -10   1    0.35    0.19
   3 -10   1   -0.16    0.16
  -3 -10  -1    0.37    0.24
  -3  10  -1    0.54    0.23
   3  10   1    0.73    0.28
  -3  10  -1    0.25    0.18
   4 -10   1    1.32    0.24
  -4 -10  -1    1.52    0.28
   4 -10   1    1.17    0.21
  -4 -10  -1    1.21    0.32
   4  10   1    0.98    0.31
  -4  10  -1    1.26    0.23
  -4  10  -1    1.39    0.28
   4  10   1    1.47    0.30
  -5 -10  -1    4.25    0.45
   5 -10   1    4.05    0.37
   5 -10   1    3.63    0.33
  -5 -10  -1    3.66    0.44
  -5 -10  -1    4.16    0.57
  -5  10  -1    3.46    0.51
  -5  10  -1    4.29    0.39
   5  10   1    3.80    0.52
   6 -10   1    0.11    0.17
   6 -10   1    0.34    0.47
  -6 -10  -1   -0.34    0.33
  -6 -10  -1    0.32    0.30
   6 -10   1   -0.23    0.20
   6  10   1   -0.51    0.28
  -6  10  -1   -0.02    0.22
  -6  10  -1    0.46    0.38
  -7 -10  -1    0.29    0.36
  -7 -10  -1    0.43    0.41
  -7  10  -1    0.49    0.27
   7  10   1    0.27    0.35
  -8 -10  -1   -0.26    0.45
  -8 -10  -1   -0.76    0.45
   8  10   1   -0.08    0.43
  -8  10  -1    0.51    0.31
  -9 -10  -1   -0.77    1.01
  -9  10  -1    0.51    0.37
   9  10   1   -1.21    0.54
  -8 -11   1   -0.31    0.52
  -8  11   1    0.13    0.33
   8  11  -1    0.44    0.48
  -7 -11   1    1.30    0.44
  -7 -11   1    0.64    0.46
   7 -11  -1    1.49    0.30
  -7  11   1    1.56    0.35
   7  11  -1    1.40    0.43
  -6 -11   1   -0.08    0.31
   6 -11  -1   -0.20    0.33
  -6 -11   1    0.10    0.39
   6 -11  -1   -0.03    0.25
   6  11  -1    0.33    0.34
  -6  11   1    0.24    0.25
   5 -11  -1    1.33    0.33
   5 -11  -1    0.51    0.25
  -5 -11   1    1.58    0.39
  -5 -11   1    0.63    0.25
  -5  11   1    0.85    0.37
  -5  11   1    0.57    0.24
   5  11  -1    0.47    0.30
  -4 -11   1    0.49    0.31
   4 -11  -1    0.31    0.27
   4 -11  -1    0.60    0.24
  -4 -11   1    0.88    0.27
   4  11  -1    0.09    0.26
  -4  11   1    0.61    0.25
  -4  11   1    0.44    0.33
   3 -11  -1    4.78    0.44
  -3 -11   1    5.10    0.55
  -3 -11   1    4.86    0.42
   3 -11  -1    4.78    0.42
   3  11  -1    4.15    0.54
   3  11  -1    4.81    0.47
  -3  11   1    4.71    0.50
   2 -11  -1    5.84    0.58
   2 -11  -1    5.76    0.46
  -2 -11   1    5.67    0.41
  -2 -11   1    5.60    0.53
   2  11  -1    5.01    0.46
   2  11  -1    6.74    0.56
  -2  11   1    5.53    0.50
  -2  11   1    5.54    0.39
  -1 -11   1    1.33    0.23
   1 -11  -1    1.43    0.27
  -1 -11   1    1.17    0.28
   1 -11  -1    1.74    0.27
   1  11  -1    1.05    0.29
   1  11  -1    1.31    0.22
  -1  11   1    1.31    0.29
  -1  11   1    1.31    0.22
   0 -11  -1    0.04    0.19
   0 -11  -1    0.36    0.24
   0 -11   1    0.27    0.17
   0 -11   1    0.16    0.21
   0  11   1    0.43    0.26
   0  11  -1    0.10    0.16
   0  11   1    0.28    0.18
   0  11  -1    0.50    0.26
  -1 -11  -1    2.26    0.33
   1 -11   1    1.09    0.26
   1 -11   1    1.86    0.26
  -1 -11  -1    1.29    0.29
   1  11   1    1.01    0.31
  -1  11  -1    1.31    0.22
  -1  11  -1    1.94    0.31
   1  11   1    0.81    0.29
   2 -11   1    1.50    0.26
  -2 -11  -1    1.83    0.27
   2 -11   1    1.82    0.40
  -2 -11  -1    1.88    0.34
  -2  11  -1    1.22    0.22
  -2  11  -1    1.54    0.29
   2  11   1    1.42    0.34
   2  11   1    1.55    0.27
   3 -11   1    0.84    0.23
   3 -11   1    0.56    0.22
  -3 -11  -1    0.18    0.27
  -3 -11  -1    0.27    0.23
   3  11   1    0.30    0.23
   3  11   1    0.76    0.30
  -3  11  -1    0.30    0.27
   4 -11   1    2.25    0.28
  -4 -11  -1    1.34    0.28
   4 -11   1    1.61    0.24
  -4 -11  -1    1.38    0.37
  -4  11  -1    2.61    0.36
   4  11   1    1.65    0.34
  -4  11  -1    1.63    0.31
  -5 -11  -1    1.24    0.31
   5 -11   1    1.03    0.24
   5 -11   1    0.56    0.20
  -5 -11  -1    0.46    0.37
  -5  11  -1    0.48    0.23
   5  11   1    0.93    0.37
  -5  11  -1    1.68    0.39
   6 -11   1    0.45    0.17
  -6 -11  -1   -0.33    0.39
  -6 -11  -1    0.05    0.32
   6  11   1    0.12    0.37
  -6  11  -1    0.16    0.24
  -7 -11  -1    0.37    0.46
  -7 -11  -1   -0.09    0.74
   7  11   1   -0.33    0.41
  -7  11  -1   -0.04    0.28
  -8 -11  -1    2.31    0.57
  -8 -11  -1    1.82    0.59
   8  11   1    1.99    0.57
  -8  11  -1    0.86    0.37
  -7 -12   1    0.26    0.53
  -7 -12   1    1.23    0.48
  -7  12   1    0.70    0.32
   7  12  -1    0.72    0.47
  -6 -12   1    0.09    0.35
  -6 -12   1    0.08    0.44
   6 -12  -1    0.01    0.29
  -6  12   1    0.19    0.28
   6  12  -1   -0.05    0.39
  -5 -12   1    0.16    0.28
  -5 -12   1    0.51    0.41
   5 -12  -1    0.38    0.27
   5 -12  -1    0.10    0.36
  -5  12   1    0.23    0.26
   5  12  -1   -0.24    0.34
  -4 -12   1    0.30    0.24
  -4 -12   1    0.21    0.34
   4 -12  -1   -0.06    0.44
  -4 -12   1    0.39    0.32
   4 -12  -1    0.60    0.28
   4  12  -1   -0.09    0.28
  -4  12   1    0.32    0.25
  -3 -12   1    0.11    0.24
   3 -12  -1    0.00    0.26
   3 -12  -1    0.20    0.27
  -3 -12   1    0.45    0.32
   3  12  -1    0.64    0.28
  -3  12   1    0.16    0.21
  -3  12   1    0.13    0.37
  -2 -12   1    3.74    0.40
   2 -12  -1    3.32    0.37
   2 -12  -1    2.66    0.35
  -2 -12   1    3.57    0.51
  -2  12   1    3.28    0.37
   2  12  -1    3.27    0.41
  -2  12   1    3.44    0.41
   1 -12  -1    0.35    0.27
  -1 -12   1    0.29    0.21
   1 -12  -1    0.52    0.24
  -1 -12   1    0.04    0.28
   1  12  -1    0.03    0.29
   1  12  -1    0.01    0.20
  -1  12   1    0.40    0.30
  -1  12   1    0.11    0.19
   0 -12  -1    0.25    0.22
   0 -12   1    0.01    0.25
   0 -12   1    0.38    0.22
   0 -12  -1   -0.05    0.25
   0  12   1    0.63    0.31
   0  12   1    0.01    0.19
   0  12  -1    0.31    0.20
   0  12  -1    0.12    0.29
  -1 -12  -1   -0.16    0.27
  -1 -12  -1    0.19    0.22
   1 -12   1   -0.19    0.23
   1 -12   1    0.06    0.23
  -1  12  -1    0.29    0.30
   1  12   1    0.00    0.36
   1  12   1   -0.40    0.18
  -1  12  -1   -0.05    0.17
  -2 -12  -1    0.39    0.24
   2 -12   1    0.25    0.24
  -2 -12  -1    0.08    0.29
   2 -12   1    0.63    0.24
  -2  12  -1    0.40    0.20
  -2  12  -1    0.70    0.30
   2  12   1   -0.10    0.23
  -3 -12  -1   -0.08    0.26
   3 -12   1    0.28    0.27
   3 -12   1    0.00    0.23
  -3 -12  -1    0.09    0.33
  -3  12  -1    0.36    0.20
   3  12   1   -0.07    0.25
  -3  12  -1    0.32    0.33
   4 -12   1    0.28    0.23
   4 -12   1    0.71    0.29
  -4 -12  -1    0.52    0.37
  -4  12  -1    0.58    0.26
  -4  12  -1    1.30    0.42
   4  12   1    0.09    0.31
   5 -12   1    0.29    0.21
   5 -12   1    0.53    0.26
  -5 -12  -1    0.18    0.31
  -5 -12  -1    0.62    0.42
   5  12   1    0.11    0.35
  -5  12  -1   -0.12    0.24
  -6 -12  -1    0.46    0.46
  -6 -12  -1    0.50    0.38
   6  12   1    0.27    0.42
  -6  12  -1    0.34    0.28
  -7 -12  -1    0.24    0.54
  -7 -12  -1    0.16    0.48
   7  12   1   -0.74    0.47
  -7  12  -1    0.32    0.32
  -7  13   1    0.93    0.39
  -6 -13   1    0.34    0.53
  -6 -13   1    0.33    0.51
  -6  13   1    1.16    0.37
   6  13  -1   -0.16    0.47
  -5 -13   1   -0.13    0.43
  -5 -13   1    0.43    0.32
   5 -13  -1   -0.25    0.33
   5  13  -1    0.08    0.42
  -5  13   1   -0.02    0.30
   4 -13  -1    0.09    0.32
  -4 -13   1    0.41    0.43
   4 -13  -1    0.56    0.37
  -4 -13   1   -0.51    0.26
  -4  13   1    0.19    0.26
   4  13  -1   -0.81    0.32
  -3 -13   1    0.90    0.39
  -3 -13   1   -0.36    0.29
   3 -13  -1    0.79    0.34
   3 -13  -1   -0.17    0.30
   3  13  -1    0.33    0.30
  -3  13   1   -0.23    0.21
   2 -13  -1    0.97    0.32
  -2 -13   1    0.63    0.27
   2 -13  -1   -0.11    0.29
  -2 -13   1    0.62    0.35
  -2  13   1    0.03    0.21
   2  13  -1    0.32    0.26
  -1 -13   1    0.36    0.27
   1 -13  -1    0.52    0.31
  -1 -13   1    0.40    0.32
   1 -13  -1    0.64    0.31
   1  13  -1    0.72    0.27
  -1  13   1    0.75    0.24
   0 -13   1    0.46    0.27
   0 -13   1    0.97    0.32
   0 -13  -1    0.96    0.29
   0 -13  -1    0.76    0.40
   0  13   1    0.59    0.24
   0  13  -1    0.47    0.23
  -1 -13  -1    0.27    0.33
   1 -13   1    0.91    0.29
   1 -13   1    0.49    0.29
  -1 -13  -1    0.54    0.28
  -1  13  -1    0.25    0.22
   1  13   1    0.32    0.25
   2 -13   1   -0.20    0.26
  -2 -13  -1    0.37    0.33
  -2 -13  -1    0.46    0.29
   2 -13   1    0.66    0.28
   2  13   1   -0.03    0.27
  -2  13  -1    0.11    0.21
  -3 -13  -1    0.25    0.37
   3 -13   1   -0.03    0.27
  -3  13  -1   -0.31    0.20
   3  13   1    0.18    0.30
  -4 -13  -1    0.77    0.45
   4 -13   1   -0.13    0.25
   4  13   1   -0.55    0.32
  -4  13  -1   -0.06    0.24
  -5 -13  -1    0.64    0.48
  -5 -13  -1    0.64    0.38
  -5  13  -1    1.17    0.32
   5  13   1    1.04    0.46
  -6 -13  -1   -0.12    0.53
  -6 -13  -1    0.58    0.45
   6  13   1   -0.65    0.46
  -6  13  -1    0.14    0.34
  -5 -14   1    0.71    0.55
  -5  14   1   -0.15    0.33
   5  14  -1   -0.02    0.48
  -4 -14   1    1.76    0.53
   4 -14  -1    1.83    0.39
  -4 -14   1    1.25    0.50
   4  14  -1    0.79    0.45
  -4  14   1    1.21    0.32
  -3 -14   1    0.79    0.44
   3 -14  -1    1.31    0.39
  -3  14   1    0.94    0.29
   3  14  -1    0.99    0.41
   2 -14  -1    3.20    0.75
  -2 -14   1    4.01    0.53
   2 -14  -1    3.79    0.47
  -2 -14   1    4.10    0.55
   2  14  -1    3.54    0.45
  -2  14   1    2.64    0.35
   1 -14  -1   -0.08    0.36
   1 -14  -1   -0.65    0.33
  -1 -14   1    0.36    0.38
  -1 -14   1    0.55    0.31
  -1  14   1   -0.21    0.24
   1  14  -1   -0.28    0.27
   0 -14   1    0.43    0.32
   0 -14  -1    0.58    0.35
   0 -14  -1   -0.44    0.34
   0 -14   1    0.82    0.37
   0  14  -1   -0.51    0.24
   0  14   1   -0.05    0.25
  -1 -14  -1    0.57    0.38
   1 -14   1   -0.22    0.34
   1 -14   1    0.18    0.34
  -1  14  -1    0.14    0.27
   1  14   1   -0.38    0.26
   2 -14   1    0.38    0.33
  -2 -14  -1    0.38    0.41
   2  14   1    0.17    0.32
  -2  14  -1   -0.22    0.23
   3 -14   1    0.35    0.33
  -3 -14  -1    1.44    0.48
   3  14   1    0.40    0.36
  -3  14  -1    0.30    0.26
  -4 -14  -1    2.62    0.57
  -4  14  -1    1.57    0.32
   4  14   1    1.07    0.45
  -5 -14  -1    1.27    0.60
  -5 -14  -1    0.67    0.56
   5  14   1   -0.29    0.49
  -4 -15   1   -0.79    0.54
  -4  15   1   -0.28    0.33
  -3 -15   1    0.36    0.52
   3  15  -1   -0.61    0.42
  -3  15   1    0.01    0.29
  -2 -15   1    0.07    0.46
   2 -15  -1    0.74    0.44
   2  15  -1    0.90    0.40
  -2  15   1    0.47    0.32
   1 -15  -1    0.08    0.42
  -1 -15   1    1.42    0.46
   1  15  -1    0.51    0.35
  -1  15   1    0.66    0.33
   0 -15   1    1.92    0.48
   0 -15  -1    1.76    0.49
   0  15  -1    1.42    0.35
   0  15   1    1.34    0.37
   1 -15   1   -0.02    0.41
  -1 -15  -1    0.49    0.46
  -1  15  -1   -0.23    0.28
   1  15   1   -0.04    0.34
  -2 -15  -1    0.66    0.48
   2 -15   1    0.83    0.43
   2  15   1    0.22    0.38
  -2  15  -1   -0.02    0.30
  -3 -15  -1    0.04    0.54
   3  15   1    0.69    0.45
  -3  15  -1   -0.46    0.28
  12   0  -2    5.99    0.85
 -12   0   2    7.60    1.12
  11   0  -2    0.55    0.43
 -11   0   2    1.13    0.48
 -10   0   2    1.82    0.44
  10   0  -2    1.62    0.38
  10   0  -2    1.00    0.45
   9   0  -2   -0.37    0.43
   9   0  -2    0.21    0.27
  -9   0   2   -0.09    0.38
   9   0  -2    0.12    0.32
  -9   0   2   -0.33    0.30
   8   0  -2    4.79    0.59
  -8   0   2    5.06    0.53
   8   0  -2    5.45    0.51
  -8   0   2    4.93    0.54
   8   0  -2    5.20    0.49
  -7   0   2   37.81    1.31
  -7   0   2   37.77    1.32
   7   0  -2   38.85    1.35
   7   0  -2   37.33    1.27
   7   0  -2   40.17    1.30
  -6   0   2    3.97    0.38
   6   0  -2    4.22    0.56
   6   0  -2    4.88    0.42
   6   0  -2    3.66    0.34
  -6   0   2    4.40    0.38
   5   0  -2   11.16    0.50
   5   0  -2   11.26    0.53
   5   0  -2   11.24    0.50
  -5   0   2   10.98    0.50
  -5   0   2   11.33    0.52
   4   0  -2    1.96    0.24
   4   0  -2    1.63    0.21
  -4   0   2    1.58    0.23
   4   0  -2    1.52    0.22
  -4   0   2    1.82    0.22
  -3   0   2   61.92    1.67
  -3   0   2   57.70    1.66
   3   0  -2   56.32    1.66
  -2   0   2   17.05    0.57
  -2   0   2   18.26    0.57
   2   0  -2   18.64    0.58
   2   0  -2   19.47    0.58
   1   0  -2  120.14    3.06
  -1   0   2  124.78    3.06
   1   0  -2  104.87    3.06
  -1   0   2  110.30    3.06
   0   0   2  168.64    4.51
  -1   0  -2   16.96    0.48
   1   0   2   16.13    0.47
  -1   0  -2   16.63    0.48
   1   0   2   16.74    0.47
  -2   0  -2  265.91    7.08
  -2   0  -2  264.76    7.04
   2   0   2  264.22    7.02
  -2   0  -2  270.32    7.03
   3   0   2    3.59    0.25
  -3   0  -2    3.61    0.27
   3   0   2    3.69    0.20
  -3   0  -2    3.67    0.22
   3   0   2    3.50    0.19
  -3   0  -2    3.58    0.21
   4   0   2    2.43    0.20
  -4   0  -2    2.41    0.23
  -4   0  -2    2.30    0.22
   4   0   2    2.35    0.19
   4   0   2    2.43    0.27
  -4   0  -2    2.24    0.26
  -5   0  -2    3.52    0.30
   5   0   2    3.05    0.39
  -5   0  -2    3.17    0.36
   5   0   2    3.62    0.26
  -5   0  -2    3.74    0.30
   5   0   2    3.29    0.26
   6   0   2   -0.01    0.14
   6   0   2   -0.14    0.14
  -6   0  -2    0.02    0.17
  -6   0  -2    0.27    0.19
   7   0   2    0.08    0.18
  -7   0  -2   -0.15    0.20
   7   0   2   -0.08    0.18
  -7   0  -2   -0.07    0.24
   8   0   2    1.86    0.29
  -8   0  -2    1.40    0.34
  -8   0  -2    1.23    0.32
   8   0   2    1.62    0.28
   9   0   2    4.39    0.46
  -9   0  -2    3.64    0.50
  -9   0  -2    3.08    0.44
  10   0   2    9.37    0.69
  10   0   2    8.77    0.64
 -10   0  -2    9.90    0.80
  11   0   2    0.85    0.38
 -11   0  -2    0.91    0.50
 -12  -1   2    2.43    0.83
  12  -1  -2    1.34    0.50
  12   1  -2    2.30    0.57
 -12   1   2    1.50    0.64
 -11  -1   2    0.57    0.48
  11  -1  -2    0.57    0.64
  11  -1  -2    1.32    0.40
 -11   1   2    1.28    0.49
  11   1  -2    1.69    0.47
  10  -1  -2    2.28    0.38
  10  -1  -2    1.91    0.45
 -10  -1   2    2.17    0.46
  10   1  -2    2.46    0.44
  10   1  -2    2.35    0.48
 -10   1   2    1.93    0.46
   9  -1  -2    2.62    0.37
  -9  -1   2    2.03    0.41
  -9  -1   2    2.26    0.43
   9  -1  -2    1.32    0.44
   9  -1  -2    1.79    0.36
  -9   1   2    2.27    0.45
   9   1  -2    1.41    0.43
  -9   1   2    2.66    0.43
   9   1  -2    2.10    0.40
   9   1  -2    2.23    0.40
   8  -1  -2    0.04    0.30
   8  -1  -2    0.04    0.26
  -8  -1   2    0.48    0.27
  -8  -1   2    0.34    0.29
   8  -1  -2   -0.13    0.21
  -8   1   2   -0.15    0.25
   8   1  -2    0.07    0.26
   8   1  -2    0.11    0.25
   8   1  -2    0.37    0.33
  -8   1   2   -0.19    0.28
   7  -1  -2   -0.32    0.20
   7  -1  -2    0.11    0.28
  -7  -1   2   -0.35    0.21
  -7  -1   2   -0.21    0.21
   7  -1  -2    0.24    0.19
   7   1  -2   -0.21    0.23
  -7   1   2   -0.12    0.23
   7   1  -2    0.20    0.21
  -7   1   2    0.08    0.24
   7   1  -2    0.21    0.34
   6  -1  -2    0.96    0.26
  -6  -1   2    0.94    0.22
   6  -1  -2    1.05    0.20
  -6  -1   2    1.38    0.25
   6  -1  -2    0.74    0.22
   6   1  -2    0.90    0.24
   6   1  -2    1.10    0.23
  -6   1   2    0.99    0.22
  -6   1   2    1.08    0.23
   6   1  -2    1.14    0.21
  -5  -1   2    3.57    0.32
   5  -1  -2    4.34    0.35
   5  -1  -2    3.73    0.29
   5  -1  -2    4.20    0.32
  -5  -1   2    3.46    0.31
  -5   1   2    4.12    0.32
   5   1  -2    4.08    0.33
  -5   1   2    3.54    0.32
   5   1  -2    4.32    0.31
   5   1  -2    3.91    0.32
   4  -1  -2    6.88    0.35
  -4  -1   2    7.04    0.36
  -4  -1   2    7.14    0.37
   4  -1  -2    7.46    0.37
  -4   1   2    7.08    0.36
   4   1  -2    7.16    0.37
   4   1  -2    7.31    0.36
  -4   1   2    7.60    0.37
   4   1  -2    7.34    0.37
  -3  -1   2    0.16    0.10
   3  -1  -2    0.52    0.12
   3  -1  -2    0.37    0.11
  -3  -1   2    0.52    0.13
   3   1  -2    0.38    0.12
   3   1  -2    0.46    0.12
   3   1  -2    0.43    0.12
  -3   1   2    0.45    0.11
  -3   1   2    0.41    0.13
   2  -1  -2    1.76    0.16
  -2  -1   2    1.60    0.18
  -2  -1   2    1.92    0.16
   2  -1  -2    1.80    0.18
   2   1  -2    2.18    0.17
  -2   1   2    1.56    0.18
  -2   1   2    1.63    0.16
   1  -1  -2   22.05    0.64
  -1  -1   2   22.03    0.62
  -1  -1   2   20.70    0.66
   1  -1  -2   22.89    0.63
  -1   1   2   22.30    0.63
   1   1  -2   20.33    0.65
   1   1  -2   23.14    0.64
  -1   1   2   22.06    0.63
   0  -1  -2    1.54    0.09
   0   1   2    1.42    0.09
   0   1   2    1.67    0.08
   1  -1   2    1.31    0.13
  -1  -1  -2    1.44    0.10
  -1   1  -2    1.21    0.15
   1   1   2    1.40    0.10
  -2  -1  -2  992.43   24.78
  -2  -1  -2  897.88   24.75
   2  -1   2  883.30   24.77
   2  -1   2  918.37   24.54
   2  -1   2  943.22   24.53
  -2   1  -2 1000.00   24.66
   2   1   2  924.13   24.73
  -2   1  -2  921.98   24.93
  -2   1  -2  836.61   24.77
   2   1   2  993.53   24.79
  -3  -1  -2   77.06    2.21
   3  -1   2   83.71    2.17
  -3  -1  -2   82.29    2.23
  -3  -1  -2   79.98    2.26
   3  -1   2   80.09    2.26
   3  -1   2   78.32    2.17
  -3   1  -2   80.75    2.20
  -3   1  -2   79.03    2.20
  -3   1  -2   78.42    2.26
   3   1   2   81.86    2.21
   3   1   2   81.04    2.20
   4  -1   2    6.79    0.39
   4  -1   2    6.88    0.29
  -4  -1  -2    6.79    0.34
  -4  -1  -2    6.98    0.39
  -4  -1  -2    6.66    0.33
   4  -1   2    6.68    0.29
  -4   1  -2    6.66    0.32
  -4   1  -2    6.84    0.33
   4   1   2    6.84    0.32
   4   1   2    7.24    0.33
  -5  -1  -2   18.72    0.70
  -5  -1  -2   19.37    0.76
   5  -1   2   18.96    0.64
  -5  -1  -2   19.50    0.72
   5  -1   2   18.58    0.63
  -5   1  -2   19.32    0.70
  -5   1  -2   19.01    0.69
   5   1   2   18.64    0.68
   5   1   2   19.80    0.68
  -6  -1  -2    3.49    0.42
   6  -1   2    3.52    0.28
   6  -1   2    3.98    0.44
  -6  -1  -2    3.28    0.36
  -6  -1  -2    3.50    0.36
   6  -1   2    3.43    0.29
  -6   1  -2    3.46    0.51
   6   1   2    3.41    0.32
   6   1   2    3.43    0.32
  -6   1  -2    3.28    0.36
   7  -1   2   -0.30    0.15
   7  -1   2    0.25    0.31
  -7  -1  -2   -0.15    0.20
   7  -1   2    0.10    0.17
  -7  -1  -2    0.04    0.24
   7   1   2    0.01    0.20
  -7   1  -2   -0.22    0.19
  -7   1  -2   -0.05    0.38
   7   1   2   -0.20    0.18
   8  -1   2    6.58    0.43
  -8  -1  -2    6.13    0.56
  -8  -1  -2    5.25    0.55
   8   1   2    6.11    0.47
   8   1   2    5.95    0.47
  -8   1  -2    6.91    0.55
  -8   1  -2    6.54    0.57
   9  -1   2    0.95    0.29
   9  -1   2    1.54    0.28
  -9  -1  -2    1.06    0.40
  -9  -1  -2    1.20    0.39
  -9   1  -2    1.03    0.37
   9   1   2    1.24    0.33
   9   1   2    1.67    0.33
  -9   1  -2    2.03    0.45
  10  -1   2    0.26    0.28
 -10  -1  -2   -0.25    0.39
  10  -1   2    0.57    0.51
  10   1   2    0.28    0.38
 -10   1  -2    0.00    0.38
  10   1   2   -0.22    0.33
  11  -1   2    0.75    0.35
 -11  -1  -2   -0.77    0.48
  11   1   2    0.53    0.41
 -11   1  -2    0.47    0.48
  12  -2  -2   -0.31    0.44
  12   2  -2    0.20    0.55
 -12   2   2    0.18    0.61
  11  -2  -2    1.19    0.39
 -11  -2   2    1.20    0.51
  11  -2  -2    0.03    0.54
 -11   2   2    0.94    0.47
  11   2  -2    0.62    0.47
 -10  -2   2   -0.44    0.38
  10  -2  -2   -0.20    0.39
  10   2  -2   -0.06    0.34
 -10   2   2    0.19    0.37
  10   2  -2    0.66    0.53
   9  -2  -2    0.11    0.32
  -9  -2   2   -0.11    0.42
   9  -2  -2   -0.61    0.49
  -9  -2   2    0.23    0.32
   9  -2  -2    0.61    0.27
   9   2  -2    0.49    0.36
  -9   2   2    0.38    0.33
  -9   2   2    0.14    0.39
   9   2  -2    0.49    0.34
  -8  -2   2    4.63    0.48
  -8  -2   2    4.22    0.53
   8  -2  -2    4.58    0.56
   8  -2  -2    5.46    0.61
   8  -2  -2    4.45    0.41
  -8   2   2    4.90    0.54
  -8   2   2    4.21    0.51
   8   2  -2    4.13    0.48
   8   2  -2    3.81    0.51
   7  -2  -2    0.96    0.31
  -7  -2   2    0.85    0.27
  -7  -2   2    0.96    0.27
   7  -2  -2    1.09    0.26
   7  -2  -2    1.02    0.22
  -7   2   2    0.69    0.27
   7   2  -2    1.12    0.28
  -7   2   2    0.93    0.27
   7   2  -2    0.90    0.51
   7   2  -2    1.10    0.25
  -6  -2   2   21.11    0.79
   6  -2  -2   22.34    0.79
   6  -2  -2   20.23    0.74
  -6  -2   2   20.98    0.83
   6  -2  -2   20.22    0.84
   6   2  -2   21.07    0.80
   6   2  -2   19.80    0.79
  -6   2   2   20.39    0.80
  -6   2   2   19.17    0.79
   6   2  -2   17.55    1.08
   5  -2  -2    1.74    0.26
  -5  -2   2    2.03    0.26
  -5  -2   2    1.42    0.22
   5  -2  -2    1.76    0.23
   5   2  -2    1.52    0.22
  -5   2   2    1.70    0.23
  -5   2   2    2.10    0.26
   5   2  -2    1.39    0.20
   5   2  -2    1.75    0.24
   4  -2  -2    0.03    0.12
  -4  -2   2    0.08    0.12
   4  -2  -2    0.02    0.10
  -4  -2   2   -0.11    0.11
  -4   2   2   -0.04    0.12
  -4   2   2   -0.14    0.10
   4   2  -2    0.06    0.13
   4   2  -2    0.03    0.12
   4   2  -2    0.09    0.11
  -3  -2   2   14.18    0.52
  -3  -2   2   12.52    0.48
   3  -2  -2   13.69    0.48
   3  -2  -2   14.26    0.50
   3   2  -2   14.15    0.48
  -3   2   2   13.76    0.50
  -3   2   2   14.46    0.50
   3   2  -2   13.66    0.50
   3   2  -2   13.87    0.51
   2  -2  -2   -0.02    0.10
  -2  -2   2    0.15    0.08
   2  -2  -2    0.13    0.08
  -2  -2   2   -0.03    0.09
   2   2  -2    0.12    0.08
  -2   2   2    0.08    0.08
  -2   2   2    0.11    0.11
   2   2  -2    0.17    0.08
   2   2  -2    0.24    0.09
  -1  -2   2   97.81    2.69
  -1  -2   2  107.16    2.73
   1  -2  -2   99.40    2.71
   1  -2  -2  103.38    2.72
   1   2  -2  101.25    2.72
   1   2  -2   98.66    2.70
  -1   2   2  102.51    2.71
   0  -2   2   68.58    1.80
   0  -2   2   66.78    1.79
   0  -2  -2   62.71    1.82
   0  -2  -2   70.30    1.84
   0  -2   2   70.80    1.81
   0   2   2   70.02    1.84
   0   2   2   63.55    1.82
   0   2  -2   70.75    1.82
  -1  -2  -2    0.95    0.12
  -1  -2  -2    1.01    0.11
   1  -2   2    0.82    0.10
   1   2   2    0.92    0.11
  -1   2  -2    0.73    0.06
  -1   2  -2    0.62    0.06
   2  -2   2    9.57    0.38
   2  -2   2    9.47    0.27
   2  -2   2    9.35    0.27
  -2  -2  -2    8.81    0.34
  -2  -2  -2    9.32    0.36
  -2   2  -2    9.85    0.30
   2   2   2    9.66    0.35
   2   2   2    9.03    0.34
   3  -2   2   35.66    1.11
   3  -2   2   36.14    1.00
  -3  -2  -2   35.30    1.08
  -3  -2  -2   34.93    1.06
  -3  -2  -2   35.99    1.10
   3  -2   2   37.51    1.00
   3   2   2   36.00    1.07
  -3   2  -2   34.05    1.03
   3   2   2   36.83    1.07
  -3   2  -2   37.32    1.05
  -4  -2  -2   10.46    0.46
   4  -2   2   10.52    0.36
  -4  -2  -2   10.51    0.48
  -4  -2  -2   11.33    0.45
   4  -2   2   10.35    0.38
   4  -2   2   10.56    0.49
   4   2   2   10.66    0.43
  -4   2  -2   10.22    0.42
   4   2   2   10.84    0.45
  -4   2  -2   10.11    0.41
  -5  -2  -2    0.06    0.15
   5  -2   2    0.27    0.12
  -5  -2  -2    0.22    0.18
   5  -2   2    0.14    0.21
   5  -2   2    0.24    0.11
  -5  -2  -2    0.28    0.16
   5   2   2    0.41    0.14
  -5   2  -2    0.21    0.15
   5   2   2    0.41    0.16
  -5   2  -2    0.00    0.14
   6  -2   2    0.62    0.40
  -6  -2  -2    1.01    0.25
  -6  -2  -2    1.12    0.23
  -6  -2  -2    1.05    0.25
   6  -2   2    1.25    0.18
   6  -2   2    0.78    0.15
   6   2   2    1.09    0.22
   6   2   2    0.91    0.22
  -6   2  -2    0.82    0.22
   7  -2   2   -0.13    0.29
   7  -2   2    0.03    0.17
   7  -2   2    0.36    0.15
  -7  -2  -2    0.12    0.24
  -7  -2  -2   -0.01    0.23
  -7   2  -2   -0.12    0.27
   7   2   2   -0.13    0.20
   7   2   2    0.14    0.21
  -7   2  -2   -0.36    0.20
  -8  -2  -2    5.99    0.57
  -8  -2  -2    6.52    0.59
   8  -2   2    6.37    0.71
   8  -2   2    6.13    0.39
   8  -2   2    5.63    0.42
  -8   2  -2    6.32    0.54
  -8   2  -2    5.94    0.59
   8   2   2    6.28    0.50
   8   2   2    6.36    0.51
   9  -2   2    0.14    0.20
   9  -2   2   -0.01    0.31
  -9  -2  -2   -0.50    0.30
  -9   2  -2    0.46    0.32
   9   2   2   -0.23    0.31
  -9   2  -2    0.26    0.41
   9   2   2    0.25    0.31
 -10  -2  -2   -0.11    0.40
  10  -2   2   -0.23    0.30
  10  -2   2    0.00    0.26
 -10   2  -2   -0.42    0.36
  10   2   2   -0.28    0.38
  10   2   2   -0.02    0.42
  11  -2   2    0.68    0.32
 -11  -2  -2   -0.33    0.52
 -11   2  -2    1.34    0.52
  11   2   2    0.37    0.44
  11  -3  -2    4.77    0.60
 -11  -3   2    3.05    0.60
  11  -3  -2    4.62    0.69
  11   3  -2    4.16    0.59
 -11   3   2    3.54    0.60
  10  -3  -2   -0.17    0.31
  10  -3  -2   -0.06    0.41
 -10  -3   2    0.01    0.39
 -10   3   2   -0.60    0.37
  10   3  -2   -0.35    0.37
  -9  -3   2   -0.20    0.31
   9  -3  -2   -0.17    0.31
   9  -3  -2    0.18    0.25
  -9   3   2    0.02    0.32
  -9   3   2    0.32    0.41
   9   3  -2    0.25    0.40
   9   3  -2   -0.02    0.30
  -8  -3   2    1.19    0.33
   8  -3  -2    0.82    0.24
   8  -3  -2    0.50    0.36
  -8  -3   2    0.56    0.52
   8   3  -2    0.79    0.30
  -8   3   2    0.84    0.29
   8   3  -2    0.20    0.27
  -8   3   2    0.76    0.33
   7  -3  -2    2.66    0.32
  -7  -3   2    3.13    0.37
   7  -3  -2    2.86    0.39
   7  -3  -2    2.63    0.38
  -7  -3   2    2.44    0.35
   7   3  -2    2.66    0.34
  -7   3   2    2.49    0.34
   7   3  -2    4.00    0.45
  -7   3   2    3.15    0.37
  -6  -3   2    0.28    0.21
  -6  -3   2   -0.04    0.18
   6  -3  -2    0.11    0.18
   6  -3  -2    0.12    0.15
   6   3  -2   -0.17    0.20
   6   3  -2    0.05    0.19
  -6   3   2    0.00    0.19
  -6   3   2    0.06    0.20
  -5  -3   2   11.22    0.60
   5  -3  -2   11.83    0.49
   5  -3  -2   12.00    0.52
  -5  -3   2   12.12    0.56
  -5   3   2   12.52    0.54
   5   3  -2   10.96    0.53
  -5   3   2   12.11    0.54
   4  -3  -2    0.10    0.11
  -4  -3   2    0.19    0.12
  -4  -3   2    0.09    0.13
   4  -3  -2    0.03    0.12
  -4   3   2   -0.05    0.13
   4   3  -2    0.21    0.13
   4   3  -2    0.12    0.12
  -4   3   2    0.07    0.11
  -3  -3   2    4.88    0.25
  -3  -3   2    5.16    0.26
   3  -3  -2    4.66    0.27
  -3  -3   2    5.01    0.29
   3  -3  -2    4.57    0.25
   3   3  -2    5.18    0.28
  -3   3   2    4.62    0.27
  -3   3   2    5.09    0.28
   3   3  -2    4.62    0.29
  -2  -3   2   -0.03    0.12
  -2  -3   2    0.11    0.10
  -2  -3   2    0.06    0.09
   2  -3  -2   -0.10    0.06
   2  -3  -2   -0.07    0.09
  -2   3   2    0.05    0.09
   2   3  -2    0.05    0.08
   2   3  -2    0.05    0.09
  -2   3   2   -0.10    0.07
   1  -3  -2   35.84    0.99
  -1  -3   2   33.20    0.95
  -1  -3   2   34.49    0.99
   1  -3  -2   33.54    0.98
  -1   3   2   34.06    0.99
  -1   3   2   35.56    0.98
   1   3  -2   35.20    0.99
   1   3  -2   33.77    0.96
   0  -3  -2   26.79    0.77
   0  -3  -2   26.95    0.78
   0  -3   2   25.65    0.73
   0   3  -2   26.01    0.76
   0   3   2   27.85    0.78
   0   3   2   25.82    0.76
   0   3  -2   26.97    0.74
   1  -3   2   30.40    0.81
   1  -3   2   29.88    0.81
  -1  -3  -2   28.95    0.88
  -1  -3  -2   29.39    0.85
   1   3   2   29.21    0.85
   1   3   2   30.59    0.88
  -1   3  -2   29.53    0.83
  -2  -3  -2   12.12    0.41
   2  -3   2   11.95    0.36
   2  -3   2   11.90    0.35
   2  -3   2   11.94    0.45
   2   3   2   12.72    0.43
   2   3   2   12.23    0.44
  -2   3  -2   12.54    0.40
  -2   3  -2   12.09    0.38
  -3  -3  -2    0.60    0.13
   3  -3   2    0.82    0.12
   3  -3   2    0.65    0.08
  -3  -3  -2    0.58    0.11
   3  -3   2    0.81    0.16
  -3   3  -2    0.57    0.11
   3   3   2    0.72    0.13
  -3   3  -2    0.63    0.10
   3   3   2    0.76    0.13
   4  -3   2    4.33    0.34
  -4  -3  -2    4.06    0.32
   4  -3   2    3.88    0.20
  -4  -3  -2    3.92    0.27
  -4  -3  -2    4.09    0.30
   4  -3   2    4.12    0.19
  -4   3  -2    3.61    0.26
   4   3   2    4.13    0.29
  -4   3  -2    3.86    0.25
   4   3   2    3.98    0.28
   5  -3   2    0.47    0.12
   5  -3   2    0.50    0.11
  -5  -3  -2    0.59    0.18
  -5  -3  -2    0.44    0.19
   5  -3   2    0.31    0.20
  -5  -3  -2    0.45    0.17
  -5   3  -2    0.27    0.15
  -5   3  -2    0.43    0.16
   5   3   2    0.49    0.16
   5   3   2    0.59    0.17
   6  -3   2    0.32    0.12
   6  -3   2    0.33    0.14
  -6  -3  -2    0.27    0.24
  -6  -3  -2   -0.15    0.28
  -6  -3  -2    0.33    0.21
   6  -3   2    0.23    0.26
  -6   3  -2    0.01    0.18
   6   3   2    0.10    0.18
   6   3   2    0.01    0.19
  -6   3  -2   -0.11    0.31
   7  -3   2    0.35    0.17
  -7  -3  -2    0.60    0.25
  -7  -3  -2    0.39    0.26
   7  -3   2    0.21    0.14
  -7  -3  -2    0.20    0.26
   7  -3   2   -0.30    0.32
   7   3   2    0.04    0.21
  -7   3  -2    0.12    0.22
  -7   3  -2    0.54    0.41
   7   3   2    0.63    0.41
   8  -3   2    5.24    0.71
  -8  -3  -2    4.13    0.53
   8  -3   2    5.01    0.34
  -8  -3  -2    5.45    0.64
   8  -3   2    4.25    0.38
  -8   3  -2    4.33    0.50
   8   3   2    4.81    0.51
   8   3   2    4.24    0.48
  -8   3  -2    5.26    0.57
   9  -3   2    0.04    0.25
  -9  -3  -2    0.19    0.33
   9  -3   2    0.65    0.20
   9   3   2    0.21    0.32
  -9   3  -2    0.54    0.43
   9   3   2    0.44    0.34
  -9   3  -2    0.70    0.33
  10  -3   2    0.05    0.39
 -10  -3  -2    1.04    0.46
  10  -3   2    0.64    0.24
  10   3   2    0.96    0.41
  10   3   2    0.25    0.43
 -10   3  -2    1.01    0.41
 -11  -3  -2    1.05    0.57
 -11   3  -2    0.46    0.52
  11   3   2    0.21    0.48
 -11  -4   2    0.19    0.53
  11  -4  -2   -0.53    0.34
 -11   4   2    1.26    0.50
  11   4  -2    0.87    0.50
  10  -4  -2    0.89    0.43
  10  -4  -2    0.65    0.31
 -10  -4   2    1.04    0.42
  10   4  -2    0.78    0.40
 -10   4   2    1.44    0.41
   9  -4  -2   -0.14    0.34
  -9  -4   2   -0.16    0.33
   9  -4  -2    0.05    0.24
   9   4  -2   -0.12    0.42
  -9   4   2    0.23    0.30
   9   4  -2    0.13    0.33
  -9   4   2    0.48    0.50
  -8  -4   2    1.00    0.32
   8  -4  -2    1.40    0.47
  -8  -4   2    1.02    0.32
   8  -4  -2    1.23    0.46
   8  -4  -2    1.05    0.23
  -8   4   2    0.88    0.36
  -8   4   2    0.96    0.31
   8   4  -2    0.70    0.32
   7  -4  -2    2.48    0.43
   7  -4  -2    2.50    0.32
   7  -4  -2    2.13    0.31
  -7  -4   2    2.36    0.37
  -7  -4   2    2.80    0.35
   7   4  -2    2.10    0.32
  -7   4   2    2.86    0.37
   7   4  -2    2.94    0.37
  -7   4   2    2.98    0.36
  -6  -4   2    1.90    0.29
   6  -4  -2    1.87    0.27
  -6  -4   2    1.97    0.28
   6  -4  -2    1.91    0.27
  -6   4   2    2.08    0.29
   6   4  -2    2.49    0.39
  -6   4   2    1.60    0.27
   6   4  -2    2.13    0.30
   5  -4  -2    0.47    0.14
  -5  -4   2    0.11    0.17
  -5  -4   2    0.49    0.16
   5  -4  -2    0.39    0.17
  -5   4   2    0.32    0.18
   5   4  -2    0.38    0.18
   5   4  -2    0.24    0.16
   4  -4  -2    0.31    0.11
  -4  -4   2    0.25    0.12
   4  -4  -2    0.70    0.16
  -4  -4   2    0.24    0.16
  -4  -4   2    0.27    0.13
  -4   4   2    0.18    0.13
   4   4  -2    0.36    0.15
   4   4  -2    0.41    0.14
  -4   4   2    0.28    0.14
   3  -4  -2   14.89    0.54
  -3  -4   2   15.42    0.51
   3  -4  -2   15.28    0.52
  -3  -4   2   14.33    0.57
  -3  -4   2   15.62    0.52
  -3   4   2   15.11    0.54
  -3   4   2   14.87    0.54
   3   4  -2   14.67    0.57
   2  -4  -2    4.85    0.25
  -2  -4   2    5.26    0.28
  -2  -4   2    4.91    0.23
   2  -4  -2    4.28    0.26
  -2   4   2    4.93    0.25
  -2   4   2    5.23    0.26
   2   4  -2    4.99    0.28
   2   4  -2    5.27    0.26
  -1  -4   2   37.34    1.09
   1  -4  -2   37.27    1.08
   1  -4  -2   37.48    1.07
  -1  -4   2   36.21    1.04
  -1   4   2   37.59    1.09
   1   4  -2   37.41    1.06
   1   4  -2   38.34    1.10
  -1   4   2   38.63    1.07
   0  -4   2    6.45    0.26
   0  -4   2    5.99    0.22
   0  -4  -2    6.03    0.25
   0   4  -2    6.34    0.26
   0   4   2    6.11    0.27
   0   4   2    6.20    0.25
   0   4  -2    6.34    0.23
  -1  -4  -2    4.66    0.26
   1  -4   2    4.83    0.20
  -1  -4  -2    4.77    0.23
   1  -4   2    5.03    0.21
  -1   4  -2    5.00    0.20
  -1   4  -2    4.97    0.21
   1   4   2    5.25    0.23
  -2  -4  -2    2.12    0.20
  -2  -4  -2    2.25    0.17
   2  -4   2    2.19    0.13
  -2   4  -2    2.05    0.14
   2   4   2    2.22    0.20
   2   4   2    2.05    0.19
  -2   4  -2    2.02    0.16
   3  -4   2    5.37    0.22
   3  -4   2    5.54    0.21
  -3  -4  -2    5.45    0.33
   3  -4   2    5.45    0.34
  -3  -4  -2    5.63    0.29
  -3   4  -2    5.55    0.28
   3   4   2    5.87    0.31
   3   4   2    5.68    0.31
  -3   4  -2    5.85    0.26
  -4  -4  -2    6.08    0.34
   4  -4   2    6.14    0.40
  -4  -4  -2    5.91    0.37
  -4  -4  -2    6.06    0.37
   4  -4   2    6.28    0.24
   4  -4   2    5.99    0.26
  -4   4  -2    6.16    0.32
   4   4   2    5.80    0.35
  -4   4  -2    5.94    0.33
   4   4   2    6.53    0.36
  -5  -4  -2    0.01    0.18
   5  -4   2    0.07    0.09
   5  -4   2    0.11    0.10
   5  -4   2   -0.03    0.22
  -5  -4  -2    0.12    0.18
  -5  -4  -2    0.23    0.16
   5   4   2    0.29    0.17
  -5   4  -2    0.10    0.15
  -5   4  -2    0.22    0.17
   5   4   2    0.35    0.17
  -6  -4  -2    3.69    0.43
  -6  -4  -2    3.73    0.42
   6  -4   2    4.25    0.27
  -6  -4  -2    3.28    0.39
   6  -4   2    4.44    0.49
   6  -4   2    4.30    0.24
   6   4   2    4.16    0.39
  -6   4  -2    3.60    0.38
   6   4   2    4.25    0.40
  -6   4  -2    4.06    0.38
  -7  -4  -2   10.40    0.68
  -7  -4  -2   11.43    0.69
   7  -4   2   10.80    0.72
  -7  -4  -2   12.04    0.63
   7  -4   2   12.28    0.45
   7  -4   2   12.05    0.48
  -7   4  -2   13.40    0.64
  -7   4  -2   12.03    0.78
   7   4   2   11.28    0.63
   7   4   2   12.48    0.87
  -8  -4  -2    0.28    0.31
   8  -4   2    0.13    0.19
   8  -4   2    0.38    0.41
  -8  -4  -2   -0.01    0.33
   8  -4   2    0.16    0.15
  -8   4  -2    0.55    0.29
   8   4   2    0.30    0.28
   8   4   2    0.09    0.25
  -8   4  -2    0.54    0.33
  -9  -4  -2    4.98    0.66
   9  -4   2    4.87    0.35
  -9   4  -2    5.25    0.63
   9   4   2    4.34    0.50
  -9   4  -2    5.13    0.58
   9   4   2    5.38    0.62
  10  -4   2    0.24    0.21
 -10  -4  -2    0.44    0.43
  10   4   2    0.30    0.42
 -10   4  -2    0.46    0.42
 -11  -4  -2    0.38    0.58
  11   4   2    0.78    0.52
 -11   4  -2    1.35    0.53
 -11  -5   2    2.31    0.64
  11  -5  -2    3.60    0.63
  11   5  -2    3.16    0.62
 -11   5   2    3.61    0.58
 -10  -5   2    3.75    0.58
  10  -5  -2    3.64    0.50
  10  -5  -2    3.04    0.51
  10   5  -2    2.53    0.51
 -10   5   2    3.44    0.51
  -9  -5   2    0.40    0.35
   9  -5  -2    0.09    0.25
   9  -5  -2    0.32    0.36
   9   5  -2    0.41    0.35
  -9   5   2    0.55    0.34
  -8  -5   2    2.19    0.41
  -8  -5   2    2.49    0.40
   8  -5  -2    2.72    0.47
   8  -5  -2    2.02    0.28
   8  -5  -2    1.73    0.49
   8   5  -2    2.18    0.38
  -8   5   2    2.09    0.42
   8   5  -2    2.28    0.45
   7  -5  -2    2.66    0.32
  -7  -5   2    1.81    0.30
   7  -5  -2    2.73    0.40
  -7  -5   2    2.87    0.40
   7  -5  -2    2.56    0.44
  -7   5   2    2.08    0.33
  -7   5   2    3.11    0.40
   7   5  -2    2.64    0.37
   7   5  -2    2.40    0.37
   6  -5  -2    0.32    0.16
  -6  -5   2    0.26    0.22
   6  -5  -2    0.62    0.26
  -6  -5   2    0.20    0.23
  -6   5   2    0.24    0.21
  -6   5   2    0.61    0.40
   6   5  -2    0.39    0.24
   6   5  -2    0.10    0.21
   5  -5  -2   10.50    0.46
  -5  -5   2   10.22    0.49
   5  -5  -2   11.76    0.52
  -5  -5   2   10.47    0.51
  -5  -5   2   10.38    0.57
  -5   5   2   11.47    0.53
   5   5  -2   11.02    0.56
   5   5  -2    9.50    0.52
  -5   5   2   10.90    0.53
  -4  -5   2   11.42    0.53
  -4  -5   2   10.95    0.51
   4  -5  -2   10.94    0.44
   4  -5  -2   11.14    0.48
  -4  -5   2   11.19    0.46
   4   5  -2   10.53    0.58
   4   5  -2   10.36    0.49
  -4   5   2   10.45    0.48
  -4   5   2   10.49    0.47
  -3  -5   2    1.05    0.14
  -3  -5   2    0.94    0.17
   3  -5  -2    1.07    0.14
  -3  -5   2    1.00    0.13
   3  -5  -2    1.20    0.17
  -3   5   2    1.05    0.16
  -3   5   2    0.82    0.16
   3   5  -2    1.03    0.17
   3   5  -2    0.95    0.15
  -2  -5   2    5.62    0.31
   2  -5  -2    5.15    0.29
  -2  -5   2    5.31    0.25
   2  -5  -2    5.21    0.27
   2   5  -2    5.51    0.31
  -2   5   2    5.43    0.28
  -2   5   2    5.70    0.27
   2   5  -2    5.37    0.27
  -1  -5   2   13.40    0.49
  -1  -5   2   13.61    0.44
   1  -5  -2   13.43    0.48
   1  -5  -2   13.32    0.46
   1   5  -2   13.82    0.49
   1   5  -2   13.41    0.44
  -1   5   2   13.19    0.47
  -1   5   2   12.28    0.46
   0  -5  -2    9.96    0.40
   0  -5   2    9.75    0.34
   0  -5  -2    9.62    0.37
   0  -5   2    9.99    0.37
   0   5  -2   10.32    0.35
   0   5   2   10.17    0.40
   0   5  -2    9.83    0.37
   0   5   2   10.58    0.37
  -1  -5  -2    4.35    0.27
  -1  -5  -2    4.18    0.23
   1  -5   2    4.45    0.21
   1  -5   2    4.07    0.20
   1   5   2    4.23    0.25
   1   5   2    4.19    0.23
  -1   5  -2    4.75    0.21
  -1   5  -2    4.19    0.21
   2  -5   2    0.04    0.06
  -2  -5  -2    0.03    0.09
   2  -5   2   -0.09    0.08
  -2  -5  -2    0.07    0.09
  -2   5  -2    0.09    0.08
   2   5   2    0.08    0.09
   2   5   2   -0.02    0.11
  -2   5  -2    0.01    0.09
   3  -5   2   23.28    0.67
   3  -5   2   22.34    0.68
  -3  -5  -2   23.12    0.81
  -3  -5  -2   21.93    0.73
  -3   5  -2   22.81    0.72
   3   5   2   21.65    0.76
  -3   5  -2   23.52    0.73
   3   5   2   23.93    0.79
   4  -5   2    2.88    0.34
  -4  -5  -2    2.40    0.25
   4  -5   2    1.90    0.15
   4  -5   2    2.33    0.18
  -4  -5  -2    2.23    0.31
   4   5   2    2.73    0.29
  -4   5  -2    2.25    0.23
   4   5   2    1.99    0.28
  -4   5  -2    2.24    0.25
  -5  -5  -2    2.29    0.29
   5  -5   2    1.99    0.20
  -5  -5  -2    2.54    0.32
   5  -5   2    2.38    0.17
   5  -5   2    2.82    0.37
   5   5   2    2.81    0.33
  -5   5  -2    2.22    0.31
   5   5   2    2.57    0.32
  -5   5  -2    2.13    0.28
   6  -5   2    0.54    0.28
   6  -5   2    0.18    0.12
  -6  -5  -2    0.35    0.22
   6  -5   2    0.19    0.10
  -6  -5  -2    0.19    0.23
  -6  -5  -2   -0.05    0.19
  -6   5  -2    0.19    0.20
   6   5   2   -0.05    0.21
  -6   5  -2   -0.30    0.20
   6   5   2   -0.01    0.21
  -7  -5  -2    0.14    0.41
  -7  -5  -2    0.51    0.26
   7  -5   2    0.39    0.13
   7  -5   2    0.08    0.37
   7  -5   2    0.42    0.16
  -7  -5  -2    0.47    0.30
  -7   5  -2    0.35    0.24
   7   5   2    0.43    0.26
  -7   5  -2   -0.10    0.25
   7   5   2    0.36    0.26
   8  -5   2    0.85    0.48
  -8  -5  -2    0.90    0.41
   8  -5   2    0.76    0.16
   8  -5   2    0.55    0.19
  -8  -5  -2    0.70    0.32
  -8  -5  -2    0.35    0.36
  -8   5  -2    0.65    0.29
  -8   5  -2    1.02    0.37
   8   5   2    0.40    0.36
   8   5   2    0.64    0.33
   9  -5   2    0.29    0.17
  -9  -5  -2   -0.09    0.35
   9  -5   2   -0.06    0.20
  -9   5  -2    0.40    0.34
  -9   5  -2   -0.04    0.45
   9   5   2    0.31    0.40
   9   5   2    0.55    0.36
 -10  -5  -2    0.36    0.48
  10   5   2    0.11    0.43
 -10   5  -2   -0.12    0.39
 -11  -5  -2    0.99    0.63
 -11   5  -2    1.68    0.53
  11   5   2    0.63    0.55
 -11  -6   2    2.55    0.79
  11  -6  -2    1.40    0.58
  11   6  -2    2.53    0.62
 -11   6   2    2.91    0.61
 -10  -6   2   -0.41    0.49
  10  -6  -2   -0.34    0.57
  10  -6  -2    0.86    0.32
  10   6  -2    1.29    0.48
 -10   6   2    0.16    0.41
   9  -6  -2    2.00    0.41
  -9  -6   2    1.17    0.43
   9  -6  -2    1.09    0.28
  -9   6   2    0.57    0.35
   9   6  -2    1.62    0.42
   8  -6  -2    3.50    0.38
   8  -6  -2    4.70    0.57
  -8  -6   2    2.90    0.45
  -8   6   2    3.88    0.53
  -8   6   2    3.22    0.49
   8   6  -2    4.21    0.51
   8   6  -2    3.68    0.48
  -7  -6   2    2.42    0.32
   7  -6  -2    2.83    0.41
   7  -6  -2    2.93    0.34
  -7  -6   2    1.93    0.42
   7   6  -2    2.93    0.43
  -7   6   2    2.74    0.36
   7   6  -2    2.01    0.60
  -7   6   2    3.05    0.40
   6  -6  -2    0.38    0.16
   6  -6  -2   -0.04    0.28
  -6  -6   2   -0.10    0.23
  -6  -6   2    0.35    0.21
   6   6  -2    0.18    0.22
   6   6  -2   -0.17    0.24
  -6   6   2    0.35    0.23
  -6   6   2   -0.20    0.19
   5  -6  -2    3.98    0.30
   5  -6  -2    3.87    0.36
  -5  -6   2    3.85    0.33
  -5  -6   2    3.43    0.41
  -5  -6   2    3.71    0.43
  -5   6   2    3.24    0.36
   5   6  -2    3.82    0.39
  -5   6   2    2.85    0.36
   5   6  -2    4.04    0.41
   4  -6  -2    0.46    0.14
  -4  -6   2    0.81    0.22
  -4  -6   2    0.48    0.15
   4  -6  -2    0.57    0.18
  -4  -6   2    0.50    0.14
  -4   6   2    0.49    0.17
   4   6  -2    0.70    0.20
  -4   6   2    0.39    0.17
   4   6  -2    0.37    0.18
  -3  -6   2   -0.01    0.10
   3  -6  -2    0.01    0.10
   3  -6  -2    0.08    0.14
  -3  -6   2    0.23    0.11
  -3  -6   2   -0.07    0.12
   3   6  -2    0.45    0.29
  -3   6   2    0.04    0.13
   3   6  -2   -0.12    0.12
  -3   6   2    0.06    0.13
  -2  -6   2    1.42    0.17
  -2  -6   2    1.34    0.20
   2  -6  -2    1.13    0.16
   2  -6  -2    1.35    0.18
   2   6  -2    1.30    0.18
  -2   6   2    1.36    0.17
   2   6  -2    1.48    0.20
  -2   6   2    1.42    0.19
   1  -6  -2   45.71    1.35
   1  -6  -2   46.00    1.32
  -1  -6   2   45.47    1.30
  -1  -6   2   47.44    1.36
  -1   6   2   46.06    1.32
   1   6  -2   46.78    1.36
   1   6  -2   43.11    1.30
  -1   6   2   46.00    1.35
   0  -6   2   17.49    0.53
   0  -6  -2   15.57    0.55
   0  -6  -2   17.22    0.61
   0  -6   2   16.94    0.57
   0   6  -2   16.23    0.57
   0   6   2   16.94    0.56
   0   6  -2   16.29    0.53
   0   6   2   16.98    0.60
   1  -6   2   18.05    0.58
   1  -6   2   17.78    0.56
  -1  -6  -2   18.07    0.65
   1   6   2   17.55    0.63
  -1   6  -2   17.71    0.59
   1   6   2   17.70    0.60
  -1   6  -2   18.66    0.58
   2  -6   2    9.17    0.35
  -2  -6  -2    8.98    0.44
  -2  -6  -2    9.39    0.38
   2  -6   2    9.22    0.34
  -2   6  -2    9.00    0.37
  -2   6  -2    9.77    0.36
   2   6   2    9.93    0.41
   2   6   2    8.99    0.43
  -3  -6  -2   18.96    0.73
  -3  -6  -2   19.19    0.65
   3  -6   2   18.33    0.59
   3  -6   2   19.47    0.59
   3   6   2   17.47    0.68
  -3   6  -2   19.33    0.64
  -3   6  -2   19.16    0.64
   3   6   2   19.86    0.72
  -4  -6  -2    3.44    0.29
  -4  -6  -2    3.65    0.37
   4  -6   2    3.61    0.19
   4  -6   2    3.25    0.22
   4  -6   2    4.04    0.59
   4   6   2    3.11    0.34
  -4   6  -2    3.01    0.29
   4   6   2    3.09    0.34
  -4   6  -2    3.23    0.27
  -5  -6  -2   -0.13    0.18
  -5  -6  -2    0.24    0.16
   5  -6   2    0.11    0.09
   5  -6   2    0.09    0.11
   5  -6   2    0.07    0.29
  -5  -6  -2   -0.09    0.20
  -5   6  -2   -0.09    0.18
   5   6   2    0.19    0.21
  -5   6  -2    0.07    0.27
   5   6   2    0.24    0.20
   6  -6   2    0.25    0.10
  -6  -6  -2    0.40    0.25
   6  -6   2   -0.12    0.29
   6  -6   2    0.40    0.13
  -6  -6  -2    0.05    0.21
  -6  -6  -2    0.57    0.25
   6   6   2    0.24    0.21
  -6   6  -2    0.34    0.21
   6   6   2    0.38    0.25
  -6   6  -2    0.18    0.22
   7  -6   2    0.64    0.37
  -7  -6  -2    0.25    0.29
  -7  -6  -2    0.04    0.28
   7  -6   2    0.03    0.14
  -7  -6  -2   -0.51    0.22
   7  -6   2   -0.12    0.11
  -7   6  -2    0.43    0.28
   7   6   2   -0.18    0.31
  -7   6  -2   -0.01    0.22
   7   6   2    0.35    0.29
   8  -6   2    1.79    0.21
   8  -6   2    2.15    0.26
  -8  -6  -2    1.95    0.42
  -8  -6  -2    2.05    0.43
  -8   6  -2    2.69    0.45
  -8   6  -2    2.19    0.37
   8   6   2    2.32    0.41
   8   6   2    2.53    0.43
  -9  -6  -2   -0.14    0.40
  -9   6  -2    0.80    0.34
   9   6   2    0.20    0.37
 -10  -6  -2    0.41    0.53
 -10   6  -2   -0.41    0.40
  10   6   2    0.16    0.45
  10  -7  -2    0.44    0.32
 -10  -7   2    0.21    0.51
 -10   7   2    0.81    0.41
  10   7  -2   -0.53    0.48
   9  -7  -2    0.40    0.26
  -9  -7   2    0.76    0.43
   9  -7  -2    0.31    0.39
  -9   7   2    0.11    0.33
   9   7  -2    0.35    0.41
  -8  -7   2    4.82    0.66
   8  -7  -2    4.59    0.41
  -8   7   2    5.35    0.54
   8   7  -2    4.31    0.52
  -8   7   2    4.56    0.58
   7  -7  -2    0.41    0.27
   7  -7  -2    0.26    0.19
  -7  -7   2   -0.09    0.30
  -7  -7   2    0.19    0.26
  -7   7   2   -0.23    0.23
   7   7  -2    0.68    0.36
  -7   7   2    0.61    0.34
   7   7  -2    0.34    0.29
  -6  -7   2    1.71    0.34
   6  -7  -2    1.30    0.21
   6  -7  -2    0.92    0.27
  -6  -7   2    1.30    0.27
  -6  -7   2    0.87    0.23
   6   7  -2    1.57    0.33
  -6   7   2    1.31    0.30
   6   7  -2    1.41    0.31
  -6   7   2    1.48    0.27
   5  -7  -2    3.72    0.32
   5  -7  -2    3.33    0.42
  -5  -7   2    3.19    0.43
  -5  -7   2    3.65    0.35
  -5  -7   2    3.46    0.34
   5   7  -2    3.78    0.45
   5   7  -2    3.78    0.40
  -5   7   2    3.97    0.40
  -5   7   2    4.10    0.38
  -4  -7   2    0.10    0.14
   4  -7  -2   -0.03    0.17
   4  -7  -2    0.02    0.12
  -4  -7   2    0.22    0.15
  -4  -7   2    0.21    0.21
   4   7  -2    0.33    0.20
  -4   7   2    0.25    0.17
  -4   7   2    0.18    0.17
   4   7  -2    0.20    0.17
   3  -7  -2    1.88    0.23
   3  -7  -2    1.63    0.22
  -3  -7   2    1.49    0.20
  -3  -7   2    1.45    0.23
  -3   7   2    1.76    0.25
   3   7  -2    1.53    0.21
   3   7  -2    1.47    0.25
  -3   7   2    1.79    0.23
   2  -7  -2    7.29    0.37
  -2  -7   2    7.60    0.34
  -2  -7   2    7.36    0.41
   2  -7  -2    7.25    0.38
   2   7  -2    7.13    0.36
   2   7  -2    6.65    0.62
  -2   7   2    7.60    0.37
  -1  -7   2    0.66    0.16
   1  -7  -2    0.98    0.16
   1  -7  -2    0.61    0.15
  -1  -7   2    0.78    0.13
   1   7  -2    0.71    0.13
   1   7  -2    0.82    0.17
  -1   7   2    0.66    0.15
  -1   7   2    0.81    0.15
   0  -7  -2    3.88    0.26
   0  -7  -2    3.72    0.29
   0  -7   2    3.94    0.23
   0  -7   2    3.85    0.27
   0   7  -2    3.97    0.27
   0   7   2    3.97    0.26
   0   7  -2    4.17    0.24
   0   7   2    3.51    0.33
   1  -7   2    1.54    0.16
  -1  -7  -2    1.34    0.19
   1  -7   2    1.40    0.19
  -1  -7  -2    1.61    0.22
   1   7   2    1.62    0.21
  -1   7  -2    1.13    0.16
   1   7   2    1.48    0.20
  -2  -7  -2    5.55    0.37
   2  -7   2    5.48    0.28
  -2  -7  -2    5.64    0.33
   2  -7   2    5.64    0.29
   2   7   2    5.74    0.33
  -2   7  -2    5.37    0.29
   2   7   2    5.91    0.37
  -2   7  -2    5.84    0.31
  -3  -7  -2   -0.04    0.13
  -3  -7  -2    0.05    0.16
   3  -7   2    0.12    0.09
   3  -7   2   -0.05    0.11
  -3   7  -2    0.03    0.13
   3   7   2    0.38    0.17
   3   7   2    0.13    0.17
  -3   7  -2    0.13    0.12
   4  -7   2    0.03    0.10
  -4  -7  -2    0.04    0.15
   4  -7   2    0.14    0.11
  -4  -7  -2    0.06    0.20
   4   7   2   -0.03    0.18
   4   7   2    0.13    0.18
  -4   7  -2    0.14    0.16
  -4   7  -2    0.04    0.15
   5  -7   2    3.81    0.22
   5  -7   2    3.27    0.48
   5  -7   2    3.57    0.24
  -5  -7  -2    3.27    0.40
  -5  -7  -2    3.51    0.35
  -5  -7  -2    5.17    0.48
   5   7   2    3.87    0.42
  -5   7  -2    3.40    0.34
   5   7   2    3.69    0.43
  -5   7  -2    3.56    0.37
   6  -7   2    2.56    0.46
   6  -7   2    2.93    0.20
   6  -7   2    2.74    0.23
  -6  -7  -2    2.86    0.38
  -6  -7  -2    2.65    0.38
   6   7   2    3.30    0.47
  -6   7  -2    3.48    0.37
   6   7   2    2.61    0.36
  -6   7  -2    2.84    0.36
   7  -7   2   11.74    0.85
  -7  -7  -2   13.00    0.76
  -7  -7  -2   11.55    0.76
  -7  -7  -2   10.63    0.71
  -7   7  -2   11.02    0.70
  -7   7  -2   12.16    0.64
   7   7   2   11.40    0.74
   7   7   2   10.26    0.69
  -8  -7  -2    1.82    0.42
  -8  -7  -2    1.22    0.42
  -8   7  -2    0.71    0.42
  -8   7  -2    1.78    0.42
   8   7   2    1.35    0.39
  -9  -7  -2    0.42    0.46
  -9   7  -2    0.28    0.37
   9   7   2   -0.03    0.42
 -10  -7  -2    0.56    0.53
  10   7   2    0.62    0.51
 -10   7  -2    0.26    0.44
 -10  -8   2    0.14    0.58
  10  -8  -2    0.77    0.36
 -10   8   2    1.16    0.42
  10   8  -2    1.55    0.59
   9  -8  -2    0.48    0.29
  -9  -8   2    0.47    0.46
   9  -8  -2    0.95    0.45
   9   8  -2    0.11    0.45
  -9   8   2    0.30    0.34
   8  -8  -2    0.20    0.23
  -8  -8   2    0.79    0.39
   8   8  -2    0.19    0.36
  -8   8   2    0.08    0.28
  -7  -8   2   -0.18    0.40
   7  -8  -2    0.48    0.21
  -7  -8   2    0.19    0.32
   7  -8  -2    0.71    0.30
   7   8  -2    0.32    0.31
  -7   8   2    0.84    0.39
  -7   8   2    0.57    0.28
  -6  -8   2    1.44    0.29
   6  -8  -2    1.84    0.25
  -6  -8   2    1.70    0.39
  -6  -8   2    1.57    0.29
   6  -8  -2    2.07    0.32
  -6   8   2    1.77    0.28
   6   8  -2    1.87    0.34
   6   8  -2    2.01    0.37
  -6   8   2    2.12    0.35
   5  -8  -2    9.65    0.47
  -5  -8   2    9.27    0.50
  -5  -8   2   10.20    0.51
   5  -8  -2   10.66    0.56
  -5  -8   2    9.84    0.62
  -5   8   2    9.90    0.58
   5   8  -2    9.78    0.59
  -5   8   2   10.43    0.53
   5   8  -2    9.08    0.63
  -4  -8   2    2.19    0.27
  -4  -8   2    2.33    0.30
  -4  -8   2    1.90    0.31
   4  -8  -2    2.52    0.29
  -4   8   2    2.58    0.35
   4   8  -2    1.98    0.30
   4   8  -2    2.33    0.30
  -4   8   2    1.60    0.23
  -3  -8   2    2.29    0.27
   3  -8  -2    2.16    0.28
  -3  -8   2    1.92    0.29
   3  -8  -2    2.08    0.30
   3   8  -2    2.27    0.30
  -3   8   2    2.12    0.29
  -3   8   2    2.55    0.31
   3   8  -2    2.32    0.31
   2  -8  -2    1.44    0.22
  -2  -8   2    1.19    0.22
   2  -8  -2    1.10    0.20
  -2   8   2    1.25    0.20
   2   8  -2    1.37    0.19
  -2   8   2    0.97    0.19
   2   8  -2    1.47    0.24
   1  -8  -2    0.38    0.15
  -1  -8   2    0.23    0.16
  -1  -8   2    0.27    0.13
  -1   8   2    0.67    0.17
  -1   8   2    0.49    0.17
   1   8  -2    0.52    0.13
   1   8  -2    0.72    0.17
   0  -8   2   -0.02    0.11
   0  -8   2    0.12    0.14
   0  -8  -2    0.06    0.13
   0  -8  -2    0.03    0.14
   0   8  -2    0.12    0.11
   0   8   2   -0.01    0.11
   0   8   2    0.03    0.16
  -1  -8  -2    5.87    0.40
   1  -8   2    5.50    0.33
   1  -8   2    5.68    0.32
  -1  -8  -2    6.04    0.35
   1   8   2    5.51    0.38
   1   8   2    6.17    0.35
  -1   8  -2    6.19    0.34
  -1   8  -2    6.33    0.32
  -2  -8  -2    0.61    0.21
   2  -8   2    0.83    0.15
  -2  -8  -2    0.90    0.18
   2  -8   2    0.79    0.15
  -2   8  -2    0.89    0.17
   2   8   2    0.80    0.18
  -2   8  -2    0.73    0.16
  -3  -8  -2    0.87    0.20
   3  -8   2    1.04    0.15
   3  -8   2    1.16    0.17
  -3  -8  -2    1.14    0.24
   3   8   2    1.13    0.23
  -3   8  -2    0.83    0.24
  -3   8  -2    0.91    0.17
  -4  -8  -2    0.81    0.27
   4  -8   2    0.98    0.14
  -4  -8  -2    1.00    0.22
   4  -8   2    0.92    0.15
  -4   8  -2    0.99    0.19
  -4   8  -2    0.79    0.21
   4   8   2    0.89    0.24
   5  -8   2    0.54    0.32
   5  -8   2    0.71    0.14
   5  -8   2    0.46    0.12
  -5  -8  -2    0.68    0.25
  -5  -8  -2    0.49    0.27
  -5  -8  -2    0.31    0.21
  -5   8  -2    0.58    0.19
  -5   8  -2    0.80    0.39
   5   8   2    0.24    0.23
   5   8   2    0.37    0.25
  -6  -8  -2    3.90    0.43
  -6  -8  -2    4.58    0.56
   6  -8   2    4.07    0.53
  -6  -8  -2    3.89    0.48
   6   8   2    3.80    0.50
   6   8   2    3.53    0.44
  -6   8  -2    3.96    0.40
  -6   8  -2    3.33    0.47
   7  -8   2    2.42    0.53
  -7  -8  -2    3.44    0.50
  -7  -8  -2    2.69    0.43
  -7   8  -2    3.13    0.45
   7   8   2    2.80    0.41
  -7   8  -2    3.37    0.42
  -8  -8  -2    0.30    0.37
  -8  -8  -2   -0.37    0.38
  -8   8  -2    0.36    0.29
   8   8   2    0.06    0.37
  -8   8  -2    1.45    0.46
  -9  -8  -2    2.37    0.56
   9   8   2    2.22    0.51
  -9   8  -2    2.62    0.42
  10   8   2    1.47    0.58
 -10   8  -2    1.12    0.47
  10   9  -2    1.32    0.72
 -10   9   2    0.83    0.47
  -9  -9   2   -0.07    0.53
   9  -9  -2   -0.53    0.30
   9   9  -2   -0.26    0.50
  -9   9   2    0.06    0.35
  -8  -9   2    5.72    0.77
   8  -9  -2    6.09    0.50
  -8   9   2    6.71    0.59
   8   9  -2    6.23    0.74
  -7  -9   2    0.36    0.35
   7  -9  -2    0.53    0.24
   7  -9  -2    1.04    0.35
  -7   9   2    0.73    0.28
   7   9  -2    0.70    0.33
  -6  -9   2    2.14    0.34
   6  -9  -2    1.64    0.27
  -6  -9   2    1.47    0.37
  -6  -9   2    1.61    0.31
   6  -9  -2    2.01    0.33
   6   9  -2    1.85    0.50
  -6   9   2    1.61    0.35
  -6   9   2    1.91    0.41
   6   9  -2    2.04    0.35
   5  -9  -2    0.50    0.19
  -5  -9   2    0.22    0.20
  -5  -9   2   -0.05    0.20
   5  -9  -2    0.02    0.25
  -5  -9   2    0.31    0.28
  -5   9   2    0.08    0.19
   5   9  -2    0.09    0.27
   5   9  -2   -0.05    0.23
  -5   9   2    0.34    0.27
  -4  -9   2    4.33    0.49
  -4  -9   2    3.72    0.35
   4  -9  -2    3.66    0.35
   4  -9  -2    4.48    0.42
  -4  -9   2    4.50    0.33
  -4   9   2    4.02    0.42
  -4   9   2    4.50    0.37
   4   9  -2    5.44    0.44
   4   9  -2    3.96    0.47
   3  -9  -2   21.73    0.80
   3  -9  -2   21.77    0.80
  -3  -9   2   19.94    0.98
  -3  -9   2   21.39    0.87
  -3   9   2   22.09    0.79
  -3   9   2   20.78    0.83
   3   9  -2   21.93    0.87
   3   9  -2   21.70    0.83
  -2  -9   2    2.14    0.29
   2  -9  -2    2.67    0.31
   2  -9  -2    2.33    0.33
  -2  -9   2    2.28    0.29
   2   9  -2    2.68    0.37
   2   9  -2    2.79    0.31
  -2   9   2    3.23    0.35
  -1  -9   2    5.92    0.38
   1  -9  -2    6.50    0.39
  -1  -9   2    6.43    0.42
   1  -9  -2    6.11    0.41
   1   9  -2    6.93    0.51
  -1   9   2    6.28    0.41
   1   9  -2    6.69    0.37
  -1   9   2    6.40    0.37
   0  -9   2    0.19    0.14
   0  -9  -2    0.15    0.17
   0  -9   2   -0.12    0.15
   0  -9  -2    0.21    0.15
   0   9  -2    0.04    0.13
   0   9   2    0.19    0.14
   0   9   2    0.32    0.17
   0   9  -2    0.14    0.16
   1  -9   2    0.20    0.15
  -1  -9  -2    0.29    0.19
   1  -9   2    0.13    0.15
   1   9   2    0.31    0.20
  -1   9  -2   -0.11    0.15
   1   9   2    0.08    0.14
  -1   9  -2    0.01    0.13
   2  -9   2    4.81    0.32
  -2  -9  -2    5.23    0.37
   2  -9   2    4.53    0.32
  -2  -9  -2    5.30    0.45
  -2   9  -2    5.27    0.34
  -2   9  -2    5.14    0.36
   2   9   2    4.06    0.41
   2   9   2    5.44    0.38
   3  -9   2    1.47    0.20
  -3  -9  -2    1.35    0.22
   3  -9   2    1.45    0.18
  -3  -9  -2    0.77    0.27
   3   9   2    1.24    0.26
  -3   9  -2    1.11    0.22
   3   9   2    0.91    0.24
  -3   9  -2    1.39    0.21
  -4  -9  -2   -0.10    0.18
   4  -9   2    0.33    0.13
   4  -9   2    0.27    0.15
  -4  -9  -2   -0.12    0.23
  -4   9  -2    0.09    0.16
   4   9   2    0.25    0.25
   4   9   2   -0.07    0.20
  -4   9  -2    0.58    0.28
   5  -9   2    3.53    0.24
   5  -9   2    2.83    0.43
  -5  -9  -2    3.09    0.40
  -5  -9  -2    4.34    0.54
   5  -9   2    3.13    0.23
   5   9   2    3.17    0.40
  -5   9  -2    2.99    0.35
   5   9   2    3.20    0.41
  -5   9  -2    3.16    0.36
  -6  -9  -2    0.04    0.32
   6  -9   2   -0.01    0.42
  -6  -9  -2    0.20    0.28
  -6   9  -2    1.20    0.34
  -6   9  -2    0.58    0.23
   6   9   2   -0.17    0.27
  -7  -9  -2    1.80    0.43
  -7   9  -2    0.40    0.28
   7   9   2    0.44    0.36
  -7   9  -2    0.54    0.40
  -8  -9  -2   -0.17    0.43
  -8  -9  -2    0.04    0.43
   8   9   2    0.53    0.41
  -8   9  -2    0.61    0.30
  -9  -9  -2   -0.08    0.55
  -9  -9  -2    0.41    0.54
  -9   9  -2    1.06    0.38
   9   9   2    1.28    0.53
  -9 -10   2    0.68    0.61
   9  10  -2   -0.40    0.55
  -9  10   2    1.36    0.41
   8 -10  -2    2.59    0.35
  -8 -10   2    3.04    0.57
  -8  10   2    2.46    0.40
   8  10  -2    2.24    0.53
  -7 -10   2    1.63    0.43
   7 -10  -2    2.28    0.31
  -7  10   2    1.48    0.32
   7  10  -2    1.46    0.41
   6 -10  -2    0.31    0.23
  -6 -10   2    0.73    0.36
   6 -10  -2    0.24    0.35
  -6 -10   2    0.44    0.28
   6  10  -2    0.07    0.29
  -6  10   2    0.68    0.41
  -6  10   2    0.33    0.24
   5 -10  -2    0.75    0.30
  -5 -10   2    0.44    0.23
   5 -10  -2    0.35    0.21
  -5 -10   2    0.53    0.22
  -5 -10   2    0.69    0.34
   5  10  -2    0.55    0.30
  -5  10   2    0.43    0.32
   5  10  -2    0.46    0.50
  -5  10   2    0.35    0.23
  -4 -10   2    1.39    0.26
  -4 -10   2    1.54    0.23
   4 -10  -2    1.81    0.30
  -4 -10   2    1.47    0.33
   4 -10  -2    1.20    0.25
  -4  10   2    2.21    0.34
  -4  10   2    1.54    0.27
   4  10  -2    2.11    0.37
   4  10  -2    1.07    0.29
   3 -10  -2    3.65    0.37
  -3 -10   2    2.33    0.35
   3 -10  -2    2.79    0.38
  -3  10   2    2.86    0.36
   3  10  -2    3.13    0.38
  -3  10   2    2.82    0.41
   3  10  -2    3.94    0.47
   2 -10  -2   18.00    0.73
   2 -10  -2   18.87    0.75
  -2 -10   2   19.58    0.76
  -2 -10   2   17.53    0.78
  -2  10   2   17.62    0.70
   2  10  -2   17.85    0.78
  -2  10   2   17.99    0.76
   2  10  -2   17.98    0.72
   1 -10  -2    2.45    0.29
  -1 -10   2    2.29    0.30
  -1 -10   2    2.40    0.29
  -1  10   2    2.12    0.29
   1  10  -2    2.34    0.31
  -1  10   2    2.01    0.28
   1  10  -2    2.08    0.29
   0 -10   2    0.03    0.15
   0 -10  -2   -0.02    0.19
   0 -10  -2   -0.16    0.16
   0 -10   2   -0.02    0.17
   0  10   2   -0.09    0.19
   0  10   2    0.14    0.16
   0  10  -2   -0.01    0.20
   0  10  -2    0.06    0.15
   1 -10   2   -0.16    0.15
   1 -10   2   -0.18    0.17
  -1 -10  -2    0.18    0.17
  -1 -10  -2    0.13    0.22
   1  10   2    0.04    0.23
  -1  10  -2    0.03    0.14
   1  10   2    0.22    0.16
  -1  10  -2    0.26    0.20
   2 -10   2    0.39    0.17
  -2 -10  -2    0.02    0.22
  -2 -10  -2    0.01    0.18
   2 -10   2    0.42    0.16
  -2  10  -2    0.08    0.19
   2  10   2    0.18    0.25
   2  10   2    0.32    0.19
  -2  10  -2    0.18    0.15
   3 -10   2    0.47    0.17
  -3 -10  -2    0.38    0.26
   3 -10   2    0.56    0.19
   3  10   2    0.45    0.26
  -3  10  -2    0.29    0.18
   3  10   2    0.22    0.27
  -4 -10  -2    6.60    0.58
   4 -10   2    5.55    0.35
  -4 -10  -2    6.46    0.48
   4 -10   2    6.12    0.33
   4  10   2    6.02    0.52
   4  10   2    5.63    0.58
  -4  10  -2    6.47    0.41
  -4  10  -2    6.44    0.49
   5 -10   2    6.29    0.72
  -5 -10  -2    7.89    0.66
  -5  10  -2    7.48    0.45
  -5  10  -2    7.04    0.58
   5  10   2    6.86    0.61
  -6 -10  -2    0.48    0.31
  -6 -10  -2    0.50    0.36
   6  10   2    0.62    0.32
  -6  10  -2    0.67    0.38
  -7 -10  -2    0.51    0.38
  -7 -10  -2    1.14    0.47
   7  10   2    0.43    0.37
  -7  10  -2    0.48    0.28
  -8 -10  -2    0.73    0.53
  -8 -10  -2   -0.59    0.44
   8  10   2    0.47    0.44
  -8  10  -2    0.23    0.30
  -9 -10  -2    0.04    0.60
   9  10   2    0.28    0.56
  -9  10  -2    0.29    0.39
   8 -11  -2    0.42    0.38
  -8 -11   2   -0.04    0.51
  -8  11   2   -0.59    0.32
   8  11  -2    0.20    0.52
  -7 -11   2   -0.79    0.43
   7 -11  -2   -0.65    0.28
  -7  11   2    0.35    0.28
   7  11  -2   -0.06    0.38
   6 -11  -2    0.58    0.29
  -6 -11   2    0.92    0.38
  -6 -11   2    0.55    0.33
   6 -11  -2    0.62    0.49
   6  11  -2    0.89    0.38
  -6  11   2    0.48    0.26
  -5 -11   2    0.04    0.23
   5 -11  -2    0.59    0.37
   5 -11  -2   -0.23    0.23
  -5 -11   2   -0.24    0.33
  -5 -11   2    0.07    0.27
   5  11  -2   -0.32    0.29
  -5  11   2    0.34    0.24
  -4 -11   2    0.29    0.24
   4 -11  -2    0.44    0.28
  -4 -11   2    0.98    0.34
  -4 -11   2    0.09    0.20
   4 -11  -2    0.64    0.24
  -4  11   2    0.49    0.24
   4  11  -2    0.63    0.28
  -4  11   2   -0.06    0.32
   3 -11  -2    5.43    0.47
   3 -11  -2    6.01    0.48
  -3 -11   2    5.47    0.52
  -3 -11   2    4.72    0.42
   3  11  -2    5.93    0.49
  -3  11   2    5.04    0.53
   3  11  -2    4.85    0.57
  -2 -11   2    4.21    0.47
   2 -11  -2    2.98    0.42
   2 -11  -2    3.11    0.35
  -2 -11   2    2.92    0.37
   2  11  -2    4.30    0.49
  -2  11   2    3.34    0.48
  -1 -11   2   -0.36    0.20
   1 -11  -2    0.45    0.24
  -1 -11   2   -0.10    0.16
   1 -11  -2    0.16    0.21
  -1  11   2    0.23    0.25
   1  11  -2    0.32    0.24
   1  11  -2   -0.29    0.16
   0 -11   2    1.28    0.27
   0 -11  -2    1.11    0.28
   0 -11  -2    1.25    0.24
   0 -11   2    1.45    0.22
   0  11  -2    1.05    0.27
   0  11  -2    1.01    0.21
   0  11   2    1.56    0.30
  -1 -11  -2    5.40    0.41
   1 -11   2    4.75    0.37
  -1 -11  -2    4.22    0.49
   1 -11   2    4.71    0.40
   1  11   2    4.91    0.40
   1  11   2    4.37    0.50
  -1  11  -2    5.48    0.46
  -1  11  -2    4.95    0.36
   2 -11   2    1.13    0.21
  -2 -11  -2    1.30    0.56
  -2 -11  -2    1.39    0.26
   2 -11   2    0.97    0.22
  -2  11  -2    1.30    0.27
   2  11   2    1.31    0.33
   2  11   2    0.90    0.24
  -2  11  -2    1.06    0.21
  -3 -11  -2    0.76    0.32
  -3 -11  -2    0.62    0.24
   3  11   2    0.56    0.24
  -3  11  -2    0.68    0.28
   3  11   2    0.37    0.32
  -4 -11  -2    2.54    0.44
  -4 -11  -2    2.22    0.41
   4 -11   2    2.56    0.28
   4 -11   2    2.45    0.24
  -4  11  -2    2.98    0.38
  -4  11  -2    2.95    0.38
   4  11   2    2.33    0.38
   5 -11   2    3.62    0.55
  -5 -11  -2    3.74    0.49
   5  11   2    5.52    0.60
  -5  11  -2    5.51    0.60
  -5  11  -2    3.43    0.44
  -6 -11  -2    0.39    0.42
  -6 -11  -2    0.59    0.34
  -6  11  -2    0.24    0.24
   6  11   2    0.09    0.37
  -7 -11  -2    1.58    0.51
  -7 -11  -2    0.40    0.42
  -7  11  -2    0.93    0.30
   7  11   2    0.63    0.45
  -8 -11  -2    0.91    0.55
  -8 -11  -2    1.44    0.59
  -8  11  -2    2.10    0.40
   8  11   2    1.31    0.53
  -8  12   2    0.47    0.39
   7 -12  -2   -0.07    0.51
  -7 -12   2    0.50    0.54
   7  12  -2    0.95    0.48
  -7  12   2    1.29    0.36
  -6 -12   2    2.87    0.53
   6 -12  -2    3.51    0.42
  -6 -12   2    3.00    0.43
   6 -12  -2    2.87    0.66
  -6  12   2    2.80    0.39
   6  12  -2    2.53    0.49
   5 -12  -2    0.74    0.30
  -5 -12   2    0.22    0.40
   5 -12  -2    1.59    0.41
  -5 -12   2    0.45    0.27
   5  12  -2   -0.31    0.32
  -5  12   2   -0.25    0.26
  -4 -12   2    0.23    0.34
   4 -12  -2   -0.16    0.25
  -4 -12   2    0.08    0.22
   4 -12  -2    0.66    0.33
  -4 -12   2   -0.37    0.27
   4  12  -2   -0.55    0.28
  -4  12   2   -0.02    0.23
  -3 -12   2    2.67    0.32
  -3 -12   2    1.87    0.47
   3 -12  -2    2.41    0.35
   3 -12  -2    2.56    0.35
   3  12  -2    2.21    0.35
  -3  12   2    2.88    0.37
  -2 -12   2   11.28    0.69
   2 -12  -2   11.13    0.65
  -2 -12   2   10.38    0.54
   2 -12  -2   11.17    0.63
   2  12  -2   11.09    0.89
  -2  12   2   10.44    0.55
   2  12  -2   10.06    0.60
  -2  12   2   10.55    0.75
  -1 -12   2    1.46    0.25
  -1 -12   2    1.27    0.31
   1 -12  -2    1.34    0.28
   1 -12  -2    1.12    0.30
  -1  12   2    1.13    0.33
  -1  12   2    0.97    0.23
   1  12  -2    1.01    0.25
   1  12  -2    0.95    0.33
   0 -12   2    0.90    0.28
   0 -12   2    0.66    0.23
   0 -12  -2    0.43    0.29
   0 -12  -2    1.71    0.28
   0  12  -2    0.90    0.32
   0  12   2    0.92    0.37
   0  12  -2    0.89    0.23
   0  12   2    1.32    0.26
   1 -12   2    0.47    0.23
  -1 -12  -2    0.08    0.22
  -1 -12  -2   -0.16    0.28
   1 -12   2   -0.17    0.22
  -1  12  -2    0.32    0.28
  -1  12  -2    0.33    0.22
   1  12   2    0.11    0.20
   2 -12   2    3.16    0.38
  -2 -12  -2    2.35    0.40
  -2 -12  -2    2.46    0.33
   2 -12   2    2.63    0.39
  -2  12  -2    3.44    0.49
   2  12   2    3.05    0.42
  -2  12  -2    1.86    0.30
   3 -12   2    0.40    0.22
   3 -12   2    1.18    0.26
  -3 -12  -2    0.47    0.33
   3  12   2   -0.23    0.26
  -3  12  -2    0.68    0.33
  -3  12  -2    0.50    0.21
  -4 -12  -2    9.66    0.79
   4 -12   2    9.31    0.44
   4 -12   2    9.86    0.43
   4  12   2    8.31    0.67
  -4  12  -2    9.85    0.57
  -4  12  -2   10.67    0.72
   5 -12   2   -0.32    0.52
  -5 -12  -2    0.14    0.43
   5  12   2    0.57    0.37
  -5  12  -2   -0.14    0.24
  -6 -12  -2   -0.42    0.47
  -6  12  -2    0.16    0.28
   6  12   2    0.54    0.43
  -7 -12  -2   -0.05    0.55
  -7 -12  -2    0.89    0.49
   7  12   2    1.04    0.53
  -7  12  -2    0.24    0.31
  -7 -13   2   -0.40    0.60
  -7  13   2   -0.30    0.35
   6 -13  -2    0.92    0.39
  -6 -13   2    0.74    0.53
  -6  13   2    1.16    0.37
   6  13  -2    0.16    0.47
  -5 -13   2    1.26    0.35
   5 -13  -2    2.04    0.39
  -5 -13   2    1.88    0.50
  -5  13   2    2.36    0.38
   5  13  -2    2.62    0.50
   4 -13  -2    1.23    0.36
  -4 -13   2    1.30    0.28
  -4 -13   2    1.64    0.45
   4 -13  -2    2.04    0.44
   4  13  -2    1.65    0.41
  -4  13   2    0.76    0.28
   3 -13  -2    0.30    0.31
  -3 -13   2   -0.31    0.28
   3 -13  -2    0.86    0.37
  -3 -13   2    0.53    0.37
  -3  13   2   -0.21    0.22
   3  13  -2    0.07    0.29
   2 -13  -2    1.96    0.38
  -2 -13   2    0.70    0.63
  -2 -13   2    1.79    0.30
   2 -13  -2    1.86    0.41
  -2  13   2    1.29    0.26
   2  13  -2    1.34    0.33
   1 -13  -2    0.37    0.30
   1 -13  -2    0.01    0.31
  -1 -13   2    0.24    0.25
  -1 -13   2    0.75    0.35
  -1  13   2   -0.07    0.21
   1  13  -2    0.25    0.24
   0 -13  -2    1.37    0.38
   0 -13   2    1.94    0.35
   0 -13   2    1.93    0.30
   0 -13  -2    2.11    0.33
   0  13  -2    1.49    0.28
   0  13   2    1.40    0.27
   1 -13   2    2.32    0.31
   1 -13   2    2.22    0.34
  -1 -13  -2    1.55    0.32
  -1 -13  -2    1.61    0.38
   1  13   2    1.27    0.29
  -1  13  -2    1.74    0.28
   2 -13   2    2.56    0.33
  -2 -13  -2    2.83    0.44
   2 -13   2    2.91    0.36
  -3 -13  -2    0.99    0.41
   3 -13   2    1.16    0.29
   3 -13   2    1.11    0.27
  -3  13  -2    0.38    0.23
   3  13   2    0.27    0.32
  -4 -13  -2    2.87    0.49
  -4  13  -2    1.81    0.32
   4  13   2    1.89    0.42
  -5 -13  -2   -0.79    0.47
  -5 -13  -2   -0.30    0.36
  -5  13  -2    0.16    0.30
   5  13   2    0.93    0.45
  -6 -13  -2    4.58    0.67
  -6 -13  -2    6.87    0.76
   6  13   2    5.61    0.68
  -6  13  -2    5.90    0.60
  -5 -14   2    0.28    0.53
   5 -14  -2    0.67    0.43
   5  14  -2    0.19    0.48
  -5  14   2   -0.14    0.33
  -4 -14   2    1.38    0.50
  -4  14   2    0.52    0.31
   4  14  -2    1.36    0.45
   3 -14  -2    0.22    0.38
  -3 -14   2   -0.66    0.40
   3  14  -2    0.43    0.38
  -3  14   2    0.50    0.28
  -2 -14   2    1.71    0.36
   2 -14  -2    0.93    0.39
   2 -14  -2    2.38    0.44
  -2 -14   2    1.69    0.46
   1 -14  -2   -0.12    0.36
  -1 -14   2    0.78    0.65
  -1 -14   2    0.56    0.32
   1 -14  -2    1.32    0.40
  -1  14   2    0.03    0.25
   1  14  -2    0.21    0.28
   0 -14   2    2.34    0.36
   0 -14  -2    1.36    0.42
   0 -14   2    1.31    0.38
   0  14  -2    1.28    0.31
   0  14   2    1.03    0.30
   1 -14   2    0.37    0.50
  -1 -14  -2    0.37    0.40
   1 -14   2    0.78    0.34
   1  14   2    0.62    0.30
  -1  14  -2    0.43    0.26
   2 -14   2    0.24    0.31
  -2 -14  -2    0.24    0.41
   2  14   2   -0.44    0.31
  -2  14  -2    0.02    0.24
  -3 -14  -2    0.47    0.45
  -3  14  -2   -0.38    0.24
   3  14   2    0.02    0.35
   4  14   2    2.02    0.47
  -4  14  -2    1.91    0.34
  -5 -14  -2    0.29    0.57
  -5 -14  -2    0.87    0.54
  -5  14  -2   -0.21    0.31
   5  14   2   -0.46    0.55
  -4 -15   2    1.28    0.56
   4 -15  -2    1.01    0.72
  -4  15   2    0.27    0.35
   3 -15  -2    1.34    0.47
  -3 -15   2    2.15    0.55
   3  15  -2    1.75    0.49
  -3  15   2    1.25    0.36
   2 -15  -2    1.65    0.48
  -2 -15   2    1.26    0.50
   2  15  -2    1.31    0.43
  -2  15   2    0.89    0.33
  -1 -15   2    1.15    0.47
   1 -15  -2    1.74    0.49
   1  15  -2    1.15    0.38
  -1  15   2    1.49    0.37
   0 -15   2    0.56    0.43
   0 -15  -2   -0.26    0.42
   0  15   2    0.24    0.34
   0  15  -2    0.02    0.30
   1 -15   2    0.98    0.44
  -1 -15  -2    0.71    0.45
   1  15   2   -0.38    0.32
  -1  15  -2   -0.45    0.27
  -2 -15  -2    0.24    0.49
   2  15   2    0.15    0.40
  -2  15  -2   -0.67    0.28
  -3 -15  -2    2.03    0.58
   3  15   2    0.38    0.46
  -3  15  -2   -0.34    0.28
 -12   0   3    0.42    0.64
  12   0  -3   -0.57    0.50
 -11   0   3    0.31    0.45
  11   0  -3    0.16    0.41
  10   0  -3   -0.29    0.43
  10   0  -3   -0.04    0.32
 -10   0   3   -0.13    0.36
   9   0  -3    0.35    0.31
   9   0  -3    0.23    0.34
   9   0  -3    0.81    0.43
  -9   0   3    0.07    0.37
  -9   0   3    0.05    0.34
  -8   0   3    0.31    0.29
   8   0  -3   -0.01    0.27
  -8   0   3   -0.06    0.25
   8   0  -3    0.15    0.24
   8   0  -3    0.57    0.34
  -7   0   3   -0.35    0.20
  -7   0   3    0.33    0.23
   7   0  -3    0.03    0.24
   7   0  -3   -0.10    0.22
   7   0  -3    0.14    0.20
   6   0  -3   -0.13    0.19
  -6   0   3   -0.12    0.17
   6   0  -3    0.02    0.21
   6   0  -3   -0.19    0.15
  -6   0   3   -0.08    0.19
   5   0  -3    0.01    0.16
   5   0  -3   -0.01    0.14
  -5   0   3   -0.21    0.13
   5   0  -3   -0.03    0.13
  -5   0   3    0.02    0.15
   4   0  -3   -0.03    0.11
  -4   0   3   -0.09    0.11
  -4   0   3   -0.09    0.11
   4   0  -3   -0.02    0.11
   3   0  -3   -0.12    0.09
  -3   0   3   -0.02    0.11
  -3   0   3   -0.03    0.09
   3   0  -3    0.04    0.10
  -2   0   3    0.05    0.09
   2   0  -3   -0.13    0.08
  -2   0   3   -0.15    0.09
   2   0  -3    0.09    0.08
  -1   0   3    0.03    0.05
   1   0  -3   -0.07    0.06
   1   0  -3   -0.03    0.10
   0   0   3    0.00    0.03
   0   0  -3    0.01    0.03
   0   0  -3   -0.03    0.03
  -1   0  -3   -0.02    0.04
  -1   0  -3   -0.06    0.03
   2   0   3   -0.01    0.04
  -2   0  -3    0.05    0.06
   2   0   3    0.05    0.05
  -2   0  -3    0.02    0.07
  -2   0  -3    0.13    0.10
  -3   0  -3   -0.07    0.08
   3   0   3    0.02    0.07
  -3   0  -3    0.07    0.13
   3   0   3   -0.05    0.06
  -3   0  -3    0.08    0.08
  -4   0  -3    0.28    0.16
   4   0   3    0.01    0.09
  -4   0  -3   -0.23    0.09
   4   0   3    0.02    0.08
  -4   0  -3   -0.02    0.09
  -5   0  -3   -0.05    0.13
   5   0   3   -0.03    0.11
   5   0   3    0.14    0.11
  -5   0  -3   -0.02    0.15
  -5   0  -3    0.06    0.14
  -6   0  -3    0.00    0.18
   6   0   3    0.04    0.14
  -6   0  -3   -0.02    0.17
   6   0   3   -0.20    0.13
   7   0   3   -0.21    0.16
  -7   0  -3   -0.09    0.25
   7   0   3   -0.12    0.16
  -7   0  -3    0.05    0.20
   8   0   3   -0.14    0.19
  -8   0  -3    0.24    0.27
  -8   0  -3    0.80    0.32
  -9   0  -3   -0.36    0.30
   9   0   3   -0.07    0.25
   9   0   3   -0.06    0.24
  -9   0  -3   -0.14    0.39
  10   0   3   -0.07    0.51
  10   0   3   -0.28    0.29
 -10   0  -3    0.23    0.41
  11   0   3   -0.01    0.36
 -11   0  -3    1.33    0.54
  12  -1  -3    0.70    0.47
 -12  -1   3    1.66    0.75
 -12   1   3   -0.01    0.60
  12   1  -3    0.72    0.54
 -11  -1   3    1.85    0.47
  11  -1  -3    1.41    0.43
 -11   1   3    1.81    0.52
  11   1  -3    1.85    0.46
 -10  -1   3    3.07    0.49
  10  -1  -3    3.07    0.51
  10  -1  -3    2.75    0.42
  10   1  -3    2.72    0.45
 -10   1   3    3.45    0.52
  10   1  -3    3.27    0.54
  -9  -1   3    0.59    0.38
   9  -1  -3    0.30    0.27
  -9  -1   3    0.43    0.33
   9  -1  -3    0.72    0.35
   9  -1  -3    1.07    0.43
   9   1  -3   -0.35    0.34
   9   1  -3    0.57    0.42
  -9   1   3   -0.14    0.37
  -9   1   3    0.22    0.33
  -8  -1   3    1.76    0.35
   8  -1  -3    2.94    0.38
  -8  -1   3    2.34    0.38
   8  -1  -3    1.75    0.40
   8  -1  -3    2.72    0.39
  -8   1   3    1.75    0.36
  -8   1   3    2.41    0.39
   8   1  -3    2.01    0.34
   8   1  -3    2.61    0.42
   8   1  -3    2.06    0.35
   7  -1  -3    2.34    0.30
  -7  -1   3    2.04    0.33
  -7  -1   3    1.81    0.32
   7  -1  -3    2.16    0.34
   7  -1  -3    2.28    0.32
  -7   1   3    1.97    0.31
   7   1  -3    3.07    0.60
   7   1  -3    2.23    0.31
   7   1  -3    2.50    0.40
  -7   1   3    2.42    0.35
   6  -1  -3    8.15    0.57
  -6  -1   3    8.37    0.51
   6  -1  -3    8.94    0.53
  -6  -1   3    9.10    0.50
   6  -1  -3    8.89    0.47
   6   1  -3    8.67    0.50
  -6   1   3    8.83    0.49
  -6   1   3    8.97    0.50
   6   1  -3    8.52    0.49
  -5  -1   3    9.47    0.47
  -5  -1   3    9.06    0.45
   5  -1  -3    7.32    0.42
   5  -1  -3    9.22    0.45
   5   1  -3    9.30    0.46
   5   1  -3    8.94    0.45
  -5   1   3    9.16    0.47
  -5   1   3    8.84    0.45
   5   1  -3    8.79    0.46
   4  -1  -3   26.36    0.89
  -4  -1   3   27.52    0.89
  -4  -1   3   28.99    0.91
   4  -1  -3   26.64    0.88
   4   1  -3   27.10    0.89
  -4   1   3   27.07    0.90
  -4   1   3   27.93    0.90
   4   1  -3   28.83    0.91
   4   1  -3   27.19    0.89
   3  -1  -3    1.46    0.19
  -3  -1   3    1.59    0.21
  -3  -1   3    1.76    0.19
   3  -1  -3    1.93    0.19
   3   1  -3    1.73    0.20
   3   1  -3    1.53    0.19
  -3   1   3    1.46    0.20
  -3   1   3    1.60    0.19
   2  -1  -3    8.52    0.34
  -2  -1   3    8.15    0.32
  -2  -1   3    8.60    0.34
   2  -1  -3    8.63    0.33
   2   1  -3    8.32    0.34
  -2   1   3    8.60    0.33
  -2   1   3    9.39    0.35
   2   1  -3    8.90    0.34
   1  -1  -3   56.47    1.58
  -1  -1   3   54.64    1.61
   1  -1  -3   59.74    1.60
  -1  -1   3   60.10    1.58
  -1   1   3   57.29    1.58
  -1   1   3   57.80    1.60
   1   1  -3   62.96    1.59
   0   1   3   18.64    0.54
  -1  -1  -3    7.59    0.26
  -1  -1  -3    7.88    0.25
   1   1   3    7.22    0.30
   1   1   3    7.81    0.25
  -1   1  -3    7.70    0.30
  -2  -1  -3   53.38    1.51
  -2  -1  -3   55.99    1.52
  -2   1  -3   54.28    1.48
  -2   1  -3   55.37    1.48
  -2   1  -3   54.95    1.56
   2   1   3   55.18    1.51
   2   1   3   53.57    1.50
  -3  -1  -3    4.12    0.23
   3  -1   3    4.15    0.16
  -3  -1  -3    4.28    0.24
   3  -1   3    4.14    0.28
  -3  -1  -3    4.12    0.29
  -3   1  -3    4.03    0.21
  -3   1  -3    4.32    0.21
  -3   1  -3    4.08    0.29
   3   1   3    4.12    0.23
   3   1   3    4.44    0.21
  -4  -1  -3   -0.20    0.13
   4  -1   3   -0.07    0.07
   4  -1   3   -0.01    0.07
  -4  -1  -3   -0.08    0.10
   4  -1   3   -0.02    0.14
  -4  -1  -3   -0.06    0.10
   4   1   3   -0.02    0.09
  -4   1  -3    0.08    0.10
  -4   1  -3   -0.15    0.14
  -4   1  -3   -0.03    0.10
   4   1   3   -0.06    0.10
  -5  -1  -3    0.86    0.21
  -5  -1  -3    0.71    0.18
   5  -1   3    0.82    0.13
   5  -1   3    0.53    0.19
  -5  -1  -3    0.47    0.17
   5  -1   3    0.64    0.12
   5   1   3    0.83    0.16
  -5   1  -3    0.72    0.17
  -5   1  -3    0.61    0.17
   5   1   3    0.72    0.15
   6  -1   3   11.06    0.45
  -6  -1  -3   10.93    0.55
   6  -1   3   11.42    0.45
  -6  -1  -3   11.30    0.62
  -6  -1  -3   10.56    0.54
  -6   1  -3   10.36    0.54
   6   1   3   10.88    0.49
   6   1   3   11.09    0.51
  -7  -1  -3    2.18    0.31
  -7  -1  -3    1.95    0.33
   7  -1   3    2.10    0.27
   7  -1   3    2.14    0.28
  -7   1  -3    2.18    0.32
   7   1   3    1.77    0.31
  -7   1  -3    2.17    0.46
   7   1   3    2.47    0.34
   8  -1   3    1.42    0.22
  -8  -1  -3    1.21    0.31
  -8  -1  -3    0.60    0.32
   8  -1   3    1.30    0.23
  -8   1  -3    1.23    0.35
  -8   1  -3    1.24    0.31
   8   1   3    0.93    0.26
   8   1   3    1.25    0.28
  -9  -1  -3    1.04    0.44
  -9  -1  -3    2.02    0.41
   9  -1   3    1.84    0.27
  -9   1  -3    1.80    0.45
   9   1   3    1.87    0.33
  -9   1  -3    1.65    0.40
   9   1   3    2.44    0.38
  10  -1   3   -0.05    0.30
 -10  -1  -3    0.40    0.40
  10  -1   3   -0.05    0.27
 -10   1  -3    0.78    0.41
  10   1   3    0.22    0.36
  10   1   3    0.56    0.33
 -11  -1  -3   -0.28    0.49
  11  -1   3   -0.17    0.39
  11   1   3   -0.84    0.44
 -11   1  -3    0.49    0.51
  12  -2  -3    2.14    0.51
 -12   2   3    2.17    0.74
  12   2  -3    1.57    0.59
  11  -2  -3    0.51    0.38
 -11  -2   3    0.30    0.46
 -11   2   3    0.34    0.46
  11   2  -3   -0.61    0.43
  10  -2  -3    0.78    0.43
  10  -2  -3   -0.26    0.30
 -10  -2   3    0.78    0.41
  10   2  -3   -0.09    0.36
 -10   2   3    0.54    0.37
   9  -2  -3    3.07    0.59
   9  -2  -3    2.79    0.44
   9  -2  -3    2.43    0.36
  -9  -2   3    2.74    0.44
  -9  -2   3    2.42    0.53
   9   2  -3    3.00    0.45
  -9   2   3    3.01    0.48
  -9   2   3    2.54    0.43
   9   2  -3    2.76    0.41
  -8  -2   3    3.65    0.54
   8  -2  -3    3.94    0.42
   8  -2  -3    3.62    0.50
  -8  -2   3    3.58    0.53
   8  -2  -3    4.75    0.52
   8   2  -3    3.79    0.56
  -8   2   3    5.20    0.54
   8   2  -3    3.86    0.48
   8   2  -3    4.52    0.52
  -8   2   3    4.45    0.52
   7  -2  -3   10.52    0.66
   7  -2  -3    9.45    0.57
  -7  -2   3    9.85    0.60
   7  -2  -3   10.17    0.53
  -7  -2   3   11.36    0.60
  -7   2   3    9.50    0.60
   7   2  -3    9.48    0.59
   7   2  -3   10.79    0.63
   7   2  -3    9.68    0.57
  -7   2   3   10.30    0.59
   6  -2  -3    2.14    0.25
  -6  -2   3    1.80    0.29
  -6  -2   3    1.88    0.27
   6   2  -3    2.89    0.41
  -6   2   3    2.07    0.30
   6   2  -3    2.38    0.33
  -6   2   3    2.03    0.28
   6   2  -3    1.96    0.28
  -5  -2   3   23.92    0.86
   5  -2  -3   24.75    0.82
  -5  -2   3   22.50    0.83
   5  -2  -3   25.99    0.85
  -5   2   3   22.92    0.84
   5   2  -3   23.59    0.83
   5   2  -3   24.57    0.86
   5   2  -3   23.02    0.85
  -5   2   3   23.64    0.84
   4  -2  -3   16.59    0.62
   4  -2  -3   16.73    0.60
  -4  -2   3   17.76    0.62
   4   2  -3   16.59    0.63
  -4   2   3   17.35    0.62
   4   2  -3   16.70    0.60
  -4   2   3   16.04    0.62
   4   2  -3   17.57    0.64
   3  -2  -3    0.27    0.11
  -3  -2   3    0.21    0.12
   3  -2  -3   -0.01    0.10
  -3  -2   3    0.39    0.12
  -3   2   3    0.17    0.11
   3   2  -3    0.05    0.10
   3   2  -3    0.29    0.10
   3   2  -3    0.38    0.11
  -3   2   3    0.42    0.12
  -2  -2   3   29.49    0.84
  -2  -2   3   29.33    0.86
   2  -2  -3   29.74    0.85
   2  -2  -3   25.96    0.85
   2   2  -3   28.53    0.81
  -2   2   3   29.07    0.85
  -2   2   3   28.19    0.86
   2   2  -3   28.19    0.85
   2   2  -3   29.04    0.86
  -1  -2   3    9.22    0.33
   1  -2  -3    9.63    0.34
   1  -2  -3    9.46    0.33
  -1  -2   3    9.18    0.30
   1   2  -3    9.87    0.32
  -1   2   3    8.87    0.33
   1   2  -3    8.91    0.33
  -1   2   3    9.81    0.33
   0  -2  -3   39.97    1.13
   0  -2  -3   42.95    1.15
   0   2  -3   41.52    1.10
   0   2   3   41.48    1.14
   0   2   3   38.47    1.12
   0   2  -3   41.56    1.11
  -1  -2  -3   11.21    0.36
   1  -2   3   10.85    0.38
  -1  -2  -3   11.19    0.38
   1   2   3   10.52    0.36
   1   2   3   11.65    0.36
  -1   2  -3   11.01    0.38
  -2  -2  -3   16.76    0.52
   2  -2   3   16.71    0.56
  -2  -2  -3   16.93    0.54
  -2   2  -3   16.59    0.48
   2   2   3   15.53    0.52
  -2   2  -3   17.04    0.57
  -2   2  -3   16.68    0.47
   2   2   3   16.27    0.52
  -3  -2  -3    2.46    0.21
   3  -2   3    2.44    0.25
  -3  -2  -3    2.97    0.20
  -3   2  -3    2.37    0.17
  -3   2  -3    2.67    0.17
   3   2   3    2.26    0.18
   3   2   3    2.62    0.20
  -4  -2  -3   36.78    1.16
   4  -2   3   36.01    1.04
  -4  -2  -3   37.57    1.20
   4  -2   3   38.04    1.04
  -4  -2  -3   38.80    1.14
   4  -2   3   38.08    1.20
  -4   2  -3   36.43    1.11
   4   2   3   37.94    1.14
  -4   2  -3   36.09    1.11
   4   2   3   37.92    1.12
   5  -2   3    1.54    0.27
  -5  -2  -3    1.30    0.22
   5  -2   3    1.57    0.16
   5  -2   3    1.75    0.17
  -5  -2  -3    1.59    0.22
  -5  -2  -3    1.54    0.26
  -5   2  -3    1.77    0.21
   5   2   3    1.67    0.23
  -5   2  -3    1.46    0.20
   5   2   3    1.42    0.21
  -6  -2  -3    2.53    0.34
  -6  -2  -3    2.81    0.42
   6  -2   3    2.44    0.35
   6  -2   3    2.35    0.21
   6  -2   3    2.10    0.22
  -6  -2  -3    2.22    0.30
  -6   2  -3    2.45    0.33
   6   2   3    2.07    0.30
   6   2   3    2.39    0.30
  -6   2  -3    2.70    0.40
   7  -2   3    2.85    0.40
  -7  -2  -3    2.88    0.43
  -7  -2  -3    2.51    0.39
   7  -2   3    2.63    0.27
   7  -2   3    2.93    0.26
  -7  -2  -3    2.86    0.42
   7   2   3    3.02    0.38
   7   2   3    3.41    0.37
  -7   2  -3    2.47    0.32
  -7   2  -3    2.65    0.36
   8  -2   3    0.23    0.18
  -8  -2  -3    0.02    0.28
   8  -2   3    0.25    0.17
  -8  -2  -3    0.72    0.32
  -8   2  -3    0.38    0.27
   8   2   3    0.13    0.26
  -8   2  -3    0.60    0.33
   9  -2   3    0.40    0.20
  -9  -2  -3    0.94    0.37
   9  -2   3    0.29    0.22
  -9   2  -3    0.32    0.39
   9   2   3    0.75    0.31
   9   2   3    0.24    0.30
  -9   2  -3   -0.08    0.30
 -10  -2  -3    1.36    0.46
  10  -2   3    0.78    0.25
  10  -2   3    1.32    0.31
  10   2   3    1.02    0.40
 -10   2  -3    0.89    0.40
  10   2   3    0.99    0.40
 -11  -2  -3    0.80    0.55
 -11   2  -3    1.19    0.51
  11   2   3    0.95    0.43
 -11  -3   3    0.21    0.49
  11  -3  -3    1.38    0.59
  11  -3  -3    0.75    0.37
 -11   3   3    1.31    0.48
  11   3  -3    0.60    0.48
  10  -3  -3    2.32    0.48
  10  -3  -3    2.46    0.39
 -10  -3   3    1.55    0.46
  10   3  -3    2.02    0.46
 -10   3   3    2.06    0.46
   9  -3  -3    0.17    0.25
  -9  -3   3   -0.17    0.33
   9  -3  -3   -0.47    0.34
  -9   3   3   -0.45    0.41
   9   3  -3   -0.32    0.30
   9   3  -3    0.34    0.40
  -9   3   3    0.35    0.32
   8  -3  -3    0.10    0.36
   8  -3  -3    0.38    0.30
   8  -3  -3    0.38    0.23
  -8  -3   3    0.79    0.43
  -8  -3   3    1.05    0.33
   8   3  -3    0.48    0.32
  -8   3   3    0.96    0.30
   8   3  -3    0.11    0.26
  -8   3   3    0.21    0.29
  -7  -3   3    2.23    0.32
  -7  -3   3    1.17    0.30
   7  -3  -3    1.91    0.26
   7  -3  -3    2.00    0.39
   7  -3  -3    1.75    0.29
  -7   3   3    2.17    0.35
   7   3  -3    2.14    0.33
  -7   3   3    2.09    0.35
   7   3  -3    2.33    0.35
   6  -3  -3    2.59    0.36
  -6  -3   3    2.85    0.39
   6  -3  -3    2.43    0.30
  -6  -3   3    3.06    0.36
   6   3  -3    2.89    0.37
   6   3  -3    2.41    0.33
  -6   3   3    2.48    0.36
  -6   3   3    2.60    0.31
   6   3  -3    2.63    0.36
   5  -3  -3    5.80    0.38
  -5  -3   3    5.97    0.42
  -5  -3   3    5.69    0.45
   5  -3  -3    5.77    0.34
   5   3  -3    5.46    0.46
   5   3  -3    5.38    0.38
  -5   3   3    5.82    0.39
   5   3  -3    5.84    0.36
  -5   3   3    5.42    0.43
   4  -3  -3   34.56    1.07
   4  -3  -3   35.86    1.10
  -4  -3   3   35.60    1.13
  -4  -3   3   36.39    1.09
  -4   3   3   35.92    1.10
   4   3  -3   36.15    1.12
  -4   3   3   34.63    1.10
   4   3  -3   33.75    1.06
   4   3  -3   32.23    1.09
   3  -3  -3    9.59    0.40
   3  -3  -3    9.47    0.38
  -3  -3   3    9.89    0.38
  -3   3   3    9.77    0.41
  -3   3   3   10.16    0.40
   3   3  -3    9.36    0.40
   3   3  -3    9.32    0.42
  -2  -3   3    1.24    0.18
   2  -3  -3    1.15    0.15
  -2  -3   3    1.36    0.14
   2  -3  -3    1.10    0.14
  -2   3   3    1.19    0.16
   2   3  -3    1.39    0.18
  -2   3   3    1.37    0.17
   2   3  -3    1.49    0.16
  -1  -3   3   10.78    0.33
   1  -3  -3   10.64    0.38
   1  -3  -3   10.58    0.37
  -1  -3   3   11.07    0.37
   1   3  -3   10.08    0.35
  -1   3   3   10.29    0.38
   1   3  -3   10.96    0.38
  -1   3   3   10.81    0.36
   0  -3   3    4.34    0.17
   0  -3   3    4.32    0.15
   0  -3  -3    4.50    0.21
   0  -3   3    4.06    0.16
   0   3   3    4.34    0.20
   0   3  -3    4.52    0.18
   0   3   3    4.47    0.21
   1  -3   3   26.52    0.78
  -1  -3  -3   25.43    0.79
  -1  -3  -3   27.17    0.76
  -1   3  -3   25.73    0.72
  -1   3  -3   25.90    0.72
   1   3   3   25.19    0.76
   1   3   3   26.49    0.78
   2  -3   3    1.67    0.19
  -2  -3  -3    1.98    0.18
  -2  -3  -3    1.86    0.15
  -2   3  -3    1.70    0.10
   2   3   3    1.80    0.17
   2   3   3    1.70    0.17
  -3  -3  -3    0.48    0.12
  -3  -3  -3    0.54    0.14
   3  -3   3    0.48    0.15
  -3   3  -3    0.37    0.08
  -3   3  -3    0.36    0.10
   3   3   3    0.35    0.12
   3   3   3    0.32    0.11
  -4  -3  -3   11.09    0.45
   4  -3   3   10.22    0.51
  -4  -3  -3   10.38    0.49
   4  -3   3   10.45    0.32
   4  -3   3    9.61    0.33
  -4  -3  -3   10.53    0.47
  -4   3  -3   10.80    0.41
  -4   3  -3   10.54    0.42
   4   3   3   10.36    0.45
   4   3   3   10.89    0.45
   5  -3   3    2.22    0.17
  -5  -3  -3    2.65    0.31
   5  -3   3    2.04    0.28
  -5  -3  -3    3.04    0.30
   5  -3   3    2.37    0.15
  -5  -3  -3    2.00    0.27
   5   3   3    2.33    0.29
  -5   3  -3    2.43    0.26
  -5   3  -3    2.38    0.28
   5   3   3    2.52    0.28
  -6  -3  -3    0.31    0.23
  -6  -3  -3    0.81    0.22
   6  -3   3    0.38    0.11
   6  -3   3    0.17    0.26
   6  -3   3    0.46    0.12
  -6  -3  -3   -0.03    0.33
   6   3   3    0.57    0.19
  -6   3  -3    0.71    0.27
   6   3   3    0.56    0.21
  -6   3  -3    0.43    0.21
  -7  -3  -3    0.95    0.29
   7  -3   3    1.13    0.36
   7  -3   3    1.64    0.18
  -7  -3  -3    1.18    0.28
  -7  -3  -3    1.59    0.31
   7  -3   3    1.55    0.17
   7   3   3    1.45    0.28
   7   3   3    1.67    0.27
  -7   3  -3    1.05    0.31
  -7   3  -3    1.59    0.29
   8  -3   3    0.23    0.15
  -8  -3  -3    0.04    0.30
  -8  -3  -3    0.27    0.35
   8  -3   3    0.17    0.42
  -8  -3  -3   -0.02    0.31
   8  -3   3    0.18    0.16
  -8   3  -3   -0.01    0.24
  -8   3  -3    0.06    0.30
   8   3   3    0.37    0.27
   8   3   3    0.77    0.27
   9  -3   3    0.78    0.21
  -9  -3  -3    0.68    0.37
   9  -3   3    1.03    0.19
   9   3   3    0.69    0.34
  -9   3  -3    0.91    0.35
   9   3   3    1.16    0.35
  -9   3  -3    0.51    0.44
 -10  -3  -3    0.02    0.42
  10  -3   3    0.30    0.20
  10   3   3    0.75    0.41
  10   3   3    0.11    0.42
 -10   3  -3    0.59    0.40
 -11  -3  -3    0.16    0.54
  11   3   3   -0.21    0.50
 -11  -4   3    2.08    0.55
  11  -4  -3    0.96    0.39
 -11   4   3    1.14    0.49
  11   4  -3    1.12    0.54
  10  -4  -3    0.57    0.34
  10  -4  -3    1.94    0.48
 -10  -4   3    0.46    0.43
  10   4  -3    1.33    0.43
 -10   4   3    0.83    0.39
  -9  -4   3   -0.15    0.33
   9  -4  -3    0.55    0.26
   9  -4  -3    0.67    0.36
  -9   4   3    0.48    0.31
   9   4  -3    0.72    0.48
   9   4  -3   -0.22    0.32
  -8  -4   3    2.92    0.41
   8  -4  -3    2.74    0.39
  -8  -4   3    2.55    0.40
   8  -4  -3    2.62    0.38
   8  -4  -3    3.48    0.51
   8   4  -3    3.39    0.43
  -8   4   3    2.94    0.46
  -8   4   3    3.14    0.44
   8   4  -3    2.65    0.48
  -7  -4   3    9.86    0.57
   7  -4  -3    9.52    0.58
  -7  -4   3   10.08    0.63
   7  -4  -3    9.25    0.50
   7   4  -3    9.19    0.61
   7   4  -3    8.98    0.59
  -7   4   3   10.30    0.62
  -7   4   3    8.15    0.57
  -6  -4   3   -0.22    0.20
   6  -4  -3    0.18    0.16
   6  -4  -3    0.00    0.19
  -6  -4   3    0.01    0.18
  -6   4   3    0.54    0.26
  -6   4   3    0.18    0.22
   6   4  -3    0.12    0.24
   6   4  -3    0.30    0.21
  -5  -4   3    0.18    0.16
   5  -4  -3    0.11    0.13
  -5  -4   3    0.07    0.18
   5  -4  -3    0.16    0.18
   5   4  -3    0.27    0.19
  -5   4   3    0.37    0.20
   5   4  -3    0.29    0.17
  -5   4   3    0.32    0.17
   4  -4  -3    2.01    0.26
  -4  -4   3    2.06    0.26
  -4  -4   3    2.30    0.24
   4  -4  -3    2.26    0.22
   4   4  -3    2.06    0.27
  -4   4   3    2.49    0.26
  -4   4   3    1.88    0.26
   4   4  -3    2.14    0.25
   3  -4  -3   33.71    1.03
   3  -4  -3   33.27    1.01
  -3  -4   3   32.79    0.99
  -3  -4   3   33.47    1.05
   3   4  -3   34.88    1.06
  -3   4   3   33.58    1.02
  -3   4   3   32.38    1.03
   3   4  -3   33.12    1.03
  -2  -4   3    2.41    0.21
  -2  -4   3    2.28    0.13
   2  -4  -3    2.44    0.19
   2  -4  -3    2.23    0.20
  -2  -4   3    2.26    0.16
  -2   4   3    2.28    0.20
  -2   4   3    2.71    0.20
   2   4  -3    2.29    0.21
   2   4  -3    2.42    0.19
  -1  -4   3    0.23    0.09
  -1  -4   3    0.31    0.07
   1  -4  -3    0.32    0.10
   1  -4  -3    0.34    0.10
  -1   4   3    0.33    0.09
   1   4  -3    0.44    0.10
   1   4  -3    0.41    0.08
  -1   4   3    0.44    0.11
   0  -4   3    0.02    0.05
   0  -4  -3   -0.01    0.08
   0  -4   3    0.02    0.07
   0  -4  -3    0.05    0.08
   0   4   3   -0.04    0.07
   0   4  -3   -0.05    0.06
   0   4  -3    0.04    0.05
   0   4   3   -0.01    0.08
  -1  -4  -3   11.28    0.40
  -1  -4  -3   11.62    0.44
   1  -4   3   11.70    0.41
  -1   4  -3   12.44    0.37
   1   4   3   12.07    0.40
   1   4   3   10.46    0.42
  -1   4  -3   11.97    0.37
  -2  -4  -3    1.21    0.16
  -2  -4  -3    1.19    0.15
   2  -4   3    0.94    0.15
  -2   4  -3    1.00    0.14
   2   4   3    1.26    0.17
   2   4   3    1.47    0.18
  -2   4  -3    1.34    0.11
  -3  -4  -3   17.06    0.62
   3  -4   3   16.04    0.63
  -3  -4  -3   15.96    0.56
  -3   4  -3   16.41    0.53
   3   4   3   17.27    0.60
   3   4   3   17.17    0.60
  -3   4  -3   16.43    0.55
  -4  -4  -3    0.48    0.17
  -4  -4  -3    0.63    0.20
   4  -4   3    0.95    0.21
  -4   4  -3    0.60    0.13
  -4   4  -3    0.20    0.13
   4   4   3    0.48    0.15
   4   4   3    0.41    0.16
  -5  -4  -3    1.81    0.28
   5  -4   3    1.47    0.28
   5  -4   3    1.38    0.13
  -5  -4  -3    1.33    0.21
  -5  -4  -3    1.46    0.25
   5   4   3    1.47    0.23
  -5   4  -3    1.56    0.21
   5   4   3    1.63    0.23
  -5   4  -3    1.48    0.22
  -6  -4  -3    0.86    0.27
   6  -4   3    1.11    0.14
  -6  -4  -3    1.08    0.24
   6  -4   3    1.24    0.30
  -6  -4  -3    1.27    0.27
   6  -4   3    1.18    0.16
   6   4   3    0.70    0.23
  -6   4  -3    1.37    0.25
   6   4   3    1.18    0.24
  -6   4  -3    1.24    0.43
   7  -4   3    1.48    0.17
  -7  -4  -3    1.07    0.30
   7  -4   3    1.67    0.20
  -7  -4  -3    1.53    0.35
  -7  -4  -3    1.34    0.31
   7  -4   3    2.46    0.42
   7   4   3    1.34    0.28
   7   4   3    1.48    0.30
  -7   4  -3    1.32    0.28
   8  -4   3    4.29    0.28
   8  -4   3    4.43    0.58
   8  -4   3    4.22    0.25
  -8  -4  -3    3.91    0.47
  -8  -4  -3    4.03    0.55
  -8  -4  -3    5.08    0.62
   8   4   3    4.83    0.51
  -8   4  -3    4.78    0.58
  -8   4  -3    4.17    0.51
   8   4   3    4.51    0.53
   9  -4   3    0.41    0.16
  -9  -4  -3    1.16    0.42
   9  -4   3    0.49    0.14
  -9   4  -3    0.58    0.35
  -9   4  -3    0.44    0.45
   9   4   3    0.57    0.36
   9   4   3    0.40    0.34
 -10  -4  -3    2.69    0.56
  10   4   3    2.85    0.52
 -10   4  -3    2.93    0.51
  10   4   3    3.14    0.51
 -11  -4  -3   -0.95    0.56
 -11   4  -3    1.23    0.56
  11   4   3    1.17    0.54
 -11  -5   3   -0.09    0.53
  11  -5  -3    0.63    0.39
 -11   5   3    0.69    0.48
  11   5  -3    0.70    0.53
  10  -5  -3   -0.11    0.54
  10  -5  -3    0.50    0.50
 -10  -5   3    0.88    0.47
 -10   5   3    0.66    0.40
  10   5  -3   -0.06    0.40
   9  -5  -3   -0.34    0.36
   9  -5  -3    0.05    0.24
  -9  -5   3   -0.22    0.35
  -9   5   3   -0.07    0.31
   9   5  -3    0.51    0.35
   8  -5  -3    0.35    0.22
  -8  -5   3    0.03    0.30
   8  -5  -3   -0.12    0.27
  -8  -5   3    0.07    0.30
   8  -5  -3    0.23    0.44
   8   5  -3    0.30    0.35
  -8   5   3    0.41    0.36
  -8   5   3    0.43    0.29
   8   5  -3    0.29    0.30
   7  -5  -3    0.37    0.25
   7  -5  -3    0.27    0.19
  -7  -5   3    0.40    0.28
  -7  -5   3    0.37    0.25
   7   5  -3    0.34    0.29
   7   5  -3    0.19    0.26
  -7   5   3    0.32    0.28
  -7   5   3   -0.08    0.22
  -6  -5   3   -0.13    0.19
   6  -5  -3    0.00    0.15
   6  -5  -3    0.45    0.22
  -6  -5   3    0.07    0.24
   6   5  -3    0.17    0.24
  -6   5   3    0.19    0.21
   6   5  -3    0.11    0.21
  -6   5   3    0.01    0.21
  -5  -5   3    0.44    0.23
   5  -5  -3    0.50    0.20
   5  -5  -3    0.66    0.17
  -5  -5   3    0.53    0.17
   5   5  -3    0.78    0.21
  -5   5   3    0.76    0.21
   5   5  -3    0.71    0.23
  -5   5   3    0.55    0.20
   4  -5  -3   11.11    0.46
  -4  -5   3   11.40    0.45
  -4  -5   3   10.75    0.53
  -4  -5   3   11.65    0.48
   4  -5  -3   10.89    0.49
   4   5  -3   11.26    0.50
   4   5  -3    9.72    0.53
  -4   5   3   10.69    0.48
  -4   5   3   10.74    0.53
   3  -5  -3    0.30    0.14
  -3  -5   3    0.31    0.15
   3  -5  -3    0.39    0.12
  -3  -5   3    0.30    0.10
  -3  -5   3    0.41    0.11
  -3   5   3    0.23    0.13
   3   5  -3    0.33    0.13
   3   5  -3    0.07    0.13
  -3   5   3    0.28    0.13
  -2  -5   3   -0.12    0.10
  -2  -5   3    0.06    0.08
   2  -5  -3    0.09    0.11
   2  -5  -3    0.15    0.10
  -2  -5   3    0.03    0.07
   2   5  -3    0.00    0.11
  -2   5   3    0.08    0.10
   2   5  -3    0.09    0.10
  -2   5   3    0.11    0.11
   1  -5  -3    0.31    0.11
   1  -5  -3    0.38    0.11
  -1  -5   3    0.43    0.12
  -1   5   3    0.49    0.12
   1   5  -3    0.48    0.09
   1   5  -3    0.44    0.11
  -1   5   3    0.45    0.12
   0  -5   3   10.23    0.36
   0  -5  -3   10.20    0.41
   0  -5   3   10.01    0.33
   0  -5  -3   10.24    0.38
   0   5  -3   10.66    0.35
   0   5   3   10.26    0.38
   0   5   3    9.71    0.40
   0   5  -3   10.02    0.38
  -1  -5  -3   35.69    1.09
  -1  -5  -3   33.45    1.03
   1  -5   3   34.56    0.98
  -1   5  -3   34.95    1.02
   1   5   3   34.85    1.04
   1   5   3   38.47    1.08
  -1   5  -3   35.97    1.00
  -2  -5  -3    2.47    0.20
  -2  -5  -3    2.24    0.24
  -2   5  -3    2.50    0.16
   2   5   3    2.65    0.22
  -2   5  -3    2.68    0.18
   2   5   3    2.37    0.23
   3  -5   3    0.62    0.17
  -3  -5  -3    0.55    0.16
  -3  -5  -3    0.70    0.15
  -3   5  -3    0.48    0.13
   3   5   3    0.61    0.16
  -3   5  -3    0.56    0.11
   3   5   3    0.55    0.15
  -4  -5  -3    0.02    0.16
   4  -5   3   -0.04    0.18
  -4  -5  -3    0.20    0.14
   4   5   3    0.38    0.17
   4   5   3    0.23    0.16
  -4   5  -3   -0.23    0.13
  -4   5  -3    0.05    0.11
  -5  -5  -3    3.48    0.40
  -5  -5  -3    3.28    0.38
   5  -5   3    3.87    0.42
  -5  -5  -3    3.13    0.37
   5   5   3    3.22    0.33
   5   5   3    3.50    0.35
  -5   5  -3    2.35    0.31
  -5   5  -3    2.36    0.28
  -6  -5  -3    3.28    0.37
  -6  -5  -3    3.07    0.42
  -6  -5  -3    3.21    0.43
   6  -5   3    2.31    0.38
   6   5   3    2.89    0.33
   6   5   3    3.24    0.40
  -6   5  -3    2.61    0.36
  -6   5  -3    2.86    0.37
  -7  -5  -3    1.01    0.27
   7  -5   3    1.77    0.41
  -7  -5  -3    1.36    0.62
  -7  -5  -3    0.95    0.31
  -7   5  -3    1.09    0.26
  -7   5  -3    1.52    0.32
   7   5   3    1.04    0.28
   7   5   3    1.04    0.29
  -8  -5  -3    1.90    0.44
  -8  -5  -3    2.07    0.42
   8   5   3    2.35    0.40
  -8   5  -3    2.85    0.38
  -8   5  -3    1.33    0.40
  -9  -5  -3    2.46    0.48
  -9   5  -3    2.18    0.41
  -9   5  -3    2.58    0.51
   9   5   3    2.32    0.44
   9   5   3    2.16    0.46
 -10  -5  -3    0.06    0.49
 -10   5  -3   -0.02    0.40
  10   5   3    0.12    0.44
 -11   5  -3    4.48    0.66
  11   5   3    5.86    0.73
  11  -6  -3    0.76    0.39
 -11  -6   3    0.20    0.70
 -11   6   3    0.88    0.53
  11   6  -3    0.38    0.55
 -10  -6   3   -0.11    0.46
  10  -6  -3    0.99    0.52
  10   6  -3    0.73    0.46
 -10   6   3    1.20    0.42
  -9  -6   3    0.45    0.40
   9  -6  -3    0.32    0.41
   9  -6  -3    0.64    0.27
  -9   6   3    0.41    0.34
   9   6  -3    0.89    0.39
  -8  -6   3    7.84    0.68
   8  -6  -3    8.14    0.62
   8  -6  -3    7.38    0.49
  -8   6   3    8.46    0.62
  -8   6   3    7.51    0.72
   8   6  -3    8.03    0.85
   8   6  -3    8.28    0.66
   7  -6  -3    2.85    0.34
   7  -6  -3    3.52    0.46
  -7  -6   3    2.15    0.66
  -7  -6   3    2.82    0.34
  -7   6   3    3.04    0.41
  -7   6   3    3.39    0.43
   7   6  -3    2.94    0.41
   7   6  -3    2.73    0.50
   6  -6  -3    0.35    0.23
   6  -6  -3   -0.07    0.16
  -6  -6   3    0.29    0.24
  -6  -6   3    0.06    0.19
  -6   6   3    0.22    0.23
   6   6  -3   -0.14    0.24
  -6   6   3   -0.10    0.23
   6   6  -3    0.22    0.21
   5  -6  -3    0.54    0.16
  -5  -6   3    0.56    0.24
  -5   6   3    0.38    0.20
   5   6  -3    0.80    0.22
  -5   6   3    0.51    0.24
   5   6  -3    0.45    0.24
   4  -6  -3    1.66    0.23
  -4  -6   3    1.93    0.24
   4  -6  -3    1.72    0.24
  -4  -6   3    2.02    0.22
  -4  -6   3    1.95    0.26
  -4   6   3    1.73    0.23
   4   6  -3    1.73    0.24
   4   6  -3    2.04    0.26
  -4   6   3    1.39    0.22
  -3  -6   3    5.99    0.30
  -3  -6   3    6.09    0.28
   3  -6  -3    5.83    0.33
   3  -6  -3    5.84    0.36
  -3  -6   3    5.69    0.37
   3   6  -3    7.04    0.59
  -3   6   3    5.80    0.37
  -3   6   3    5.98    0.34
   3   6  -3    6.09    0.35
  -2  -6   3    1.80    0.24
  -2  -6   3    2.03    0.18
   2  -6  -3    1.59    0.21
   2  -6  -3    1.74    0.24
   2   6  -3    2.39    0.22
   2   6  -3    2.09    0.25
  -2   6   3    2.13    0.22
  -2   6   3    2.56    0.24
   1  -6  -3   22.24    0.72
  -1  -6   3   21.26    0.73
   1  -6  -3   22.53    0.75
  -1  -6   3   22.11    0.68
   1   6  -3   22.53    0.69
   1   6  -3   22.40    0.74
  -1   6   3   22.42    0.74
   0  -6   3    0.01    0.07
   0  -6  -3   -0.15    0.10
   0  -6   3    0.20    0.09
   0  -6  -3    0.11    0.10
   0   6  -3   -0.06    0.09
   0   6  -3    0.06    0.08
   0   6   3    0.10    0.09
   0   6   3   -0.10    0.11
   1  -6   3    1.03    0.14
   1  -6   3    1.35    0.15
  -1  -6  -3    1.16    0.17
   1   6   3    1.47    0.18
  -1   6  -3    1.33    0.16
   1   6   3    1.14    0.16
  -1   6  -3    1.64    0.17
  -2  -6  -3    0.21    0.13
   2  -6   3    0.11    0.07
  -2  -6  -3    0.27    0.13
  -2   6  -3    0.18    0.09
   2   6   3    0.07    0.12
  -2   6  -3    0.11    0.09
   2   6   3    0.40    0.13
   3  -6   3    2.40    0.30
  -3  -6  -3    2.05    0.23
  -3  -6  -3    1.97    0.29
  -3   6  -3    2.25    0.20
  -3   6  -3    2.15    0.22
   3   6   3    2.27    0.26
   3   6   3    1.95    0.27
  -4  -6  -3    2.31    0.28
   4  -6   3    1.58    0.33
  -4  -6  -3    1.93    0.27
  -4   6  -3    1.73    0.25
   4   6   3    2.25    0.31
   4   6   3    2.24    0.31
  -4   6  -3    2.14    0.24
   5  -6   3    9.41    0.93
  -5  -6  -3   10.30    0.49
  -5  -6  -3   10.60    0.59
  -5  -6  -3   10.14    0.56
   5   6   3    9.31    0.54
  -5   6  -3   10.05    0.48
  -5   6  -3   10.01    0.48
   5   6   3    9.45    0.54
  -6  -6  -3    1.39    0.29
  -6  -6  -3    1.23    0.25
  -6  -6  -3    1.78    0.33
  -6   6  -3    2.04    0.29
   6   6   3    1.02    0.27
   6   6   3    1.66    0.29
  -6   6  -3    1.52    0.25
  -7  -6  -3    1.50    0.36
  -7  -6  -3    0.86    0.31
   7  -6   3    1.89    0.41
  -7  -6  -3    1.47    0.34
  -7   6  -3    1.15    0.27
  -7   6  -3    1.52    0.33
   7   6   3    1.39    0.35
   7   6   3    1.46    0.35
  -8  -6  -3    5.38    0.65
  -8  -6  -3    3.73    0.50
  -8   6  -3    4.48    0.52
   8   6   3    3.45    0.48
  -8   6  -3    5.17    0.66
   8   6   3    4.54    0.52
  -9  -6  -3    1.67    0.47
  -9  -6  -3    1.69    0.52
  -9   6  -3    1.21    0.38
   9   6   3    1.41    0.43
 -10  -6  -3    4.48    0.69
 -10   6  -3    4.36    0.56
  10   6   3    4.36    0.60
 -10  -7   3    1.04    0.53
 -10   7   3    0.55    0.42
  10   7  -3   -0.06    0.50
   9  -7  -3    2.37    0.47
   9  -7  -3    1.75    0.33
  -9  -7   3    1.57    0.48
   9   7  -3    1.60    0.45
  -9   7   3    2.19    0.40
   8  -7  -3    0.52    0.33
   8  -7  -3    0.71    0.25
  -8  -7   3    0.21    0.34
   8   7  -3    0.62    0.37
  -8   7   3   -0.12    0.28
  -7  -7   3    0.47    0.34
   7  -7  -3    1.35    0.41
   7  -7  -3    0.91    0.24
  -7  -7   3    0.84    0.29
   7   7  -3    1.22    0.39
   7   7  -3    0.85    0.30
  -7   7   3    1.04    0.36
  -6  -7   3    3.57    0.42
  -6  -7   3    3.21    0.38
   6  -7  -3    3.46    0.34
   6  -7  -3    4.08    0.45
  -6   7   3    3.03    0.40
  -6   7   3    4.05    0.48
   6   7  -3    3.12    0.38
   6   7  -3    3.66    0.50
  -5  -7   3    0.19    0.18
  -5  -7   3    0.08    0.18
   5  -7  -3    0.29    0.17
   5  -7  -3    0.27    0.23
  -5  -7   3    0.33    0.24
   5   7  -3    0.51    0.21
   5   7  -3    0.35    0.25
  -5   7   3   -0.13    0.19
  -5   7   3    0.08    0.22
   4  -7  -3    0.09    0.14
  -4  -7   3    0.17    0.14
  -4  -7   3   -0.19    0.18
  -4  -7   3   -0.11    0.14
   4   7  -3    0.08    0.18
  -4   7   3   -0.10    0.18
  -4   7   3   -0.02    0.16
   4   7  -3   -0.10    0.22
   3  -7  -3    0.07    0.17
  -3  -7   3    0.26    0.16
   3  -7  -3    0.25    0.14
  -3  -7   3    0.18    0.18
  -3  -7   3    0.20    0.10
   3   7  -3    0.17    0.15
   3   7  -3    0.02    0.17
  -3   7   3    0.03    0.15
  -3   7   3    0.14    0.14
  -2  -7   3    0.57    0.17
   2  -7  -3    0.35    0.16
  -2  -7   3    0.49    0.13
   2  -7  -3    0.49    0.15
   2   7  -3    0.60    0.29
  -2   7   3    0.50    0.16
  -2   7   3    0.52    0.15
   2   7  -3    0.58    0.15
   1  -7  -3    1.75    0.24
   1  -7  -3    2.32    0.24
  -1  -7   3    1.97    0.19
  -1  -7   3    1.64    0.23
   1   7  -3    1.81    0.20
  -1   7   3    1.99    0.24
   1   7  -3    2.12    0.25
  -1   7   3    1.87    0.25
   0  -7  -3    0.30    0.14
   0  -7   3    0.16    0.11
   0  -7  -3    0.33    0.12
   0  -7   3    0.28    0.11
   0   7   3    0.45    0.13
   0   7   3    0.23    0.16
   0   7  -3    0.53    0.14
   0   7  -3    0.37    0.10
   1  -7   3    2.30    0.19
  -1  -7  -3    1.72    0.23
   1  -7   3    1.76    0.19
  -1  -7  -3    2.07    0.27
  -1   7  -3    2.40    0.21
   1   7   3    2.37    0.27
   1   7   3    2.18    0.22
   2  -7   3    1.11    0.15
  -2  -7  -3    0.73    0.18
   2  -7   3    1.27    0.13
  -2  -7  -3    0.80    0.16
  -2   7  -3    0.92    0.14
   2   7   3    1.04    0.18
   2   7   3    1.28    0.21
  -2   7  -3    1.09    0.15
  -3  -7  -3    2.88    0.28
  -3  -7  -3    2.74    0.35
   3   7   3    3.06    0.32
  -3   7  -3    2.49    0.24
   3   7   3    3.05    0.33
  -3   7  -3    2.84    0.25
  -4  -7  -3    0.01    0.19
   4  -7   3    0.16    0.23
  -4  -7  -3    0.13    0.16
   4   7   3    0.06    0.19
   4   7   3    0.04    0.18
  -4   7  -3   -0.09    0.15
  -4   7  -3   -0.02    0.14
   5  -7   3    1.06    0.33
  -5  -7  -3    0.76    0.26
  -5  -7  -3    0.44    0.21
  -5   7  -3    0.59    0.19
   5   7   3    0.55    0.23
   5   7   3    0.71    0.25
  -5   7  -3    0.58    0.21
  -6  -7  -3    2.00    0.32
  -6  -7  -3    2.36    0.36
  -6  -7  -3    2.50    0.38
   6  -7   3    3.14    0.45
   6   7   3    2.48    0.35
   6   7   3    2.26    0.33
  -6   7  -3    1.97    0.52
  -6   7  -3    2.14    0.28
   7  -7   3   11.27    0.87
  -7  -7  -3   12.52    0.75
  -7  -7  -3   12.22    0.77
   7   7   3   11.36    0.72
   7   7   3   13.78    0.77
  -7   7  -3   11.79    0.65
  -7   7  -3   12.09    0.72
  -8  -7  -3    0.34    0.38
  -8  -7  -3    0.18    0.38
   8   7   3    0.56    0.36
  -8   7  -3    0.82    0.41
  -9  -7  -3    1.92    0.52
  -9  -7  -3    0.71    0.49
  -9   7  -3    1.32    0.39
   9   7   3    1.20    0.44
 -10  -7  -3    1.60    0.63
  10   7   3    1.33    0.55
 -10   7  -3    1.60    0.50
  10  -8  -3    0.23    0.45
 -10  -8   3    0.91    0.58
 -10   8   3    0.91    0.42
  10   8  -3    0.31    0.55
  -9  -8   3    0.45    0.48
   9  -8  -3    0.40    0.30
   9  -8  -3    0.56    0.46
   9   8  -3   -0.75    0.43
  -9   8   3    0.14    0.33
   8  -8  -3    3.12    0.44
  -8  -8   3    3.80    0.54
   8  -8  -3    4.35    0.63
   8   8  -3    3.73    0.53
  -8   8   3    4.23    0.54
  -7  -8   3    4.91    0.50
  -7  -8   3    5.50    0.63
   7  -8  -3    6.35    0.58
   7  -8  -3    5.83    0.44
  -7   8   3    5.11    0.65
  -7   8   3    5.90    0.51
   7   8  -3    5.60    0.58
   6  -8  -3    1.88    0.26
   6  -8  -3    2.01    0.37
  -6  -8   3    1.62    0.57
  -6  -8   3    1.36    0.27
  -6   8   3    1.82    0.29
   6   8  -3    1.67    0.40
   6   8  -3    1.29    0.32
  -6   8   3    2.15    0.39
  -5  -8   3    0.70    0.20
   5  -8  -3    0.65    0.19
   5  -8  -3    0.76    0.25
  -5  -8   3    0.73    0.21
  -5  -8   3    0.66    0.27
  -5   8   3    0.88    0.22
   5   8  -3    0.62    0.24
  -5   8   3    1.19    0.27
   5   8  -3    0.34    0.26
   4  -8  -3    1.36    0.26
   4  -8  -3    1.48    0.23
  -4  -8   3    1.65    0.28
  -4  -8   3    1.61    0.30
  -4  -8   3    1.38    0.20
  -4   8   3    1.72    0.28
  -4   8   3    1.08    0.22
   4   8  -3    1.78    0.30
   4   8  -3    1.88    0.29
  -3  -8   3   19.70    0.77
   3  -8  -3   17.29    0.69
  -3  -8   3   18.85    0.66
  -3  -8   3   18.71    0.61
   3  -8  -3   18.23    0.71
   3   8  -3   18.92    0.72
  -3   8   3   18.16    0.69
   3   8  -3   17.54    0.85
   2  -8  -3    9.82    0.47
   2  -8  -3    9.21    0.47
  -2  -8   3    9.23    0.47
  -2   8   3    9.24    0.46
   2   8  -3    8.44    0.44
   2   8  -3    9.04    0.48
  -2   8   3    9.33    0.48
   1  -8  -3    5.82    0.37
   1  -8  -3    5.89    0.36
  -1  -8   3    5.58    0.36
  -1  -8   3    5.46    0.30
   1   8  -3    4.86    0.36
  -1   8   3    6.09    0.35
  -1   8   3    5.89    0.37
   1   8  -3    5.49    0.31
   0  -8   3    0.10    0.12
   0  -8  -3    0.00    0.14
   0  -8  -3    0.16    0.16
   0  -8   3    0.14    0.14
   0   8   3    0.32    0.13
   0   8  -3    0.08    0.12
   0   8   3    0.14    0.16
   0   8  -3   -0.01    0.13
   1  -8   3    0.31    0.13
  -1  -8  -3    0.63    0.17
  -1  -8  -3    0.62    0.20
   1  -8   3    0.40    0.13
   1   8   3    0.05    0.16
   1   8   3    0.73    0.17
  -1   8  -3    0.27    0.14
  -1   8  -3    0.82    0.15
   2  -8   3    1.38    0.19
   2  -8   3    1.67    0.19
  -2  -8  -3    1.51    0.24
   2   8   3    2.14    0.28
   2   8   3    1.87    0.25
  -2   8  -3    2.04    0.24
  -2   8  -3    2.30    0.25
   3  -8   3   -0.12    0.09
  -3  -8  -3    0.03    0.16
   3  -8   3   -0.06    0.09
  -3  -8  -3   -0.08    0.19
  -3   8  -3   -0.01    0.14
   3   8   3   -0.03    0.19
  -3   8  -3    0.12    0.13
   3   8   3    0.10    0.17
  -4  -8  -3    0.70    0.25
  -4  -8  -3    0.51    0.19
   4  -8   3    0.89    0.28
  -4   8  -3    0.69    0.18
   4   8   3    0.96    0.24
  -4   8  -3    0.66    0.19
   4   8   3    0.61    0.25
   5  -8   3    5.07    0.59
  -5  -8  -3    4.15    0.38
  -5   8  -3    4.35    0.40
   5   8   3    4.10    0.46
  -5   8  -3    4.33    0.36
   5   8   3    5.08    0.49
   6  -8   3    2.17    0.45
  -6  -8  -3    2.10    0.38
  -6  -8  -3    1.78    0.32
  -6  -8  -3    2.25    0.36
  -6   8  -3    1.61    0.26
   6   8   3    2.30    0.36
  -6   8  -3    1.61    0.31
   6   8   3    0.99    0.35
  -7  -8  -3    4.82    0.62
   7  -8   3    3.85    0.57
  -7   8  -3    3.53    0.44
  -7   8  -3    3.81    0.47
   7   8   3    4.25    0.57
  -8  -8  -3    2.20    0.47
  -8  -8  -3    1.05    0.44
  -8   8  -3    2.02    0.34
  -8   8  -3    1.20    0.50
   8   8   3    1.39    0.43
  -9  -8  -3    0.08    0.51
  -9  -8  -3    0.38    0.49
  -9   8  -3   -0.26    0.35
   9   8   3   -0.14    0.45
 -10   8  -3    0.80    0.47
  10   9  -3   -1.41    0.92
 -10   9   3   -0.09    0.44
  -9  -9   3    0.59    0.54
   9  -9  -3    1.07    0.33
   9   9  -3    0.60    0.50
  -9   9   3    1.29    0.38
   8  -9  -3    3.08    0.37
   8  -9  -3    4.09    0.50
  -8  -9   3    2.96    0.54
  -8   9   3    2.76    0.39
   8   9  -3    3.19    0.52
  -7  -9   3    0.84    0.38
   7  -9  -3    0.65    0.35
   7  -9  -3    0.21    0.24
  -7   9   3    0.51    0.27
   7   9  -3    0.24    0.33
  -6  -9   3    0.65    0.26
   6  -9  -3    1.36    0.33
  -6  -9   3    1.30    0.38
   6  -9  -3    1.17    0.24
   6   9  -3   -0.15    0.53
   6   9  -3    0.83    0.31
  -6   9   3    0.52    0.37
  -6   9   3    0.76    0.24
  -5  -9   3    0.21    0.19
   5  -9  -3    0.53    0.42
  -5  -9   3    0.20    0.27
   5  -9  -3    0.24    0.19
  -5  -9   3   -0.06    0.20
  -5   9   3    0.02    0.18
  -5   9   3   -0.10    0.27
   5   9  -3   -0.08    0.29
   5   9  -3    0.08    0.23
   4  -9  -3    2.17    0.27
   4  -9  -3    2.18    0.30
  -4  -9   3    1.26    0.31
  -4  -9   3    2.11    0.25
  -4  -9   3    1.82    0.21
  -4   9   3    2.05    0.30
   4   9  -3    1.95    0.29
   4   9  -3    1.74    0.31
  -4   9   3    2.63    0.33
   3  -9  -3   39.43    1.29
  -3  -9   3   39.02    1.22
   3  -9  -3   39.86    1.28
  -3  -9   3   41.80    1.35
   3   9  -3   39.93    1.35
   3   9  -3   37.95    1.29
  -3   9   3   40.17    1.27
  -3   9   3   40.92    1.32
   2  -9  -3   13.17    0.60
   2  -9  -3   13.43    0.60
  -2  -9   3   13.72    0.54
  -2  -9   3   14.07    0.62
   2   9  -3   14.18    0.64
  -2   9   3   14.12    0.63
   2   9  -3   12.43    0.57
   1  -9  -3    2.59    0.30
  -1  -9   3    2.03    0.25
   1  -9  -3    2.06    0.31
  -1  -9   3    3.01    0.33
  -1   9   3    2.48    0.34
   1   9  -3    2.26    0.27
  -1   9   3    2.29    0.28
   1   9  -3    2.37    0.27
   0  -9  -3    0.67    0.22
   0  -9   3    0.68    0.16
   0  -9   3    0.75    0.17
   0  -9  -3    0.55    0.20
   0   9  -3    0.67    0.15
   0   9   3    0.60    0.16
   0   9   3    0.66    0.19
   0   9  -3    0.55    0.18
   1  -9   3    1.54    0.19
  -1  -9  -3    1.44    0.24
  -1  -9  -3    1.58    0.22
   1  -9   3    1.37    0.19
  -1   9  -3    2.05    0.28
   1   9   3    1.46    0.21
   1   9   3    1.21    0.24
  -1   9  -3    1.34    0.18
   2  -9   3    0.22    0.13
   2  -9   3   -0.18    0.12
  -2  -9  -3    0.11    0.18
  -2  -9  -3    0.19    0.20
  -2   9  -3    0.13    0.16
   2   9   3    0.41    0.18
  -2   9  -3    0.19    0.15
   2   9   3    0.11    0.20
   3  -9   3    1.07    0.13
   3  -9   3    0.90    0.14
  -3  -9  -3    0.80    0.23
  -3  -9  -3    1.20    0.29
  -3   9  -3    1.01    0.19
  -3   9  -3    0.82    0.21
   3   9   3    1.13    0.27
   3   9   3    0.73    0.24
  -4  -9  -3    0.25    0.20
   4  -9   3    0.59    0.51
  -4  -9  -3    0.05    0.42
  -4   9  -3   -0.07    0.15
  -4   9  -3    0.25    0.22
   4   9   3   -0.34    0.26
   5  -9   3    0.99    0.38
  -5  -9  -3    0.81    0.32
  -5  -9  -3    0.98    0.25
   5   9   3    1.64    0.36
  -5   9  -3    1.13    0.21
  -5   9  -3    1.45    0.28
   5   9   3    1.65    0.33
   6  -9   3    3.80    0.54
  -6  -9  -3    2.93    0.49
  -6  -9  -3    3.06    0.42
  -6   9  -3    4.17    0.54
   6   9   3    3.19    0.42
  -6   9  -3    3.71    0.39
  -7  -9  -3    2.54    0.43
  -7  -9  -3    2.19    0.43
  -7   9  -3    2.49    0.47
  -8  -9  -3    1.12    0.47
  -8  -9  -3    1.10    0.49
  -8   9  -3    1.55    0.33
   8   9   3    0.63    0.42
  -9  -9  -3   -0.36    0.53
  -9  -9  -3   -0.48    0.52
  -9   9  -3    0.56    0.37
   9   9   3   -0.26    0.52
  -9 -10   3   -0.55    0.54
   9 -10  -3    0.25    0.36
   9  10  -3   -0.30    0.55
  -9  10   3    1.27    0.42
  -8 -10   3    2.13    0.53
   8 -10  -3    2.35    0.37
  -8  10   3    2.29    0.38
   8  10  -3    1.74    0.53
   7 -10  -3    1.92    0.32
  -7 -10   3    1.92    0.50
   7 -10  -3    2.24    0.44
   7  10  -3    2.13    0.47
  -7  10   3    1.70    0.33
  -6 -10   3    2.25    0.44
   6 -10  -3    2.66    0.40
  -6 -10   3    2.33    0.42
   6 -10  -3    2.50    0.32
   6  10  -3    1.99    0.39
  -6  10   3    1.96    0.31
  -5 -10   3    4.89    0.40
  -5 -10   3    4.51    0.56
   5 -10  -3    4.76    0.54
  -5 -10   3    3.89    0.43
   5 -10  -3    5.10    0.45
   5  10  -3    4.07    0.57
   5  10  -3    5.54    0.54
  -5  10   3    5.76    0.45
  -5  10   3    5.40    0.59
  -4 -10   3   -0.16    0.25
  -4 -10   3    0.20    0.21
  -4 -10   3    0.31    0.17
   4 -10  -3    0.00    0.20
   4 -10  -3    0.21    0.24
  -4  10   3    0.11    0.26
   4  10  -3    0.31    0.25
   4  10  -3    0.44    0.30
  -4  10   3    0.46    0.28
   3 -10  -3    1.00    0.23
  -3 -10   3    0.90    0.28
   3 -10  -3    0.45    0.24
   3  10  -3    0.97    0.29
  -3  10   3    0.71    0.21
  -3  10   3    0.89    0.27
   3  10  -3    0.97    0.24
  -2 -10   3    9.18    0.55
   2 -10  -3    9.72    0.53
   2 -10  -3    9.26    0.53
  -2 -10   3    9.38    0.45
  -2  10   3    9.61    0.49
   2  10  -3    9.05    0.49
   2  10  -3    9.40    0.57
  -2  10   3    9.94    0.57
   1 -10  -3    7.75    0.45
  -1 -10   3    7.02    0.46
   1 -10  -3    6.72    0.48
  -1  10   3    7.28    0.42
   1  10  -3    7.22    0.41
   1  10  -3    6.33    0.47
  -1  10   3    7.47    0.50
   0 -10  -3    2.58    0.28
   0 -10   3    2.20    0.27
   0 -10   3    2.16    0.27
   0 -10  -3    2.29    0.31
   0  10  -3    2.38    0.34
   0  10   3    2.77    0.39
   0  10   3    2.24    0.30
   0  10  -3    1.88    0.27
   1 -10   3    1.98    0.28
  -1 -10  -3    2.38    0.32
   1 -10   3    1.96    0.28
  -1 -10  -3    2.51    0.28
   1  10   3    3.27    0.40
   1  10   3    2.93    0.32
  -1  10  -3    2.42    0.34
  -1  10  -3    2.40    0.27
  -2 -10  -3    2.23    0.32
   2 -10   3    1.96    0.26
   2 -10   3    2.92    0.27
  -2 -10  -3    2.63    0.35
  -2  10  -3    2.25    0.28
  -2  10  -3    2.86    0.35
   2  10   3    2.65    0.34
   2  10   3    2.55    0.34
   3 -10   3    0.33    0.13
   3 -10   3    0.37    0.13
   3  10   3   -0.08    0.19
  -3  10  -3    0.34    0.21
   3  10   3    0.42    0.27
  -3  10  -3    0.04    0.16
   4 -10   3   -0.13    0.32
  -4 -10  -3    0.06    0.23
  -4 -10  -3    0.44    0.27
  -4  10  -3    0.06    0.23
   4  10   3    0.91    0.33
  -4  10  -3    0.11    0.17
   4  10   3    0.08    0.25
  -5 -10  -3    4.49    0.53
   5 -10   3    3.61    0.51
  -5  10  -3    4.22    0.39
   5  10   3    3.08    0.41
  -5  10  -3    4.24    0.51
  -6 -10  -3    3.10    0.44
   6 -10   3    3.98    0.59
  -6 -10  -3    3.64    0.55
   6  10   3    3.32    0.45
  -6  10  -3    3.87    0.47
  -6  10  -3    3.33    0.40
  -7 -10  -3    0.95    0.45
  -7 -10  -3    0.76    0.41
  -7  10  -3    1.69    0.56
  -7  10  -3    0.59    0.27
   7  10   3    0.47    0.38
  -8 -10  -3    0.68    0.50
  -8 -10  -3    0.08    0.51
   8  10   3    0.37    0.48
  -8  10  -3    0.03    0.31
   8 -11  -3    1.38    0.36
  -8 -11   3    0.51    0.55
   8  11  -3    1.21    0.50
  -8  11   3    0.77    0.36
  -7 -11   3    0.18    0.44
   7 -11  -3    0.29    0.46
   7 -11  -3    0.06    0.31
   7  11  -3   -0.16    0.38
  -7  11   3    0.41    0.30
   6 -11  -3    0.86    0.30
  -6 -11   3    1.20    0.42
   6 -11  -3    0.67    0.40
   6  11  -3    0.47    0.35
  -6  11   3    1.03    0.31
  -5 -11   3    0.42    0.35
  -5 -11   3    0.56    0.28
   5 -11  -3    0.87    0.27
  -5 -11   3    0.92    0.26
   5  11  -3    1.53    0.35
  -5  11   3    0.85    0.27
   4 -11  -3   -0.16    0.23
  -4 -11   3    0.16    0.18
   4 -11  -3    0.46    0.28
   4  11  -3    0.35    0.26
  -4  11   3   -0.12    0.22
  -4  11   3    0.82    0.34
  -3 -11   3    3.42    0.49
  -3 -11   3    3.27    0.36
   3 -11  -3    3.14    0.37
   3 -11  -3    3.31    0.43
   3  11  -3    3.04    0.42
   3  11  -3    3.02    0.44
  -3  11   3    3.43    0.51
   2 -11  -3    0.11    0.23
  -2 -11   3    0.32    0.18
   2 -11  -3    0.52    0.25
  -2 -11   3   -0.21    0.24
  -2  11   3    0.43    0.28
  -2  11   3   -0.05    0.17
   2  11  -3   -0.05    0.27
   2  11  -3    0.29    0.37
  -1 -11   3    0.55    0.19
   1 -11  -3    0.39    0.23
  -1 -11   3    0.09    0.23
   1 -11  -3    0.51    0.23
   1  11  -3    0.38    0.18
   1  11  -3    0.16    0.25
  -1  11   3    0.16    0.18
  -1  11   3   -0.04    0.25
   0 -11  -3   10.88    0.54
   0 -11   3    9.79    0.48
   0 -11  -3   10.12    0.60
   0 -11   3   10.26    0.53
   0  11  -3    9.65    0.58
   0  11  -3   10.16    0.50
   0  11   3   10.26    0.63
   0  11   3    9.61    0.52
   1 -11   3    7.71    0.44
  -1 -11  -3    7.03    0.46
  -1 -11  -3    6.65    0.55
   1 -11   3    7.63    0.41
   1  11   3    7.32    0.56
  -1  11  -3    6.83    0.51
   1  11   3    6.53    0.45
  -1  11  -3    7.46    0.41
  -2 -11  -3    0.07    0.20
   2 -11   3    0.01    0.17
   2 -11   3    0.35    0.18
  -2 -11  -3    0.07    0.26
  -2  11  -3    0.04    0.23
   2  11   3    0.25    0.21
  -2  11  -3   -0.06    0.15
   2  11   3   -0.42    0.29
   3 -11   3    0.12    0.14
  -3 -11  -3   -0.05    0.28
   3 -11   3    0.41    0.15
  -3 -11  -3    0.29    0.24
  -3  11  -3    0.24    0.25
   3  11   3   -0.12    0.23
  -4 -11  -3   -0.22    0.31
   4 -11   3    0.68    0.38
  -4  11  -3    0.24    0.20
  -4  11  -3    0.03    0.28
   4  11   3   -0.01    0.27
  -5 -11  -3    0.83    0.41
   5 -11   3    1.39    0.50
   5  11   3    1.08    0.36
  -5  11  -3    1.13    0.37
  -6 -11  -3    0.83    0.45
  -6 -11  -3    0.48    0.43
   6  11   3    1.04    0.38
  -6  11  -3    0.24    0.25
  -6  11  -3    0.16    0.44
  -7 -11  -3    1.04    0.44
  -7 -11  -3    0.42    0.48
  -7  11  -3    0.95    0.31
   7  11   3    0.25    0.44
  -8 -11  -3    0.68    0.56
  -8 -11  -3    0.55    0.69
  -8  11  -3    0.11    0.35
   8  11   3   -0.88    0.52
  -8 -12   3    1.09    0.65
  -8  12   3    0.11    0.40
  -7 -12   3    1.41    0.54
   7 -12  -3    0.03    0.34
  -7  12   3    0.46    0.32
   7  12  -3   -0.82    0.42
   6 -12  -3    0.76    0.45
  -6 -12   3   -0.34    0.43
   6 -12  -3    0.21    0.32
   6  12  -3   -0.44    0.39
  -6  12   3    0.44    0.31
   5 -12  -3    0.59    0.39
  -5 -12   3    0.88    0.42
   5 -12  -3    0.43    0.30
  -5 -12   3    0.27    0.28
  -5  12   3    0.41    0.28
   5  12  -3    0.61    0.37
   4 -12  -3    0.30    0.28
  -4 -12   3    0.71    0.29
  -4 -12   3    0.76    0.22
   4 -12  -3    1.32    0.37
  -4 -12   3    0.69    0.37
  -4  12   3    0.74    0.26
   4  12  -3    0.64    0.33
  -3 -12   3    0.05    0.17
   3 -12  -3    0.03    0.27
  -3 -12   3    0.30    0.33
  -3 -12   3   -0.04    0.23
   3 -12  -3    0.40    0.29
  -3  12   3   -0.07    0.20
   3  12  -3    0.00    0.27
  -2 -12   3    0.29    0.22
   2 -12  -3   -0.16    0.26
  -2 -12   3    0.16    0.28
   2 -12  -3    0.50    0.27
   2  12  -3   -0.51    0.30
  -2  12   3   -0.10    0.18
   1 -12  -3    0.32    0.28
   1 -12  -3    0.76    0.27
  -1 -12   3    0.46    0.27
  -1 -12   3    0.30    0.37
  -1  12   3    0.16    0.18
   1  12  -3    0.97    0.34
   1  12  -3    0.67    0.23
   0 -12   3    0.77    0.26
   0 -12   3    1.29    0.23
   0 -12  -3    0.87    0.27
   0 -12  -3    0.88    0.33
   0  12  -3    0.61    0.30
   0  12   3    0.81    0.23
   0  12  -3    0.77    0.23
   1 -12   3    0.54    0.21
  -1 -12  -3    0.16    0.30
  -1 -12  -3    0.25    0.25
   1 -12   3    0.13    0.22
   1  12   3   -0.05    0.20
  -1  12  -3   -0.09    0.28
   2 -12   3    1.37    0.23
   2 -12   3    1.68    0.24
  -2 -12  -3    0.79    0.34
  -2 -12  -3    1.77    0.31
  -2  12  -3    1.50    0.32
   2  12   3    1.19    0.27
  -3 -12  -3    0.26    0.35
  -3  12  -3   -0.51    0.30
  -3  12  -3    0.24    0.23
   4 -12   3    0.65    0.45
  -4 -12  -3   -0.33    0.36
  -4  12  -3    0.77    0.25
   4  12   3    0.19    0.32
  -4  12  -3    0.76    0.36
   5 -12   3    0.66    0.58
  -5 -12  -3    0.64    0.42
  -5  12  -3    0.69    0.25
   5  12   3    0.66    0.39
  -6 -12  -3    0.77    0.50
  -6 -12  -3    0.12    0.41
  -6  12  -3    0.33    0.27
   6  12   3    0.98    0.45
  -7 -12  -3    0.83    0.50
  -7 -12  -3    1.02    0.62
   7  12   3    1.90    0.55
  -7  12  -3    0.98    0.34
  -7 -13   3    1.47    0.62
  -7  13   3    0.44    0.36
  -6 -13   3    0.09    0.51
   6  13  -3   -0.08    0.46
  -6  13   3    0.13    0.34
   5 -13  -3    0.20    0.49
  -5 -13   3    0.28    0.44
  -5  13   3    0.35    0.30
   5  13  -3    0.13    0.40
   4 -13  -3    1.06    0.43
  -4 -13   3    0.28    0.39
   4 -13  -3    0.53    0.47
  -4 -13   3    0.60    0.24
   4  13  -3   -0.14    0.34
  -4  13   3    0.16    0.26
   3 -13  -3   -0.20    0.34
  -3 -13   3    0.19    0.29
  -3 -13   3   -0.27    0.19
   3 -13  -3    0.03    0.34
  -3 -13   3   -0.07    0.35
   3  13  -3    0.12    0.32
  -3  13   3   -0.30    0.22
   2 -13  -3    1.09    0.35
   2 -13  -3    1.01    0.33
  -2 -13   3    0.44    0.33
  -2 -13   3    0.72    0.27
  -2  13   3    0.47    0.25
   2  13  -3    0.65    0.28
  -1 -13   3    0.76    0.27
   1 -13  -3    0.97    0.33
  -1 -13   3    0.58    0.31
   1 -13  -3    0.57    0.33
  -1  13   3    0.33    0.24
   1  13  -3    0.46    0.25
   0 -13   3   -0.09    0.28
   0 -13   3    0.40    0.26
   0 -13  -3   -0.74    0.29
   0 -13  -3    0.14    0.29
   0  13   3   -0.35    0.21
   0  13  -3   -0.18    0.21
   1 -13   3    2.33    0.33
   1 -13   3    2.84    0.42
  -1 -13  -3    2.19    0.41
  -1  13  -3    1.88    0.28
   1  13   3    2.12    0.32
   2 -13   3    2.61    0.29
  -2 -13  -3    2.43    0.45
   2 -13   3    2.47    0.28
   2  13   3    2.10    0.35
  -2  13  -3    1.76    0.27
   3 -13   3    0.16    0.44
  -3 -13  -3    0.08    0.40
  -3  13  -3    0.08    0.21
   3  13   3   -0.14    0.30
   4 -13   3   -0.34    0.51
  -4 -13  -3   -0.56    0.42
  -4  13  -3    0.00    0.24
   4  13   3   -0.33    0.35
  -5 -13  -3    0.97    0.50
   5  13   3    1.80    0.48
  -5  13  -3    0.67    0.31
  -6 -13  -3   -1.12    0.51
  -6 -13  -3    0.38    0.46
   6  13   3   -0.27    0.50
  -6  13  -3    0.31    0.33
   5 -14  -3   -0.14    0.43
  -5 -14   3    0.19    0.52
  -5  14   3   -0.37    0.33
   5  14  -3   -0.37    0.47
   4 -14  -3   -0.13    0.39
  -4 -14   3    1.14    0.49
  -4  14   3   -0.06    0.31
   4  14  -3    0.48    0.44
  -3 -14   3    0.46    0.34
  -3 -14   3    0.33    0.41
   3 -14  -3    0.48    0.45
   3 -14  -3    0.74    0.38
   3  14  -3   -0.12    0.35
  -2 -14   3    1.92    0.45
   2 -14  -3    1.94    0.46
  -2 -14   3    1.95    0.36
   2 -14  -3    1.43    0.42
   2  14  -3    1.13    0.36
   1 -14  -3   -0.05    0.35
  -1 -14   3    0.08    0.35
  -1 -14   3   -0.26    0.30
   1  14  -3    0.01    0.27
  -1  14   3   -0.11    0.25
   0 -14   3    0.13    0.34
   0 -14  -3    0.03    0.37
   0  14   3    0.12    0.27
   0  14  -3   -0.16    0.24
  -1 -14  -3   -0.20    0.38
   1 -14   3    0.55    0.31
   1  14   3   -0.22    0.28
  -1  14  -3   -0.33    0.23
   2 -14   3    0.59    0.28
  -2 -14  -3    0.63    0.43
   2  14   3    0.35    0.34
  -2  14  -3    0.08    0.24
  -3 -14  -3   -0.62    0.45
   3  14   3   -0.27    0.35
  -3  14  -3    0.06    0.25
   4  14   3    0.90    0.46
  -4  14  -3    0.48    0.28
  -5 -14  -3    1.78    0.63
   4 -15  -3    1.22    0.51
   4  15  -3    0.69    0.75
  -4  15   3    0.69    0.37
  -3 -15   3    0.04    0.51
   3 -15  -3    0.75    0.45
  -3  15   3    0.59    0.34
   3  15  -3    0.32    0.43
  -2 -15   3    2.31    0.50
   2  15  -3    0.77    0.41
  -2  15   3    0.67    0.32
   1 -15  -3    0.29    0.44
  -1 -15   3   -0.29    0.44
   1  15  -3   -0.32    0.32
  -1  15   3   -0.19    0.31
   0 -15   3    2.01    0.45
   0 -15  -3    0.83    0.45
   0  15   3    0.87    0.36
   0  15  -3    2.04    0.38
  -1 -15  -3   -0.40    0.45
   1  15   3   -0.65    0.34
  -1  15  -3   -0.38    0.29
  -2 -15  -3    0.02    0.50
   2  15   3    0.23    0.39
  -3 -15  -3    0.59    0.56
  -3  15  -3    0.24    0.29
 -12   0   4    0.90    0.64
  12   0  -4    0.13    0.51
 -11   0   4    2.05    0.50
  11   0  -4    1.93    0.46
 -10   0   4    4.18    0.55
  10   0  -4    4.74    0.52
  10   0  -4    6.32    0.75
   9   0  -4    3.42    0.67
   9   0  -4    3.29    0.54
   9   0  -4    4.07    0.50
  -9   0   4    2.38    0.47
  -9   0   4    4.40    0.57
   8   0  -4   15.43    0.74
  -8   0   4   14.96    0.78
   8   0  -4   14.89    0.81
   8   0  -4   14.37    0.77
  -8   0   4   15.96    0.79
  -7   0   4    0.42    0.24
   7   0  -4    0.45    0.32
  -7   0   4    0.56    0.26
   7   0  -4    0.84    0.24
   7   0  -4    0.55    0.32
   6   0  -4    0.05    0.16
  -6   0   4   -0.29    0.19
   6   0  -4    0.02    0.20
   6   0  -4   -0.12    0.17
   5   0  -4    0.72    0.17
  -5   0   4    0.95    0.19
  -5   0   4    0.87    0.21
   5   0  -4    0.47    0.18
   4   0  -4    3.84    0.28
  -4   0   4    3.46    0.28
  -4   0   4    3.58    0.27
   4   0  -4    4.01    0.28
  -3   0   4   -0.04    0.09
   3   0  -4    0.01    0.11
   3   0  -4   -0.16    0.11
  -3   0   4   -0.02    0.10
  -2   0   4    4.15    0.23
   2   0  -4    4.46    0.24
  -2   0   4    4.00    0.23
   2   0  -4    4.25    0.23
   1   0  -4    2.82    0.16
  -1   0   4    2.72    0.16
  -1   0   4    2.82    0.15
   1   0  -4    2.65    0.16
   0   0  -4   -0.02    0.05
   0   0   4   -0.04    0.04
  -1   0  -4  123.21    3.22
  -1   0  -4  120.72    3.22
  -2   0  -4  352.75    9.77
   2   0   4  379.18    9.76
  -2   0  -4  386.77    9.91
   2   0   4  366.40    9.74
  -3   0  -4   88.52    2.50
   3   0   4   88.62    2.38
   3   0   4   88.81    2.37
  -3   0  -4   90.76    2.42
  -3   0  -4   86.11    2.41
   4   0   4   88.40    2.43
   4   0   4   88.06    2.41
  -4   0  -4   92.29    2.48
  -4   0  -4   88.58    2.47
  -4   0  -4   87.92    2.56
  -5   0  -4    5.17    0.33
   5   0   4    5.03    0.28
   5   0   4    4.97    0.26
  -5   0  -4    4.85    0.42
  -5   0  -4    4.88    0.33
  -6   0  -4    0.39    0.20
   6   0   4    0.52    0.14
  -6   0  -4    0.54    0.20
   6   0   4    0.45    0.15
  -6   0  -4    0.63    0.26
  -7   0  -4    4.14    0.44
   7   0   4    4.41    0.32
  -7   0  -4    4.18    0.50
   7   0   4    4.92    0.34
  -8   0  -4    0.63    0.32
  -8   0  -4    0.02    0.27
   8   0   4    0.50    0.20
   8   0   4    0.10    0.20
  -9   0  -4    1.81    0.39
  -9   0  -4    2.16    0.45
   9   0   4    1.82    0.29
 -10   0  -4    1.44    0.45
  10   0   4    0.18    0.30
  10   0   4    0.44    0.28
 -11   0  -4    0.48    0.54
  12  -1  -4    5.86    0.79
 -12  -1   4    4.42    1.07
  12   1  -4    3.61    0.62
 -12   1   4    2.72    0.72
  11  -1  -4    2.21    0.45
 -11  -1   4    1.91    0.51
  11   1  -4    1.89    0.49
 -11   1   4    2.66    0.55
  10  -1  -4    0.52    0.35
  10  -1  -4    1.02    0.47
 -10  -1   4    0.99    0.41
  10   1  -4    0.97    0.38
 -10   1   4    0.61    0.37
  -9  -1   4    0.43    0.37
   9  -1  -4    0.79    0.41
   9  -1  -4   -0.15    0.35
   9  -1  -4    0.68    0.41
  -9  -1   4    0.52    0.34
   9   1  -4    0.59    0.40
  -9   1   4    0.97    0.38
   9   1  -4    0.39    0.36
  -9   1   4    0.77    0.34
   9   1  -4    0.50    0.30
   8  -1  -4   -0.10    0.34
  -8  -1   4    0.50    0.30
   8  -1  -4   -0.05    0.28
  -8  -1   4    0.07    0.26
   8  -1  -4    0.11    0.24
  -8   1   4    0.12    0.27
  -8   1   4   -0.07    0.29
   8   1  -4    0.26    0.31
   8   1  -4    0.17    0.28
   8   1  -4    0.06    0.26
  -7  -1   4    4.06    0.46
   7  -1  -4    4.14    0.48
   7  -1  -4    4.12    0.62
   7  -1  -4    4.17    0.40
  -7  -1   4    4.22    0.46
  -7   1   4    4.28    0.46
   7   1  -4    4.77    0.55
   7   1  -4    4.11    0.47
   7   1  -4    4.22    0.43
  -7   1   4    3.85    0.44
  -6  -1   4    0.46    0.23
   6  -1  -4    0.37    0.19
  -6  -1   4    0.62    0.21
   6  -1  -4    0.96    0.23
  -6   1   4    0.69    0.23
   6   1  -4    0.82    0.21
   6   1  -4    0.51    0.23
  -6   1   4    0.59    0.19
  -5  -1   4   12.74    0.57
   5  -1  -4   13.34    0.57
  -5  -1   4   12.78    0.55
   5  -1  -4   11.97    0.54
   5   1  -4   13.97    0.58
  -5   1   4   13.26    0.56
   5   1  -4   12.29    0.55
  -5   1   4   13.13    0.57
   5   1  -4   12.53    0.55
   4  -1  -4    0.13    0.13
  -4  -1   4    0.29    0.13
   4  -1  -4    0.36    0.13
  -4  -1   4    0.47    0.16
   4   1  -4    0.26    0.13
  -4   1   4    0.33    0.14
   4   1  -4    0.36    0.13
  -4   1   4    0.35    0.15
  -3  -1   4   24.49    0.79
   3  -1  -4   25.80    0.81
  -3  -1   4   24.64    0.80
   3  -1  -4   25.89    0.80
   3   1  -4   26.15    0.81
  -3   1   4   24.56    0.80
   3   1  -4   24.59    0.80
  -3   1   4   25.13    0.79
  -2  -1   4   11.87    0.40
  -2  -1   4   11.29    0.41
   2  -1  -4   11.99    0.42
   2  -1  -4   11.54    0.42
   2   1  -4   11.32    0.41
  -2   1   4   11.46    0.42
   2   1  -4   10.94    0.41
  -2   1   4   11.47    0.41
  -1  -1   4  131.76    3.51
   1  -1  -4  128.14    3.54
   1  -1  -4  131.98    3.52
  -1   1   4  131.49    3.52
   1   1  -4  134.78    3.52
  -1   1   4  136.43    3.54
   1   1  -4  131.98    3.53
   0  -1  -4    0.23    0.07
   0   1   4    0.40    0.06
   0   1   4    0.23    0.06
  -1  -1  -4   43.37    1.15
  -1  -1  -4   39.77    1.13
   1   1   4   41.84    1.15
   1   1   4   41.27    1.14
  -2  -1  -4  198.04    5.25
  -2  -1  -4  191.57    5.25
  -2   1  -4  206.35    5.32
   2   1   4  197.38    5.23
   2   1   4  197.30    5.24
  -2   1  -4  191.92    5.21
  -2   1  -4  201.89    5.21
  -3  -1  -4   -0.04    0.08
  -3  -1  -4   -0.11    0.12
  -3  -1  -4    0.14    0.08
  -3   1  -4    0.07    0.08
   3   1   4    0.11    0.07
  -3   1  -4    0.03    0.08
  -3   1  -4    0.20    0.14
   3   1   4   -0.02    0.09
  -4  -1  -4   32.11    1.07
   4  -1   4   32.33    0.90
  -4  -1  -4   33.81    1.01
   4  -1   4   31.22    0.89
  -4  -1  -4   32.04    0.99
  -4   1  -4   31.73    0.98
   4   1   4   31.48    0.95
  -4   1  -4   31.96    0.97
   4   1   4   31.31    0.97
  -4   1  -4   32.30    1.08
  -5  -1  -4    3.13    0.29
   5  -1   4    2.98    0.20
  -5  -1  -4    2.56    0.36
  -5  -1  -4    3.00    0.30
   5  -1   4    3.02    0.19
  -5   1  -4    3.05    0.28
  -5   1  -4    2.79    0.35
   5   1   4    2.88    0.26
  -5   1  -4    2.91    0.28
   5   1   4    3.18    0.24
  -6  -1  -4    0.58    0.20
   6  -1   4    0.87    0.14
   6  -1   4    0.70    0.14
  -6  -1  -4    0.86    0.27
  -6  -1  -4    0.76    0.22
   6   1   4    0.67    0.17
  -6   1  -4    0.54    0.32
   6   1   4    0.94    0.19
  -6   1  -4    0.76    0.22
  -7  -1  -4    0.81    0.27
  -7  -1  -4    0.80    0.26
   7  -1   4    0.97    0.16
   7  -1   4    0.86    0.16
  -7  -1  -4    0.56    0.28
   7   1   4    0.77    0.20
   7   1   4    0.92    0.22
  -7   1  -4    0.17    0.23
  -7   1  -4    1.08    0.33
  -8  -1  -4   -0.02    0.31
  -8  -1  -4    0.23    0.28
   8  -1   4    0.12    0.18
   8  -1   4    0.33    0.17
   8   1   4    0.14    0.22
  -8   1  -4    0.65    0.29
  -8   1  -4    0.50    0.31
   8   1   4    0.14    0.23
  -9  -1  -4    0.65    0.35
   9  -1   4    1.18    0.24
  -9  -1  -4    1.51    0.48
   9  -1   4    1.53    0.23
  -9   1  -4    1.28    0.35
  -9   1  -4    1.50    0.44
   9   1   4    0.79    0.28
   9   1   4    1.15    0.29
  10  -1   4    0.29    0.24
 -10  -1  -4    0.90    0.44
  10  -1   4   -0.13    0.41
  10   1   4    0.65    0.34
  10   1   4    1.18    0.36
 -10   1  -4    0.22    0.40
 -11  -1  -4    0.05    0.53
 -11   1  -4    0.27    0.52
  11   1   4    1.02    0.40
  12  -2  -4    1.91    0.51
  12   2  -4    2.21    0.61
 -12   2   4    1.70    0.78
 -11  -2   4    1.58    0.53
  11  -2  -4    2.68    0.46
 -11   2   4    2.61    0.56
  11   2  -4    1.84    0.49
 -10  -2   4    0.56    0.37
  10  -2  -4   -0.22    0.44
  10  -2  -4   -0.44    0.30
 -10   2   4    0.17    0.37
  10   2  -4    0.19    0.38
   9  -2  -4    0.78    0.37
   9  -2  -4    1.78    0.49
  -9  -2   4    1.39    0.39
   9  -2  -4    1.23    0.32
   9   2  -4    0.49    0.41
   9   2  -4    1.16    0.40
   9   2  -4    0.90    0.34
  -9   2   4    1.49    0.38
  -9   2   4    0.91    0.39
   8  -2  -4    2.64    0.37
  -8  -2   4    2.12    0.44
   8  -2  -4    2.30    0.32
  -8  -2   4    2.32    0.37
   8  -2  -4    2.57    0.46
  -8   2   4    2.37    0.38
   8   2  -4    2.15    0.37
  -8   2   4    2.53    0.37
   8   2  -4    2.27    0.39
   8   2  -4    2.39    0.37
  -7  -2   4    0.52    0.25
   7  -2  -4   -0.38    0.27
  -7  -2   4    0.11    0.24
   7  -2  -4    0.26    0.26
   7  -2  -4    0.01    0.20
  -7   2   4    0.26    0.25
   7   2  -4    0.42    0.25
   7   2  -4    0.22    0.21
  -7   2   4   -0.07    0.24
   7   2  -4    0.01    0.23
   6  -2  -4    0.59    0.23
  -6  -2   4    0.49    0.20
   6  -2  -4    0.37    0.18
  -6  -2   4    0.11    0.22
  -6   2   4    0.16    0.20
   6   2  -4    0.36    0.21
   6   2  -4    0.63    0.23
  -6   2   4    0.79    0.24
   6   2  -4    0.39    0.22
   5  -2  -4    0.30    0.17
  -5  -2   4    0.62    0.20
  -5  -2   4    0.36    0.16
   5  -2  -4    0.53    0.15
  -5   2   4    0.73    0.20
  -5   2   4    0.76    0.19
   5   2  -4    0.62    0.17
   5   2  -4    0.70    0.22
   5   2  -4    0.42    0.17
   4  -2  -4   49.09    1.46
  -4  -2   4   49.61    1.49
  -4  -2   4   51.99    1.47
   4  -2  -4   48.22    1.48
   4   2  -4   49.01    1.49
  -4   2   4   52.34    1.48
   4   2  -4   46.25    1.47
  -4   2   4   50.61    1.49
   4   2  -4   48.36    1.45
   3  -2  -4   15.92    0.57
  -3  -2   4   15.60    0.57
  -3  -2   4   16.09    0.55
   3  -2  -4   16.40    0.56
   3   2  -4   16.07    0.53
  -3   2   4   15.87    0.57
   3   2  -4   16.15    0.58
   3   2  -4   15.93    0.57
   2  -2  -4   11.95    0.43
   2  -2  -4   11.66    0.43
  -2  -2   4   11.83    0.40
  -2  -2   4   11.44    0.43
   2   2  -4   11.98    0.42
  -2   2   4   11.91    0.43
  -2   2   4   12.38    0.43
   2   2  -4   12.15    0.44
  -1  -2   4   45.24    1.22
   1  -2  -4   46.85    1.27
   1  -2  -4   45.25    1.26
  -1   2   4   44.70    1.25
  -1   2   4   44.28    1.27
   1   2  -4   45.81    1.26
   1   2  -4   43.63    1.24
   0  -2  -4   27.46    0.79
   0  -2  -4   26.81    0.78
   0   2  -4   27.24    0.73
   0   2   4   27.22    0.77
   0   2   4   27.22    0.79
  -1  -2  -4   16.55    0.48
  -1  -2  -4   16.11    0.50
  -1   2  -4   16.37    0.52
   1   2   4   15.23    0.48
   1   2   4   15.16    0.49
  -2  -2  -4    1.96    0.16
  -2  -2  -4    1.69    0.16
   2   2   4    1.80    0.15
   2   2   4    1.81    0.15
  -2   2  -4    1.81    0.08
  -2   2  -4    1.81    0.09
  -2   2  -4    2.07    0.21
   3  -2   4   14.94    0.56
  -3  -2  -4   14.35    0.50
  -3  -2  -4   14.58    0.52
  -3   2  -4   14.25    0.46
   3   2   4   14.40    0.51
  -3   2  -4   14.42    0.47
  -3   2  -4   14.73    0.57
   3   2   4   14.75    0.49
  -4  -2  -4   86.78    2.47
   4  -2   4   84.76    2.45
  -4  -2  -4   85.21    2.38
  -4  -2  -4   85.72    2.41
   4   2   4   82.35    2.39
   4   2   4   85.06    2.37
  -4   2  -4   84.60    2.36
  -4   2  -4   88.28    2.36
   5  -2   4   28.51    0.79
   5  -2   4   27.48    1.00
  -5  -2  -4   28.51    0.96
  -5  -2  -4   28.40    0.98
  -5  -2  -4   27.05    1.01
   5  -2   4   27.26    0.79
   5   2   4   27.43    0.92
   5   2   4   28.08    0.89
  -5   2  -4   27.88    0.91
  -5   2  -4   28.05    0.91
   6  -2   4    2.22    0.18
  -6  -2  -4    2.41    0.30
  -6  -2  -4    2.92    0.43
  -6  -2  -4    2.41    0.34
   6  -2   4    1.93    0.17
   6   2   4    2.53    0.29
   6   2   4    2.44    0.31
  -6   2  -4    2.32    0.33
  -6   2  -4    2.19    0.28
  -7  -2  -4    0.89    0.29
   7  -2   4    1.31    0.19
  -7  -2  -4    0.95    0.28
   7  -2   4    1.16    0.15
  -7  -2  -4    1.28    0.29
  -7   2  -4    1.15    0.26
   7   2   4    1.51    0.24
   7   2   4    1.48    0.25
  -7   2  -4    1.02    0.28
   8  -2   4    0.47    0.16
  -8  -2  -4    0.82    0.45
   8  -2   4    0.61    0.15
  -8  -2  -4    0.63    0.33
  -8   2  -4    1.02    0.30
   8   2   4    0.60    0.26
   8   2   4    0.57    0.25
  -8   2  -4    0.04    0.31
   9  -2   4    0.33    0.17
  -9  -2  -4    0.85    0.39
   9  -2   4    0.36    0.19
   9   2   4    0.60    0.31
  -9   2  -4    0.60    0.42
  -9   2  -4    0.11    0.31
   9   2   4   -0.06    0.29
  10  -2   4    2.35    0.32
 -10  -2  -4    2.71    0.51
  10   2   4    2.91    0.42
 -10   2  -4    2.10    0.46
  10   2   4    2.55    0.42
 -11  -2  -4    0.28    0.53
 -11   2  -4    1.13    0.54
  11  -3  -4    0.04    0.39
 -11  -3   4    1.05    0.51
  11   3  -4    0.08    0.47
 -11   3   4    0.67    0.47
 -10  -3   4    0.95    0.41
  10  -3  -4   -0.10    0.30
  10  -3  -4   -0.12    0.47
  10   3  -4    0.06    0.38
 -10   3   4    0.76    0.37
   9  -3  -4    0.28    0.35
  -9  -3   4    0.09    0.32
   9  -3  -4    0.02    0.26
   9   3  -4   -0.13    0.30
   9   3  -4   -0.79    0.36
  -9   3   4    0.82    0.34
  -9   3   4    0.13    0.48
   8  -3  -4    3.52    0.52
  -8  -3   4    2.23    0.38
   8  -3  -4    2.43    0.38
   8  -3  -4    1.90    0.31
  -8  -3   4    1.58    0.43
  -8   3   4    2.26    0.42
  -8   3   4    2.17    0.37
   8   3  -4    2.01    0.40
   8   3  -4    2.35    0.42
   7  -3  -4    1.18    0.47
  -7  -3   4    0.75    0.27
   7  -3  -4    1.18    0.24
  -7  -3   4    0.77    0.27
  -7   3   4    1.40    0.30
   7   3  -4    1.42    0.32
  -7   3   4    1.72    0.33
   7   3  -4    1.52    0.29
   7   3  -4    1.35    0.30
   6  -3  -4    2.81    0.31
  -6  -3   4    2.38    0.33
   6  -3  -4    2.48    0.31
  -6  -3   4    2.17    0.29
   6   3  -4    3.01    0.35
   6   3  -4    3.01    0.41
  -6   3   4    2.69    0.37
  -6   3   4    3.26    0.38
   6   3  -4    2.35    0.30
   5  -3  -4   16.43    0.63
  -5  -3   4   16.67    0.69
   5  -3  -4   15.39    0.66
  -5  -3   4   15.35    0.74
  -5   3   4   17.22    0.67
   5   3  -4   16.16    0.67
   5   3  -4   16.86    0.63
  -5   3   4   16.22    0.77
   5   3  -4   18.37    0.71
  -4  -3   4   42.46    1.29
   4  -3  -4   41.21    1.27
  -4  -3   4   42.00    1.25
   4  -3  -4   40.94    1.25
   4   3  -4   42.25    1.29
   4   3  -4   41.39    1.22
   4   3  -4   41.17    1.28
  -4   3   4   38.61    1.25
  -4   3   4   41.67    1.28
  -3  -3   4    9.25    0.38
   3  -3  -4    9.81    0.40
   3  -3  -4    9.77    0.42
  -3  -3   4    9.89    0.43
   3   3  -4   10.09    0.43
   3   3  -4    9.78    0.36
  -3   3   4   10.24    0.42
  -3   3   4    9.71    0.41
   3   3  -4   10.18    0.42
  -2  -3   4    4.57    0.26
  -2  -3   4    5.07    0.22
   2  -3  -4    4.70    0.27
   2  -3  -4    5.32    0.26
  -2   3   4    5.06    0.26
  -2   3   4    5.02    0.27
   2   3  -4    5.13    0.27
   2   3  -4    5.06    0.18
   1  -3  -4   14.16    0.46
  -1  -3   4   13.70    0.41
  -1  -3   4   13.84    0.44
   1  -3  -4   13.34    0.47
  -1   3   4   13.97    0.46
   1   3  -4   14.62    0.46
  -1   3   4   13.72    0.47
   1   3  -4   14.59    0.43
   0  -3  -4    9.76    0.35
   0  -3  -4   10.22    0.37
   0   3  -4    9.77    0.31
   0   3   4    9.60    0.36
   0   3  -4    9.64    0.29
   0   3   4    9.84    0.34
  -1  -3  -4    5.94    0.27
   1  -3   4    5.73    0.25
  -1  -3  -4    5.80    0.24
   1   3   4    5.91    0.24
   1   3   4    5.73    0.26
   2  -3   4    0.67    0.14
  -2  -3  -4    0.64    0.12
  -2  -3  -4    0.68    0.10
  -2   3  -4    0.60    0.09
   2   3   4    0.75    0.11
   2   3   4    0.55    0.11
  -2   3  -4    0.71    0.07
  -3  -3  -4    2.90    0.22
   3  -3   4    2.73    0.27
  -3  -3  -4    3.00    0.24
   3   3   4    2.85    0.23
   3   3   4    2.92    0.22
  -3   3  -4    2.77    0.18
  -3   3  -4    2.93    0.16
  -4  -3  -4    2.85    0.28
  -4  -3  -4    3.18    0.26
   4  -3   4    2.90    0.32
  -4   3  -4    2.85    0.22
   4   3   4    2.96    0.26
   4   3   4    2.72    0.24
  -4   3  -4    3.11    0.23
  -5  -3  -4    0.60    0.18
  -5  -3  -4    0.32    0.17
  -5  -3  -4    0.72    0.21
   5  -3   4    0.02    0.21
   5   3   4    0.28    0.15
  -5   3  -4    0.56    0.17
  -5   3  -4    0.50    0.15
   5   3   4    0.39    0.18
  -6  -3  -4    1.76    0.33
  -6  -3  -4    2.87    0.38
   6  -3   4    2.57    0.38
  -6  -3  -4    2.60    0.38
  -6   3  -4    2.21    0.28
  -6   3  -4    2.11    0.27
   6   3   4    2.29    0.29
   6   3   4    2.13    0.31
  -7  -3  -4    2.49    0.35
   7  -3   4    2.42    0.16
  -7  -3  -4    2.96    0.43
  -7  -3  -4    3.36    0.50
   7  -3   4    2.18    0.17
   7  -3   4    2.43    0.38
   7   3   4    3.34    0.40
  -7   3  -4    2.46    0.31
  -7   3  -4    3.12    0.42
   7   3   4    2.57    0.37
   8  -3   4    0.92    0.12
  -8  -3  -4    0.90    0.35
  -8  -3  -4   -0.03    0.30
  -8  -3  -4    0.28    0.30
   8   3   4    1.11    0.30
   8   3   4    0.95    0.29
  -8   3  -4    0.47    0.28
  -8   3  -4    1.16    0.35
  -9  -3  -4    0.92    0.38
   9   3   4    1.23    0.35
   9   3   4    0.65    0.35
  -9   3  -4    0.81    0.46
  -9   3  -4    0.52    0.33
 -10  -3  -4    3.63    0.61
  10   3   4    2.82    0.62
  10   3   4    3.74    0.50
 -10   3  -4    3.63    0.52
 -11  -3  -4    1.29    0.60
 -11   3  -4    0.34    0.52
  11   3   4    1.53    0.51
  11  -4  -4    0.42    0.39
 -11  -4   4    1.03    0.54
  11   4  -4   -0.52    0.51
 -11   4   4    0.82    0.46
  10  -4  -4    2.34    0.53
 -10  -4   4    2.87    0.53
  10  -4  -4    1.45    0.35
 -10   4   4    1.97    0.43
  10   4  -4    2.10    0.46
  -9  -4   4    1.68    0.42
   9  -4  -4    0.68    0.29
   9  -4  -4    0.83    0.40
  -9   4   4    1.18    0.35
   9   4  -4    0.74    0.34
  -8  -4   4   -0.08    0.28
   8  -4  -4   -0.41    0.39
   8  -4  -4    0.15    0.23
  -8  -4   4   -0.07    0.30
   8  -4  -4    0.28    0.28
   8   4  -4    0.33    0.28
   8   4  -4    0.46    0.33
  -8   4   4    0.54    0.42
  -8   4   4   -0.14    0.35
   7  -4  -4    0.05    0.19
  -7  -4   4    0.10    0.25
   7  -4  -4    0.47    0.46
  -7  -4   4   -0.28    0.22
  -7   4   4   -0.10    0.28
   7   4  -4   -0.51    0.24
   7   4  -4   -0.34    0.21
  -7   4   4    0.08    0.24
   6  -4  -4    1.90    0.29
   6  -4  -4    1.78    0.25
  -6  -4   4    1.88    0.26
  -6  -4   4    2.63    0.35
  -6   4   4    2.24    0.38
  -6   4   4    2.22    0.32
   6   4  -4    2.25    0.30
   6   4  -4    2.50    0.37
  -5  -4   4    0.17    0.19
   5  -4  -4    0.04    0.14
   5  -4  -4   -0.14    0.18
  -5  -4   4    0.37    0.17
  -5   4   4    0.05    0.17
  -5   4   4    0.06    0.18
   5   4  -4    0.01    0.18
   5   4  -4    0.39    0.18
  -4  -4   4   -0.05    0.12
   4  -4  -4   -0.01    0.12
  -4  -4   4    0.03    0.14
  -4   4   4   -0.03    0.14
   4   4  -4    0.06    0.14
   4   4  -4    0.23    0.14
  -4   4   4   -0.06    0.13
  -3  -4   4   18.51    0.61
  -3  -4   4   18.98    0.67
   3  -4  -4   19.27    0.64
   3  -4  -4   19.00    0.66
   3   4  -4   18.70    0.67
  -3   4   4   17.86    0.66
   3   4  -4   18.26    0.65
  -3   4   4   18.87    0.64
  -2  -4   4    0.10    0.11
   2  -4  -4    0.12    0.12
  -2  -4   4    0.09    0.07
   2  -4  -4   -0.06    0.10
  -2   4   4    0.04    0.09
   2   4  -4    0.18    0.10
  -2   4   4    0.17    0.10
   2   4  -4    0.19    0.11
  -1  -4   4   10.67    0.33
   1  -4  -4   10.53    0.40
  -1  -4   4   10.91    0.38
   1  -4  -4   10.34    0.39
  -1   4   4    9.67    0.38
   1   4  -4   10.43    0.35
   1   4  -4   11.04    0.39
  -1   4   4   10.98    0.41
   0  -4   4   16.50    0.49
   0  -4  -4   16.05    0.53
   0  -4  -4   16.60    0.56
   0  -4   4   16.29    0.46
   0  -4   4   16.29    0.47
   0   4   4   16.92    0.56
   0   4   4   17.04    0.53
   0   4  -4   16.77    0.48
   0   4  -4   16.42    0.51
  -1  -4  -4    0.89    0.11
  -1  -4  -4    0.72    0.12
   1  -4   4    0.86    0.12
  -1   4  -4    0.96    0.10
   1   4   4    0.77    0.11
  -1   4  -4    0.77    0.09
   1   4   4    0.71    0.11
   2  -4   4    0.18    0.12
  -2  -4  -4    0.39    0.10
  -2  -4  -4    0.43    0.13
   2   4   4    0.27    0.11
  -2   4  -4    0.26    0.06
  -2   4  -4    0.20    0.08
   2   4   4    0.36    0.11
  -3  -4  -4   19.88    0.64
   3  -4   4   18.48    0.70
  -3  -4  -4   19.86    0.70
   3   4   4   20.09    0.67
   3   4   4   18.60    0.66
  -3   4  -4   19.11    0.59
  -3   4  -4   19.57    0.61
  -4  -4  -4    0.11    0.18
  -4  -4  -4    0.10    0.15
   4  -4   4    0.03    0.17
  -4   4  -4    0.11    0.12
   4   4   4    0.25    0.14
   4   4   4    0.09    0.13
  -4   4  -4    0.03    0.10
  -5  -4  -4    0.70    0.18
   5  -4   4    0.65    0.24
  -5  -4  -4    0.62    0.20
  -5  -4  -4    0.80    0.24
   5   4   4    0.75    0.19
  -5   4  -4    0.67    0.18
   5   4   4    0.71    0.19
  -5   4  -4    0.91    0.17
   6  -4   4    5.10    0.56
  -6  -4  -4    7.19    0.46
  -6  -4  -4    6.02    0.49
  -6  -4  -4    7.55    0.54
   6   4   4    7.29    0.47
  -6   4  -4    6.68    0.42
   6   4   4    6.08    0.43
  -6   4  -4    6.26    0.50
  -7  -4  -4    1.97    0.38
  -7  -4  -4    1.69    0.32
   7  -4   4    2.02    0.44
  -7  -4  -4    1.48    0.32
  -7   4  -4    2.10    0.39
   7   4   4    2.33    0.31
  -7   4  -4    2.25    0.30
   7   4   4    2.88    0.42
  -8  -4  -4    1.85    0.42
  -8  -4  -4    3.14    0.43
  -8  -4  -4    2.43    0.41
   8  -4   4    3.77    0.82
  -8   4  -4    2.58    0.42
   8   4   4    2.68    0.37
  -8   4  -4    3.01    0.38
   8   4   4    3.32    0.49
  -9  -4  -4    0.93    0.39
   9   4   4   -0.06    0.35
   9   4   4    0.56    0.59
  -9   4  -4    0.77    0.35
  -9   4  -4    1.32    0.47
 -10  -4  -4    3.82    0.61
 -10   4  -4    5.41    0.76
  10   4   4    4.10    0.55
  10   4   4    3.28    0.55
 -11  -4  -4    1.74    0.66
  11   4   4    1.60    0.55
 -11   4  -4    0.06    0.57
 -11  -5   4    1.36    0.60
  11  -5  -4    0.23    0.40
  11   5  -4    2.20    0.56
 -11   5   4    0.69    0.49
  10  -5  -4    3.77    0.54
 -10  -5   4    3.75    0.58
  10  -5  -4    4.26    0.60
  10   5  -4    4.57    0.57
 -10   5   4    4.30    0.54
   9  -5  -4    0.89    0.29
  -9  -5   4    0.55    0.37
   9  -5  -4    2.05    0.43
   9   5  -4    0.42    0.36
  -9   5   4    1.51    0.38
   8  -5  -4    2.72    0.38
   8  -5  -4    2.58    0.33
  -8  -5   4    2.56    0.38
  -8  -5   4    2.65    0.42
  -8   5   4    2.03    0.35
   8   5  -4    2.33    0.42
   8   5  -4    2.71    0.44
  -8   5   4    3.11    0.45
   7  -5  -4    0.67    0.21
  -7  -5   4    0.23    0.28
   7  -5  -4    0.29    0.27
  -7  -5   4    0.00    0.24
  -7   5   4   -0.35    0.28
   7   5  -4    0.11    0.25
   7   5  -4   -0.22    0.29
  -7   5   4    0.35    0.25
   6  -5  -4    3.41    0.33
  -6  -5   4    3.33    0.43
   6  -5  -4    3.77    0.41
  -6  -5   4    3.38    0.38
  -6   5   4    3.26    0.36
  -6   5   4    3.13    0.40
   6   5  -4    3.29    0.40
   6   5  -4    3.58    0.44
  -5  -5   4   -0.14    0.14
   5  -5  -4   -0.15    0.13
  -5  -5   4   -0.28    0.18
   5  -5  -4   -0.02    0.18
   5   5  -4    0.06    0.18
  -5   5   4    0.04    0.19
   5   5  -4    0.08    0.19
  -5   5   4   -0.26    0.18
   4  -5  -4    3.62    0.33
  -4  -5   4    4.02    0.35
  -4  -5   4    4.25    0.29
   4  -5  -4    3.95    0.29
   4   5  -4    3.28    0.32
  -4   5   4    3.39    0.35
  -4   5   4    3.95    0.32
   4   5  -4    3.53    0.36
  -3  -5   4    9.40    0.44
   3  -5  -4    9.17    0.40
  -3  -5   4    9.16    0.37
   3  -5  -4    9.44    0.43
  -3   5   4    9.27    0.41
  -3   5   4    9.07    0.43
   3   5  -4    9.07    0.45
   3   5  -4    9.00    0.41
   2  -5  -4    0.49    0.13
  -2  -5   4    0.34    0.13
   2  -5  -4    0.59    0.14
  -2  -5   4    0.51    0.10
  -2   5   4    0.46    0.12
   2   5  -4    0.41    0.14
  -2   5   4    0.46    0.13
   2   5  -4    0.50    0.12
   1  -5  -4    0.21    0.11
   1  -5  -4    0.02    0.09
  -1  -5   4    0.06    0.09
   1   5  -4    0.21    0.08
  -1   5   4    0.18    0.10
   1   5  -4    0.24    0.11
  -1   5   4    0.24    0.10
   0  -5   4   12.20    0.39
   0  -5   4   12.61    0.38
   0  -5   4   12.72    0.40
   0  -5  -4   12.39    0.48
   0  -5  -4   12.23    0.45
   0   5   4   11.83    0.46
   0   5   4   12.60    0.44
   0   5  -4   12.64    0.40
   0   5  -4   12.35    0.43
  -1  -5  -4   79.04    2.14
  -1  -5  -4   79.70    2.20
   1  -5   4   77.86    2.14
  -1   5  -4   74.76    2.09
   1   5   4   80.15    2.18
   1   5   4   71.04    2.13
  -1   5  -4   80.24    2.11
  -2  -5  -4   16.74    0.64
  -2  -5  -4   17.45    0.58
   2  -5   4   17.02    0.62
   2   5   4   17.42    0.60
   2   5   4   17.38    0.62
  -2   5  -4   18.02    0.54
  -2   5  -4   16.98    0.53
   3  -5   4    0.15    0.16
  -3  -5  -4    0.18    0.13
  -3   5  -4    0.06    0.08
   3   5   4    0.07    0.12
   3   5   4    0.14    0.13
  -3   5  -4   -0.02    0.10
   4  -5   4    8.52    0.57
  -4  -5  -4    8.99    0.48
  -4  -5  -4    9.34    0.42
  -4   5  -4    8.58    0.38
   4   5   4    8.27    0.45
   4   5   4    9.45    0.45
  -4   5  -4    8.47    0.39
  -5  -5  -4    9.14    0.48
   5  -5   4    9.36    0.58
  -5  -5  -4    9.62    0.56
  -5  -5  -4    9.71    0.55
  -5   5  -4    9.39    0.47
   5   5   4   10.01    0.51
  -5   5  -4    9.82    0.45
   5   5   4    9.87    0.50
  -6  -5  -4    0.09    0.22
  -6  -5  -4    0.16    0.26
   6  -5   4    0.15    0.31
  -6  -5  -4    0.26    0.22
  -6   5  -4    0.58    0.23
   6   5   4    0.21    0.22
  -6   5  -4    0.27    0.20
   6   5   4    0.28    0.21
   7  -5   4    1.31    0.42
  -7  -5  -4    1.71    0.36
  -7  -5  -4    1.39    0.34
  -7  -5  -4    1.22    0.29
   7   5   4    1.68    0.32
  -7   5  -4    1.39    0.39
   7   5   4    1.71    0.31
  -7   5  -4    1.84    0.30
  -8  -5  -4    1.13    0.37
  -8  -5  -4    1.80    0.44
   8   5   4    1.75    0.43
  -8   5  -4    1.13    0.39
   8   5   4    1.01    0.34
  -8   5  -4    0.78    0.30
  -9  -5  -4    2.15    0.50
  -9  -5  -4    1.31    0.45
   9   5   4    0.86    0.41
   9   5   4    1.16    0.38
  -9   5  -4    0.88    0.37
  -9   5  -4    0.55    0.49
 -10  -5  -4    0.43    0.50
 -10   5  -4    1.86    0.47
  10   5   4    0.69    0.46
 -11  -6   4    1.36    0.65
  11  -6  -4    0.42    0.42
 -11   6   4    1.56    0.51
  11   6  -4    1.17    0.58
 -10  -6   4    0.35    0.50
  10  -6  -4    2.17    0.37
  10  -6  -4    1.93    0.55
  10   6  -4    0.97    0.48
 -10   6   4    1.19    0.41
   9  -6  -4    6.40    0.65
  -9  -6   4    6.75    0.75
   9  -6  -4    6.79    0.74
   9   6  -4    7.09    0.72
  -9   6   4    7.27    0.66
   8  -6  -4    0.54    0.24
  -8  -6   4   -0.40    0.40
  -8  -6   4    0.70    0.35
   8  -6  -4   -0.16    0.32
  -8   6   4    0.73    0.40
   8   6  -4    0.11    0.30
  -8   6   4   -0.06    0.26
   7  -6  -4    1.00    0.23
  -7  -6   4    0.31    0.25
   7  -6  -4    0.95    0.30
  -7   6   4    1.12    0.34
  -7   6   4    0.60    0.26
   7   6  -4    0.96    0.30
   7   6  -4    1.27    0.35
   6  -6  -4    0.02    0.22
   6  -6  -4   -0.01    0.17
  -6  -6   4   -0.05    0.24
  -6  -6   4    0.01    0.21
   6   6  -4    0.11    0.22
   6   6  -4   -0.15    0.26
  -6   6   4    0.26    0.25
  -6   6   4   -0.11    0.20
   5  -6  -4    8.11    0.50
  -5  -6   4    9.27    0.52
  -5  -6   4    8.03    0.53
   5  -6  -4    8.83    0.45
  -5   6   4    8.09    0.60
   5   6  -4    8.18    0.50
   5   6  -4    8.86    0.54
  -5   6   4    8.16    0.49
   4  -6  -4    1.84    0.26
  -4  -6   4    1.84    0.27
   4  -6  -4    1.62    0.44
  -4  -6   4    1.71    0.25
   4   6  -4    1.76    0.25
   4   6  -4    1.54    0.27
  -4   6   4    1.98    0.25
  -4   6   4    1.45    0.24
  -3  -6   4    0.30    0.16
  -3  -6   4    0.17    0.11
   3  -6  -4    0.09    0.13
   3  -6  -4    0.26    0.16
  -3   6   4    0.07    0.12
   3   6  -4    0.07    0.13
  -3   6   4   -0.13    0.13
   3   6  -4    0.18    0.19
  -2  -6   4    0.33    0.10
   2  -6  -4    0.31    0.14
   2  -6  -4    0.31    0.12
  -2  -6   4    0.43    0.15
  -2   6   4    0.20    0.12
   2   6  -4    0.45    0.12
  -2   6   4    0.28    0.13
   2   6  -4    0.33    0.15
  -1  -6   4   10.66    0.42
   1  -6  -4   10.57    0.45
   1  -6  -4   10.67    0.43
  -1  -6   4   10.49    0.37
   1   6  -4   10.22    0.44
  -1   6   4   10.90    0.45
   1   6  -4   10.79    0.39
   0  -6   4   11.41    0.39
   0  -6  -4   10.79    0.46
   0  -6   4   10.73    0.36
   0  -6  -4   11.13    0.43
   0   6   4   10.91    0.42
   0   6  -4   11.25    0.43
   0   6   4    9.99    0.45
   0   6  -4   10.90    0.38
  -1  -6  -4    2.03    0.24
   1  -6   4    1.65    0.19
   1   6   4    1.81    0.20
   1   6   4    1.63    0.22
  -1   6  -4    1.65    0.17
  -1   6  -4    1.73    0.16
  -2  -6  -4    0.37    0.15
   2  -6   4    0.11    0.14
  -2  -6  -4    0.20    0.15
  -2   6  -4    0.22    0.09
   2   6   4    0.31    0.13
  -2   6  -4    0.21    0.09
   3  -6   4   -0.04    0.17
  -3  -6  -4    0.07    0.14
  -3  -6  -4    0.04    0.12
   3   6   4    0.14    0.14
  -3   6  -4   -0.01    0.11
   3   6   4    0.25    0.15
  -3   6  -4    0.14    0.10
   4  -6   4    2.60    0.36
  -4  -6  -4    2.42    0.35
  -4  -6  -4    1.83    0.27
  -4   6  -4    2.01    0.23
   4   6   4    2.04    0.26
  -4   6  -4    2.02    0.26
   4   6   4    1.97    0.25
  -5  -6  -4    0.82    0.26
   5  -6   4    0.90    0.53
  -5  -6  -4    0.48    0.19
   5   6   4    0.92    0.23
  -5   6  -4    0.90    0.21
  -5   6  -4    1.02    0.21
   5   6   4    0.78    0.23
  -6  -6  -4    0.14    0.23
   6  -6   4   -0.53    0.28
  -6  -6  -4    0.09    0.25
  -6  -6  -4    0.10    0.24
  -6   6  -4    0.08    0.18
  -6   6  -4    0.14    0.21
   6   6   4   -0.03    0.22
   6   6   4   -0.21    0.23
   7  -6   4    0.22    0.39
  -7  -6  -4   -0.01    0.26
  -7  -6  -4    0.30    0.31
   7   6   4   -0.31    0.27
  -7   6  -4   -0.01    0.23
   7   6   4    0.20    0.29
  -7   6  -4    0.12    0.28
  -8  -6  -4    1.22    0.42
  -8  -6  -4    0.81    0.37
  -8   6  -4    1.29    0.43
   8   6   4    0.31    0.37
   8   6   4    1.43    0.36
  -8   6  -4    1.42    0.32
  -9  -6  -4    4.16    0.59
  -9  -6  -4    4.49    0.63
   9   6   4    4.14    0.53
  -9   6  -4    6.62    0.95
  -9   6  -4    5.55    0.63
 -10  -6  -4    2.70    0.62
 -10   6  -4    0.82    0.45
  10   6   4   -0.05    0.47
 -10  -7   4    0.06    0.50
  10  -7  -4    0.32    0.34
 -10   7   4    0.25    0.40
  10   7  -4    1.14    0.53
  -9  -7   4    0.89    0.43
   9  -7  -4    0.48    0.42
  -9   7   4   -0.45    0.32
   9   7  -4    0.03    0.41
   8  -7  -4    2.69    0.43
   8  -7  -4    2.77    0.33
  -8  -7   4    2.78    0.49
   8   7  -4    4.04    0.60
  -8   7   4    2.46    0.37
  -7  -7   4    0.28    0.31
   7  -7  -4   -0.40    0.30
   7  -7  -4    0.14    0.22
   7   7  -4    0.27    0.27
  -7   7   4    0.77    0.36
   7   7  -4    0.01    0.34
  -7   7   4    0.21    0.26
  -6  -7   4    2.01    0.28
   6  -7  -4    2.33    0.43
  -6  -7   4    2.22    0.37
   6  -7  -4    2.28    0.34
  -6   7   4    2.23    0.35
   6   7  -4    2.81    0.42
   6   7  -4    2.57    0.36
  -6   7   4    2.34    0.31
  -5  -7   4   -0.11    0.17
   5  -7  -4    0.44    0.23
   5  -7  -4   -0.19    0.15
  -5  -7   4    0.13    0.24
   5   7  -4    0.08    0.20
  -5   7   4   -0.03    0.22
   5   7  -4   -0.20    0.23
  -5   7   4    0.36    0.20
  -4  -7   4    5.33    0.33
   4  -7  -4    5.58    0.36
   4  -7  -4    5.13    0.41
  -4  -7   4    4.70    0.42
   4   7  -4    4.22    0.47
  -4   7   4    5.12    0.38
   4   7  -4    5.35    0.40
  -4   7   4    4.48    0.65
   3  -7  -4    4.02    0.35
  -3  -7   4    3.69    0.27
  -3  -7   4    3.86    0.36
  -3  -7   4    4.08    0.21
   3  -7  -4    4.16    0.31
  -3   7   4    4.09    0.34
  -3   7   4    4.38    0.32
   3   7  -4    4.49    0.37
   3   7  -4    3.64    0.32
  -2  -7   4    4.58    0.33
   2  -7  -4    3.63    0.52
  -2  -7   4    4.96    0.27
   2  -7  -4    4.54    0.32
   2   7  -4    4.73    0.30
   2   7  -4    4.17    0.37
  -2   7   4    4.36    0.33
  -2   7   4    4.51    0.32
   1  -7  -4    0.43    0.15
  -1  -7   4    0.63    0.15
  -1  -7   4    0.69    0.12
   1   7  -4    0.53    0.16
   1   7  -4    0.56    0.12
  -1   7   4    0.55    0.15
  -1   7   4    0.62    0.16
   0  -7  -4    0.03    0.14
   0  -7   4    0.31    0.10
   0  -7  -4    0.25    0.13
   0  -7   4    0.20    0.11
   0   7  -4    0.08    0.12
   0   7   4    0.37    0.12
   0   7   4    0.24    0.15
   0   7  -4    0.27    0.10
   1  -7   4    1.41    0.15
  -1  -7  -4    2.04    0.27
  -1  -7  -4    1.76    0.24
   1  -7   4    1.20    0.15
   1   7   4    1.75    0.26
   1   7   4    1.85    0.23
  -1   7  -4    1.80    0.20
  -2  -7  -4    0.15    0.14
  -2  -7  -4   -0.09    0.15
   2  -7   4    0.16    0.15
  -2   7  -4    0.05    0.10
   2   7   4   -0.06    0.15
  -2   7  -4    0.05    0.10
   2   7   4    0.15    0.13
  -3  -7  -4    1.26    0.24
  -3  -7  -4    1.06    0.21
   3  -7   4    0.90    0.23
   3   7   4    1.51    0.24
  -3   7  -4    1.22    0.17
  -3   7  -4    1.26    0.16
   3   7   4    1.23    0.26
   4  -7   4   12.60    0.64
  -4  -7  -4   12.53    0.64
  -4  -7  -4   12.21    0.53
  -4   7  -4   11.52    0.49
  -4   7  -4   11.90    0.49
   4   7   4   11.50    0.59
   4   7   4   12.69    0.59
  -5  -7  -4    0.98    0.23
  -5  -7  -4    1.11    0.29
   5  -7   4    0.77    0.29
   5   7   4    0.83    0.24
  -5   7  -4    1.22    0.21
  -5   7  -4    1.12    0.29
   5   7   4    1.09    0.27
  -6  -7  -4    0.57    0.28
   6  -7   4    0.68    0.34
  -6  -7  -4    0.06    0.28
  -6  -7  -4   -0.15    0.21
   6   7   4    0.06    0.23
  -6   7  -4    0.39    0.24
   6   7   4    0.17    0.27
  -6   7  -4    0.32    0.20
   7  -7   4    1.55    0.49
  -7  -7  -4    0.82    0.34
  -7  -7  -4    1.01    0.35
  -7   7  -4    1.14    0.34
   7   7   4    1.57    0.37
  -7   7  -4    1.13    0.28
   7   7   4    0.95    0.33
  -8  -7  -4    2.46    0.49
  -8  -7  -4    2.24    0.47
   8   7   4    1.61    0.42
  -8   7  -4    2.16    0.48
  -8   7  -4    1.96    0.45
  -9  -7  -4    3.05    0.56
  -9  -7  -4    4.17    0.63
  -9   7  -4    3.24    0.47
   9   7   4    3.30    0.52
 -10  -7  -4    1.45    0.63
  10   7   4    0.68    0.54
 -10   7  -4    1.12    0.48
  10  -8  -4    0.04    0.36
 -10  -8   4    0.02    0.54
  10   8  -4    0.70    0.56
 -10   8   4    0.64    0.44
   9  -8  -4    1.11    0.51
  -9  -8   4    0.86    0.48
   9  -8  -4    0.04    0.39
  -9   8   4    0.34    0.36
   9   8  -4    0.52    0.44
   8  -8  -4    0.31    0.39
   8  -8  -4    0.54    0.27
  -8  -8   4    0.25    0.40
   8   8  -4    0.06    0.37
  -8   8   4    0.45    0.31
   7  -8  -4    0.35    0.24
  -7  -8   4    0.55    0.27
   7  -8  -4   -0.02    0.34
  -7  -8   4    0.63    0.35
   7   8  -4    0.16    0.28
  -7   8   4    0.24    0.26
  -7   8   4   -0.08    0.38
  -6  -8   4    9.50    0.54
   6  -8  -4   10.30    0.64
  -6  -8   4    9.34    0.91
   6  -8  -4   10.07    0.54
   6   8  -4   10.13    0.71
  -6   8   4    9.77    0.67
   6   8  -4    9.69    0.62
  -6   8   4    8.95    0.74
  -5  -8   4    5.03    0.50
  -5  -8   4    4.47    0.37
   5  -8  -4    5.55    0.74
   5  -8  -4    5.57    0.40
  -5   8   4    5.17    0.41
   5   8  -4    5.28    0.46
  -5   8   4    5.07    0.50
   5   8  -4    4.73    0.54
  -4  -8   4    0.29    0.19
  -4  -8   4    0.11    0.22
   4  -8  -4    0.21    0.17
   4  -8  -4    0.34    0.22
  -4   8   4    0.32    0.23
  -4   8   4    0.18    0.18
   4   8  -4    0.12    0.21
   4   8  -4    0.09    0.23
  -3  -8   4   12.23    0.42
   3  -8  -4   11.85    0.55
  -3  -8   4   11.89    0.49
   3  -8  -4   13.35    0.59
  -3  -8   4   13.19    0.60
   3   8  -4   11.91    0.56
  -3   8   4   12.20    0.55
   3   8  -4   12.64    0.83
  -3   8   4   12.10    0.58
  -2  -8   4    0.91    0.21
  -2  -8   4    0.91    0.15
   2  -8  -4    0.56    0.18
   2  -8  -4    0.68    0.20
   2   8  -4    0.60    0.22
   2   8  -4    0.87    0.18
  -2   8   4    1.17    0.21
   1  -8  -4    8.96    0.45
   1  -8  -4    9.31    0.47
  -1  -8   4    9.10    0.37
  -1  -8   4    8.49    0.43
  -1   8   4   10.10    0.48
   1   8  -4    8.33    0.57
   1   8  -4    9.49    0.41
  -1   8   4    9.28    0.43
   0  -8  -4   -0.06    0.15
   0  -8  -4   -0.04    0.14
   0  -8   4    0.01    0.12
   0  -8   4    0.06    0.11
   0   8   4    0.16    0.14
   0   8  -4    0.05    0.14
   0   8   4   -0.02    0.16
   0   8  -4    0.10    0.11
   1  -8   4    8.41    0.34
  -1  -8  -4    8.65    0.43
   1  -8   4    8.27    0.32
  -1  -8  -4    8.75    0.49
   1   8   4    8.68    0.42
  -1   8  -4    7.91    0.37
  -1   8  -4    8.62    0.40
  -2  -8  -4    4.05    0.39
   2  -8   4    4.70    0.37
  -2  -8  -4    4.66    0.34
   2   8   4    4.51    0.38
   2   8   4    4.67    0.35
  -2   8  -4    4.41    0.29
  -2   8  -4    4.09    0.30
   3  -8   4    0.02    0.20
  -3  -8  -4    0.11    0.17
  -3  -8  -4    0.21    0.20
   3   8   4    0.07    0.19
  -3   8  -4    0.36    0.15
   3   8   4    0.28    0.21
  -3   8  -4    0.24    0.14
   4  -8   4   18.18    0.82
  -4  -8  -4   18.69    0.83
  -4  -8  -4   18.76    0.71
   4   8   4   18.03    0.78
  -4   8  -4   17.00    0.87
   4   8   4   18.89    0.78
  -4   8  -4   17.88    0.65
  -5  -8  -4    1.01    0.26
  -5  -8  -4    0.82    0.31
   5  -8   4    1.18    0.34
   5   8   4    0.81    0.28
  -5   8  -4    0.99    0.24
  -5   8  -4    1.10    0.22
   5   8   4    0.91    0.29
   6  -8   4    1.36    0.42
  -6  -8  -4    1.24    0.35
  -6  -8  -4    1.62    0.38
  -6  -8  -4    1.20    0.34
  -6   8  -4    0.88    0.30
   6   8   4    1.61    0.34
  -6   8  -4    1.56    0.24
   6   8   4    1.66    0.36
  -7  -8  -4    0.60    0.33
  -7  -8  -4    0.00    0.35
   7  -8   4    0.04    0.53
  -7   8  -4   -0.38    0.34
   7   8   4    0.35    0.34
  -7   8  -4    0.70    0.25
  -8  -8  -4    0.10    0.42
  -8  -8  -4    0.75    0.44
  -8   8  -4    0.54    0.48
   8   8   4   -0.77    0.37
  -8   8  -4   -0.10    0.28
  -9  -8  -4   -0.32    0.51
  -9  -8  -4    0.22    0.51
   9   8   4   -0.70    0.44
  -9   8  -4    0.25    0.38
  10  -9  -4    0.76    0.39
 -10  -9   4    1.23    0.88
 -10   9   4    0.79    0.44
   9  -9  -4    0.94    0.35
  -9  -9   4    1.68    0.56
  -9   9   4    1.26    0.39
   9   9  -4    0.84    0.49
   8  -9  -4    3.63    0.48
  -8  -9   4    4.20    0.57
   8  -9  -4    4.11    0.54
  -8   9   4    3.62    0.53
   8   9  -4    2.74    0.50
   7  -9  -4    0.68    0.37
   7  -9  -4   -0.22    0.23
  -7  -9   4    0.07    0.34
  -7   9   4    0.16    0.26
   7   9  -4    0.32    0.32
   6  -9  -4    3.96    0.54
  -6  -9   4    3.41    0.45
   6  -9  -4    2.72    0.39
  -6  -9   4    2.61    0.33
  -6   9   4    2.71    0.35
   6   9  -4    2.21    0.39
  -6   9   4    3.14    0.44
  -5  -9   4    0.26    0.27
   5  -9  -4    0.88    0.28
  -5  -9   4    0.81    0.22
   5  -9  -4    0.58    0.22
   5   9  -4    0.28    0.30
  -5   9   4    0.55    0.31
   5   9  -4    0.68    0.28
  -5   9   4    0.61    0.31
   4  -9  -4    0.18    0.19
   4  -9  -4    0.24    0.23
  -4  -9   4    0.05    0.17
  -4  -9   4    0.48    0.25
  -4  -9   4    0.20    0.15
   4   9  -4   -0.03    0.20
   4   9  -4    0.35    0.27
  -4   9   4   -0.03    0.24
  -3  -9   4   22.46    0.75
   3  -9  -4   22.18    0.83
  -3  -9   4   21.28    0.66
  -3  -9   4   21.55    0.86
   3  -9  -4   22.17    0.94
  -3   9   4   21.18    0.81
   3   9  -4   22.36    0.83
   3   9  -4   21.05    0.87
  -3   9   4   21.34    0.86
   2  -9  -4    1.85    0.26
   2  -9  -4    1.37    0.42
  -2  -9   4    1.72    0.27
  -2  -9   4    1.62    0.24
   2   9  -4    2.47    0.30
   2   9  -4    2.09    0.29
  -2   9   4    1.76    0.28
  -1  -9   4   14.18    0.52
   1  -9  -4   14.20    0.64
  -1  -9   4   14.59    0.60
   1  -9  -4   14.41    0.67
  -1   9   4   13.62    0.58
   1   9  -4   14.86    0.63
   1   9  -4   14.70    0.56
  -1   9   4   14.96    0.64
   0  -9   4    1.06    0.19
   0  -9  -4    1.37    0.24
   0  -9   4    1.21    0.17
   0  -9  -4    1.17    0.22
   0   9  -4    1.32    0.18
   0   9  -4    1.20    0.21
   0   9   4    1.40    0.24
   0   9   4    1.12    0.19
  -1  -9  -4   -0.19    0.17
   1  -9   4    0.14    0.13
  -1  -9  -4    0.29    0.18
   1  -9   4    0.03    0.11
   1   9   4   -0.14    0.14
   1   9   4    0.26    0.21
  -1   9  -4    0.01    0.16
  -1   9  -4    0.35    0.14
  -2  -9  -4    0.14    0.19
  -2  -9  -4    0.12    0.18
   2   9   4   -0.10    0.21
  -2   9  -4    0.37    0.16
  -2   9  -4   -0.01    0.14
   2   9   4    0.23    0.18
  -3  -9  -4    4.78    0.49
   3  -9   4    4.00    0.54
  -3  -9  -4    5.43    0.40
   3   9   4    5.20    0.47
  -3   9  -4    4.91    0.32
  -3   9  -4    5.08    0.36
   3   9   4    4.22    0.42
   4  -9   4    2.85    0.65
  -4  -9  -4    3.03    0.38
  -4  -9  -4    2.83    0.39
   4   9   4    3.54    0.48
  -4   9  -4    3.04    0.36
  -4   9  -4    3.16    0.31
   4   9   4    2.45    0.58
   5  -9   4    0.78    0.36
  -5  -9  -4    0.09    0.24
  -5  -9  -4    0.47    0.31
  -5   9  -4    0.70    0.25
  -5   9  -4    0.61    0.20
   5   9   4    0.60    0.28
   5   9   4    0.88    0.33
  -6  -9  -4    3.52    0.48
  -6  -9  -4    3.53    0.54
   6  -9   4    3.26    0.51
  -6   9  -4    4.03    0.54
   6   9   4    3.90    0.48
  -6   9  -4    3.11    0.39
  -7  -9  -4   -0.69    0.36
  -7  -9  -4   -0.10    0.35
  -7   9  -4   -0.13    0.41
  -7   9  -4    0.54    0.29
   7   9   4   -0.07    0.35
  -8  -9  -4    1.25    0.52
  -8  -9  -4    1.00    0.50
   8   9   4    1.41    0.46
  -8   9  -4    2.06    0.37
  -9  -9  -4    0.22    0.58
  -9  -9  -4   -0.02    0.55
  -9   9  -4    1.00    0.39
   9   9   4   -1.22    0.50
   9 -10  -4    3.03    0.43
  -9 -10   4    2.97    0.64
   9  10  -4    2.67    0.62
  -9  10   4    2.63    0.47
   8 -10  -4    6.16    0.87
  -8 -10   4    2.86    0.58
   8  10  -4    4.29    0.61
  -8  10   4    3.43    0.44
   7 -10  -4    2.58    0.36
  -7 -10   4    2.36    0.48
   7 -10  -4    3.25    0.49
   7  10  -4    2.33    0.46
  -7  10   4    2.43    0.36
  -6 -10   4   -0.07    0.26
   6 -10  -4    0.59    0.36
  -6 -10   4    0.03    0.33
   6 -10  -4   -0.16    0.25
  -6  10   4   -0.14    0.23
   6  10  -4    0.35    0.32
   5 -10  -4    1.15    0.32
  -5 -10   4    1.01    0.26
   5 -10  -4    1.21    0.28
  -5  10   4    1.22    0.38
   5  10  -4    1.30    0.33
   5  10  -4    1.15    0.40
  -5  10   4    0.87    0.24
   4 -10  -4    0.53    0.22
  -4 -10   4    0.27    0.20
   4 -10  -4    0.27    0.27
  -4 -10   4    0.32    0.16
  -4 -10   4   -0.06    0.27
  -4  10   4    0.70    0.29
   4  10  -4    0.23    0.24
  -4  10   4    0.36    0.24
   4  10  -4    0.40    0.30
   3 -10  -4    5.91    0.47
  -3 -10   4    4.58    0.25
   3 -10  -4    5.01    0.43
  -3 -10   4    4.20    0.45
  -3 -10   4    4.44    0.42
   3  10  -4    4.48    0.42
  -3  10   4    5.09    0.40
  -3  10   4    4.69    0.49
   3  10  -4    5.37    0.51
  -2 -10   4    3.40    0.30
  -2 -10   4    2.96    0.39
   2 -10  -4    4.42    0.41
   2 -10  -4    3.41    0.45
  -2  10   4    3.69    0.43
   2  10  -4    3.62    0.44
  -2  10   4    3.79    0.36
   2  10  -4    3.04    0.35
   1 -10  -4   10.51    0.58
  -1 -10   4   10.39    0.44
  -1 -10   4   10.49    0.53
   1 -10  -4   10.79    0.53
  -1  10   4   10.72    0.51
   1  10  -4    9.98    0.56
   1  10  -4   10.16    0.49
  -1  10   4   10.96    0.59
   0 -10  -4   18.17    0.79
   0 -10  -4   17.84    0.70
   0 -10   4   17.10    0.62
   0 -10   4   18.49    0.67
   0  10   4   17.13    0.77
   0  10  -4   16.93    0.72
   0  10   4   18.60    0.70
   0  10  -4   18.72    0.66
   1 -10   4    0.14    0.15
  -1 -10  -4    0.23    0.17
   1 -10   4    0.24    0.13
  -1 -10  -4    0.18    0.22
   1  10   4   -0.08    0.15
  -1  10  -4    0.00    0.14
   1  10   4   -0.03    0.22
  -2 -10  -4    2.20    0.28
  -2 -10  -4    2.36    0.36
   2  10   4    1.94    0.33
  -2  10  -4    2.04    0.26
  -3 -10  -4    1.71    0.36
   3 -10   4    2.09    0.34
   3  10   4    2.16    0.31
  -3  10  -4    1.95    0.23
   3  10   4    1.98    0.35
  -3  10  -4    2.22    0.28
  -4 -10  -4   -0.38    0.23
  -4 -10  -4    0.29    0.30
   4 -10   4    0.04    0.33
   4  10   4    0.56    0.31
   4  10   4    0.25    0.26
  -4  10  -4   -0.22    0.22
  -4  10  -4   -0.16    0.15
   5 -10   4    0.07    0.38
  -5 -10  -4   -0.23    0.30
   5  10   4   -0.30    0.28
  -5  10  -4    0.27    0.28
  -5  10  -4    0.01    0.19
   6 -10   4    0.45    0.49
  -6 -10  -4    0.19    0.35
  -6 -10  -4    0.79    0.40
   6  10   4    0.35    0.32
  -6  10  -4   -0.01    0.37
  -6  10  -4   -0.08    0.22
  -7 -10  -4    0.33    0.40
  -7 -10  -4    0.09    0.43
  -7  10  -4    0.56    0.27
  -7  10  -4   -0.14    0.47
   7  10   4   -0.11    0.37
  -8 -10  -4   -0.05    0.52
  -8 -10  -4    0.84    0.50
  -8  10  -4    0.38    0.33
   8  10   4    0.00    0.48
  -8 -11   4    1.73    0.59
   8 -11  -4    1.48    0.39
  -8  11   4    0.69    0.38
   8  11  -4    1.65    0.53
  -7 -11   4    0.65    0.46
   7 -11  -4    1.17    0.50
  -7  11   4   -0.08    0.29
   7  11  -4    0.06    0.41
   6 -11  -4    0.50    0.29
  -6 -11   4   -0.33    0.37
   6 -11  -4    0.30    0.42
   6  11  -4    0.06    0.33
  -6  11   4    0.13    0.26
  -5 -11   4    2.82    0.43
   5 -11  -4    2.44    0.35
  -5 -11   4    2.14    0.33
   5 -11  -4    2.50    0.41
  -5  11   4    2.53    0.34
   5  11  -4    2.46    0.39
  -4 -11   4    1.18    0.34
   4 -11  -4    0.82    0.28
   4 -11  -4    1.63    0.34
  -4  11   4    0.94    0.26
   4  11  -4    0.61    0.30
   3 -11  -4    0.08    0.23
  -3 -11   4    0.00    0.20
  -3 -11   4   -0.08    0.27
   3 -11  -4    0.16    0.26
   3  11  -4   -0.41    0.31
   3  11  -4   -0.02    0.22
  -3  11   4    0.07    0.29
   2 -11  -4    4.10    0.47
   2 -11  -4    3.12    0.43
  -2 -11   4    3.48    0.33
  -2 -11   4    3.25    0.38
   2  11  -4    3.49    0.41
   2  11  -4    2.80    0.42
  -2  11   4    3.48    0.41
  -2  11   4    2.59    0.35
  -1 -11   4    1.62    0.27
   1 -11  -4    1.76    0.31
   1 -11  -4    1.83    0.28
  -1  11   4    1.63    0.24
   1  11  -4    1.77    0.31
   1  11  -4    1.38    0.23
  -1  11   4    1.56    0.34
   0 -11   4    1.25    0.23
   0 -11  -4    1.09    0.30
   0 -11  -4    1.55    0.26
   0 -11   4    1.54    0.21
   0  11  -4    1.56    0.28
   0  11   4    1.63    0.32
   0  11   4    1.42    0.25
   0  11  -4    1.25    0.22
  -1 -11  -4    1.20    0.25
   1 -11   4    1.90    0.28
   1 -11   4    1.36    0.19
  -1 -11  -4    1.45    0.39
   1  11   4    1.28    0.25
   1  11   4    1.61    0.33
  -1  11  -4    1.11    0.26
  -1  11  -4    0.84    0.19
  -2 -11  -4    2.00    0.28
   2 -11   4    2.50    0.38
  -2 -11  -4    1.75    0.34
   2  11   4    1.94    0.30
  -2  11  -4    1.67    0.23
   2  11   4    2.45    0.40
  -2  11  -4    2.31    0.31
  -3 -11  -4    1.29    0.30
  -3 -11  -4    2.07    0.39
   3 -11   4    1.63    0.36
   3  11   4    1.58    0.32
  -3  11  -4    1.95    0.32
  -4 -11  -4    0.29    0.33
   4 -11   4    0.42    0.39
  -4  11  -4   -0.21    0.28
  -4  11  -4    0.05    0.20
   4  11   4    0.48    0.29
   5 -11   4    1.99    0.50
  -5 -11  -4    2.00    0.46
  -5  11  -4    3.02    0.42
   5  11   4    3.06    0.46
  -5  11  -4    2.24    0.30
  -6 -11  -4    0.17    0.38
  -6 -11  -4    0.54    0.44
  -6  11  -4    0.71    0.26
   6  11   4    1.01    0.38
  -6  11  -4    1.78    0.46
  -7 -11  -4    1.08    0.46
  -7 -11  -4    1.18    0.51
   7  11   4    1.32    0.48
  -8 -11  -4    1.11    0.59
   8  11   4    0.45    0.54
  -8  11  -4    1.01    0.38
  -8  12   4    1.30    0.42
   7 -12  -4    0.38    0.37
  -7 -12   4    0.64    0.55
  -7  12   4   -0.44    0.34
   7  12  -4    0.11    0.45
   6 -12  -4   -0.30    0.48
  -6 -12   4   -0.15    0.44
   6 -12  -4    0.09    0.33
  -6  12   4   -0.33    0.28
   6  12  -4   -0.73    0.37
   5 -12  -4    0.65    0.35
   5 -12  -4    0.51    0.41
  -5 -12   4    0.56    0.39
  -5  12   4    0.26    0.27
   5  12  -4    0.13    0.35
  -4 -12   4    0.69    0.27
   4 -12  -4    0.59    0.37
  -4 -12   4    0.47    0.34
   4 -12  -4    0.61    0.53
   4  12  -4   -0.07    0.30
   3 -12  -4    1.31    0.35
  -3 -12   4    0.76    0.33
  -3 -12   4    1.01    0.26
   3  12  -4    1.00    0.30
  -3  12   4    0.58    0.25
   2 -12  -4    0.12    0.34
  -2 -12   4    0.56    0.22
  -2 -12   4    0.77    0.30
   2 -12  -4    1.10    0.30
  -2  12   4    0.49    0.20
   2  12  -4    0.60    0.35
   2  12  -4    0.30    0.24
  -1 -12   4    0.49    0.20
   1 -12  -4    0.70    0.28
   1 -12  -4    0.40    0.28
  -1 -12   4    1.47    0.29
  -1  12   4    0.18    0.20
   1  12  -4    0.07    0.31
   1  12  -4    0.67    0.22
   0 -12   4    0.07    0.22
   0 -12   4    0.26    0.20
   0 -12  -4    0.42    0.27
   0 -12  -4    0.86    0.31
   0  12  -4    0.45    0.29
   0  12   4    0.55    0.23
   1 -12   4    0.50    0.18
  -1 -12  -4   -0.01    0.25
   1 -12   4    0.55    0.20
  -1 -12  -4   -0.04    0.28
   1  12   4   -0.09    0.21
  -1  12  -4   -0.05    0.28
  -1  12  -4   -0.01    0.20
   2 -12   4    0.62    0.32
  -2 -12  -4    0.18    0.32
  -2  12  -4    1.12    0.22
   2  12   4    0.92    0.27
  -2  12  -4    0.42    0.29
  -3 -12  -4    1.22    0.38
   3 -12   4    0.67    0.45
  -3  12  -4    0.51    0.31
   3  12   4    0.15    0.28
  -4 -12  -4    1.57    0.44
   4 -12   4    0.38    0.46
   4  12   4    1.22    0.37
  -4  12  -4    1.42    0.28
  -4  12  -4    1.30    0.38
   5 -12   4    0.04    0.53
  -5 -12  -4    0.41    0.43
  -5  12  -4    1.18    0.28
  -5  12  -4    1.08    0.57
   5  12   4    0.57    0.39
  -6 -12  -4    2.62    0.50
  -6 -12  -4    1.70    0.59
   6  12   4    2.75    0.53
  -6  12  -4    1.95    0.35
  -7 -12  -4   -0.80    0.48
  -7 -12  -4   -0.40    0.60
   7  12   4    0.04    0.51
  -7  12  -4   -0.07    0.32
  -7  13   4   -0.27    0.39
   6 -13  -4    0.15    0.39
  -6 -13   4    0.12    0.52
  -6  13   4   -0.48    0.35
   6  13  -4    0.20    0.47
   5 -13  -4    0.58    0.50
  -5 -13   4    0.81    0.45
   5 -13  -4   -0.34    0.34
  -5  13   4   -0.21    0.29
   5  13  -4   -0.69    0.40
  -4 -13   4    0.08    0.40
   4 -13  -4    0.24    0.33
  -4 -13   4    0.09    0.31
   4 -13  -4    0.26    0.45
  -4  13   4    0.07    0.26
   4  13  -4   -0.57    0.33
   3 -13  -4    0.19    0.31
  -3 -13   4    0.03    0.28
   3 -13  -4    0.71    0.39
   3  13  -4   -0.07    0.29
  -3  13   4   -0.18    0.22
  -2 -13   4    0.81    0.34
   2 -13  -4    0.60    0.36
  -2 -13   4    0.35    0.25
   2 -13  -4    0.64    0.34
   2  13  -4   -0.31    0.26
  -2  13   4    0.23    0.22
   1 -13  -4    1.25    0.35
   1 -13  -4    0.85    0.33
  -1 -13   4    1.35    0.28
  -1 -13   4    1.47    0.32
   1  13  -4    0.98    0.28
  -1  13   4    0.61    0.25
   0 -13  -4    1.91    0.39
   0 -13   4    1.90    0.31
   0 -13   4    1.81    0.35
   0  13  -4    1.05    0.26
   0  13   4    0.87    0.29
   1 -13   4   -0.22    0.22
   1 -13   4    0.50    0.22
  -1 -13  -4   -0.16    0.36
  -1  13  -4    0.99    0.56
   1  13   4    0.01    0.24
  -1  13  -4    0.03    0.20
   2 -13   4    1.31    0.41
  -2 -13  -4    0.59    0.40
  -2  13  -4    0.90    0.24
   2  13   4    0.54    0.29
  -3 -13  -4   -0.11    0.42
   3 -13   4   -0.55    0.43
  -3  13  -4    0.24    0.22
   3  13   4    0.11    0.33
   4 -13   4    1.52    0.55
  -4 -13  -4    0.53    0.47
   4  13   4    0.86    0.40
  -4  13  -4    0.61    0.25
  -5 -13  -4   -0.72    0.46
  -5  13  -4   -0.14    0.30
   5  13   4    0.79    0.46
  -6 -13  -4    8.05    1.07
  -6 -13  -4    7.59    0.88
   6  13   4    7.49    0.94
  -6  13  -4    7.99    0.66
   5 -14  -4   -0.34    0.41
  -5 -14   4    1.26    0.54
  -5  14   4   -0.22    0.32
   5  14  -4    0.21    0.50
   4 -14  -4    0.61    0.42
  -4 -14   4    0.08    0.46
   4  14  -4   -0.40    0.43
  -4  14   4    0.23    0.32
   3 -14  -4    0.46    0.38
  -3 -14   4    0.46    0.35
  -3 -14   4   -0.14    0.41
  -3  14   4   -0.19    0.27
   3  14  -4    0.27    0.37
  -2 -14   4    0.63    0.31
  -2 -14   4   -0.38    0.37
   2 -14  -4   -0.27    0.37
   2  14  -4   -0.67    0.30
  -2  14   4   -0.27    0.25
   1 -14  -4    0.30    0.39
  -1 -14   4    0.31    0.36
  -1 -14   4    0.97    0.40
  -1  14   4    0.39    0.28
   1  14  -4    0.06    0.28
   0 -14  -4    0.84    0.42
   0 -14   4    0.92    0.32
   0  14   4    1.32    0.33
   0  14  -4    0.91    0.28
  -1 -14  -4    0.80    0.42
   1 -14   4    0.49    0.27
   1  14   4    0.73    0.33
  -1  14  -4    0.20    0.26
  -2 -14  -4   -0.01    0.43
   2  14   4   -0.04    0.34
  -2  14  -4    0.27    0.25
  -3 -14  -4    0.51    0.49
   3  14   4   -0.01    0.37
  -3  14  -4    0.23    0.25
  -4 -14  -4    0.68    0.53
   4  14   4   -0.23    0.41
  -4  14  -4    0.58    0.29
  -5 -14  -4    1.10    0.68
  -5  14  -4    0.42    0.33
  -3 -15   4    1.51    0.53
   3 -15  -4    0.32    0.48
   3  15  -4    0.30    0.43
  -3  15   4    0.03    0.31
   2 -15  -4    0.28    0.46
  -2 -15   4   -0.11    0.74
   2  15  -4    0.55    0.41
  -2  15   4   -0.30    0.30
  -1 -15   4    1.01    0.44
   1 -15  -4   -0.15    0.43
   1  15  -4   -0.34    0.34
  -1  15   4   -0.22    0.32
   0 -15  -4    2.29    0.52
   0  15   4    0.79    0.36
   0  15  -4    0.95    0.35
  -1 -15  -4    0.66    0.48
   1  15   4    0.45    0.37
  -1  15  -4    1.12    0.33
  -2 -15  -4    0.77    0.54
  -2  15  -4    0.81    0.32
   2  15   4    1.01    0.43
  -3 -15  -4   -0.37    0.58
 -12   0   5   -0.58    0.69
  12   0  -5   -0.30    0.50
 -11   0   5   -0.24    0.45
  11   0  -5    0.48    0.42
  10   0  -5    0.25    0.36
 -10   0   5    0.49    0.39
  -9   0   5    0.28    0.30
   9   0  -5    0.16    0.38
   9   0  -5   -0.03    0.41
   9   0  -5   -0.10    0.27
  -9   0   5   -0.41    0.35
   8   0  -5   -0.18    0.31
   8   0  -5   -0.22    0.29
  -8   0   5    0.44    0.28
   8   0  -5   -0.43    0.22
  -8   0   5   -0.19    0.24
  -7   0   5    0.04    0.22
   7   0  -5   -0.20    0.21
   7   0  -5    0.30    0.52
  -7   0   5   -0.22    0.24
   7   0  -5   -0.44    0.23
  -6   0   5    0.07    0.18
   6   0  -5   -0.10    0.17
  -6   0   5   -0.16    0.19
   6   0  -5   -0.11    0.18
  -5   0   5    0.15    0.16
   5   0  -5    0.11    0.13
  -5   0   5    0.03    0.15
   5   0  -5   -0.12    0.15
  -4   0   5   -0.07    0.12
   4   0  -5    0.09    0.13
   4   0  -5   -0.05    0.12
  -4   0   5   -0.16    0.12
  -3   0   5   -0.12    0.10
   3   0  -5   -0.19    0.10
  -3   0   5   -0.03    0.11
   3   0  -5   -0.06    0.09
  -2   0   5   -0.06    0.09
  -2   0   5   -0.07    0.08
   2   0  -5    0.05    0.09
   2   0  -5   -0.17    0.09
   1   0  -5    0.02    0.07
   1   0  -5   -0.06    0.08
  -1   0   5   -0.03    0.07
  -1   0   5   -0.03    0.06
   0   0   5    0.06    0.04
   0   0  -5   -0.06    0.05
  -1   0  -5    0.06    0.05
  -1   0  -5   -0.04    0.04
  -2   0  -5   -0.05    0.06
  -2   0  -5    0.00    0.05
  -3   0  -5   -0.07    0.13
   3   0   5   -0.01    0.04
   3   0   5   -0.09    0.05
  -3   0  -5   -0.07    0.07
  -3   0  -5   -0.06    0.08
  -4   0  -5   -0.05    0.10
   4   0   5    0.11    0.07
   4   0   5   -0.04    0.08
  -4   0  -5   -0.15    0.16
  -4   0  -5    0.00    0.11
  -5   0  -5   -0.04    0.14
   5   0   5    0.00    0.10
   5   0   5   -0.17    0.08
  -5   0  -5    0.04    0.13
  -5   0  -5   -0.05    0.19
  -6   0  -5   -0.11    0.21
  -6   0  -5   -0.20    0.17
   6   0   5    0.10    0.12
  -6   0  -5    0.17    0.19
  -7   0  -5    0.34    0.22
  -7   0  -5   -0.08    0.29
   7   0   5    0.04    0.15
  -7   0  -5   -0.16    0.25
   7   0   5    0.00    0.13
  -8   0  -5   -0.54    0.30
   8   0   5    0.11    0.17
  -8   0  -5    0.11    0.28
   8   0   5   -0.05    0.17
   9   0   5   -0.09    0.21
  -9   0  -5    0.44    0.40
   9   0   5    0.18    0.21
  -9   0  -5    0.04    0.32
 -10   0  -5    0.13    0.40
  10   0   5   -0.14    0.25
 -11   0  -5    0.35    0.54
  12  -1  -5    0.64    0.50
 -12   1   5    0.64    0.75
  12   1  -5    0.00    0.54
  11  -1  -5    0.25    0.42
 -11  -1   5    0.95    0.50
  11   1  -5    1.12    0.45
 -11   1   5    0.36    0.47
 -10  -1   5    8.75    0.76
  10  -1  -5    8.35    1.02
  10  -1  -5    8.19    0.68
 -10   1   5    8.83    0.76
  10   1  -5    7.58    0.72
   9  -1  -5   -0.07    0.37
  -9  -1   5    0.68    0.43
   9  -1  -5   -0.44    0.41
  -9  -1   5   -0.26    0.30
   9  -1  -5    0.01    0.30
  -9   1   5   -0.15    0.30
  -9   1   5    0.77    0.42
   9   1  -5   -0.15    0.30
   9   1  -5    0.36    0.40
   9   1  -5    0.60    0.39
   8  -1  -5   -0.02    0.32
  -8  -1   5    0.03    0.28
  -8  -1   5    0.77    0.30
   8  -1  -5    0.36    0.25
   8  -1  -5    0.56    0.31
  -8   1   5    0.19    0.32
  -8   1   5    0.33    0.28
   8   1  -5    0.58    0.32
   8   1  -5    0.16    0.25
   8   1  -5    0.44    0.33
   7  -1  -5    0.67    0.25
   7  -1  -5    0.46    0.28
  -7  -1   5    0.72    0.28
  -7  -1   5    0.72    0.25
   7  -1  -5    0.76    0.23
   7   1  -5    0.41    0.23
   7   1  -5    0.57    0.27
   7   1  -5    0.37    0.29
  -7   1   5    0.81    0.26
  -7   1   5    0.31    0.26
   6  -1  -5   -0.08    0.16
  -6  -1   5   -0.05    0.20
   6  -1  -5    0.03    0.20
  -6  -1   5   -0.40    0.18
   6   1  -5   -0.20    0.19
   6   1  -5    0.18    0.17
   6   1  -5    0.26    0.34
  -6   1   5   -0.06    0.18
  -6   1   5   -0.10    0.18
   5  -1  -5    0.30    0.19
  -5  -1   5    0.35    0.16
   5  -1  -5    0.41    0.17
  -5  -1   5    0.34    0.18
   5   1  -5    0.21    0.16
   5   1  -5    0.19    0.17
  -5   1   5    0.14    0.16
  -5   1   5    0.44    0.17
  -4  -1   5    5.41    0.32
   4  -1  -5    5.55    0.33
  -4  -1   5    5.24    0.33
   4  -1  -5    4.75    0.32
   4   1  -5    5.31    0.33
  -4   1   5    4.98    0.33
  -4   1   5    5.38    0.33
   4   1  -5    5.06    0.33
  -3  -1   5    2.78    0.22
   3  -1  -5    2.78    0.24
  -3  -1   5    2.71    0.24
   3  -1  -5    2.97    0.23
   3   1  -5    3.08    0.24
  -3   1   5    2.87    0.24
   3   1  -5    2.67    0.23
  -3   1   5    2.41    0.23
  -2  -1   5   16.88    0.55
   2  -1  -5   17.43    0.56
  -2  -1   5   17.41    0.55
   2  -1  -5   16.90    0.57
  -2   1   5   17.92    0.55
   2   1  -5   17.64    0.57
  -2   1   5   15.69    0.56
   2   1  -5   16.34    0.56
   1  -1  -5   50.70    1.44
  -1  -1   5   50.96    1.40
   1  -1  -5   53.04    1.43
  -1   1   5   51.23    1.41
  -1   1   5   51.00    1.44
   1   1  -5   52.68    1.43
   1   1  -5   53.19    1.42
   0  -1  -5   12.40    0.38
   0  -1  -5   12.55    0.39
   0   1  -5   11.82    0.34
   0   1   5   11.67    0.38
   0   1   5   12.22    0.36
  -1  -1  -5    2.39    0.14
  -1  -1  -5    2.31    0.13
   1   1   5    2.05    0.13
   1   1   5    2.35    0.13
  -2  -1  -5   11.96    0.40
  -2  -1  -5   11.93    0.40
   2   1   5   12.63    0.39
  -2   1  -5   12.01    0.47
  -2   1  -5   11.84    0.36
   2   1   5   12.18    0.38
  -2   1  -5   11.62    0.35
  -3  -1  -5    1.05    0.15
  -3  -1  -5    1.10    0.16
   3   1   5    1.09    0.12
  -3   1  -5    1.25    0.13
  -3   1  -5    1.01    0.14
  -3   1  -5    1.03    0.18
   3   1   5    1.04    0.13
  -4  -1  -5   25.10    0.91
  -4  -1  -5   25.20    0.82
  -4  -1  -5   26.28    0.82
  -4   1  -5   25.14    0.80
   4   1   5   25.70    0.76
  -4   1  -5   25.40    0.80
  -4   1  -5   24.79    0.91
   4   1   5   25.38    0.79
  -5  -1  -5   10.09    0.48
  -5  -1  -5   10.88    0.47
  -5  -1  -5   10.37    0.57
   5  -1   5    9.65    0.32
   5  -1   5   10.49    0.34
   5   1   5    9.32    0.39
  -5   1  -5   10.72    0.57
   5   1   5   10.49    0.43
  -5   1  -5    9.79    0.45
  -5   1  -5    9.89    0.45
   6  -1   5    1.86    0.17
  -6  -1  -5    2.39    0.30
  -6  -1  -5    2.42    0.36
   6  -1   5    1.66    0.18
  -6   1  -5    2.52    0.32
   6   1   5    1.69    0.23
  -6   1  -5    3.02    0.41
  -6   1  -5    1.59    0.31
   6   1   5    1.92    0.27
  -7  -1  -5    0.76    0.27
   7  -1   5    0.62    0.14
   7  -1   5    0.76    0.13
  -7  -1  -5    0.19    0.26
  -7  -1  -5    0.77    0.27
  -7   1  -5    0.88    0.34
  -7   1  -5    0.73    0.25
   7   1   5    0.74    0.21
   7   1   5    0.77    0.18
   8  -1   5    1.99    0.24
  -8  -1  -5    2.03    0.39
  -8  -1  -5    1.57    0.34
   8  -1   5    2.03    0.25
  -8   1  -5    1.83    0.34
   8   1   5    2.03    0.28
   8   1   5    1.77    0.26
  -8   1  -5    1.54    0.36
   9  -1   5    0.80    0.18
   9  -1   5    1.14    0.20
  -9  -1  -5    1.88    0.71
  -9  -1  -5    0.91    0.36
  -9   1  -5    0.57    0.43
   9   1   5    1.09    0.28
   9   1   5    1.01    0.27
  -9   1  -5    1.16    0.35
 -10  -1  -5    2.02    0.48
  10  -1   5    1.93    0.23
 -10   1  -5    1.26    0.46
  10   1   5    1.63    0.35
 -11  -1  -5    1.25    0.56
 -11   1  -5    0.88    0.53
  12  -2  -5    3.12    0.56
 -12   2   5    4.39    1.11
  12   2  -5    2.56    0.61
 -11  -2   5    1.46    0.51
  11  -2  -5    0.73    0.39
 -11   2   5    0.34    0.47
  11   2  -5   -0.11    0.43
  10  -2  -5    5.13    0.66
 -10  -2   5    5.85    0.73
  10  -2  -5    4.75    0.59
 -10   2   5    6.04    0.70
  10   2  -5    5.79    0.67
   9  -2  -5    1.03    0.50
   9  -2  -5    1.72    0.41
  -9  -2   5    0.66    0.34
   9  -2  -5    1.04    0.43
  -9   2   5    1.57    0.56
   9   2  -5    1.17    0.41
   9   2  -5    2.03    0.47
   9   2  -5    1.65    0.37
  -9   2   5    1.24    0.36
   8  -2  -5    7.37    0.59
   8  -2  -5    6.38    0.50
  -8  -2   5    6.93    0.59
  -8  -2   5    6.72    0.94
   8  -2  -5    5.47    0.65
   8   2  -5    5.06    0.59
   8   2  -5    6.33    0.61
  -8   2   5    5.70    0.58
  -8   2   5    5.70    0.60
   8   2  -5    6.51    0.56
   7  -2  -5   -0.32    0.23
  -7  -2   5   -0.39    0.23
   7  -2  -5    0.20    0.21
  -7  -2   5   -0.03    0.24
   7   2  -5    0.57    0.25
  -7   2   5   -0.16    0.23
   7   2  -5    0.06    0.22
   7   2  -5   -0.09    0.25
  -7   2   5    0.01    0.22
   6  -2  -5   -0.08    0.16
  -6  -2   5   -0.25    0.17
  -6  -2   5    0.26    0.19
   6  -2  -5    0.07    0.20
  -6   2   5   -0.28    0.18
  -6   2   5   -0.19    0.19
   6   2  -5    0.32    0.22
   6   2  -5    0.14    0.18
   6   2  -5    0.04    0.18
   5  -2  -5    9.05    0.46
  -5  -2   5    8.95    0.54
  -5  -2   5    9.29    0.49
   5  -2  -5   10.14    0.51
  -5   2   5    8.40    0.67
   5   2  -5    9.35    0.48
   5   2  -5    9.64    0.46
   5   2  -5    8.71    0.72
  -5   2   5    9.44    0.47
   4  -2  -5    3.03    0.28
  -4  -2   5    2.76    0.26
   4  -2  -5    3.01    0.25
  -4  -2   5    2.99    0.28
  -4   2   5    2.43    0.27
   4   2  -5    2.37    0.26
  -4   2   5    2.64    0.27
   4   2  -5    2.74    0.27
   4   2  -5    2.41    0.24
   3  -2  -5   73.63    1.97
  -3  -2   5   69.89    1.96
   3  -2  -5   68.73    1.96
  -3  -2   5   68.79    1.94
  -3   2   5   65.29    1.96
   3   2  -5   70.91    1.97
   3   2  -5   67.56    1.97
  -3   2   5   69.14    1.95
  -2  -2   5    3.82    0.20
   2  -2  -5    3.40    0.23
  -2  -2   5    3.67    0.22
  -2   2   5    3.92    0.22
  -2   2   5    3.44    0.23
   2   2  -5    3.72    0.23
   2   2  -5    4.05    0.22
  -1  -2   5   14.20    0.47
  -1  -2   5   16.23    0.45
   1  -2  -5   16.80    0.52
   1  -2  -5   15.34    0.50
   1   2  -5   16.44    0.50
  -1   2   5   15.58    0.52
  -1   2   5   16.86    0.50
   1   2  -5   16.11    0.49
   0  -2  -5   35.77    1.02
   0  -2  -5   37.23    1.04
   0   2   5   35.63    1.01
   0   2   5   37.35    1.04
  -1  -2  -5    5.54    0.24
  -1  -2  -5    5.60    0.22
  -1   2  -5    5.54    0.27
   1   2   5    5.93    0.23
   1   2   5    5.65    0.23
  -2  -2  -5    0.45    0.10
  -2  -2  -5    0.42    0.09
   2   2   5    0.50    0.09
  -2   2  -5    0.43    0.13
   2   2   5    0.44    0.09
  -3  -2  -5    5.40    0.28
  -3  -2  -5    5.75    0.29
  -3   2  -5    6.16    0.37
   3   2   5    5.94    0.28
  -3   2  -5    5.70    0.23
   3   2   5    5.57    0.26
  -3   2  -5    6.01    0.24
  -4  -2  -5    9.05    0.41
  -4  -2  -5    8.55    0.39
  -4  -2  -5    8.94    0.47
  -4   2  -5    8.65    0.36
   4   2   5    9.26    0.40
  -4   2  -5    8.56    0.36
  -4   2  -5    8.11    0.47
   4   2   5    8.01    0.36
  -5  -2  -5   -0.10    0.15
  -5  -2  -5    0.07    0.24
  -5  -2  -5    0.09    0.21
  -5   2  -5   -0.13    0.13
   5   2   5    0.24    0.13
  -5   2  -5    0.08    0.14
   5   2   5    0.29    0.15
  -6  -2  -5    2.57    0.35
  -6  -2  -5    2.90    0.40
  -6  -2  -5    2.82    0.36
   6   2   5    1.87    0.27
   6   2   5    2.61    0.30
  -6   2  -5    2.54    0.34
  -6   2  -5    2.29    0.33
  -7  -2  -5    0.31    0.31
  -7  -2  -5   -0.05    0.24
  -7  -2  -5    0.34    0.26
  -7   2  -5    0.49    0.26
   7   2   5    0.29    0.24
  -7   2  -5    0.09    0.20
   7   2   5    0.25    0.21
  -8  -2  -5   -0.34    0.31
  -8  -2  -5   -0.64    0.32
  -8   2  -5    0.04    0.27
   8   2   5    0.05    0.24
   8   2   5   -0.08    0.22
  -8   2  -5   -0.01    0.30
  -9  -2  -5   -0.08    0.34
  -9   2  -5    0.48    0.35
  -9   2  -5    0.46    0.42
   9   2   5    0.60    0.30
 -10  -2  -5    0.88    0.46
  10   2   5    1.28    0.37
 -10   2  -5    0.51    0.42
 -11  -2  -5    1.59    0.59
 -11   2  -5    0.99    0.52
 -11  -3   5    2.94    0.62
  11  -3  -5    3.92    0.51
 -11   3   5    2.54    0.54
  11   3  -5    2.65    0.58
 -10  -3   5    0.65    0.41
  10  -3  -5    0.54    0.34
  10  -3  -5    1.12    0.50
 -10   3   5    0.12    0.36
  10   3  -5    0.14    0.38
   9  -3  -5   -0.32    0.30
   9  -3  -5    0.07    0.40
  -9  -3   5    0.10    0.35
  -9   3   5    0.57    0.33
   9   3  -5   -0.17    0.37
   9   3  -5   -0.10    0.31
  -8  -3   5   -0.32    0.29
   8  -3  -5    0.09    0.29
   8  -3  -5   -0.12    0.37
  -8  -3   5   -0.68    0.30
   8  -3  -5    0.57    0.24
  -8   3   5   -0.21    0.31
   8   3  -5    0.53    0.32
   8   3  -5    0.35    0.30
   7  -3  -5    0.20    0.20
  -7  -3   5    0.03    0.25
   7  -3  -5    0.11    0.25
  -7  -3   5   -0.09    0.23
  -7   3   5   -0.03    0.27
   7   3  -5    0.03    0.24
   7   3  -5   -0.04    0.26
  -7   3   5    0.22    0.23
   7   3  -5   -0.13    0.22
   6  -3  -5    1.02    0.26
  -6  -3   5    1.05    0.27
  -6  -3   5    1.00    0.29
   6  -3  -5    1.21    0.23
  -6   3   5    0.92    0.40
   6   3  -5    1.44    0.47
   6   3  -5    1.13    0.23
  -6   3   5    0.79    0.24
   6   3  -5    1.10    0.25
  -5  -3   5   31.91    1.12
   5  -3  -5   35.01    1.10
  -5  -3   5   33.28    1.21
   5   3  -5   34.51    1.14
  -5   3   5   32.89    1.12
   5   3  -5   33.58    1.06
  -5   3   5   34.40    1.11
   5   3  -5   32.70    1.12
   4  -3  -5   32.85    1.08
  -4  -3   5   32.51    1.08
  -4  -3   5   33.01    1.05
   4  -3  -5   33.78    1.07
   4   3  -5   33.86    1.10
  -4   3   5   36.25    1.08
   4   3  -5   34.05    1.03
  -4   3   5   34.32    1.09
   4   3  -5   33.93    1.09
   3  -3  -5    1.97    0.24
  -3  -3   5    2.32    0.20
   3  -3  -5    1.93    0.22
  -3  -3   5    2.02    0.23
   3   3  -5    1.78    0.21
  -3   3   5    2.07    0.22
   3   3  -5    2.17    0.24
  -3   3   5    2.07    0.23
   3   3  -5    2.12    0.17
  -2  -3   5    0.30    0.08
  -2  -3   5    0.23    0.11
   2  -3  -5    0.02    0.10
   2  -3  -5    0.25    0.10
  -2   3   5    0.16    0.09
  -2   3   5    0.09    0.10
   2   3  -5    0.24    0.10
   2   3  -5    0.23    0.10
   1  -3  -5    2.28    0.18
  -1  -3   5    1.97    0.20
  -1  -3   5    2.00    0.10
   1  -3  -5    2.25    0.18
   1   3  -5    2.16    0.14
   1   3  -5    2.10    0.16
  -1   3   5    2.26    0.19
  -1   3   5    2.04    0.17
   0  -3  -5    2.80    0.18
   0  -3  -5    2.79    0.19
   0   3  -5    2.54    0.17
   0   3   5    2.56    0.18
   0   3   5    2.79    0.16
   0   3  -5    2.76    0.11
   0   3  -5    2.50    0.13
  -1  -3  -5    0.33    0.09
  -1  -3  -5    0.25    0.09
   1   3   5    0.32    0.08
  -1   3  -5    0.44    0.11
   1   3   5    0.43    0.10
  -2  -3  -5    0.01    0.09
  -2  -3  -5    0.09    0.08
  -2   3  -5    0.13    0.11
   2   3   5    0.17    0.09
   2   3   5    0.14    0.09
  -3  -3  -5    1.09    0.14
  -3  -3  -5    1.12    0.17
   3   3   5    1.00    0.14
   3   3   5    0.92    0.15
  -3   3  -5    1.11    0.11
  -3   3  -5    0.99    0.11
  -4  -3  -5    4.53    0.29
   4  -3   5    4.64    0.36
  -4  -3  -5    4.72    0.32
  -4   3  -5    4.02    0.26
   4   3   5    4.77    0.31
  -4   3  -5    4.89    0.25
   4   3   5    3.85    0.27
  -5  -3  -5    0.10    0.16
  -5  -3  -5   -0.02    0.16
  -5  -3  -5   -0.22    0.20
  -5   3  -5    0.03    0.14
   5   3   5    0.19    0.15
   5   3   5    0.16    0.15
  -5   3  -5   -0.03    0.14
  -6  -3  -5   29.21    1.06
  -6  -3  -5   29.88    1.02
  -6  -3  -5   28.89    1.12
  -6   3  -5   28.77    0.99
   6   3   5   28.76    1.00
  -6   3  -5   28.72    0.99
  -7  -3  -5   -0.21    0.23
  -7  -3  -5    0.32    0.30
  -7  -3  -5    0.29    0.24
  -7   3  -5   -0.04    0.24
   7   3   5   -0.34    0.20
   7   3   5    0.31    0.21
  -7   3  -5   -0.10    0.21
  -8  -3  -5    0.14    0.32
  -8  -3  -5    0.33    0.28
  -8  -3  -5   -0.06    0.32
   8   3   5    0.35    0.39
   8   3   5    0.18    0.26
  -8   3  -5   -0.01    0.26
  -8   3  -5    0.21    0.33
  -9  -3  -5    0.22    0.37
  -9   3  -5    0.14    0.33
   9   3   5    0.11    0.32
   9   3   5    0.41    0.32
  -9   3  -5    0.43    0.45
 -10  -3  -5   -0.27    0.45
  10   3   5    0.57    0.59
 -10   3  -5    1.69    0.45
  10   3   5   -0.05    0.39
 -11   3  -5    0.79    0.55
  11   3   5    0.49    0.63
 -11  -4   5    0.51    0.53
  11  -4  -5   -0.59    0.36
 -11   4   5   -0.35    0.46
  11   4  -5    0.26    0.54
  10  -4  -5    1.31    0.52
 -10  -4   5    2.56    0.51
  10  -4  -5    1.89    0.37
  10   4  -5    1.55    0.46
 -10   4   5    2.22    0.47
   9  -4  -5    0.70    0.39
  -9  -4   5    1.09    0.38
   9  -4  -5    0.90    0.31
   9   4  -5    0.62    0.36
  -9   4   5    1.51    0.36
  -8  -4   5    0.16    0.29
   8  -4  -5    0.47    0.25
  -8  -4   5    0.56    0.30
   8  -4  -5    0.24    0.31
   8   4  -5    0.03    0.34
  -8   4   5    0.56    0.30
   8   4  -5    0.49    0.29
  -8   4   5    0.53    0.36
  -7  -4   5   -0.03    0.25
   7  -4  -5    0.06    0.20
   7  -4  -5   -0.10    0.23
  -7  -4   5    0.00    0.24
  -7   4   5    0.07    0.27
   7   4  -5   -0.06    0.24
   7   4  -5    0.10    0.27
  -7   4   5   -0.08    0.22
   6  -4  -5    0.23    0.19
  -6  -4   5    0.68    0.24
   6  -4  -5    0.47    0.23
  -6  -4   5    0.12    0.22
  -6   4   5    0.12    0.23
  -6   4   5    0.31    0.23
   6   4  -5    0.25    0.22
   6   4  -5    0.36    0.23
  -5  -4   5    4.67    0.41
  -5  -4   5    5.44    0.37
   5  -4  -5    5.02    0.40
   5  -4  -5    4.89    0.35
   5   4  -5    5.38    0.40
   5   4  -5    5.56    0.42
  -5   4   5    5.16    0.40
  -5   4   5    5.04    0.39
   4  -4  -5    2.29    0.25
  -4  -4   5    2.08    0.29
  -4  -4   5    2.43    0.25
   4  -4  -5    1.98    0.29
  -4   4   5    2.91    0.31
   4   4  -5    2.55    0.27
  -4   4   5    2.46    0.28
   4   4  -5    2.90    0.31
  -3  -4   5   13.45    0.53
  -3  -4   5   13.49    0.47
   3  -4  -5   13.05    0.53
   3  -4  -5   13.22    0.51
   3   4  -5   13.23    0.54
   3   4  -5   13.79    0.52
  -3   4   5   13.59    0.51
  -3   4   5   13.30    0.54
   2  -4  -5   12.82    0.48
   2  -4  -5   12.70    0.47
  -2  -4   5   12.20    0.46
  -2  -4   5   12.62    0.41
  -2   4   5   12.60    0.45
   2   4  -5   12.77    0.48
   2   4  -5   12.24    0.45
  -2   4   5   12.05    0.48
  -1  -4   5   26.63    0.75
   1  -4  -5   25.87    0.78
  -1  -4   5   25.26    0.71
   1  -4  -5   26.50    0.81
   1   4  -5   24.62    0.74
   1   4  -5   26.05    0.78
  -1   4   5   23.71    0.80
  -1   4   5   25.87    0.78
   0  -4  -5    0.20    0.09
   0  -4  -5    0.23    0.10
   0   4  -5    0.23    0.07
   0   4   5    0.21    0.09
   0   4  -5    0.35    0.06
   0   4   5    0.07    0.09
  -1  -4  -5    5.20    0.25
  -1  -4  -5    5.05    0.28
   1   4   5    5.25    0.25
  -1   4  -5    4.86    0.18
   1   4   5    5.18    0.27
  -1   4  -5    5.02    0.19
  -2  -4  -5    0.35    0.10
   2  -4   5    0.31    0.13
  -2  -4  -5    0.38    0.13
   2   4   5    0.40    0.12
   2   4   5    0.48    0.11
  -2   4  -5    0.26    0.08
  -2   4  -5    0.47    0.06
  -3  -4  -5   15.65    0.61
  -3  -4  -5   15.87    0.55
   3  -4   5   16.13    0.63
   3   4   5   15.97    0.57
  -3   4  -5   15.87    0.49
   3   4   5   15.64    0.58
  -3   4  -5   15.96    0.51
  -4  -4  -5    4.20    0.30
   4  -4   5    4.48    0.44
  -4  -4  -5    4.14    0.34
  -4   4  -5    3.86    0.24
  -4   4  -5    3.80    0.26
   4   4   5    3.87    0.30
   4   4   5    4.02    0.31
   5  -4   5    2.12    0.31
  -5  -4  -5    2.07    0.29
  -5  -4  -5    2.09    0.30
  -5  -4  -5    1.85    0.29
   5   4   5    2.17    0.26
  -5   4  -5    2.16    0.26
  -5   4  -5    2.03    0.23
   5   4   5    2.15    0.32
  -6  -4  -5    1.93    0.35
  -6  -4  -5    1.70    0.31
  -6  -4  -5    1.73    0.27
   6  -4   5    1.77    0.34
  -6   4  -5    1.28    0.23
   6   4   5    1.66    0.28
  -6   4  -5    1.86    0.26
   6   4   5    1.97    0.26
  -7  -4  -5    0.02    0.25
  -7  -4  -5    0.30    0.25
   7   4   5    0.53    0.24
   7   4   5    0.19    0.23
  -7   4  -5   -0.25    0.21
  -7   4  -5    0.00    0.26
  -8  -4  -5    0.03    0.33
  -8  -4  -5   -0.35    0.31
  -8  -4  -5   -0.12    0.34
   8   4   5   -0.02    0.27
  -8   4  -5    0.72    0.35
  -8   4  -5    0.10    0.28
   8   4   5   -0.07    0.27
  -9  -4  -5    1.68    0.46
  -9  -4  -5    0.51    0.48
   9   4   5    1.66    0.38
  -9   4  -5    1.90    0.38
  -9   4  -5    1.12    0.51
   9   4   5    1.38    0.40
 -10  -4  -5    0.82    0.51
  10   4   5    0.72    0.45
 -10   4  -5    0.45    0.43
  10   4   5    1.74    0.75
  11  -5  -5    1.23    0.44
 -11  -5   5    1.90    0.60
  11   5  -5    1.92    0.58
 -11   5   5    1.27    0.53
  10  -5  -5   -0.42    0.52
  10  -5  -5    0.65    0.34
 -10  -5   5    0.40    0.44
 -10   5   5    0.53    0.40
  10   5  -5    1.19    0.46
   9  -5  -5    0.76    0.30
   9  -5  -5    1.40    0.42
  -9  -5   5    0.93    0.39
  -9   5   5    1.51    0.37
   9   5  -5    0.79    0.39
  -8  -5   5    0.90    0.33
  -8  -5   5    0.47    0.33
   8  -5  -5    0.79    0.34
   8  -5  -5    0.66    0.25
  -8   5   5    0.61    0.38
   8   5  -5    1.29    0.41
  -8   5   5    0.74    0.29
   8   5  -5    0.36    0.29
   7  -5  -5    0.11    0.21
  -7  -5   5    0.23    0.24
   7  -5  -5    0.75    0.30
  -7  -5   5   -0.10    0.27
  -7   5   5    0.53    0.31
   7   5  -5    0.17    0.30
   7   5  -5    0.17    0.27
  -7   5   5    0.24    0.25
  -6  -5   5    6.68    0.53
   6  -5  -5    8.02    0.61
   6  -5  -5    7.23    0.45
  -6  -5   5    6.36    0.46
  -6   5   5    7.50    0.54
  -6   5   5    8.29    0.51
   6   5  -5    6.53    0.51
   6   5  -5    6.82    0.55
   5  -5  -5    0.00    0.15
   5  -5  -5   -0.06    0.19
  -5  -5   5    0.11    0.20
  -5  -5   5    0.01    0.15
  -5   5   5    0.27    0.20
  -5   5   5    0.01    0.18
   5   5  -5    0.03    0.22
   5   5  -5    0.37    0.19
   4  -5  -5    5.64    0.34
  -4  -5   5    5.16    0.38
  -4  -5   5    5.03    0.31
   4   5  -5    5.14    0.38
  -4   5   5    4.77    0.36
  -4   5   5    5.18    0.37
   4   5  -5    4.89    0.36
   3  -5  -5    0.04    0.14
  -3  -5   5    0.04    0.09
  -3  -5   5   -0.12    0.12
   3  -5  -5   -0.02    0.11
  -3   5   5   -0.06    0.11
  -3   5   5    0.12    0.12
   3   5  -5    0.08    0.13
   3   5  -5    0.02    0.12
  -2  -5   5    0.20    0.13
  -2  -5   5    0.25    0.09
   2  -5  -5    0.27    0.13
   2  -5  -5    0.39    0.14
  -2   5   5    0.30    0.11
   2   5  -5    0.37    0.13
  -2   5   5    0.13    0.12
   2   5  -5    0.34    0.11
  -1  -5   5    8.60    0.30
  -1  -5   5    8.79    0.34
   1  -5  -5    9.03    0.39
   1  -5  -5    9.10    0.37
   1   5  -5    8.91    0.37
   1   5  -5    8.86    0.33
  -1   5   5    8.99    0.39
   0  -5  -5    0.70    0.12
   0  -5  -5    0.55    0.12
   0   5  -5    0.89    0.12
   0   5   5    0.69    0.13
   0   5  -5    0.94    0.11
   0   5   5    0.66    0.11
  -1  -5  -5    6.47    0.31
   1  -5   5    6.24    0.29
  -1  -5  -5    6.77    0.34
  -1   5  -5    6.43    0.24
   1   5   5    6.26    0.33
   1   5   5    6.39    0.30
  -1   5  -5    6.35    0.26
  -2  -5  -5    1.65    0.19
  -2  -5  -5    1.23    0.17
   2  -5   5    1.43    0.18
   2   5   5    1.73    0.21
  -2   5  -5    1.52    0.14
  -2   5  -5    1.37    0.12
   2   5   5    1.49    0.22
  -3  -5  -5    1.75    0.22
   3  -5   5    1.90    0.24
  -3  -5  -5    1.80    0.26
  -3   5  -5    1.54    0.18
   3   5   5    2.52    0.26
  -3   5  -5    1.91    0.15
   3   5   5    1.99    0.25
   4  -5   5    0.93    0.43
  -4  -5  -5    0.93    0.21
  -4  -5  -5    1.08    0.18
  -4   5  -5    0.94    0.16
   4   5   5    1.39    0.21
   4   5   5    1.02    0.20
  -4   5  -5    0.98    0.15
   5  -5   5    2.59    0.42
  -5  -5  -5    2.85    0.33
  -5  -5  -5    2.10    0.30
  -5   5  -5    3.01    0.28
   5   5   5    2.31    0.33
  -5   5  -5    2.22    0.29
   5   5   5    3.42    0.34
   6  -5   5    0.98    0.35
  -6  -5  -5    0.66    0.23
  -6  -5  -5    0.88    0.29
  -6  -5  -5    0.64    0.24
   6   5   5    1.19    0.26
  -6   5  -5    0.81    0.22
   6   5   5    0.91    0.24
  -7  -5  -5   -0.33    0.26
  -7  -5  -5    0.58    0.30
  -7  -5  -5    0.54    0.36
   7  -5   5    0.16    0.39
  -7   5  -5    0.69    0.45
   7   5   5    0.49    0.27
   7   5   5    0.09    0.25
  -7   5  -5    0.46    0.25
  -8  -5  -5    1.00    0.38
  -8  -5  -5    1.22    0.42
  -8   5  -5    1.38    0.33
   8   5   5    0.67    0.33
   8   5   5    1.06    0.34
  -8   5  -5    1.41    0.39
  -9  -5  -5    0.10    0.47
  -9  -5  -5   -0.21    0.41
   9   5   5    0.05    0.36
   9   5   5    0.76    0.41
  -9   5  -5    0.45    0.50
  -9   5  -5    0.68    0.37
 -10  -5  -5    5.35    0.71
 -10   5  -5    8.13    0.83
  10   5   5    6.29    0.81
 -11  -6   5   -0.04    0.61
  11  -6  -5    0.54    0.42
  11   6  -5   -0.10    0.58
 -10  -6   5    1.34    0.54
  10  -6  -5    1.22    0.57
  10  -6  -5    1.07    0.36
  10   6  -5    0.70    0.50
 -10   6   5    0.47    0.39
   9  -6  -5    0.55    0.29
  -9  -6   5    0.37    0.41
   9  -6  -5   -0.15    0.42
   9   6  -5    0.43    0.39
  -9   6   5    0.88    0.37
  -8  -6   5    4.95    0.66
  -8  -6   5    4.31    0.59
   8  -6  -5    4.36    0.49
   8  -6  -5    3.95    0.46
  -8   6   5    5.31    0.68
  -8   6   5    3.81    0.51
   8   6  -5    3.44    0.47
   7  -6  -5    0.13    0.21
   7  -6  -5    0.66    0.30
  -7  -6   5    0.15    0.26
  -7   6   5    0.50    0.43
   7   6  -5    0.07    0.28
   7   6  -5    0.00    0.33
  -7   6   5    0.56    0.34
  -6  -6   5    0.11    0.20
  -6  -6   5   -0.28    0.23
   6  -6  -5   -0.25    0.22
   6  -6  -5   -0.08    0.18
   6   6  -5   -0.07    0.28
  -6   6   5    0.18    0.23
  -6   6   5   -0.21    0.24
   6   6  -5    0.07    0.23
  -5  -6   5    2.08    0.26
   5  -6  -5    2.04    0.30
  -5  -6   5    1.99    0.31
   5  -6  -5    1.86    0.28
  -5   6   5    1.90    0.29
   5   6  -5    2.05    0.31
   5   6  -5    1.89    0.29
  -5   6   5    1.64    0.25
  -4  -6   5    0.25    0.20
   4  -6  -5    0.19    0.15
   4  -6  -5    0.09    0.19
  -4   6   5    0.19    0.19
  -4   6   5    0.20    0.17
   4   6  -5    0.26    0.18
   4   6  -5    0.52    0.20
  -3  -6   5    0.15    0.11
   3  -6  -5    0.12    0.13
  -3  -6   5   -0.26    0.14
   3   6  -5    0.04    0.14
  -3   6   5    0.00    0.14
  -3   6   5    0.10    0.16
   3   6  -5    0.13    0.19
  -2  -6   5    1.59    0.17
   2  -6  -5    1.54    0.20
  -2  -6   5    1.57    0.19
   2  -6  -5    1.48    0.21
   2   6  -5    1.62    0.24
   2   6  -5    1.62    0.21
  -2   6   5    1.48    0.22
  -1  -6   5    0.21    0.11
  -1  -6   5    0.13    0.08
   1  -6  -5    0.26    0.12
   1  -6  -5    0.21    0.14
   1   6  -5    0.18    0.12
  -1   6   5    0.30    0.12
  -1   6   5   -0.08    0.12
   1   6  -5    0.22    0.09
   0  -6   5   -0.07    0.06
   0  -6   5   -0.06    0.07
   0  -6  -5   -0.10    0.10
   0  -6  -5   -0.11    0.10
   0   6   5    0.00    0.09
   0   6   5    0.05    0.12
   0   6  -5    0.03    0.07
   0   6  -5    0.01    0.10
   1  -6   5    1.01    0.14
  -1  -6  -5    0.72    0.16
  -1   6  -5    0.82    0.12
  -1   6  -5    0.71    0.11
   1   6   5    0.93    0.18
   1   6   5    0.54    0.13
  -2  -6  -5    6.13    0.33
  -2  -6  -5    5.68    0.37
   2  -6   5    6.03    0.35
   2   6   5    6.24    0.39
  -2   6  -5    6.49    0.26
  -2   6  -5    6.20    0.27
   2   6   5    5.63    0.33
   3  -6   5    2.01    0.26
  -3  -6  -5    2.31    0.25
  -3  -6  -5    1.40    0.22
  -3   6  -5    2.00    0.18
  -3   6  -5    1.65    0.20
   3   6   5    1.76    0.23
   3   6   5    1.90    0.28
   4  -6   5    0.29    0.22
  -4  -6  -5    0.12    0.19
  -4  -6  -5    0.07    0.16
   4   6   5   -0.10    0.17
  -4   6  -5    0.03    0.12
  -4   6  -5   -0.02    0.13
   4   6   5   -0.16    0.16
  -5  -6  -5    0.78    0.20
   5  -6   5    0.61    0.29
  -5  -6  -5    0.61    0.24
   5   6   5    0.71    0.22
  -5   6  -5    0.72    0.19
  -5   6  -5    0.66    0.19
   5   6   5    0.69    0.22
   6  -6   5    0.11    0.33
  -6  -6  -5    0.48    0.28
  -6  -6  -5   -0.20    0.22
  -6  -6  -5    0.39    0.36
   6   6   5    0.43    0.24
  -6   6  -5   -0.04    0.21
   6   6   5   -0.11    0.24
  -6   6  -5    0.48    0.20
  -7  -6  -5    0.51    0.32
   7  -6   5    0.98    0.44
  -7  -6  -5    0.29    0.28
  -7  -6  -5    0.84    0.33
   7   6   5    0.58    0.30
   7   6   5    0.51    0.29
  -7   6  -5    0.38    0.24
  -7   6  -5    0.18    0.29
  -8  -6  -5    0.23    0.40
  -8  -6  -5    0.57    0.40
  -8   6  -5    0.26    0.40
  -8   6  -5    0.70    0.31
   8   6   5    0.56    0.34
   8   6   5    0.98    0.38
  -9  -6  -5    1.97    0.54
  -9  -6  -5    3.29    0.56
  -9   6  -5    3.45    0.71
   9   6   5    2.46    0.50
  -9   6  -5    3.30    0.44
 -10  -6  -5    0.36    0.58
 -10   6  -5    0.39    0.45
  10   6   5   -0.43    0.50
 -10  -7   5    0.57    0.52
  10  -7  -5   -0.25    0.66
  10  -7  -5   -0.29    0.34
 -10   7   5   -0.27    0.39
  10   7  -5    1.06    0.54
   9  -7  -5   -0.13    0.43
   9  -7  -5   -0.10    0.30
  -9  -7   5   -0.07    0.39
  -9   7   5    0.62    0.35
   9   7  -5   -0.01    0.42
   8  -7  -5    1.09    0.40
   8  -7  -5    1.12    0.30
  -8  -7   5    0.12    0.37
  -8   7   5    1.12    0.33
   8   7  -5    0.68    0.34
  -7  -7   5    0.54    0.28
  -7  -7   5    0.84    0.34
   7  -7  -5   -0.10    0.30
   7  -7  -5    0.50    0.23
   7   7  -5   -0.38    0.36
  -7   7   5    1.13    0.37
  -7   7   5    0.45    0.26
   7   7  -5    0.37    0.29
   6  -7  -5    8.55    0.60
  -6  -7   5    8.61    0.61
   6  -7  -5    9.53    0.51
  -6  -7   5    8.84    0.51
   6   7  -5    8.12    0.64
  -6   7   5    8.40    0.53
   6   7  -5    8.13    0.59
  -6   7   5    8.91    0.62
  -5  -7   5    3.69    0.35
   5  -7  -5    3.29    0.63
   5  -7  -5    3.78    0.37
  -5  -7   5    4.19    0.47
   5   7  -5    4.12    0.42
   5   7  -5    4.50    0.49
  -5   7   5    3.67    0.44
  -5   7   5    3.77    0.40
   4  -7  -5    4.68    0.41
  -4  -7   5    4.26    0.31
   4  -7  -5    4.84    0.36
  -4  -7   5    4.58    0.42
  -4   7   5    4.42    0.41
  -4   7   5    4.75    0.36
   4   7  -5    5.02    0.48
   4   7  -5    4.43    0.39
  -3  -7   5    0.12    0.12
  -3  -7   5   -0.05    0.17
   3  -7  -5    0.02    0.19
   3  -7  -5    0.17    0.16
  -3   7   5    0.48    0.19
  -3   7   5    0.03    0.14
   3   7  -5    0.22    0.18
   3   7  -5    0.00    0.15
  -2  -7   5    2.84    0.29
   2  -7  -5    2.43    0.27
  -2  -7   5    2.74    0.22
   2  -7  -5    2.54    0.30
   2   7  -5    2.83    0.26
   2   7  -5    3.24    0.32
  -2   7   5    2.59    0.30
  -2   7   5    2.68    0.28
   1  -7  -5    0.81    0.17
   1  -7  -5    0.80    0.17
  -1  -7   5    0.78    0.15
  -1  -7   5    0.59    0.11
   1   7  -5    0.70    0.13
   1   7  -5    0.69    0.17
  -1   7   5    0.19    0.15
  -1   7   5    0.65    0.17
   0  -7   5   11.16    0.38
   0  -7   5   10.78    0.37
   0  -7  -5   10.27    0.50
   0  -7   5   11.29    0.39
   0  -7  -5   11.75    0.47
   0   7   5   11.42    0.50
   0   7  -5   11.15    0.45
   0   7  -5   11.32    0.41
   0   7   5   11.75    0.46
  -1  -7  -5    5.83    0.33
   1  -7   5    5.35    0.30
  -1  -7  -5    5.46    0.37
  -1   7  -5    5.26    0.29
   1   7   5    5.05    0.36
   1   7   5    5.50    0.32
   2  -7   5    0.26    0.16
  -2  -7  -5    0.04    0.14
  -2  -7  -5    0.40    0.16
   2   7   5    0.09    0.17
  -2   7  -5    0.06    0.10
   2   7   5    0.03    0.14
  -2   7  -5    0.04    0.10
   3  -7   5    1.82    0.26
  -3  -7  -5    1.46    0.24
  -3  -7  -5    2.04    0.28
  -3   7  -5    1.41    0.20
  -3   7  -5    1.52    0.21
   3   7   5    2.23    0.31
  -4  -7  -5    1.25    0.25
  -4  -7  -5    0.86    0.21
   4  -7   5    0.80    0.27
  -4   7  -5    1.27    0.18
   4   7   5    1.25    0.25
   4   7   5    1.15    0.24
  -4   7  -5    0.87    0.17
   5  -7   5    4.53    0.53
  -5  -7  -5    5.90    0.42
  -5  -7  -5    5.89    0.52
  -5   7  -5    6.04    0.37
   5   7   5    6.14    0.48
  -5   7  -5    4.96    0.44
   5   7   5    6.18    0.48
  -6  -7  -5    1.52    0.35
  -6  -7  -5    1.01    0.29
  -6  -7  -5    1.64    0.34
   6  -7   5    1.56    0.39
   6   7   5    1.49    0.31
  -6   7  -5    1.60    0.26
  -6   7  -5    1.04    0.28
   6   7   5    1.65    0.32
   7  -7   5    0.93    0.47
  -7  -7  -5    2.07    0.41
  -7  -7  -5    1.42    0.41
   7   7   5    2.71    0.41
   7   7   5    1.96    0.38
  -7   7  -5    1.82    0.37
  -7   7  -5    1.32    0.29
  -8  -7  -5   -0.06    0.41
  -8  -7  -5    0.55    0.39
  -8   7  -5    0.82    0.47
   8   7   5    1.21    0.42
  -8   7  -5    0.95    0.31
  -9  -7  -5    7.19    0.91
  -9  -7  -5    5.43    0.69
  -9   7  -5    6.71    0.68
   9   7   5    6.89    0.79
  10   7   5    0.69    0.55
 -10   7  -5    1.89    0.51
 -10  -8   5    0.59    0.57
  10  -8  -5    0.97    0.41
  10   8  -5    0.96    0.58
 -10   8   5    0.79    0.45
  -9  -8   5    0.96    0.46
   9  -8  -5    1.07    0.34
   9  -8  -5    1.47    0.53
  -9   8   5    0.56    0.39
   9   8  -5    1.66    0.50
   8  -8  -5    3.13    0.48
   8  -8  -5    1.85    0.39
  -8  -8   5    2.57    0.49
  -8   8   5    3.80    0.52
   8   8  -5    2.29    0.48
  -7  -8   5    0.53    0.27
  -7  -8   5    0.45    0.36
   7  -8  -5    0.36    0.35
   7  -8  -5    0.55    0.25
   7   8  -5   -0.20    0.31
  -7   8   5    0.37    0.26
   6  -8  -5    3.64    0.53
   6  -8  -5    3.48    0.39
  -6  -8   5    2.95    0.39
  -6  -8   5    3.59    0.53
   6   8  -5    2.95    0.40
   6   8  -5    3.38    0.49
  -6   8   5    3.14    0.44
  -6   8   5    3.61    0.45
  -5  -8   5    4.63    0.37
  -5  -8   5    5.12    0.53
   5  -8  -5    5.36    0.49
   5  -8  -5    4.80    0.41
  -5   8   5    5.10    0.41
   5   8  -5    4.72    0.53
  -5   8   5    5.94    0.52
   5   8  -5    4.30    0.45
  -4  -8   5    3.73    0.31
   4  -8  -5    3.86    0.36
   4  -8  -5    3.86    0.42
  -4  -8   5    3.62    0.43
   4   8  -5    3.72    0.39
   4   8  -5    3.71    0.46
  -4   8   5    3.51    0.43
  -4   8   5    2.93    0.36
   3  -8  -5    1.23    0.30
   3  -8  -5    1.04    0.21
  -3  -8   5    1.33    0.25
  -3   8   5    1.31    0.26
   3   8  -5    1.14    0.22
  -3   8   5    1.25    0.21
   3   8  -5    1.57    0.49
   2  -8  -5    3.74    0.34
   2  -8  -5    3.86    0.35
  -2  -8   5    3.67    0.27
  -2  -8   5    3.39    0.33
   2   8  -5    3.71    0.36
  -2   8   5    3.88    0.34
   2   8  -5    3.75    0.30
  -2   8   5    2.83    0.35
  -1  -8   5    0.58    0.16
   1  -8  -5    0.42    0.19
  -1  -8   5    0.63    0.12
   1  -8  -5    0.58    0.18
  -1   8   5    0.51    0.16
  -1   8   5    0.39    0.24
   1   8  -5    0.48    0.14
   0  -8   5    3.89    0.22
   0  -8   5    4.05    0.24
   0  -8  -5    4.35    0.36
   0  -8  -5    4.07    0.37
   0  -8   5    4.45    0.26
   0   8   5    3.78    0.41
   0   8  -5    4.68    0.32
   0   8   5    4.64    0.32
   0   8  -5    4.56    0.27
  -1  -8  -5    0.13    0.18
   1  -8   5    0.39    0.15
  -1  -8  -5    0.30    0.16
   1   8   5    0.07    0.18
  -1   8  -5    0.35    0.12
  -1   8  -5    0.40    0.14
   1   8   5    0.42    0.17
   2  -8   5    0.55    0.19
  -2  -8  -5    0.26    0.21
  -2   8  -5    0.75    0.15
   2   8   5    0.91    0.20
  -2   8  -5    0.67    0.15
   2   8   5    0.53    0.21
  -3  -8  -5    0.80    0.20
  -3  -8  -5    0.73    0.22
   3  -8   5    0.60    0.23
  -3   8  -5    0.49    0.15
   3   8   5    0.92    0.22
  -3   8  -5    0.71    0.16
   3   8   5    0.72    0.22
  -4  -8  -5    0.35    0.22
   4  -8   5    0.20    0.26
  -4  -8  -5    0.18    0.24
   4   8   5    0.50    0.22
   4   8   5    0.90    0.26
  -4   8  -5    0.75    0.19
  -4   8  -5    0.61    0.16
   5  -8   5    2.40    0.38
  -5  -8  -5    1.30    0.26
  -5  -8  -5    1.25    0.32
  -5   8  -5    1.75    0.23
   5   8   5    1.34    0.46
  -5   8  -5    1.83    0.26
   5   8   5    1.99    0.34
   6  -8   5   -0.26    0.38
  -6  -8  -5    0.03    0.32
   6   8   5    0.31    0.29
  -6   8  -5    0.81    0.28
   6   8   5    0.84    0.34
  -6   8  -5    0.33    0.20
  -7  -8  -5    0.75    0.37
  -7  -8  -5    0.52    0.38
  -7   8  -5    0.88    0.26
   7   8   5    0.69    0.35
  -7   8  -5    1.24    0.39
  -8  -8  -5    0.42    0.43
  -8  -8  -5    0.32    0.45
   8   8   5    1.46    0.44
  -8   8  -5    1.06    0.51
  -8   8  -5    0.88    0.34
  -9  -8  -5   -0.19    0.56
  -9  -8  -5    0.53    0.53
  -9   8  -5    1.08    0.39
   9   8   5    0.20    0.48
 -10  -9   5    1.69    0.74
  10  -9  -5    0.18    0.42
 -10   9   5    0.91    0.45
   9  -9  -5    0.62    0.38
  -9  -9   5    1.14    0.54
   9  -9  -5    2.13    0.66
  -9   9   5    1.38    0.41
   9   9  -5    1.25    0.51
   8  -9  -5    0.74    0.47
  -8  -9   5    0.53    0.44
   8  -9  -5   -0.26    0.29
  -8   9   5    0.16    0.29
   8   9  -5    0.34    0.42
   7  -9  -5    1.38    0.40
   7  -9  -5    0.33    0.30
  -7  -9   5    0.84    0.38
   7   9  -5    0.00    0.31
  -7   9   5    0.55    0.28
   6  -9  -5   10.04    0.57
  -6  -9   5    9.30    0.72
  -6  -9   5    9.88    0.57
   6  -9  -5   11.77    0.72
  -6   9   5    9.66    0.74
  -6   9   5    9.48    0.58
   6   9  -5    9.92    0.68
   5  -9  -5    0.82    0.29
  -5  -9   5    1.06    0.23
  -5  -9   5    1.28    0.31
   5  -9  -5    1.12    0.25
  -5   9   5    1.00    0.26
   5   9  -5    0.75    0.27
   5   9  -5    1.02    0.36
  -5   9   5    0.55    0.33
  -4  -9   5    1.46    0.30
   4  -9  -5    1.72    0.29
  -4  -9   5    1.16    0.21
   4  -9  -5    1.13    0.25
   4   9  -5    1.14    0.30
   4   9  -5    1.18    0.28
  -4   9   5    1.22    0.31
  -4   9   5    0.87    0.22
  -3  -9   5    0.34    0.16
  -3  -9   5    0.34    0.22
   3  -9  -5    0.32    0.23
   3  -9  -5    0.55    0.21
   3   9  -5    0.32    0.25
  -3   9   5   -0.24    0.22
   3   9  -5    0.25    0.19
  -3   9   5    0.19    0.19
   2  -9  -5    0.80    0.22
  -2  -9   5    1.45    0.24
  -2  -9   5    1.11    0.17
   2  -9  -5    1.40    0.25
  -2   9   5    1.24    0.23
   2   9  -5    0.94    0.20
   2   9  -5    0.83    0.24
  -2   9   5    0.90    0.26
  -1  -9   5   13.25    0.49
   1  -9  -5   13.25    0.63
  -1  -9   5   13.61    0.56
   1  -9  -5   14.42    0.60
  -1   9   5   13.82    0.58
   1   9  -5   13.83    0.55
   1   9  -5   13.62    0.61
  -1   9   5   13.39    0.63
   0  -9  -5    0.26    0.17
   0  -9  -5    0.19    0.18
   0  -9   5    0.13    0.14
   0  -9   5    0.41    0.13
   0  -9   5    0.27    0.12
   0   9  -5    0.16    0.14
   0   9  -5    0.00    0.17
   0   9   5    0.31    0.17
   0   9   5    0.17    0.19
   1  -9   5    0.48    0.17
  -1  -9  -5    0.08    0.20
  -1  -9  -5    0.42    0.19
   1   9   5    0.35    0.16
  -1   9  -5    0.33    0.14
   1   9   5    0.01    0.19
  -1   9  -5    0.45    0.17
  -2  -9  -5    0.22    0.20
  -2  -9  -5    0.26    0.18
   2  -9   5    0.35    0.20
   2   9   5    0.34    0.19
  -2   9  -5    0.48    0.19
   2   9   5    0.40    0.22
   3  -9   5    0.50    0.46
  -3  -9  -5   -0.09    0.22
  -3  -9  -5    0.40    0.20
   3   9   5    0.16    0.23
  -3   9  -5    0.46    0.17
   3   9   5    0.13    0.20
  -3   9  -5    0.18    0.14
   4  -9   5    7.39    0.91
  -4  -9  -5    6.42    0.55
  -4  -9  -5    5.15    0.45
   4   9   5    5.89    0.52
  -4   9  -5    5.90    0.42
  -4   9  -5    5.95    0.36
   4   9   5    6.84    0.54
  -5  -9  -5    1.43    0.34
   5  -9   5    1.16    0.37
   5   9   5    0.42    0.34
  -5   9  -5    0.78    0.20
  -5   9  -5    1.17    0.42
   5   9   5    1.27    0.32
  -6  -9  -5    1.13    0.37
  -6  -9  -5    0.35    0.37
   6  -9   5    0.46    0.43
   6   9   5    0.53    0.31
  -6   9  -5    1.18    0.35
  -6   9  -5    1.43    0.25
  -7  -9  -5    6.52    0.78
  -7  -9  -5    7.51    0.75
   7   9   5    5.98    0.69
  -7   9  -5    6.70    0.73
  -7   9  -5    8.61    0.54
  -8  -9  -5   -0.21    0.45
  -8  -9  -5   -0.09    0.48
   8   9   5    0.38    0.45
  -8   9  -5    0.34    0.32
  -9  -9  -5   -1.15    0.58
   9   9   5    0.35    0.55
  -9   9  -5    1.53    0.41
  -9 -10   5    0.54    0.57
   9 -10  -5   -0.06    0.37
  -9  10   5    0.49    0.41
   9  10  -5    0.77    0.56
   8 -10  -5    1.10    0.35
  -8 -10   5    0.49    0.48
   8 -10  -5    1.07    0.57
  -8  10   5    1.05    0.37
   8  10  -5    0.66    0.50
   7 -10  -5    2.63    0.48
   7 -10  -5    2.21    0.36
  -7 -10   5    3.09    0.49
  -7  10   5    2.06    0.36
   7  10  -5    1.78    0.43
   6 -10  -5    0.02    0.38
  -6 -10   5    0.34    0.28
  -6 -10   5   -0.16    0.34
   6 -10  -5   -0.28    0.31
   6  10  -5    0.14    0.32
  -6  10   5   -0.06    0.24
  -5 -10   5    1.04    0.25
   5 -10  -5    2.19    0.36
   5 -10  -5    1.73    0.30
  -5 -10   5    1.86    0.40
   5  10  -5    1.73    0.34
  -5  10   5    1.42    0.27
   5  10  -5    1.13    0.60
  -5  10   5    1.80    0.44
  -4 -10   5    0.04    0.21
   4 -10  -5    0.04    0.22
  -4 -10   5    0.49    0.28
   4 -10  -5    0.58    0.27
   4  10  -5    0.29    0.31
  -4  10   5   -0.10    0.21
   4  10  -5   -0.16    0.22
  -4  10   5    0.01    0.30
  -3 -10   5    0.72    0.26
  -3 -10   5    1.00    0.20
   3 -10  -5    0.79    0.28
   3 -10  -5    0.86    0.24
   3  10  -5    0.75    0.28
  -3  10   5    0.32    0.28
   3  10  -5    0.87    0.25
   2 -10  -5    0.02    0.21
  -2 -10   5    0.22    0.21
   2 -10  -5   -0.11    0.21
  -2  10   5    0.18    0.18
   2  10  -5    0.01    0.18
   2  10  -5   -0.11    0.24
  -2  10   5    0.32    0.25
   1 -10  -5   30.21    1.15
  -1 -10   5   33.31    1.06
   1 -10  -5   32.61    1.10
  -1 -10   5   32.58    0.99
   1  10  -5   33.71    1.14
   1  10  -5   33.64    1.06
  -1  10   5   32.41    1.17
  -1  10   5   32.10    1.07
   0 -10  -5   16.75    0.67
   0 -10   5   16.32    0.60
   0 -10  -5   17.89    0.77
   0 -10   5   15.94    0.56
   0 -10   5   15.83    0.57
   0  10  -5   16.31    0.77
   0  10   5   16.43    0.75
   0  10   5   15.79    0.66
   0  10  -5   16.43    0.62
  -1 -10  -5    4.79    0.47
  -1 -10  -5    4.57    0.39
   1 -10   5    5.03    0.36
   1  10   5    5.28    0.45
   1  10   5    4.58    0.48
  -1  10  -5    4.58    0.32
  -1  10  -5    4.55    0.41
  -2 -10  -5    0.05    0.19
   2 -10   5    0.22    0.23
   2  10   5    0.08    0.25
   2  10   5    0.40    0.21
  -2  10  -5    0.87    0.22
  -2  10  -5    0.40    0.15
  -3 -10  -5    2.24    0.37
   3 -10   5    2.22    0.34
  -3  10  -5    2.14    0.29
   3  10   5    1.70    0.29
   3  10   5    2.40    0.39
   4 -10   5    0.61    0.33
  -4 -10  -5    0.61    0.30
   4  10   5    0.18    0.33
   4  10   5    0.34    0.25
  -4  10  -5    0.54    0.24
  -4  10  -5    0.55    0.18
  -5 -10  -5    1.00    0.36
   5  10   5    0.63    0.30
  -5  10  -5    0.95    0.30
  -6 -10  -5    0.25    0.38
  -6 -10  -5   -0.16    0.33
   6  10   5   -0.10    0.33
  -6  10  -5   -0.33    0.37
  -6  10  -5   -0.15    0.21
  -7 -10  -5    0.43    0.48
  -7 -10  -5    0.42    0.43
   7  10   5    0.74    0.40
  -7  10  -5    0.93    0.28
  -7  10  -5    1.67    0.51
  -8 -10  -5    0.47    0.51
  -8 -10  -5    0.55    0.55
   8  10   5   -0.26    0.51
  -8  10  -5    0.05    0.33
   8 -11  -5    3.25    0.46
  -8 -11   5    3.16    0.62
  -8  11   5    2.98    0.44
   8  11  -5    2.40    0.63
   7 -11  -5    1.69    0.38
  -7 -11   5    1.83    0.49
   7 -11  -5    2.40    0.55
   7  11  -5    0.87    0.50
  -7  11   5    1.41    0.38
   6 -11  -5    3.04    0.40
  -6 -11   5    2.93    0.50
   6  11  -5    1.86    0.43
  -6  11   5    2.63    0.39
   5 -11  -5    0.69    0.37
  -5 -11   5   -0.63    0.33
  -5 -11   5   -0.28    0.25
   5 -11  -5    0.32    0.34
  -5  11   5    0.35    0.26
   5  11  -5    0.01    0.30
   4 -11  -5    0.69    0.31
   4 -11  -5    0.26    0.45
  -4 -11   5    0.67    0.32
  -4  11   5    0.69    0.27
   4  11  -5    0.78    0.29
   3 -11  -5    1.16    0.30
  -3 -11   5    1.01    0.22
  -3 -11   5    0.69    0.30
   3 -11  -5    0.42    0.30
   3  11  -5    0.61    0.24
  -3  11   5    0.73    0.33
   3  11  -5    0.80    0.35
  -3  11   5    0.76    0.24
   2 -11  -5   -0.12    0.24
   2 -11  -5    0.36    0.27
  -2 -11   5   -0.03    0.23
  -2 -11   5    0.30    0.17
   2  11  -5    0.15    0.21
   2  11  -5    0.51    0.30
  -2  11   5    0.09    0.29
  -2  11   5   -0.07    0.19
  -1 -11   5    0.48    0.17
   1 -11  -5    0.10    0.32
   1 -11  -5    0.35    0.23
  -1 -11   5    0.19    0.21
   1  11  -5    0.57    0.27
  -1  11   5    0.47    0.20
  -1  11   5    0.55    0.30
   1  11  -5    0.25    0.18
   0 -11  -5   15.90    0.69
   0 -11  -5   13.32    0.89
   0 -11   5   14.94    0.56
   0 -11   5   15.83    0.60
   0 -11   5   15.82    0.56
   0  11  -5   15.49    0.62
   0  11   5   15.31    0.66
   0  11   5   15.71    0.78
   0  11  -5   15.75    0.71
  -1 -11  -5    2.51    0.38
  -1 -11  -5    2.69    0.33
   1 -11   5    2.77    0.30
  -1  11  -5    2.55    0.30
   1  11   5    2.78    0.39
  -1  11  -5    2.99    0.41
   1  11   5    2.85    0.37
  -2 -11  -5    2.00    0.36
   2 -11   5    1.50    0.32
  -2 -11  -5    2.10    0.31
  -2  11  -5    2.76    0.40
   2  11   5    1.63    0.28
   2  11   5    0.94    0.38
  -2  11  -5    1.51    0.22
  -3 -11  -5   -0.20    0.29
   3 -11   5   -0.41    0.30
   3  11   5   -0.34    0.23
  -3  11  -5    0.31    0.25
  -4 -11  -5   -0.33    0.33
   4 -11   5    0.21    0.37
  -4  11  -5    0.08    0.28
  -4  11  -5   -0.01    0.20
   4  11   5   -0.43    0.26
  -5 -11  -5    0.14    0.39
   5 -11   5    0.68    0.46
  -5  11  -5    0.32    0.21
   5  11   5    0.43    0.34
  -5  11  -5    0.22    0.36
  -6 -11  -5   -0.23    0.39
  -6 -11  -5    0.24    0.46
  -6  11  -5    0.25    0.24
   6  11   5    0.24    0.36
  -6  11  -5   -0.26    0.44
  -7 -11  -5    0.34    0.51
  -7 -11  -5    1.52    0.50
  -7  11  -5    1.21    0.31
   7  11   5   -0.06    0.45
   7 -12  -5    0.02    0.38
  -7 -12   5    0.25    0.51
  -7  12   5    0.06    0.33
   7  12  -5   -0.74    0.46
  -6 -12   5    0.82    0.46
   6 -12  -5    0.99    0.52
   6 -12  -5   -0.55    0.33
  -6  12   5    0.29    0.31
   6  12  -5    0.06    0.39
   5 -12  -5    0.38    0.43
   5 -12  -5   -0.24    0.31
  -5 -12   5   -0.20    0.38
  -5  12   5    0.01    0.28
   5  12  -5   -0.26    0.35
   4 -12  -5    0.91    0.38
  -4 -12   5   -0.49    0.25
   4 -12  -5    0.07    0.30
   4  12  -5   -0.04    0.31
   3 -12  -5    0.88    0.30
  -3 -12   5    1.27    0.35
   3 -12  -5    1.13    0.34
  -3 -12   5    0.72    0.25
  -3  12   5    0.83    0.26
   3  12  -5    0.95    0.30
  -2 -12   5    0.40    0.21
   2 -12  -5    0.17    0.28
  -2 -12   5   -0.18    0.26
   2 -12  -5    0.61    0.33
   2  12  -5   -0.32    0.22
  -2  12   5    0.18    0.21
   2  12  -5    0.19    0.34
   1 -12  -5    1.52    0.33
   1 -12  -5    1.77    0.33
  -1 -12   5    1.40    0.28
  -1 -12   5    1.35    0.24
   1  12  -5    1.16    0.34
   1  12  -5    1.16    0.26
  -1  12   5    1.28    0.25
   0 -12   5    1.56    0.25
   0 -12  -5    1.38    0.34
   0 -12   5    2.03    0.23
   0 -12  -5    1.81    0.31
   0 -12   5    1.46    0.23
   0  12   5    1.51    0.27
   0  12  -5    1.79    0.42
   0  12  -5    1.70    0.33
   1 -12   5    0.23    0.26
  -1 -12  -5    0.34    0.30
  -1  12  -5    0.64    0.30
   1  12   5    0.19    0.22
  -1  12  -5    0.41    0.19
  -2 -12  -5    1.23    0.38
   2  12   5    1.67    0.31
  -2  12  -5    0.97    0.32
  -2  12  -5    1.52    0.24
   3 -12   5   -0.18    0.54
  -3 -12  -5    0.10    0.33
  -3  12  -5   -0.52    0.29
   3  12   5   -0.53    0.27
  -3  12  -5    0.00    0.19
   4 -12   5    0.24    0.43
  -4 -12  -5    1.17    0.44
   4  12   5    0.05    0.33
  -4  12  -5    0.65    0.38
  -5 -12  -5    0.96    0.48
   5 -12   5    1.11    0.54
  -5  12  -5    1.36    0.45
   5  12   5    0.12    0.40
  -5  12  -5    0.71    0.27
  -6 -12  -5    0.01    0.49
  -6 -12  -5   -0.31    0.43
  -6  12  -5    0.16    0.27
   6  12   5    1.19    0.46
  -7 -12  -5    0.67    0.53
  -7  12  -5    1.19    0.36
   7  12   5   -0.86    0.53
   6 -13  -5    7.27    0.72
  -6 -13   5    5.27    0.65
  -6  13   5    4.56    0.67
   6  13  -5    4.97    0.65
  -5 -13   5    0.47    0.45
   5 -13  -5    1.51    0.42
   5  13  -5   -0.12    0.42
  -4 -13   5    0.58    0.42
   4 -13  -5    1.21    0.51
  -4 -13   5    0.13    0.32
   4 -13  -5    0.12    0.34
  -4  13   5    0.64    0.29
   4  13  -5    0.56    0.37
  -3 -13   5    0.50    0.27
   3 -13  -5    0.65    0.34
  -3 -13   5    0.37    0.36
   3 -13  -5    0.04    0.44
   3  13  -5   -0.13    0.29
  -3  13   5   -0.06    0.23
  -2 -13   5    1.17    0.31
  -2 -13   5    1.51    0.36
   2 -13  -5    0.41    0.33
   2  13  -5    0.50    0.30
  -2  13   5    0.54    0.23
  -1 -13   5    0.03    0.29
   1 -13  -5    0.41    0.32
   1  13  -5    0.05    0.24
  -1  13   5    0.05    0.23
   0 -13   5    2.46    0.36
   0 -13   5    3.00    0.35
   0 -13   5    3.23    0.41
   0 -13  -5    2.02    0.41
   0  13   5    2.02    0.33
   0  13  -5    2.31    0.31
  -1 -13  -5    0.19    0.36
   1 -13   5    0.66    0.29
  -1  13  -5    0.19    0.37
   1  13   5    0.24    0.25
  -1  13  -5    0.40    0.22
  -2 -13  -5    0.42    0.40
   2 -13   5    0.34    0.39
  -2  13  -5   -0.07    0.38
  -2  13  -5   -0.03    0.21
   2  13   5    0.08    0.28
   3 -13   5    0.01    0.41
  -3 -13  -5    0.02    0.42
   3  13   5    0.12    0.33
  -3  13  -5    0.28    0.22
  -4 -13  -5    0.62    0.49
  -4  13  -5   -0.13    0.24
   4  13   5   -0.48    0.38
  -5 -13  -5    1.14    0.56
  -5  13  -5   -0.10    0.28
   5  13   5   -0.64    0.44
  -6 -13  -5    0.15    0.51
   6  13   5    0.99    0.65
  -6  13  -5    0.08    0.35
  -5 -14   5    2.28    0.56
   5 -14  -5    1.19    0.47
   5  14  -5    0.78    0.53
  -5  14   5    0.88    0.37
   4 -14  -5   -0.72    0.41
  -4 -14   5   -0.25    0.47
   4  14  -5   -0.69    0.42
  -4  14   5    0.07    0.32
  -3 -14   5    0.70    0.69
   3 -14  -5    0.14    0.39
   3  14  -5    1.02    0.39
  -2 -14   5    1.19    0.40
   2 -14  -5   -0.09    0.38
   2  14  -5    0.69    0.34
  -2  14   5   -0.45    0.24
   1 -14  -5    0.33    0.40
  -1 -14   5    0.45    0.34
   1  14  -5   -0.55    0.27
  -1  14   5   -0.17    0.27
   0 -14   5    0.42    0.28
   0 -14  -5    0.42    0.41
   0  14  -5   -0.04    0.27
   0  14   5    0.11    0.28
  -1 -14  -5    1.76    0.47
  -1  14  -5    1.40    0.31
   1  14   5    1.62    0.37
  -2 -14  -5    2.08    0.52
   2  14   5    2.06    0.43
  -2  14  -5    2.17    0.32
  -3 -14  -5    0.03    0.50
   3  14   5   -0.70    0.37
  -3  14  -5    0.48    0.27
  -4 -14  -5    1.72    0.59
  -4  14  -5    0.77    0.30
   4  14   5    0.51    0.46
   3 -15  -5    0.03    0.48
  -3 -15   5    0.82    0.51
  -3  15   5    0.25    0.32
   3  15  -5   -0.34    0.44
  -2 -15   5    1.54    0.52
   2 -15  -5   -0.09    0.47
  -2  15   5    0.00    0.33
   2  15  -5    0.52    0.40
   1 -15  -5    0.19    0.47
  -1  15   5    0.04    0.36
   1  15  -5    0.35    0.36
   0 -15  -5    0.77    0.48
   0  15  -5    0.01    0.34
   0  15   5   -0.61    0.32
  -1 -15  -5   -0.22    0.51
   1  15   5   -0.40    0.36
  -1  15  -5   -0.55    0.28
  -2 -15  -5    0.43    0.54
   2  15   5   -0.33    0.55
  -2  15  -5    0.24    0.32
  12   0  -6    0.66    0.55
 -12   0   6    1.66    0.89
  11   0  -6    8.60    0.80
 -11   0   6    9.61    0.89
 -10   0   6   18.69    1.01
  10   0  -6   19.11    0.97
  -9   0   6    0.19    0.31
   9   0  -6    0.51    0.40
  -9   0   6    0.16    0.45
   9   0  -6    0.41    0.32
   8   0  -6    0.16    0.25
  -8   0   6    1.42    0.33
   8   0  -6    0.98    0.34
   8   0  -6    0.34    0.35
  -8   0   6    0.86    0.37
   7   0  -6    1.63    0.44
  -7   0   6    0.74    0.27
   7   0  -6    0.77    0.30
   7   0  -6    1.36    0.27
  -7   0   6    1.36    0.31
   6   0  -6    1.09    0.23
  -6   0   6    1.67    0.28
   6   0  -6    1.89    0.28
  -6   0   6    1.51    0.25
  -5   0   6   11.40    0.53
  -5   0   6   10.64    0.61
   5   0  -6   11.26    0.52
  -4   0   6    2.51    0.27
  -4   0   6    2.66    0.27
   4   0  -6    2.77    0.28
   4   0  -6    2.58    0.26
   3   0  -6   65.01    1.80
  -3   0   6   63.05    1.77
  -3   0   6   59.93    1.78
   3   0  -6   60.96    1.78
  -2   0   6    1.55    0.17
  -2   0   6    1.64    0.17
   2   0  -6    1.68    0.18
   2   0  -6    1.57    0.18
  -1   0   6   17.43    0.54
   1   0  -6   17.37    0.55
  -1   0   6   17.42    0.51
   1   0  -6   17.37    0.53
   0   0   6   14.48    0.41
   0   0  -6   14.14    0.42
   0   0  -6   14.47    0.47
   0   0   6   14.58    0.40
  -1   0  -6   26.19    0.79
  -1   0  -6   29.25    0.76
  -2   0  -6   18.48    0.54
  -2   0  -6   17.82    0.54
  -3   0  -6   41.54    1.29
  -3   0  -6   41.39    1.18
  -3   0  -6   41.21    1.18
  -4   0  -6    8.25    0.36
  -4   0  -6    8.37    0.37
   4   0   6    8.26    0.26
  -4   0  -6    8.09    0.47
  -5   0  -6   11.41    0.50
   5   0   6   11.71    0.39
  -5   0  -6   11.40    0.50
   5   0   6   11.41    0.38
  -5   0  -6   11.95    0.62
   6   0   6    1.36    0.19
  -6   0  -6    2.31    0.33
   6   0   6    1.90    0.17
  -6   0  -6    1.68    0.34
  -6   0  -6    1.59    0.26
   7   0   6   -0.05    0.12
  -7   0  -6   -0.15    0.22
  -7   0  -6   -0.07    0.24
   7   0   6    0.05    0.13
  -8   0  -6    0.54    0.35
   8   0   6    0.66    0.17
   8   0   6    0.25    0.15
  -8   0  -6    0.10    0.27
  -9   0  -6   -0.76    0.42
  -9   0  -6    0.35    0.34
   9   0   6   -0.08    0.18
   9   0   6   -0.11    0.17
 -10   0  -6    0.47    0.44
 -11   0  -6    4.47    0.69
  12  -1  -6    0.54    0.51
  12   1  -6    0.64    0.55
 -11  -1   6    5.90    0.82
  11  -1  -6    4.50    0.59
  11   1  -6    5.55    0.78
 -11   1   6    5.05    0.65
  10  -1  -6    5.97    0.65
 -10  -1   6    4.84    0.72
 -10   1   6    5.18    0.68
  10   1  -6    5.97    0.68
   9  -1  -6    2.13    0.48
   9  -1  -6    2.46    0.48
   9  -1  -6    2.41    0.39
  -9  -1   6    1.99    0.41
   9   1  -6    2.77    0.47
  -9   1   6    0.74    0.56
   9   1  -6    2.24    0.38
  -9   1   6    2.11    0.41
   9   1  -6    1.66    0.47
   8  -1  -6   -0.02    0.33
   8  -1  -6    0.34    0.31
   8  -1  -6    0.23    0.26
  -8  -1   6    0.51    0.32
  -8  -1   6    0.48    0.44
  -8   1   6   -0.31    0.31
   8   1  -6    0.48    0.32
  -8   1   6    0.50    0.34
   8   1  -6    1.04    0.34
   8   1  -6    0.43    0.28
  -7  -1   6    2.62    0.35
  -7  -1   6    2.38    0.36
   7  -1  -6    2.07    0.31
   7  -1  -6    2.66    0.37
  -7   1   6    1.89    0.33
   7   1  -6    2.67    0.38
  -7   1   6    2.50    0.36
   7   1  -6    2.40    0.33
   7   1  -6    2.30    0.34
  -6  -1   6    0.41    0.21
   6  -1  -6    0.45    0.20
   6  -1  -6    0.25    0.20
  -6  -1   6    0.51    0.22
   6   1  -6    0.30    0.20
   6   1  -6    0.18    0.19
  -6   1   6    0.59    0.21
  -6   1   6    0.14    0.22
   6   1  -6    0.22    0.36
  -5  -1   6    5.99    0.40
  -5  -1   6    5.65    0.46
   5  -1  -6    6.88    0.40
  -5   1   6    4.81    0.55
  -5   1   6    6.19    0.41
   5   1  -6    6.33    0.39
  -4  -1   6    0.12    0.14
   4  -1  -6    0.05    0.14
  -4  -1   6    0.19    0.13
   4  -1  -6    0.19    0.14
  -4   1   6    0.40    0.15
   4   1  -6    0.17    0.14
  -4   1   6    0.09    0.14
   4   1  -6    0.30    0.14
   3  -1  -6   -0.06    0.10
   3  -1  -6   -0.03    0.11
  -3  -1   6   -0.08    0.10
  -3  -1   6   -0.01    0.11
  -3   1   6    0.11    0.11
  -3   1   6    0.02    0.11
   3   1  -6   -0.13    0.11
   3   1  -6   -0.11    0.10
   2  -1  -6    6.96    0.31
  -2  -1   6    6.24    0.28
   2  -1  -6    6.94    0.31
  -2  -1   6    6.37    0.28
  -2   1   6    6.67    0.29
   2   1  -6    6.44    0.30
   2   1  -6    7.17    0.31
  -2   1   6    6.62    0.31
   1  -1  -6   -0.10    0.08
   1  -1  -6   -0.03    0.07
  -1  -1   6   -0.03    0.05
   1   1  -6   -0.08    0.07
  -1   1   6    0.04    0.07
   1   1  -6    0.02    0.07
  -1   1   6    0.11    0.08
   0  -1  -6    0.32    0.07
   0  -1  -6    0.26    0.08
   0   1   6    0.34    0.06
   0   1  -6    0.29    0.04
   0   1  -6    0.31    0.05
   0   1   6    0.33    0.07
  -1  -1  -6    0.16    0.07
  -1  -1  -6    0.36    0.06
   1   1   6    0.22    0.06
   1   1   6    0.24    0.06
  -2  -1  -6    0.85    0.12
  -2  -1  -6    0.59    0.09
   2   1   6    0.67    0.09
  -2   1  -6    0.52    0.06
  -2   1  -6    0.72    0.08
   2   1   6    0.59    0.08
  -3  -1  -6   13.04    0.46
  -3  -1  -6   13.25    0.45
  -3   1  -6   13.42    0.56
   3   1   6   12.91    0.43
   3   1   6   12.68    0.40
  -3   1  -6   12.74    0.42
  -3   1  -6   12.14    0.42
  -4  -1  -6  106.23    2.90
  -4  -1  -6  105.98    2.91
  -4  -1  -6  106.64    3.02
  -4   1  -6  105.57    2.88
  -4   1  -6  104.27    2.88
  -4   1  -6  105.05    3.02
   4   1   6  103.89    2.84
   4   1   6  104.41    2.86
  -5  -1  -6    3.31    0.40
  -5  -1  -6    3.18    0.30
  -5  -1  -6    2.87    0.30
   5   1   6    3.10    0.25
  -5   1  -6    2.59    0.28
  -5   1  -6    3.09    0.27
   5   1   6    3.02    0.21
  -5   1  -6    2.70    0.41
  -6  -1  -6    6.72    0.45
  -6  -1  -6    6.11    0.44
  -6  -1  -6    6.54    0.55
   6   1   6    6.92    0.32
   6   1   6    6.80    0.36
  -6   1  -6    6.27    0.59
  -6   1  -6    6.16    0.42
  -6   1  -6    6.20    0.54
  -7  -1  -6    0.29    0.24
  -7  -1  -6   -0.07    0.24
   7   1   6    0.27    0.17
  -7   1  -6    0.29    0.23
  -7   1  -6   -0.03    0.37
   7   1   6    0.07    0.15
  -8  -1  -6    0.28    0.32
  -8  -1  -6    0.56    0.30
  -8  -1  -6   -0.17    0.35
  -8   1  -6    0.14    0.33
   8   1   6    0.09    0.25
   8   1   6    0.18    0.19
  -8   1  -6    0.35    0.28
  -9  -1  -6    2.59    0.46
  -9   1  -6    2.67    0.50
  -9   1  -6    2.16    0.43
   9   1   6    2.40    0.28
   9   1   6    1.57    0.27
 -10  -1  -6    1.03    0.45
  10   1   6    0.25    0.27
 -10   1  -6    0.86    0.44
 -11  -1  -6    0.07    0.57
 -11   1  -6    0.78    0.58
  12  -2  -6    2.89    0.55
  12   2  -6    1.97    0.64
  11  -2  -6    0.93    0.42
 -11  -2   6   -0.11    0.47
 -11   2   6    0.69    0.48
  11   2  -6    0.60    0.45
 -10  -2   6    0.99    0.39
  10  -2  -6    1.38    0.38
 -10   2   6    0.97    0.39
  10   2  -6    1.75    0.41
  -9  -2   6    8.07    0.71
   9  -2  -6    9.27    0.80
   9  -2  -6    8.57    0.84
   9  -2  -6   10.16    0.65
  -9   2   6    8.56    0.69
   9   2  -6    9.74    0.78
   9   2  -6    8.61    0.68
   9   2  -6    7.85    0.76
   8  -2  -6    4.66    0.55
   8  -2  -6    4.66    0.48
   8  -2  -6    4.53    0.55
  -8  -2   6    4.96    0.56
   8   2  -6    4.93    0.72
   8   2  -6    5.70    0.57
  -8   2   6    5.35    0.57
   8   2  -6    4.02    0.60
  -7  -2   6    0.70    0.26
   7  -2  -6    0.61    0.24
   7  -2  -6    0.79    0.27
  -7  -2   6    0.47    0.27
  -7   2   6   -0.07    0.25
   7   2  -6    1.11    0.28
   7   2  -6    0.91    0.27
  -7   2   6    0.40    0.26
   7   2  -6    0.42    0.29
   6  -2  -6    2.79    0.41
   6  -2  -6    3.19    0.35
  -6  -2   6    3.37    0.38
  -6  -2   6    2.80    0.36
  -6   2   6    2.32    0.30
   6   2  -6    2.96    0.37
   6   2  -6    3.14    0.37
  -6   2   6    3.88    0.51
   6   2  -6    3.53    0.51
   5  -2  -6    4.42    0.35
   5  -2  -6    4.82    0.42
  -5  -2   6    4.23    0.37
  -5   2   6    4.86    0.38
  -5   2   6    4.62    0.37
   5   2  -6    4.69    0.34
   5   2  -6    4.44    0.38
   5   2  -6    4.94    0.37
   4  -2  -6    2.60    0.28
  -4  -2   6    2.78    0.26
  -4  -2   6    1.79    0.26
   4  -2  -6    2.13    0.24
   4   2  -6    2.92    0.29
  -4   2   6    2.35    0.27
  -4   2   6    2.45    0.27
   4   2  -6    2.36    0.26
  -3  -2   6   45.56    1.35
  -3  -2   6   46.32    1.34
   3  -2  -6   46.83    1.37
   3  -2  -6   44.96    1.36
   3   2  -6   46.47    1.37
   3   2  -6   44.61    1.37
  -3   2   6   48.41    1.35
  -3   2   6   45.75    1.38
   2  -2  -6    9.25    0.37
  -2  -2   6    9.13    0.34
  -2  -2   6    8.32    0.32
   2  -2  -6    8.82    0.36
  -2   2   6    8.19    0.37
   2   2  -6    8.59    0.36
   2   2  -6    8.79    0.35
  -2   2   6    8.66    0.34
  -1  -2   6   35.61    0.98
  -1  -2   6   36.59    0.98
   1  -2  -6   36.43    1.06
   1  -2  -6   37.52    1.05
   1   2  -6   35.49    1.03
   1   2  -6   37.78    1.03
  -1   2   6   36.80    1.07
  -1   2   6   35.78    1.03
   0  -2  -6    1.68    0.14
   0  -2  -6    1.60    0.15
   0   2   6    1.51    0.13
   0   2   6    1.62    0.15
  -1  -2  -6    9.01    0.32
  -1  -2  -6    9.51    0.35
   1   2   6    9.39    0.32
   1   2   6    9.25    0.33
  -2  -2  -6    0.92    0.13
  -2  -2  -6    0.86    0.12
   2   2   6    1.03    0.14
  -2   2  -6    0.94    0.16
   2   2   6    0.89    0.13
  -3  -2  -6   -0.13    0.09
  -3  -2  -6    0.12    0.10
  -3   2  -6    0.18    0.07
   3   2   6    0.11    0.09
   3   2   6   -0.10    0.08
  -3   2  -6   -0.01    0.15
  -3   2  -6   -0.04    0.07
  -4  -2  -6   49.62    1.45
  -4  -2  -6   50.30    1.49
  -4   2  -6   49.97    1.57
   4   2   6   49.70    1.45
   4   2   6   48.79    1.42
  -4   2  -6   48.78    1.42
  -4   2  -6   51.22    1.42
  -5  -2  -6    2.45    0.35
  -5  -2  -6    2.10    0.26
  -5  -2  -6    2.38    0.32
  -5   2  -6    2.11    0.26
   5   2   6    2.22    0.26
  -5   2  -6    2.91    0.39
  -5   2  -6    2.32    0.26
   5   2   6    2.73    0.24
  -6  -2  -6    5.59    0.44
  -6  -2  -6    6.13    0.55
  -6  -2  -6    6.61    0.48
  -6   2  -6    6.13    0.42
   6   2   6    5.61    0.34
   6   2   6    5.64    0.38
  -6   2  -6    6.43    0.41
  -7  -2  -6    8.16    0.54
  -7  -2  -6    7.38    0.55
   7   2   6    7.90    0.42
   7   2   6    7.73    0.47
  -7   2  -6    8.82    0.55
  -7   2  -6    7.93    0.51
  -8  -2  -6    0.97    0.35
  -8  -2  -6    1.12    0.41
  -8  -2  -6    1.57    0.54
   8   2   6    1.48    0.29
  -8   2  -6    1.25    0.36
  -8   2  -6    1.41    0.32
  -9  -2  -6    0.01    0.37
   9   2   6    0.60    0.28
  -9   2  -6    0.59    0.35
  -9   2  -6    0.18    0.43
   9   2   6   -0.14    0.26
 -10  -2  -6   -0.55    0.44
 -10   2  -6    0.43    0.42
  10   2   6   -0.08    0.33
  11  -3  -6    0.35    0.41
 -11  -3   6    1.02    0.49
  11   3  -6    0.81    0.52
 -11   3   6    1.44    0.48
 -10  -3   6    0.49    0.41
  10  -3  -6    0.06    0.32
  10   3  -6    0.40    0.40
 -10   3   6    0.31    0.37
  -9  -3   6    0.31    0.35
   9  -3  -6    0.67    0.40
   9  -3  -6    0.52    0.30
   9   3  -6    0.54    0.33
   9   3  -6    0.10    0.39
  -9   3   6    0.39    0.33
  -8  -3   6    4.62    0.57
  -8  -3   6    4.83    0.58
   8  -3  -6    5.70    0.60
   8  -3  -6    6.28    0.50
   8   3  -6    6.86    0.64
  -8   3   6    5.66    0.62
  -8   3   6    5.96    0.56
   8   3  -6    6.36    0.59
   8   3  -6    6.18    0.57
  -7  -3   6    0.88    0.28
   7  -3  -6    0.83    0.28
  -7  -3   6    0.62    0.29
   7  -3  -6    0.55    0.22
  -7   3   6    0.61    0.26
   7   3  -6    0.57    0.27
   7   3  -6    0.98    0.27
   7   3  -6    0.65    0.30
  -7   3   6    0.73    0.29
  -6  -3   6    0.46    0.28
   6  -3  -6   -0.30    0.20
  -6  -3   6   -0.12    0.20
   6  -3  -6    0.06    0.18
   6   3  -6    0.05    0.20
   6   3  -6   -0.04    0.23
   6   3  -6   -0.18    0.17
  -6   3   6    0.08    0.21
  -6   3   6   -0.30    0.20
  -5  -3   6    0.15    0.16
   5  -3  -6    0.10    0.18
  -5  -3   6    0.22    0.19
   5  -3  -6   -0.03    0.15
   5   3  -6    0.20    0.17
  -5   3   6    0.17    0.17
   5   3  -6    0.14    0.15
   5   3  -6    0.04    0.19
  -5   3   6    0.00    0.18
   4  -3  -6    1.18    0.20
  -4  -3   6    1.22    0.18
  -4  -3   6    1.05    0.19
   4  -3  -6    1.03    0.18
   4   3  -6    1.25    0.20
  -4   3   6    1.19    0.19
  -4   3   6    1.19    0.19
   4   3  -6    1.45    0.19
   4   3  -6    1.11    0.19
  -3  -3   6    0.35    0.11
  -3  -3   6    0.10    0.13
   3  -3  -6    0.18    0.14
   3  -3  -6    0.38    0.13
  -3   3   6    0.27    0.14
  -3   3   6    0.13    0.12
   3   3  -6    0.21    0.12
   3   3  -6    0.27    0.13
   2  -3  -6    9.02    0.37
  -2  -3   6    8.92    0.34
  -2  -3   6    8.50    0.30
   2  -3  -6    8.20    0.36
  -2   3   6    8.18    0.34
  -2   3   6    8.49    0.38
   2   3  -6    8.63    0.37
   2   3  -6    8.61    0.35
  -1  -3   6    0.22    0.05
   1  -3  -6    0.34    0.11
  -1  -3   6    0.31    0.04
   1  -3  -6    0.26    0.09
  -1   3   6    0.39    0.09
   1   3  -6    0.35    0.08
   1   3  -6    0.19    0.08
  -1   3   6    0.33    0.11
   0  -3  -6    0.78    0.12
   0  -3  -6    0.72    0.12
   0   3  -6    0.60    0.09
   0   3  -6    0.73    0.11
   0   3   6    0.83    0.13
   0   3   6    0.77    0.12
   0   3  -6    0.74    0.06
  -1  -3  -6    2.77    0.20
  -1  -3  -6    2.57    0.18
  -1   3  -6    2.74    0.21
   1   3   6    2.80    0.18
   1   3   6    2.44    0.19
  -2  -3  -6    1.89    0.19
  -2  -3  -6    2.06    0.18
   2   3   6    2.20    0.19
   2   3   6    2.00    0.18
  -2   3  -6    1.98    0.24
  -3  -3  -6    2.53    0.21
  -3  -3  -6    2.52    0.24
  -3   3  -6    2.61    0.14
   3   3   6    3.05    0.24
   3   3   6    2.67    0.22
  -3   3  -6    2.60    0.28
  -4  -3  -6    0.42    0.14
  -4  -3  -6    0.23    0.15
   4   3   6    0.14    0.14
  -4   3  -6    0.26    0.12
   4   3   6    0.21    0.12
  -4   3  -6    0.14    0.10
  -5  -3  -6    6.25    0.51
  -5  -3  -6    6.41    0.39
  -5  -3  -6    6.01    0.41
   5   3   6    6.15    0.39
  -5   3  -6    6.44    0.36
   5   3   6    6.67    0.36
  -5   3  -6    5.90    0.35
  -6  -3  -6   13.92    0.75
  -6  -3  -6   14.02    0.63
  -6  -3  -6   13.79    0.68
  -6   3  -6   13.70    0.61
   6   3   6   14.15    0.58
   6   3   6   14.76    0.62
  -6   3  -6   14.70    0.61
  -7  -3  -6    4.38    0.48
  -7  -3  -6    4.77    0.63
  -7  -3  -6    4.95    0.50
   7   3   6    5.09    0.40
  -7   3  -6    4.49    0.47
  -7   3  -6    5.05    0.43
   7   3   6    5.51    0.44
  -8  -3  -6    0.08    0.34
  -8  -3  -6    0.15    0.31
  -8  -3  -6   -0.33    0.33
  -8   3  -6    0.14    0.33
   8   3   6    0.19    0.25
  -8   3  -6    0.26    0.27
   8   3   6    0.07    0.26
  -9  -3  -6    0.00    0.46
  -9  -3  -6   -0.26    0.37
   9   3   6   -0.44    0.31
   9   3   6    0.07    0.30
  -9   3  -6   -0.32    0.44
  -9   3  -6    0.38    0.33
 -10  -3  -6    0.25    0.48
  10   3   6   -0.22    0.39
 -10   3  -6    1.54    0.44
 -11  -4   6    2.05    0.58
  11  -4  -6    2.16    0.45
 -11   4   6    1.80    0.49
  11   4  -6    1.18    0.55
 -10  -4   6   -0.83    0.40
  10  -4  -6   -0.23    0.33
 -10   4   6    0.08    0.37
  10   4  -6    0.30    0.40
   9  -4  -6   -0.12    0.27
   9  -4  -6    0.25    0.37
  -9  -4   6    0.22    0.38
  -9   4   6    0.45    0.32
   9   4  -6   -0.54    0.32
   8  -4  -6    6.16    0.62
  -8  -4   6    4.86    0.58
   8  -4  -6    5.73    0.49
  -8  -4   6    5.19    0.57
   8   4  -6    5.11    0.57
  -8   4   6    5.82    0.55
  -8   4   6    6.02    0.68
   8   4  -6    5.96    0.63
   7  -4  -6    1.33    0.32
  -7  -4   6    1.28    0.31
   7  -4  -6    1.12    0.27
  -7  -4   6    0.89    0.26
   7   4  -6    1.23    0.30
   7   4  -6    1.24    0.34
   7   4  -6    1.24    0.27
  -7   4   6    1.13    0.31
  -7   4   6    1.18    0.30
  -6  -4   6    1.01    0.27
   6  -4  -6    0.83    0.22
  -6  -4   6    0.55    0.22
   6  -4  -6    0.65    0.46
  -6   4   6    0.36    0.22
  -6   4   6    0.67    0.27
   6   4  -6    0.44    0.22
   6   4  -6    0.66    0.21
   6   4  -6    1.06    0.29
  -5  -4   6    1.04    0.19
   5  -4  -6    0.65    0.22
   5  -4  -6    0.75    0.20
  -5  -4   6    0.97    0.23
  -5   4   6    0.81    0.23
  -5   4   6    1.19    0.24
   5   4  -6    0.66    0.21
   5   4  -6    0.67    0.25
   5   4  -6    1.10    0.19
  -4  -4   6    4.85    0.31
  -4  -4   6    4.67    0.35
   4  -4  -6    4.57    0.31
   4   4  -6    4.74    0.26
   4   4  -6    4.92    0.38
  -4   4   6    4.37    0.33
  -4   4   6    4.34    0.43
   4   4  -6    4.57    0.34
   3  -4  -6    5.40    0.34
  -3  -4   6    5.16    0.32
  -3  -4   6    5.67    0.27
   3  -4  -6    5.32    0.32
   3   4  -6    5.66    0.32
  -3   4   6    5.02    0.33
   3   4  -6    5.27    0.22
  -3   4   6    5.09    0.31
   3   4  -6    5.13    0.34
   2  -4  -6   99.25    2.72
  -2  -4   6  100.39    2.68
   2  -4  -6   96.32    2.71
  -2  -4   6   97.59    2.63
   2   4  -6  100.93    2.72
  -2   4   6   96.69    2.73
   2   4  -6   94.99    2.69
  -2   4   6   98.84    2.69
  -1  -4   6    1.20    0.09
   1  -4  -6    0.95    0.14
   1  -4  -6    1.32    0.18
   1   4  -6    1.45    0.13
   1   4  -6    1.19    0.16
  -1   4   6    1.21    0.17
  -1   4   6    1.01    0.16
   0  -4  -6    6.61    0.29
   0  -4  -6    6.42    0.31
   0   4   6    6.11    0.31
   0   4   6    6.33    0.28
   0   4  -6    6.43    0.22
   0   4  -6    6.30    0.25
  -1  -4  -6    2.90    0.23
  -1  -4  -6    3.33    0.22
  -1   4  -6    2.96    0.12
   1   4   6    3.06    0.22
   1   4   6    3.42    0.21
  -1   4  -6    3.14    0.13
  -2  -4  -6    5.45    0.31
  -2  -4  -6    5.27    0.27
   2   4   6    5.42    0.29
  -2   4  -6    5.39    0.18
   2   4   6    5.89    0.30
  -3  -4  -6   27.35    0.93
  -3  -4  -6   30.44    0.89
  -3   4  -6   28.72    0.82
  -3   4  -6   27.90    0.80
   3   4   6   27.42    0.91
   3   4   6   28.29    0.90
  -4  -4  -6    3.43    0.28
  -4  -4  -6    3.45    0.32
   4   4   6    3.25    0.30
   4   4   6    3.05    0.27
  -4   4  -6    2.63    0.21
  -4   4  -6    2.98    0.23
  -5  -4  -6    2.04    0.31
  -5  -4  -6    1.64    0.26
  -5   4  -6    1.59    0.21
   5   4   6    1.61    0.24
  -5   4  -6    2.33    0.26
  -6  -4  -6    1.53    0.32
  -6  -4  -6    1.66    0.31
  -6  -4  -6    1.53    0.27
  -6   4  -6    1.73    0.26
  -6   4  -6    1.84    0.25
   6   4   6    1.60    0.24
   6   4   6    1.82    0.29
  -7  -4  -6    0.45    0.31
  -7  -4  -6    0.80    0.34
  -7  -4  -6   -0.38    0.25
  -7   4  -6    0.22    0.27
   7   4   6    0.63    0.26
  -7   4  -6    0.25    0.23
  -8  -4  -6    0.60    0.34
  -8  -4  -6    0.01    0.37
   8   4   6   -0.02    0.28
  -8   4  -6    0.11    0.36
  -8   4  -6    0.02    0.26
   8   4   6    0.04    0.27
  -9  -4  -6    1.14    0.50
  -9  -4  -6    0.16    0.39
   9   4   6    0.39    0.36
  -9   4  -6    0.32    0.33
  -9   4  -6    0.11    0.49
   9   4   6    0.71    0.36
 -10  -4  -6    1.83    0.58
 -10   4  -6    2.51    0.51
  10   4   6    2.22    0.58
  11  -5  -6    0.88    0.43
 -11  -5   6    1.06    0.58
 -11   5   6    1.83    0.51
  11   5  -6    1.06    0.56
  10  -5  -6    0.42    0.34
 -10  -5   6    0.75    0.47
 -10   5   6    0.74    0.42
  10   5  -6    0.20    0.43
   9  -5  -6    0.15    0.29
   9  -5  -6    0.04    0.42
  -9  -5   6   -0.37    0.34
  -9   5   6   -0.04    0.31
   9   5  -6    0.39    0.37
  -8  -5   6   -0.37    0.30
   8  -5  -6   -0.35    0.36
   8  -5  -6   -0.31    0.23
  -8  -5   6    0.02    0.30
   8   5  -6   -0.53    0.36
   8   5  -6    0.02    0.31
  -8   5   6   -0.19    0.27
  -8   5   6    0.29    0.39
  -7  -5   6    0.47    0.28
   7  -5  -6    0.02    0.20
  -7  -5   6    0.08    0.23
   7  -5  -6    0.34    0.29
  -7   5   6    0.08    0.24
   7   5  -6   -0.31    0.28
   7   5  -6   -0.31    0.27
  -7   5   6    0.31    0.33
   6  -5  -6    3.92    0.38
   6  -5  -6    3.73    0.45
  -6  -5   6    4.69    0.47
  -6  -5   6    4.14    0.41
  -6   5   6    3.92    0.46
   6   5  -6    4.21    0.47
  -6   5   6    3.87    0.43
   6   5  -6    4.10    0.44
  -5  -5   6    0.43    0.17
   5  -5  -6    0.36    0.17
  -5  -5   6   -0.17    0.18
   5  -5  -6    0.29    0.21
   5   5  -6    0.62    0.37
   5   5  -6    0.27    0.18
  -5   5   6    0.02    0.23
  -5   5   6    0.16    0.21
   4  -5  -6    0.17    0.15
  -4  -5   6   -0.03    0.16
  -4  -5   6   -0.01    0.13
   4  -5  -6    0.17    0.18
   4   5  -6   -0.02    0.16
  -4   5   6    0.15    0.18
  -4   5   6    0.14    0.17
   4   5  -6   -0.06    0.14
  -3  -5   6    0.31    0.10
   3  -5  -6    0.25    0.14
   3  -5  -6    0.54    0.21
  -3  -5   6    0.24    0.15
  -3   5   6    0.10    0.13
   3   5  -6    0.27    0.16
  -3   5   6    0.19    0.32
   3   5  -6    0.37    0.14
   2  -5  -6   18.67    0.66
   2  -5  -6   18.67    0.65
  -2  -5   6   18.81    0.63
  -2  -5   6   18.42    0.56
  -2   5   6   18.90    0.64
  -2   5   6   18.88    0.67
   2   5  -6   18.27    0.62
   2   5  -6   18.18    0.66
   1  -5  -6    6.81    0.33
  -1  -5   6    6.67    0.26
  -1  -5   6    6.67    0.23
   1  -5  -6    6.96    0.34
   1   5  -6    6.75    0.32
   1   5  -6    7.00    0.28
  -1   5   6    6.44    0.34
   0  -5  -6    0.39    0.12
   0  -5  -6    0.51    0.12
   0   5  -6    0.34    0.10
   0   5   6    0.51    0.11
   0   5  -6    0.36    0.07
   0   5   6    0.23    0.12
  -1  -5  -6   10.20    0.42
  -1  -5  -6   10.99    0.46
  -1   5  -6   10.55    0.36
   1   5   6   11.28    0.45
  -1   5  -6   10.60    0.34
   1   5   6   10.89    0.41
  -2  -5  -6    1.13    0.17
  -2  -5  -6    1.63    0.23
  -2   5  -6    1.11    0.13
   2   5   6    1.51    0.22
  -2   5  -6    1.23    0.12
   2   5   6    1.19    0.18
   3  -5   6    1.94    0.29
  -3  -5  -6    1.81    0.23
  -3  -5  -6    2.39    0.28
  -3   5  -6    2.11    0.19
   3   5   6    1.73    0.26
   3   5   6    2.22    0.26
  -3   5  -6    2.02    0.15
  -4  -5  -6    6.38    0.44
   4  -5   6    6.42    0.46
  -4  -5  -6    6.74    0.38
   4   5   6    7.58    0.42
  -4   5  -6    6.51    0.33
   4   5   6    7.20    0.40
  -4   5  -6    6.58    0.31
  -5  -5  -6    8.89    0.46
  -5  -5  -6    8.76    0.53
   5  -5   6    8.75    0.67
  -5   5  -6    8.60    0.42
   5   5   6    9.52    0.48
  -5   5  -6    8.17    0.42
   5   5   6    9.16    0.50
  -6  -5  -6    8.64    0.50
  -6  -5  -6    8.29    0.57
  -6  -5  -6    8.39    0.62
  -6   5  -6    6.96    0.53
   6   5   6    8.11    0.57
  -6   5  -6    8.03    0.46
   6   5   6    7.58    0.52
  -7  -5  -6   -0.03    0.27
  -7  -5  -6   -0.12    0.30
  -7  -5  -6    0.54    0.31
  -7   5  -6    0.05    0.23
  -7   5  -6    0.13    0.33
   7   5   6    0.09    0.25
   7   5   6   -0.01    0.27
  -8  -5  -6    0.40    0.35
  -8  -5  -6    0.31    0.40
   8   5   6    1.06    0.33
   8   5   6    0.39    0.32
  -8   5  -6    0.56    0.31
  -8   5  -6    1.04    0.38
  -9  -5  -6    0.26    0.41
  -9  -5  -6   -0.21    0.47
   9   5   6   -0.05    0.37
  -9   5  -6    0.77    0.36
   9   5   6    0.76    0.40
  -9   5  -6    0.77    0.53
 -10  -5  -6    1.13    0.57
 -10   5  -6    1.46    0.51
  11  -6  -6    1.83    0.46
 -11  -6   6    0.93    0.65
 -11   6   6    1.69    0.55
  11   6  -6    0.92    0.61
 -10  -6   6    1.70    0.53
  10  -6  -6    0.99    0.37
 -10   6   6    1.73    0.43
  10   6  -6    0.64    0.52
   9  -6  -6    1.31    0.48
   9  -6  -6    0.91    0.32
  -9  -6   6    0.66    0.40
   9   6  -6    0.60    0.39
  -9   6   6    0.82    0.34
  -8  -6   6    2.15    0.39
   8  -6  -6    1.32    0.51
   8  -6  -6    2.23    0.43
  -8  -6   6    2.28    0.42
  -8   6   6    1.94    0.34
   8   6  -6    1.90    0.39
   7  -6  -6   10.59    0.57
   7  -6  -6   10.37    0.68
  -7  -6   6    9.92    0.59
  -7  -6   6    9.90    1.08
   7   6  -6   10.31    0.73
   7   6  -6   10.17    0.66
  -7   6   6    9.12    0.71
  -7   6   6    9.77    0.63
   6  -6  -6    2.10    0.34
   6  -6  -6    1.86    0.27
  -6  -6   6    2.32    0.37
  -6  -6   6    1.98    0.27
   6   6  -6    1.43    0.34
  -6   6   6    2.01    0.36
  -6   6   6    1.63    0.30
   6   6  -6    1.72    0.31
   5  -6  -6    3.32    0.62
   5  -6  -6    2.90    0.33
  -5  -6   6    2.60    0.33
  -5  -6   6    2.80    0.31
   5   6  -6    3.15    0.38
   5   6  -6    3.11    0.36
  -5   6   6    2.75    0.40
  -5   6   6    3.24    0.38
   4  -6  -6    1.69    0.22
  -4  -6   6    1.69    0.26
   4  -6  -6    1.62    0.27
  -4  -6   6    1.95    0.24
  -4   6   6    1.49    0.28
   4   6  -6    1.73    0.26
   4   6  -6    1.35    0.22
  -4   6   6    1.21    0.21
  -3  -6   6    0.37    0.17
  -3  -6   6    0.68    0.13
   3  -6  -6    0.59    0.17
   3  -6  -6    0.23    0.18
   3   6  -6    0.62    0.17
  -3   6   6    0.57    0.16
  -3   6   6    0.49    0.18
   3   6  -6    0.27    0.31
   2  -6  -6    0.97    0.19
  -2  -6   6    1.32    0.18
  -2  -6   6    0.93    0.12
   2  -6  -6    0.96    0.17
  -2   6   6    1.02    0.18
   2   6  -6    0.91    0.19
  -2   6   6    0.87    0.17
   2   6  -6    1.10    0.16
  -1  -6   6   20.67    0.63
   1  -6  -6   20.33    0.72
  -1  -6   6   19.84    0.59
   1   6  -6   19.61    0.69
  -1   6   6   21.00    0.69
   1   6  -6   20.66    0.64
   0  -6  -6    2.83    0.27
   0   6   6    3.41    0.24
   0   6  -6    3.04    0.23
   0   6  -6    3.09    0.18
  -1  -6  -6    3.69    0.31
  -1  -6  -6    3.84    0.28
   1   6   6    4.11    0.27
  -1   6  -6    3.59    0.22
  -1   6  -6    4.10    0.20
  -2  -6  -6    6.61    0.40
   2  -6   6    5.88    0.36
  -2  -6  -6    6.27    0.35
   2   6   6    6.84    0.36
  -2   6  -6    6.34    0.27
   2   6   6    6.67    0.38
  -2   6  -6    6.54    0.26
   3  -6   6    0.60    0.20
  -3  -6  -6    0.97    0.20
  -3  -6  -6    0.96    0.19
  -3   6  -6    0.78    0.13
   3   6   6    0.85    0.19
   3   6   6    0.98    0.22
  -3   6  -6    1.06    0.13
  -4  -6  -6    6.22    0.46
   4  -6   6    5.45    0.46
  -4  -6  -6    6.38    0.38
   4   6   6    6.10    0.43
  -4   6  -6    5.67    0.30
  -4   6  -6    5.89    0.33
   4   6   6    6.65    0.41
  -5  -6  -6    1.06    0.28
   5  -6   6    1.15    0.30
  -5  -6  -6    1.00    0.24
   5   6   6    1.07    0.24
   5   6   6    1.05    0.25
  -5   6  -6    0.97    0.19
  -5   6  -6    1.02    0.20
   6  -6   6    0.22    0.33
  -6  -6  -6   -0.23    0.22
  -6  -6  -6   -0.08    0.28
  -6  -6  -6   -0.20    0.29
  -6   6  -6   -0.12    0.18
  -6   6  -6    0.12    0.22
   6   6   6    0.13    0.25
   6   6   6   -0.32    0.21
  -7  -6  -6    4.93    0.61
  -7  -6  -6    4.37    0.59
   7   6   6    4.99    0.54
   7   6   6    4.53    0.51
  -7   6  -6    5.17    0.57
  -7   6  -6    4.73    0.46
  -8  -6  -6    0.43    0.37
  -8  -6  -6   -0.32    0.40
  -8   6  -6   -0.21    0.28
   8   6   6    0.21    0.36
   8   6   6    0.64    0.35
  -8   6  -6   -0.32    0.42
  -9  -6  -6    4.48    0.64
  -9  -6  -6    2.79    0.57
  -9   6  -6    3.17    0.47
   9   6   6    2.57    0.51
  -9   6  -6    2.89    0.69
   9   6   6    2.88    0.52
 -10  -6  -6    1.86    0.71
 -10  -6  -6    1.65    0.59
 -10   6  -6    2.24    0.51
  10   6   6    0.97    0.54
  10  -7  -6   -0.69    0.36
 -10  -7   6    1.08    0.53
 -10   7   6    0.83    0.42
  10   7  -6    0.01    0.55
  -9  -7   6    0.18    0.43
   9  -7  -6    0.35    0.48
   9  -7  -6   -0.09    0.29
  -9   7   6    0.20    0.33
   9   7  -6   -0.31    0.40
   8  -7  -6    0.35    0.40
  -8  -7   6    0.17    0.34
   8  -7  -6    0.08    0.27
  -8   7   6    0.17    0.28
   8   7  -6    0.57    0.36
   7  -7  -6    2.40    0.33
  -7  -7   6    2.79    0.43
   7  -7  -6    4.06    0.58
  -7  -7   6    2.34    0.36
   7   7  -6    3.01    0.41
  -7   7   6    3.23    0.45
  -7   7   6    2.33    0.45
   7   7  -6    2.46    0.46
  -6  -7   6   11.65    0.57
   6  -7  -6   11.98    0.59
   6  -7  -6   12.12    0.68
  -6  -7   6   12.11    0.70
   6   7  -6   10.40    0.78
  -6   7   6   11.73    0.62
  -6   7   6   11.66    0.71
   6   7  -6   11.24    0.72
  -5  -7   6    5.63    0.49
   5  -7  -6    5.56    0.48
  -5  -7   6    4.90    0.46
   5  -7  -6    5.68    0.42
  -5   7   6    5.57    0.43
  -5   7   6    6.11    0.51
   5   7  -6    5.13    0.46
   5   7  -6    5.70    0.52
  -4  -7   6   10.27    0.55
   4  -7  -6    9.93    0.51
  -4  -7   6    9.93    0.44
  -4   7   6   10.13    0.56
  -4   7   6   10.05    0.51
   4   7  -6   10.09    0.54
   4   7  -6   10.88    0.60
   3  -7  -6    1.27    0.20
   3  -7  -6    0.99    0.23
  -3  -7   6    1.03    0.22
  -3   7   6    1.76    0.32
   3   7  -6    1.04    0.22
  -3   7   6    0.78    0.18
   3   7  -6    1.07    0.20
  -2  -7   6    6.81    0.37
   2  -7  -6    6.26    0.39
   2  -7  -6    6.50    0.40
  -2   7   6    6.54    0.39
  -2   7   6    7.29    0.42
   2   7  -6    6.58    0.40
   2   7  -6    7.12    0.37
   1  -7  -6    2.36    0.28
   1  -7  -6    2.27    0.28
  -1  -7   6    1.96    0.21
  -1  -7   6    2.17    0.16
   1   7  -6    1.96    0.26
  -1   7   6    2.10    0.25
  -1   7   6    2.16    0.28
   1   7  -6    2.72    0.22
   0  -7  -6    0.46    0.14
   0  -7  -6    0.41    0.17
   0   7  -6    0.66    0.14
   0   7  -6    0.63    0.12
   0   7   6    0.50    0.16
   0   7   6    0.45    0.14
   1  -7   6   -0.05    0.11
  -1  -7  -6    0.29    0.15
  -1  -7  -6    0.04    0.14
  -1   7  -6    0.21    0.11
   1   7   6    0.08    0.13
   1   7   6    0.09    0.16
  -1   7  -6    0.00    0.09
  -2  -7  -6    0.88    0.21
  -2  -7  -6    1.45    0.25
   2  -7   6    1.84    0.27
  -2   7  -6    1.21    0.18
   2   7   6    1.25    0.21
  -2   7  -6    1.30    0.17
   2   7   6    1.61    0.22
  -3  -7  -6    1.70    0.26
  -3  -7  -6    2.10    0.29
   3  -7   6    2.26    0.34
  -3   7  -6    1.93    0.20
   3   7   6    1.90    0.26
   3   7   6    1.56    0.26
  -3   7  -6    1.89    0.21
  -4  -7  -6    5.98    0.40
   4  -7   6    5.59    0.48
  -4  -7  -6    6.04    0.47
  -4   7  -6    5.36    0.31
   4   7   6    5.46    0.44
  -4   7  -6    5.73    0.32
   4   7   6    6.24    0.45
   5  -7   6   -0.06    0.29
  -5  -7  -6    0.44    0.33
  -5  -7  -6    0.16    0.21
  -5   7  -6    0.80    0.18
   5   7   6    0.20    0.24
   5   7   6    0.68    0.24
  -5   7  -6    0.48    0.19
  -6  -7  -6    1.87    0.32
   6  -7   6    1.78    0.42
  -6  -7  -6    1.48    0.52
  -6  -7  -6    1.38    0.36
   6   7   6    1.90    0.35
  -6   7  -6    1.58    0.25
   6   7   6    2.22    0.36
  -6   7  -6    1.72    0.30
  -7  -7  -6    0.55    0.35
  -7  -7  -6    0.08    0.33
   7  -7   6    0.70    0.49
   7   7   6    0.06    0.34
  -7   7  -6    0.55    0.34
   7   7   6    0.69    0.32
  -7   7  -6    0.20    0.24
  -8  -7  -6    0.77    0.41
  -8  -7  -6    1.24    0.46
   8   7   6    0.80    0.50
  -8   7  -6    1.07    0.32
   8   7   6    0.48    0.39
  -8   7  -6    0.94    0.48
  -9  -7  -6    0.14    0.55
  -9  -7  -6    1.32    0.56
   9   7   6    1.10    0.47
  -9   7  -6    1.58    0.41
 -10  -8   6    1.67    0.59
  10  -8  -6    0.84    0.43
  10   8  -6    1.46    0.60
 -10   8   6    2.55    0.52
   9  -8  -6    2.94    0.89
  -9  -8   6    0.99    0.49
   9  -8  -6    1.29    0.38
  -9   8   6    2.47    0.43
   9   8  -6    0.35    0.47
   8  -8  -6    0.21    0.44
   8  -8  -6    0.18    0.29
  -8  -8   6   -0.15    0.36
  -8   8   6    0.51    0.29
   8   8  -6    0.23    0.37
  -7  -8   6    1.86    0.33
   7  -8  -6    2.90    0.42
  -7  -8   6    1.96    0.43
  -7   8   6    1.53    0.32
   7   8  -6    1.60    0.37
   6  -8  -6   11.24    0.69
   6  -8  -6   10.45    0.57
  -6  -8   6   11.23    0.70
  -6  -8   6    9.42    0.55
  -6   8   6   10.68    0.72
   6   8  -6   10.33    0.66
   6   8  -6    8.99    0.74
  -6   8   6    9.77    0.58
  -5  -8   6    2.03    0.26
   5  -8  -6    2.38    0.34
  -5  -8   6    2.09    0.34
   5  -8  -6    1.71    0.28
   5   8  -6    2.39    0.36
  -5   8   6    2.32    0.37
  -5   8   6    1.92    0.28
   5   8  -6    1.92    0.33
  -4  -8   6    3.77    0.32
  -4  -8   6    3.38    0.42
   4  -8  -6    3.65    0.38
   4  -8  -6    3.27    0.42
  -4   8   6    3.24    0.42
   4   8  -6    3.73    0.40
  -4   8   6    3.46    0.36
   4   8  -6    3.62    0.46
  -3  -8   6    8.41    0.39
  -3  -8   6    8.79    0.49
   3  -8  -6    8.39    0.47
   3  -8  -6    8.48    0.52
   3   8  -6    8.10    0.47
  -3   8   6    8.52    0.51
   3   8  -6    8.94    0.85
  -3   8   6    8.55    0.48
   2  -8  -6    0.99    0.22
   2  -8  -6    0.84    0.20
  -2  -8   6    1.12    0.16
  -2  -8   6    1.05    0.20
   2   8  -6    0.96    0.22
   2   8  -6    1.13    0.19
  -2   8   6    0.83    0.22
  -1  -8   6    5.67    0.31
   1  -8  -6    5.42    0.40
   1  -8  -6    5.24    0.41
  -1  -8   6    5.24    0.26
  -1   8   6    5.62    0.36
   1   8  -6    5.56    0.32
  -1   8   6    4.46    0.39
   1   8  -6    5.86    0.44
   0  -8  -6    1.31    0.20
   0  -8  -6    1.29    0.23
   0   8   6    1.43    0.23
   0   8  -6    1.69    0.21
   0   8   6    1.41    0.20
   0   8  -6    1.47    0.20
  -1  -8  -6   10.65    0.50
  -1  -8  -6   11.27    0.57
   1  -8   6   11.13    0.45
  -1   8  -6   11.11    0.46
   1   8   6   11.53    0.51
  -1   8  -6   11.35    0.42
   1   8   6   11.55    0.56
   2  -8   6    1.04    0.21
  -2  -8  -6    1.13    0.24
   2   8   6    1.07    0.20
   2   8   6    0.91    0.23
  -2   8  -6    1.29    0.16
  -2   8  -6    1.20    0.16
   3  -8   6    5.52    0.43
  -3  -8  -6    5.79    0.41
  -3  -8  -6    5.54    0.47
   3   8   6    5.77    0.43
   3   8   6    4.59    0.45
  -3   8  -6    5.61    0.30
  -3   8  -6    5.45    0.31
  -4  -8  -6    0.31    0.30
  -4  -8  -6    0.24    0.19
   4  -8   6    0.08    0.25
  -4   8  -6    0.11    0.16
  -4   8  -6    0.30    0.14
   4   8   6   -0.06    0.20
   4   8   6   -0.26    0.23
   5  -8   6    2.87    0.41
  -5  -8  -6    2.89    0.40
  -5  -8  -6    2.19    0.39
  -5   8  -6    2.45    0.36
   5   8   6    2.77    0.37
  -5   8  -6    2.69    0.30
  -6  -8  -6    3.15    0.44
   6  -8   6    2.84    0.48
  -6  -8  -6    3.15    0.44
  -6   8  -6    2.30    0.61
  -6   8  -6    3.40    0.36
   6   8   6    2.09    0.38
   6   8   6    2.87    0.43
  -7  -8  -6   -0.04    0.36
  -7  -8  -6    0.87    0.39
  -7   8  -6    0.48    0.37
   7   8   6   -0.03    0.32
  -7   8  -6    0.46    0.26
  -8  -8  -6    1.22    0.47
  -8  -8  -6    2.74    0.54
  -8   8  -6    2.19    0.55
  -8   8  -6    2.37    0.53
   8   8   6    3.36    0.52
  -9  -8  -6    0.46    0.56
  -9  -8  -6   -0.20    0.56
   9   8   6    0.92    0.52
  -9   8  -6    1.04    0.43
   9  -9  -6    0.46    0.35
  -9  -9   6   -0.08    0.52
   9   9  -6    0.83    0.52
  -9   9   6    0.14    0.38
  -8  -9   6    0.55    0.43
   8  -9  -6    0.73    0.51
   8   9  -6    0.77    0.44
  -8   9   6    0.15    0.30
  -7  -9   6    0.30    0.38
   7  -9  -6    0.48    0.29
   7  -9  -6    0.62    0.41
  -7   9   6    0.55    0.29
   7   9  -6    0.73    0.37
   6  -9  -6    7.39    0.65
  -6  -9   6    6.50    0.64
   6  -9  -6    6.39    0.58
  -6  -9   6    6.09    0.48
   6   9  -6    5.82    0.59
  -6   9   6    6.16    0.50
   5  -9  -6    5.51    0.55
  -5  -9   6    6.17    0.42
   5  -9  -6    5.86    0.46
  -5  -9   6    5.28    0.55
   5   9  -6    5.92    0.52
  -5   9   6    5.92    0.47
   5   9  -6    6.60    0.63
  -5   9   6    6.57    0.60
   4  -9  -6    0.50    0.26
  -4  -9   6    0.67    0.26
   4  -9  -6    0.22    0.20
  -4  -9   6    0.36    0.22
  -4   9   6    0.68    0.29
   4   9  -6    0.82    0.26
  -4   9   6    0.22    0.23
   4   9  -6    0.22    0.29
  -3  -9   6    2.08    0.30
   3  -9  -6    1.97    0.31
   3  -9  -6    2.11    0.29
  -3   9   6    1.72    0.30
  -3   9   6    2.20    0.29
   3   9  -6    1.23    0.29
   3   9  -6    1.96    0.28
  -2  -9   6    0.10    0.14
  -2  -9   6    0.15    0.19
   2  -9  -6    0.20    0.21
   2  -9  -6    0.10    0.19
  -2   9   6    0.35    0.23
   2   9  -6    0.37    0.26
  -2   9   6    0.15    0.18
   2   9  -6    0.09    0.17
  -1  -9   6    5.70    0.29
  -1  -9   6    5.78    0.35
   1  -9  -6    5.23    0.43
   1  -9  -6    5.25    0.42
   1   9  -6    6.23    0.35
  -1   9   6    5.99    0.46
  -1   9   6    6.35    0.39
   1   9  -6    6.27    0.42
   0  -9  -6    0.43    0.20
   0  -9   6    0.43    0.11
   0  -9   6    0.74    0.14
   0  -9  -6    0.36    0.20
   0   9   6    0.51    0.21
   0   9  -6    0.69    0.15
   0   9   6    0.50    0.18
   0   9  -6    0.42    0.18
   1  -9   6    1.00    0.17
  -1  -9  -6    0.83    0.23
  -1  -9  -6    0.71    0.24
  -1   9  -6    0.94    0.16
   1   9   6    0.88    0.20
   1   9   6    1.02    0.25
  -2  -9  -6   10.97    0.54
   2  -9   6   10.47    0.51
  -2  -9  -6   10.82    0.61
   2   9   6   10.80    0.53
   2   9   6   10.42    0.60
  -2   9  -6    9.99    0.57
  -3  -9  -6    3.23    0.34
  -3   9  -6    2.87    0.26
   3   9   6    3.59    0.46
   3   9   6    2.74    0.39
  -4  -9  -6    0.27    0.28
  -4  -9  -6    0.60    0.24
   4  -9   6    0.10    0.53
   4   9   6    0.27    0.30
   4   9   6    0.35    0.24
  -4   9  -6    0.52    0.17
  -4   9  -6    0.67    0.20
   5  -9   6    5.51    0.61
  -5  -9  -6    5.32    0.59
  -5   9  -6    4.59    0.36
   5   9   6    4.19    0.61
   5   9   6    4.56    0.52
  -5   9  -6    5.97    0.54
   6  -9   6    4.47    0.59
  -6  -9  -6    5.97    0.68
  -6  -9  -6    4.50    0.53
  -6   9  -6    5.28    0.41
   6   9   6    4.71    0.59
  -6   9  -6    4.31    0.57
  -7  -9  -6    0.19    0.40
  -7  -9  -6    0.24    0.39
  -7   9  -6    1.34    0.43
   7   9   6    0.44    0.38
  -7   9  -6    0.15    0.25
  -8  -9  -6   -0.15    0.48
  -8  -9  -6    0.14    0.48
   8   9   6    0.61    0.46
  -8   9  -6    0.24    0.32
  -9 -10   6   -0.06    0.55
   9 -10  -6    0.22    0.38
  -9  10   6    0.19    0.38
   9  10  -6   -0.80    0.58
  -8 -10   6    0.35    0.48
   8 -10  -6    0.32    0.34
   8  10  -6    0.21    0.46
  -8  10   6    0.71    0.33
   7 -10  -6    0.12    0.30
  -7 -10   6    0.23    0.41
   7 -10  -6    0.92    0.47
   7  10  -6    0.30    0.38
  -7  10   6    0.22    0.29
  -6 -10   6    0.35    0.26
   6 -10  -6   -0.01    0.27
  -6 -10   6    0.31    0.35
   6 -10  -6    0.94    0.40
  -6  10   6    0.24    0.24
   6  10  -6    0.46    0.33
  -5 -10   6    0.84    0.33
  -5 -10   6    0.02    0.22
   5 -10  -6    0.68    0.34
  -5  10   6    0.55    0.24
   5  10  -6    0.55    0.29
   4 -10  -6    1.99    0.34
   4 -10  -6    1.75    0.31
  -4 -10   6    1.70    0.24
  -4 -10   6    2.07    0.35
  -4  10   6    1.36    0.27
  -4  10   6    1.79    0.38
   4  10  -6    2.56    0.40
   4  10  -6    1.99    0.33
   3 -10  -6    0.04    0.23
  -3 -10   6   -0.15    0.17
   3 -10  -6    0.51    0.27
  -3 -10   6   -0.22    0.24
  -3  10   6   -0.30    0.27
   3  10  -6   -0.06    0.27
   3  10  -6    0.15    0.21
  -2 -10   6    0.74    0.17
   2 -10  -6    0.56    0.24
   2 -10  -6    0.54    0.24
  -2 -10   6    1.15    0.24
   2  10  -6    0.85    0.22
  -2  10   6    1.16    0.29
   2  10  -6    0.90    0.28
   1 -10  -6    9.67    0.54
  -1 -10   6   10.57    0.47
   1 -10  -6   10.88    0.60
  -1 -10   6   10.15    0.41
   1  10  -6    9.54    0.56
  -1  10   6   10.15    0.62
  -1  10   6   10.30    0.62
   1  10  -6   10.32    0.49
   0 -10  -6   13.02    0.59
   0 -10   6   12.14    0.41
   0 -10  -6   11.90    0.65
   0 -10   6   12.59    0.43
   0 -10   6   11.98    0.43
   0  10  -6   12.26    0.51
   0  10   6   12.40    0.65
   0  10   6   12.74    0.76
  -1 -10  -6   10.93    0.92
  -1 -10  -6   10.55    0.55
   1 -10   6   11.25    0.48
  -1  10  -6   12.11    0.55
   1  10   6   11.06    0.77
  -1  10  -6   11.57    0.48
   1  10   6   12.06    0.66
  -2 -10  -6    6.10    0.46
  -2 -10  -6    5.95    0.54
   2 -10   6    5.57    0.42
   2  10   6    6.36    0.45
  -2  10  -6    5.40    0.33
  -2  10  -6    6.10    0.41
   2  10   6    4.45    0.54
   3 -10   6    2.20    0.32
  -3 -10  -6    1.88    0.35
   3  10   6    1.85    0.37
  -3  10  -6    2.57    0.33
   3  10   6    2.41    0.34
  -3  10  -6    2.27    0.30
  -4 -10  -6    1.02    0.35
   4 -10   6    0.64    0.33
  -4  10  -6    1.32    0.29
   4  10   6    1.46    0.47
  -4  10  -6    0.89    0.20
   4  10   6    0.50    0.28
   5 -10   6    0.60    0.39
  -5 -10  -6    0.67    0.36
  -5  10  -6    0.18    0.29
  -5  10  -6    0.31    0.20
   5  10   6    0.59    0.31
  -6 -10  -6   -0.23    0.41
   6 -10   6    0.85    0.52
  -6  10  -6    0.06    0.23
  -6  10  -6    0.68    0.39
   6  10   6    0.50    0.35
  -7 -10  -6    0.33    0.43
  -7 -10  -6   -0.16    0.47
   7  10   6    0.26    0.43
  -7  10  -6    0.30    0.27
  -8 -10  -6   -0.32    0.52
  -8 -10  -6   -0.04    0.55
  -8  10  -6    0.52    0.35
   8  10   6   -0.89    0.50
   8 -11  -6    0.01    0.39
  -8 -11   6    0.57    0.52
   8  11  -6    0.41    0.55
  -8  11   6   -0.07    0.37
  -7 -11   6    1.35    0.48
   7 -11  -6    0.53    0.35
  -7  11   6    0.70    0.32
   7  11  -6    0.02    0.41
  -6 -11   6   -0.20    0.39
   6 -11  -6    1.17    0.48
  -6 -11   6   -0.17    0.34
   6 -11  -6    0.11    0.31
   6  11  -6   -0.02    0.35
  -6  11   6    0.22    0.28
   5 -11  -6    1.25    0.31
   5 -11  -6    0.96    0.40
  -5 -11   6    0.54    0.37
  -5 -11   6    0.69    0.27
  -5  11   6    0.88    0.27
   5  11  -6   -0.30    0.32
   4 -11  -6    0.41    0.27
   4 -11  -6    0.91    0.34
  -4 -11   6    0.45    0.30
  -4 -11   6   -0.05    0.22
   4  11  -6   -0.05    0.27
  -4  11   6    0.49    0.25
  -3 -11   6    0.40    0.27
   3 -11  -6    0.17    0.26
   3 -11  -6    0.21    0.31
  -3 -11   6    0.14    0.19
   3  11  -6    0.91    0.36
   3  11  -6    0.19    0.24
  -3  11   6   -0.14    0.20
  -2 -11   6    1.81    0.25
   2 -11  -6    1.91    0.34
  -2 -11   6    1.78    0.30
   2 -11  -6    1.67    0.32
  -2  11   6    1.83    0.36
  -2  11   6    1.41    0.26
   2  11  -6    1.55    0.35
   2  11  -6    1.66    0.27
   1 -11  -6    1.63    0.31
  -1 -11   6    2.07    0.26
  -1 -11   6    1.15    0.23
   1 -11  -6    1.74    0.28
   1  11  -6    1.39    0.24
   1  11  -6    1.36    0.32
  -1  11   6    0.73    0.33
  -1  11   6    1.52    0.26
   0 -11   6    1.77    0.20
   0 -11  -6    1.51    0.28
   0 -11  -6    1.71    0.33
   0 -11   6    1.70    0.22
   0  11  -6    1.81    0.30
   0  11   6    1.28    0.33
   0  11  -6    1.70    0.24
   0  11   6    1.90    0.28
   1 -11   6    1.74    0.24
  -1 -11  -6    1.56    0.34
  -1 -11  -6    1.93    0.30
   1  11   6    2.05    0.29
  -1  11  -6    1.99    0.30
  -1  11  -6    1.88    0.23
   1  11   6    1.75    0.38
  -2 -11  -6    1.48    0.35
   2 -11   6    0.89    0.26
  -2 -11  -6    0.73    0.30
  -2  11  -6    0.77    0.25
  -2  11  -6    0.76    0.19
   2  11   6    0.68    0.25
   3 -11   6    0.02    0.29
  -3 -11  -6   -0.08    0.31
  -3  11  -6    0.14    0.24
   3  11   6    0.05    0.26
   4 -11   6    0.59    0.37
  -4 -11  -6    0.39    0.37
   4  11   6    0.29    0.30
  -4  11  -6    0.09    0.29
  -4  11  -6    0.68    0.21
  -5 -11  -6   -0.23    0.37
   5 -11   6    0.51    0.47
  -5  11  -6    0.03    0.21
   5  11   6    0.16    0.35
  -5  11  -6   -0.50    0.34
  -6 -11  -6   -0.29    0.47
  -6  11  -6    0.03    0.28
   6  11   6    0.12    0.40
  -6  11  -6    0.73    0.53
  -7 -11  -6    0.65    0.49
  -7 -11  -6   -0.21    0.55
  -7  11  -6    0.87    0.31
   7  11   6    0.07    0.46
   7 -12  -6    0.09    0.40
  -7 -12   6    0.82    0.54
   7  12  -6    1.00    0.53
  -7  12   6    0.75    0.38
  -6 -12   6    7.64    0.84
   6 -12  -6    7.60    0.67
   6  12  -6    6.46    0.69
  -6  12   6    7.57    0.65
   5 -12  -6   -0.20    0.48
  -5 -12   6   -0.67    0.39
   5 -12  -6   -0.34    0.31
   5  12  -6    0.50    0.37
  -5  12   6    0.24    0.30
  -4 -12   6    0.39    0.26
  -4 -12   6    0.18    0.35
   4 -12  -6   -0.23    0.29
   4  12  -6    0.07    0.32
   3 -12  -6    1.36    0.34
   3 -12  -6    2.23    0.41
  -3 -12   6    1.88    0.27
   3  12  -6    1.85    0.35
  -3  12   6    1.65    0.30
   2 -12  -6    0.50    0.33
  -2 -12   6    0.46    0.28
   2 -12  -6   -0.34    0.26
  -2 -12   6    0.50    0.21
   2  12  -6    0.19    0.25
   2  12  -6   -0.30    0.34
  -2  12   6    0.42    0.22
   1 -12  -6    0.15    0.27
   1 -12  -6    1.09    0.31
  -1 -12   6    0.74    0.20
  -1 -12   6    0.66    0.24
   1  12  -6    0.43    0.32
  -1  12   6    0.62    0.22
   1  12  -6    0.50    0.24
   0 -12  -6   -0.14    0.28
   0  12   6   -0.01    0.20
   0  12  -6   -0.29    0.18
   0  12  -6    0.59    0.30
   1 -12   6    1.76    0.26
  -1 -12  -6    1.62    0.35
  -1  12  -6    1.80    0.25
  -1  12  -6    2.16    0.35
   1  12   6    1.77    0.30
  -2 -12  -6    0.46    0.35
   2 -12   6    0.26    0.28
  -2  12  -6    0.39    0.19
  -2  12  -6    0.15    0.29
   2  12   6    0.41    0.27
  -3 -12  -6    0.04    0.38
   3 -12   6    0.26    0.35
  -3  12  -6   -0.05    0.18
   3  12   6    0.09    0.28
  -3  12  -6    0.84    0.32
  -4 -12  -6   -0.81    0.38
   4 -12   6    0.89    0.45
   4  12   6   -0.23    0.32
  -4  12  -6    0.36    0.37
   5 -12   6    1.77    0.58
  -5 -12  -6    2.22    0.54
   5  12   6    3.24    0.52
  -5  12  -6    2.62    0.35
  -5  12  -6    2.32    0.51
  -6 -12  -6    1.00    0.57
  -6 -12  -6    0.39    0.47
  -6  12  -6    0.31    0.29
   6  12   6   -0.01    0.45
   6 -13  -6    3.51    0.50
  -6 -13   6    3.18    0.60
   6  13  -6    1.64    0.54
  -6  13   6    1.94    0.45
  -5 -13   6    0.12    0.46
   5 -13  -6    0.66    0.39
   5  13  -6   -0.34    0.42
  -4 -13   6   -0.03    0.31
  -4 -13   6   -0.31    0.41
   4 -13  -6    0.03    0.36
   4  13  -6    0.18    0.37
  -4  13   6   -0.29    0.26
   3 -13  -6    0.76    0.35
  -3 -13   6    0.82    0.38
  -3 -13   6    1.30    0.29
  -3  13   6    1.32    0.32
   3  13  -6    1.17    0.37
  -2 -13   6    0.40    0.32
   2 -13  -6    0.81    0.36
  -2 -13   6    0.68    0.25
   2  13  -6    0.89    0.30
  -2  13   6    0.60    0.26
  -1 -13   6    0.60    0.23
   1 -13  -6   -0.06    0.31
  -1 -13   6    1.04    0.27
  -1  13   6    0.42    0.25
   1  13  -6    0.91    0.27
   0 -13  -6    2.58    0.47
   0  13   6    1.92    0.32
   0  13  -6    2.25    0.63
   0  13  -6    2.08    0.30
   1 -13   6   -0.19    0.25
  -1 -13  -6    0.21    0.36
   1  13   6    0.07    0.27
  -1  13  -6   -0.73    0.35
  -1  13  -6    0.06    0.21
  -2 -13  -6    0.49    0.39
   2 -13   6   -0.10    0.42
  -2  13  -6    0.10    0.37
   2  13   6    0.04    0.28
  -3 -13  -6    1.04    0.45
  -3  13  -6    0.45    0.23
  -3  13  -6    0.35    0.46
   3  13   6    0.88    0.36
  -4 -13  -6    0.30    0.50
  -4  13  -6    0.49    0.25
   4  13   6   -0.17    0.38
  -5 -13  -6   -0.14    0.55
   5  13   6   -0.90    0.44
   5 -14  -6   -0.37    0.45
  -5 -14   6    1.33    0.53
  -5  14   6   -0.18    0.35
   5  14  -6    0.21    0.52
  -4 -14   6    0.42    0.48
   4 -14  -6    0.78    0.43
   4  14  -6   -0.58    0.43
  -4  14   6   -0.56    0.31
   3 -14  -6    1.43    0.43
  -3 -14   6    1.06    0.44
   3  14  -6    0.24    0.38
  -3  14   6   -0.22    0.27
  -2 -14   6    1.58    0.40
   2 -14  -6    0.87    0.42
   2  14  -6    0.78    0.35
  -2  14   6    0.61    0.29
   1 -14  -6   -0.23    0.40
  -1 -14   6    0.55    0.30
   1  14  -6    0.08    0.30
  -1  14   6   -0.10    0.29
   0 -14  -6    0.74    0.42
   0  14  -6   -0.11    0.27
   0  14   6    0.02    0.30
  -1 -14  -6    1.00    0.46
  -1  14  -6   -0.11    0.25
   1  14   6    0.13    0.32
  -2 -14  -6    1.25    0.50
   2  14   6    1.31    0.39
  -2  14  -6    1.21    0.30
  -3 -14  -6   -0.29    0.51
  -3  14  -6    0.06    0.27
   3  14   6    0.44    0.41
  -4 -14  -6    0.74    0.58
  -4  14  -6   -0.01    0.30
   4  14   6    0.32    0.50
   3 -15  -6    2.01    0.52
  -3  15   6    0.93    0.56
   3  15  -6    0.42    0.47
   2 -15  -6    1.56    0.50
  -2  15   6   -0.50    0.34
   2  15  -6   -0.28    0.42
   1 -15  -6    0.54    0.50
  -1  15   6    1.24    0.39
   1  15  -6    0.87    0.41
   0 -15  -6   -0.56    0.49
   0  15   6   -0.26    0.35
   0  15  -6    0.17    0.34
  -1 -15  -6    1.65    0.57
   1  15   6    1.61    0.45
  -1  15  -6    1.75    0.38
  -2 -15  -6    1.31    0.60
  -2  15  -6    1.18    0.36
  12   0  -7   -0.57    0.53
  11   0  -7    0.33    0.43
 -11   0   7    0.67    0.48
 -10   0   7    0.83    0.41
  10   0  -7    0.77    0.38
  -9   0   7    0.02    0.30
   9   0  -7   -0.07    0.30
   9   0  -7    0.91    0.45
   9   0  -7   -0.03    0.43
  -8   0   7   -0.19    0.28
   8   0  -7    0.04    0.34
   8   0  -7    0.15    0.26
   8   0  -7    0.67    0.34
  -7   0   7   -0.21    0.25
   7   0  -7   -0.16    0.24
   7   0  -7    0.08    0.22
  -7   0   7    0.06    0.23
  -6   0   7   -0.08    0.21
   6   0  -7    0.00    0.18
  -6   0   7   -0.12    0.22
   6   0  -7   -0.25    0.22
  -5   0   7    0.21    0.26
  -5   0   7   -0.06    0.17
   5   0  -7    0.15    0.19
   5   0  -7    0.10    0.16
   4   0  -7    0.17    0.15
  -4   0   7    0.20    0.15
  -4   0   7   -0.27    0.12
   4   0  -7    0.04    0.12
  -3   0   7    0.01    0.11
   3   0  -7   -0.05    0.11
  -3   0   7   -0.12    0.10
   3   0  -7   -0.07    0.10
   2   0  -7   -0.06    0.09
   2   0  -7   -0.02    0.09
  -2   0   7    0.03    0.09
  -2   0   7   -0.01    0.09
   1   0  -7    0.09    0.08
  -1   0   7    0.04    0.06
  -1   0   7    0.03    0.07
   1   0  -7    0.05    0.08
   0   0   7    0.07    0.04
   0   0  -7    0.00    0.07
   0   0   7    0.08    0.03
   0   0  -7   -0.04    0.05
  -1   0  -7    0.10    0.06
  -1   0  -7   -0.05    0.04
  -2   0  -7    0.06    0.06
  -2   0  -7   -0.05    0.05
  -3   0  -7    0.01    0.08
  -3   0  -7   -0.04    0.08
  -4   0  -7    0.10    0.11
  -4   0  -7    0.40    0.19
  -4   0  -7   -0.01    0.12
  -5   0  -7    0.09    0.15
  -5   0  -7    0.16    0.22
  -5   0  -7    0.03    0.14
  -6   0  -7    0.15    0.20
  -6   0  -7    0.32    0.28
  -6   0  -7   -0.31    0.16
  -7   0  -7    0.08    0.25
  -7   0  -7   -0.46    0.27
  -7   0  -7    0.08    0.22
  -8   0  -7    0.01    0.33
  -8   0  -7   -0.27    0.27
  -9   0  -7   -0.85    0.46
  -9   0  -7    0.89    0.37
 -10   0  -7    0.28    0.44
  12  -1  -7    1.83    0.56
  12   1  -7    1.29    0.60
  11  -1  -7    1.50    0.46
 -11  -1   7    1.47    0.52
  11   1  -7    1.37    0.49
 -11   1   7    1.79    0.49
 -10  -1   7    1.29    0.44
  10  -1  -7    0.91    0.40
  10   1  -7    1.20    0.41
 -10   1   7    0.82    0.39
   9  -1  -7    0.21    0.48
   9  -1  -7    0.82    0.33
  -9  -1   7    0.30    0.32
   9  -1  -7    0.99    0.44
   9   1  -7    0.21    0.42
   9   1  -7    0.69    0.44
  -9   1   7    0.35    0.31
   9   1  -7    1.22    0.36
   8  -1  -7   19.88    0.99
   8  -1  -7   21.15    0.96
   8  -1  -7   20.62    0.91
  -8  -1   7   23.66    0.97
  -8   1   7   21.87    0.97
   8   1  -7   20.27    0.98
   8   1  -7   20.53    0.98
  -8   1   7   18.93    1.20
   8   1  -7   19.25    1.24
   7  -1  -7   -0.07    0.21
  -7  -1   7    0.23    0.26
   7  -1  -7    0.06    0.27
  -7  -1   7   -0.08    0.25
  -7   1   7    0.17    0.26
   7   1  -7    0.21    0.24
   7   1  -7    0.17    0.23
   7   1  -7    0.05    0.24
  -7   1   7   -0.04    0.22
   6  -1  -7    0.24    0.27
  -6  -1   7    0.11    0.23
   6  -1  -7    0.25    0.19
  -6  -1   7    0.35    0.22
   6   1  -7    0.17    0.36
   6   1  -7    0.14    0.21
  -6   1   7    0.19    0.22
  -6   1   7    0.22    0.22
  -5  -1   7    2.66    0.33
   5  -1  -7    2.31    0.30
   5  -1  -7    2.56    0.34
  -5   1   7    2.31    0.31
  -5   1   7    2.51    0.32
   5   1  -7    2.97    0.32
   5   1  -7    2.38    0.34
  -4  -1   7    0.17    0.15
   4  -1  -7    0.47    0.17
   4  -1  -7    0.34    0.15
  -4  -1   7    0.29    0.14
  -4   1   7    0.21    0.16
   4   1  -7    0.47    0.15
  -4   1   7    0.26    0.15
   4   1  -7    0.41    0.17
   3  -1  -7    9.96    0.43
  -3  -1   7   10.21    0.41
  -3  -1   7    9.33    0.40
   3  -1  -7    9.72    0.43
   3   1  -7    9.78    0.43
  -3   1   7    9.86    0.41
   3   1  -7    9.31    0.42
  -3   1   7   10.16    0.43
  -2  -1   7   55.49    1.53
   2  -1  -7   52.33    1.58
  -2  -1   7   57.86    1.55
   2  -1  -7   49.93    1.56
   2   1  -7   57.10    1.58
  -2   1   7   56.78    1.54
   2   1  -7   56.90    1.57
  -2   1   7   55.49    1.58
  -1  -1   7   15.64    0.47
   1  -1  -7   16.36    0.51
   1  -1  -7   16.49    0.54
  -1   1   7   16.07    0.49
   1   1  -7   16.94    0.52
  -1   1   7   15.51    0.53
   1   1  -7   15.47    0.50
   0  -1  -7   55.32    1.50
   0  -1  -7   53.84    1.47
   0   1  -7   54.15    1.46
   0   1  -7   52.29    1.44
   0   1   7   53.13    1.48
   0   1   7   54.30    1.46
  -1  -1  -7    2.72    0.16
  -1  -1  -7    2.84    0.14
   1   1   7    2.92    0.15
   1   1   7    2.87    0.15
  -2  -1  -7    0.85    0.13
  -2  -1  -7    0.84    0.11
  -2   1  -7    0.74    0.09
  -2   1  -7    0.80    0.07
   2   1   7    0.72    0.10
  -3  -1  -7   10.63    0.39
  -3  -1  -7   10.94    0.41
  -3   1  -7   10.58    0.51
  -3   1  -7   10.34    0.37
  -3   1  -7   10.67    0.36
   3   1   7   10.39    0.34
   3   1   7   10.85    0.36
  -4  -1  -7    9.17    0.40
  -4  -1  -7    9.91    0.52
  -4  -1  -7    8.98    0.41
  -4   1  -7    8.98    0.38
  -4   1  -7    9.23    0.38
   4   1   7    9.58    0.35
  -4   1  -7    9.76    0.54
   4   1   7    9.39    0.32
  -5  -1  -7   -0.08    0.22
  -5  -1  -7    0.06    0.15
  -5  -1  -7   -0.01    0.15
   5   1   7   -0.10    0.09
   5   1   7    0.06    0.11
  -5   1  -7    0.14    0.23
  -5   1  -7    0.04    0.14
  -5   1  -7   -0.03    0.14
  -6  -1  -7    0.00    0.19
  -6  -1  -7   -0.26    0.24
  -6  -1  -7    0.23    0.21
  -6   1  -7    0.19    0.31
  -6   1  -7   -0.32    0.22
   6   1   7   -0.05    0.13
  -6   1  -7   -0.18    0.17
   6   1   7    0.09    0.11
  -7  -1  -7    1.56    0.31
  -7  -1  -7    1.49    0.38
  -7  -1  -7    1.63    0.30
  -7   1  -7    1.49    0.46
  -7   1  -7    1.59    0.41
   7   1   7    1.36    0.17
   7   1   7    1.56    0.20
  -7   1  -7    1.49    0.29
  -8  -1  -7    1.24    0.44
  -8  -1  -7    0.51    0.34
  -8  -1  -7    0.91    0.34
   8   1   7    1.00    0.20
   8   1   7    0.91    0.19
  -8   1  -7    0.16    0.35
  -8   1  -7    1.11    0.31
  -9  -1  -7    3.56    0.49
   9   1   7    3.31    0.34
  -9   1  -7    2.28    0.51
   9   1   7    2.91    0.33
  -9   1  -7    3.88    0.48
 -10  -1  -7    0.77    0.45
 -10   1  -7    0.85    0.44
  11  -2  -7    0.55    0.43
 -11  -2   7    0.80    0.50
  11   2  -7    0.20    0.47
 -11   2   7    0.89    0.47
 -10  -2   7    1.11    0.41
  10  -2  -7    1.23    0.39
  10   2  -7    1.45    0.43
 -10   2   7    1.68    0.42
   9  -2  -7    0.53    0.32
   9  -2  -7   -0.12    0.40
   9  -2  -7    0.69    0.51
  -9  -2   7    0.30    0.36
  -9   2   7    0.33    0.32
   9   2  -7    0.63    0.36
   9   2  -7    1.30    0.42
   8  -2  -7    0.14    0.31
  -8  -2   7   -0.10    0.32
   8  -2  -7    0.01    0.24
  -8  -2   7    0.49    0.32
   8   2  -7    0.23    0.31
   8   2  -7   -0.37    0.30
  -8   2   7   -0.07    0.26
  -8   2   7    0.19    0.31
   8   2  -7    0.19    0.34
  -7  -2   7    3.31    0.41
   7  -2  -7    3.77    0.48
  -7  -2   7    4.16    0.48
   7  -2  -7    3.63    0.43
   7   2  -7    3.07    0.45
   7   2  -7    3.49    0.49
  -7   2   7    3.94    0.48
   7   2  -7    3.33    0.40
  -7   2   7    3.48    0.45
   6  -2  -7    4.07    0.39
  -6  -2   7    4.25    0.44
   6  -2  -7    4.58    0.62
  -6  -2   7    4.85    0.43
  -6   2   7    4.28    0.43
   6   2  -7    4.45    0.41
   6   2  -7    3.59    0.49
   6   2  -7    3.91    0.38
  -6   2   7    3.84    0.47
   5  -2  -7    6.89    0.42
   5  -2  -7    6.41    0.43
  -5  -2   7    6.58    0.43
   5   2  -7    6.41    0.42
  -5   2   7    6.52    0.43
  -5   2   7    6.26    0.43
   5   2  -7    6.41    0.44
   4  -2  -7    0.24    0.15
   4  -2  -7    0.38    0.14
  -4  -2   7    0.53    0.15
  -4  -2   7    0.26    0.15
   4   2  -7    0.35    0.16
  -4   2   7    0.32    0.14
   4   2  -7    0.49    0.16
  -4   2   7    0.51    0.17
  -3  -2   7   50.06    1.46
   3  -2  -7   50.92    1.50
  -3  -2   7   51.80    1.47
   3  -2  -7   51.65    1.49
   3   2  -7   49.95    1.50
  -3   2   7   50.65    1.51
  -3   2   7   49.37    1.46
   3   2  -7   50.66    1.49
  -2  -2   7   17.73    0.55
   2  -2  -7   18.35    0.61
  -2  -2   7   18.04    0.56
   2  -2  -7   17.09    0.60
   2   2  -7   18.48    0.60
   2   2  -7   17.47    0.59
  -2   2   7   17.09    0.61
  -2   2   7   17.78    0.57
   1  -2  -7   25.28    0.78
   1  -2  -7   24.68    0.76
  -1   2   7   24.78    0.78
   1   2  -7   25.65    0.74
   1   2  -7   25.69    0.74
  -1   2   7   25.41    0.75
   0  -2  -7    2.34    0.17
   0  -2  -7    2.46    0.18
   0   2   7    2.88    0.15
   0   2   7    2.74    0.18
   0   2  -7    2.49    0.11
   0   2  -7    2.58    0.10
  -1  -2  -7    1.44    0.14
  -1  -2  -7    1.38    0.15
   1   2   7    1.39    0.15
   1   2   7    1.64    0.14
  -2  -2  -7    5.00    0.23
  -2  -2  -7    4.79    0.25
  -2   2  -7    5.03    0.32
   2   2   7    4.78    0.22
   2   2   7    5.13    0.24
  -3  -2  -7    6.82    0.30
  -3  -2  -7    6.56    0.33
  -3   2  -7    6.48    0.25
   3   2   7    6.41    0.28
  -3   2  -7    6.57    0.41
  -3   2  -7    6.23    0.31
   3   2   7    6.80    0.30
  -4  -2  -7    0.03    0.12
  -4  -2  -7    0.22    0.14
  -4   2  -7    0.12    0.11
  -4   2  -7    0.21    0.21
  -4   2  -7    0.12    0.11
   4   2   7    0.18    0.11
   4   2   7    0.03    0.12
  -5  -2  -7    0.05    0.16
  -5  -2  -7    0.20    0.24
  -5  -2  -7    0.21    0.17
  -5   2  -7    0.30    0.15
  -5   2  -7    0.13    0.24
   5   2   7    0.22    0.15
  -5   2  -7    0.00    0.13
   5   2   7   -0.06    0.12
  -6  -2  -7   13.18    0.65
  -6  -2  -7   12.58    0.74
  -6   2  -7   13.71    0.76
   6   2   7   13.05    0.51
   6   2   7   13.91    0.56
  -6   2  -7   13.51    0.59
  -6   2  -7   13.62    0.59
  -7  -2  -7    1.12    0.30
  -7  -2  -7    1.15    0.36
  -7  -2  -7    0.98    0.29
   7   2   7    1.65    0.22
   7   2   7    1.68    0.24
  -7   2  -7    1.83    0.28
  -7   2  -7    1.58    0.30
  -8  -2  -7    4.66    0.57
  -8  -2  -7    4.34    0.58
  -8  -2  -7    5.55    0.67
   8   2   7    5.87    0.44
   8   2   7    5.54    0.40
  -8   2  -7    5.31    0.54
  -8   2  -7    4.63    0.59
  -9  -2  -7    0.04    0.36
   9   2   7   -0.04    0.26
   9   2   7    0.14    0.26
  -9   2  -7   -0.92    0.44
  -9   2  -7    0.27    0.35
 -10  -2  -7    1.90    0.52
 -10   2  -7    2.39    0.52
  11  -3  -7    3.07    0.51
 -11  -3   7    2.21    0.57
  11   3  -7    1.86    0.53
 -11   3   7    1.78    0.49
  10  -3  -7    0.60    0.35
 -10  -3   7    0.38    0.40
 -10   3   7    0.65    0.38
  10   3  -7    0.80    0.42
  10   3  -7    0.15    0.53
  -9  -3   7   -0.02    0.33
   9  -3  -7    0.76    0.45
   9  -3  -7    0.31    0.29
  -9   3   7    0.58    0.32
   9   3  -7    0.63    0.34
   9   3  -7    0.65    0.42
  -8  -3   7    5.04    0.58
   8  -3  -7    5.34    0.58
   8  -3  -7    4.56    0.60
  -8  -3   7    5.36    0.57
  -8   3   7    4.96    0.51
   8   3  -7    6.10    0.68
   8   3  -7    5.04    0.54
  -8   3   7    4.13    0.61
   8   3  -7    4.37    0.54
  -7  -3   7    0.97    0.29
   7  -3  -7    0.61    0.24
   7  -3  -7    0.46    0.30
  -7  -3   7    0.49    0.27
   7   3  -7    0.66    0.26
   7   3  -7    0.86    0.28
  -7   3   7    0.80    0.28
  -7   3   7    1.06    0.30
   7   3  -7    0.85    0.30
   6  -3  -7    2.61    0.35
  -6  -3   7    2.84    0.36
   6  -3  -7    3.28    0.43
  -6  -3   7    2.76    0.44
  -6   3   7    2.22    0.31
  -6   3   7    2.69    0.40
   6   3  -7    2.75    0.34
   6   3  -7    3.29    0.36
   6   3  -7    2.87    0.37
   5  -3  -7    1.07    0.21
  -5  -3   7    1.37    0.23
  -5  -3   7    0.68    0.22
   5  -3  -7    1.21    0.24
   5   3  -7    1.31    0.25
  -5   3   7    1.03    0.24
   5   3  -7    1.22    0.26
  -5   3   7    0.91    0.20
   5   3  -7    1.42    0.20
   4  -3  -7    0.61    0.17
  -4  -3   7    0.56    0.15
  -4  -3   7    0.45    0.17
   4  -3  -7    0.58    0.27
  -4   3   7    0.50    0.17
  -4   3   7    0.62    0.20
   4   3  -7    0.67    0.18
   4   3  -7    0.39    0.17
   3  -3  -7    0.15    0.13
  -3  -3   7    0.28    0.13
   3  -3  -7    0.03    0.13
  -3  -3   7    0.26    0.11
  -3   3   7    0.05    0.13
   3   3  -7    0.18    0.14
   3   3  -7    0.25    0.13
  -3   3   7    0.05    0.13
  -2  -3   7   35.00    0.98
  -2  -3   7   34.29    0.96
   2  -3  -7   34.09    1.03
   2  -3  -7   34.32    1.04
   2   3  -7   32.59    1.03
   2   3  -7   33.74    1.01
  -2   3   7   33.52    1.05
  -2   3   7   34.13    1.01
   1  -3  -7    5.46    0.27
   1  -3  -7    5.42    0.28
   1   3  -7    5.48    0.25
  -1   3   7    5.54    0.29
   1   3  -7    5.80    0.24
  -1   3   7    5.62    0.26
   0  -3  -7    4.42    0.25
   0  -3  -7    4.32    0.23
   0   3   7    4.47    0.22
   0   3   7    4.54    0.25
   0   3  -7    4.45    0.15
   0   3  -7    4.39    0.17
  -1  -3  -7    1.24    0.17
  -1  -3  -7    1.37    0.16
   1   3   7    1.62    0.16
   1   3   7    1.65    0.17
  -1   3  -7    1.72    0.20
  -2  -3  -7    0.35    0.12
  -2  -3  -7    0.32    0.10
  -2   3  -7    0.35    0.14
   2   3   7    0.15    0.10
   2   3   7    0.30    0.10
  -3  -3  -7   13.01    0.47
  -3  -3  -7   12.46    0.51
   3   3   7   13.07    0.48
   3   3   7   12.67    0.46
  -3   3  -7   11.93    0.39
  -3   3  -7   12.64    0.57
  -3   3  -7   12.57    0.38
  -4  -3  -7    0.32    0.24
  -4  -3  -7    0.12    0.14
  -4   3  -7    0.46    0.11
  -4   3  -7    0.11    0.11
   4   3   7    0.22    0.12
   4   3   7    0.27    0.14
  -4   3  -7    0.20    0.19
  -5  -3  -7    1.13    0.21
  -5  -3  -7    1.01    0.29
  -5  -3  -7    1.07    0.23
   5   3   7    0.96    0.20
   5   3   7    0.84    0.17
  -5   3  -7    0.80    0.17
  -5   3  -7    0.94    0.18
  -6  -3  -7   -0.04    0.21
  -6  -3  -7   -0.05    0.21
  -6  -3  -7   -0.40    0.26
  -6   3  -7    0.19    0.19
  -6   3  -7    0.05    0.17
   6   3   7    0.18    0.16
   6   3   7    0.39    0.20
  -7  -3  -7    3.50    0.47
  -7  -3  -7    4.43    0.59
  -7  -3  -7    4.84    0.52
  -7   3  -7    4.16    0.47
   7   3   7    3.91    0.42
  -7   3  -7    3.88    0.43
  -8  -3  -7    0.06    0.32
  -8  -3  -7    0.25    0.33
  -8  -3  -7    0.86    0.40
   8   3   7   -0.47    0.26
  -8   3  -7   -0.14    0.27
  -8   3  -7   -0.13    0.35
   8   3   7    0.50    0.24
  -9  -3  -7    0.22    0.40
  -9  -3  -7    0.15    0.48
  -9   3  -7   -0.58    0.45
   9   3   7   -0.29    0.30
   9   3   7    0.08    0.32
  -9   3  -7    0.05    0.34
 -10  -3  -7    0.28    0.52
  10   3   7    0.80    0.42
 -10   3  -7    1.91    0.48
 -11  -4   7    0.98    0.55
  11  -4  -7    1.14    0.43
  11   4  -7    1.18    0.54
 -11   4   7    0.56    0.50
  10  -4  -7   -0.45    0.33
 -10  -4   7    0.39    0.42
 -10   4   7    0.08    0.40
  10   4  -7    0.58    0.42
  -9  -4   7    3.85    0.51
   9  -4  -7    3.25    0.41
   9  -4  -7    2.80    0.50
  -9   4   7    3.72    0.47
   9   4  -7    3.47    0.48
   8  -4  -7    0.80    0.35
  -8  -4   7   -0.30    0.30
  -8  -4   7    0.18    0.30
  -8   4   7    0.25    0.29
   8   4  -7    0.45    0.31
   8   4  -7    0.01    0.30
   8   4  -7    0.51    0.37
  -8   4   7    0.65    0.39
   7  -4  -7    0.27    0.23
  -7  -4   7    0.49    0.25
  -7  -4   7   -0.28    0.25
   7  -4  -7    0.69    0.30
   7   4  -7   -0.07    0.24
  -7   4   7    0.91    0.31
   7   4  -7    0.10    0.24
  -7   4   7    0.14    0.24
   7   4  -7    0.11    0.31
   6  -4  -7    1.82    0.33
  -6  -4   7    1.21    0.29
  -6  -4   7    1.18    0.25
   6  -4  -7    1.36    0.26
  -6   4   7    1.17    0.26
  -6   4   7    1.18    0.29
   6   4  -7    1.52    0.24
   6   4  -7    1.53    0.30
   6   4  -7    1.60    0.30
  -5  -4   7    0.55    0.18
   5  -4  -7    0.58    0.23
  -5  -4   7    0.39    0.21
   5  -4  -7    0.48    0.20
  -5   4   7    0.46    0.21
   5   4  -7    0.78    0.17
  -5   4   7    0.09    0.22
   5   4  -7    0.25    0.21
   5   4  -7    0.55    0.20
  -4  -4   7   -0.07    0.12
   4  -4  -7   -0.15    0.13
  -4  -4   7   -0.08    0.16
   4  -4  -7   -0.12    0.16
   4   4  -7   -0.09    0.14
  -4   4   7   -0.15    0.15
  -4   4   7   -0.13    0.15
   4   4  -7   -0.04    0.10
   4   4  -7   -0.11    0.27
   3  -4  -7    8.49    0.40
   3  -4  -7    7.72    0.42
  -3  -4   7    8.19    0.39
  -3  -4   7    8.15    0.34
  -3   4   7    7.55    0.42
   3   4  -7    8.61    0.42
  -3   4   7    8.74    0.39
   3   4  -7    7.87    0.29
   3   4  -7    8.11    0.39
  -2  -4   7   18.10    0.57
   2  -4  -7   17.79    0.63
   2  -4  -7   17.77    0.63
  -2  -4   7   16.92    0.53
   2   4  -7   17.23    0.62
  -2   4   7   17.66    0.60
   2   4  -7   18.66    0.60
  -2   4   7   18.21    0.65
   1  -4  -7   31.24    0.96
   1  -4  -7   30.28    0.93
   1   4  -7   30.77    0.89
  -1   4   7   30.50    0.96
   1   4  -7   30.73    0.92
   0  -4  -7   -0.12    0.09
   0  -4  -7   -0.05    0.09
   0   4  -7   -0.05    0.07
   0   4  -7    0.07    0.05
   0   4   7    0.04    0.10
   0   4   7    0.02    0.08
   0   4  -7    0.08    0.08
  -1  -4  -7    1.08    0.16
  -1  -4  -7    1.27    0.18
  -1   4  -7    1.37    0.18
   1   4   7    1.34    0.17
   1   4   7    1.49    0.19
  -2  -4  -7    1.20    0.18
  -2  -4  -7    0.73    0.13
   2   4   7    0.97    0.15
  -2   4  -7    0.80    0.17
   2   4   7    1.00    0.15
  -3  -4  -7   10.26    0.49
  -3  -4  -7   12.04    0.54
   3   4   7   11.63    0.46
  -3   4  -7   10.98    0.35
   3   4   7   11.31    0.47
  -4  -4  -7    0.67    0.17
  -4  -4  -7    0.45    0.17
  -4   4  -7    0.71    0.12
   4   4   7    0.62    0.17
   4   4   7    0.61    0.16
  -4   4  -7    0.52    0.13
  -5  -4  -7    0.41    0.21
  -5  -4  -7    0.31    0.19
   5   4   7    0.29    0.18
  -5   4  -7    0.17    0.15
  -5   4  -7    0.31    0.15
   5   4   7    0.36    0.21
  -6  -4  -7    1.04    0.25
[truncated: 400,058 more chars]
